# Supplementary material for: Evaluation of Policy Effectiveness by Mathematical Modeling for the Opioid Crisis with Spatial Study and Trend Analysis
Source: MDPI journal article supplement (doi:10.3390/healthcare9050585), 2021-05-14
Supplement: s1 [file s1]

Table S1 All the correlation and explanations

| $y_i$    | $x_i$ | Coefficient | Explanation                                                                                                                                                                                                                                      |
|----------|-------|-------------|--------------------------------------------------------------------------------------------------------------------------------------------------------------------------------------------------------------------------------------------------|
| $\rho_i$ | VC17  | 0.03640     | As the majority of the residents are under 18, and their knowledge of drugs are not enough, they are more likely addicted to drugs under the influence of other people. At the same time, opioids are more accessible to young people.           |
|          | VC48  | 0.06348     | Divorced women have a lot of stress in life. In order to alleviate the depressed mood, some divorced women began to use opioids to seek spiritual relaxation and satisfaction.                                                                   |
|          | VC63  | 0.02294     | Without children, the elderly with grandchildren have fewer restrictions on their children, and their drug education for children is relatively not enough, which increases the likelihood of children being exposed to opioids.                 |
|          | VC112 | 0.18404     | Non-institutionalized civilian life is not guaranteed. Coupled with disability, it is possible to gain access to opioids through illegal channels and even abuse opioids to alleviate physical or mental suffering and lead to opioid addiction. |
|          | VC115 | 0.16771     | The same reason as above                                                                                                                                                                                                                         |
|          | VC135 | -0.04632    | People born in Puerto Rico, U.S. Island areas, or born abroad to American are more likely to smoke traditional drugs, and fewer people use opioids.                                                                                              |
|          | VC162 | 0.05931     | There may be more channels of exposure to drugs, including opioids, and becoming drug users.                                                                                                                                                     |
|          | VC194 | 0.03767     | Germany and Ireland are countries where drugs are rampant. Americans with German or Irish descent are likely to be affected by their family and use drugs, including opioids.                                                                    |
|          | VC197 | 0.22746     | The same reason as above                                                                                                                                                                                                                         |
| $q_i$    | VC03  | 0.24625     | Under the situation that the proportion of drug users to the total population is fixed, the larger the total number of households, the more drug users.                                                                                          |
| $Q_i$    | VC10  | 0.01721     | Women's income levels are relatively low, so opium drugs, which are relatively low-priced drugs, are favored, leading to a faster change in                                                                                                      |

|  |       |           |                                                                                                                                                                                                                                              |
|--|-------|-----------|----------------------------------------------------------------------------------------------------------------------------------------------------------------------------------------------------------------------------------------------|
|  |       |           | the proportion of opioids.                                                                                                                                                                                                                   |
|  | VC11  | 0.05519   | Women's income levels are relatively low, so opium drugs, which are relatively low-priced drugs, are favored, leading to a faster change in the proportion of opioids.                                                                       |
|  | VC18  | 0.03360   | Female residents who live with their children alone have a relatively low income level, and higher spendings, thus cheaper drugs such as opioids are more favored, leading to a rapid change in the proportion of opioid drug uses.          |
|  | VC45  | -0.03796  | Married women account for a relatively small proportion of drug users, and a higher proportion of such people leads to a slower change in the proportion of opioids used.                                                                    |
|  | VC46  | -0.00504  | The economic situation of women separated from their husbands is generally not good, with a smaller proportion of drug users and less favored with opioids.                                                                                  |
|  | VC66  | -0.00740  | Without children, the elderly who live with grandchildren have fewer restrictions on their children, making some teenagers become drug addicts. However, because teenagers have no source of income, the trend of such drug users is slower. |
|  | VC77  | 0.01399   | The more children enrolled in kindergartens, the more families there are. In such a family, parents are more likely to reduce drug use or detoxification, resulting in a faster reduction in the proportion of opioids used.                 |
|  | VC89  | 0.00964   | People with higher education have a certain understanding of the dangers of opioids, and they have certain self-control ability. The increase in the proportion of such people will lead to a faster reduction in the proportion of opioids. |
|  | VC101 | 0.12905   | Veterans have a certain degree of self-control through strict training, and they also have a certain understanding of the harm of opioids. The proportion of such people has increased, making the use of opioids less rapid.                |
|  | VC112 | - 0.25485 | Non-institutionalized disabled civilians' lives are not guaranteed, its economic situation is relatively poor and their health conditions are not so good, thus their population is relatively                                               |

|             |       |          |                                                                                                                                                                                                                                                                                                                                                                                                                                                             |
|-------------|-------|----------|-------------------------------------------------------------------------------------------------------------------------------------------------------------------------------------------------------------------------------------------------------------------------------------------------------------------------------------------------------------------------------------------------------------------------------------------------------------|
|             |       |          | small among drug users, and they are less favored for opioids.                                                                                                                                                                                                                                                                                                                                                                                              |
|             | VC162 | -0.01410 | Drug users who are born in Asian Americans may be more inclined to use traditional drugs and have less favor for opioids. The increase in the proportion of such people may lead to a slower rate of change in the use of opioids.                                                                                                                                                                                                                          |
|             | VC186 | -0.22266 | ANCESTRY - Total population - American                                                                                                                                                                                                                                                                                                                                                                                                                      |
|             | VC196 | 0.08472  | ANCESTRY - Total population - Hungarian                                                                                                                                                                                                                                                                                                                                                                                                                     |
| $LOFC_k(i)$ | VC48  | 0.05785  | MARITAL STATUS - Females 15 years and over - Divorced                                                                                                                                                                                                                                                                                                                                                                                                       |
|             | VC77  | -0.02714 | SCHOOL ENROLLMENT - Population 3 years and over enrolled in school - Nursery school, preschool                                                                                                                                                                                                                                                                                                                                                              |
|             | VC88  | -0.08638 | EDUCATIONAL ATTAINMENT - Population 25 years and over - High school graduate (includes equivalency                                                                                                                                                                                                                                                                                                                                                          |
|             | VC89  | 0.04705  | EDUCATIONAL ATTAINMENT - Population 25 years and over - Some college, no degree                                                                                                                                                                                                                                                                                                                                                                             |
|             | VC114 | 0.50514  | People with disabilities are more likely to be exposed to opioids. Without the correct guidance of doctors, the possibility of misuse or even abuse is high. Therefore, the more people with disabilities in a county, the more likely they are to have opioids. Therefore, the more disabled people there are in a county, the more likely there will be opioid cases, and the greater the advantage ratio of the county relative to surrounding counties. |
|             | VC122 | 0.23481  | If a county has a small population flow range, it is more likely to form a gathering place for drug users, which provides certain conditions for the increase of drug users in the county. Therefore, the county maybe have a greater advantage ratio of the county relative to surrounding counties.                                                                                                                                                       |
|             | VC124 | -0.11491 | RESIDENCE 1 YEAR AGO - Population 1 year and over - Different house in the U.S. - Different county - Same state                                                                                                                                                                                                                                                                                                                                             |
|             | VC161 | -0.02056 | WORLD REGION OF BIRTH OF FOREIGN BORN - Foreign-born population, excluding population born at sea - Europe                                                                                                                                                                                                                                                                                                                                                  |
|             | VC162 | 0.06079  | WORLD REGION OF BIRTH OF FOREIGN BORN - Foreign-born population, excluding population born at sea - Asia                                                                                                                                                                                                                                                                                                                                                    |

|  |       |          |                                      |
|--|-------|----------|--------------------------------------|
|  | VC194 | -0.02320 | ANCESTRY - Total population - German |
|--|-------|----------|--------------------------------------|
