# Supplementary material for: Evaluation of Policy Effectiveness by Mathematical Modeling for the Opioid Crisis with Spatial Study and Trend Analysis
Source: MDPI journal article supplement (doi:10.3390/healthcare9050585), 2021-05-14
Supplement: s1 [file s1]

**Excel Table S1** Drug cases report released by National Forensic Laboratory Information System (NFLIS) in Ohio, Kentucky, West Virginia, Virginia, and Tennessee.

**Excel Table S2** 2010 Population demographics in Ohio, Kentucky, West Virginia, Virginia, and Tennessee.

**Excel Table S3** 2011 Population demographics in Ohio, Kentucky, West Virginia, Virginia, and Tennessee.

**Excel Table S4** 2012 Population demographics in Ohio, Kentucky, West Virginia, Virginia, and Tennessee.

**Excel Table S5** 2013 Population demographics in Ohio, Kentucky, West Virginia, Virginia, and Tennessee.

**Excel Table S6** 2014 Population demographics in Ohio, Kentucky, West Virginia, Virginia, and Tennessee.

**Excel Table S7** 2015 Population demographics in Ohio, Kentucky, West Virginia, Virginia, and Tennessee.

**Excel Table S8** 2016 Population demographics in Ohio, Kentucky, West Virginia, Virginia, and Tennessee.

**Excel Table S9** The description of the variables in the population demographic data.

**Table S10** All the correlation and explanations.
