# Supplementary material for: Evaluation of Policy Effectiveness by Mathematical Modeling for the Opioid Crisis with Spatial Study and Trend Analysis
Source: Healthcare (Basel). 2021 May 14;9(5):585. doi: 10.3390/healthcare9050585 (PMC8155830; doi:10.3390/healthcare9050585)
Supplement: Supplementary file 1 [file healthcare-09-00585-s001.zip]

Archive with 11 entries (11 files):
- Supplementary table captions.pdf
- Table S1.xlsx
- Table S10.pdf
- Table S2.xlsx
- Table S3.xlsx
- Table S4.xlsx
- Table S5.xlsx
- Table S6.xlsx
- Table S7.xlsx
- Table S8.xlsx
- Table S9.xlsx
