# Supplementary material for: Evaluation of Policy Effectiveness by Mathematical Modeling for the Opioid Crisis with Spatial Study and Trend Analysis
Source: Healthcare (Basel). 2021 May 14;9(5):585. doi: 10.3390/healthcare9050585 (PMC8155830; doi:10.3390/healthcare9050585)
Supplement: Supplementary file 1 [file healthcare-09-00585-s001.zip › Table S1.xlsx]

## Sheet: Notes
DATE RANGE:	2010 - 2017
REQUESTED DRUGS:	NARCOTIC ANALGESICS AND HEROIN
LOCATION:	VA, OH, KY,WV, PA (by county)

## Sheet: Data
YYYY	State	COUNTY	FIPS_State	FIPS_County	FIPS_Combined	SubstanceName	DrugReports	TotalDrugReportsCounty	TotalDrugReportsState
2010	VA	ACCOMACK	51	001	51001	Propoxyphene	1	84	41462
2010	OH	ADAMS	39	001	39001	Morphine	9	527	70999
2010	PA	ADAMS	42	001	42001	Methadone	2	334	89981
2010	VA	ALEXANDRIA CITY	51	510	51510	Heroin	5	427	41462
2010	PA	ALLEGHENY	42	003	42003	Hydromorphone	5	8500	89981
2010	KY	ALLEN	21	003	21003	Oxycodone	15	168	29588
2010	KY	ALLEN	21	003	21003	Oxymorphone	1	168	29588
2010	VA	AMELIA	51	007	51007	Heroin	1	94	41462
2010	VA	ARLINGTON	51	013	51013	Heroin	41	610	41462
2010	PA	ARMSTRONG	42	005	42005	Dextropropoxyphene	1	344	89981
2010	OH	ASHLAND	39	005	39005	Oxycodone	45	766	70999
2010	OH	ASHLAND	39	005	39005	Oxymorphone	2	766	70999
2010	OH	ASHTABULA	39	007	39007	Buprenorphine	7	571	70999
2010	OH	ASHTABULA	39	007	39007	Hydrocodone	21	571	70999
2010	OH	ATHENS	39	009	39009	Heroin	72	664	70999
2010	OH	ATHENS	39	009	39009	Propoxyphene	1	664	70999
2010	OH	AUGLAIZE	39	011	39011	Heroin	35	184	70999
2010	OH	AUGLAIZE	39	011	39011	Methadone	1	184	70999
2010	OH	AUGLAIZE	39	011	39011	Propoxyphene	2	184	70999
2010	WV	BARBOUR	54	001	54001	Oxycodone	1	16	8668
2010	KY	BARREN	21	009	21009	Morphine	3	383	29588
2010	KY	BATH	21	011	21011	Buprenorphine	1	81	29588
2010	KY	BATH	21	011	21011	Hydrocodone	7	81	29588
2010	PA	BEDFORD	42	009	42009	Hydrocodone	3	150	89981
2010	VA	BEDFORD	51	019	51019	Meperidine	1	177	41462
2010	KY	BELL	21	013	21013	Oxycodone	148	387	29588
2010	KY	BELL	21	013	21013	Oxymorphone	3	387	29588
2010	WV	BERKELEY	54	003	54003	Hydrocodone	6	722	8668
2010	PA	BERKS	42	011	42011	Morphine	5	2146	89981
2010	VA	BLAND	51	021	51021	Propoxyphene	1	25	41462
2010	KY	BOONE	21	015	21015	Oxycodone	56	299	29588
2010	WV	BOONE	54	005	54005	Fentanyl	1	90	8668
2010	KY	BRACKEN	21	023	21023	Oxycodone	5	28	29588
2010	WV	BRAXTON	54	007	54007	Hydrocodone	35	167	8668
2010	KY	BREATHITT	21	025	21025	Methadone	13	162	29588
2010	KY	BRECKINRIDGE	21	027	21027	Morphine	1	78	29588
2010	OH	BROWN	39	015	39015	Fentanyl	1	213	70999
2010	OH	BROWN	39	015	39015	Heroin	14	213	70999
2010	VA	BUCKINGHAM	51	029	51029	Heroin	1	136	41462
2010	VA	BUCKINGHAM	51	029	51029	Methadone	2	136	41462
2010	PA	BUCKS	42	017	42017	Hydromorphone	5	6140	89981
2010	PA	BUCKS	42	017	42017	Methadone	32	6140	89981
2010	KY	BULLITT	21	029	21029	Hydromorphone	2	316	29588
2010	OH	BUTLER	39	017	39017	Buprenorphine	15	1825	70999
2010	OH	BUTLER	39	017	39017	Hydrocodone	80	1825	70999
2010	PA	BUTLER	42	019	42019	Oxycodone	9	310	89981
2010	PA	BUTLER	42	019	42019	Oxymorphone	2	310	89981
2010	WV	CABELL	54	011	54011	Oxycodone	116	517	8668
2010	WV	CALHOUN	54	013	54013	Oxycodone	1	8	8668
2010	PA	CAMBRIA	42	021	42021	Oxycodone	44	483	89981
2010	PA	CAMERON	42	023	42023	Heroin	1	7	89981
2010	PA	CAMERON	42	023	42023	Oxycodone	2	7	89981
2010	PA	CARBON	42	025	42025	Heroin	20	209	89981
2010	PA	CARBON	42	025	42025	Propoxyphene	1	209	89981
2010	VA	CAROLINE	51	033	51033	Hydrocodone	5	138	41462
2010	VA	CAROLINE	51	033	51033	Oxycodone	8	138	41462
2010	KY	CARROLL	21	041	21041	Heroin	8	99	29588
2010	OH	CARROLL	39	019	39019	Oxycodone	2	57	70999
2010	KY	CARTER	21	043	21043	Methadone	1	354	29588
2010	KY	CASEY	21	045	21045	Morphine	1	148	29588
2010	VA	CHARLOTTESVILLE CITY	51	540	51540	Buprenorphine	1	264	41462
2010	VA	CHESAPEAKE CITY	51	550	51550	Methadone	3	881	41462
2010	PA	CHESTER	42	029	42029	Heroin	95	1979	89981
2010	VA	CHESTERFIELD	51	041	51041	Hydromorphone	5	1331	41462
2010	VA	CHESTERFIELD	51	041	51041	Morphine	9	1331	41462
2010	KY	CHRISTIAN	21	047	21047	Hydromorphone	7	439	29588
2010	KY	CHRISTIAN	21	047	21047	Morphine	3	439	29588
2010	PA	CLARION	42	031	42031	Heroin	35	221	89981
2010	PA	CLEARFIELD	42	033	42033	Buprenorphine	11	218	89981
2010	OH	CLERMONT	39	025	39025	Methadone	17	752	70999
2010	OH	CLINTON	39	027	39027	Methadone	5	455	70999
2010	VA	COLONIAL HEIGHTS CITY	51	570	51570	Morphine	2	190	41462
2010	PA	COLUMBIA	42	037	42037	Fentanyl	1	131	89981
2010	PA	COLUMBIA	42	037	42037	Heroin	29	131	89981
2010	OH	COLUMBIANA	39	029	39029	Heroin	34	341	70999
2010	OH	COLUMBIANA	39	029	39029	Methadone	1	341	70999
2010	OH	CRAWFORD	39	033	39033	Morphine	3	218	70999
2010	PA	CRAWFORD	42	039	42039	Dihydromorphone	1	433	89981
2010	PA	CRAWFORD	42	039	42039	Fentanyl	2	433	89981
2010	PA	CRAWFORD	42	039	42039	Propoxyphene	2	433	89981
2010	KY	CRITTENDEN	21	055	21055	Hydrocodone	8	34	29588
2010	OH	CUYAHOGA	39	035	39035	Methorphan	2	3556	70999
2010	OH	CUYAHOGA	39	035	39035	Oxycodone	251	3556	70999
2010	OH	CUYAHOGA	39	035	39035	Oxymorphone	4	3556	70999
2010	VA	DANVILLE CITY	51	590	51590	Oxycodone	6	332	41462
2010	PA	DAUPHIN	42	043	42043	Codeine	3	2575	89981
2010	KY	DAVIESS	21	059	21059	Codeine	1	591	29588
2010	OH	DEFIANCE	39	039	39039	Buprenorphine	2	589	70999
2010	OH	DEFIANCE	39	039	39039	Hydrocodone	9	589	70999
2010	OH	DELAWARE	39	041	39041	Hydromorphone	1	1774	70999
2010	PA	DELAWARE	42	045	42045	Buprenorphine	97	4534	89981
2010	PA	DELAWARE	42	045	42045	Hydrocodone	61	4534	89981
2010	VA	DICKENSON	51	051	51051	Buprenorphine	14	103	41462
2010	WV	DODDRIDGE	54	017	54017	Oxycodone	2	16	8668
2010	OH	ERIE	39	043	39043	Buprenorphine	5	552	70999
2010	OH	ERIE	39	043	39043	Propoxyphene	1	552	70999
2010	PA	ERIE	42	049	42049	Methadone	2	1570	89981
2010	VA	ESSEX	51	057	51057	Hydromorphone	2	94	41462
2010	VA	FAIRFAX	51	059	51059	Fentanyl	2	3337	41462
2010	VA	FAIRFAX	51	059	51059	Oxycodone	167	3337	41462
2010	VA	ACCOMACK	51	001	51001	Oxycodone	1	84	41462
2010	KY	ADAIR	21	001	21001	Methadone	1	88	29588
2010	PA	ADAMS	42	001	42001	Oxymorphone	1	334	89981
2010	VA	ALBEMARLE	51	003	51003	Hydrocodone	7	282	41462
2010	VA	ALBEMARLE	51	003	51003	Oxycodone	3	282	41462
2010	VA	ALLEGHANY	51	005	51005	Hydrocodone	13	154	41462
2010	VA	ALLEGHANY	51	005	51005	Tramadol	1	154	41462
2010	PA	ALLEGHENY	42	003	42003	Fentanyl	3	8500	89981
2010	PA	ALLEGHENY	42	003	42003	Morphine	20	8500	89981
2010	OH	ALLEN	39	003	39003	Oxycodone	51	580	70999
2010	VA	AMELIA	51	007	51007	Hydrocodone	2	94	41462
2010	VA	AMHERST	51	009	51009	Hydromorphone	5	411	41462
2010	VA	ARLINGTON	51	013	51013	Morphine	6	610	41462
2010	OH	ASHLAND	39	005	39005	Codeine	1	766	70999
2010	OH	AUGLAIZE	39	011	39011	Hydrocodone	4	184	70999
2010	VA	AUGUSTA	51	015	51015	Propoxyphene	1	344	41462
2010	KY	BARREN	21	009	21009	Hydromorphone	3	383	29588
2010	KY	BARREN	21	009	21009	Methadone	2	383	29588
2010	VA	BATH	51	017	51017	Oxycodone	2	40	41462
2010	PA	BEAVER	42	007	42007	Codeine	2	625	89981
2010	PA	BEAVER	42	007	42007	Oxymorphone	2	625	89981
2010	PA	BEDFORD	42	009	42009	Buprenorphine	6	150	89981
2010	VA	BEDFORD	51	019	51019	Hydromorphone	2	177	41462
2010	KY	BELL	21	013	21013	Buprenorphine	11	387	29588
2010	OH	BELMONT	39	013	39013	Codeine	1	231	70999
2010	WV	BERKELEY	54	003	54003	Heroin	146	722	8668
2010	VA	BLAND	51	021	51021	Hydrocodone	4	25	41462
2010	VA	BLAND	51	021	51021	Oxycodone	4	25	41462
2010	KY	BOONE	21	015	21015	Heroin	47	299	29588
2010	KY	BOONE	21	015	21015	Propoxyphene	1	299	29588
2010	KY	BOURBON	21	017	21017	Morphine	3	161	29588
2010	KY	BOYD	21	019	21019	Heroin	5	504	29588
2010	KY	BOYD	21	019	21019	Hydrocodone	21	504	29588
2010	KY	BOYLE	21	021	21021	Hydrocodone	21	200	29588
2010	KY	BOYLE	21	021	21021	Oxycodone	31	200	29588
2010	KY	BREATHITT	21	025	21025	Heroin	4	162	29588
2010	VA	BRISTOL	51	520	51520	Morphine	13	276	41462
2010	OH	BROWN	39	015	39015	Morphine	5	213	70999
2010	VA	BUCHANAN	51	027	51027	Hydrocodone	23	185	41462
2010	PA	BUCKS	42	017	42017	Codeine	13	6140	89981
2010	VA	BUENA VISTA CITY	51	530	51530	Oxycodone	2	44	41462
2010	KY	BULLITT	21	029	21029	Morphine	1	316	29588
2010	KY	CALLOWAY	21	035	21035	Oxycodone	1	97	29588
2010	PA	CAMERON	42	023	42023	Buprenorphine	1	7	89981
2010	KY	CAMPBELL	21	037	21037	Buprenorphine	5	852	29588
2010	VA	CAMPBELL	51	031	51031	Oxycodone	6	209	41462
2010	VA	CAMPBELL	51	031	51031	Oxymorphone	1	209	41462
2010	VA	CARROLL	51	035	51035	Hydrocodone	12	166	41462
2010	KY	CARTER	21	043	21043	Hydromorphone	1	354	29588
2010	KY	CARTER	21	043	21043	Morphine	3	354	29588
2010	KY	CARTER	21	043	21043	Tramadol	2	354	29588
2010	PA	CENTRE	42	027	42027	Buprenorphine	11	1028	89981
2010	OH	CHAMPAIGN	39	021	39021	Hydrocodone	17	214	70999
2010	VA	CHARLOTTESVILLE CITY	51	540	51540	Oxycodone	4	264	41462
2010	VA	CHESAPEAKE CITY	51	550	51550	Oxycodone	12	881	41462
2010	PA	CHESTER	42	029	42029	Hydrocodone	23	1979	89981
2010	PA	CHESTER	42	029	42029	Oxycodone	82	1979	89981
2010	KY	CLARK	21	049	21049	Morphine	1	214	29588
2010	VA	CLARKE	51	043	51043	Tramadol	1	35	41462
2010	KY	CLAY	21	051	21051	Oxycodone	39	208	29588
2010	PA	CLEARFIELD	42	033	42033	Oxycodone	13	218	89981
2010	PA	CLEARFIELD	42	033	42033	Oxymorphone	1	218	89981
2010	OH	CLERMONT	39	025	39025	Codeine	2	752	70999
2010	KY	CLINTON	21	053	21053	Morphine	1	75	29588
2010	OH	CLINTON	39	027	39027	Fentanyl	2	455	70999
2010	OH	CLINTON	39	027	39027	Morphine	5	455	70999
2010	PA	CLINTON	42	035	42035	Oxycodone	1	118	89981
2010	VA	COLONIAL HEIGHTS CITY	51	570	51570	Fentanyl	1	190	41462
2010	VA	COLONIAL HEIGHTS CITY	51	570	51570	Hydromorphone	2	190	41462
2010	VA	COLONIAL HEIGHTS CITY	51	570	51570	Methadone	1	190	41462
2010	OH	COSHOCTON	39	031	39031	Oxycodone	2	75	70999
2010	VA	CRAIG	51	045	51045	Hydrocodone	7	69	41462
2010	PA	CRAWFORD	42	039	42039	Morphine	12	433	89981
2010	PA	CRAWFORD	42	039	42039	Tramadol	1	433	89981
2010	VA	CULPEPER	51	047	51047	Oxycodone	34	492	41462
2010	VA	CULPEPER	51	047	51047	Oxymorphone	1	492	41462
2010	KY	CUMBERLAND	21	057	21057	Hydrocodone	3	17	29588
2010	VA	CUMBERLAND	51	049	51049	Hydrocodone	3	64	41462
2010	OH	CUYAHOGA	39	035	39035	Buprenorphine	36	3556	70999
2010	OH	DARKE	39	037	39037	Morphine	2	156	70999
2010	PA	DAUPHIN	42	043	42043	Fentanyl	1	2575	89981
2010	PA	DAUPHIN	42	043	42043	Hydromorphone	2	2575	89981
2010	PA	DAUPHIN	42	043	42043	Morphine	12	2575	89981
2010	KY	DAVIESS	21	059	21059	Oxycodone	3	591	29588
2010	OH	DELAWARE	39	041	39041	Morphine	4	1774	70999
2010	PA	DELAWARE	42	045	42045	Tramadol	1	4534	89981
2010	VA	DICKENSON	51	051	51051	Oxycodone	18	103	41462
2010	VA	DICKENSON	51	051	51051	Oxymorphone	1	103	41462
2010	VA	DINWIDDIE	51	053	51053	Hydrocodone	1	131	41462
2010	KY	ELLIOTT	21	063	21063	Heroin	1	91	29588
2010	OH	ERIE	39	043	39043	Hydrocodone	19	552	70999
2010	OH	ERIE	39	043	39043	Oxycodone	40	552	70999
2010	OH	ERIE	39	043	39043	Oxymorphone	4	552	70999
2010	PA	ERIE	42	049	42049	Codeine	5	1570	89981
2010	VA	ESSEX	51	057	51057	Morphine	1	94	41462
2010	VA	FAIRFAX	51	059	51059	Codeine	5	3337	41462
2010	VA	FAIRFAX	51	059	51059	Methorphan	1	3337	41462
2010	VA	FAIRFAX CITY	51	600	51600	Hydrocodone	2	148	41462
2010	VA	FAIRFAX CITY	51	600	51600	Methorphan	2	148	41462
2010	OH	FAIRFIELD	39	045	39045	Heroin	186	846	70999
2010	VA	ALBEMARLE	51	003	51003	Heroin	4	282	41462
2010	VA	ALEXANDRIA CITY	51	510	51510	Methadone	2	427	41462
2010	VA	ALLEGHANY	51	005	51005	Fentanyl	3	154	41462
2010	VA	ALLEGHANY	51	005	51005	Methadone	4	154	41462
2010	PA	ALLEGHENY	42	003	42003	Oxycodone	280	8500	89981
2010	PA	ALLEGHENY	42	003	42003	Propoxyphene	10	8500	89981
2010	OH	ALLEN	39	003	39003	Fentanyl	1	580	70999
2010	OH	ALLEN	39	003	39003	Propoxyphene	2	580	70999
2010	VA	AMHERST	51	009	51009	Codeine	3	411	41462
2010	VA	AMHERST	51	009	51009	Morphine	1	411	41462
2010	KY	ANDERSON	21	005	21005	Buprenorphine	1	98	29588
2010	KY	ANDERSON	21	005	21005	Hydrocodone	7	98	29588
2010	KY	ANDERSON	21	005	21005	Morphine	3	98	29588
2010	PA	ARMSTRONG	42	005	42005	Oxycodone	4	344	89981
2010	PA	ARMSTRONG	42	005	42005	Oxymorphone	2	344	89981
2010	OH	ATHENS	39	009	39009	Morphine	4	664	70999
2010	VA	AUGUSTA	51	015	51015	Oxycodone	9	344	41462
2010	KY	BARREN	21	009	21009	Oxycodone	11	383	29588
2010	KY	BATH	21	011	21011	Methadone	1	81	29588
2010	PA	BEAVER	42	007	42007	Hydrocodone	9	625	89981
2010	VA	BEDFORD CITY	51	515	51515	Oxycodone	1	4	41462
2010	KY	BELL	21	013	21013	Hydromorphone	1	387	29588
2010	OH	BELMONT	39	013	39013	Oxycodone	19	231	70999
2010	WV	BERKELEY	54	003	54003	Oxycodone	9	722	8668
2010	PA	BERKS	42	011	42011	Fentanyl	1	2146	89981
2010	PA	BERKS	42	011	42011	Heroin	172	2146	89981
2010	PA	BLAIR	42	013	42013	Tramadol	1	662	89981
2010	VA	BOTETOURT	51	023	51023	Buprenorphine	2	175	41462
2010	VA	BOTETOURT	51	023	51023	Hydrocodone	9	175	41462
2010	KY	BOURBON	21	017	21017	Hydrocodone	2	161	29588
2010	KY	BOYD	21	019	21019	Methadone	5	504	29588
2010	PA	BRADFORD	42	015	42015	Buprenorphine	1	145	89981
2010	PA	BRADFORD	42	015	42015	Codeine	2	145	89981
2010	PA	BRADFORD	42	015	42015	Hydrocodone	13	145	89981
2010	PA	BRADFORD	42	015	42015	Morphine	4	145	89981
2010	KY	BREATHITT	21	025	21025	Buprenorphine	3	162	29588
2010	KY	BREATHITT	21	025	21025	Hydrocodone	17	162	29588
2010	KY	BREATHITT	21	025	21025	Morphine	4	162	29588
2010	VA	BUCHANAN	51	027	51027	Oxycodone	98	185	41462
2010	PA	BUCKS	42	017	42017	Fentanyl	2	6140	89981
2010	PA	BUCKS	42	017	42017	Heroin	618	6140	89981
2010	PA	BUCKS	42	017	42017	Propoxyphene	3	6140	89981
2010	PA	BUCKS	42	017	42017	Tramadol	27	6140	89981
2010	KY	BULLITT	21	029	21029	Oxycodone	71	316	29588
2010	KY	BULLITT	21	029	21029	Oxymorphone	2	316	29588
2010	OH	BUTLER	39	017	39017	Methadone	17	1825	70999
2010	WV	CALHOUN	54	013	54013	Hydrocodone	1	8	8668
2010	WV	CALHOUN	54	013	54013	Morphine	1	8	8668
2010	PA	CAMBRIA	42	021	42021	Hydrocodone	13	483	89981
2010	VA	CAMPBELL	51	031	51031	Fentanyl	1	209	41462
2010	VA	CAROLINE	51	033	51033	Hydromorphone	1	138	41462
2010	OH	CARROLL	39	019	39019	Buprenorphine	1	57	70999
2010	VA	CARROLL	51	035	51035	Heroin	2	166	41462
2010	KY	CARTER	21	043	21043	Buprenorphine	4	354	29588
2010	KY	CARTER	21	043	21043	Hydrocodone	17	354	29588
2010	OH	CHAMPAIGN	39	021	39021	Fentanyl	1	214	70999
2010	OH	CHAMPAIGN	39	021	39021	Heroin	37	214	70999
2010	VA	CHARLOTTE	51	037	51037	Codeine	1	75	41462
2010	VA	CHARLOTTE	51	037	51037	Hydrocodone	2	75	41462
2010	VA	CHARLOTTESVILLE CITY	51	540	51540	Heroin	3	264	41462
2010	VA	CHESAPEAKE CITY	51	550	51550	Buprenorphine	7	881	41462
2010	VA	CHESAPEAKE CITY	51	550	51550	Codeine	2	881	41462
2010	VA	CHESAPEAKE CITY	51	550	51550	Hydrocodone	14	881	41462
2010	PA	CHESTER	42	029	42029	Codeine	5	1979	89981
2010	VA	CHESTERFIELD	51	041	51041	Heroin	69	1331	41462
2010	VA	CHESTERFIELD	51	041	51041	Methadone	6	1331	41462
2010	KY	CHRISTIAN	21	047	21047	Oxycodone	19	439	29588
2010	PA	CLARION	42	031	42031	Buprenorphine	7	221	89981
2010	PA	CLARION	42	031	42031	Morphine	5	221	89981
2010	KY	CLARK	21	049	21049	Methadone	8	214	29588
2010	VA	CLARKE	51	043	51043	Heroin	4	35	41462
2010	PA	CLEARFIELD	42	033	42033	Methadone	1	218	89981
2010	OH	CLERMONT	39	025	39025	Fentanyl	1	752	70999
2010	OH	CLERMONT	39	025	39025	Heroin	167	752	70999
2010	OH	CLINTON	39	027	39027	Buprenorphine	7	455	70999
2010	OH	CLINTON	39	027	39027	Hydrocodone	17	455	70999
2010	PA	CLINTON	42	035	42035	Propoxyphene	1	118	89981
2010	OH	COLUMBIANA	39	029	39029	Buprenorphine	2	341	70999
2010	OH	COLUMBIANA	39	029	39029	Morphine	2	341	70999
2010	VA	CRAIG	51	045	51045	Heroin	12	69	41462
2010	VA	CRAIG	51	045	51045	Methadone	2	69	41462
2010	OH	CRAWFORD	39	033	39033	Heroin	48	218	70999
2010	OH	CRAWFORD	39	033	39033	Propoxyphene	2	218	70999
2010	PA	CRAWFORD	42	039	42039	Methadone	1	433	89981
2010	PA	CUMBERLAND	42	041	42041	Oxycodone	5	310	89981
2010	VA	CUMBERLAND	51	049	51049	Heroin	2	64	41462
2010	OH	CUYAHOGA	39	035	39035	Codeine	12	3556	70999
2010	OH	CUYAHOGA	39	035	39035	Morphine	21	3556	70999
2010	OH	DEFIANCE	39	039	39039	Methadone	2	589	70999
2010	OH	DELAWARE	39	041	39041	Oxycodone	82	1774	70999
2010	PA	DELAWARE	42	045	42045	Methorphan	6	4534	89981
2010	VA	DICKENSON	51	051	51051	Methadone	2	103	41462
2010	VA	DINWIDDIE	51	053	51053	Oxycodone	8	131	41462
2010	PA	ELK	42	047	42047	Oxycodone	6	123	89981
2010	VA	EMPORIA CITY	51	595	51595	Oxycodone	25	91	41462
2010	PA	ERIE	42	049	42049	Oxycodone	54	1570	89981
2010	PA	ERIE	42	049	42049	Oxymorphone	3	1570	89981
2010	VA	ESSEX	51	057	51057	Hydrocodone	1	94	41462
2010	KY	ESTILL	21	065	21065	Buprenorphine	1	85	29588
2010	KY	ESTILL	21	065	21065	Hydrocodone	6	85	29588
2010	VA	ACCOMACK	51	001	51001	Hydrocodone	6	84	41462
2010	OH	ADAMS	39	001	39001	Buprenorphine	6	527	70999
2010	OH	ADAMS	39	001	39001	Heroin	50	527	70999
2010	OH	ADAMS	39	001	39001	Tramadol	1	527	70999
2010	PA	ADAMS	42	001	42001	Oxycodone	29	334	89981
2010	VA	ALEXANDRIA CITY	51	510	51510	Oxycodone	5	427	41462
2010	VA	AMELIA	51	007	51007	Fentanyl	1	94	41462
2010	VA	AMELIA	51	007	51007	Oxycodone	1	94	41462
2010	VA	AMHERST	51	009	51009	Heroin	7	411	41462
2010	VA	AMHERST	51	009	51009	Propoxyphene	2	411	41462
2010	KY	ANDERSON	21	005	21005	Methadone	2	98	29588
2010	VA	ARLINGTON	51	013	51013	Oxycodone	38	610	41462
2010	VA	ARLINGTON	51	013	51013	Tramadol	4	610	41462
2010	OH	ASHLAND	39	005	39005	Heroin	82	766	70999
2010	OH	ASHLAND	39	005	39005	Methadone	2	766	70999
2010	OH	ASHTABULA	39	007	39007	Codeine	3	571	70999
2010	OH	ASHTABULA	39	007	39007	Morphine	3	571	70999
2010	OH	ATHENS	39	009	39009	Oxycodone	122	664	70999
2010	OH	ATHENS	39	009	39009	Oxymorphone	3	664	70999
2010	OH	AUGLAIZE	39	011	39011	Oxycodone	6	184	70999
2010	VA	AUGUSTA	51	015	51015	Hydromorphone	2	344	41462
2010	VA	AUGUSTA	51	015	51015	Methadone	3	344	41462
2010	KY	BARREN	21	009	21009	Buprenorphine	2	383	29588
2010	KY	BARREN	21	009	21009	Hydrocodone	37	383	29588
2010	KY	BARREN	21	009	21009	Meperidine	1	383	29588
2010	KY	BELL	21	013	21013	Fentanyl	1	387	29588
2010	KY	BELL	21	013	21013	Heroin	2	387	29588
2010	KY	BELL	21	013	21013	Propoxyphene	1	387	29588
2010	WV	BERKELEY	54	003	54003	Buprenorphine	7	722	8668
2010	WV	BERKELEY	54	003	54003	Dextropropoxyphene	1	722	8668
2010	PA	BERKS	42	011	42011	Buprenorphine	6	2146	89981
2010	PA	BLAIR	42	013	42013	Codeine	1	662	89981
2010	VA	BLAND	51	021	51021	Oxymorphone	1	25	41462
2010	KY	BOONE	21	015	21015	Methadone	6	299	29588
2010	WV	BOONE	54	005	54005	Oxymorphone	2	90	8668
2010	VA	BOTETOURT	51	023	51023	Methadone	1	175	41462
2010	KY	BOURBON	21	017	21017	Oxycodone	39	161	29588
2010	KY	BOYD	21	019	21019	Oxycodone	254	504	29588
2010	KY	BOYD	21	019	21019	Oxymorphone	1	504	29588
2010	KY	BRACKEN	21	023	21023	Heroin	1	28	29588
2010	WV	BRAXTON	54	007	54007	Buprenorphine	1	167	8668
2010	VA	BRISTOL	51	520	51520	Oxycodone	45	276	41462
2010	VA	BRISTOL	51	520	51520	Oxymorphone	1	276	41462
2010	WV	BROOKE	54	009	54009	Hydrocodone	3	9	8668
2010	OH	BROWN	39	015	39015	Oxycodone	35	213	70999
2010	OH	BROWN	39	015	39015	Oxymorphone	2	213	70999
2010	VA	BUCHANAN	51	027	51027	Hydromorphone	1	185	41462
2010	VA	BUCKINGHAM	51	029	51029	Oxycodone	9	136	41462
2010	VA	BUENA VISTA CITY	51	530	51530	Hydrocodone	2	44	41462
2010	VA	BUENA VISTA CITY	51	530	51530	Morphine	1	44	41462
2010	KY	BUTLER	21	031	21031	Oxycodone	1	102	29588
2010	OH	BUTLER	39	017	39017	Codeine	3	1825	70999
2010	OH	BUTLER	39	017	39017	Morphine	15	1825	70999
2010	PA	BUTLER	42	019	42019	Heroin	49	310	89981
2010	PA	BUTLER	42	019	42019	Methadone	1	310	89981
2010	WV	CABELL	54	011	54011	Hydrocodone	16	517	8668
2010	PA	CAMBRIA	42	021	42021	Heroin	57	483	89981
2010	PA	CAMBRIA	42	021	42021	Methadone	10	483	89981
2010	KY	CAMPBELL	21	037	21037	Methadone	17	852	29588
2010	PA	CARBON	42	025	42025	Oxycodone	3	209	89981
2010	KY	CARLISLE	21	039	21039	Fentanyl	2	26	29588
2010	KY	CARROLL	21	041	21041	Oxycodone	29	99	29588
2010	KY	CARROLL	21	041	21041	Oxymorphone	1	99	29588
2010	KY	CARTER	21	043	21043	Oxycodone	210	354	29588
2010	KY	CASEY	21	045	21045	Buprenorphine	7	148	29588
2010	OH	CHAMPAIGN	39	021	39021	Morphine	4	214	70999
2010	VA	CHARLOTTESVILLE CITY	51	540	51540	Morphine	1	264	41462
2010	VA	CHESTERFIELD	51	041	51041	Codeine	3	1331	41462
2010	PA	CLARION	42	031	42031	Oxycodone	1	221	89981
2010	PA	CLARION	42	031	42031	Oxymorphone	1	221	89981
2010	KY	CLARK	21	049	21049	Hydrocodone	6	214	29588
2010	OH	CLARK	39	023	39023	Hydrocodone	3	186	70999
2010	OH	CLARK	39	023	39023	Oxycodone	3	186	70999
2010	VA	CLARKE	51	043	51043	Morphine	1	35	41462
2010	WV	CLAY	54	015	54015	Hydrocodone	9	50	8668
2010	PA	CLEARFIELD	42	033	42033	Hydrocodone	14	218	89981
2010	KY	CLINTON	21	053	21053	Hydrocodone	11	75	29588
2010	VA	COLONIAL HEIGHTS CITY	51	570	51570	Buprenorphine	1	190	41462
2010	PA	COLUMBIA	42	037	42037	Oxycodone	3	131	89981
2010	OH	COSHOCTON	39	031	39031	Hydrocodone	2	75	70999
2010	OH	COSHOCTON	39	031	39031	Morphine	4	75	70999
2010	VA	CRAIG	51	045	51045	Morphine	2	69	41462
2010	OH	CRAWFORD	39	033	39033	Buprenorphine	2	218	70999
2010	PA	CRAWFORD	42	039	42039	Hydrocodone	15	433	89981
2010	PA	CRAWFORD	42	039	42039	Oxycodone	14	433	89981
2010	KY	CUMBERLAND	21	057	21057	Oxycodone	4	17	29588
2010	VA	CUMBERLAND	51	049	51049	Methadone	1	64	41462
2010	OH	CUYAHOGA	39	035	39035	Fentanyl	1	3556	70999
2010	OH	CUYAHOGA	39	035	39035	Heroin	462	3556	70999
2010	OH	CUYAHOGA	39	035	39035	Propoxyphene	7	3556	70999
2010	VA	DANVILLE CITY	51	590	51590	Methadone	8	332	41462
2010	OH	DARKE	39	037	39037	Buprenorphine	2	156	70999
2010	OH	DARKE	39	037	39037	Hydrocodone	2	156	70999
2010	OH	DARKE	39	037	39037	Propoxyphene	1	156	70999
2010	PA	DAUPHIN	42	043	42043	Buprenorphine	7	2575	89981
2010	PA	DAUPHIN	42	043	42043	Hydrocodone	27	2575	89981
2010	KY	DAVIESS	21	059	21059	Hydrocodone	27	591	29588
2010	OH	DEFIANCE	39	039	39039	Codeine	12	589	70999
2010	PA	DELAWARE	42	045	42045	Codeine	12	4534	89981
2010	PA	DELAWARE	42	045	42045	Morphine	15	4534	89981
2010	PA	DELAWARE	42	045	42045	Pethidine	1	4534	89981
2010	KY	ADAIR	21	001	21001	Hydrocodone	6	88	29588
2010	PA	ADAMS	42	001	42001	Heroin	14	334	89981
2010	VA	ALBEMARLE	51	003	51003	Codeine	2	282	41462
2010	VA	ALBEMARLE	51	003	51003	Methadone	3	282	41462
2010	VA	ALEXANDRIA CITY	51	510	51510	Buprenorphine	1	427	41462
2010	PA	ALLEGHENY	42	003	42003	Buprenorphine	236	8500	89981
2010	OH	ALLEN	39	003	39003	Heroin	43	580	70999
2010	OH	ALLEN	39	003	39003	Methadone	2	580	70999
2010	VA	AMELIA	51	007	51007	Hydromorphone	1	94	41462
2010	VA	AMHERST	51	009	51009	Hydrocodone	31	411	41462
2010	VA	ARLINGTON	51	013	51013	Buprenorphine	8	610	41462
2010	PA	ARMSTRONG	42	005	42005	Hydrocodone	3	344	89981
2010	OH	ASHLAND	39	005	39005	Hydrocodone	13	766	70999
2010	OH	ASHLAND	39	005	39005	Tramadol	8	766	70999
2010	OH	ASHTABULA	39	007	39007	Methadone	1	571	70999
2010	OH	ATHENS	39	009	39009	Buprenorphine	14	664	70999
2010	KY	BALLARD	21	007	21007	Hydrocodone	1	24	29588
2010	KY	BATH	21	011	21011	Hydromorphone	1	81	29588
2010	PA	BEAVER	42	007	42007	Heroin	87	625	89981
2010	PA	BEAVER	42	007	42007	Methadone	1	625	89981
2010	KY	BELL	21	013	21013	Morphine	4	387	29588
2010	KY	BELL	21	013	21013	Tramadol	4	387	29588
2010	OH	BELMONT	39	013	39013	Propoxyphene	2	231	70999
2010	WV	BERKELEY	54	003	54003	Oxymorphone	1	722	8668
2010	PA	BERKS	42	011	42011	Hydrocodone	13	2146	89981
2010	PA	BERKS	42	011	42011	Oxycodone	26	2146	89981
2010	PA	BLAIR	42	013	42013	Fentanyl	1	662	89981
2010	PA	BLAIR	42	013	42013	Heroin	103	662	89981
2010	PA	BLAIR	42	013	42013	Hydrocodone	17	662	89981
2010	PA	BLAIR	42	013	42013	Methadone	11	662	89981
2010	KY	BOONE	21	015	21015	Codeine	1	299	29588
2010	KY	BOONE	21	015	21015	Oxymorphone	3	299	29588
2010	VA	BOTETOURT	51	023	51023	Fentanyl	1	175	41462
2010	VA	BOTETOURT	51	023	51023	Morphine	10	175	41462
2010	KY	BOURBON	21	017	21017	Buprenorphine	2	161	29588
2010	KY	BOYLE	21	021	21021	Methadone	1	200	29588
2010	WV	BRAXTON	54	007	54007	Oxycodone	17	167	8668
2010	KY	BREATHITT	21	025	21025	Oxycodone	63	162	29588
2010	KY	BRECKINRIDGE	21	027	21027	Hydrocodone	10	78	29588
2010	OH	BROWN	39	015	39015	Buprenorphine	2	213	70999
2010	OH	BROWN	39	015	39015	Propoxyphene	1	213	70999
2010	VA	BRUNSWICK	51	025	51025	Fentanyl	1	131	41462
2010	VA	BUCHANAN	51	027	51027	Codeine	1	185	41462
2010	VA	BUCHANAN	51	027	51027	Methadone	12	185	41462
2010	VA	BUCKINGHAM	51	029	51029	Buprenorphine	1	136	41462
2010	VA	BUCKINGHAM	51	029	51029	Propoxyphene	2	136	41462
2010	PA	BUCKS	42	017	42017	Hydrocodone	63	6140	89981
2010	VA	BUENA VISTA CITY	51	530	51530	Propoxyphene	1	44	41462
2010	OH	BUTLER	39	017	39017	Hydromorphone	2	1825	70999
2010	WV	CABELL	54	011	54011	Heroin	23	517	8668
2010	KY	CALDWELL	21	033	21033	Hydrocodone	8	78	29588
2010	PA	CAMBRIA	42	021	42021	Fentanyl	1	483	89981
2010	PA	CAMBRIA	42	021	42021	Hydromorphone	2	483	89981
2010	KY	CAMPBELL	21	037	21037	Fentanyl	4	852	29588
2010	KY	CAMPBELL	21	037	21037	Morphine	5	852	29588
2010	KY	CAMPBELL	21	037	21037	Tramadol	5	852	29588
2010	VA	CAMPBELL	51	031	51031	Methadone	3	209	41462
2010	PA	CARBON	42	025	42025	Buprenorphine	3	209	89981
2010	KY	CARLISLE	21	039	21039	Morphine	2	26	29588
2010	KY	CARROLL	21	041	21041	Buprenorphine	4	99	29588
2010	OH	CARROLL	39	019	39019	Hydrocodone	8	57	70999
2010	VA	CARROLL	51	035	51035	Codeine	1	166	41462
2010	KY	CASEY	21	045	21045	Oxycodone	14	148	29588
2010	PA	CENTRE	42	027	42027	Fentanyl	2	1028	89981
2010	VA	CHESAPEAKE CITY	51	550	51550	Heroin	119	881	41462
2010	VA	CHESAPEAKE CITY	51	550	51550	Propoxyphene	2	881	41462
2010	PA	CHESTER	42	029	42029	Methadone	9	1979	89981
2010	VA	CHESTERFIELD	51	041	51041	Buprenorphine	10	1331	41462
2010	VA	CHESTERFIELD	51	041	51041	Propoxyphene	1	1331	41462
2010	KY	CHRISTIAN	21	047	21047	Hydrocodone	18	439	29588
2010	KY	CHRISTIAN	21	047	21047	Tramadol	1	439	29588
2010	KY	CLARK	21	049	21049	Buprenorphine	1	214	29588
2010	OH	CLARK	39	023	39023	Buprenorphine	1	186	70999
2010	KY	CLAY	21	051	21051	Methadone	2	208	29588
2010	PA	CLEARFIELD	42	033	42033	Heroin	29	218	89981
2010	OH	CLERMONT	39	025	39025	Hydrocodone	52	752	70999
2010	KY	CLINTON	21	053	21053	Buprenorphine	4	75	29588
2010	PA	CLINTON	42	035	42035	Heroin	8	118	89981
2010	PA	CLINTON	42	035	42035	Methadone	1	118	89981
2010	VA	COLONIAL HEIGHTS CITY	51	570	51570	Hydrocodone	13	190	41462
2010	VA	COLONIAL HEIGHTS CITY	51	570	51570	Tramadol	1	190	41462
2010	OH	COLUMBIANA	39	029	39029	Oxycodone	11	341	70999
2010	OH	COLUMBIANA	39	029	39029	Oxymorphone	2	341	70999
2010	PA	CRAWFORD	42	039	42039	Buprenorphine	3	433	89981
2010	KY	CRITTENDEN	21	055	21055	Oxycodone	2	34	29588
2010	VA	CULPEPER	51	047	51047	Heroin	18	492	41462
2010	VA	CULPEPER	51	047	51047	Methadone	14	492	41462
2010	PA	CUMBERLAND	42	041	42041	Buprenorphine	6	310	89981
2010	VA	DANVILLE CITY	51	590	51590	Morphine	4	332	41462
2010	VA	DANVILLE CITY	51	590	51590	Tramadol	3	332	41462
2010	OH	DEFIANCE	39	039	39039	Fentanyl	1	589	70999
2010	OH	DEFIANCE	39	039	39039	Morphine	15	589	70999
2010	OH	DELAWARE	39	041	39041	Buprenorphine	13	1774	70999
2010	OH	DELAWARE	39	041	39041	Propoxyphene	4	1774	70999
2010	PA	DELAWARE	42	045	42045	Fentanyl	3	4534	89981
2010	PA	DELAWARE	42	045	42045	Hydromorphone	2	4534	89981
2010	PA	DELAWARE	42	045	42045	Methadone	29	4534	89981
2010	WV	DODDRIDGE	54	017	54017	Hydrocodone	6	16	8668
2010	KY	ELLIOTT	21	063	21063	Oxycodone	72	91	29588
2010	OH	ERIE	39	043	39043	Heroin	30	552	70999
2010	OH	ADAMS	39	001	39001	Codeine	3	527	70999
2010	OH	ADAMS	39	001	39001	Hydrocodone	59	527	70999
2010	OH	ADAMS	39	001	39001	Methadone	12	527	70999
2010	PA	ADAMS	42	001	42001	Hydromorphone	1	334	89981
2010	VA	ALBEMARLE	51	003	51003	Buprenorphine	1	282	41462
2010	VA	ALEXANDRIA CITY	51	510	51510	Hydrocodone	3	427	41462
2010	VA	ALLEGHANY	51	005	51005	Buprenorphine	1	154	41462
2010	VA	ALLEGHANY	51	005	51005	Morphine	5	154	41462
2010	PA	ALLEGHENY	42	003	42003	Dihydrocodeine	1	8500	89981
2010	PA	ALLEGHENY	42	003	42003	Methorphan	2	8500	89981
2010	PA	ALLEGHENY	42	003	42003	Oxymorphone	16	8500	89981
2010	KY	ALLEN	21	003	21003	Hydrocodone	10	168	29588
2010	KY	ALLEN	21	003	21003	Methadone	4	168	29588
2010	OH	ALLEN	39	003	39003	Hydromorphone	15	580	70999
2010	VA	ARLINGTON	51	013	51013	Codeine	3	610	41462
2010	VA	ARLINGTON	51	013	51013	Hydrocodone	7	610	41462
2010	OH	ASHLAND	39	005	39005	Buprenorphine	12	766	70999
2010	OH	ASHLAND	39	005	39005	Morphine	6	766	70999
2010	OH	ASHTABULA	39	007	39007	Heroin	26	571	70999
2010	OH	ASHTABULA	39	007	39007	Propoxyphene	1	571	70999
2010	OH	ATHENS	39	009	39009	Hydrocodone	40	664	70999
2010	OH	ATHENS	39	009	39009	Methadone	9	664	70999
2010	WV	BARBOUR	54	001	54001	Buprenorphine	1	16	8668
2010	PA	BEAVER	42	007	42007	Buprenorphine	6	625	89981
2010	PA	BEAVER	42	007	42007	Morphine	1	625	89981
2010	PA	BEDFORD	42	009	42009	Heroin	34	150	89981
2010	VA	BEDFORD	51	019	51019	Oxycodone	6	177	41462
2010	VA	BEDFORD CITY	51	515	51515	Hydrocodone	1	4	41462
2010	WV	BERKELEY	54	003	54003	Methorphan	1	722	8668
2010	PA	BLAIR	42	013	42013	Buprenorphine	18	662	89981
2010	PA	BLAIR	42	013	42013	Morphine	14	662	89981
2010	WV	BOONE	54	005	54005	Oxycodone	22	90	8668
2010	VA	BOTETOURT	51	023	51023	Heroin	20	175	41462
2010	KY	BOURBON	21	017	21017	Methadone	2	161	29588
2010	KY	BOYD	21	019	21019	Buprenorphine	10	504	29588
2010	KY	BOYD	21	019	21019	Morphine	9	504	29588
2010	KY	BOYD	21	019	21019	Tramadol	2	504	29588
2010	PA	BRADFORD	42	015	42015	Heroin	33	145	89981
2010	WV	BRAXTON	54	007	54007	Morphine	7	167	8668
2010	VA	BRISTOL	51	520	51520	Hydromorphone	3	276	41462
2010	OH	BROWN	39	015	39015	Codeine	1	213	70999
2010	OH	BROWN	39	015	39015	Hydrocodone	21	213	70999
2010	VA	BRUNSWICK	51	025	51025	Heroin	4	131	41462
2010	PA	BUCKS	42	017	42017	Buprenorphine	120	6140	89981
2010	PA	BUCKS	42	017	42017	Morphine	27	6140	89981
2010	OH	BUTLER	39	017	39017	Oxycodone	127	1825	70999
2010	OH	BUTLER	39	017	39017	Oxymorphone	12	1825	70999
2010	PA	BUTLER	42	019	42019	Buprenorphine	12	310	89981
2010	PA	BUTLER	42	019	42019	Morphine	2	310	89981
2010	WV	CABELL	54	011	54011	Buprenorphine	3	517	8668
2010	WV	CABELL	54	011	54011	Morphine	8	517	8668
2010	KY	CALDWELL	21	033	21033	Morphine	2	78	29588
2010	PA	CAMBRIA	42	021	42021	Propoxyphene	3	483	89981
2010	PA	CAMERON	42	023	42023	Hydrocodone	1	7	89981
2010	KY	CAMPBELL	21	037	21037	Oxycodone	72	852	29588
2010	KY	CAMPBELL	21	037	21037	Oxymorphone	1	852	29588
2010	KY	CARLISLE	21	039	21039	Hydrocodone	2	26	29588
2010	VA	CAROLINE	51	033	51033	Heroin	5	138	41462
2010	VA	CARROLL	51	035	51035	Buprenorphine	6	166	41462
2010	VA	CARROLL	51	035	51035	Morphine	3	166	41462
2010	KY	CARTER	21	043	21043	Heroin	1	354	29588
2010	PA	CENTRE	42	027	42027	Oxycodone	23	1028	89981
2010	VA	CHARLOTTESVILLE CITY	51	540	51540	Hydrocodone	4	264	41462
2010	PA	CHESTER	42	029	42029	Buprenorphine	11	1979	89981
2010	VA	CHESTERFIELD	51	041	51041	Hydrocodone	39	1331	41462
2010	VA	CHESTERFIELD	51	041	51041	Tramadol	3	1331	41462
2010	PA	CLARION	42	031	42031	Hydrocodone	3	221	89981
2010	KY	CLARK	21	049	21049	Oxymorphone	1	214	29588
2010	OH	CLARK	39	023	39023	Heroin	26	186	70999
2010	PA	CLEARFIELD	42	033	42033	Tramadol	1	218	89981
2010	OH	CLERMONT	39	025	39025	Buprenorphine	19	752	70999
2010	OH	CLERMONT	39	025	39025	Morphine	4	752	70999
2010	OH	CLINTON	39	027	39027	Heroin	68	455	70999
2010	VA	COLONIAL HEIGHTS CITY	51	570	51570	Oxycodone	9	190	41462
2010	PA	COLUMBIA	42	037	42037	Hydrocodone	4	131	89981
2010	OH	COLUMBIANA	39	029	39029	Hydrocodone	9	341	70999
2010	OH	CRAWFORD	39	033	39033	Hydrocodone	6	218	70999
2010	KY	CRITTENDEN	21	055	21055	Methadone	2	34	29588
2010	VA	CULPEPER	51	047	51047	Hydromorphone	11	492	41462
2010	OH	CUYAHOGA	39	035	39035	Hydrocodone	81	3556	70999
2010	OH	CUYAHOGA	39	035	39035	Methadone	13	3556	70999
2010	VA	DANVILLE CITY	51	590	51590	Oxymorphone	1	332	41462
2010	OH	DARKE	39	037	39037	Oxycodone	1	156	70999
2010	PA	DAUPHIN	42	043	42043	Oxycodone	37	2575	89981
2010	PA	DAUPHIN	42	043	42043	Oxymorphone	2	2575	89981
2010	KY	DAVIESS	21	059	21059	Fentanyl	1	591	29588
2010	OH	DEFIANCE	39	039	39039	Oxycodone	31	589	70999
2010	OH	DEFIANCE	39	039	39039	Oxymorphone	2	589	70999
2010	OH	DELAWARE	39	041	39041	Opiates	2	1774	70999
2010	PA	DELAWARE	42	045	42045	Oxycodone	337	4534	89981
2010	PA	DELAWARE	42	045	42045	Oxymorphone	6	4534	89981
2010	PA	ELK	42	047	42047	Heroin	2	123	89981
2010	OH	ERIE	39	043	39043	Morphine	1	552	70999
2010	VA	FAIRFAX	51	059	51059	Buprenorphine	21	3337	41462
2010	OH	FAIRFIELD	39	045	39045	Hydromorphone	1	846	70999
2010	OH	FAIRFIELD	39	045	39045	Opiates	1	846	70999
2010	VA	FALLS CHURCH CITY	51	610	51610	Buprenorphine	1	65	41462
2010	KY	FAYETTE	21	067	21067	Codeine	5	1967	29588
2010	KY	FAYETTE	21	067	21067	Heroin	32	1967	29588
2010	KY	FAYETTE	21	067	21067	Methadone	23	1967	29588
2010	OH	ADAMS	39	001	39001	Hydromorphone	4	527	70999
2010	OH	ADAMS	39	001	39001	Meperidine	1	527	70999
2010	PA	ADAMS	42	001	42001	Buprenorphine	2	334	89981
2010	PA	ADAMS	42	001	42001	Hydrocodone	1	334	89981
2010	VA	ALEXANDRIA CITY	51	510	51510	Hydromorphone	1	427	41462
2010	VA	ALLEGHANY	51	005	51005	Oxycodone	6	154	41462
2010	PA	ALLEGHENY	42	003	42003	Hydrocodone	198	8500	89981
2010	PA	ALLEGHENY	42	003	42003	Tramadol	16	8500	89981
2010	OH	ALLEN	39	003	39003	Buprenorphine	1	580	70999
2010	OH	ALLEN	39	003	39003	Codeine	2	580	70999
2010	OH	ALLEN	39	003	39003	Hydrocodone	20	580	70999
2010	OH	ALLEN	39	003	39003	Morphine	3	580	70999
2010	VA	AMELIA	51	007	51007	Buprenorphine	2	94	41462
2010	VA	ARLINGTON	51	013	51013	Hydromorphone	3	610	41462
2010	PA	ARMSTRONG	42	005	42005	Heroin	96	344	89981
2010	PA	ARMSTRONG	42	005	42005	Propoxyphene	1	344	89981
2010	OH	ATHENS	39	009	39009	Meperidine	2	664	70999
2010	OH	AUGLAIZE	39	011	39011	Morphine	7	184	70999
2010	VA	AUGUSTA	51	015	51015	Hydrocodone	13	344	41462
2010	VA	AUGUSTA	51	015	51015	Tramadol	2	344	41462
2010	KY	BARREN	21	009	21009	Tramadol	2	383	29588
2010	VA	BATH	51	017	51017	Hydrocodone	12	40	41462
2010	PA	BEAVER	42	007	42007	Oxycodone	16	625	89981
2010	PA	BEAVER	42	007	42007	Propoxyphene	1	625	89981
2010	VA	BEDFORD	51	019	51019	Hydrocodone	17	177	41462
2010	VA	BEDFORD	51	019	51019	Morphine	6	177	41462
2010	VA	BEDFORD	51	019	51019	Tramadol	4	177	41462
2010	KY	BELL	21	013	21013	Methadone	4	387	29588
2010	OH	BELMONT	39	013	39013	Fentanyl	2	231	70999
2010	OH	BELMONT	39	013	39013	Hydrocodone	10	231	70999
2010	PA	BLAIR	42	013	42013	Oxycodone	64	662	89981
2010	PA	BLAIR	42	013	42013	Oxymorphone	1	662	89981
2010	VA	BLAND	51	021	51021	Methadone	1	25	41462
2010	KY	BOONE	21	015	21015	Hydrocodone	19	299	29588
2010	WV	BOONE	54	005	54005	Morphine	1	90	8668
2010	KY	BRACKEN	21	023	21023	Hydrocodone	4	28	29588
2010	VA	BRISTOL	51	520	51520	Buprenorphine	20	276	41462
2010	VA	BUCKINGHAM	51	029	51029	Morphine	2	136	41462
2010	PA	BUCKS	42	017	42017	Oxycodone	506	6140	89981
2010	PA	BUCKS	42	017	42017	Oxymorphone	1	6140	89981
2010	KY	BULLITT	21	029	21029	Methadone	9	316	29588
2010	PA	BUTLER	42	019	42019	Hydrocodone	6	310	89981
2010	KY	CALDWELL	21	033	21033	Oxycodone	1	78	29588
2010	KY	CALLOWAY	21	035	21035	Hydrocodone	2	97	29588
2010	KY	CAMPBELL	21	037	21037	Hydrocodone	34	852	29588
2010	VA	CAMPBELL	51	031	51031	Hydrocodone	3	209	41462
2010	VA	CAMPBELL	51	031	51031	Tramadol	1	209	41462
2010	PA	CARBON	42	025	42025	Methadone	3	209	89981
2010	KY	CARROLL	21	041	21041	Morphine	1	99	29588
2010	VA	CARROLL	51	035	51035	Oxycodone	10	166	41462
2010	VA	CARROLL	51	035	51035	Oxymorphone	1	166	41462
2010	KY	CASEY	21	045	21045	Methadone	2	148	29588
2010	PA	CENTRE	42	027	42027	Hydrocodone	5	1028	89981
2010	OH	CHAMPAIGN	39	021	39021	Oxycodone	19	214	70999
2010	OH	CHAMPAIGN	39	021	39021	Oxymorphone	1	214	70999
2010	PA	CHESTER	42	029	42029	Hydromorphone	1	1979	89981
2010	VA	CHESTERFIELD	51	041	51041	Oxycodone	69	1331	41462
2010	KY	CLARK	21	049	21049	Oxycodone	142	214	29588
2010	KY	CLAY	21	051	21051	Buprenorphine	8	208	29588
2010	KY	CLAY	21	051	21051	Codeine	1	208	29588
2010	KY	CLAY	21	051	21051	Hydrocodone	31	208	29588
2010	KY	CLAY	21	051	21051	Tramadol	3	208	29588
2010	OH	CLERMONT	39	025	39025	Dextropropoxyphene	1	752	70999
2010	OH	CLERMONT	39	025	39025	Oxycodone	78	752	70999
2010	OH	CLERMONT	39	025	39025	Oxymorphone	5	752	70999
2010	OH	CLINTON	39	027	39027	Dextropropoxyphene	1	455	70999
2010	PA	CLINTON	42	035	42035	Buprenorphine	1	118	89981
2010	PA	CLINTON	42	035	42035	Hydrocodone	1	118	89981
2010	VA	COLONIAL HEIGHTS CITY	51	570	51570	Heroin	13	190	41462
2010	VA	CRAIG	51	045	51045	Oxycodone	4	69	41462
2010	OH	CRAWFORD	39	033	39033	Oxycodone	16	218	70999
2010	PA	CRAWFORD	42	039	42039	Hydromorphone	2	433	89981
2010	VA	CULPEPER	51	047	51047	Buprenorphine	1	492	41462
2010	VA	CULPEPER	51	047	51047	Hydrocodone	11	492	41462
2010	VA	CULPEPER	51	047	51047	Tramadol	3	492	41462
2010	PA	CUMBERLAND	42	041	42041	Fentanyl	1	310	89981
2010	PA	CUMBERLAND	42	041	42041	Hydrocodone	2	310	89981
2010	OH	CUYAHOGA	39	035	39035	Hydromorphone	3	3556	70999
2010	VA	DANVILLE CITY	51	590	51590	Hydrocodone	17	332	41462
2010	OH	DELAWARE	39	041	39041	Heroin	1123	1774	70999
2010	OH	DELAWARE	39	041	39041	Methadone	10	1774	70999
2010	VA	DINWIDDIE	51	053	51053	Methadone	2	131	41462
2010	KY	EDMONSON	21	061	21061	Propoxyphene	1	78	29588
2010	PA	ELK	42	047	42047	Methadone	1	123	89981
2010	KY	ELLIOTT	21	063	21063	Hydrocodone	12	91	29588
2010	VA	EMPORIA CITY	51	595	51595	Heroin	3	91	41462
2010	OH	ERIE	39	043	39043	Codeine	3	552	70999
2010	PA	ERIE	42	049	42049	Heroin	62	1570	89981
2010	PA	ERIE	42	049	42049	Propoxyphene	1	1570	89981
2010	PA	ERIE	42	049	42049	Tramadol	1	1570	89981
2010	VA	ESSEX	51	057	51057	Oxycodone	1	94	41462
2010	VA	FAIRFAX	51	059	51059	Hydromorphone	19	3337	41462
2010	VA	FAIRFAX	51	059	51059	Opium	1	3337	41462
2010	OH	FAIRFIELD	39	045	39045	Buprenorphine	16	846	70999
2010	OH	FAIRFIELD	39	045	39045	Codeine	1	846	70999
2010	OH	FAIRFIELD	39	045	39045	Hydrocodone	24	846	70999
2010	OH	FAIRFIELD	39	045	39045	Morphine	3	846	70999
2010	VA	FALLS CHURCH CITY	51	610	51610	Oxycodone	1	65	41462
2010	VA	FAUQUIER	51	061	51061	Pentazocine	2	418	41462
2010	KY	FAYETTE	21	067	21067	Propoxyphene	1	1967	29588
2010	VA	ACCOMACK	51	001	51001	Morphine	1	84	41462
2010	OH	ADAMS	39	001	39001	Oxycodone	119	527	70999
2010	OH	ADAMS	39	001	39001	Oxymorphone	1	527	70999
2010	PA	ADAMS	42	001	42001	Fentanyl	2	334	89981
2010	VA	ALLEGHANY	51	005	51005	Propoxyphene	1	154	41462
2010	PA	ALLEGHENY	42	003	42003	Codeine	2	8500	89981
2010	PA	ALLEGHENY	42	003	42003	Heroin	2592	8500	89981
2010	PA	ALLEGHENY	42	003	42003	Methadone	34	8500	89981
2010	VA	AMHERST	51	009	51009	Oxycodone	15	411	41462
2010	KY	ANDERSON	21	005	21005	Oxycodone	21	98	29588
2010	VA	APPOMATTOX	51	011	51011	Hydrocodone	2	39	41462
2010	VA	APPOMATTOX	51	011	51011	Oxycodone	1	39	41462
2010	VA	ARLINGTON	51	013	51013	Methadone	2	610	41462
2010	PA	ARMSTRONG	42	005	42005	Buprenorphine	16	344	89981
2010	PA	ARMSTRONG	42	005	42005	Morphine	1	344	89981
2010	OH	ASHTABULA	39	007	39007	Oxycodone	42	571	70999
2010	VA	AUGUSTA	51	015	51015	Morphine	5	344	41462
2010	KY	BARREN	21	009	21009	Oxymorphone	1	383	29588
2010	KY	BATH	21	011	21011	Oxycodone	42	81	29588
2010	VA	BATH	51	017	51017	Fentanyl	3	40	41462
2010	VA	BATH	51	017	51017	Morphine	1	40	41462
2010	PA	BEDFORD	42	009	42009	Oxycodone	3	150	89981
2010	VA	BEDFORD	51	019	51019	Heroin	3	177	41462
2010	VA	BEDFORD	51	019	51019	Methadone	1	177	41462
2010	KY	BELL	21	013	21013	Codeine	1	387	29588
2010	KY	BELL	21	013	21013	Hydrocodone	83	387	29588
2010	OH	BELMONT	39	013	39013	Buprenorphine	1	231	70999
2010	OH	BELMONT	39	013	39013	Morphine	3	231	70999
2010	WV	BERKELEY	54	003	54003	Morphine	2	722	8668
2010	VA	BLAND	51	021	51021	Buprenorphine	1	25	41462
2010	KY	BOONE	21	015	21015	Buprenorphine	10	299	29588
2010	KY	BOONE	21	015	21015	Morphine	1	299	29588
2010	WV	BOONE	54	005	54005	Hydrocodone	14	90	8668
2010	VA	BOTETOURT	51	023	51023	Oxycodone	12	175	41462
2010	VA	BOTETOURT	51	023	51023	Oxymorphone	1	175	41462
2010	KY	BOYLE	21	021	21021	Buprenorphine	7	200	29588
2010	PA	BRADFORD	42	015	42015	Oxycodone	22	145	89981
2010	WV	BRAXTON	54	007	54007	Hydromorphone	1	167	8668
2010	KY	BRECKINRIDGE	21	027	21027	Oxycodone	2	78	29588
2010	VA	BRISTOL	51	520	51520	Hydrocodone	26	276	41462
2010	VA	BRISTOL	51	520	51520	Methadone	7	276	41462
2010	OH	BROWN	39	015	39015	Methadone	4	213	70999
2010	VA	BRUNSWICK	51	025	51025	Oxycodone	2	131	41462
2010	VA	BUCHANAN	51	027	51027	Buprenorphine	8	185	41462
2010	VA	BUCKINGHAM	51	029	51029	Hydrocodone	2	136	41462
2010	PA	BUCKS	42	017	42017	Meperidine	4	6140	89981
2010	KY	BULLITT	21	029	21029	Hydrocodone	41	316	29588
2010	KY	BUTLER	21	031	21031	Hydrocodone	3	102	29588
2010	KY	BUTLER	21	031	21031	Methadone	1	102	29588
2010	OH	BUTLER	39	017	39017	Heroin	223	1825	70999
2010	KY	CALLOWAY	21	035	21035	Morphine	1	97	29588
2010	PA	CAMBRIA	42	021	42021	Buprenorphine	14	483	89981
2010	PA	CAMBRIA	42	021	42021	Morphine	10	483	89981
2010	KY	CAMPBELL	21	037	21037	Heroin	86	852	29588
2010	KY	CAMPBELL	21	037	21037	Propoxyphene	1	852	29588
2010	VA	CAMPBELL	51	031	51031	Morphine	3	209	41462
2010	PA	CARBON	42	025	42025	Hydrocodone	5	209	89981
2010	KY	CARROLL	21	041	21041	Hydrocodone	9	99	29588
2010	KY	CARROLL	21	041	21041	Methadone	3	99	29588
2010	OH	CARROLL	39	019	39019	Propoxyphene	1	57	70999
2010	KY	CASEY	21	045	21045	Hydrocodone	32	148	29588
2010	KY	CASEY	21	045	21045	Tramadol	1	148	29588
2010	PA	CENTRE	42	027	42027	Codeine	1	1028	89981
2010	PA	CENTRE	42	027	42027	Heroin	23	1028	89981
2010	VA	CHARLOTTE	51	037	51037	Oxycodone	5	75	41462
2010	VA	CHARLOTTESVILLE CITY	51	540	51540	Methadone	1	264	41462
2010	VA	CHESAPEAKE CITY	51	550	51550	Hydromorphone	5	881	41462
2010	VA	CHESAPEAKE CITY	51	550	51550	Meperidine	1	881	41462
2010	VA	CHESAPEAKE CITY	51	550	51550	Tramadol	2	881	41462
2010	PA	CHESTER	42	029	42029	Morphine	3	1979	89981
2010	VA	CHESTERFIELD	51	041	51041	Meperidine	3	1331	41462
2010	KY	CHRISTIAN	21	047	21047	Buprenorphine	2	439	29588
2010	VA	CLARKE	51	043	51043	Oxycodone	2	35	41462
2010	PA	CLEARFIELD	42	033	42033	Fentanyl	1	218	89981
2010	PA	CLEARFIELD	42	033	42033	Hydromorphone	1	218	89981
2010	OH	CLERMONT	39	025	39025	Tramadol	3	752	70999
2010	KY	CLINTON	21	053	21053	Oxycodone	7	75	29588
2010	OH	CLINTON	39	027	39027	Oxycodone	33	455	70999
2010	OH	COSHOCTON	39	031	39031	Tramadol	1	75	70999
2010	OH	CRAWFORD	39	033	39033	Methadone	4	218	70999
2010	PA	CRAWFORD	42	039	42039	Heroin	6	433	89981
2010	VA	CULPEPER	51	047	51047	Morphine	8	492	41462
2010	PA	CUMBERLAND	42	041	42041	Heroin	32	310	89981
2010	VA	CUMBERLAND	51	049	51049	Tramadol	2	64	41462
2010	VA	DANVILLE CITY	51	590	51590	Heroin	3	332	41462
2010	OH	DARKE	39	037	39037	Heroin	20	156	70999
2010	OH	DARKE	39	037	39037	Methadone	2	156	70999
2010	PA	DAUPHIN	42	043	42043	Heroin	266	2575	89981
2010	PA	DAUPHIN	42	043	42043	Methadone	12	2575	89981
2010	KY	DAVIESS	21	059	21059	Morphine	6	591	29588
2010	OH	DEFIANCE	39	039	39039	Heroin	24	589	70999
2010	OH	DEFIANCE	39	039	39039	Propoxyphene	2	589	70999
2010	OH	DELAWARE	39	041	39041	Codeine	3	1774	70999
2010	OH	DELAWARE	39	041	39041	Hydrocodone	22	1774	70999
2010	OH	DELAWARE	39	041	39041	Tramadol	1	1774	70999
2010	PA	DELAWARE	42	045	42045	Heroin	344	4534	89981
2010	PA	DELAWARE	42	045	42045	Propoxyphene	5	4534	89981
2010	KY	EDMONSON	21	061	21061	Hydrocodone	9	78	29588
2010	PA	ELK	42	047	42047	Codeine	1	123	89981
2010	KY	ELLIOTT	21	063	21063	Morphine	1	91	29588
2010	VA	EMPORIA CITY	51	595	51595	Buprenorphine	1	91	41462
2010	OH	FAIRFIELD	39	045	39045	Propoxyphene	2	846	70999
2010	VA	FALLS CHURCH CITY	51	610	51610	Hydrocodone	1	65	41462
2010	VA	FAUQUIER	51	061	51061	Oxycodone	41	418	41462
2010	VA	FAUQUIER	51	061	51061	Oxymorphone	5	418	41462
2010	KY	FAYETTE	21	067	21067	Buprenorphine	31	1967	29588
2010	OH	FAYETTE	39	047	39047	Heroin	8	95	70999
2010	PA	FAYETTE	42	051	42051	Heroin	67	859	89981
2010	PA	FAYETTE	42	051	42051	Methadone	4	859	89981
2010	KY	FLOYD	21	071	21071	Codeine	1	306	29588
2010	VA	FLOYD	51	063	51063	Codeine	1	78	41462
2010	VA	FLUVANNA	51	065	51065	Heroin	1	50	41462
2010	KY	FRANKLIN	21	073	21073	Codeine	2	430	29588
2010	KY	FRANKLIN	21	073	21073	Methorphan	2	430	29588
2010	OH	FRANKLIN	39	049	39049	Buprenorphine	29	2921	70999
2010	PA	FRANKLIN	42	055	42055	Heroin	41	755	89981
2010	VA	FRANKLIN	51	067	51067	Buprenorphine	2	255	41462
2010	VA	FREDERICK	51	069	51069	Buprenorphine	7	401	41462
2010	KY	FULTON	21	075	21075	Tramadol	3	74	29588
2010	PA	FULTON	42	057	42057	Codeine	1	122	89981
2010	PA	FULTON	42	057	42057	Oxycodone	18	122	89981
2010	VA	GALAX CITY	51	640	51640	Tramadol	1	31	41462
2010	OH	GALLIA	39	053	39053	Hydrocodone	59	416	70999
2010	OH	GEAUGA	39	055	39055	Buprenorphine	3	114	70999
2010	OH	GEAUGA	39	055	39055	Propoxyphene	1	114	70999
2010	VA	GILES	51	071	51071	Oxycodone	90	241	41462
2010	VA	GLOUCESTER	51	073	51073	Hydrocodone	5	133	41462
2010	VA	GOOCHLAND	51	075	51075	Oxycodone	8	49	41462
2010	KY	GRANT	21	081	21081	Methadone	2	133	29588
2010	WV	GRANT	54	023	54023	Heroin	2	95	8668
2010	KY	GRAVES	21	083	21083	Hydrocodone	10	217	29588
2010	KY	GRAVES	21	083	21083	Oxycodone	3	217	29588
2010	KY	GRAYSON	21	085	21085	Buprenorphine	3	257	29588
2010	KY	GRAYSON	21	085	21085	Propoxyphene	1	257	29588
2010	VA	GRAYSON	51	077	51077	Hydrocodone	9	103	41462
2010	VA	GRAYSON	51	077	51077	Oxycodone	9	103	41462
2010	WV	GREENBRIER	54	025	54025	Morphine	3	254	8668
2010	OH	GREENE	39	057	39057	Hydromorphone	1	964	70999
2010	OH	GREENE	39	057	39057	Methadone	3	964	70999
2010	PA	GREENE	42	059	42059	Oxycodone	3	179	89981
2010	VA	GREENE	51	079	51079	Hydrocodone	4	102	41462
2010	OH	GUERNSEY	39	059	39059	Buprenorphine	6	316	70999
2010	VA	HALIFAX	51	083	51083	Hydromorphone	9	277	41462
2010	VA	HALIFAX	51	083	51083	Morphine	2	277	41462
2010	OH	HAMILTON	39	061	39061	Heroin	1917	13780	70999
2010	OH	HAMILTON	39	061	39061	Methadone	68	13780	70999
2010	VA	HAMPTON CITY	51	650	51650	Tramadol	1	775	41462
2010	OH	HANCOCK	39	063	39063	Buprenorphine	5	573	70999
2010	VA	HANOVER	51	085	51085	Buprenorphine	5	510	41462
2010	OH	HARDIN	39	065	39065	Codeine	2	326	70999
2010	WV	HARDY	54	031	54031	Oxycodone	4	76	8668
2010	WV	HARRISON	54	033	54033	Hydromorphone	2	196	8668
2010	VA	HARRISONBURG CITY	51	660	51660	Oxycodone	1	48	41462
2010	VA	HARRISONBURG CITY	51	660	51660	Oxymorphone	1	48	41462
2010	KY	HART	21	099	21099	Hydrocodone	1	76	29588
2010	KY	HENDERSON	21	101	21101	Oxycodone	5	222	29588
2010	VA	HENRICO	51	087	51087	Oxycodone	49	1154	41462
2010	VA	HENRY	51	089	51089	Fentanyl	1	164	41462
2010	OH	HOLMES	39	075	39075	Oxycodone	5	129	70999
2010	KY	HOPKINS	21	107	21107	Hydrocodone	33	249	29588
2010	KY	HOPKINS	21	107	21107	Oxycodone	9	249	29588
2010	PA	HUNTINGDON	42	061	42061	Oxycodone	18	174	89981
2010	PA	HUNTINGDON	42	061	42061	Oxymorphone	1	174	89981
2010	OH	HURON	39	077	39077	Heroin	38	240	70999
2010	PA	INDIANA	42	063	42063	Hydrocodone	5	604	89981
2010	OH	JACKSON	39	079	39079	Propoxyphene	1	632	70999
2010	WV	JACKSON	54	035	54035	Hydrocodone	2	116	8668
2010	VA	JAMES CITY	51	095	51095	Oxycodone	4	237	41462
2010	KY	JEFFERSON	21	111	21111	Fentanyl	2	5426	29588
2010	KY	JEFFERSON	21	111	21111	Hydromorphone	7	5426	29588
2010	KY	JEFFERSON	21	111	21111	Methadone	45	5426	29588
2010	OH	JEFFERSON	39	081	39081	Hydrocodone	4	264	70999
2010	OH	JEFFERSON	39	081	39081	Oxycodone	16	264	70999
2010	PA	JEFFERSON	42	065	42065	Buprenorphine	4	200	89981
2010	WV	JEFFERSON	54	037	54037	Buprenorphine	4	133	8668
2010	KY	JOHNSON	21	115	21115	Buprenorphine	2	243	29588
2010	KY	KENTON	21	117	21117	Fentanyl	1	1073	29588
2010	KY	KENTON	21	117	21117	Hydromorphone	1	1073	29588
2010	KY	KENTON	21	117	21117	Morphine	14	1073	29588
2010	KY	KENTON	21	117	21117	Tramadol	5	1073	29588
2010	VA	KING GEORGE	51	099	51099	Morphine	2	128	41462
2010	VA	KING WILLIAM	51	101	51101	Buprenorphine	1	48	41462
2010	KY	KNOTT	21	119	21119	Hydrocodone	61	284	29588
2010	KY	KNOTT	21	119	21119	Tramadol	4	284	29588
2010	KY	KNOX	21	121	21121	Hydrocodone	70	483	29588
2010	KY	KNOX	21	121	21121	Tramadol	3	483	29588
2010	OH	KNOX	39	083	39083	Morphine	2	31	70999
2010	PA	LACKAWANNA	42	069	42069	Morphine	3	1123	89981
2010	OH	LAKE	39	085	39085	Tramadol	29	2726	70999
2010	PA	LANCASTER	42	071	42071	Morphine	4	1683	89981
2010	KY	LAUREL	21	125	21125	Methadone	8	623	29588
2010	PA	LEBANON	42	075	42075	Codeine	1	648	89981
2010	PA	LEHIGH	42	077	42077	Hydrocodone	8	2385	89981
2010	OH	LICKING	39	089	39089	Heroin	175	1639	70999
2010	OH	LICKING	39	089	39089	Propoxyphene	2	1639	70999
2010	KY	LOGAN	21	141	21141	Fentanyl	1	111	29588
2010	OH	LOGAN	39	091	39091	Buprenorphine	1	273	70999
2010	WV	LOGAN	54	045	54045	Buprenorphine	11	307	8668
2010	VA	LOUDOUN	51	107	51107	Heroin	39	902	41462
2010	VA	LOUISA	51	109	51109	Heroin	5	184	41462
2010	VA	LOUISA	51	109	51109	Methadone	2	184	41462
2010	VA	FAIRFAX	51	059	51059	Oxymorphone	1	3337	41462
2010	VA	FAIRFAX CITY	51	600	51600	Heroin	20	148	41462
2010	VA	FAIRFAX CITY	51	600	51600	Oxycodone	12	148	41462
2010	OH	FAIRFIELD	39	045	39045	Oxycodone	78	846	70999
2010	VA	FAUQUIER	51	061	51061	Buprenorphine	1	418	41462
2010	PA	FAYETTE	42	051	42051	Hydrocodone	42	859	89981
2010	PA	FAYETTE	42	051	42051	Tramadol	1	859	89981
2010	KY	FLEMING	21	069	21069	Methadone	3	88	29588
2010	KY	FLOYD	21	071	21071	Oxycodone	82	306	29588
2010	VA	FLOYD	51	063	51063	Oxycodone	7	78	41462
2010	KY	FRANKLIN	21	073	21073	Oxycodone	64	430	29588
2010	OH	FRANKLIN	39	049	39049	Hydrocodone	60	2921	70999
2010	OH	FRANKLIN	39	049	39049	Oxycodone	346	2921	70999
2010	OH	FRANKLIN	39	049	39049	Oxymorphone	4	2921	70999
2010	OH	FRANKLIN	39	049	39049	Tramadol	1	2921	70999
2010	PA	FRANKLIN	42	055	42055	Hydrocodone	9	755	89981
2010	VA	FRANKLIN CITY	51	620	51620	Hydrocodone	2	64	41462
2010	VA	FREDERICKSBURG CITY	51	630	51630	Oxycodone	28	234	41462
2010	VA	FREDERICKSBURG CITY	51	630	51630	Oxymorphone	1	234	41462
2010	OH	FULTON	39	051	39051	Methadone	1	65	70999
2010	KY	GARRARD	21	079	21079	Methadone	2	77	29588
2010	OH	GEAUGA	39	055	39055	Oxycodone	13	114	70999
2010	VA	GILES	51	071	51071	Methadone	7	241	41462
2010	VA	GLOUCESTER	51	073	51073	Heroin	13	133	41462
2010	WV	GRANT	54	023	54023	Hydrocodone	10	95	8668
2010	KY	GREEN	21	087	21087	Buprenorphine	1	59	29588
2010	KY	GREEN	21	087	21087	Hydrocodone	3	59	29588
2010	WV	GREENBRIER	54	025	54025	Hydromorphone	2	254	8668
2010	PA	GREENE	42	059	42059	Buprenorphine	5	179	89981
2010	VA	GREENSVILLE	51	081	51081	Heroin	1	112	41462
2010	VA	GREENSVILLE	51	081	51081	Oxycodone	14	112	41462
2010	KY	GREENUP	21	089	21089	Morphine	3	108	29588
2010	OH	GUERNSEY	39	059	39059	Hydrocodone	15	316	70999
2010	OH	HAMILTON	39	061	39061	Hydrocodone	347	13780	70999
2010	OH	HAMILTON	39	061	39061	Tramadol	25	13780	70999
2010	VA	HAMPTON CITY	51	650	51650	Codeine	3	775	41462
2010	WV	HANCOCK	54	029	54029	Heroin	79	152	8668
2010	VA	HANOVER	51	085	51085	Oxycodone	39	510	41462
2010	VA	HANOVER	51	085	51085	Oxymorphone	1	510	41462
2010	VA	HANOVER	51	085	51085	Tramadol	4	510	41462
2010	OH	HARDIN	39	065	39065	Oxycodone	46	326	70999
2010	OH	HARDIN	39	065	39065	Oxymorphone	1	326	70999
2010	WV	HARDY	54	031	54031	Buprenorphine	1	76	8668
2010	KY	HARLAN	21	095	21095	Methadone	7	419	29588
2010	KY	HARRISON	21	097	21097	Morphine	7	106	29588
2010	WV	HARRISON	54	033	54033	Methadone	1	196	8668
2010	VA	HENRICO	51	087	51087	Buprenorphine	10	1154	41462
2010	VA	HENRICO	51	087	51087	Codeine	3	1154	41462
2010	KY	HENRY	21	103	21103	Oxycodone	2	19	29588
2010	OH	HIGHLAND	39	071	39071	Hydrocodone	20	527	70999
2010	OH	HIGHLAND	39	071	39071	Morphine	7	527	70999
2010	OH	HOLMES	39	075	39075	Buprenorphine	1	129	70999
2010	VA	HOPEWELL CITY	51	670	51670	Hydromorphone	1	215	41462
2010	KY	HOPKINS	21	107	21107	Heroin	1	249	29588
2010	PA	HUNTINGDON	42	061	42061	Buprenorphine	6	174	89981
2010	OH	HURON	39	077	39077	Oxycodone	33	240	70999
2010	PA	INDIANA	42	063	42063	Heroin	159	604	89981
2010	KY	JACKSON	21	109	21109	Propoxyphene	1	145	29588
2010	KY	JACKSON	21	109	21109	Tramadol	3	145	29588
2010	OH	JACKSON	39	079	39079	Heroin	35	632	70999
2010	OH	JACKSON	39	079	39079	Tramadol	1	632	70999
2010	KY	JEFFERSON	21	111	21111	Codeine	25	5426	29588
2010	OH	JEFFERSON	39	081	39081	Heroin	13	264	70999
2010	OH	JEFFERSON	39	081	39081	Propoxyphene	1	264	70999
2010	PA	JEFFERSON	42	065	42065	Hydrocodone	7	200	89981
2010	PA	JEFFERSON	42	065	42065	Oxycodone	8	200	89981
2010	PA	JEFFERSON	42	065	42065	Oxymorphone	1	200	89981
2010	WV	JEFFERSON	54	037	54037	Oxycodone	6	133	8668
2010	KY	JESSAMINE	21	113	21113	Oxycodone	153	316	29588
2010	WV	KANAWHA	54	039	54039	Heroin	72	1440	8668
2010	WV	KANAWHA	54	039	54039	Methadone	1	1440	8668
2010	KY	KENTON	21	117	21117	Codeine	2	1073	29588
2010	VA	KING GEORGE	51	099	51099	Heroin	5	128	41462
2010	VA	KING GEORGE	51	099	51099	Methadone	2	128	41462
2010	VA	KING WILLIAM	51	101	51101	Hydrocodone	2	48	41462
2010	VA	KING WILLIAM	51	101	51101	Oxycodone	2	48	41462
2010	KY	KNOTT	21	119	21119	Methadone	13	284	29588
2010	OH	KNOX	39	083	39083	Methadone	2	31	70999
2010	OH	LAKE	39	085	39085	Buprenorphine	14	2726	70999
2010	OH	LAKE	39	085	39085	Hydrocodone	39	2726	70999
2010	OH	LAKE	39	085	39085	Propoxyphene	4	2726	70999
2010	PA	LANCASTER	42	071	42071	Fentanyl	1	1683	89981
2010	PA	LANCASTER	42	071	42071	Propoxyphene	2	1683	89981
2010	KY	LAWRENCE	21	127	21127	Oxycodone	47	92	29588
2010	PA	LAWRENCE	42	073	42073	Methadone	4	301	89981
2010	PA	LEBANON	42	075	42075	Morphine	1	648	89981
2010	KY	LEE	21	129	21129	Hydrocodone	6	53	29588
2010	PA	LEHIGH	42	077	42077	Heroin	346	2385	89981
2010	PA	LEHIGH	42	077	42077	Propoxyphene	1	2385	89981
2010	KY	LESLIE	21	131	21131	Oxycodone	23	141	29588
2010	KY	LETCHER	21	133	21133	Hydrocodone	48	292	29588
2010	KY	LETCHER	21	133	21133	Morphine	3	292	29588
2010	KY	LEWIS	21	135	21135	Buprenorphine	4	59	29588
2010	OH	LICKING	39	089	39089	Hydrocodone	55	1639	70999
2010	OH	LICKING	39	089	39089	Morphine	4	1639	70999
2010	KY	LINCOLN	21	137	21137	Oxycodone	8	64	29588
2010	KY	LIVINGSTON	21	139	21139	Hydrocodone	2	26	29588
2010	WV	LOGAN	54	045	54045	Oxycodone	93	307	8668
2010	WV	LOGAN	54	045	54045	Oxymorphone	1	307	8668
2010	OH	LORAIN	39	093	39093	Oxycodone	11	232	70999
2010	PA	FAYETTE	42	051	42051	Hydromorphone	2	859	89981
2010	WV	FAYETTE	54	019	54019	Oxycodone	15	135	8668
2010	KY	FLEMING	21	069	21069	Oxycodone	34	88	29588
2010	OH	FRANKLIN	39	049	39049	Codeine	3	2921	70999
2010	VA	FRANKLIN	51	067	51067	Codeine	2	255	41462
2010	VA	FRANKLIN	51	067	51067	Hydrocodone	23	255	41462
2010	VA	FRANKLIN	51	067	51067	Oxycodone	24	255	41462
2010	VA	FREDERICK	51	069	51069	Hydrocodone	12	401	41462
2010	VA	FREDERICK	51	069	51069	Methadone	4	401	41462
2010	VA	FREDERICKSBURG CITY	51	630	51630	Hydrocodone	2	234	41462
2010	VA	FREDERICKSBURG CITY	51	630	51630	Tramadol	1	234	41462
2010	KY	GARRARD	21	079	21079	Buprenorphine	1	77	29588
2010	KY	GARRARD	21	079	21079	Morphine	1	77	29588
2010	VA	GILES	51	071	51071	Hydromorphone	1	241	41462
2010	VA	GOOCHLAND	51	075	51075	Hydrocodone	1	49	41462
2010	KY	GRANT	21	081	21081	Heroin	3	133	29588
2010	WV	GRANT	54	023	54023	Hydromorphone	3	95	8668
2010	KY	GRAYSON	21	085	21085	Methadone	2	257	29588
2010	VA	GRAYSON	51	077	51077	Hydromorphone	1	103	41462
2010	KY	GREEN	21	087	21087	Oxycodone	4	59	29588
2010	OH	GREENE	39	057	39057	Propoxyphene	1	964	70999
2010	KY	GREENUP	21	089	21089	Methadone	1	108	29588
2010	VA	HALIFAX	51	083	51083	Codeine	1	277	41462
2010	VA	HALIFAX	51	083	51083	Oxycodone	11	277	41462
2010	OH	HAMILTON	39	061	39061	Fentanyl	11	13780	70999
2010	OH	HAMILTON	39	061	39061	Hydromorphone	13	13780	70999
2010	VA	HAMPTON CITY	51	650	51650	Oxycodone	8	775	41462
2010	OH	HANCOCK	39	063	39063	Codeine	5	573	70999
2010	OH	HANCOCK	39	063	39063	Hydrocodone	22	573	70999
2010	OH	HANCOCK	39	063	39063	Methadone	1	573	70999
2010	WV	HANCOCK	54	029	54029	Hydrocodone	4	152	8668
2010	VA	HANOVER	51	085	51085	Codeine	1	510	41462
2010	VA	HANOVER	51	085	51085	Hydrocodone	34	510	41462
2010	KY	HARDIN	21	093	21093	Oxycodone	12	631	29588
2010	OH	HARDIN	39	065	39065	Buprenorphine	9	326	70999
2010	OH	HARDIN	39	065	39065	Morphine	3	326	70999
2010	WV	HARDY	54	031	54031	Dextropropoxyphene	2	76	8668
2010	KY	HARLAN	21	095	21095	Tramadol	4	419	29588
2010	KY	HARRISON	21	097	21097	Hydrocodone	10	106	29588
2010	KY	HARRISON	21	097	21097	Tramadol	1	106	29588
2010	KY	HART	21	099	21099	Morphine	1	76	29588
2010	KY	HENDERSON	21	101	21101	Hydrocodone	3	222	29588
2010	VA	HENRY	51	089	51089	Oxycodone	8	164	41462
2010	OH	HOCKING	39	073	39073	Oxycodone	21	66	70999
2010	KY	HOPKINS	21	107	21107	Morphine	6	249	29588
2010	PA	HUNTINGDON	42	061	42061	Hydrocodone	2	174	89981
2010	KY	JACKSON	21	109	21109	Hydrocodone	21	145	29588
2010	KY	JACKSON	21	109	21109	Methadone	1	145	29588
2010	OH	JACKSON	39	079	39079	Hydromorphone	2	632	70999
2010	WV	JACKSON	54	035	54035	Buprenorphine	2	116	8668
2010	KY	JEFFERSON	21	111	21111	Buprenorphine	33	5426	29588
2010	KY	JEFFERSON	21	111	21111	Morphine	24	5426	29588
2010	PA	JEFFERSON	42	065	42065	Heroin	47	200	89981
2010	PA	JUNIATA	42	067	42067	Oxycodone	1	40	89981
2010	WV	KANAWHA	54	039	54039	Hydrocodone	94	1440	8668
2010	KY	KENTON	21	117	21117	Heroin	216	1073	29588
2010	KY	KENTON	21	117	21117	Pethidine	1	1073	29588
2010	VA	KING GEORGE	51	099	51099	Hydrocodone	3	128	41462
2010	VA	KING WILLIAM	51	101	51101	Heroin	3	48	41462
2010	KY	KNOTT	21	119	21119	Buprenorphine	6	284	29588
2010	KY	KNOX	21	121	21121	Buprenorphine	11	483	29588
2010	OH	LAKE	39	085	39085	Heroin	193	2726	70999
2010	OH	LAKE	39	085	39085	Methadone	10	2726	70999
2010	PA	LANCASTER	42	071	42071	Heroin	273	1683	89981
2010	PA	LANCASTER	42	071	42071	Oxycodone	49	1683	89981
2010	KY	LAUREL	21	125	21125	Oxymorphone	1	623	29588
2010	PA	LAWRENCE	42	073	42073	Tramadol	1	301	89981
2010	PA	LEBANON	42	075	42075	Buprenorphine	6	648	89981
2010	VA	LEE	51	105	51105	Oxycodone	47	108	41462
2010	KY	LETCHER	21	133	21133	Tramadol	2	292	29588
2010	OH	LOGAN	39	091	39091	Codeine	3	273	70999
2010	OH	LOGAN	39	091	39091	Heroin	38	273	70999
2010	VA	LOUDOUN	51	107	51107	Fentanyl	1	902	41462
2010	OH	LUCAS	39	095	39095	Buprenorphine	17	1995	70999
2010	OH	LUCAS	39	095	39095	Morphine	17	1995	70999
2010	VA	LUNENBURG	51	111	51111	Buprenorphine	1	110	41462
2010	VA	LUNENBURG	51	111	51111	Morphine	3	110	41462
2010	PA	LUZERNE	42	079	42079	Methadone	1	1448	89981
2010	PA	LYCOMING	42	081	42081	Oxycodone	15	683	89981
2010	VA	LYNCHBURG CITY	51	680	51680	Heroin	19	502	41462
2010	KY	LYON	21	143	21143	Oxycodone	2	56	29588
2010	KY	MADISON	21	151	21151	Buprenorphine	15	465	29588
2010	VA	MADISON	51	113	51113	Hydromorphone	1	68	41462
2010	KY	MAGOFFIN	21	153	21153	Morphine	1	57	29588
2010	OH	MAHONING	39	099	39099	Tramadol	2	2309	70999
2010	OH	MARION	39	101	39101	Codeine	1	307	70999
2010	OH	MARION	39	101	39101	Hydrocodone	19	307	70999
2010	OH	MARION	39	101	39101	Methadone	8	307	70999
2010	WV	MARION	54	049	54049	Heroin	100	348	8668
2010	WV	MARSHALL	54	051	54051	Hydrocodone	7	126	8668
2010	KY	MARTIN	21	159	21159	Buprenorphine	1	90	29588
2010	VA	MARTINSVILLE CITY	51	690	51690	Tramadol	1	92	41462
2010	KY	MASON	21	161	21161	Codeine	2	286	29588
2010	WV	MASON	54	053	54053	Oxycodone	11	94	8668
2010	KY	MCCRACKEN	21	145	21145	Methorphan	2	386	29588
2010	KY	MCCREARY	21	147	21147	Oxycodone	35	136	29588
2010	WV	MCDOWELL	54	047	54047	Hydrocodone	8	99	8668
2010	PA	MCKEAN	42	083	42083	Buprenorphine	8	272	89981
2010	KY	MENIFEE	21	165	21165	Methadone	1	29	29588
2010	OH	MERCER	39	107	39107	Heroin	28	92	70999
2010	OH	MERCER	39	107	39107	Oxycodone	16	92	70999
2010	VA	FAIRFAX	51	059	51059	Morphine	12	3337	41462
2010	VA	FALLS CHURCH CITY	51	610	51610	Tramadol	1	65	41462
2010	VA	FAUQUIER	51	061	51061	Methadone	6	418	41462
2010	KY	FAYETTE	21	067	21067	Hydrocodone	105	1967	29588
2010	KY	FAYETTE	21	067	21067	Tramadol	4	1967	29588
2010	OH	FAYETTE	39	047	39047	Oxycodone	19	95	70999
2010	PA	FOREST	42	053	42053	Oxycodone	1	23	89981
2010	PA	FRANKLIN	42	055	42055	Hydromorphone	2	755	89981
2010	VA	FRANKLIN	51	067	51067	Heroin	11	255	41462
2010	VA	FRANKLIN	51	067	51067	Propoxyphene	2	255	41462
2010	VA	FREDERICK	51	069	51069	Codeine	1	401	41462
2010	VA	FREDERICK	51	069	51069	Morphine	3	401	41462
2010	VA	FREDERICKSBURG CITY	51	630	51630	Buprenorphine	1	234	41462
2010	OH	GALLIA	39	053	39053	Oxycodone	125	416	70999
2010	OH	GALLIA	39	053	39053	Oxymorphone	13	416	70999
2010	KY	GARRARD	21	079	21079	Hydrocodone	6	77	29588
2010	VA	GLOUCESTER	51	073	51073	Hydromorphone	2	133	41462
2010	VA	GOOCHLAND	51	075	51075	Buprenorphine	1	49	41462
2010	KY	GRANT	21	081	21081	Codeine	1	133	29588
2010	KY	GRANT	21	081	21081	Hydrocodone	5	133	29588
2010	WV	GRANT	54	023	54023	Oxycodone	8	95	8668
2010	KY	GRAYSON	21	085	21085	Hydrocodone	19	257	29588
2010	WV	GREENBRIER	54	025	54025	Hydrocodone	3	254	8668
2010	OH	GREENE	39	057	39057	Buprenorphine	7	964	70999
2010	OH	GREENE	39	057	39057	Codeine	1	964	70999
2010	OH	GREENE	39	057	39057	Morphine	4	964	70999
2010	VA	GREENE	51	079	51079	Morphine	3	102	41462
2010	OH	GUERNSEY	39	059	39059	Methadone	5	316	70999
2010	VA	HAMPTON CITY	51	650	51650	Methadone	5	775	41462
2010	OH	HANCOCK	39	063	39063	Morphine	2	573	70999
2010	KY	HARDIN	21	093	21093	Propoxyphene	1	631	29588
2010	OH	HARDIN	39	065	39065	Methadone	2	326	70999
2010	KY	HARLAN	21	095	21095	Buprenorphine	37	419	29588
2010	KY	HARLAN	21	095	21095	Codeine	2	419	29588
2010	KY	HARLAN	21	095	21095	Hydrocodone	85	419	29588
2010	KY	HARLAN	21	095	21095	Morphine	2	419	29588
2010	WV	HARRISON	54	033	54033	Morphine	2	196	8668
2010	VA	HARRISONBURG CITY	51	660	51660	Heroin	4	48	41462
2010	KY	HENRY	21	103	21103	Hydrocodone	3	19	29588
2010	OH	HENRY	39	069	39069	Heroin	3	50	70999
2010	OH	HIGHLAND	39	071	39071	Hydromorphone	1	527	70999
2010	OH	HIGHLAND	39	071	39071	Oxycodone	56	527	70999
2010	VA	HOPEWELL CITY	51	670	51670	Heroin	6	215	41462
2010	PA	HUNTINGDON	42	061	42061	Heroin	33	174	89981
2010	VA	ISLE OF WIGHT	51	093	51093	Oxycodone	3	169	41462
2010	KY	JACKSON	21	109	21109	Morphine	1	145	29588
2010	WV	JACKSON	54	035	54035	Dextropropoxyphene	1	116	8668
2010	KY	JEFFERSON	21	111	21111	Tramadol	23	5426	29588
2010	KY	JOHNSON	21	115	21115	Oxycodone	86	243	29588
2010	WV	KANAWHA	54	039	54039	Buprenorphine	12	1440	8668
2010	WV	KANAWHA	54	039	54039	Codeine	2	1440	8668
2010	WV	KANAWHA	54	039	54039	Dextropropoxyphene	3	1440	8668
2010	KY	KNOTT	21	119	21119	Morphine	1	284	29588
2010	KY	KNOX	21	121	21121	Methadone	8	483	29588
2010	OH	KNOX	39	083	39083	Oxycodone	3	31	70999
2010	PA	LACKAWANNA	42	069	42069	Oxycodone	27	1123	89981
2010	PA	LANCASTER	42	071	42071	Hydromorphone	2	1683	89981
2010	OH	LAWRENCE	39	087	39087	Heroin	4	156	70999
2010	PA	LEBANON	42	075	42075	Heroin	41	648	89981
2010	PA	LEBANON	42	075	42075	Methadone	1	648	89981
2010	PA	LEHIGH	42	077	42077	Buprenorphine	16	2385	89981
2010	PA	LEHIGH	42	077	42077	Codeine	1	2385	89981
2010	PA	LEHIGH	42	077	42077	Morphine	2	2385	89981
2010	KY	LETCHER	21	133	21133	Methadone	7	292	29588
2010	KY	LEWIS	21	135	21135	Methadone	1	59	29588
2010	OH	LICKING	39	089	39089	Methadone	11	1639	70999
2010	OH	LICKING	39	089	39089	Tramadol	1	1639	70999
2010	KY	LIVINGSTON	21	139	21139	Oxycodone	1	26	29588
2010	OH	LOGAN	39	091	39091	Hydrocodone	10	273	70999
2010	VA	LOUDOUN	51	107	51107	Buprenorphine	4	902	41462
2010	VA	LOUDOUN	51	107	51107	Codeine	6	902	41462
2010	VA	LOUDOUN	51	107	51107	Hydrocodone	26	902	41462
2010	VA	LOUDOUN	51	107	51107	Morphine	3	902	41462
2010	VA	LOUDOUN	51	107	51107	Tramadol	1	902	41462
2010	VA	LOUISA	51	109	51109	Oxycodone	9	184	41462
2010	OH	LUCAS	39	095	39095	Tramadol	6	1995	70999
2010	VA	LUNENBURG	51	111	51111	Methadone	2	110	41462
2010	VA	LYNCHBURG CITY	51	680	51680	Oxycodone	12	502	41462
2010	KY	MADISON	21	151	21151	Morphine	4	465	29588
2010	KY	MAGOFFIN	21	153	21153	Methadone	1	57	29588
2010	OH	MAHONING	39	099	39099	Oxymorphone	4	2309	70999
2010	KY	MARION	21	155	21155	Oxycodone	12	133	29588
2010	OH	MARION	39	101	39101	Heroin	61	307	70999
2010	WV	MARION	54	049	54049	Buprenorphine	2	348	8668
2010	WV	MARION	54	049	54049	Hydrocodone	13	348	8668
2010	WV	MARION	54	049	54049	Morphine	15	348	8668
2010	KY	MARSHALL	21	157	21157	Hydrocodone	2	76	29588
2010	KY	MASON	21	161	21161	Methadone	1	286	29588
2010	KY	MCCREARY	21	147	21147	Methadone	2	136	29588
2010	WV	MCDOWELL	54	047	54047	Methadone	1	99	8668
2010	PA	MCKEAN	42	083	42083	Fentanyl	3	272	89981
2010	PA	MCKEAN	42	083	42083	Heroin	3	272	89981
2010	PA	MCKEAN	42	083	42083	Propoxyphene	4	272	89981
2010	KY	MCLEAN	21	149	21149	Hydromorphone	1	65	29588
2010	VA	MECKLENBURG	51	117	51117	Oxycodone	5	171	41462
2010	OH	MEIGS	39	105	39105	Morphine	3	102	70999
2010	KY	MENIFEE	21	165	21165	Tramadol	1	29	29588
2010	KY	MERCER	21	167	21167	Hydrocodone	5	86	29588
2010	OH	MERCER	39	107	39107	Hydrocodone	8	92	70999
2010	PA	MERCER	42	085	42085	Buprenorphine	3	357	89981
2010	OH	ERIE	39	043	39043	Hydromorphone	2	552	70999
2010	PA	ERIE	42	049	42049	Buprenorphine	20	1570	89981
2010	PA	ERIE	42	049	42049	Morphine	13	1570	89981
2010	KY	ESTILL	21	065	21065	Oxycodone	32	85	29588
2010	VA	FAIRFAX CITY	51	600	51600	Propoxyphene	1	148	41462
2010	VA	FAUQUIER	51	061	51061	Fentanyl	2	418	41462
2010	VA	FAUQUIER	51	061	51061	Hydromorphone	7	418	41462
2010	VA	FAUQUIER	51	061	51061	Tramadol	3	418	41462
2010	KY	FAYETTE	21	067	21067	Methorphan	11	1967	29588
2010	KY	FAYETTE	21	067	21067	Oxycodone	326	1967	29588
2010	KY	FAYETTE	21	067	21067	Oxymorphone	1	1967	29588
2010	PA	FAYETTE	42	051	42051	Morphine	4	859	89981
2010	WV	FAYETTE	54	019	54019	Methadone	2	135	8668
2010	KY	FLOYD	21	071	21071	Buprenorphine	6	306	29588
2010	KY	FLOYD	21	071	21071	Morphine	4	306	29588
2010	VA	FLOYD	51	063	51063	Buprenorphine	1	78	41462
2010	KY	FRANKLIN	21	073	21073	Buprenorphine	4	430	29588
2010	OH	FRANKLIN	39	049	39049	Heroin	327	2921	70999
2010	OH	FRANKLIN	39	049	39049	Methadone	16	2921	70999
2010	PA	FRANKLIN	42	055	42055	Buprenorphine	17	755	89981
2010	PA	FRANKLIN	42	055	42055	Morphine	4	755	89981
2010	VA	FRANKLIN	51	067	51067	Methadone	2	255	41462
2010	VA	FRANKLIN CITY	51	620	51620	Heroin	3	64	41462
2010	VA	FREDERICK	51	069	51069	Oxycodone	30	401	41462
2010	VA	FREDERICKSBURG CITY	51	630	51630	Hydromorphone	5	234	41462
2010	PA	FULTON	42	057	42057	Buprenorphine	6	122	89981
2010	PA	FULTON	42	057	42057	Fentanyl	1	122	89981
2010	PA	FULTON	42	057	42057	Morphine	1	122	89981
2010	KY	GALLATIN	21	077	21077	Oxycodone	5	40	29588
2010	OH	GALLIA	39	053	39053	Buprenorphine	20	416	70999
2010	VA	GILES	51	071	51071	Morphine	6	241	41462
2010	VA	GLOUCESTER	51	073	51073	Buprenorphine	1	133	41462
2010	VA	GLOUCESTER	51	073	51073	Morphine	2	133	41462
2010	KY	GRANT	21	081	21081	Morphine	1	133	29588
2010	KY	GRANT	21	081	21081	Oxymorphone	1	133	29588
2010	WV	GRANT	54	023	54023	Morphine	2	95	8668
2010	VA	GRAYSON	51	077	51077	Morphine	2	103	41462
2010	OH	GREENE	39	057	39057	Dextropropoxyphene	2	964	70999
2010	PA	GREENE	42	059	42059	Hydrocodone	4	179	89981
2010	VA	GREENSVILLE	51	081	51081	Hydrocodone	3	112	41462
2010	KY	GREENUP	21	089	21089	Hydrocodone	12	108	29588
2010	OH	GUERNSEY	39	059	39059	Heroin	14	316	70999
2010	OH	GUERNSEY	39	059	39059	Oxycodone	45	316	70999
2010	OH	GUERNSEY	39	059	39059	Propoxyphene	1	316	70999
2010	VA	HALIFAX	51	083	51083	Methadone	3	277	41462
2010	OH	HAMILTON	39	061	39061	Dextropropoxyphene	7	13780	70999
2010	OH	HAMILTON	39	061	39061	Morphine	74	13780	70999
2010	VA	HAMPTON CITY	51	650	51650	Heroin	41	775	41462
2010	VA	HAMPTON CITY	51	650	51650	Propoxyphene	1	775	41462
2010	OH	HANCOCK	39	063	39063	Oxycodone	55	573	70999
2010	WV	HANCOCK	54	029	54029	Oxycodone	4	152	8668
2010	VA	HANOVER	51	085	51085	Methadone	7	510	41462
2010	KY	HARDIN	21	093	21093	Methadone	5	631	29588
2010	WV	HARDY	54	031	54031	Hydromorphone	1	76	8668
2010	KY	HARLAN	21	095	21095	Hydromorphone	1	419	29588
2010	WV	HARRISON	54	033	54033	Codeine	2	196	8668
2010	WV	HARRISON	54	033	54033	Heroin	35	196	8668
2010	VA	HARRISONBURG CITY	51	660	51660	Methadone	1	48	41462
2010	VA	HENRICO	51	087	51087	Fentanyl	1	1154	41462
2010	VA	HENRICO	51	087	51087	Hydromorphone	2	1154	41462
2010	VA	HENRICO	51	087	51087	Meperidine	1	1154	41462
2010	VA	HENRY	51	089	51089	Methadone	1	164	41462
2010	OH	HIGHLAND	39	071	39071	Codeine	3	527	70999
2010	OH	HOCKING	39	073	39073	Heroin	13	66	70999
2010	OH	HOLMES	39	075	39075	Hydromorphone	1	129	70999
2010	OH	HURON	39	077	39077	Morphine	1	240	70999
2010	PA	INDIANA	42	063	42063	Buprenorphine	7	604	89981
2010	PA	INDIANA	42	063	42063	Morphine	2	604	89981
2010	VA	ISLE OF WIGHT	51	093	51093	Heroin	1	169	41462
2010	VA	ISLE OF WIGHT	51	093	51093	Methadone	1	169	41462
2010	KY	JACKSON	21	109	21109	Oxycodone	20	145	29588
2010	OH	JACKSON	39	079	39079	Hydrocodone	27	632	70999
2010	OH	JACKSON	39	079	39079	Methadone	5	632	70999
2010	VA	JAMES CITY	51	095	51095	Buprenorphine	1	237	41462
2010	KY	JEFFERSON	21	111	21111	Propoxyphene	13	5426	29588
2010	OH	JEFFERSON	39	081	39081	Buprenorphine	1	264	70999
2010	OH	JEFFERSON	39	081	39081	Morphine	4	264	70999
2010	PA	JEFFERSON	42	065	42065	Codeine	1	200	89981
2010	KY	JOHNSON	21	115	21115	Hydrocodone	48	243	29588
2010	PA	JUNIATA	42	067	42067	Heroin	2	40	89981
2010	KY	KENTON	21	117	21117	Oxycodone	173	1073	29588
2010	KY	KENTON	21	117	21117	Oxymorphone	5	1073	29588
2010	OH	KNOX	39	083	39083	Hydrocodone	1	31	70999
2010	PA	LACKAWANNA	42	069	42069	Hydrocodone	32	1123	89981
2010	OH	LAKE	39	085	39085	Oxycodone	119	2726	70999
2010	OH	LAKE	39	085	39085	Oxymorphone	1	2726	70999
2010	PA	LANCASTER	42	071	42071	Codeine	3	1683	89981
2010	KY	LARUE	21	123	21123	Oxycodone	2	74	29588
2010	KY	LAWRENCE	21	127	21127	Buprenorphine	6	92	29588
2010	KY	LAWRENCE	21	127	21127	Morphine	2	92	29588
2010	VA	LEE	51	105	51105	Hydrocodone	7	108	41462
2010	VA	LEE	51	105	51105	Methadone	2	108	41462
2010	KY	LESLIE	21	131	21131	Buprenorphine	1	141	29588
2010	KY	LETCHER	21	133	21133	Methorphan	2	292	29588
2010	VA	LEXINGTON CITY	51	678	51678	Oxycodone	2	17	41462
2010	OH	LICKING	39	089	39089	Fentanyl	1	1639	70999
2010	OH	LICKING	39	089	39089	Hydromorphone	3	1639	70999
2010	OH	LICKING	39	089	39089	Opiates	14	1639	70999
2010	OH	LOGAN	39	091	39091	Oxycodone	16	273	70999
2010	OH	LOGAN	39	091	39091	Oxymorphone	3	273	70999
2010	VA	DICKENSON	51	051	51051	Hydrocodone	28	103	41462
2010	VA	DICKENSON	51	051	51051	Morphine	15	103	41462
2010	VA	DINWIDDIE	51	053	51053	Morphine	2	131	41462
2010	PA	ELK	42	047	42047	Buprenorphine	11	123	89981
2010	PA	ELK	42	047	42047	Hydrocodone	3	123	89981
2010	OH	ERIE	39	043	39043	Fentanyl	3	552	70999
2010	VA	FAIRFAX	51	059	51059	Heroin	102	3337	41462
2010	VA	FAIRFAX	51	059	51059	Methadone	16	3337	41462
2010	OH	FAIRFIELD	39	045	39045	Methadone	1	846	70999
2010	VA	FAUQUIER	51	061	51061	Hydrocodone	7	418	41462
2010	VA	FAUQUIER	51	061	51061	Morphine	2	418	41462
2010	KY	FAYETTE	21	067	21067	Hydromorphone	3	1967	29588
2010	PA	FAYETTE	42	051	42051	Buprenorphine	17	859	89981
2010	PA	FAYETTE	42	051	42051	Codeine	2	859	89981
2010	PA	FAYETTE	42	051	42051	Propoxyphene	1	859	89981
2010	WV	FAYETTE	54	019	54019	Hydrocodone	8	135	8668
2010	KY	FLOYD	21	071	21071	Heroin	1	306	29588
2010	VA	FLUVANNA	51	065	51065	Methadone	1	50	41462
2010	KY	FRANKLIN	21	073	21073	Hydrocodone	17	430	29588
2010	OH	FRANKLIN	39	049	39049	Fentanyl	1	2921	70999
2010	OH	FRANKLIN	39	049	39049	Propoxyphene	2	2921	70999
2010	VA	FRANKLIN	51	067	51067	Hydromorphone	1	255	41462
2010	VA	FREDERICK	51	069	51069	Heroin	69	401	41462
2010	VA	FREDERICK	51	069	51069	Propoxyphene	1	401	41462
2010	VA	FREDERICK	51	069	51069	Tramadol	1	401	41462
2010	VA	FREDERICKSBURG CITY	51	630	51630	Fentanyl	1	234	41462
2010	VA	FREDERICKSBURG CITY	51	630	51630	Heroin	8	234	41462
2010	VA	FREDERICKSBURG CITY	51	630	51630	Methadone	3	234	41462
2010	KY	FULTON	21	075	21075	Hydrocodone	20	74	29588
2010	KY	FULTON	21	075	21075	Oxycodone	1	74	29588
2010	VA	GALAX CITY	51	640	51640	Oxycodone	2	31	41462
2010	VA	GALAX CITY	51	640	51640	Oxymorphone	1	31	41462
2010	KY	GALLATIN	21	077	21077	Hydrocodone	2	40	29588
2010	OH	GALLIA	39	053	39053	Hydromorphone	8	416	70999
2010	OH	GALLIA	39	053	39053	Morphine	3	416	70999
2010	OH	GEAUGA	39	055	39055	Heroin	6	114	70999
2010	VA	GLOUCESTER	51	073	51073	Oxycodone	8	133	41462
2010	VA	GOOCHLAND	51	075	51075	Heroin	2	49	41462
2010	KY	GRANT	21	081	21081	Oxycodone	26	133	29588
2010	WV	GRANT	54	023	54023	Buprenorphine	1	95	8668
2010	KY	GRAVES	21	083	21083	Morphine	1	217	29588
2010	OH	GREENE	39	057	39057	Heroin	88	964	70999
2010	OH	GREENE	39	057	39057	Oxycodone	33	964	70999
2010	PA	GREENE	42	059	42059	Morphine	1	179	89981
2010	VA	GREENE	51	079	51079	Oxycodone	3	102	41462
2010	KY	GREENUP	21	089	21089	Buprenorphine	2	108	29588
2010	KY	GREENUP	21	089	21089	Codeine	1	108	29588
2010	VA	HALIFAX	51	083	51083	Buprenorphine	1	277	41462
2010	VA	HALIFAX	51	083	51083	Hydrocodone	15	277	41462
2010	VA	HALIFAX	51	083	51083	Propoxyphene	2	277	41462
2010	OH	HAMILTON	39	061	39061	Buprenorphine	106	13780	70999
2010	VA	HAMPTON CITY	51	650	51650	Buprenorphine	3	775	41462
2010	VA	HAMPTON CITY	51	650	51650	Hydrocodone	4	775	41462
2010	OH	HANCOCK	39	063	39063	Heroin	32	573	70999
2010	OH	HANCOCK	39	063	39063	Propoxyphene	2	573	70999
2010	VA	HANOVER	51	085	51085	Fentanyl	1	510	41462
2010	VA	HANOVER	51	085	51085	Heroin	39	510	41462
2010	VA	HANOVER	51	085	51085	Propoxyphene	2	510	41462
2010	OH	HARDIN	39	065	39065	Heroin	113	326	70999
2010	OH	HARDIN	39	065	39065	Propoxyphene	1	326	70999
2010	WV	HARDY	54	031	54031	Hydrocodone	5	76	8668
2010	KY	HARRISON	21	097	21097	Buprenorphine	2	106	29588
2010	KY	HARRISON	21	097	21097	Codeine	2	106	29588
2010	WV	HARRISON	54	033	54033	Oxycodone	3	196	8668
2010	VA	HARRISONBURG CITY	51	660	51660	Morphine	1	48	41462
2010	VA	HENRICO	51	087	51087	Hydrocodone	23	1154	41462
2010	VA	HENRICO	51	087	51087	Morphine	9	1154	41462
2010	VA	HENRICO	51	087	51087	Tramadol	4	1154	41462
2010	OH	HIGHLAND	39	071	39071	Buprenorphine	7	527	70999
2010	VA	HIGHLAND	51	091	51091	Hydrocodone	1	3	41462
2010	OH	HOLMES	39	075	39075	Hydrocodone	3	129	70999
2010	OH	HOLMES	39	075	39075	Morphine	1	129	70999
2010	PA	HUNTINGDON	42	061	42061	Morphine	2	174	89981
2010	OH	HURON	39	077	39077	Methadone	2	240	70999
2010	PA	INDIANA	42	063	42063	Oxycodone	20	604	89981
2010	PA	INDIANA	42	063	42063	Oxymorphone	2	604	89981
2010	WV	JACKSON	54	035	54035	Oxycodone	7	116	8668
2010	VA	JAMES CITY	51	095	51095	Hydrocodone	4	237	41462
2010	OH	JEFFERSON	39	081	39081	Oxymorphone	3	264	70999
2010	WV	JEFFERSON	54	037	54037	Heroin	12	133	8668
2010	KY	JESSAMINE	21	113	21113	Methadone	13	316	29588
2010	PA	JUNIATA	42	067	42067	Buprenorphine	3	40	89981
2010	KY	KENTON	21	117	21117	Buprenorphine	22	1073	29588
2010	KY	KENTON	21	117	21117	Hydrocodone	48	1073	29588
2010	VA	KING GEORGE	51	099	51099	Oxycodone	13	128	41462
2010	KY	KNOTT	21	119	21119	Oxycodone	80	284	29588
2010	KY	KNOX	21	121	21121	Morphine	4	483	29588
2010	OH	LAKE	39	085	39085	Codeine	4	2726	70999
2010	OH	LAKE	39	085	39085	Morphine	8	2726	70999
2010	PA	LANCASTER	42	071	42071	Hydrocodone	33	1683	89981
2010	VA	LANCASTER	51	103	51103	Hydrocodone	1	24	41462
2010	VA	LANCASTER	51	103	51103	Tramadol	1	24	41462
2010	KY	LARUE	21	123	21123	Hydrocodone	5	74	29588
2010	KY	LAUREL	21	125	21125	Oxycodone	111	623	29588
2010	OH	LAWRENCE	39	087	39087	Buprenorphine	2	156	70999
2010	PA	LAWRENCE	42	073	42073	Oxycodone	77	301	89981
2010	PA	LEHIGH	42	077	42077	Oxycodone	26	2385	89981
2010	KY	LESLIE	21	131	21131	Methadone	5	141	29588
2010	KY	LETCHER	21	133	21133	Buprenorphine	26	292	29588
2010	KY	LEWIS	21	135	21135	Hydrocodone	3	59	29588
2010	OH	ERIE	39	043	39043	Methadone	6	552	70999
2010	PA	ERIE	42	049	42049	Hydrocodone	42	1570	89981
2010	VA	FAIRFAX	51	059	51059	Hydrocodone	30	3337	41462
2010	VA	FAIRFAX	51	059	51059	Tramadol	6	3337	41462
2010	VA	FAIRFAX CITY	51	600	51600	Hydromorphone	1	148	41462
2010	OH	FAIRFIELD	39	045	39045	Oxymorphone	1	846	70999
2010	VA	FALLS CHURCH CITY	51	610	51610	Heroin	3	65	41462
2010	VA	FAUQUIER	51	061	51061	Heroin	33	418	41462
2010	VA	FAUQUIER	51	061	51061	Propoxyphene	3	418	41462
2010	KY	FAYETTE	21	067	21067	Morphine	5	1967	29588
2010	OH	FAYETTE	39	047	39047	Codeine	1	95	70999
2010	PA	FAYETTE	42	051	42051	Oxycodone	45	859	89981
2010	PA	FAYETTE	42	051	42051	Oxymorphone	7	859	89981
2010	PA	FAYETTE	42	051	42051	Pethidine	2	859	89981
2010	KY	FLOYD	21	071	21071	Hydrocodone	74	306	29588
2010	KY	FLOYD	21	071	21071	Methadone	9	306	29588
2010	VA	FLOYD	51	063	51063	Hydrocodone	8	78	41462
2010	VA	FLUVANNA	51	065	51065	Oxycodone	2	50	41462
2010	PA	FOREST	42	053	42053	Heroin	3	23	89981
2010	KY	FRANKLIN	21	073	21073	Heroin	15	430	29588
2010	OH	FRANKLIN	39	049	39049	Morphine	18	2921	70999
2010	PA	FRANKLIN	42	055	42055	Codeine	2	755	89981
2010	PA	FRANKLIN	42	055	42055	Methorphan	1	755	89981
2010	PA	FRANKLIN	42	055	42055	Oxycodone	29	755	89981
2010	VA	FRANKLIN	51	067	51067	Morphine	1	255	41462
2010	OH	FULTON	39	051	39051	Heroin	5	65	70999
2010	PA	FULTON	42	057	42057	Heroin	2	122	89981
2010	VA	GILES	51	071	51071	Heroin	1	241	41462
2010	KY	GRAYSON	21	085	21085	Morphine	17	257	29588
2010	VA	GRAYSON	51	077	51077	Methadone	1	103	41462
2010	WV	GREENBRIER	54	025	54025	Buprenorphine	2	254	8668
2010	OH	GREENE	39	057	39057	Hydrocodone	22	964	70999
2010	VA	GREENE	51	079	51079	Methadone	1	102	41462
2010	KY	GREENUP	21	089	21089	Oxycodone	53	108	29588
2010	OH	GUERNSEY	39	059	39059	Morphine	3	316	70999
2010	OH	HAMILTON	39	061	39061	Codeine	26	13780	70999
2010	OH	HAMILTON	39	061	39061	Oxycodone	1016	13780	70999
2010	OH	HAMILTON	39	061	39061	Oxymorphone	17	13780	70999
2010	WV	HANCOCK	54	029	54029	Buprenorphine	2	152	8668
2010	WV	HANCOCK	54	029	54029	Dextropropoxyphene	2	152	8668
2010	WV	HANCOCK	54	029	54029	Morphine	1	152	8668
2010	VA	HANOVER	51	085	51085	Morphine	10	510	41462
2010	OH	HARDIN	39	065	39065	Hydrocodone	13	326	70999
2010	WV	HARDY	54	031	54031	Heroin	3	76	8668
2010	KY	HARLAN	21	095	21095	Oxycodone	145	419	29588
2010	KY	HARRISON	21	097	21097	Oxycodone	39	106	29588
2010	VA	HENRICO	51	087	51087	Heroin	129	1154	41462
2010	VA	HENRICO	51	087	51087	Methadone	12	1154	41462
2010	VA	HENRICO	51	087	51087	Propoxyphene	2	1154	41462
2010	OH	HIGHLAND	39	071	39071	Fentanyl	3	527	70999
2010	OH	HIGHLAND	39	071	39071	Tramadol	3	527	70999
2010	OH	HOLMES	39	075	39075	Heroin	5	129	70999
2010	VA	HOPEWELL CITY	51	670	51670	Hydrocodone	12	215	41462
2010	VA	HOPEWELL CITY	51	670	51670	Oxycodone	5	215	41462
2010	KY	HOPKINS	21	107	21107	Methadone	1	249	29588
2010	OH	HURON	39	077	39077	Oxymorphone	2	240	70999
2010	KY	JACKSON	21	109	21109	Buprenorphine	5	145	29588
2010	OH	JACKSON	39	079	39079	Oxycodone	141	632	70999
2010	OH	JACKSON	39	079	39079	Oxymorphone	8	632	70999
2010	VA	JAMES CITY	51	095	51095	Heroin	10	237	41462
2010	VA	JAMES CITY	51	095	51095	Methadone	3	237	41462
2010	KY	JEFFERSON	21	111	21111	Hydrocodone	598	5426	29588
2010	KY	JEFFERSON	21	111	21111	Methorphan	2	5426	29588
2010	KY	JEFFERSON	21	111	21111	Pethidine	2	5426	29588
2010	OH	JEFFERSON	39	081	39081	Methadone	2	264	70999
2010	PA	JEFFERSON	42	065	42065	Morphine	1	200	89981
2010	KY	JESSAMINE	21	113	21113	Morphine	1	316	29588
2010	KY	JESSAMINE	21	113	21113	Tramadol	1	316	29588
2010	KY	JOHNSON	21	115	21115	Morphine	2	243	29588
2010	WV	KANAWHA	54	039	54039	Oxycodone	154	1440	8668
2010	WV	KANAWHA	54	039	54039	Oxymorphone	2	1440	8668
2010	VA	KING GEORGE	51	099	51099	Buprenorphine	2	128	41462
2010	VA	KING WILLIAM	51	101	51101	Morphine	1	48	41462
2010	VA	KING WILLIAM	51	101	51101	Tramadol	1	48	41462
2010	OH	KNOX	39	083	39083	Buprenorphine	1	31	70999
2010	PA	LACKAWANNA	42	069	42069	Buprenorphine	22	1123	89981
2010	PA	LACKAWANNA	42	069	42069	Propoxyphene	1	1123	89981
2010	OH	LAKE	39	085	39085	Fentanyl	1	2726	70999
2010	OH	LAKE	39	085	39085	Hydromorphone	2	2726	70999
2010	PA	LANCASTER	42	071	42071	Buprenorphine	14	1683	89981
2010	KY	LAWRENCE	21	127	21127	Hydrocodone	10	92	29588
2010	KY	LAWRENCE	21	127	21127	Methadone	1	92	29588
2010	OH	LAWRENCE	39	087	39087	Hydrocodone	8	156	70999
2010	PA	LAWRENCE	42	073	42073	Buprenorphine	4	301	89981
2010	PA	LAWRENCE	42	073	42073	Heroin	12	301	89981
2010	PA	LEBANON	42	075	42075	Hydrocodone	5	648	89981
2010	KY	LEE	21	129	21129	Oxycodone	19	53	29588
2010	VA	LEE	51	105	51105	Buprenorphine	5	108	41462
2010	PA	LEHIGH	42	077	42077	Methadone	6	2385	89981
2010	KY	LESLIE	21	131	21131	Hydrocodone	23	141	29588
2010	KY	LESLIE	21	131	21131	Tramadol	4	141	29588
2010	OH	LICKING	39	089	39089	Oxycodone	98	1639	70999
2010	OH	LICKING	39	089	39089	Oxymorphone	1	1639	70999
2010	KY	LINCOLN	21	137	21137	Hydrocodone	4	64	29588
2010	KY	LINCOLN	21	137	21137	Methadone	1	64	29588
2010	OH	LOGAN	39	091	39091	Morphine	4	273	70999
2010	VA	LOUDOUN	51	107	51107	Oxycodone	56	902	41462
2010	VA	LOUDOUN	51	107	51107	Oxymorphone	2	902	41462
2010	VA	LUNENBURG	51	111	51111	Hydrocodone	3	110	41462
2010	KY	MADISON	21	151	21151	Hydrocodone	32	465	29588
2010	KY	MAGOFFIN	21	153	21153	Oxycodone	36	57	29588
2010	OH	FAYETTE	39	047	39047	Hydrocodone	5	95	70999
2010	KY	FLEMING	21	069	21069	Buprenorphine	6	88	29588
2010	KY	FLEMING	21	069	21069	Hydrocodone	6	88	29588
2010	VA	FLUVANNA	51	065	51065	Hydrocodone	2	50	41462
2010	KY	FRANKLIN	21	073	21073	Methadone	4	430	29588
2010	OH	FRANKLIN	39	049	39049	Hydromorphone	5	2921	70999
2010	PA	FRANKLIN	42	055	42055	Methadone	7	755	89981
2010	VA	FRANKLIN	51	067	51067	Tramadol	1	255	41462
2010	VA	FREDERICK	51	069	51069	Hydromorphone	12	401	41462
2010	OH	FULTON	39	051	39051	Buprenorphine	4	65	70999
2010	OH	FULTON	39	051	39051	Hydrocodone	3	65	70999
2010	PA	FULTON	42	057	42057	Hydrocodone	5	122	89981
2010	KY	GALLATIN	21	077	21077	Methadone	1	40	29588
2010	OH	GALLIA	39	053	39053	Fentanyl	1	416	70999
2010	OH	GALLIA	39	053	39053	Heroin	8	416	70999
2010	OH	GALLIA	39	053	39053	Methadone	3	416	70999
2010	KY	GARRARD	21	079	21079	Oxycodone	17	77	29588
2010	OH	GEAUGA	39	055	39055	Hydrocodone	3	114	70999
2010	VA	GILES	51	071	51071	Buprenorphine	7	241	41462
2010	VA	GILES	51	071	51071	Hydrocodone	39	241	41462
2010	VA	GILES	51	071	51071	Tramadol	2	241	41462
2010	VA	GLOUCESTER	51	073	51073	Methadone	3	133	41462
2010	KY	GRAYSON	21	085	21085	Oxycodone	7	257	29588
2010	VA	GRAYSON	51	077	51077	Meperidine	1	103	41462
2010	WV	GREENBRIER	54	025	54025	Oxycodone	8	254	8668
2010	PA	GREENE	42	059	42059	Heroin	66	179	89981
2010	PA	GREENE	42	059	42059	Methadone	1	179	89981
2010	VA	GREENSVILLE	51	081	51081	Buprenorphine	2	112	41462
2010	KY	GREENUP	21	089	21089	Heroin	2	108	29588
2010	OH	GUERNSEY	39	059	39059	Hydromorphone	1	316	70999
2010	OH	HAMILTON	39	061	39061	Methorphan	1	13780	70999
2010	VA	HANOVER	51	085	51085	Hydromorphone	4	510	41462
2010	KY	HARDIN	21	093	21093	Codeine	1	631	29588
2010	KY	HARDIN	21	093	21093	Hydrocodone	31	631	29588
2010	KY	HARDIN	21	093	21093	Morphine	4	631	29588
2010	KY	HARDIN	21	093	21093	Tramadol	4	631	29588
2010	KY	HARLAN	21	095	21095	Propoxyphene	1	419	29588
2010	WV	HARRISON	54	033	54033	Hydrocodone	8	196	8668
2010	KY	HENRY	21	103	21103	Morphine	5	19	29588
2010	OH	HENRY	39	069	39069	Oxycodone	2	50	70999
2010	VA	HENRY	51	089	51089	Codeine	2	164	41462
2010	VA	HENRY	51	089	51089	Hydrocodone	12	164	41462
2010	VA	HENRY	51	089	51089	Tramadol	2	164	41462
2010	OH	HIGHLAND	39	071	39071	Heroin	92	527	70999
2010	OH	HIGHLAND	39	071	39071	Methadone	2	527	70999
2010	OH	HOCKING	39	073	39073	Buprenorphine	1	66	70999
2010	OH	HOCKING	39	073	39073	Hydrocodone	5	66	70999
2010	OH	HOLMES	39	075	39075	Methadone	1	129	70999
2010	KY	HOPKINS	21	107	21107	Hydromorphone	21	249	29588
2010	KY	HOPKINS	21	107	21107	Methorphan	1	249	29588
2010	OH	HURON	39	077	39077	Buprenorphine	2	240	70999
2010	OH	HURON	39	077	39077	Hydrocodone	9	240	70999
2010	VA	ISLE OF WIGHT	51	093	51093	Hydrocodone	3	169	41462
2010	OH	JACKSON	39	079	39079	Buprenorphine	6	632	70999
2010	OH	JACKSON	39	079	39079	Codeine	1	632	70999
2010	OH	JACKSON	39	079	39079	Morphine	5	632	70999
2010	VA	JAMES CITY	51	095	51095	Meperidine	3	237	41462
2010	KY	JEFFERSON	21	111	21111	Heroin	154	5426	29588
2010	KY	JEFFERSON	21	111	21111	Oxycodone	344	5426	29588
2010	KY	JEFFERSON	21	111	21111	Oxymorphone	18	5426	29588
2010	KY	JEFFERSON	21	111	21111	Pentazocine	3	5426	29588
2010	PA	JEFFERSON	42	065	42065	Methadone	1	200	89981
2010	KY	JESSAMINE	21	113	21113	Buprenorphine	13	316	29588
2010	KY	JESSAMINE	21	113	21113	Hydrocodone	23	316	29588
2010	KY	JOHNSON	21	115	21115	Methadone	5	243	29588
2010	KY	KENTON	21	117	21117	Methadone	11	1073	29588
2010	VA	KING GEORGE	51	099	51099	Hydromorphone	5	128	41462
2010	KY	KNOX	21	121	21121	Oxycodone	121	483	29588
2010	KY	KNOX	21	121	21121	Oxymorphone	1	483	29588
2010	OH	KNOX	39	083	39083	Heroin	1	31	70999
2010	PA	LACKAWANNA	42	069	42069	Fentanyl	1	1123	89981
2010	PA	LACKAWANNA	42	069	42069	Heroin	394	1123	89981
2010	PA	LACKAWANNA	42	069	42069	Methadone	5	1123	89981
2010	PA	LANCASTER	42	071	42071	Methadone	2	1683	89981
2010	KY	LARUE	21	123	21123	Methadone	2	74	29588
2010	KY	LAUREL	21	125	21125	Buprenorphine	7	623	29588
2010	KY	LAUREL	21	125	21125	Codeine	2	623	29588
2010	KY	LAUREL	21	125	21125	Hydrocodone	91	623	29588
2010	KY	LAUREL	21	125	21125	Morphine	1	623	29588
2010	OH	LAWRENCE	39	087	39087	Oxycodone	96	156	70999
2010	PA	LAWRENCE	42	073	42073	Hydrocodone	7	301	89981
2010	PA	LEBANON	42	075	42075	Oxycodone	13	648	89981
2010	KY	LEE	21	129	21129	Methadone	6	53	29588
2010	VA	LEE	51	105	51105	Morphine	4	108	41462
2010	PA	LEHIGH	42	077	42077	Hydromorphone	1	2385	89981
2010	KY	LETCHER	21	133	21133	Oxycodone	74	292	29588
2010	KY	LEWIS	21	135	21135	Oxycodone	31	59	29588
2010	KY	LIVINGSTON	21	139	21139	Methadone	1	26	29588
2010	WV	LOGAN	54	045	54045	Morphine	1	307	8668
2010	OH	LORAIN	39	093	39093	Buprenorphine	3	232	70999
2010	OH	LORAIN	39	093	39093	Morphine	1	232	70999
2010	VA	LOUISA	51	109	51109	Hydrocodone	4	184	41462
2010	OH	LUCAS	39	095	39095	Oxycodone	301	1995	70999
2010	OH	LUCAS	39	095	39095	Oxymorphone	4	1995	70999
2010	PA	LUZERNE	42	079	42079	Oxycodone	26	1448	89981
2010	VA	LYNCHBURG CITY	51	680	51680	Methadone	1	502	41462
2010	KY	LYON	21	143	21143	Hydrocodone	11	56	29588
2010	OH	MADISON	39	097	39097	Morphine	5	447	70999
2010	VA	MADISON	51	113	51113	Methadone	7	68	41462
2010	OH	MAHONING	39	099	39099	Fentanyl	1	2309	70999
2010	OH	MAHONING	39	099	39099	Heroin	358	2309	70999
2010	VA	LEXINGTON CITY	51	678	51678	Hydrocodone	1	17	41462
2010	OH	LICKING	39	089	39089	Buprenorphine	5	1639	70999
2010	OH	LICKING	39	089	39089	Codeine	1	1639	70999
2010	KY	LIVINGSTON	21	139	21139	Morphine	1	26	29588
2010	KY	LOGAN	21	141	21141	Hydrocodone	5	111	29588
2010	KY	LOGAN	21	141	21141	Oxycodone	1	111	29588
2010	KY	LOGAN	21	141	21141	Tramadol	2	111	29588
2010	WV	LOGAN	54	045	54045	Methadone	1	307	8668
2010	OH	LORAIN	39	093	39093	Heroin	14	232	70999
2010	VA	LOUDOUN	51	107	51107	Methadone	6	902	41462
2010	VA	LOUISA	51	109	51109	Hydromorphone	5	184	41462
2010	OH	LUCAS	39	095	39095	Hydrocodone	31	1995	70999
2010	VA	LUNENBURG	51	111	51111	Heroin	2	110	41462
2010	VA	LUNENBURG	51	111	51111	Tramadol	1	110	41462
2010	PA	LUZERNE	42	079	42079	Buprenorphine	20	1448	89981
2010	PA	LUZERNE	42	079	42079	Codeine	1	1448	89981
2010	PA	LYCOMING	42	081	42081	Codeine	3	683	89981
2010	PA	LYCOMING	42	081	42081	Morphine	3	683	89981
2010	VA	LYNCHBURG CITY	51	680	51680	Buprenorphine	2	502	41462
2010	VA	LYNCHBURG CITY	51	680	51680	Hydrocodone	7	502	41462
2010	KY	MADISON	21	151	21151	Heroin	2	465	29588
2010	OH	MADISON	39	097	39097	Heroin	41	447	70999
2010	OH	MADISON	39	097	39097	Methadone	5	447	70999
2010	OH	MADISON	39	097	39097	Propoxyphene	1	447	70999
2010	VA	MADISON	51	113	51113	Hydrocodone	2	68	41462
2010	VA	MADISON	51	113	51113	Tramadol	1	68	41462
2010	OH	MAHONING	39	099	39099	Hydromorphone	6	2309	70999
2010	OH	MAHONING	39	099	39099	Methadone	18	2309	70999
2010	KY	MARION	21	155	21155	Buprenorphine	4	133	29588
2010	WV	MARSHALL	54	051	54051	Fentanyl	1	126	8668
2010	WV	MARSHALL	54	051	54051	Heroin	7	126	8668
2010	KY	MARTIN	21	159	21159	Oxycodone	37	90	29588
2010	KY	MASON	21	161	21161	Propoxyphene	1	286	29588
2010	VA	MATHEWS	51	115	51115	Hydrocodone	3	40	41462
2010	KY	MCCRACKEN	21	145	21145	Hydrocodone	25	386	29588
2010	KY	MCCRACKEN	21	145	21145	Oxycodone	12	386	29588
2010	KY	MCCREARY	21	147	21147	Buprenorphine	4	136	29588
2010	KY	MCCREARY	21	147	21147	Hydrocodone	16	136	29588
2010	VA	MECKLENBURG	51	117	51117	Hydromorphone	1	171	41462
2010	VA	MECKLENBURG	51	117	51117	Methadone	4	171	41462
2010	OH	MEDINA	39	103	39103	Propoxyphene	3	744	70999
2010	OH	MEIGS	39	105	39105	Heroin	3	102	70999
2010	OH	MEIGS	39	105	39105	Methadone	2	102	70999
2010	KY	MERCER	21	167	21167	Methadone	2	86	29588
2010	OH	MERCER	39	107	39107	Hydromorphone	1	92	70999
2010	OH	MERCER	39	107	39107	Methadone	1	92	70999
2010	PA	MERCER	42	085	42085	Methadone	2	357	89981
2010	WV	MINERAL	54	057	54057	Oxycodone	1	104	8668
2010	OH	MONROE	39	111	39111	Oxycodone	1	2	70999
2010	PA	MONROE	42	089	42089	Hydrocodone	6	737	89981
2010	PA	MONROE	42	089	42089	Morphine	3	737	89981
2010	OH	MONTGOMERY	39	113	39113	Hydromorphone	5	7798	70999
2010	PA	MONTGOMERY	42	091	42091	Morphine	1	369	89981
2010	VA	MONTGOMERY	51	121	51121	Fentanyl	1	691	41462
2010	VA	MONTGOMERY	51	121	51121	Heroin	12	691	41462
2010	VA	MONTGOMERY	51	121	51121	Tramadol	4	691	41462
2010	PA	MONTOUR	42	093	42093	Heroin	1	13	89981
2010	PA	MONTOUR	42	093	42093	Methadone	1	13	89981
2010	OH	MORGAN	39	115	39115	Methadone	1	107	70999
2010	WV	MORGAN	54	065	54065	Buprenorphine	2	40	8668
2010	OH	MORROW	39	117	39117	Buprenorphine	1	198	70999
2010	KY	MUHLENBERG	21	177	21177	Oxycodone	6	143	29588
2010	KY	MUHLENBERG	21	177	21177	Oxymorphone	1	143	29588
2010	OH	MUSKINGUM	39	119	39119	Heroin	1	225	70999
2010	OH	MUSKINGUM	39	119	39119	Propoxyphene	1	225	70999
2010	VA	NELSON	51	125	51125	Oxycodone	1	94	41462
2010	VA	NEW KENT	51	127	51127	Oxycodone	6	105	41462
2010	VA	NEW KENT	51	127	51127	Oxymorphone	1	105	41462
2010	VA	NEWPORT NEWS CITY	51	700	51700	Fentanyl	1	1730	41462
2010	VA	NEWPORT NEWS CITY	51	700	51700	Oxycodone	25	1730	41462
2010	WV	NICHOLAS	54	067	54067	Heroin	1	199	8668
2010	PA	NORTHAMPTON	42	095	42095	Hydrocodone	14	2009	89981
2010	PA	NORTHUMBERLAND	42	097	42097	Oxycodone	3	164	89981
2010	WV	OHIO	54	069	54069	Dihydrocodeine	1	249	8668
2010	WV	OHIO	54	069	54069	Oxycodone	28	249	8668
2010	VA	ORANGE	51	137	51137	Hydrocodone	4	156	41462
2010	VA	ORANGE	51	137	51137	Tramadol	2	156	41462
2010	OH	OTTAWA	39	123	39123	Oxycodone	9	231	70999
2010	KY	OWEN	21	187	21187	Methadone	1	35	29588
2010	VA	PAGE	51	139	51139	Hydrocodone	12	154	41462
2010	VA	PAGE	51	139	51139	Tramadol	1	154	41462
2010	KY	PENDLETON	21	191	21191	Oxycodone	20	97	29588
2010	KY	PENDLETON	21	191	21191	Oxymorphone	1	97	29588
2010	OH	PERRY	39	127	39127	Oxycodone	17	211	70999
2010	VA	PETERSBURG CITY	51	730	51730	Buprenorphine	1	474	41462
2010	VA	PETERSBURG CITY	51	730	51730	Hydrocodone	2	474	41462
2010	PA	PHILADELPHIA	42	101	42101	Alphaprodine	1	33513	89981
2010	PA	PHILADELPHIA	42	101	42101	Hydrocodone	194	33513	89981
2010	KY	PIKE	21	195	21195	Buprenorphine	7	332	29588
2010	KY	PIKE	21	195	21195	Hydrocodone	59	332	29588
2010	KY	PIKE	21	195	21195	Propoxyphene	1	332	29588
2010	KY	PIKE	21	195	21195	Tramadol	2	332	29588
2010	OH	PIKE	39	131	39131	Methadone	5	251	70999
2010	PA	PIKE	42	103	42103	Oxycodone	13	144	89981
2010	VA	POQUOSON CITY	51	735	51735	Buprenorphine	1	33	41462
2010	OH	PORTAGE	39	133	39133	Buprenorphine	11	1263	70999
2010	OH	PORTAGE	39	133	39133	Fentanyl	2	1263	70999
2010	OH	PORTAGE	39	133	39133	Propoxyphene	1	1263	70999
2010	VA	PORTSMOUTH CITY	51	740	51740	Hydrocodone	2	841	41462
2010	VA	PORTSMOUTH CITY	51	740	51740	Morphine	3	841	41462
2010	OH	LUCAS	39	095	39095	Codeine	5	1995	70999
2010	VA	LUNENBURG	51	111	51111	Oxycodone	4	110	41462
2010	PA	LUZERNE	42	079	42079	Hydrocodone	9	1448	89981
2010	PA	LUZERNE	42	079	42079	Morphine	4	1448	89981
2010	PA	LYCOMING	42	081	42081	Buprenorphine	5	683	89981
2010	PA	LYCOMING	42	081	42081	Hydrocodone	3	683	89981
2010	PA	LYCOMING	42	081	42081	Propoxyphene	1	683	89981
2010	VA	LYNCHBURG CITY	51	680	51680	Codeine	2	502	41462
2010	KY	MADISON	21	151	21151	Oxycodone	191	465	29588
2010	KY	MADISON	21	151	21151	Tramadol	7	465	29588
2010	OH	MADISON	39	097	39097	Oxycodone	34	447	70999
2010	KY	MAGOFFIN	21	153	21153	Hydrocodone	4	57	29588
2010	KY	MARION	21	155	21155	Hydrocodone	5	133	29588
2010	KY	MARION	21	155	21155	Morphine	3	133	29588
2010	OH	MARION	39	101	39101	Hydromorphone	1	307	70999
2010	KY	MARTIN	21	159	21159	Hydrocodone	22	90	29588
2010	KY	MASON	21	161	21161	Hydrocodone	38	286	29588
2010	WV	MASON	54	053	54053	Buprenorphine	1	94	8668
2010	WV	MASON	54	053	54053	Hydrocodone	5	94	8668
2010	VA	MATHEWS	51	115	51115	Morphine	1	40	41462
2010	KY	MCCRACKEN	21	145	21145	Propoxyphene	2	386	29588
2010	WV	MCDOWELL	54	047	54047	Hydromorphone	2	99	8668
2010	KY	MCLEAN	21	149	21149	Oxycodone	2	65	29588
2010	OH	MEDINA	39	103	39103	Morphine	12	744	70999
2010	OH	MEDINA	39	103	39103	Oxymorphone	4	744	70999
2010	OH	MEIGS	39	105	39105	Oxycodone	22	102	70999
2010	OH	MEIGS	39	105	39105	Oxymorphone	2	102	70999
2010	PA	MERCER	42	085	42085	Oxycodone	27	357	89981
2010	WV	MERCER	54	055	54055	Dextropropoxyphene	1	587	8668
2010	WV	MERCER	54	055	54055	Hydromorphone	43	587	8668
2010	OH	MIAMI	39	109	39109	Buprenorphine	2	458	70999
2010	OH	MIAMI	39	109	39109	Hydrocodone	9	458	70999
2010	VA	MIDDLESEX	51	119	51119	Hydromorphone	1	30	41462
2010	WV	MINERAL	54	057	54057	Heroin	29	104	8668
2010	KY	MONROE	21	171	21171	Methadone	1	114	29588
2010	PA	MONROE	42	089	42089	Buprenorphine	7	737	89981
2010	PA	MONROE	42	089	42089	Codeine	2	737	89981
2010	KY	MONTGOMERY	21	173	21173	Methadone	9	230	29588
2010	PA	MONTGOMERY	42	091	42091	Buprenorphine	4	369	89981
2010	VA	MONTGOMERY	51	121	51121	Oxycodone	70	691	41462
2010	VA	MONTGOMERY	51	121	51121	Oxymorphone	1	691	41462
2010	KY	MORGAN	21	175	21175	Oxycodone	25	58	29588
2010	WV	MORGAN	54	065	54065	Hydrocodone	2	40	8668
2010	OH	MORROW	39	117	39117	Hydrocodone	5	198	70999
2010	KY	MUHLENBERG	21	177	21177	Methadone	1	143	29588
2010	KY	NELSON	21	179	21179	Oxycodone	8	148	29588
2010	VA	NEW KENT	51	127	51127	Heroin	3	105	41462
2010	VA	NEW KENT	51	127	51127	Methadone	1	105	41462
2010	VA	NEWPORT NEWS CITY	51	700	51700	Heroin	126	1730	41462
2010	VA	NEWPORT NEWS CITY	51	700	51700	Propoxyphene	2	1730	41462
2010	WV	NICHOLAS	54	067	54067	Oxycodone	53	199	8668
2010	WV	NICHOLAS	54	067	54067	Oxymorphone	1	199	8668
2010	OH	NOBLE	39	121	39121	Oxycodone	2	5	70999
2010	VA	NORFOLK CITY	51	710	51710	Methadone	3	1077	41462
2010	PA	NORTHUMBERLAND	42	097	42097	Methadone	1	164	89981
2010	KY	OHIO	21	183	21183	Hydrocodone	23	167	29588
2010	WV	OHIO	54	069	54069	Acetylcodeine	5	249	8668
2010	WV	OHIO	54	069	54069	Heroin	27	249	8668
2010	WV	OHIO	54	069	54069	Methadone	6	249	8668
2010	OH	OTTAWA	39	123	39123	Heroin	4	231	70999
2010	KY	OWSLEY	21	189	21189	Hydrocodone	6	31	29588
2010	VA	PATRICK	51	141	51141	Oxycodone	4	98	41462
2010	OH	PAULDING	39	125	39125	Propoxyphene	1	28	70999
2010	KY	PENDLETON	21	191	21191	Heroin	1	97	29588
2010	OH	PERRY	39	127	39127	Heroin	66	211	70999
2010	VA	PETERSBURG CITY	51	730	51730	Codeine	1	474	41462
2010	VA	PETERSBURG CITY	51	730	51730	Morphine	1	474	41462
2010	OH	PICKAWAY	39	129	39129	Buprenorphine	12	463	70999
2010	OH	PICKAWAY	39	129	39129	Hydrocodone	32	463	70999
2010	WV	POCAHONTAS	54	075	54075	Dextropropoxyphene	1	41	8668
2010	OH	PORTAGE	39	133	39133	Morphine	9	1263	70999
2010	VA	PORTSMOUTH CITY	51	740	51740	Buprenorphine	1	841	41462
2010	KY	POWELL	21	197	21197	Methadone	4	141	29588
2010	VA	POWHATAN	51	145	51145	Buprenorphine	2	197	41462
2010	VA	PRINCE WILLIAM	51	153	51153	Buprenorphine	12	1551	41462
2010	VA	PRINCE WILLIAM	51	153	51153	Hydrocodone	27	1551	41462
2010	KY	PULASKI	21	199	21199	Codeine	1	610	29588
2010	VA	PULASKI	51	155	51155	Buprenorphine	27	503	41462
2010	VA	PULASKI	51	155	51155	Propoxyphene	2	503	41462
2010	WV	RALEIGH	54	081	54081	Dextropropoxyphene	2	494	8668
2010	WV	RALEIGH	54	081	54081	Morphine	1	494	8668
2010	OH	RICHLAND	39	139	39139	Buprenorphine	7	617	70999
2010	OH	RICHLAND	39	139	39139	Hydrocodone	10	617	70999
2010	OH	RICHLAND	39	139	39139	Tramadol	3	617	70999
2010	WV	RITCHIE	54	085	54085	Hydrocodone	1	54	8668
2010	WV	ROANE	54	087	54087	Hydrocodone	2	21	8668
2010	VA	ROCKBRIDGE	51	163	51163	Fentanyl	1	186	41462
2010	VA	ROCKBRIDGE	51	163	51163	Oxycodone	12	186	41462
2010	VA	ROCKINGHAM	51	165	51165	Hydrocodone	7	413	41462
2010	VA	ROCKINGHAM	51	165	51165	Oxycodone	15	413	41462
2010	VA	ROCKINGHAM	51	165	51165	Tramadol	1	413	41462
2010	OH	ROSS	39	141	39141	Fentanyl	1	948	70999
2010	OH	ROSS	39	141	39141	Heroin	44	948	70999
2010	OH	ROSS	39	141	39141	Methadone	12	948	70999
2010	OH	ROSS	39	141	39141	Propoxyphene	2	948	70999
2010	KY	ROWAN	21	205	21205	Oxycodone	159	343	29588
2010	VA	RUSSELL	51	167	51167	Methadone	4	270	41462
2010	VA	SALEM	51	775	51775	Heroin	12	205	41462
2010	VA	SALEM	51	775	51775	Propoxyphene	1	205	41462
2010	OH	SCIOTO	39	145	39145	Buprenorphine	10	805	70999
2010	OH	LUCAS	39	095	39095	Hydromorphone	21	1995	70999
2010	OH	LUCAS	39	095	39095	Methadone	11	1995	70999
2010	PA	LUZERNE	42	079	42079	Heroin	382	1448	89981
2010	PA	LUZERNE	42	079	42079	Propoxyphene	2	1448	89981
2010	VA	LYNCHBURG CITY	51	680	51680	Hydromorphone	1	502	41462
2010	VA	LYNCHBURG CITY	51	680	51680	Tramadol	1	502	41462
2010	KY	MADISON	21	151	21151	Methadone	29	465	29588
2010	OH	MADISON	39	097	39097	Buprenorphine	2	447	70999
2010	VA	MADISON	51	113	51113	Oxycodone	6	68	41462
2010	KY	MAGOFFIN	21	153	21153	Heroin	1	57	29588
2010	OH	MAHONING	39	099	39099	Hydrocodone	65	2309	70999
2010	OH	MAHONING	39	099	39099	Oxycodone	116	2309	70999
2010	VA	MANASSAS CITY	51	683	51683	Heroin	28	171	41462
2010	VA	MANASSAS CITY	51	683	51683	Oxycodone	1	171	41462
2010	KY	MARION	21	155	21155	Heroin	1	133	29588
2010	KY	MARION	21	155	21155	Propoxyphene	1	133	29588
2010	OH	MARION	39	101	39101	Morphine	4	307	70999
2010	KY	MARSHALL	21	157	21157	Oxycodone	8	76	29588
2010	KY	MARSHALL	21	157	21157	Oxymorphone	1	76	29588
2010	WV	MARSHALL	54	051	54051	Morphine	1	126	8668
2010	KY	MARTIN	21	159	21159	Heroin	4	90	29588
2010	VA	MARTINSVILLE CITY	51	690	51690	Codeine	2	92	41462
2010	KY	MASON	21	161	21161	Buprenorphine	18	286	29588
2010	KY	MCCRACKEN	21	145	21145	Morphine	4	386	29588
2010	KY	MCCREARY	21	147	21147	Morphine	2	136	29588
2010	KY	MCCREARY	21	147	21147	Tramadol	1	136	29588
2010	PA	MCKEAN	42	083	42083	Hydrocodone	14	272	89981
2010	PA	MCKEAN	42	083	42083	Oxycodone	24	272	89981
2010	KY	MEADE	21	163	21163	Oxycodone	3	51	29588
2010	OH	MEDINA	39	103	39103	Codeine	2	744	70999
2010	KY	MERCER	21	167	21167	Buprenorphine	1	86	29588
2010	PA	MERCER	42	085	42085	Heroin	10	357	89981
2010	WV	MERCER	54	055	54055	Morphine	6	587	8668
2010	PA	MIFFLIN	42	087	42087	Buprenorphine	6	141	89981
2010	WV	MINERAL	54	057	54057	Hydrocodone	1	104	8668
2010	WV	MONONGALIA	54	061	54061	Heroin	219	337	8668
2010	KY	MONROE	21	171	21171	Morphine	6	114	29588
2010	PA	MONROE	42	089	42089	Oxycodone	37	737	89981
2010	WV	MONROE	54	063	54063	Buprenorphine	1	62	8668
2010	OH	MONTGOMERY	39	113	39113	Buprenorphine	22	7798	70999
2010	OH	MONTGOMERY	39	113	39113	Propoxyphene	6	7798	70999
2010	PA	MONTGOMERY	42	091	42091	Oxycodone	13	369	89981
2010	VA	MONTGOMERY	51	121	51121	Buprenorphine	20	691	41462
2010	OH	MORGAN	39	115	39115	Hydrocodone	14	107	70999
2010	OH	MORGAN	39	115	39115	Oxycodone	14	107	70999
2010	OH	MORROW	39	117	39117	Heroin	13	198	70999
2010	OH	MORROW	39	117	39117	Propoxyphene	1	198	70999
2010	VA	NEWPORT NEWS CITY	51	700	51700	Hydrocodone	29	1730	41462
2010	VA	NEWPORT NEWS CITY	51	700	51700	Tramadol	3	1730	41462
2010	WV	NICHOLAS	54	067	54067	Pentazocine	1	199	8668
2010	VA	NORFOLK CITY	51	710	51710	Hydromorphone	3	1077	41462
2010	VA	NORFOLK CITY	51	710	51710	Morphine	1	1077	41462
2010	PA	NORTHAMPTON	42	095	42095	Oxycodone	32	2009	89981
2010	PA	NORTHUMBERLAND	42	097	42097	Fentanyl	1	164	89981
2010	VA	NORTHUMBERLAND	51	133	51133	Oxycodone	3	32	41462
2010	KY	OHIO	21	183	21183	Buprenorphine	1	167	29588
2010	KY	OLDHAM	21	185	21185	Hydrocodone	20	106	29588
2010	KY	OLDHAM	21	185	21185	Oxycodone	21	106	29588
2010	VA	ORANGE	51	137	51137	Oxycodone	15	156	41462
2010	VA	ORANGE	51	137	51137	Oxymorphone	2	156	41462
2010	KY	OWEN	21	187	21187	Oxycodone	7	35	29588
2010	KY	OWSLEY	21	189	21189	Tramadol	1	31	29588
2010	VA	PAGE	51	139	51139	Hydromorphone	2	154	41462
2010	VA	PAGE	51	139	51139	Morphine	1	154	41462
2010	VA	PATRICK	51	141	51141	Methadone	3	98	41462
2010	OH	PAULDING	39	125	39125	Oxycodone	1	28	70999
2010	KY	PENDLETON	21	191	21191	Morphine	1	97	29588
2010	KY	PERRY	21	193	21193	Hydrocodone	83	599	29588
2010	KY	PERRY	21	193	21193	Methadone	69	599	29588
2010	PA	PHILADELPHIA	42	101	42101	Fentanyl	7	33513	89981
2010	PA	PHILADELPHIA	42	101	42101	Morphine	44	33513	89981
2010	OH	PIKE	39	131	39131	Heroin	6	251	70999
2010	PA	PIKE	42	103	42103	Fentanyl	2	144	89981
2010	VA	PITTSYLVANIA	51	143	51143	Hydrocodone	7	182	41462
2010	OH	PORTAGE	39	133	39133	Hydromorphone	3	1263	70999
2010	VA	PORTSMOUTH CITY	51	740	51740	Oxycodone	14	841	41462
2010	PA	POTTER	42	105	42105	Fentanyl	2	147	89981
2010	PA	POTTER	42	105	42105	Methadone	1	147	89981
2010	VA	POWHATAN	51	145	51145	Oxycodone	12	197	41462
2010	OH	PREBLE	39	135	39135	Buprenorphine	1	98	70999
2010	WV	PRESTON	54	077	54077	Buprenorphine	1	26	8668
2010	VA	PRINCE EDWARD	51	147	51147	Morphine	5	183	41462
2010	VA	PRINCE GEORGE	51	149	51149	Oxycodone	5	181	41462
2010	VA	PRINCE WILLIAM	51	153	51153	Meperidine	1	1551	41462
2010	KY	PULASKI	21	199	21199	Fentanyl	1	610	29588
2010	KY	PULASKI	21	199	21199	Hydromorphone	1	610	29588
2010	KY	PULASKI	21	199	21199	Morphine	4	610	29588
2010	VA	PULASKI	51	155	51155	Codeine	1	503	41462
2010	VA	PULASKI	51	155	51155	Oxycodone	50	503	41462
2010	VA	PULASKI	51	155	51155	Oxymorphone	4	503	41462
2010	WV	RALEIGH	54	081	54081	Hydromorphone	12	494	8668
2010	VA	RAPPAHANNOCK	51	157	51157	Propoxyphene	3	51	41462
2010	VA	RICHMOND	51	760	51760	Oxycodone	135	2884	41462
2010	VA	ROANOKE	51	770	51770	Buprenorphine	5	1103	41462
2010	KY	ROBERTSON	21	201	21201	Oxycodone	5	19	29588
2010	KY	ROCKCASTLE	21	203	21203	Morphine	4	198	29588
2010	VA	ROCKINGHAM	51	165	51165	Buprenorphine	2	413	41462
2010	VA	ROCKINGHAM	51	165	51165	Propoxyphene	1	413	41462
2010	OH	ROSS	39	141	39141	Morphine	8	948	70999
2010	KY	ROWAN	21	205	21205	Buprenorphine	7	343	29588
2010	OH	MAHONING	39	099	39099	Propoxyphene	5	2309	70999
2010	KY	MARION	21	155	21155	Methadone	4	133	29588
2010	OH	MARION	39	101	39101	Oxycodone	36	307	70999
2010	OH	MARION	39	101	39101	Oxymorphone	2	307	70999
2010	KY	MASON	21	161	21161	Hydromorphone	3	286	29588
2010	KY	MCCRACKEN	21	145	21145	Hydromorphone	3	386	29588
2010	WV	MCDOWELL	54	047	54047	Oxycodone	14	99	8668
2010	PA	MCKEAN	42	083	42083	Morphine	19	272	89981
2010	PA	MCKEAN	42	083	42083	Tramadol	1	272	89981
2010	KY	MEADE	21	163	21163	Tramadol	2	51	29588
2010	VA	MECKLENBURG	51	117	51117	Heroin	1	171	41462
2010	OH	MEDINA	39	103	39103	Methadone	2	744	70999
2010	KY	MERCER	21	167	21167	Oxycodone	13	86	29588
2010	KY	METCALFE	21	169	21169	Oxycodone	3	78	29588
2010	VA	MIDDLESEX	51	119	51119	Oxycodone	2	30	41462
2010	PA	MIFFLIN	42	087	42087	Oxycodone	6	141	89981
2010	WV	MINGO	54	059	54059	Oxycodone	77	180	8668
2010	WV	MONONGALIA	54	061	54061	Oxycodone	9	337	8668
2010	PA	MONROE	42	089	42089	Methadone	5	737	89981
2010	OH	MONTGOMERY	39	113	39113	Oxycodone	126	7798	70999
2010	OH	MONTGOMERY	39	113	39113	Oxymorphone	1	7798	70999
2010	VA	MONTGOMERY	51	121	51121	Hydromorphone	2	691	41462
2010	VA	MONTGOMERY	51	121	51121	Meperidine	1	691	41462
2010	KY	MORGAN	21	175	21175	Buprenorphine	3	58	29588
2010	KY	MORGAN	21	175	21175	Hydrocodone	3	58	29588
2010	KY	MORGAN	21	175	21175	Morphine	1	58	29588
2010	KY	MUHLENBERG	21	177	21177	Hydrocodone	22	143	29588
2010	KY	MUHLENBERG	21	177	21177	Hydromorphone	3	143	29588
2010	OH	MUSKINGUM	39	119	39119	Hydromorphone	1	225	70999
2010	KY	NELSON	21	179	21179	Methadone	1	148	29588
2010	PA	NORTHUMBERLAND	42	097	42097	Morphine	2	164	89981
2010	VA	NORTHUMBERLAND	51	133	51133	Hydrocodone	1	32	41462
2010	KY	OHIO	21	183	21183	Hydromorphone	2	167	29588
2010	KY	OHIO	21	183	21183	Oxycodone	13	167	29588
2010	WV	OHIO	54	069	54069	Dextropropoxyphene	2	249	8668
2010	WV	OHIO	54	069	54069	Morphine	13	249	8668
2010	KY	OLDHAM	21	185	21185	Heroin	3	106	29588
2010	KY	OLDHAM	21	185	21185	Propoxyphene	1	106	29588
2010	OH	OTTAWA	39	123	39123	Morphine	1	231	70999
2010	VA	PATRICK	51	141	51141	Morphine	2	98	41462
2010	KY	PERRY	21	193	21193	Heroin	1	599	29588
2010	KY	PERRY	21	193	21193	Tramadol	5	599	29588
2010	PA	PERRY	42	099	42099	Heroin	11	160	89981
2010	PA	PHILADELPHIA	42	101	42101	Acetylcodeine	1	33513	89981
2010	PA	PHILADELPHIA	42	101	42101	Hydromorphone	4	33513	89981
2010	OH	PICKAWAY	39	129	39129	Oxycodone	71	463	70999
2010	OH	PIKE	39	131	39131	Oxycodone	60	251	70999
2010	PA	PIKE	42	103	42103	Hydrocodone	3	144	89981
2010	VA	PITTSYLVANIA	51	143	51143	Oxycodone	5	182	41462
2010	WV	POCAHONTAS	54	075	54075	Oxycodone	7	41	8668
2010	VA	POQUOSON CITY	51	735	51735	Heroin	4	33	41462
2010	VA	POQUOSON CITY	51	735	51735	Methadone	1	33	41462
2010	VA	PORTSMOUTH CITY	51	740	51740	Methadone	1	841	41462
2010	KY	POWELL	21	197	21197	Buprenorphine	3	141	29588
2010	KY	POWELL	21	197	21197	Hydrocodone	6	141	29588
2010	OH	PREBLE	39	135	39135	Oxycodone	5	98	70999
2010	WV	PRESTON	54	077	54077	Hydrocodone	6	26	8668
2010	VA	PRINCE EDWARD	51	147	51147	Methadone	1	183	41462
2010	VA	PRINCE GEORGE	51	149	51149	Buprenorphine	3	181	41462
2010	VA	PRINCE GEORGE	51	149	51149	Hydrocodone	5	181	41462
2010	OH	PUTNAM	39	137	39137	Hydrocodone	1	38	70999
2010	WV	RALEIGH	54	081	54081	Heroin	14	494	8668
2010	VA	RAPPAHANNOCK	51	157	51157	Heroin	1	51	41462
2010	VA	RAPPAHANNOCK	51	157	51157	Methadone	1	51	41462
2010	OH	RICHLAND	39	139	39139	Methadone	5	617	70999
2010	VA	RICHMOND	51	760	51760	Propoxyphene	2	2884	41462
2010	VA	ROANOKE	51	770	51770	Fentanyl	3	1103	41462
2010	VA	ROANOKE	51	770	51770	Heroin	130	1103	41462
2010	VA	ROANOKE	51	770	51770	Propoxyphene	4	1103	41462
2010	VA	ROANOKE	51	770	51770	Tramadol	11	1103	41462
2010	KY	RUSSELL	21	207	21207	Fentanyl	2	122	29588
2010	KY	RUSSELL	21	207	21207	Oxycodone	5	122	29588
2010	VA	RUSSELL	51	167	51167	Buprenorphine	11	270	41462
2010	VA	RUSSELL	51	167	51167	Morphine	23	270	41462
2010	VA	SALEM	51	775	51775	Hydromorphone	2	205	41462
2010	OH	SANDUSKY	39	143	39143	Propoxyphene	3	158	70999
2010	PA	SCHUYLKILL	42	107	42107	Hydrocodone	24	733	89981
2010	OH	SCIOTO	39	145	39145	Oxycodone	379	805	70999
2010	OH	SCIOTO	39	145	39145	Oxymorphone	2	805	70999
2010	VA	SCOTT	51	169	51169	Buprenorphine	24	353	41462
2010	VA	SCOTT	51	169	51169	Codeine	3	353	41462
2010	VA	SCOTT	51	169	51169	Morphine	4	353	41462
2010	OH	SENECA	39	147	39147	Buprenorphine	4	225	70999
2010	OH	SENECA	39	147	39147	Codeine	1	225	70999
2010	OH	SENECA	39	147	39147	Hydrocodone	12	225	70999
2010	OH	SENECA	39	147	39147	Morphine	1	225	70999
2010	OH	SHELBY	39	149	39149	Fentanyl	3	383	70999
2010	OH	SHELBY	39	149	39149	Heroin	38	383	70999
2010	VA	SHENANDOAH	51	171	51171	Buprenorphine	6	369	41462
2010	VA	SHENANDOAH	51	171	51171	Codeine	1	369	41462
2010	VA	SHENANDOAH	51	171	51171	Hydrocodone	14	369	41462
2010	VA	SHENANDOAH	51	171	51171	Morphine	9	369	41462
2010	VA	SHENANDOAH	51	171	51171	Tramadol	5	369	41462
2010	KY	SIMPSON	21	213	21213	Hydrocodone	6	93	29588
[truncated: 22,063 more rows]

## Sheet: Column Codebook
YYYY	Year the evidence was received for analysis
State	State in which the evidence was taken into custody
County	County in which the evidence was taken into custody
FIPS_State	FIPS code representing state
FIPS_County	FIPS code representing county
FIPS_Combined	Combined state and county FIPS codes
SubstanceName	Name of the substance identified in the analysis
DrugReports	County total count of the indicated substance.
TotalDrugReportsCounty	County total count of all substances identified.
TotalDrugReportsState	State total count of all substances identified.
