# Supplementary material for: Evaluation of Policy Effectiveness by Mathematical Modeling for the Opioid Crisis with Spatial Study and Trend Analysis
Source: Healthcare (Basel). 2021 May 14;9(5):585. doi: 10.3390/healthcare9050585 (PMC8155830; doi:10.3390/healthcare9050585)
Supplement: Supplementary file 1 [file healthcare-09-00585-s001.zip › Table S3.xlsx]

## Sheet: Table S3
GEO.id	GEO.id2	GEO.display-label	HC01_VC03	HC02_VC03	HC03_VC03	HC04_VC03	HC01_VC04	HC02_VC04	HC03_VC04	HC04_VC04	HC01_VC06	HC02_VC06	HC03_VC06	HC04_VC06	HC01_VC07	HC02_VC07	HC03_VC07	HC04_VC07	HC01_VC08	HC02_VC08	HC03_VC08	HC04_VC08	HC01_VC09	HC02_VC09	HC03_VC09	HC04_VC09	HC01_VC10	HC02_VC10	HC03_VC10	HC04_VC10	HC01_VC11	HC02_VC11	HC03_VC11	HC04_VC11	HC01_VC12	HC02_VC12	HC03_VC12	HC04_VC12	HC01_VC13	HC02_VC13	HC03_VC13	HC04_VC13	HC01_VC14	HC02_VC14	HC03_VC14	HC04_VC14	HC01_VC15	HC02_VC15	HC03_VC15
Id	Id2	Geography	Estimate; HOUSEHOLDS BY TYPE - Total households	Margin of Error; HOUSEHOLDS BY TYPE - Total households	Percent; HOUSEHOLDS BY TYPE - Total households	Percent Margin of Error; HOUSEHOLDS BY TYPE - Total households	Estimate; HOUSEHOLDS BY TYPE - Family households (families)	Margin of Error; HOUSEHOLDS BY TYPE - Family households (families)	Percent; HOUSEHOLDS BY TYPE - Family households (families)	Percent Margin of Error; HOUSEHOLDS BY TYPE - Family households (families)	Estimate; HOUSEHOLDS BY TYPE - Family households (families) - With own children under 18 years	Margin of Error; HOUSEHOLDS BY TYPE - Family households (families) - With own children under 18 years	Percent; HOUSEHOLDS BY TYPE - Family households (families) - With own children under 18 years	Percent Margin of Error; HOUSEHOLDS BY TYPE - Family households (families) - With own children under 18 years	Estimate; HOUSEHOLDS BY TYPE - Family households (families) - Married-couple family	Margin of Error; HOUSEHOLDS BY TYPE - Family households (families) - Married-couple family	Percent; HOUSEHOLDS BY TYPE - Family households (families) - Married-couple family	Percent Margin of Error; HOUSEHOLDS BY TYPE - Family households (families) - Married-couple family	Estimate; HOUSEHOLDS BY TYPE - Family households (families) - Married-couple family - With own children under 18 years	Margin of Error; HOUSEHOLDS BY TYPE - Family households (families) - Married-couple family - With own children under 18 years	Percent; HOUSEHOLDS BY TYPE - Family households (families) - Married-couple family - With own children under 18 years	Percent Margin of Error; HOUSEHOLDS BY TYPE - Family households (families) - Married-couple family - With own children under 18 years	Estimate; HOUSEHOLDS BY TYPE - Family households (families) - Male householder, no wife present, family	Margin of Error; HOUSEHOLDS BY TYPE - Family households (families) - Male householder, no wife present, family	Percent; HOUSEHOLDS BY TYPE - Family households (families) - Male householder, no wife present, family	Percent Margin of Error; HOUSEHOLDS BY TYPE - Family households (families) - Male householder, no wife present, family	Estimate; HOUSEHOLDS BY TYPE - Family households (families) - Male householder, no wife present, family - With own children under 18 years	Margin of Error; HOUSEHOLDS BY TYPE - Family households (families) - Male householder, no wife present, family - With own children under 18 years	Percent; HOUSEHOLDS BY TYPE - Family households (families) - Male householder, no wife present, family - With own children under 18 years	Percent Margin of Error; HOUSEHOLDS BY TYPE - Family households (families) - Male householder, no wife present, family - With own children under 18 years	Estimate; HOUSEHOLDS BY TYPE - Family households (families) - Female householder, no husband present, family	Margin of Error; HOUSEHOLDS BY TYPE - Family households (families) - Female householder, no husband present, family	Percent; HOUSEHOLDS BY TYPE - Family households (families) - Female householder, no husband present, family	Percent Margin of Error; HOUSEHOLDS BY TYPE - Family households (families) - Female householder, no husband present, family	Estimate; HOUSEHOLDS BY TYPE - Family households (families) - Female householder, no husband present, family - With own children under 18 years	Margin of Error; HOUSEHOLDS BY TYPE - Family households (families) - Female householder, no husband present, family - With own children under 18 years	Percent; HOUSEHOLDS BY TYPE - Family households (families) - Female householder, no husband present, family - With own children under 18 years	Percent Margin of Error; HOUSEHOLDS BY TYPE - Family households (families) - Female householder, no husband present, family - With own children under 18 years	Estimate; HOUSEHOLDS BY TYPE - Nonfamily households	Margin of Error; HOUSEHOLDS BY TYPE - Nonfamily households	Percent; HOUSEHOLDS BY TYPE - Nonfamily households	Percent Margin of Error; HOUSEHOLDS BY TYPE - Nonfamily households	Estimate; HOUSEHOLDS BY TYPE - Nonfamily households - Householder living alone	Margin of Error; HOUSEHOLDS BY TYPE - Nonfamily households - Householder living alone	Percent; HOUSEHOLDS BY TYPE - Nonfamily households - Householder living alone	Percent Margin of Error; HOUSEHOLDS BY TYPE - Nonfamily households - Householder living alone	Estimate; HOUSEHOLDS BY TYPE - Nonfamily households - Householder living alone - 65 years and over	Margin of Error; HOUSEHOLDS BY TYPE - Nonfamily households - Householder living alone - 65 years and over	Percent; HOUSEHOLDS BY TYPE - Nonfamily households - Householder living alone - 65 years and over
0500000US21001	21001	Adair County, Kentucky	7193	267	7193	(X)	4754	299	66.1	3.6	1730	213	24.1	2.6	3844	309	53.4	4	1264	186	17.6	2.4	394	114	5.5	1.6	190	93	2.6	1.3	516	148	7.2	2	276	115	3.8	1.6	2439	278	33.9	3.6	2169	288	30.2	3.8	1024	182	14.2
0500000US21003	21003	Allen County, Kentucky	7849	252	7849	(X)	5454	333	69.5	3.4	2259	265	28.8	3.2	4058	290	51.7	3.3	1526	205	19.4	2.5	401	132	5.1	1.7	187	106	2.4	1.4	995	186	12.7	2.3	546	158	7	2	2395	268	30.5	3.4	2109	259	26.9	3.2	813	133	10.4
0500000US21005	21005	Anderson County, Kentucky	8386	1558	8386	(X)	6008	1500	71.6	4.4	2753	632	32.8	3.2	4608	1165	54.9	4.4	1929	613	23	3.4	271	114	3.2	1.4	180	92	2.1	1.1	1129	408	13.5	2.7	644	199	7.7	2.5	2378	299	28.4	4.4	1876	259	22.4	4.4	720	135	8.6
0500000US21007	21007	Ballard County, Kentucky	3358	145	3358	(X)	2327	138	69.3	3.9	870	102	25.9	2.7	1942	142	57.8	4.3	650	101	19.4	2.8	163	62	4.9	1.8	102	44	3	1.3	222	61	6.6	1.8	118	44	3.5	1.3	1031	149	30.7	3.9	857	130	25.5	3.4	416	62	12.4
0500000US21009	21009	Barren County, Kentucky	16708	393	16708	(X)	11780	450	70.5	2.1	5041	317	30.2	1.7	9083	447	54.4	2.3	3590	313	21.5	1.8	569	172	3.4	1	219	82	1.3	0.5	2128	291	12.7	1.7	1232	234	7.4	1.4	4928	360	29.5	2.1	4354	367	26.1	2.1	2158	193	12.9
0500000US21011	21011	Bath County, Kentucky	4306	184	4306	(X)	3008	217	69.9	4.5	1420	181	33	4.1	2287	206	53.1	4.5	886	157	20.6	3.7	114	83	2.6	1.9	75	76	1.7	1.7	607	149	14.1	3.4	459	132	10.7	3	1298	212	30.1	4.5	1160	186	26.9	4.1	458	96	10.6
0500000US21013	21013	Bell County, Kentucky	10632	330	10632	(X)	7237	359	68.1	2.8	2856	279	26.9	2.3	4988	295	46.9	2.7	1720	205	16.2	1.8	626	163	5.9	1.5	264	124	2.5	1.2	1623	246	15.3	2.2	872	185	8.2	1.7	3395	319	31.9	2.8	3084	272	29	2.4	1429	188	13.4
0500000US21015	21015	Boone County, Kentucky	41843	549	41843	(X)	30860	723	73.8	1.4	15534	563	37.1	1.2	25095	776	60	1.8	12262	496	29.3	1.2	1737	312	4.2	0.7	953	221	2.3	0.5	4028	426	9.6	1	2319	381	5.5	0.9	10983	621	26.2	1.4	8917	539	21.3	1.3	2399	246	5.7
0500000US21017	21017	Bourbon County, Kentucky	7933	270	7933	(X)	5449	312	68.7	3.3	2398	219	30.2	2.6	3902	264	49.2	3.1	1654	184	20.8	2.3	280	103	3.5	1.3	135	80	1.7	1	1267	182	16	2.1	609	139	7.7	1.7	2484	285	31.3	3.3	2162	258	27.3	3.1	876	168	11
0500000US21019	21019	Boyd County, Kentucky	19521	355	19521	(X)	12961	413	66.4	1.9	5011	340	25.7	1.6	9674	453	49.6	2.2	3370	298	17.3	1.4	938	195	4.8	1	408	152	2.1	0.8	2349	286	12	1.4	1233	247	6.3	1.2	6560	398	33.6	1.9	5830	405	29.9	1.9	2672	279	13.7
0500000US21021	21021	Boyle County, Kentucky	10916	323	10916	(X)	7520	327	68.9	2.6	3174	232	29.1	1.9	5400	294	49.5	2.6	1945	196	17.8	1.7	472	126	4.3	1.1	278	93	2.5	0.8	1648	241	15.1	2.2	951	187	8.7	1.7	3396	313	31.1	2.6	2986	284	27.4	2.3	1186	173	10.9
0500000US21023	21023	Bracken County, Kentucky	3070	145	3070	(X)	2130	155	69.4	4	919	116	29.9	3.3	1581	152	51.5	4.6	653	108	21.3	3.3	178	72	5.8	2.3	71	51	2.3	1.7	371	76	12.1	2.4	195	59	6.4	1.9	940	132	30.6	4	838	126	27.3	3.8	502	97	16.4
0500000US21025	21025	Breathitt County, Kentucky	5314	225	5314	(X)	3566	259	67.1	3.7	1339	192	25.2	3.2	2474	255	46.6	4.5	757	151	14.2	2.7	316	98	5.9	1.8	94	68	1.8	1.3	776	175	14.6	3.2	488	137	9.2	2.5	1748	206	32.9	3.7	1638	206	30.8	3.8	662	113	12.5
0500000US21027	21027	Breckinridge County, Kentucky	7519	286	7519	(X)	5400	324	71.8	3.2	1937	243	25.8	3	4317	344	57.4	3.8	1419	222	18.9	2.8	328	93	4.4	1.2	230	90	3.1	1.2	755	169	10	2.2	288	107	3.8	1.4	2119	245	28.2	3.2	1786	226	23.8	2.9	763	148	10.1
0500000US21029	21029	Bullitt County, Kentucky	27705	273	27705	(X)	20565	485	74.2	1.7	9291	467	33.5	1.7	16061	580	58	2.1	6519	466	23.5	1.7	1429	283	5.2	1	801	210	2.9	0.8	3075	417	11.1	1.5	1971	350	7.1	1.3	7140	489	25.8	1.7	5846	533	21.1	1.9	2017	251	7.3
0500000US21031	21031	Butler County, Kentucky	5081	190	5081	(X)	3556	229	70	4.1	1455	168	28.6	3.3	2864	264	56.4	4.8	1032	171	20.3	3.3	174	75	3.4	1.5	100	65	2	1.3	518	142	10.2	2.8	323	110	6.4	2.2	1525	227	30	4.1	1337	222	26.3	4.1	557	124	11
0500000US21033	21033	Caldwell County, Kentucky	5047	266	5047	(X)	3206	259	63.5	4.1	1094	188	21.7	3.4	2493	242	49.4	3.9	732	167	14.5	3	233	102	4.6	2	96	58	1.9	1.2	480	129	9.5	2.5	266	104	5.3	2.1	1841	231	36.5	4.1	1687	227	33.4	4.1	787	199	15.6
0500000US21035	21035	Calloway County, Kentucky	14967	453	14967	(X)	8998	373	60.1	2.4	3565	257	23.8	1.7	7394	364	49.4	2.4	2739	236	18.3	1.6	444	133	3	0.9	236	101	1.6	0.7	1160	214	7.8	1.4	590	169	3.9	1.1	5969	461	39.9	2.4	4634	409	31	2.5	1721	226	11.5
0500000US21037	21037	Campbell County, Kentucky	35258	495	35258	(X)	22386	527	63.5	1.4	9573	407	27.2	1.1	16835	562	47.7	1.4	6707	364	19	1	1422	233	4	0.7	658	154	1.9	0.4	4129	384	11.7	1.1	2208	298	6.3	0.9	12872	547	36.5	1.4	11072	540	31.4	1.4	3589	312	10.2
0500000US21039	21039	Carlisle County, Kentucky	2018	112	2018	(X)	1470	118	72.8	4.4	614	102	30.4	4.5	1203	131	59.6	5.2	492	106	24.4	4.7	75	37	3.7	1.8	28	25	1.4	1.2	192	59	9.5	3	94	47	4.7	2.4	548	96	27.2	4.4	499	82	24.7	3.7	323	67	16
0500000US21041	21041	Carroll County, Kentucky	4195	152	4195	(X)	3062	205	73	4.2	1340	166	31.9	3.7	2025	239	48.3	5.4	652	150	15.5	3.5	435	133	10.4	3.1	291	113	6.9	2.7	602	170	14.4	4	397	143	9.5	3.4	1133	182	27	4.2	890	161	21.2	3.7	384	100	9.2
0500000US21043	21043	Carter County, Kentucky	10407	335	10407	(X)	7287	338	70	2.9	2604	203	25	1.7	5988	338	57.5	3	2011	188	19.3	1.7	438	132	4.2	1.3	224	105	2.2	1	861	190	8.3	1.8	369	108	3.5	1	3120	334	30	2.9	2754	294	26.5	2.5	1231	181	11.8
0500000US21045	21045	Casey County, Kentucky	6032	318	6032	(X)	4178	322	69.3	4.2	1729	296	28.7	4.3	3415	288	56.6	4.3	1223	234	20.3	3.6	277	115	4.6	1.9	250	114	4.1	1.9	486	165	8.1	2.6	256	148	4.2	2.4	1854	279	30.7	4.2	1716	277	28.4	4.2	821	174	13.6
0500000US21047	21047	Christian County, Kentucky	26117	389	26117	(X)	18771	488	71.9	1.7	10213	418	39.1	1.5	13615	560	52.1	2.2	6872	464	26.3	1.7	1038	215	4	0.8	478	165	1.8	0.6	4118	375	15.8	1.4	2863	340	11	1.3	7346	482	28.1	1.7	6620	462	25.3	1.7	2245	258	8.6
0500000US21049	21049	Clark County, Kentucky	14406	275	14406	(X)	10295	346	71.5	2.1	4199	317	29.1	2.1	7730	344	53.7	2.4	2800	258	19.4	1.8	732	203	5.1	1.4	337	137	2.3	0.9	1833	250	12.7	1.7	1062	211	7.4	1.4	4111	316	28.5	2.1	3479	303	24.1	2.1	1618	186	11.2
0500000US21051	21051	Clay County, Kentucky	6731	340	6731	(X)	4612	354	68.5	4	1585	214	23.5	3	3322	305	49.4	3.8	1191	202	17.7	2.8	428	155	6.4	2.3	127	67	1.9	1	862	166	12.8	2.4	267	98	4	1.5	2119	295	31.5	4	1941	274	28.8	3.8	771	176	11.5
0500000US21053	21053	Clinton County, Kentucky	3986	273	3986	(X)	2773	221	69.6	4.1	1126	189	28.2	3.8	1950	213	48.9	5.6	595	156	14.9	3.7	289	143	7.3	3.4	200	116	5	2.8	534	146	13.4	3.5	331	107	8.3	2.6	1213	198	30.4	4.1	1150	201	28.9	4.1	553	141	13.9
0500000US21055	21055	Crittenden County, Kentucky	3855	169	3855	(X)	2402	169	62.3	3.8	860	133	22.3	3.5	1916	168	49.7	4.1	640	127	16.6	3.3	170	86	4.4	2.2	32	31	0.8	0.8	316	91	8.2	2.4	188	79	4.9	2	1453	166	37.7	3.8	1361	164	35.3	3.9	553	99	14.3
0500000US21057	21057	Cumberland County, Kentucky	2668	157	2668	(X)	1813	168	68	4.7	662	121	24.8	3.9	1369	163	51.3	5.5	413	127	15.5	4.5	113	57	4.2	2.1	16	19	0.6	0.7	331	104	12.4	3.7	233	88	8.7	3.2	855	132	32	4.7	808	128	30.3	4.5	348	90	13
0500000US21059	21059	Daviess County, Kentucky	37279	578	37279	(X)	25144	569	67.4	1.4	10799	457	29	1.1	19265	641	51.7	1.6	7206	458	19.3	1.2	1513	254	4.1	0.7	835	189	2.2	0.5	4366	405	11.7	1.1	2758	331	7.4	0.9	12135	599	32.6	1.4	10636	588	28.5	1.4	4339	333	11.6
0500000US21061	21061	Edmonson County, Kentucky	4770	227	4770	(X)	3471	244	72.8	4.1	1316	181	27.6	3.6	2863	252	60	4.7	956	173	20	3.6	152	85	3.2	1.8	51	36	1.1	0.8	456	133	9.6	2.8	309	121	6.5	2.5	1299	210	27.2	4.1	1172	206	24.6	4	498	135	10.4
0500000US21063	21063	Elliott County, Kentucky	2602	213	2602	(X)	1865	197	71.7	5.5	736	142	28.3	4.4	1398	202	53.7	6.2	500	132	19.2	4.2	152	62	5.8	2.3	44	45	1.7	1.7	315	84	12.1	3.3	192	82	7.4	3.2	737	160	28.3	5.5	609	155	23.4	5.6	215	80	8.3
0500000US21065	21065	Estill County, Kentucky	5680	226	5680	(X)	3891	283	68.5	4	1636	225	28.8	3.7	2965	314	52.2	4.7	1086	215	19.1	3.5	175	90	3.1	1.6	60	48	1.1	0.8	751	176	13.2	3.1	490	161	8.6	2.9	1789	234	31.5	4	1565	234	27.6	4	733	150	12.9
0500000US21067	21067	Fayette County, Kentucky	122075	1088	122075	(X)	71215	1070	58.3	0.9	33649	875	27.6	0.7	51166	1033	41.9	0.9	21561	818	17.7	0.7	5201	552	4.3	0.4	2855	432	2.3	0.4	14848	755	12.2	0.6	9233	600	7.6	0.5	50860	1278	41.7	0.9	39558	1212	32.4	0.9	9472	510	7.8
0500000US21069	21069	Fleming County, Kentucky	5611	175	5611	(X)	3933	204	70.1	3.6	1628	190	29	3.4	3257	230	58	4.1	1301	183	23.2	3.2	232	84	4.1	1.5	75	55	1.3	1	444	143	7.9	2.6	252	133	4.5	2.4	1678	220	29.9	3.6	1564	207	27.9	3.5	757	127	13.5
0500000US21071	21071	Floyd County, Kentucky	15562	401	15562	(X)	10614	474	68.2	2.2	3962	396	25.5	2.3	7869	448	50.6	2.6	2721	339	17.5	2.1	770	221	4.9	1.4	394	153	2.5	1	1975	323	12.7	2	847	242	5.4	1.5	4948	337	31.8	2.2	4261	294	27.4	1.9	1544	219	9.9
0500000US21073	21073	Franklin County, Kentucky	20936	450	20936	(X)	12717	498	60.7	2.3	5742	388	27.4	1.6	9019	453	43.1	2.2	3463	325	16.5	1.5	951	241	4.5	1.1	596	202	2.8	1	2747	345	13.1	1.6	1683	304	8	1.4	8219	543	39.3	2.3	6998	504	33.4	2.2	2221	243	10.6
0500000US21075	21075	Fulton County, Kentucky	2876	134	2876	(X)	2041	161	71	4.9	871	133	30.3	4.1	1375	136	47.8	4.6	466	97	16.2	3.2	190	84	6.6	2.9	71	56	2.5	1.9	476	109	16.6	3.7	334	95	11.6	3.3	835	150	29	4.9	788	149	27.4	4.9	323	86	11.2
0500000US21077	21077	Gallatin County, Kentucky	2988	175	2988	(X)	2002	198	67	5.7	713	115	23.9	3.6	1555	194	52	6.4	531	113	17.8	3.7	162	78	5.4	2.6	98	65	3.3	2.2	285	109	9.5	3.5	84	53	2.8	1.7	986	184	33	5.7	836	154	28	4.8	260	91	8.7
0500000US21079	21079	Garrard County, Kentucky	6388	243	6388	(X)	4683	285	73.3	3.4	1932	232	30.2	3.2	3740	293	58.5	4.2	1472	211	23	3.1	312	148	4.9	2.3	121	105	1.9	1.6	631	157	9.9	2.4	339	132	5.3	2.1	1705	223	26.7	3.4	1463	220	22.9	3.3	744	146	11.6
0500000US21081	21081	Grant County, Kentucky	8755	241	8755	(X)	6953	283	79.4	2.4	3487	254	39.8	2.5	5274	341	60.2	3.6	2501	268	28.6	2.9	303	104	3.5	1.2	203	96	2.3	1.1	1376	244	15.7	2.8	783	183	8.9	2.1	1802	221	20.6	2.4	1480	208	16.9	2.3	450	96	5.1
0500000US21083	21083	Graves County, Kentucky	14789	318	14789	(X)	10295	344	69.6	2.1	4408	251	29.8	1.6	8404	360	56.8	2.3	3347	257	22.6	1.7	390	120	2.6	0.8	232	97	1.6	0.6	1501	235	10.1	1.6	829	176	5.6	1.2	4494	343	30.4	2.1	4175	339	28.2	2.1	1833	203	12.4
0500000US21085	21085	Grayson County, Kentucky	9939	277	9939	(X)	6845	325	68.9	2.8	2949	263	29.7	2.4	5617	336	56.5	3.1	2126	255	21.4	2.5	281	107	2.8	1.1	208	101	2.1	1	947	230	9.5	2.3	615	208	6.2	2.1	3094	305	31.1	2.8	2759	277	27.8	2.6	1300	208	13.1
0500000US21087	21087	Green County, Kentucky	4422	186	4422	(X)	3299	189	74.6	3.4	1327	138	30	2.6	2645	173	59.8	3.6	935	121	21.1	2.6	144	88	3.3	2	108	85	2.4	1.9	510	103	11.5	2.2	284	91	6.4	2	1123	163	25.4	3.4	1083	168	24.5	3.5	527	111	11.9
0500000US21089	21089	Greenup County, Kentucky	14309	271	14309	(X)	10013	390	70	2.6	3675	250	25.7	1.8	7761	370	54.2	2.5	2577	228	18	1.6	510	160	3.6	1.1	214	88	1.5	0.6	1742	248	12.2	1.7	884	179	6.2	1.3	4296	387	30	2.6	3978	382	27.8	2.6	1583	208	11.1
0500000US21091	21091	Hancock County, Kentucky	3309	123	3309	(X)	2486	183	75.1	4.7	1052	129	31.8	3.5	2015	162	60.9	4.7	759	108	22.9	3.1	162	78	4.9	2.3	106	62	3.2	1.8	309	92	9.3	2.8	187	63	5.7	1.9	823	155	24.9	4.7	741	147	22.4	4.5	227	60	6.9
0500000US21093	21093	Hardin County, Kentucky	37883	656	37883	(X)	27431	711	72.4	1.5	13222	596	34.9	1.4	20456	736	54	1.8	8822	571	23.3	1.4	1773	350	4.7	0.9	1095	299	2.9	0.8	5202	445	13.7	1.1	3305	360	8.7	0.9	10452	628	27.6	1.5	9139	609	24.1	1.5	2945	289	7.8
0500000US21095	21095	Harlan County, Kentucky	10642	345	10642	(X)	7268	348	68.3	2.8	2853	251	26.8	2.2	5009	269	47.1	2.7	1876	218	17.6	2	674	184	6.3	1.7	295	121	2.8	1.1	1585	243	14.9	2.1	682	150	6.4	1.4	3374	332	31.7	2.8	3078	314	28.9	2.7	1338	180	12.6
0500000US21097	21097	Harrison County, Kentucky	7172	296	7172	(X)	4694	315	65.4	4	2080	245	29	3	3781	321	52.7	4.1	1519	245	21.2	3.1	168	77	2.3	1.1	35	34	0.5	0.5	745	181	10.4	2.5	526	170	7.3	2.4	2478	320	34.6	4	2056	278	28.7	3.5	793	172	11.1
0500000US21099	21099	Hart County, Kentucky	6892	272	6892	(X)	4862	289	70.5	2.9	2099	213	30.5	2.5	3686	252	53.5	3.1	1324	183	19.2	2.4	280	92	4.1	1.3	187	91	2.7	1.3	896	168	13	2.3	588	146	8.5	2.1	2030	211	29.5	2.9	1879	201	27.3	2.9	811	163	11.8
0500000US21101	21101	Henderson County, Kentucky	18652	330	18652	(X)	12297	449	65.9	2.2	5195	354	27.9	1.8	9569	406	51.3	2.1	3549	345	19	1.8	512	133	2.7	0.7	290	111	1.6	0.6	2216	295	11.9	1.5	1356	265	7.3	1.4	6355	432	34.1	2.2	5694	372	30.5	1.9	2170	225	11.6
0500000US21103	21103	Henry County, Kentucky	6023	160	6023	(X)	4350	207	72.2	2.8	1829	178	30.4	2.9	3236	240	53.7	3.6	1115	164	18.5	2.6	292	80	4.8	1.3	118	51	2	0.8	822	153	13.6	2.6	596	130	9.9	2.2	1673	174	27.8	2.8	1392	160	23.1	2.6	598	103	9.9
0500000US21105	21105	Hickman County, Kentucky	1983	107	1983	(X)	1185	124	59.8	5.9	477	86	24.1	4.2	988	128	49.8	6.3	370	86	18.7	4.3	30	24	1.5	1.2	18	20	0.9	1	167	51	8.4	2.5	89	44	4.5	2.2	798	130	40.2	5.9	736	132	37.1	6.1	404	123	20.4
0500000US21107	21107	Hopkins County, Kentucky	18518	345	18518	(X)	12881	397	69.6	1.9	5509	312	29.7	1.6	9898	362	53.5	2	3592	313	19.4	1.7	756	208	4.1	1.1	515	183	2.8	1	2227	258	12	1.3	1402	217	7.6	1.2	5637	377	30.4	1.9	5114	350	27.6	1.8	2109	215	11.4
0500000US21109	21109	Jackson County, Kentucky	5569	231	5569	(X)	3924	286	70.5	4.4	1499	212	26.9	3.4	2735	264	49.1	4.8	821	179	14.7	3.2	291	134	5.2	2.4	174	99	3.1	1.8	898	198	16.1	3.4	504	167	9.1	2.9	1645	255	29.5	4.4	1475	255	26.5	4.4	651	154	11.7
0500000US21111	21111	Jefferson County, Kentucky	301312	1359	301312	(X)	186142	1525	61.8	0.5	82900	1349	27.5	0.4	128614	1403	42.7	0.5	49887	1121	16.6	0.4	12811	784	4.3	0.3	6379	633	2.1	0.2	44717	1213	14.8	0.4	26634	1043	8.8	0.3	115170	1716	38.2	0.5	98305	1553	32.6	0.5	30156	981	10
0500000US21113	21113	Jessamine County, Kentucky	17797	301	17797	(X)	13391	437	75.2	2.3	6727	362	37.8	1.9	10429	397	58.6	2.1	4892	349	27.5	1.8	683	198	3.8	1.1	461	161	2.6	0.9	2279	314	12.8	1.7	1374	275	7.7	1.5	4406	423	24.8	2.3	3549	400	19.9	2.2	1103	201	6.2
0500000US21115	21115	Johnson County, Kentucky	9397	276	9397	(X)	6919	383	73.6	3.2	2748	298	29.2	2.8	5308	378	56.5	3.6	1987	271	21.1	2.7	366	135	3.9	1.4	125	87	1.3	0.9	1245	239	13.2	2.5	636	195	6.8	2	2478	302	26.4	3.2	2289	299	24.4	3.2	929	174	9.9
0500000US21117	21117	Kenton County, Kentucky	62054	601	62054	(X)	40479	682	65.2	1	19194	597	30.9	0.9	29936	748	48.2	1.2	12871	507	20.7	0.8	2682	334	4.3	0.5	1387	221	2.2	0.4	7861	469	12.7	0.8	4936	408	8	0.7	21575	686	34.8	1	17964	701	28.9	1.1	5486	367	8.8
0500000US21119	21119	Knott County, Kentucky	5878	246	5878	(X)	4226	247	71.9	3.7	1480	167	25.2	2.7	3105	240	52.8	4	992	171	16.9	2.9	335	121	5.7	2.1	99	58	1.7	1	786	156	13.4	2.5	389	103	6.6	1.7	1652	244	28.1	3.7	1499	221	25.5	3.4	652	127	11.1
0500000US21121	21121	Knox County, Kentucky	12541	312	12541	(X)	8142	450	64.9	3.1	3263	324	26	2.4	5950	402	47.4	3.2	2045	245	16.3	1.9	585	170	4.7	1.3	283	134	2.3	1.1	1607	309	12.8	2.4	935	256	7.5	2	4399	396	35.1	3.1	4020	379	32.1	3	1597	232	12.7
0500000US21123	21123	Larue County, Kentucky	5035	228	5035	(X)	3466	221	68.8	3.5	1329	173	26.4	3	2785	187	55.3	3.2	974	154	19.3	2.8	188	91	3.7	1.8	99	78	2	1.6	493	125	9.8	2.4	256	87	5.1	1.7	1569	198	31.2	3.5	1423	192	28.3	3.4	563	133	11.2
0500000US21125	21125	Laurel County, Kentucky	22002	438	22002	(X)	16457	414	74.8	1.8	6983	420	31.7	1.8	12228	464	55.6	2.3	4635	408	21.1	1.9	1237	259	5.6	1.2	684	186	3.1	0.8	2992	359	13.6	1.6	1664	282	7.6	1.3	5545	456	25.2	1.8	4687	415	21.3	1.7	1606	202	7.3
0500000US21127	21127	Lawrence County, Kentucky	5800	253	5800	(X)	4176	277	72	3.6	1589	209	27.4	3.2	3234	278	55.8	4.4	1133	198	19.5	3.3	158	77	2.7	1.3	71	48	1.2	0.8	784	161	13.5	2.6	385	131	6.6	2.2	1624	226	28	3.6	1385	223	23.9	3.7	728	153	12.6
0500000US21129	21129	Lee County, Kentucky	2827	195	2827	(X)	1971	201	69.7	5.2	762	157	27	4.8	1521	176	53.8	5.4	516	127	18.3	4.3	167	91	5.9	3.1	96	78	3.4	2.7	283	89	10	3	150	74	5.3	2.5	856	156	30.3	5.2	810	153	28.7	5.1	272	82	9.6
0500000US21131	21131	Leslie County, Kentucky	4428	206	4428	(X)	3045	247	68.8	5.2	1232	176	27.8	3.7	2445	245	55.2	5.4	922	164	20.8	3.7	104	61	2.3	1.4	41	39	0.9	0.9	496	156	11.2	3.5	269	119	6.1	2.6	1383	251	31.2	5.2	1230	239	27.8	5	455	145	10.3
0500000US21133	21133	Letcher County, Kentucky	9300	271	9300	(X)	6354	331	68.3	2.9	2137	246	23	2.5	4930	342	53	3.5	1591	229	17.1	2.4	313	139	3.4	1.5	79	55	0.8	0.6	1111	183	11.9	1.9	467	121	5	1.3	2946	283	31.7	2.9	2617	267	28.1	2.9	1194	180	12.8
0500000US21135	21135	Lewis County, Kentucky	4983	228	4983	(X)	3638	277	73	4	1303	190	26.1	3.5	2778	296	55.7	5.2	803	162	16.1	3.2	182	95	3.7	1.9	104	72	2.1	1.4	678	161	13.6	3.1	396	131	7.9	2.6	1345	200	27	4	1203	201	24.1	4	539	104	10.8
0500000US21137	21137	Lincoln County, Kentucky	9793	212	9793	(X)	6680	368	68.2	3.4	3078	258	31.4	2.4	5105	372	52.1	3.6	2161	238	22.1	2.3	451	187	4.6	1.9	284	144	2.9	1.5	1124	224	11.5	2.3	633	176	6.5	1.8	3113	331	31.8	3.4	2805	331	28.6	3.4	1267	185	12.9
0500000US21139	21139	Livingston County, Kentucky	3576	190	3576	(X)	2625	187	73.4	3.7	813	147	22.7	3.3	2096	163	58.6	4.3	574	126	16.1	3.1	160	74	4.5	2	51	34	1.4	0.9	369	128	10.3	3.4	188	90	5.3	2.4	951	144	26.6	3.7	861	136	24.1	3.5	444	84	12.4
0500000US21141	21141	Logan County, Kentucky	11044	266	11044	(X)	7846	364	71	3.2	3110	285	28.2	2.4	5696	332	51.6	3.2	1941	216	17.6	2	731	207	6.6	1.8	309	120	2.8	1.1	1419	271	12.8	2.4	860	251	7.8	2.2	3198	378	29	3.2	2843	359	25.7	3.1	1167	189	10.6
0500000US21143	21143	Lyon County, Kentucky	3295	284	3295	(X)	2205	208	66.9	4.8	690	138	20.9	3.3	1819	205	55.2	5.2	537	115	16.3	2.7	42	24	1.3	0.7	4	6	0.1	0.2	344	103	10.4	3.1	149	63	4.5	1.9	1090	206	33.1	4.8	1024	200	31.1	4.8	394	100	12
0500000US21145	21145	McCracken County, Kentucky	27182	491	27182	(X)	18104	511	66.6	1.7	7376	373	27.1	1.3	14057	489	51.7	1.7	4972	347	18.3	1.2	1124	223	4.1	0.8	685	191	2.5	0.7	2923	337	10.8	1.2	1719	271	6.3	1	9078	502	33.4	1.7	8040	442	29.6	1.4	3397	262	12.5
0500000US21147	21147	McCreary County, Kentucky	6333	286	6333	(X)	4637	307	73.2	3.7	1775	241	28	3.4	3553	335	56.1	4.5	1284	245	20.3	3.6	297	126	4.7	2	154	98	2.4	1.5	787	188	12.4	2.9	337	129	5.3	2	1696	251	26.8	3.7	1449	242	22.9	3.6	525	155	8.3
0500000US21149	21149	McLean County, Kentucky	3765	122	3765	(X)	2654	148	70.5	3.5	1182	135	31.4	3.2	2042	154	54.2	4	780	118	20.7	2.9	159	53	4.2	1.4	93	57	2.5	1.5	453	96	12	2.5	309	80	8.2	2.1	1111	143	29.5	3.5	989	131	26.3	3.3	412	83	10.9
0500000US21151	21151	Madison County, Kentucky	31130	733	31130	(X)	20270	542	65.1	1.8	9006	523	28.9	1.6	15033	577	48.3	2.1	5971	468	19.2	1.5	1275	254	4.1	0.8	763	207	2.5	0.6	3962	467	12.7	1.5	2272	358	7.3	1.1	10860	707	34.9	1.8	8335	571	26.8	1.6	2517	306	8.1
0500000US21153	21153	Magoffin County, Kentucky	4795	198	4795	(X)	3437	257	71.7	4.5	1494	175	31.2	3.4	2724	251	56.8	4.7	1093	172	22.8	3.4	176	92	3.7	1.9	109	82	2.3	1.7	537	132	11.2	2.8	292	116	6.1	2.4	1358	227	28.3	4.5	1282	230	26.7	4.6	431	129	9
0500000US21155	21155	Marion County, Kentucky	7206	254	7206	(X)	4753	271	66	3.3	2193	206	30.4	2.3	3690	264	51.2	3.5	1596	187	22.1	2.3	247	74	3.4	1	159	76	2.2	1	816	164	11.3	2.2	438	126	6.1	1.7	2453	262	34	3.3	2127	249	29.5	3.2	935	159	13
0500000US21157	21157	Marshall County, Kentucky	12434	365	12434	(X)	9108	384	73.3	2.3	3272	266	26.3	1.8	7435	362	59.8	2.8	2342	264	18.8	2	511	169	4.1	1.3	207	102	1.7	0.8	1162	255	9.3	2	723	198	5.8	1.5	3326	302	26.7	2.3	3120	288	25.1	2.2	1442	200	11.6
0500000US21159	21159	Martin County, Kentucky	4391	286	4391	(X)	3250	287	74	5.1	1319	232	30	4.8	2305	249	52.5	5.8	673	157	15.3	3.7	326	147	7.4	3.2	262	140	6	3.1	619	203	14.1	4.4	384	168	8.7	3.7	1141	248	26	5.1	954	230	21.7	4.8	398	113	9.1
0500000US21161	21161	Mason County, Kentucky	6568	267	6568	(X)	4819	303	73.4	3.8	2038	235	31	3.1	3587	291	54.6	3.9	1384	195	21.1	2.7	378	112	5.8	1.7	144	72	2.2	1.1	854	173	13	2.6	510	150	7.8	2.2	1749	263	26.6	3.8	1564	255	23.8	3.7	739	143	11.3
0500000US21163	21163	Meade County, Kentucky	10162	256	10162	(X)	7634	371	75.1	2.9	3577	298	35.2	2.7	6033	384	59.4	3.5	2529	239	24.9	2.3	546	158	5.4	1.5	361	155	3.6	1.5	1055	200	10.4	1.9	687	188	6.8	1.8	2528	298	24.9	2.9	2228	282	21.9	2.8	823	141	8.1
0500000US21165	21165	Menifee County, Kentucky	2173	182	2173	(X)	1406	107	64.7	5.5	487	109	22.4	5.7	1154	116	53.1	6.2	420	106	19.3	5.4	93	63	4.3	2.8	23	29	1.1	1.3	159	68	7.3	3.1	44	38	2	1.8	767	168	35.3	5.5	695	158	32	5.4	226	104	10.4
0500000US21167	21167	Mercer County, Kentucky	8330	272	8330	(X)	5819	320	69.9	2.8	2292	227	27.5	2.4	4669	277	56.1	3	1655	198	19.9	2.3	340	130	4.1	1.5	124	73	1.5	0.9	810	163	9.7	1.8	513	144	6.2	1.7	2511	239	30.1	2.8	2263	237	27.2	2.8	940	141	11.3
0500000US21169	21169	Metcalfe County, Kentucky	4019	191	4019	(X)	2814	220	70	4.4	1088	152	27.1	3.4	2171	180	54	3.9	825	127	20.5	2.9	236	106	5.9	2.6	109	77	2.7	1.9	407	114	10.1	2.8	154	58	3.8	1.4	1205	188	30	4.4	1024	168	25.5	4	427	106	10.6
0500000US21171	21171	Monroe County, Kentucky	4358	225	4358	(X)	2870	233	65.9	4.1	1103	171	25.3	3.5	2197	194	50.4	4.1	755	121	17.3	2.8	128	67	2.9	1.6	51	31	1.2	0.7	545	164	12.5	3.5	297	139	6.8	3	1488	190	34.1	4.1	1292	171	29.6	4	667	120	15.3
0500000US21173	21173	Montgomery County, Kentucky	10189	255	10189	(X)	7023	340	68.9	3.2	3266	265	32.1	2.5	5111	337	50.2	3.2	2042	240	20	2.3	634	169	6.2	1.7	395	149	3.9	1.5	1278	232	12.5	2.3	829	190	8.1	1.8	3166	345	31.1	3.2	2702	327	26.5	3.1	798	152	7.8
0500000US21175	21175	Morgan County, Kentucky	4627	269	4627	(X)	3402	258	73.5	3.5	1302	201	28.1	3.5	2634	264	56.9	4.3	935	198	20.2	3.7	218	98	4.7	2.1	133	76	2.9	1.7	550	114	11.9	2.5	234	79	5.1	1.7	1225	177	26.5	3.5	1090	166	23.6	3.4	466	117	10.1
0500000US21177	21177	Muhlenberg County, Kentucky	12117	339	12117	(X)	8923	324	73.6	2.5	3310	271	27.3	2.2	7125	327	58.8	3	2526	249	20.8	2.1	353	108	2.9	0.9	149	81	1.2	0.7	1445	250	11.9	2	635	159	5.2	1.3	3194	341	26.4	2.5	2880	316	23.8	2.4	1299	193	10.7
0500000US21179	21179	Nelson County, Kentucky	16160	373	16160	(X)	11831	435	73.2	2	5512	348	34.1	1.9	9207	459	57	2.6	3777	349	23.4	2.1	800	203	5	1.2	637	193	3.9	1.2	1824	298	11.3	1.8	1098	220	6.8	1.3	4329	332	26.8	2	3667	334	22.7	2	1062	212	6.6
0500000US21181	21181	Nicholas County, Kentucky	2798	136	2798	(X)	2026	165	72.4	4.7	891	127	31.8	4.2	1532	148	54.8	5	638	108	22.8	3.7	117	54	4.2	1.9	47	33	1.7	1.2	377	117	13.5	4	206	94	7.4	3.3	772	136	27.6	4.7	635	119	22.7	4.1	263	69	9.4
0500000US21183	21183	Ohio County, Kentucky	8667	268	8667	(X)	6198	325	71.5	3	2584	232	29.8	2.3	4905	303	56.6	3.1	1805	189	20.8	2	251	94	2.9	1.1	150	68	1.7	0.8	1042	174	12	1.9	629	154	7.3	1.7	2469	275	28.5	3	2226	264	25.7	3	1152	170	13.3
0500000US21185	21185	Oldham County, Kentucky	19400	325	19400	(X)	15732	403	81.1	1.6	8270	357	42.6	1.6	13264	439	68.4	1.8	6575	338	33.9	1.5	811	191	4.2	1	509	142	2.6	0.7	1657	243	8.5	1.3	1186	192	6.1	1	3668	311	18.9	1.6	2969	286	15.3	1.5	1058	157	5.5
0500000US21187	21187	Owen County, Kentucky	4713	192	4713	(X)	3251	261	69	4.4	1448	199	30.7	3.8	2521	260	53.5	4.8	1066	172	22.6	3.4	267	98	5.7	2.1	99	68	2.1	1.4	463	143	9.8	3	283	126	6	2.7	1462	211	31	4.4	1357	196	28.8	4.2	435	105	9.2
0500000US21189	21189	Owsley County, Kentucky	1650	164	1650	(X)	1105	151	67	8.1	385	103	23.3	6.6	866	149	52.5	8.3	227	93	13.8	5.9	37	32	2.2	1.9	21	29	1.3	1.7	202	93	12.2	5.6	137	81	8.3	4.9	545	159	33	8.1	493	150	29.9	7.5	259	102	15.7
0500000US21191	21191	Pendleton County, Kentucky	5339	232	5339	(X)	3726	254	69.8	3.7	1662	199	31.1	3.3	2894	219	54.2	3.6	1253	175	23.5	3.1	158	83	3	1.5	85	58	1.6	1.1	674	143	12.6	2.6	324	100	6.1	1.8	1613	208	30.2	3.7	1206	198	22.6	3.5	534	110	10
0500000US21193	21193	Perry County, Kentucky	10849	311	10849	(X)	7623	417	70.3	3.1	3098	305	28.6	2.5	5385	373	49.6	3.2	1898	277	17.5	2.4	541	163	5	1.5	315	122	2.9	1.1	1697	291	15.6	2.6	885	187	8.2	1.7	3226	341	29.7	3.1	2807	318	25.9	2.9	1171	182	10.8
0500000US21195	21195	Pike County, Kentucky	26904	397	26904	(X)	18748	518	69.7	1.7	7401	463	27.5	1.6	14096	530	52.4	1.8	5492	418	20.4	1.5	1215	252	4.5	0.9	424	150	1.6	0.6	3437	362	12.8	1.3	1485	267	5.5	1	8156	474	30.3	1.7	7413	451	27.6	1.6	2805	292	10.4
0500000US21197	21197	Powell County, Kentucky	4581	178	4581	(X)	3273	256	71.4	5	1529	229	33.4	4.6	2397	263	52.3	5.2	944	216	20.6	4.5	208	96	4.5	2.1	152	90	3.3	2	668	173	14.6	3.8	433	158	9.5	3.4	1308	239	28.6	5	1139	214	24.9	4.6	439	117	9.6
0500000US21199	21199	Pulaski County, Kentucky	26199	505	26199	(X)	17904	622	68.3	2.1	7273	485	27.8	1.6	14058	610	53.7	2.2	5019	408	19.2	1.4	963	210	3.7	0.8	468	148	1.8	0.6	2883	389	11	1.5	1786	334	6.8	1.3	8295	591	31.7	2.1	7231	601	27.6	2.2	3085	268	11.8
0500000US21201	21201	Robertson County, Kentucky	776	103	776	(X)	474	71	61.1	9	248	66	32	9.3	309	75	39.8	9.6	165	60	21.3	8.4	33	35	4.3	4.4	21	32	2.7	4.1	132	64	17	8.4	62	42	8	5.4	302	95	38.9	9	288	90	37.1	8.6	98	44	12.6
0500000US21203	21203	Rockcastle County, Kentucky	6474	253	6474	(X)	4584	291	70.8	3.6	1880	210	29	2.9	3399	291	52.5	4.3	1486	209	23	3	191	79	3	1.2	93	60	1.4	0.9	994	219	15.4	3.2	301	103	4.6	1.6	1890	242	29.2	3.6	1763	244	27.2	3.6	863	150	13.3
0500000US21205	21205	Rowan County, Kentucky	8206	459	8206	(X)	5450	356	66.4	3.3	2353	227	28.7	2.5	3975	350	48.4	3.9	1519	244	18.5	2.9	373	115	4.5	1.4	110	76	1.3	0.9	1102	232	13.4	2.7	724	198	8.8	2.3	2756	346	33.6	3.3	2232	322	27.2	3.4	750	162	9.1
0500000US21207	21207	Russell County, Kentucky	7409	282	7409	(X)	4749	308	64.1	3.8	1715	205	23.1	2.6	3608	290	48.7	3.9	1178	175	15.9	2.4	373	123	5	1.6	70	50	0.9	0.7	768	181	10.4	2.4	467	162	6.3	2.1	2660	318	35.9	3.8	2323	272	31.4	3.4	1095	170	14.8
0500000US21209	21209	Scott County, Kentucky	17628	320	17628	(X)	12611	453	71.5	2.4	6476	402	36.7	2.2	9392	455	53.3	2.6	4506	372	25.6	2.1	1009	286	5.7	1.6	473	206	2.7	1.2	2210	383	12.5	2.2	1497	302	8.5	1.7	5017	444	28.5	2.4	4307	411	24.4	2.2	1291	213	7.3
0500000US21211	21211	Shelby County, Kentucky	15030	363	15030	(X)	11128	424	74	2.2	4819	348	32.1	2.1	8791	409	58.5	2.5	3449	291	22.9	1.9	774	220	5.1	1.4	346	135	2.3	0.9	1563	251	10.4	1.6	1024	220	6.8	1.4	3902	350	26	2.2	3335	340	22.2	2.2	944	187	6.3
0500000US21213	21213	Simpson County, Kentucky	6672	226	6672	(X)	4772	251	71.5	3.1	2053	216	30.8	2.9	3511	292	52.6	4.3	1269	200	19	3	435	174	6.5	2.6	369	160	5.5	2.3	826	204	12.4	3	415	140	6.2	2.1	1900	222	28.5	3.1	1715	223	25.7	3.1	692	130	10.4
0500000US21215	21215	Spencer County, Kentucky	6224	154	6224	(X)	4833	200	77.7	2.8	2118	177	34	2.8	4230	239	68	3.4	1665	172	26.8	2.7	185	89	3	1.4	123	72	2	1.1	418	112	6.7	1.8	330	114	5.3	1.9	1391	180	22.3	2.8	1193	181	19.2	2.8	443	131	7.1
0500000US21217	21217	Taylor County, Kentucky	9633	299	9633	(X)	6501	340	67.5	3.1	2756	271	28.6	2.6	4941	273	51.3	2.6	1883	204	19.5	2	267	91	2.8	0.9	99	57	1	0.6	1293	205	13.4	2.1	774	177	8	1.8	3132	321	32.5	3.1	2741	308	28.5	2.9	1238	206	12.9
0500000US21219	21219	Todd County, Kentucky	4665	162	4665	(X)	3326	198	71.3	3.6	1553	177	33.3	3.4	2505	211	53.7	4.3	1072	169	23	3.5	183	74	3.9	1.6	91	51	2	1.1	638	164	13.7	3.4	390	150	8.4	3.2	1339	178	28.7	3.6	1116	173	23.9	3.5	474	108	10.2
0500000US21221	21221	Trigg County, Kentucky	6149	266	6149	(X)	4409	261	71.7	4	1545	169	25.1	2.6	3561	276	57.9	4.5	1064	183	17.3	2.9	262	119	4.3	2	121	78	2	1.3	586	155	9.5	2.4	360	138	5.9	2.2	1740	280	28.3	4	1569	287	25.5	4.2	550	120	8.9
0500000US21223	21223	Trimble County, Kentucky	3420	125	3420	(X)	2633	133	77	3.6	1067	145	31.2	4	2236	133	65.4	4	886	134	25.9	3.8	122	65	3.6	1.9	51	48	1.5	1.4	275	94	8	2.7	130	68	3.8	1.9	787	137	23	3.6	706	135	20.6	3.6	235	74	6.9
0500000US21225	21225	Union County, Kentucky	5468	271	5468	(X)	3865	274	70.7	3.6	1754	224	32.1	3.3	2729	249	49.9	4	1072	163	19.6	2.7	339	138	6.2	2.5	209	119	3.8	2.1	797	160	14.6	2.9	473	120	8.7	2.1	1603	214	29.3	3.6	1510	210	27.6	3.6	853	152	15.6
0500000US21227	21227	Warren County, Kentucky	42910	601	42910	(X)	27075	635	63.1	1.5	12569	548	29.3	1.2	20013	613	46.6	1.5	8587	457	20	1.1	1608	303	3.7	0.7	681	175	1.6	0.4	5454	449	12.7	1	3301	423	7.7	1	15835	730	36.9	1.5	12467	672	29.1	1.4	3189	280	7.4
0500000US21229	21229	Washington County, Kentucky	4541	167	4541	(X)	3428	200	75.5	3.8	1601	155	35.3	3	2844	205	62.6	4.1	1239	157	27.3	3.1	171	61	3.8	1.3	101	51	2.2	1.1	413	102	9.1	2.3	261	90	5.7	2	1113	182	24.5	3.8	979	172	21.6	3.6	424	108	9.3
0500000US21231	21231	Wayne County, Kentucky	8526	335	8526	(X)	5998	352	70.3	3.4	2551	303	29.9	3.2	4483	350	52.6	3.4	1788	255	21	2.7	326	137	3.8	1.6	152	101	1.8	1.2	1189	218	13.9	2.6	611	190	7.2	2.2	2528	315	29.7	3.4	2306	296	27	3.2	849	167	10
0500000US21233	21233	Webster County, Kentucky	4990	193	4990	(X)	3646	198	73.1	3.1	1258	151	25.2	2.9	2946	203	59	3.6	906	116	18.2	2.3	252	88	5.1	1.8	119	67	2.4	1.3	448	103	9	2	233	79	4.7	1.6	1344	171	26.9	3.1	1207	164	24.2	3	578	120	11.6
0500000US21235	21235	Whitley County, Kentucky	13197	378	13197	(X)	9226	427	69.9	2.7	3933	314	29.8	2.2	6565	434	49.7	3	2586	292	19.6	2.1	889	209	6.7	1.6	484	172	3.7	1.3	1772	262	13.4	1.9	863	203	6.5	1.5	3971	390	30.1	2.7	3417	367	25.9	2.7	1423	172	10.8
0500000US21237	21237	Wolfe County, Kentucky	2543	203	2543	(X)	1780	191	70	5.6	678	127	26.7	4.3	1211	159	47.6	5.8	399	121	15.7	4.5	82	38	3.2	1.5	33	29	1.3	1.1	487	142	19.2	5.2	246	104	9.7	3.9	763	162	30	5.6	678	157	26.7	5.5	233	77	9.2
0500000US21239	21239	Woodford County, Kentucky	9878	260	9878	(X)	6638	284	67.2	2.8	2981	256	30.2	2.4	5246	325	53.1	3.3	2100	266	21.3	2.6	449	126	4.5	1.3	200	93	2	0.9	943	180	9.5	1.8	681	175	6.9	1.7	3240	314	32.8	2.8	2650	274	26.8	2.5	888	138	9
0500000US39001	39001	Adams County, Ohio	10905	307	10905	(X)	7788	307	71.4	2.4	3409	234	31.3	1.9	5864	382	53.8	3.2	2193	221	20.1	1.9	542	143	5	1.3	338	129	3.1	1.2	1382	199	12.7	1.9	878	166	8.1	1.5	3117	294	28.6	2.4	2710	264	24.9	2.2	1328	170	12.2
0500000US39003	39003	Allen County, Ohio	40703	500	40703	(X)	27782	492	68.3	1.1	12193	410	30	0.9	20074	483	49.3	1.2	7346	342	18	0.8	1836	310	4.5	0.8	1091	254	2.7	0.6	5872	443	14.4	1.1	3756	370	9.2	0.9	12921	507	31.7	1.1	11196	475	27.5	1.1	4668	321	11.5
0500000US39005	39005	Ashland County, Ohio	20125	366	20125	(X)	14392	448	71.5	1.7	5502	362	27.3	1.7	11947	473	59.4	2.2	4141	356	20.6	1.7	849	192	4.2	0.9	349	136	1.7	0.7	1596	245	7.9	1.2	1012	211	5	1	5733	350	28.5	1.7	4930	329	24.5	1.6	2103	209	10.4
0500000US39007	39007	Ashtabula County, Ohio	38771	582	38771	(X)	26096	655	67.3	1.4	10957	455	28.3	1	19559	634	50.4	1.4	7087	400	18.3	1	2039	270	5.3	0.7	1244	213	3.2	0.6	4498	369	11.6	0.9	2626	261	6.8	0.7	12675	559	32.7	1.4	10503	548	27.1	1.3	4651	362	12
0500000US39009	39009	Athens County, Ohio	22496	624	22496	(X)	12430	489	55.3	1.7	5323	329	23.7	1.2	9487	526	42.2	2.1	3532	296	15.7	1.2	910	201	4	0.9	487	133	2.2	0.6	2033	320	9	1.4	1304	285	5.8	1.2	10066	509	44.7	1.7	6593	451	29.3	2	1937	209	8.6
0500000US39011	39011	Auglaize County, Ohio	18297	249	18297	(X)	13118	388	71.7	2	5490	300	30	1.5	10999	394	60.1	2.3	4194	259	22.9	1.4	664	139	3.6	0.7	429	123	2.3	0.7	1455	231	8	1.2	867	186	4.7	1	5179	378	28.3	2	4521	335	24.7	1.8	2002	218	10.9
0500000US39013	39013	Belmont County, Ohio	28747	484	28747	(X)	19212	489	66.8	1.5	6924	308	24.1	1	14846	481	51.6	1.7	4621	327	16.1	1.1	1396	273	4.9	0.9	745	212	2.6	0.7	2970	294	10.3	1	1558	222	5.4	0.8	9535	493	33.2	1.5	8434	464	29.3	1.4	3761	260	13.1
0500000US39015	39015	Brown County, Ohio	16112	403	16112	(X)	11844	439	73.5	2.1	4801	326	29.8	1.7	9562	454	59.3	2.4	3548	304	22	1.7	595	147	3.7	0.9	300	91	1.9	0.6	1687	265	10.5	1.6	953	179	5.9	1.1	4268	369	26.5	2.1	3679	374	22.8	2.2	1634	247	10.1
0500000US39017	39017	Butler County, Ohio	135104	862	135104	(X)	94396	1043	69.9	0.7	43183	873	32	0.6	72246	1155	53.5	0.8	30411	935	22.5	0.7	5989	561	4.4	0.4	2996	443	2.2	0.3	16161	935	12	0.7	9776	722	7.2	0.5	40708	1072	30.1	0.7	32996	1087	24.4	0.8	10665	515	7.9
0500000US39019	39019	Carroll County, Ohio	11485	316	11485	(X)	7991	421	69.6	2.9	3121	211	27.2	1.6	6773	398	59	3	2369	220	20.6	1.9	460	118	4	1	260	91	2.3	0.8	758	182	6.6	1.5	492	144	4.3	1.2	3494	337	30.4	2.9	2946	307	25.7	2.6	1240	187	10.8
0500000US39021	39021	Champaign County, Ohio	15278	285	15278	(X)	11073	387	72.5	2.1	5056	305	33.1	1.8	8627	375	56.5	2.4	3504	295	22.9	1.9	760	184	5	1.2	553	165	3.6	1.1	1686	247	11	1.6	999	191	6.5	1.2	4205	329	27.5	2.1	3662	299	24	1.9	1556	198	10.2
0500000US39023	39023	Clark County, Ohio	54771	698	54771	(X)	36046	785	65.8	1.3	15308	542	27.9	0.9	26506	704	48.4	1.3	9625	498	17.6	0.9	2285	279	4.2	0.5	1194	186	2.2	0.3	7255	537	13.2	0.9	4489	440	8.2	0.8	18725	787	34.2	1.3	15695	676	28.7	1.2	6442	428	11.8
0500000US39025	39025	Clermont County, Ohio	73333	687	73333	(X)	53113	795	72.4	1.1	24078	703	32.8	0.9	41748	752	56.9	1	17196	662	23.4	0.9	4048	459	5.5	0.6	2317	373	3.2	0.5	7317	578	10	0.8	4565	459	6.2	0.6	20220	868	27.6	1.1	16444	693	22.4	0.8	6021	409	8.2
0500000US39027	39027	Clinton County, Ohio	16190	296	16190	(X)	11598	405	71.6	2.2	5382	353	33.2	2.1	8713	378	53.8	2.2	3407	281	21	1.8	1136	238	7	1.5	724	206	4.5	1.3	1749	289	10.8	1.7	1251	272	7.7	1.6	4592	380	28.4	2.2	3958	349	24.4	2.1	1891	189	11.7
0500000US39029	39029	Columbiana County, Ohio	42235	535	42235	(X)	29301	660	69.4	1.3	11508	503	27.2	1.1	23219	589	55	1.4	8072	451	19.1	1.1	1759	264	4.2	0.6	951	171	2.3	0.4	4323	445	10.2	1	2485	343	5.9	0.8	12934	598	30.6	1.3	10858	597	25.7	1.4	4606	318	10.9
0500000US39031	39031	Coshocton County, Ohio	14375	264	14375	(X)	9993	362	69.5	2	3922	268	27.3	1.7	7787	359	54.2	2.2	2738	241	19	1.6	597	135	4.2	0.9	309	99	2.1	0.7	1609	279	11.2	1.9	875	160	6.1	1.1	4382	286	30.5	2	3788	279	26.4	2	1692	188	11.8
0500000US39033	39033	Crawford County, Ohio	17905	319	17905	(X)	12435	388	69.4	1.9	5190	265	29	1.4	9611	419	53.7	2.1	3447	294	19.3	1.6	814	157	4.5	0.9	546	135	3	0.8	2010	266	11.2	1.5	1197	234	6.7	1.3	5470	359	30.6	1.9	4717	337	26.3	1.8	2308	242	12.9
0500000US39035	39035	Cuyahoga County, Ohio	537203	2113	537203	(X)	316333	2173	58.9	0.4	139622	1861	26	0.3	208228	2042	38.8	0.4	80190	1578	14.9	0.3	21208	909	3.9	0.2	9236	714	1.7	0.1	86897	1615	16.2	0.3	50196	1340	9.3	0.2	220870	2218	41.1	0.4	193539	2283	36	0.4	66852	1351	12.4
0500000US39037	39037	Darke County, Ohio	20700	314	20700	(X)	14476	350	69.9	1.6	5731	247	27.7	1.1	12045	346	58.2	1.6	4357	221	21	1	671	132	3.2	0.6	352	97	1.7	0.5	1760	196	8.5	0.9	1022	144	4.9	0.7	6224	355	30.1	1.6	5346	315	25.8	1.4	2409	216	11.6
0500000US39039	39039	Defiance County, Ohio	15183	292	15183	(X)	10889	380	71.7	2.2	4462	279	29.4	1.7	8512	339	56.1	2.3	2953	231	19.4	1.5	710	179	4.7	1.2	359	128	2.4	0.8	1667	233	11	1.5	1150	212	7.6	1.4	4294	355	28.3	2.2	3591	314	23.7	2	1309	174	8.6
0500000US39041	39041	Delaware County, Ohio	62618	393	62618	(X)	48660	670	77.7	1	26297	584	42	0.9	41888	704	66.9	1.1	21620	582	34.5	0.9	2105	353	3.4	0.6	1365	281	2.2	0.4	4667	421	7.5	0.7	3312	344	5.3	0.5	13958	673	22.3	1	11395	627	18.2	1	3502	331	5.6
0500000US39043	39043	Erie County, Ohio	31642	597	31642	(X)	21192	505	67	1.5	8521	426	26.9	1.2	16478	508	52.1	1.7	5800	378	18.3	1.1	1364	259	4.3	0.8	671	174	2.1	0.5	3350	328	10.6	1	2050	258	6.5	0.8	10450	578	33	1.5	9054	528	28.6	1.4	3556	312	11.2
0500000US39045	39045	Fairfield County, Ohio	54388	571	54388	(X)	39977	749	73.5	1.1	18981	605	34.9	1	31813	737	58.5	1.3	13952	516	25.7	0.9	2307	360	4.2	0.7	1280	256	2.4	0.5	5857	480	10.8	0.9	3749	441	6.9	0.8	14411	619	26.5	1.1	11769	569	21.6	1	4318	308	7.9
0500000US39047	39047	Fayette County, Ohio	11543	248	11543	(X)	7744	255	67.1	2	3277	210	28.4	1.8	5625	274	48.7	2.3	1948	209	16.9	1.8	645	131	5.6	1.1	427	112	3.7	1	1474	215	12.8	1.8	902	166	7.8	1.4	3799	261	32.9	2	3144	228	27.2	1.8	1146	171	9.9
0500000US39049	39049	Franklin County, Ohio	460497	2345	460497	(X)	270205	2326	58.7	0.4	133623	1973	29	0.4	186773	2255	40.6	0.5	83360	1730	18.1	0.4	19072	1068	4.1	0.2	9691	813	2.1	0.2	64360	1563	14	0.3	40572	1435	8.8	0.3	190292	2263	41.3	0.4	149816	2250	32.5	0.4	36342	1115	7.9
0500000US39051	39051	Fulton County, Ohio	16332	246	16332	(X)	12342	290	75.6	1.7	5296	238	32.4	1.5	10140	305	62.1	2	3935	248	24.1	1.6	799	174	4.9	1.1	479	144	2.9	0.9	1403	194	8.6	1.2	882	184	5.4	1.1	3990	296	24.4	1.7	3566	281	21.8	1.6	1640	166	10
0500000US39053	39053	Gallia County, Ohio	12009	381	12009	(X)	8295	343	69.1	2.8	3384	295	28.2	2.2	6533	301	54.4	2.7	2514	271	20.9	2.1	508	140	4.2	1.2	255	112	2.1	0.9	1254	239	10.4	1.9	615	151	5.1	1.2	3714	391	30.9	2.8	3279	371	27.3	2.7	1552	220	12.9
0500000US39055	39055	Geauga County, Ohio	34447	366	34447	(X)	25717	563	74.7	1.6	11401	442	33.1	1.2	21960	636	63.8	1.8	9458	443	27.5	1.2	1069	254	3.1	0.7	508	193	1.5	0.6	2688	301	7.8	0.9	1435	225	4.2	0.7	8730	569	25.3	1.6	7508	493	21.8	1.4	3015	275	8.8
0500000US39057	39057	Greene County, Ohio	62558	681	62558	(X)	42676	802	68.2	1.2	17927	594	28.7	0.9	33777	754	54	1.2	12673	501	20.3	0.8	2135	343	3.4	0.6	1065	216	1.7	0.3	6764	449	10.8	0.7	4189	403	6.7	0.6	19882	839	31.8	1.2	16308	818	26.1	1.2	5160	382	8.2
0500000US39059	39059	Guernsey County, Ohio	15913	308	15913	(X)	10556	390	66.3	2.3	4215	269	26.5	1.6	8088	396	50.8	2.4	2785	229	17.5	1.4	703	172	4.4	1.1	381	144	2.4	0.9	1765	200	11.1	1.2	1049	159	6.6	1	5357	386	33.7	2.3	4710	352	29.6	2.1	2137	227	13.4
0500000US39061	39061	Hamilton County, Ohio	325766	1878	325766	(X)	194818	1721	59.8	0.5	89225	1382	27.4	0.4	134062	1799	41.2	0.5	53221	1285	16.3	0.4	12388	770	3.8	0.2	6299	675	1.9	0.2	48368	1277	14.8	0.4	29705	840	9.1	0.3	130948	1754	40.2	0.5	111804	1762	34.3	0.5	34907	1061	10.7
0500000US39063	39063	Hancock County, Ohio	30425	460	30425	(X)	20404	583	67.1	1.8	8900	434	29.3	1.3	15707	526	51.6	1.8	5912	382	19.4	1.2	1525	297	5	1	1130	269	3.7	0.9	3172	382	10.4	1.2	1858	257	6.1	0.8	10021	596	32.9	1.8	8526	539	28	1.7	2980	326	9.8
0500000US39065	39065	Hardin County, Ohio	11692	295	11692	(X)	7604	287	65	2.2	3455	240	29.6	1.9	5808	294	49.7	2.5	2330	216	19.9	1.8	555	145	4.7	1.2	277	102	2.4	0.9	1241	217	10.6	1.8	848	180	7.3	1.5	4088	293	35	2.2	3444	264	29.5	2	1261	168	10.8
0500000US39067	39067	Harrison County, Ohio	6298	248	6298	(X)	4164	233	66.1	2.7	1836	163	29.2	2.1	3497	214	55.5	3	1399	149	22.2	2.2	231	79	3.7	1.2	127	63	2	1	436	111	6.9	1.7	310	101	4.9	1.5	2134	190	33.9	2.7	1843	169	29.3	2.4	832	100	13.2
0500000US39069	39069	Henry County, Ohio	11110	348	11110	(X)	7786	314	70.1	2.1	3493	194	31.4	1.5	6375	316	57.4	2.4	2572	173	23.2	1.4	402	112	3.6	1	256	81	2.3	0.7	1009	168	9.1	1.5	665	135	6	1.2	3324	265	29.9	2.1	2696	220	24.3	1.7	1232	144	11.1
0500000US39071	39071	Highland County, Ohio	16841	311	16841	(X)	11995	420	71.2	2.1	5193	350	30.8	1.9	9191	376	54.6	2	3560	275	21.1	1.5	802	185	4.8	1.1	456	136	2.7	0.8	2002	277	11.9	1.6	1177	227	7	1.3	4846	361	28.8	2.1	4204	328	25	1.9	2026	214	12
0500000US39073	39073	Hocking County, Ohio	11491	295	11491	(X)	8175	326	71.1	2.1	3502	221	30.5	1.8	6394	304	55.6	2.3	2449	213	21.3	1.8	548	137	4.8	1.2	213	92	1.9	0.8	1233	197	10.7	1.7	840	164	7.3	1.4	3316	252	28.9	2.1	2919	247	25.4	2.1	1244	159	10.8
0500000US39075	39075	Holmes County, Ohio	12261	279	12261	(X)	9708	332	79.2	2.6	4860	331	39.6	2.6	8761	347	71.5	2.8	4477	313	36.5	2.5	292	114	2.4	0.9	85	53	0.7	0.4	655	165	5.3	1.3	298	102	2.4	0.8	2553	343	20.8	2.6	2238	315	18.3	2.4	888	157	7.2
0500000US39077	39077	Huron County, Ohio	22684	396	22684	(X)	16212	399	71.5	1.6	7374	336	32.5	1.3	12753	430	56.2	2	4951	282	21.8	1.2	883	160	3.9	0.7	635	132	2.8	0.6	2576	288	11.4	1.2	1788	242	7.9	1	6472	401	28.5	1.6	5193	382	22.9	1.5	2353	241	10.4
0500000US39079	39079	Jackson County, Ohio	13252	297	13252	(X)	9136	330	68.9	2.2	4113	267	31	1.8	6594	318	49.8	2.4	2591	263	19.6	2	769	228	5.8	1.7	466	210	3.5	1.6	1773	245	13.4	1.8	1056	217	8	1.6	4116	321	31.1	2.2	3549	312	26.8	2.2	1481	200	11.2
0500000US39081	39081	Jefferson County, Ohio	28741	442	28741	(X)	18825	456	65.5	1.4	6987	309	24.3	1	14151	422	49.2	1.5	4577	284	15.9	1	1304	261	4.5	0.9	423	136	1.5	0.5	3370	332	11.7	1.1	1987	260	6.9	0.9	9916	469	34.5	1.4	8623	430	30	1.4	3982	290	13.9
0500000US39083	39083	Knox County, Ohio	22495	516	22495	(X)	15615	478	69.4	1.8	6836	378	30.4	1.5	12799	500	56.9	2.1	5068	397	22.5	1.7	830	215	3.7	0.9	570	174	2.5	0.8	1986	288	8.8	1.3	1198	241	5.3	1.1	6880	458	30.6	1.8	5850	432	26	1.7	2524	240	11.2
0500000US39085	39085	Lake County, Ohio	94347	662	94347	(X)	62015	847	65.7	0.8	26273	694	27.8	0.7	48185	815	51.1	0.8	18880	583	20	0.6	3457	371	3.7	0.4	1787	269	1.9	0.3	10373	563	11	0.6	5606	514	5.9	0.5	32332	862	34.3	0.8	27297	890	28.9	0.9	10111	545	10.7
0500000US39087	39087	Lawrence County, Ohio	24479	404	24479	(X)	17157	482	70.1	1.7	6803	398	27.8	1.5	12311	496	50.3	2.1	4215	292	17.2	1.2	1486	282	6.1	1.1	800	202	3.3	0.8	3360	385	13.7	1.5	1788	277	7.3	1.1	7322	438	29.9	1.7	6354	369	26	1.4	3005	295	12.3
0500000US39089	39089	Licking County, Ohio	63314	584	63314	(X)	44819	836	70.8	1.2	19900	593	31.4	0.9	35005	713	55.3	1.1	13767	507	21.7	0.8	3147	426	5	0.7	2090	337	3.3	0.5	6667	399	10.5	0.6	4043	351	6.4	0.5	18495	803	29.2	1.2	15357	745	24.3	1.1	5917	420	9.3
0500000US39091	39091	Logan County, Ohio	18095	364	18095	(X)	12510	334	69.1	1.7	5343	322	29.5	1.6	9560	400	52.8	2.4	3445	319	19	1.8	888	179	4.9	1	471	160	2.6	0.9	2062	233	11.4	1.2	1427	221	7.9	1.2	5585	353	30.9	1.7	4627	334	25.6	1.6	1917	206	10.6
0500000US39093	39093	Lorain County, Ohio	115534	936	115534	(X)	80715	1031	69.9	0.8	34972	820	30.3	0.6	60002	1095	51.9	0.9	22980	688	19.9	0.6	5073	452	4.4	0.4	2526	329	2.2	0.3	15640	633	13.5	0.5	9466	472	8.2	0.4	34819	1036	30.1	0.8	29505	840	25.5	0.7	11144	478	9.6
0500000US39095	39095	Lucas County, Ohio	178777	1140	178777	(X)	110536	1329	61.8	0.7	50556	1071	28.3	0.6	72834	1124	40.7	0.6	28321	795	15.8	0.4	8499	679	4.8	0.4	4344	451	2.4	0.3	29203	904	16.3	0.5	17891	765	10	0.4	68241	1466	38.2	0.7	57228	1458	32	0.8	18636	797	10.4
0500000US39097	39097	Madison County, Ohio	14791	380	14791	(X)	10486	401	70.9	2.5	4517	318	30.5	2	8415	400	56.9	2.6	3366	280	22.8	1.8	646	182	4.4	1.2	377	158	2.5	1.1	1425	196	9.6	1.3	774	165	5.2	1.1	4305	414	29.1	2.5	3661	360	24.8	2.3	1407	192	9.5
0500000US39099	39099	Mahoning County, Ohio	98749	823	98749	(X)	62832	955	63.6	0.8	25182	837	25.5	0.8	44064	852	44.6	0.9	15380	571	15.6	0.6	4111	338	4.2	0.3	1815	284	1.8	0.3	14657	713	14.8	0.7	7987	571	8.1	0.6	35917	899	36.4	0.8	31475	864	31.9	0.8	13709	600	13.9
0500000US39101	39101	Marion County, Ohio	24851	494	24851	(X)	17039	407	68.6	1.6	7122	312	28.7	1.1	12437	421	50	1.9	4119	329	16.6	1.3	1427	242	5.7	1	815	202	3.3	0.8	3175	260	12.8	1	2188	249	8.8	0.9	7812	496	31.4	1.6	6679	474	26.9	1.6	3070	270	12.4
0500000US39103	39103	Medina County, Ohio	64813	471	64813	(X)	48171	677	74.3	0.9	22053	625	34	0.9	40096	700	61.9	1	17396	576	26.8	0.9	2457	335	3.8	0.5	1359	238	2.1	0.4	5618	446	8.7	0.7	3298	362	5.1	0.6	16642	623	25.7	0.9	13656	608	21.1	0.9	5199	372	8
0500000US39105	39105	Meigs County, Ohio	9644	226	9644	(X)	6343	274	65.8	2.8	2296	187	23.8	1.9	4907	257	50.9	2.8	1621	179	16.8	1.8	408	124	4.2	1.3	136	64	1.4	0.7	1028	186	10.7	1.9	539	121	5.6	1.2	3301	301	34.2	2.8	2806	286	29.1	2.7	1090	158	11.3
0500000US39107	39107	Mercer County, Ohio	15689	277	15689	(X)	11457	331	73	2	4808	238	30.6	1.4	9724	298	62	2	3840	223	24.5	1.5	623	159	4	1	322	113	2.1	0.7	1110	225	7.1	1.4	646	146	4.1	0.9	4232	330	27	2	3757	330	23.9	2	1773	210	11.3
0500000US39109	39109	Miami County, Ohio	41364	448	41364	(X)	28646	632	69.3	1.5	12158	453	29.4	1	22395	564	54.1	1.5	8244	435	19.9	1	1788	328	4.3	0.8	1126	253	2.7	0.6	4463	458	10.8	1.1	2788	338	6.7	0.8	12718	690	30.7	1.5	10625	649	25.7	1.5	4174	340	10.1
0500000US39111	39111	Monroe County, Ohio	6167	202	6167	(X)	4096	230	66.4	3	1588	137	25.7	2	3252	220	52.7	3.3	1093	142	17.7	2.2	225	88	3.6	1.4	124	72	2	1.2	619	121	10	1.9	371	98	6	1.6	2071	200	33.6	3	1923	195	31.2	3	814	128	13.2
0500000US39113	39113	Montgomery County, Ohio	223546	1402	223546	(X)	137690	1612	61.6	0.6	60234	1537	26.9	0.6	95601	1395	42.8	0.6	35056	1099	15.7	0.5	9885	719	4.4	0.3	5707	559	2.6	0.2	32204	992	14.4	0.4	19471	873	8.7	0.4	85856	1522	38.4	0.6	73714	1433	33	0.6	25615	820	11.5
0500000US39115	39115	Morgan County, Ohio	6252	229	6252	(X)	4493	241	71.9	2.7	1808	183	28.9	2.4	3474	256	55.6	3.5	1218	190	19.5	2.8	313	122	5	1.9	179	95	2.9	1.5	706	130	11.3	2.1	411	103	6.6	1.6	1759	179	28.1	2.7	1505	162	24.1	2.5	682	133	10.9
0500000US39117	39117	Morrow County, Ohio	13084	277	13084	(X)	9661	428	73.8	3	4196	324	32.1	2.4	7777	419	59.4	3.1	3134	339	24	2.6	691	176	5.3	1.4	363	128	2.8	1	1193	241	9.1	1.8	699	182	5.3	1.4	3423	407	26.2	3	2806	366	21.4	2.7	1198	175	9.2
0500000US39119	39119	Muskingum County, Ohio	34262	476	34262	(X)	22981	551	67.1	1.5	10028	411	29.3	1.1	17041	487	49.7	1.4	6318	297	18.4	0.8	1424	206	4.2	0.6	845	184	2.5	0.5	4516	400	13.2	1.1	2865	324	8.4	0.9	11281	555	32.9	1.5	9354	517	27.3	1.4	3968	289	11.6
0500000US39121	39121	Noble County, Ohio	4771	282	4771	(X)	3480	233	72.9	3.5	813	155	17	3	2850	227	59.7	3.9	516	146	10.8	3	156	81	3.3	1.6	46	39	1	0.8	474	122	9.9	2.6	251	95	5.3	2	1291	202	27.1	3.5	1208	196	25.3	3.5	749	133	15.7
0500000US39123	39123	Ottawa County, Ohio	18009	384	18009	(X)	12439	433	69.1	2.3	4292	328	23.8	1.8	10103	389	56.1	2.2	3186	234	17.7	1.3	763	184	4.2	1	328	124	1.8	0.7	1573	244	8.7	1.3	778	191	4.3	1	5570	453	30.9	2.3	4793	456	26.6	2.3	2085	216	11.6
0500000US39125	39125	Paulding County, Ohio	7571	187	7571	(X)	5389	215	71.2	2.3	2260	182	29.9	2.1	4367	203	57.7	2.5	1682	161	22.2	2	374	102	4.9	1.3	217	80	2.9	1	648	137	8.6	1.8	361	115	4.8	1.5	2182	188	28.8	2.3	1846	181	24.4	2.3	955	116	12.6
0500000US39127	39127	Perry County, Ohio	13762	309	13762	(X)	9758	362	70.9	2.3	4395	312	31.9	2.1	7679	399	55.8	2.8	3074	284	22.3	2	617	151	4.5	1.1	401	131	2.9	1	1462	201	10.6	1.4	920	175	6.7	1.2	4004	338	29.1	2.3	3215	306	23.4	2.1	1252	176	9.1
0500000US39129	39129	Pickaway County, Ohio	19284	437	19284	(X)	14268	404	74	1.8	6609	352	34.3	1.5	11272	411	58.5	2	4712	318	24.4	1.5	747	163	3.9	0.9	475	145	2.5	0.8	2249	272	11.7	1.4	1422	242	7.4	1.2	5016	399	26	1.8	4165	353	21.6	1.7	2071	229	10.7
0500000US39131	39131	Pike County, Ohio	10816	289	10816	(X)	7686	290	71.1	2.6	3168	260	29.3	2.3	5532	300	51.1	2.7	2003	273	18.5	2.5	554	169	5.1	1.6	352	145	3.3	1.3	1600	229	14.8	2.1	813	170	7.5	1.6	3130	319	28.9	2.6	2754	330	25.5	2.8	1185	161	11
0500000US39133	39133	Portage County, Ohio	61746	582	61746	(X)	40974	761	66.4	1.1	17359	625	28.1	1	31584	748	51.2	1.2	11854	543	19.2	0.9	2483	336	4	0.5	1285	238	2.1	0.4	6907	571	11.2	0.9	4220	466	6.8	0.7	20772	755	33.6	1.1	16216	672	26.3	1.1	4794	336	7.8
0500000US39135	39135	Preble County, Ohio	16321	323	16321	(X)	11732	334	71.9	2	4788	232	29.3	1.4	9370	364	57.4	2.2	3627	230	22.2	1.3	669	148	4.1	0.9	352	100	2.2	0.6	1693	217	10.4	1.3	809	170	5	1	4589	365	28.1	2	3889	340	23.8	1.9	1622	184	9.9
0500000US39137	39137	Putnam County, Ohio	12936	206	12936	(X)	9688	293	74.9	2.2	4209	210	32.5	1.6	8227	310	63.6	2.3	3454	203	26.7	1.5	448	103	3.5	0.8	173	55	1.3	0.4	1013	159	7.8	1.2	582	131	4.5	1	3248	292	25.1	2.2	2775	306	21.5	2.3	1324	166	10.2
0500000US39139	39139	Richland County, Ohio	48593	551	48593	(X)	32597	671	67.1	1.2	13453	509	27.7	1	24909	616	51.3	1.1	8669	465	17.8	0.9	1854	313	3.8	0.6	1067	266	2.2	0.5	5834	465	12	1	3717	333	7.6	0.7	15996	642	32.9	1.2	14057	668	28.9	1.3	5748	418	11.8
0500000US39141	39141	Ross County, Ohio	28158	513	28158	(X)	19338	544	68.7	1.6	8376	429	29.7	1.3	14778	488	52.5	1.6	5629	422	20	1.5	1252	224	4.4	0.8	731	167	2.6	0.6	3308	368	11.7	1.3	2016	279	7.2	1	8820	490	31.3	1.6	7334	485	26	1.6	3047	312	10.8
0500000US39143	39143	Sandusky County, Ohio	24031	393	24031	(X)	16778	520	69.8	1.8	7072	357	29.4	1.3	13099	540	54.5	2	4960	344	20.6	1.3	1015	217	4.2	0.9	582	149	2.4	0.6	2664	285	11.1	1.2	1530	225	6.4	0.9	7253	446	30.2	1.8	6105	420	25.4	1.7	2820	219	11.7
0500000US39145	39145	Scioto County, Ohio	29788	515	29788	(X)	19679	490	66.1	1.5	7818	461	26.2	1.5	14813	463	49.7	1.6	5217	328	17.5	1.1	1338	260	4.5	0.9	758	217	2.5	0.7	3528	407	11.8	1.3	1843	299	6.2	1	10109	528	33.9	1.5	8841	507	29.7	1.5	3798	311	12.8
0500000US39147	39147	Seneca County, Ohio	22026	394	22026	(X)	15018	434	68.2	1.9	6300	323	28.6	1.4	11581	444	52.6	1.9	4265	313	19.4	1.4	1128	202	5.1	0.9	652	150	3	0.7	2309	244	10.5	1.1	1383	211	6.3	1	7008	458	31.8	1.9	5722	433	26	1.8	2503	264	11.4
0500000US39149	39149	Shelby County, Ohio	18507	299	18507	(X)	13396	281	72.4	1.8	6240	221	33.7	1.2	10578	308	57.2	2	4401	267	23.8	1.5	1162	204	6.3	1.1	751	168	4.1	0.9	1656	199	8.9	1	1088	187	5.9	1	5111	379	27.6	1.8	4320	356	23.3	1.7	1657	177	9
0500000US39151	39151	Stark County, Ohio	150072	1130	150072	(X)	99732	1103	66.5	0.7	41638	867	27.7	0.6	74352	1084	49.5	0.7	26836	782	17.9	0.5	6427	573	4.3	0.4	3487	431	2.3	0.3	18953	783	12.6	0.5	11315	640	7.5	0.4	50340	1174	33.5	0.7	43781	1048	29.2	0.6	17623	650	11.7
0500000US39153	39153	Summit County, Ohio	221498	1385	221498	(X)	141044	1549	63.7	0.6	60036	1260	27.1	0.5	103433	1492	46.7	0.6	39862	1018	18	0.5	8311	631	3.8	0.3	3457	380	1.6	0.2	29300	878	13.2	0.4	16717	749	7.5	0.3	80454	1406	36.3	0.6	68118	1321	30.8	0.6	23641	758	10.7
0500000US39155	39155	Trumbull County, Ohio	86746	626	86746	(X)	56042	814	64.6	1	21361	570	24.6	0.6	40555	813	46.8	1	13283	479	15.3	0.6	3976	404	4.6	0.5	1589	214	1.8	0.2	11511	598	13.3	0.7	6489	439	7.5	0.5	30704	912	35.4	1	26597	873	30.7	0.9	10611	527	12.2
0500000US39157	39157	Tuscarawas County, Ohio	36262	453	36262	(X)	24944	509	68.8	1.4	10342	402	28.5	1	20315	585	56	1.7	7578	410	20.9	1.1	1363	246	3.8	0.7	702	188	1.9	0.5	3266	318	9	0.9	2062	301	5.7	0.8	11318	560	31.2	1.4	9668	514	26.7	1.3	4369	332	12
0500000US39159	39159	Union County, Ohio	17795	420	17795	(X)	13414	452	75.4	2	7078	339	39.8	1.8	11197	460	62.9	2.2	5629	358	31.6	1.9	701	180	3.9	1	429	137	2.4	0.8	1516	243	8.5	1.4	1020	229	5.7	1.3	4381	379	24.6	2	3492	350	19.6	1.8	1138	181	6.4
0500000US39161	39161	Van Wert County, Ohio	11381	227	11381	(X)	7936	226	69.7	2.1	3230	179	28.4	1.5	6784	273	59.6	2.6	2630	184	23.1	1.6	323	119	2.8	1	183	72	1.6	0.6	829	138	7.3	1.2	417	107	3.7	0.9	3445	271	30.3	2.1	2963	264	26	2.1	1283	160	11.3
0500000US39163	39163	Vinton County, Ohio	5305	199	5305	(X)	3811	226	71.8	3.4	1638	222	30.9	3.8	2831	251	53.4	4.3	1060	212	20	3.7	208	95	3.9	1.8	142	87	2.7	1.6	772	173	14.6	3.2	436	115	8.2	2.1	1494	188	28.2	3.4	1347	185	25.4	3.4	597	135	11.3
0500000US39165	39165	Warren County, Ohio	75283	635	75283	(X)	57728	757	76.7	0.9	28971	575	38.5	0.7	48183	877	64	1.2	22792	623	30.3	0.8	2476	338	3.3	0.4	1417	298	1.9	0.4	7069	563	9.4	0.7	4762	484	6.3	0.6	17555	734	23.3	0.9	14262	669	18.9	0.8	5066	413	6.7
0500000US39167	39167	Washington County, Ohio	25184	416	25184	(X)	16856	483	66.9	1.8	6715	349	26.7	1.2	13701	470	54.4	1.8	4800	334	19.1	1.3	786	198	3.1	0.8	483	147	1.9	0.6	2369	297	9.4	1.2	1432	233	5.7	0.9	8328	486	33.1	1.8	7135	463	28.3	1.7	2774	258	11
0500000US39169	39169	Wayne County, Ohio	42485	426	42485	(X)	30380	567	71.5	1.3	12755	404	30	0.9	24978	585	58.8	1.4	9696	380	22.8	0.9	1612	263	3.8	0.6	751	204	1.8	0.5	3790	382	8.9	0.9	2308	311	5.4	0.7	12105	598	28.5	1.3	10289	612	24.2	1.4	4306	362	10.1
0500000US39171	39171	Williams County, Ohio	15139	324	15139	(X)	10590	349	70	1.9	4313	288	28.5	1.7	8611	359	56.9	2.2	3089	274	20.4	1.7	539	136	3.6	0.9	375	127	2.5	0.8	1440	195	9.5	1.2	849	155	5.6	1	4549	302	30	1.9	3890	300	25.7	1.9	1561	209	10.3
0500000US39173	39173	Wood County, Ohio	48680	589	48680	(X)	30934	545	63.5	1.2	13189	404	27.1	0.8	25068	645	51.5	1.3	9612	396	19.7	0.8	1674	193	3.4	0.4	1007	150	2.1	0.3	4192	473	8.6	1	2570	351	5.3	0.7	17746	683	36.5	1.2	13201	606	27.1	1.1	4295	299	8.8
0500000US39175	39175	Wyandot County, Ohio	9179	149	9179	(X)	6321	269	68.9	2.5	2759	214	30.1	2.2	5207	250	56.7	2.4	2111	185	23	1.9	367	108	4	1.2	164	71	1.8	0.8	747	161	8.1	1.7	484	136	5.3	1.5	2858	231	31.1	2.5	2370	226	25.8	2.5	1056	140	11.5
0500000US42001	42001	Adams County, Pennsylvania	38431	447	38431	(X)	27661	519	72	1.2	11374	391	29.6	0.9	22483	510	58.5	1.2	8377	362	21.8	0.9	1682	214	4.4	0.6	870	172	2.3	0.4	3496	322	9.1	0.8	2127	253	5.5	0.7	10770	510	28	1.2	9082	427	23.6	1.1	3842	305	10
0500000US42003	42003	Allegheny County, Pennsylvania	523175	2283	523175	(X)	306918	2143	58.7	0.4	124595	1521	23.8	0.3	225755	2256	43.2	0.4	83595	1444	16	0.3	18439	850	3.5	0.2	8093	565	1.5	0.1	62724	1308	12	0.3	32907	1028	6.3	0.2	216257	2202	41.3	0.4	183282	1995	35	0.3	69059	1451	13.2
0500000US42005	42005	Armstrong County, Pennsylvania	28807	340	28807	(X)	20009	452	69.5	1.4	7697	267	26.7	0.9	15768	419	54.7	1.4	5291	226	18.4	0.8	1600	214	5.6	0.7	855	175	3	0.6	2641	224	9.2	0.8	1551	172	5.4	0.6	8798	441	30.5	1.4	7846	457	27.2	1.5	3823	232	13.3
0500000US42007	42007	Beaver County, Pennsylvania	70198	626	70198	(X)	47605	700	67.8	0.9	17864	570	25.4	0.7	36160	766	51.5	1	12290	485	17.5	0.6	2915	301	4.2	0.4	1216	224	1.7	0.3	8530	500	12.2	0.7	4358	345	6.2	0.5	22593	717	32.2	0.9	19770	710	28.2	0.9	8921	406	12.7
0500000US42009	42009	Bedford County, Pennsylvania	20001	271	20001	(X)	14094	333	70.5	1.5	5226	235	26.1	1.1	11441	307	57.2	1.5	3835	213	19.2	1.1	821	136	4.1	0.7	474	111	2.4	0.6	1832	190	9.2	0.9	917	165	4.6	0.8	5907	318	29.5	1.5	5313	316	26.6	1.5	2451	172	12.3
0500000US42011	42011	Berks County, Pennsylvania	153780	934	153780	(X)	107040	1124	69.6	0.7	47647	892	31	0.5	81297	1119	52.9	0.7	31606	785	20.6	0.5	7403	608	4.8	0.4	4106	453	2.7	0.3	18340	810	11.9	0.5	11935	717	7.8	0.5	46740	1100	30.4	0.7	37776	1016	24.6	0.6	15137	730	9.8
0500000US42013	42013	Blair County, Pennsylvania	51771	591	51771	(X)	34282	663	66.2	1.2	13805	495	26.7	0.9	25686	603	49.6	1.1	9073	401	17.5	0.8	2455	304	4.7	0.6	1286	198	2.5	0.4	6141	431	11.9	0.8	3446	372	6.7	0.7	17489	676	33.8	1.2	14941	573	28.9	1	6883	413	13.3
0500000US42015	42015	Bradford County, Pennsylvania	24630	334	24630	(X)	16847	392	68.4	1.2	6513	271	26.4	0.9	13158	341	53.4	1.2	4448	201	18.1	0.8	1090	115	4.4	0.5	575	93	2.3	0.4	2599	252	10.6	1	1490	207	6	0.8	7783	307	31.6	1.2	6657	288	27	1.2	3041	205	12.3
0500000US42017	42017	Bucks County, Pennsylvania	229955	1078	229955	(X)	165703	1440	72.1	0.6	71229	1339	31	0.5	136178	1642	59.2	0.7	57270	1156	24.9	0.5	8561	481	3.7	0.2	3639	386	1.6	0.2	20964	936	9.1	0.4	10320	654	4.5	0.3	64252	1399	27.9	0.6	54004	1233	23.5	0.5	21880	809	9.5
0500000US42019	42019	Butler County, Pennsylvania	72458	570	72458	(X)	50110	691	69.2	0.9	21770	526	30	0.7	41693	647	57.5	0.9	16720	484	23.1	0.7	2133	240	2.9	0.3	1162	202	1.6	0.3	6284	407	8.7	0.6	3888	336	5.4	0.5	22348	663	30.8	0.9	18659	609	25.8	0.8	7516	350	10.4
0500000US42021	42021	Cambria County, Pennsylvania	58428	663	58428	(X)	38220	659	65.4	1	14318	463	24.5	0.8	29399	580	50.3	0.9	9754	367	16.7	0.6	2484	275	4.3	0.5	1021	183	1.7	0.3	6337	390	10.8	0.7	3543	295	6.1	0.5	20208	672	34.6	1	17938	630	30.7	1	8615	426	14.7
0500000US42023	42023	Cameron County, Pennsylvania	2133	100	2133	(X)	1296	82	60.8	3.3	463	61	21.7	2.6	1060	80	49.7	3.6	339	54	15.9	2.4	80	34	3.8	1.6	34	21	1.6	1	156	41	7.3	1.8	90	31	4.2	1.4	837	86	39.2	3.3	719	87	33.7	3.5	380	59	17.8
0500000US42025	42025	Carbon County, Pennsylvania	26136	401	26136	(X)	18213	471	69.7	1.5	6676	354	25.5	1.2	14376	542	55	1.9	4841	357	18.5	1.3	1077	180	4.1	0.7	375	111	1.4	0.4	2760	304	10.6	1.2	1460	221	5.6	0.8	7923	402	30.3	1.5	6372	381	24.4	1.4	2889	263	11.1
0500000US42027	42027	Centre County, Pennsylvania	56134	723	56134	(X)	31839	641	56.7	1	12886	497	23	0.8	26862	652	47.9	1.2	10105	450	18	0.8	1748	268	3.1	0.5	947	215	1.7	0.4	3229	315	5.8	0.6	1834	226	3.3	0.4	24295	671	43.3	1	15771	709	28.1	1.3	4609	384	8.2
0500000US42029	42029	Chester County, Pennsylvania	182732	941	182732	(X)	129189	1102	70.7	0.6	62263	940	34.1	0.5	108503	1183	59.4	0.6	51696	982	28.3	0.5	6184	548	3.4	0.3	3058	358	1.7	0.2	14502	682	7.9	0.4	7509	565	4.1	0.3	53543	1160	29.3	0.6	43175	1121	23.6	0.6	15779	657	8.6
0500000US42031	42031	Clarion County, Pennsylvania	15827	306	15827	(X)	10294	239	65	1.6	4181	205	26.4	1.2	8247	228	52.1	1.4	2983	184	18.8	1.1	740	144	4.7	0.9	397	112	2.5	0.7	1307	142	8.3	0.9	801	125	5.1	0.8	5533	310	35	1.6	4429	277	28	1.5	1886	132	11.9
0500000US42033	42033	Clearfield County, Pennsylvania	32715	421	32715	(X)	22106	482	67.6	1.4	8408	336	25.7	1	17365	486	53.1	1.4	5787	324	17.7	1	1442	236	4.4	0.7	687	163	2.1	0.5	3299	319	10.1	1	1934	274	5.9	0.8	10609	485	32.4	1.4	9414	487	28.8	1.4	4384	286	13.4
0500000US42035	42035	Clinton County, Pennsylvania	15282	271	15282	(X)	9758	259	63.9	1.5	3843	220	25.1	1.4	7472	276	48.9	1.6	2506	196	16.4	1.2	696	149	4.6	1	383	103	2.5	0.7	1590	188	10.4	1.2	954	137	6.2	0.9	5524	274	36.1	1.5	4494	252	29.4	1.6	2042	155	13.4
0500000US42037	42037	Columbia County, Pennsylvania	25906	458	25906	(X)	16751	441	64.7	1.6	6588	283	25.4	1.2	13095	489	50.5	1.8	4536	269	17.5	1.1	1090	187	4.2	0.7	515	130	2	0.5	2566	275	9.9	1.1	1537	212	5.9	0.8	9155	498	35.3	1.6	6923	412	26.7	1.5	3163	259	12.2
0500000US42039	42039	Crawford County, Pennsylvania	35368	506	35368	(X)	23598	560	66.7	1.3	9168	360	25.9	0.9	18557	510	52.5	1.2	6250	296	17.7	0.8	1566	187	4.4	0.5	891	160	2.5	0.4	3475	366	9.8	1	2027	289	5.7	0.8	11770	481	33.3	1.3	10122	473	28.6	1.3	4238	288	12
0500000US42041	42041	Cumberland County, Pennsylvania	94412	668	94412	(X)	61457	765	65.1	0.8	25494	640	27	0.6	50503	822	53.5	0.9	19352	566	20.5	0.6	3344	432	3.5	0.5	1745	319	1.8	0.3	7610	482	8.1	0.5	4397	390	4.7	0.4	32955	855	34.9	0.8	26912	853	28.5	0.9	10292	513	10.9
0500000US42043	42043	Dauphin County, Pennsylvania	108047	900	108047	(X)	67287	1066	62.3	1	29351	838	27.2	0.7	48466	867	44.9	0.8	18141	630	16.8	0.6	4328	460	4	0.4	2397	362	2.2	0.3	14493	685	13.4	0.6	8813	591	8.2	0.5	40760	1157	37.7	1	34361	974	31.8	0.8	11163	599	10.3
0500000US42045	42045	Delaware County, Pennsylvania	206596	1001	206596	(X)	138133	1287	66.9	0.6	63035	1074	30.5	0.5	99626	1342	48.2	0.6	43451	952	21	0.5	9671	600	4.7	0.3	4099	431	2	0.2	28836	835	14	0.4	15485	714	7.5	0.3	68463	1293	33.1	0.6	58423	1194	28.3	0.5	23212	695	11.2
0500000US42047	42047	Elk County, Pennsylvania	13557	319	13557	(X)	8931	324	65.9	2.3	3401	231	25.1	1.6	6754	289	49.8	2.2	2142	167	15.8	1.2	776	144	5.7	1.1	429	122	3.2	0.9	1401	192	10.3	1.3	830	156	6.1	1.1	4626	359	34.1	2.3	4149	341	30.6	2.2	1845	218	13.6
0500000US42049	42049	Erie County, Pennsylvania	108303	779	108303	(X)	69518	954	64.2	0.8	29954	719	27.7	0.6	51135	859	47.2	0.8	18929	575	17.5	0.5	4622	432	4.3	0.4	2464	309	2.3	0.3	13761	646	12.7	0.6	8561	524	7.9	0.5	38785	1005	35.8	0.8	32600	887	30.1	0.8	12066	523	11.1
0500000US42051	42051	Fayette County, Pennsylvania	54717	726	54717	(X)	36780	754	67.2	1.1	13997	468	25.6	0.8	26865	689	49.1	1.2	8742	510	16	0.9	2659	387	4.9	0.7	1101	182	2	0.3	7256	468	13.3	0.8	4154	348	7.6	0.6	17937	662	32.8	1.1	15733	667	28.8	1.1	7710	459	14.1
0500000US42053	42053	Forest County, Pennsylvania	1990	167	1990	(X)	1247	126	62.7	4.2	236	71	11.9	3	1056	108	53.1	4.4	165	53	8.3	2.3	50	31	2.5	1.5	21	18	1.1	0.9	141	43	7.1	2.1	50	25	2.5	1.2	743	111	37.3	4.2	658	93	33.1	3.8	366	57	18.4
0500000US42055	42055	Franklin County, Pennsylvania	58032	578	58032	(X)	39863	764	68.7	1.2	16743	646	28.9	1	31995	803	55.1	1.4	11970	540	20.6	0.9	2446	335	4.2	0.6	1511	284	2.6	0.5	5422	481	9.3	0.8	3262	396	5.6	0.7	18169	741	31.3	1.2	15385	612	26.5	1	6641	429	11.4
0500000US42057	42057	Fulton County, Pennsylvania	5929	126	5929	(X)	4110	137	69.3	2.3	1578	82	26.6	1.3	3376	124	56.9	2.3	1161	78	19.6	1.4	244	51	4.1	0.8	153	46	2.6	0.8	490	80	8.3	1.3	264	58	4.5	1	1819	149	30.7	2.3	1447	122	24.4	1.8	691	69	11.7
0500000US42059	42059	Greene County, Pennsylvania	14102	565	14102	(X)	9774	512	69.3	2	3916	270	27.8	1.4	7607	453	53.9	2.4	2818	258	20	1.6	646	148	4.6	1	263	88	1.9	0.6	1521	251	10.8	1.7	835	193	5.9	1.3	4328	319	30.7	2	3658	286	25.9	1.9	1879	176	13.3
0500000US42061	42061	Huntingdon County, Pennsylvania	16791	331	16791	(X)	11445	313	68.2	1.4	4181	220	24.9	1.1	9351	249	55.7	1.3	2971	179	17.7	1	664	119	4	0.7	364	102	2.2	0.6	1430	163	8.5	0.9	846	148	5	0.9	5346	269	31.8	1.4	4707	251	28	1.4	2082	166	12.4
0500000US42063	42063	Indiana County, Pennsylvania	34558	583	34558	(X)	22223	428	64.3	1.2	8173	330	23.7	1	18071	445	52.3	1.2	6017	307	17.4	0.9	1209	196	3.5	0.6	547	126	1.6	0.4	2943	325	8.5	0.9	1609	249	4.7	0.7	12335	556	35.7	1.2	9234	410	26.7	1.1	3639	298	10.5
0500000US42065	42065	Jefferson County, Pennsylvania	18389	210	18389	(X)	12218	238	66.4	1.3	4653	216	25.3	1.2	9746	239	53	1.4	3238	206	17.6	1.1	779	105	4.2	0.6	373	85	2	0.5	1693	156	9.2	0.8	1042	122	5.7	0.6	6171	265	33.6	1.3	5351	248	29.1	1.2	2575	156	14
0500000US42067	42067	Juniata County, Pennsylvania	9103	173	9103	(X)	6858	195	75.3	1.7	2732	181	30	1.8	5773	181	63.4	1.8	2100	159	23.1	1.6	395	92	4.3	1	209	75	2.3	0.8	690	116	7.6	1.2	423	98	4.6	1.1	2245	159	24.7	1.7	1937	161	21.3	1.7	936	108	10.3
0500000US42069	42069	Lackawanna County, Pennsylvania	86491	851	86491	(X)	55757	830	64.5	0.8	23019	643	26.6	0.7	40712	769	47.1	0.8	15684	550	18.1	0.6	4363	350	5	0.4	1758	263	2	0.3	10682	622	12.4	0.7	5577	435	6.4	0.5	30734	822	35.5	0.8	26089	762	30.2	0.8	12151	525	14
0500000US42071	42071	Lancaster County, Pennsylvania	192681	786	192681	(X)	136095	1220	70.6	0.6	59060	903	30.7	0.5	111700	1270	58	0.6	45061	896	23.4	0.5	7170	541	3.7	0.3	3452	345	1.8	0.2	17225	892	8.9	0.5	10547	726	5.5	0.4	56586	1146	29.4	0.6	46353	1077	24.1	0.6	19298	707	10
0500000US42073	42073	Lawrence County, Pennsylvania	36613	421	36613	(X)	25141	471	68.7	1.2	10009	386	27.3	1	18919	501	51.7	1.3	6833	370	18.7	1	1569	186	4.3	0.5	735	149	2	0.4	4653	360	12.7	1	2441	260	6.7	0.7	11472	492	31.3	1.2	10383	442	28.4	1.1	5120	308	14
0500000US42075	42075	Lebanon County, Pennsylvania	51899	527	51899	(X)	36344	690	70	1.2	15131	479	29.2	0.9	28925	597	55.7	1.1	10650	372	20.5	0.7	2393	303	4.6	0.6	1190	217	2.3	0.4	5026	367	9.7	0.7	3291	367	6.3	0.7	15555	660	30	1.2	12865	539	24.8	1	5708	353	11
0500000US42077	42077	Lehigh County, Pennsylvania	133159	853	133159	(X)	90426	1044	67.9	0.7	41722	856	31.3	0.6	67561	955	50.7	0.7	28313	850	21.3	0.6	5963	671	4.5	0.5	3060	460	2.3	0.3	16902	762	12.7	0.6	10349	582	7.8	0.4	42733	1065	32.1	0.7	35751	929	26.8	0.6	14455	582	10.9
0500000US42079	42079	Luzerne County, Pennsylvania	131052	1069	131052	(X)	83630	1172	63.8	0.8	33101	731	25.3	0.5	60795	1035	46.4	0.8	21554	610	16.4	0.4	6269	561	4.8	0.4	2646	373	2	0.3	16566	701	12.6	0.5	8901	522	6.8	0.4	47422	1076	36.2	0.8	41469	1185	31.6	0.8	18751	757	14.3
0500000US42081	42081	Lycoming County, Pennsylvania	46604	467	46604	(X)	30709	557	65.9	1.3	12242	494	26.3	1.1	23561	513	50.6	1.2	7867	322	16.9	0.7	2105	310	4.5	0.7	1109	267	2.4	0.6	5043	412	10.8	0.9	3266	355	7	0.8	15895	691	34.1	1.3	12800	671	27.5	1.3	5451	429	11.7
0500000US42083	42083	McKean County, Pennsylvania	17180	364	17180	(X)	11252	361	65.5	1.7	4540	250	26.4	1.3	8298	341	48.3	1.7	2793	205	16.3	1.1	892	138	5.2	0.8	477	120	2.8	0.7	2062	213	12	1.3	1270	188	7.4	1.1	5928	336	34.5	1.7	5190	339	30.2	1.8	2309	220	13.4
0500000US42085	42085	Mercer County, Pennsylvania	46418	678	46418	(X)	30905	567	66.6	1.1	11840	477	25.5	0.9	24149	538	52	1.2	8268	390	17.8	0.8	1595	222	3.4	0.5	732	146	1.6	0.3	5161	318	11.1	0.6	2840	303	6.1	0.6	15513	612	33.4	1.1	13759	575	29.6	1.1	6126	331	13.2
0500000US42087	42087	Mifflin County, Pennsylvania	18987	332	18987	(X)	12803	412	67.4	1.8	5148	256	27.1	1.2	10094	430	53.2	2.1	3724	267	19.6	1.4	799	194	4.2	1	406	121	2.1	0.6	1910	270	10.1	1.4	1018	167	5.4	0.9	6184	349	32.6	1.8	5317	351	28	1.8	2608	249	13.7
0500000US42089	42089	Monroe County, Pennsylvania	59941	945	59941	(X)	44737	1088	74.6	1.3	20864	897	34.8	1.4	34207	1055	57.1	1.5	14710	820	24.5	1.3	2627	434	4.4	0.7	1567	351	2.6	0.6	7903	767	13.2	1.3	4587	586	7.7	1	15204	823	25.4	1.3	11938	742	19.9	1.2	4519	446	7.5
0500000US42091	42091	Montgomery County, Pennsylvania	307598	1198	307598	(X)	209017	1533	68	0.4	94803	1235	30.8	0.4	169554	1658	55.1	0.5	74657	1230	24.3	0.4	10730	730	3.5	0.2	5087	489	1.7	0.2	28733	1023	9.3	0.3	15059	865	4.9	0.3	98581	1455	32	0.4	82726	1421	26.9	0.5	32617	899	10.6
0500000US42093	42093	Montour County, Pennsylvania	7200	209	7200	(X)	4943	231	68.7	3	1880	150	26.1	2	3990	220	55.4	2.9	1408	156	19.6	2.1	274	71	3.8	1	163	67	2.3	0.9	679	120	9.4	1.7	309	82	4.3	1.1	2257	240	31.3	3	2022	232	28.1	2.9	924	148	12.8
0500000US42095	42095	Northampton County, Pennsylvania	112111	809	112111	(X)	77576	1009	69.2	0.8	32577	685	29.1	0.5	60969	989	54.4	0.8	23635	628	21.1	0.5	4470	409	4	0.4	2165	336	1.9	0.3	12137	650	10.8	0.6	6777	462	6	0.4	34535	885	30.8	0.8	28462	803	25.4	0.7	12638	591	11.3
0500000US42097	42097	Northumberland County, Pennsylvania	39293	688	39293	(X)	26059	660	66.3	1.3	9746	394	24.8	0.8	20102	670	51.2	1.6	6549	386	16.7	0.9	1779	229	4.5	0.6	795	155	2	0.4	4178	364	10.6	0.9	2402	268	6.1	0.7	13234	583	33.7	1.3	11232	545	28.6	1.3	5564	343	14.2
0500000US42099	42099	Perry County, Pennsylvania	18098	187	18098	(X)	13063	316	72.2	1.6	5332	238	29.5	1.3	10582	365	58.5	2	3903	238	21.6	1.3	744	136	4.1	0.7	401	89	2.2	0.5	1737	213	9.6	1.2	1028	161	5.7	0.9	5035	298	27.8	1.6	3803	266	21	1.4	1402	132	7.7
0500000US42101	42101	Philadelphia County, Pennsylvania	578125	2638	578125	(X)	312755	3198	54.1	0.5	139861	2432	24.2	0.4	162669	2547	28.1	0.4	63295	1826	10.9	0.3	31348	1160	5.4	0.2	13292	916	2.3	0.2	118738	1934	20.5	0.3	63274	1635	10.9	0.3	265370	3114	45.9	0.5	224603	3127	38.9	0.5	66848	1435	11.6
0500000US42103	42103	Pike County, Pennsylvania	22207	541	22207	(X)	16207	527	73	1.9	7107	414	32	1.7	12654	598	57	2.6	5120	350	23.1	1.5	1029	268	4.6	1.2	610	197	2.7	0.9	2524	360	11.4	1.6	1377	277	6.2	1.2	6000	475	27	1.9	5115	415	23	1.8	1621	241	7.3
0500000US42105	42105	Potter County, Pennsylvania	7196	177	7196	(X)	4985	159	69.3	1.6	1734	109	24.1	1.3	3919	152	54.5	1.7	1208	94	16.8	1.2	378	72	5.3	1	136	38	1.9	0.5	688	87	9.6	1.2	390	73	5.4	1	2211	131	30.7	1.6	1904	118	26.5	1.5	850	83	11.8
0500000US42107	42107	Schuylkill County, Pennsylvania	60029	566	60029	(X)	39754	627	66.2	1	15560	388	25.9	0.6	29739	653	49.5	1.1	10457	402	17.4	0.6	3345	369	5.6	0.6	1581	269	2.6	0.4	6670	431	11.1	0.7	3522	312	5.9	0.5	20275	687	33.8	1	17472	633	29.1	0.9	8603	423	14.3
0500000US42109	42109	Snyder County, Pennsylvania	14320	298	14320	(X)	10171	279	71	1.8	4104	221	28.7	1.5	8597	291	60	1.9	3227	197	22.5	1.3	565	107	3.9	0.8	365	91	2.5	0.6	1009	149	7	1	512	117	3.6	0.8	4149	294	29	1.8	3434	269	24	1.7	1606	189	11.2
0500000US42111	42111	Somerset County, Pennsylvania	30168	481	30168	(X)	20452	436	67.8	1.4	7299	321	24.2	1	16924	462	56.1	1.5	5641	299	18.7	0.9	1150	178	3.8	0.6	511	125	1.7	0.4	2378	220	7.9	0.7	1147	167	3.8	0.6	9716	481	32.2	1.4	8538	416	28.3	1.2	4323	296	14.3
0500000US42113	42113	Sullivan County, Pennsylvania	2438	105	2438	(X)	1592	110	65.3	3	462	77	18.9	3	1358	92	55.7	3	337	57	13.8	2.3	117	41	4.8	1.7	62	34	2.5	1.4	117	41	4.8	1.6	63	30	2.6	1.2	846	74	34.7	3	749	71	30.7	2.8	365	55	15
0500000US42115	42115	Susquehanna County, Pennsylvania	17273	272	17273	(X)	12147	273	70.3	1.3	4474	193	25.9	1	9530	247	55.2	1.4	3056	177	17.7	1	960	126	5.6	0.7	513	88	3	0.5	1657	153	9.6	0.9	905	104	5.2	0.6	5126	247	29.7	1.3	4307	232	24.9	1.2	1887	125	10.9
0500000US42117	42117	Tioga County, Pennsylvania	17187	340	17187	(X)	12032	312	70	1.4	4560	211	26.5	1.1	9474	312	55.1	1.6	2977	201	17.3	1.1	750	107	4.4	0.6	458	89	2.7	0.5	1808	184	10.5	1	1125	154	6.5	0.9	5155	279	30	1.4	4176	251	24.3	1.4	1935	167	11.3
0500000US42119	42119	Union County, Pennsylvania	15310	477	15310	(X)	10488	481	68.5	2.2	4421	316	28.9	1.7	8627	406	56.3	2.2	3270	262	21.4	1.5	606	126	4	0.8	410	112	2.7	0.7	1255	270	8.2	1.7	741	216	4.8	1.4	4822	355	31.5	2.2	3943	344	25.8	2.3	1599	178	10.4
0500000US42121	42121	Venango County, Pennsylvania	22482	358	22482	(X)	15119	400	67.2	1.5	5815	283	25.9	1.2	11733	367	52.2	1.5	3866	261	17.2	1.1	984	167	4.4	0.7	480	127	2.1	0.6	2402	267	10.7	1.2	1469	202	6.5	0.9	7363	358	32.8	1.5	6314	326	28.1	1.4	2787	199	12.4
0500000US42123	42123	Warren County, Pennsylvania	17602	258	17602	(X)	11665	265	66.3	1.5	4074	203	23.1	1.2	9541	279	54.2	1.6	2946	201	16.7	1.2	705	125	4	0.7	343	85	1.9	0.5	1419	157	8.1	0.9	785	127	4.5	0.7	5937	311	33.7	1.5	5139	309	29.2	1.6	2188	192	12.4
0500000US42125	42125	Washington County, Pennsylvania	83806	687	83806	(X)	56085	768	66.9	0.9	21893	517	26.1	0.6	44395	694	53	0.9	16273	442	19.4	0.5	2953	311	3.5	0.4	1299	201	1.6	0.2	8737	567	10.4	0.7	4321	377	5.2	0.4	27721	820	33.1	0.9	23697	743	28.3	0.8	11094	427	13.2
0500000US42127	42127	Wayne County, Pennsylvania	19305	435	19305	(X)	13452	376	69.7	1.6	4818	290	25	1.4	11079	368	57.4	1.8	3493	262	18.1	1.3	728	113	3.8	0.6	395	89	2	0.5	1645	176	8.5	0.9	930	133	4.8	0.7	5853	355	30.3	1.6	5114	330	26.5	1.5	2237	214	11.6
0500000US42129	42129	Westmoreland County, Pennsylvania	152819	952	152819	(X)	102425	989	67	0.6	38126	792	24.9	0.5	80697	1043	52.8	0.7	27175	765	17.8	0.5	5862	548	3.8	0.4	2694	340	1.8	0.2	15866	763	10.4	0.5	8257	549	5.4	0.3	50394	993	33	0.6	43779	921	28.6	0.6	20073	679	13.1
0500000US42131	42131	Wyoming County, Pennsylvania	11013	185	11013	(X)	7652	212	69.5	1.7	2921	135	26.5	1.2	5819	216	52.8	2	1899	140	17.2	1.3	650	106	5.9	1	351	78	3.2	0.7	1183	138	10.7	1.2	671	104	6.1	0.9	3361	205	30.5	1.7	2718	186	24.7	1.6	1179	104	10.7
0500000US42133	42133	York County, Pennsylvania	167568	902	167568	(X)	118084	1098	70.5	0.6	50908	931	30.4	0.5	92923	1061	55.5	0.6	35529	886	21.2	0.5	7306	535	4.4	0.3	4538	367	2.7	0.2	17855	848	10.7	0.5	10841	684	6.5	0.4	49484	1114	29.5	0.6	40474	1171	24.2	0.7	16276	752	9.7
0500000US51001	51001	Accomack County, Virginia	13757	506	13757	(X)	8766	475	63.7	3	2891	317	21	2	6299	371	45.8	2.7	1651	225	12	1.6	574	177	4.2	1.3	249	115	1.8	0.8	1893	248	13.8	1.7	991	224	7.2	1.5	4991	486	36.3	3	4440	475	32.3	3.1	2003	269	14.6
0500000US51003	51003	Albemarle County, Virginia	37398	579	37398	(X)	24008	640	64.2	1.7	10481	460	28	1.2	19526	533	52.2	1.4	7956	382	21.3	1	1061	267	2.8	0.7	476	170	1.3	0.5	3421	400	9.1	1.1	2049	340	5.5	0.9	13390	723	35.8	1.7	11183	669	29.9	1.7	3682	319	9.8
0500000US51005	51005	Alleghany County, Virginia	6935	220	6935	(X)	4770	249	68.8	2.7	1745	198	25.2	2.6	3804	209	54.9	3	1306	142	18.8	2	390	134	5.6	1.9	166	106	2.4	1.5	576	135	8.3	1.9	273	92	3.9	1.3	2165	197	31.2	2.7	1907	199	27.5	2.8	1064	145	15.3
0500000US51007	51007	Amelia County, Virginia	5001	190	5001	(X)	3618	269	72.3	4.9	1618	191	32.4	3.6	2753	238	55	4.8	1028	166	20.6	3.3	247	117	4.9	2.3	171	101	3.4	2	618	181	12.4	3.6	419	151	8.4	3	1383	256	27.7	4.9	1124	217	22.5	4.2	414	149	8.3
0500000US51009	51009	Amherst County, Virginia	12693	285	12693	(X)	8771	332	69.1	2.3	3315	290	26.1	2.1	6440	425	50.7	3.3	2219	271	17.5	2	481	150	3.8	1.2	144	72	1.1	0.6	1850	244	14.6	1.9	952	199	7.5	1.5	3922	311	30.9	2.3	3282	295	25.9	2.2	1304	169	10.3
0500000US51011	51011	Appomattox County, Virginia	5857	187	5857	(X)	4321	272	73.8	4.1	1847	203	31.5	3.3	3083	273	52.6	4.5	1127	167	19.2	2.8	363	107	6.2	1.8	183	78	3.1	1.3	875	180	14.9	3	537	153	9.2	2.6	1536	245	26.2	4.1	1352	236	23.1	3.9	626	154	10.7
0500000US51013	51013	Arlington County, Virginia	92436	1020	92436	(X)	41561	1039	45	1.1	17718	581	19.2	0.6	32798	1042	35.5	1.1	13706	656	14.8	0.7	2809	458	3	0.5	769	238	0.8	0.3	5954	498	6.4	0.5	3243	415	3.5	0.4	50875	1179	55	1.1	37619	1100	40.7	1	6301	442	6.8
0500000US51015	51015	Augusta County, Virginia	28021	552	28021	(X)	20399	738	72.8	2	7938	500	28.3	1.6	16858	748	60.2	2.2	5917	476	21.1	1.6	1060	250	3.8	0.9	555	161	2	0.6	2481	330	8.9	1.2	1466	301	5.2	1.1	7622	569	27.2	2	6826	551	24.4	2	3186	353	11.4
0500000US51017	51017	Bath County, Virginia	1926	206	1926	(X)	1449	156	75.2	8.3	472	136	24.5	8.4	1174	178	61	8.7	324	112	16.8	6.4	97	90	5	4.7	52	69	2.7	3.6	178	117	9.2	6.2	96	90	5	4.9	477	191	24.8	8.3	440	180	22.8	7.7	179	88	9.3
0500000US51019	51019	Bedford County, Virginia	26979	422	26979	(X)	20234	558	75	1.7	7921	412	29.4	1.5	16990	557	63	1.8	5873	363	21.8	1.3	1074	229	4	0.8	596	190	2.2	0.7	2170	327	8	1.2	1452	278	5.4	1	6745	473	25	1.7	5696	428	21.1	1.6	2201	281	8.2
0500000US51021	51021	Bland County, Virginia	2663	237	2663	(X)	1971	165	74	5.4	650	134	24.4	5.2	1614	178	60.6	5.8	507	108	19	4.2	60	46	2.3	1.7	29	34	1.1	1.3	297	111	11.2	4.2	114	90	4.3	3.4	692	183	26	5.4	586	160	22	4.9	245	94	9.2
0500000US51023	51023	Botetourt County, Virginia	12789	294	12789	(X)	9748	354	76.2	2.5	3497	258	27.3	1.9	8356	383	65.3	2.8	2926	252	22.9	1.9	302	135	2.4	1.1	162	83	1.3	0.6	1090	239	8.5	1.9	409	131	3.2	1	3041	336	23.8	2.5	2613	314	20.4	2.3	1112	199	8.7
0500000US51025	51025	Brunswick County, Virginia	6126	550	6126	(X)	4126	445	67.4	4.2	1282	232	20.9	2.9	2712	306	44.3	4.2	641	155	10.5	2.1	336	208	5.5	3.1	67	68	1.1	1.1	1078	190	17.6	3.2	574	154	9.4	2.5	2000	318	32.6	4.2	1840	297	30	4.1	765	129	12.5
0500000US51027	51027	Buchanan County, Virginia	9135	341	9135	(X)	6424	395	70.3	3.1	2294	319	25.1	3.1	4907	374	53.7	3.4	1497	251	16.4	2.5	497	163	5.4	1.8	180	113	2	1.2	1020	220	11.2	2.4	617	163	6.8	1.8	2711	284	29.7	3.1	2352	276	25.7	3	931	158	10.2
0500000US51029	51029	Buckingham County, Virginia	5699	605	5699	(X)	3882	499	68.1	5.2	1455	428	25.5	5.7	2664	378	46.7	5.2	834	275	14.6	4.1	197	163	3.5	2.6	153	142	2.7	2.3	1021	230	17.9	4.2	468	186	8.2	3.2	1817	361	31.9	5.2	1543	326	27.1	5	758	201	13.3
0500000US51031	51031	Campbell County, Virginia	21610	422	21610	(X)	14939	437	69.1	1.7	6144	359	28.4	1.6	11163	553	51.7	2.3	3910	363	18.1	1.6	810	208	3.7	1	457	168	2.1	0.8	2966	334	13.7	1.6	1777	296	8.2	1.4	6671	415	30.9	1.7	5614	377	26	1.6	1989	319	9.2
0500000US51033	51033	Caroline County, Virginia	10476	264	10476	(X)	7679	329	73.3	2.4	3292	264	31.4	2.3	5610	352	53.6	3.1	2248	269	21.5	2.5	587	186	5.6	1.8	230	128	2.2	1.2	1482	259	14.1	2.4	814	207	7.8	2	2797	255	26.7	2.4	2321	266	22.2	2.5	903	167	8.6
0500000US51035	51035	Carroll County, Virginia	12556	491	12556	(X)	8755	479	69.7	3.1	3133	357	25	2.5	7068	470	56.3	3.2	2207	338	17.6	2.4	726	239	5.8	1.9	451	197	3.6	1.6	961	209	7.7	1.7	475	141	3.8	1.1	3801	435	30.3	3.1	3589	436	28.6	3.1	1677	229	13.4
0500000US51036	51036	Charles City County, Virginia	2747	111	2747	(X)	1881	123	68.5	3.3	491	82	17.9	2.7	1314	125	47.8	3.9	347	75	12.6	2.6	155	48	5.6	1.8	67	37	2.4	1.3	412	77	15	2.7	77	32	2.8	1.1	866	95	31.5	3.3	771	92	28.1	3.2	337	65	12.3
0500000US51037	51037	Charlotte County, Virginia	4534	287	4534	(X)	3346	237	73.8	3	1249	159	27.5	3.3	2495	221	55	3.8	815	149	18	3.2	234	87	5.2	1.9	113	59	2.5	1.3	617	130	13.6	2.7	321	88	7.1	1.9	1188	162	26.2	3	1133	155	25	3	724	137	16
0500000US51041	51041	Chesterfield County, Virginia	112895	739	112895	(X)	83933	1030	74.3	0.8	41096	734	36.4	0.6	65042	1008	57.6	0.8	30420	675	26.9	0.5	4475	485	4	0.4	2266	353	2	0.3	14416	587	12.8	0.5	8410	473	7.4	0.4	28962	919	25.7	0.8	24029	952	21.3	0.8	7234	451	6.4
0500000US51043	51043	Clarke County, Virginia	5564	169	5564	(X)	3988	247	71.7	3.8	1526	184	27.4	3.2	3367	233	60.5	3.7	1212	179	21.8	3.2	202	83	3.6	1.5	98	62	1.8	1.1	419	124	7.5	2.2	216	102	3.9	1.8	1576	219	28.3	3.8	1157	198	20.8	3.5	327	121	5.9
0500000US51045	51045	Craig County, Virginia	1976	181	1976	(X)	1468	132	74.3	7.3	587	119	29.7	6.5	1197	137	60.6	7.2	482	102	24.4	5.6	61	68	3.1	3.4	46	64	2.3	3.2	210	100	10.6	5.1	59	51	3	2.6	508	177	25.7	7.3	388	150	19.6	6.6	174	92	8.8
0500000US51047	51047	Culpeper County, Virginia	15750	373	15750	(X)	11809	397	75	2.1	5559	421	35.3	2.4	9555	486	60.7	2.9	4231	442	26.9	2.7	638	190	4.1	1.2	427	166	2.7	1	1616	297	10.3	1.9	901	253	5.7	1.6	3941	366	25	2.1	3270	349	20.8	2.1	1338	233	8.5
0500000US51049	51049	Cumberland County, Virginia	3976	204	3976	(X)	2884	280	72.5	5.4	1036	210	26.1	4.6	2088	303	52.5	6.9	694	179	17.5	4.2	182	131	4.6	3.3	116	115	2.9	2.9	614	183	15.4	4.5	226	107	5.7	2.6	1092	213	27.5	5.4	907	218	22.8	5.5	394	118	9.9
0500000US51051	51051	Dickenson County, Virginia	6183	258	6183	(X)	4191	299	67.8	4.2	1277	172	20.7	2.5	3107	273	50.3	4	806	133	13	2.1	235	86	3.8	1.4	68	47	1.1	0.8	849	168	13.7	2.7	403	121	6.5	1.9	1992	278	32.2	4.2	1732	253	28	3.9	619	154	10
0500000US51053	51053	Dinwiddie County, Virginia	9598	246	9598	(X)	7052	306	73.5	2.9	2756	242	28.7	2.4	4884	309	50.9	3.1	1646	213	17.1	2.2	407	115	4.2	1.2	164	78	1.7	0.8	1761	199	18.3	2	946	171	9.9	1.8	2546	296	26.5	2.9	2113	266	22	2.6	753	144	7.8
0500000US51057	51057	Essex County, Virginia	4420	232	4420	(X)	2899	195	65.6	3.4	1137	171	25.7	3.4	2057	175	46.5	3.8	673	124	15.2	2.6	266	87	6	2	138	78	3.1	1.8	576	133	13	2.8	326	112	7.4	2.4	1521	181	34.4	3.4	1269	190	28.7	3.8	507	111	11.5
0500000US51059	51059	Fairfax County, Virginia	385570	1449	385570	(X)	272012	2259	70.5	0.5	133280	1799	34.6	0.4	224150	2526	58.1	0.6	109464	1884	28.4	0.5	14433	1054	3.7	0.3	5481	665	1.4	0.2	33429	1329	8.7	0.3	18335	1047	4.8	0.3	113558	2047	29.5	0.5	90166	1982	23.4	0.5	23088	742	6
0500000US51061	51061	Fauquier County, Virginia	22888	404	22888	(X)	17139	479	74.9	1.9	7350	406	32.1	1.7	14143	453	61.8	2	5709	412	24.9	1.8	1005	242	4.4	1	585	198	2.6	0.9	1991	289	8.7	1.2	1056	219	4.6	1	5749	457	25.1	1.9	4677	439	20.4	1.8	1644	235	7.2
0500000US51063	51063	Floyd County, Virginia	6148	282	6148	(X)	4111	276	66.9	4.1	1562	176	25.4	2.9	3484	269	56.7	4.2	1232	160	20	2.6	131	79	2.1	1.3	55	45	0.9	0.7	496	159	8.1	2.5	275	128	4.5	2.1	2037	287	33.1	4.1	1786	266	29.1	3.8	689	135	11.2
0500000US51065	51065	Fluvanna County, Virginia	9315	335	9315	(X)	6844	349	73.5	3.4	2402	230	25.8	2.3	5665	324	60.8	3.5	1904	215	20.4	2.3	258	105	2.8	1.1	79	56	0.8	0.6	921	189	9.9	1.9	419	112	4.5	1.2	2471	355	26.5	3.4	2184	330	23.4	3.1	737	150	7.9
0500000US51067	51067	Franklin County, Virginia	23581	512	23581	(X)	17304	457	73.4	1.8	6748	424	28.6	1.8	13655	535	57.9	2.2	4609	407	19.5	1.7	942	244	4	1	399	171	1.7	0.7	2707	294	11.5	1.3	1740	267	7.4	1.1	6277	498	26.6	1.8	5158	445	21.9	1.7	2165	276	9.2
0500000US51069	51069	Frederick County, Virginia	28655	435	28655	(X)	21246	538	74.1	1.6	9878	447	34.5	1.4	16980	617	59.3	2.2	7326	429	25.6	1.5	1344	232	4.7	0.8	807	222	2.8	0.8	2922	381	10.2	1.3	1745	315	6.1	1.1	7409	497	25.9	1.6	5518	437	19.3	1.5	1974	249	6.9
0500000US51071	51071	Giles County, Virginia	7054	208	7054	(X)	4890	245	69.3	3.2	1853	215	26.3	2.8	3717	272	52.7	3.9	1355	206	19.2	2.8	285	114	4	1.6	91	58	1.3	0.8	888	208	12.6	2.9	407	135	5.8	1.9	2164	245	30.7	3.2	1850	235	26.2	3.1	746	149	10.6
0500000US51073	51073	Gloucester County, Virginia	13892	363	13892	(X)	10511	473	75.7	2.6	4246	323	30.6	2	8404	424	60.5	2.7	3100	284	22.3	1.9	780	197	5.6	1.4	483	169	3.5	1.2	1327	255	9.6	1.8	663	193	4.8	1.4	3381	362	24.3	2.6	2791	325	20.1	2.3	1367	227	9.8
0500000US51075	51075	Goochland County, Virginia	7822	251	7822	(X)	6274	261	80.2	2.5	2147	220	27.4	2.4	5553	268	71	2.9	1854	204	23.7	2.3	201	76	2.6	1	47	40	0.6	0.5	520	148	6.6	1.9	246	103	3.1	1.3	1548	211	19.8	2.5	1321	200	16.9	2.4	593	132	7.6
0500000US51077	51077	Grayson County, Virginia	6760	357	6760	(X)	4424	369	65.4	3.9	1469	205	21.7	2.4	3662	340	54.2	4.2	1121	165	16.6	2.1	236	98	3.5	1.4	112	78	1.7	1.1	526	155	7.8	2.2	236	95	3.5	1.3	2336	279	34.6	3.9	2089	257	30.9	3.7	1003	160	14.8
0500000US51079	51079	Greene County, Virginia	6802	230	6802	(X)	4892	346	71.9	4.6	2127	275	31.3	3.8	3904	332	57.4	5.1	1524	213	22.4	3.2	322	128	4.7	1.8	152	84	2.2	1.2	666	206	9.8	2.9	451	181	6.6	2.6	1910	322	28.1	4.6	1557	308	22.9	4.4	347	124	5.1
0500000US51081	51081	Greensville County, Virginia	3264	459	3264	(X)	2441	345	74.8	4.6	1013	212	31	4.1	1603	267	49.1	5	630	172	19.3	4.1	198	115	6.1	3	80	66	2.5	1.9	640	180	19.6	6	303	123	9.3	3.8	823	208	25.2	4.6	767	197	23.5	4.6	402	113	12.3
0500000US51083	51083	Halifax County, Virginia	14533	390	14533	(X)	9514	395	65.5	2.6	3623	249	24.9	1.6	6454	372	44.4	2.6	2048	250	14.1	1.7	532	159	3.7	1.1	250	94	1.7	0.6	2528	310	17.4	2	1325	193	9.1	1.3	5019	425	34.5	2.6	4633	410	31.9	2.5	2206	271	15.2
0500000US51085	51085	Hanover County, Virginia	36489	268	36489	(X)	28190	553	77.3	1.4	12882	421	35.3	1.2	23617	643	64.7	1.6	10521	448	28.8	1.2	1132	258	3.1	0.7	564	169	1.5	0.5	3441	357	9.4	1	1797	263	4.9	0.7	8299	515	22.7	1.4	7090	455	19.4	1.2	2887	283	7.9
0500000US51087	51087	Henrico County, Virginia	122919	848	122919	(X)	78760	1169	64.1	0.8	38629	906	31.4	0.7	56581	1131	46	0.9	25695	934	20.9	0.8	4353	507	3.5	0.4	2173	413	1.8	0.3	17826	712	14.5	0.6	10761	565	8.8	0.5	44159	1084	35.9	0.8	36570	1003	29.8	0.8	11204	540	9.1
0500000US51089	51089	Henry County, Virginia	22871	461	22871	(X)	15398	482	67.3	1.8	5849	372	25.6	1.6	10908	482	47.7	2	3308	331	14.5	1.5	1074	212	4.7	0.9	426	129	1.9	0.6	3416	351	14.9	1.5	2115	288	9.2	1.2	7473	468	32.7	1.8	6924	472	30.3	1.9	3162	312	13.8
0500000US51091	51091	Highland County, Virginia	1110	83	1110	(X)	771	57	69.5	7.5	172	39	15.5	3.8	635	83	57.2	8.3	138	36	12.4	3.4	49	32	4.4	2.9	22	22	2	2	87	56	7.8	5.1	12	15	1.1	1.4	339	104	30.5	7.5	309	96	27.8	7	117	52	10.5
0500000US51093	51093	Isle of Wight County, Virginia	13528	234	13528	(X)	10310	305	76.2	2.2	3845	246	28.4	1.7	8415	322	62.2	2.4	2852	235	21.1	1.7	371	127	2.7	1	150	83	1.1	0.6	1524	225	11.3	1.6	843	172	6.2	1.2	3218	325	23.8	2.2	2910	325	21.5	2.3	1046	174	7.7
0500000US51095	51095	James City County, Virginia	26356	452	26356	(X)	19199	461	72.8	1.8	7018	341	26.6	1.2	16263	563	61.7	2.1	5432	391	20.6	1.4	648	187	2.5	0.7	274	119	1	0.5	2288	355	8.7	1.4	1312	256	5	1	7157	522	27.2	1.8	5940	525	22.5	1.8	2791	331	10.6
0500000US51097	51097	King and Queen County, Virginia	2891	155	2891	(X)	2012	199	69.6	6.1	559	141	19.3	4.8	1618	204	56	6.8	447	111	15.5	3.8	72	51	2.5	1.8	0	95	0	1.3	322	121	11.1	4.1	112	97	3.9	3.3	879	189	30.4	6.1	790	173	27.3	5.7	345	103	11.9
0500000US51099	51099	King George County, Virginia	8200	303	8200	(X)	5986	358	73	3.6	3209	274	39.1	2.9	4812	317	58.7	3.5	2274	179	27.7	2.1	308	115	3.8	1.4	219	95	2.7	1.1	866	209	10.6	2.5	716	195	8.7	2.3	2214	310	27	3.6	1747	268	21.3	3.1	529	112	6.5
0500000US51101	51101	King William County, Virginia	5985	154	5985	(X)	4549	238	76	3.5	1942	191	32.4	3	3651	244	61	3.9	1503	175	25.1	2.9	219	87	3.7	1.5	66	42	1.1	0.7	679	166	11.3	2.7	373	149	6.2	2.4	1436	213	24	3.5	1232	220	20.6	3.6	495	113	8.3
0500000US51103	51103	Lancaster County, Virginia	5570	217	5570	(X)	3706	259	66.5	4	988	188	17.7	3.1	2800	199	50.3	3.5	472	122	8.5	2.2	238	143	4.3	2.5	216	141	3.9	2.5	668	145	12	2.6	300	92	5.4	1.6	1864	235	33.5	4	1691	228	30.4	3.9	943	158	16.9
0500000US51105	51105	Lee County, Virginia	10001	370	10001	(X)	6836	395	68.4	3.2	2562	280	25.6	2.8	5340	407	53.4	3.3	1861	280	18.6	2.8	597	151	6	1.6	213	95	2.1	0.9	899	216	9	2.1	488	150	4.9	1.5	3165	343	31.6	3.2	2897	310	29	2.9	1309	181	13.1
0500000US51107	51107	Loudoun County, Virginia	99761	874	99761	(X)	75923	1043	76.1	0.9	45269	832	45.4	0.8	64492	1097	64.6	1	38768	849	38.9	0.8	3285	374	3.3	0.4	1794	287	1.8	0.3	8146	759	8.2	0.8	4707	638	4.7	0.6	23838	967	23.9	0.9	19385	814	19.4	0.8	3716	346	3.7
0500000US51109	51109	Louisa County, Virginia	13213	350	13213	(X)	9538	417	72.2	2.5	3446	301	26.1	2.1	7406	391	56.1	2.7	2442	253	18.5	1.8	653	151	4.9	1.1	227	104	1.7	0.8	1479	271	11.2	2	777	164	5.9	1.2	3675	337	27.8	2.5	2970	286	22.5	2.2	951	156	7.2
0500000US51111	51111	Lunenburg County, Virginia	4471	335	4471	(X)	3000	310	67.1	4	1094	257	24.5	4.4	2196	280	49.1	4.5	713	228	15.9	4.3	175	96	3.9	2	76	61	1.7	1.3	629	117	14.1	2.7	305	95	6.8	2.1	1471	192	32.9	4	1306	179	29.2	3.5	666	113	14.9
0500000US51113	51113	Madison County, Virginia	5185	189	5185	(X)	3883	271	74.9	4.8	1363	172	26.3	3.1	3085	273	59.5	5.1	1071	171	20.7	3.3	246	114	4.7	2.2	137	89	2.6	1.7	552	164	10.6	3.1	155	103	3	2	1302	256	25.1	4.8	987	218	19	4	436	128	8.4
0500000US51115	51115	Mathews County, Virginia	3788	276	3788	(X)	2760	280	72.9	6	820	153	21.6	3.3	2033	236	53.7	5.8	581	146	15.3	3.5	215	103	5.7	2.7	82	62	2.2	1.6	512	183	13.5	4.6	157	90	4.1	2.3	1028	252	27.1	6	908	222	24	5.5	554	175	14.6
0500000US51117	51117	Mecklenburg County, Virginia	12547	403	12547	(X)	7971	382	63.5	2.7	2846	301	22.7	2.1	5804	326	46.3	2.6	1660	197	13.2	1.5	525	177	4.2	1.4	311	131	2.5	1	1642	222	13.1	1.7	875	202	7	1.6	4576	387	36.5	2.7	4068	360	32.4	2.6	1866	244	14.9
0500000US51119	51119	Middlesex County, Virginia	4339	274	4339	(X)	3137	329	72.3	5.3	759	201	17.5	4	2601	310	59.9	5.6	508	149	11.7	3	205	95	4.7	2.1	98	80	2.3	1.8	331	110	7.6	2.4	153	86	3.5	1.9	1202	232	27.7	5.3	1122	225	25.9	5.2	591	153	13.6
0500000US51121	51121	Montgomery County, Virginia	34591	804	34591	(X)	19209	537	55.5	1.4	8260	429	23.9	1.2	15361	601	44.4	1.6	6107	430	17.7	1.2	871	217	2.5	0.6	473	175	1.4	0.5	2977	347	8.6	1	1680	299	4.9	0.9	15382	710	44.5	1.4	9196	642	26.6	1.9	2483	283	7.2
0500000US51125	51125	Nelson County, Virginia	6539	349	6539	(X)	4441	317	67.9	4.4	1414	254	21.6	3.6	3353	306	51.3	4.1	972	228	14.9	3.2	225	95	3.4	1.5	44	34	0.7	0.5	863	189	13.2	3	398	154	6.1	2.4	2098	339	32.1	4.4	1801	310	27.5	4.3	745	177	11.4
0500000US51127	51127	New Kent County, Virginia	6552	208	6552	(X)	5094	258	77.7	3.9	1882	184	28.7	2.9	4225	251	64.5	4	1340	186	20.5	3	317	109	4.8	1.6	164	90	2.5	1.4	552	142	8.4	2.1	378	142	5.8	2.1	1458	273	22.3	3.9	1149	221	17.5	3.2	436	106	6.7
0500000US51131	51131	Northampton County, Virginia	5195	295	5195	(X)	3218	274	61.9	3.6	1027	143	19.8	2.3	2415	253	46.5	3.9	636	128	12.2	2.2	152	64	2.9	1.2	58	37	1.1	0.7	651	133	12.5	2.5	333	90	6.4	1.7	1977	212	38.1	3.6	1700	208	32.7	3.7	815	146	15.7
0500000US51133	51133	Northumberland County, Virginia	5569	357	5569	(X)	3658	370	65.7	5.2	989	202	17.8	3.3	3012	288	54.1	5.2	651	141	11.7	2.6	115	103	2.1	1.8	29	35	0.5	0.6	531	172	9.5	2.8	309	140	5.5	2.3	1911	320	34.3	5.2	1541	249	27.7	4.1	811	164	14.6
0500000US51135	51135	Nottoway County, Virginia	5571	229	5571	(X)	3828	264	68.7	4.1	1614	175	29	2.8	2636	242	47.3	4	1019	164	18.3	2.7	463	148	8.3	2.6	147	102	2.6	1.8	729	183	13.1	3.3	448	163	8	2.9	1743	246	31.3	4.1	1551	228	27.8	3.8	861	155	15.5
0500000US51137	51137	Orange County, Virginia	12614	374	12614	(X)	9446	431	74.9	2.6	3551	292	28.2	2.1	7522	414	59.6	3	2553	267	20.2	2	630	189	5	1.5	353	149	2.8	1.2	1294	233	10.3	1.8	645	160	5.1	1.3	3168	340	25.1	2.6	2620	307	20.8	2.4	967	182	7.7
0500000US51139	51139	Page County, Virginia	9538	280	9538	(X)	6744	306	70.7	2.8	2520	210	26.4	2	5206	297	54.6	2.9	1824	188	19.1	1.9	456	128	4.8	1.3	270	108	2.8	1.1	1082	229	11.3	2.4	426	134	4.5	1.4	2794	294	29.3	2.8	2332	229	24.4	2.2	1097	162	11.5
0500000US51141	51141	Patrick County, Virginia	7191	369	7191	(X)	4845	354	67.4	3.7	1562	242	21.7	2.9	3921	319	54.5	3.8	1080	209	15	2.6	151	85	2.1	1.2	57	50	0.8	0.7	773	159	10.7	2.1	425	127	5.9	1.7	2346	300	32.6	3.7	2219	277	30.9	3.4	1074	206	14.9
0500000US51143	51143	Pittsylvania County, Virginia	26325	481	26325	(X)	18577	558	70.6	1.7	6756	436	25.7	1.4	13786	530	52.4	1.8	4568	356	17.4	1.2	1577	233	6	0.9	650	163	2.5	0.6	3214	366	12.2	1.4	1538	277	5.8	1	7748	471	29.4	1.7	6913	444	26.3	1.6	3058	263	11.6
0500000US51145	51145	Powhatan County, Virginia	9468	303	9468	(X)	7581	309	80.1	2.5	3269	230	34.5	2.3	6502	308	68.7	2.9	2787	227	29.4	2.3	376	126	4	1.3	188	86	2	0.9	703	157	7.4	1.7	294	115	3.1	1.2	1887	255	19.9	2.5	1590	230	16.8	2.3	573	138	6.1
0500000US51147	51147	Prince Edward County, Virginia	7334	493	7334	(X)	4764	452	65	4.2	1886	231	25.7	2.6	3648	368	49.7	4.3	1325	201	18.1	2.8	188	107	2.6	1.4	119	79	1.6	1.1	928	253	12.7	3.2	442	184	6	2.3	2570	353	35	4.2	2150	308	29.3	4.5	806	192	11
0500000US51149	51149	Prince George County, Virginia	10725	623	10725	(X)	8523	548	79.5	2.4	3829	445	35.7	2.8	6652	490	62	3.1	2749	382	25.6	2.7	581	155	5.4	1.4	342	140	3.2	1.3	1290	236	12	2.1	738	187	6.9	1.7	2202	293	20.5	2.4	2007	277	18.7	2.3	745	158	6.9
0500000US51153	51153	Prince William County, Virginia	127170	872	127170	(X)	98731	1194	77.6	0.8	54617	1076	42.9	0.7	76194	1406	59.9	1.1	41493	1318	32.6	1	6421	604	5	0.5	3521	494	2.8	0.4	16116	1050	12.7	0.8	9603	825	7.6	0.6	28439	1007	22.4	0.8	22099	831	17.4	0.7	4998	372	3.9
0500000US51155	51155	Pulaski County, Virginia	14884	447	14884	(X)	9919	474	66.6	2.3	3170	324	21.3	1.9	7398	434	49.7	2.6	2139	271	14.4	1.7	800	199	5.4	1.3	320	127	2.1	0.8	1721	264	11.6	1.7	711	187	4.8	1.2	4965	356	33.4	2.3	4273	344	28.7	2.3	1666	225	11.2
0500000US51157	51157	Rappahannock County, Virginia	3310	158	3310	(X)	2242	194	67.7	5.1	874	142	26.4	3.7	1919	203	58	6	710	141	21.5	4	87	54	2.6	1.6	52	47	1.6	1.4	236	98	7.1	2.8	112	85	3.4	2.5	1068	177	32.3	5.1	903	153	27.3	4.3	392	122	11.8
0500000US51159	51159	Richmond County, Virginia	2909	273	2909	(X)	1922	229	66.1	5	647	133	22.2	4.1	1413	193	48.6	5.6	450	112	15.5	3.6	185	120	6.4	3.9	55	36	1.9	1.2	324	101	11.1	3.6	142	71	4.9	2.4	987	176	33.9	5	876	148	30.1	4.3	522	98	17.9
0500000US51161	51161	Roanoke County, Virginia	37975	400	37975	(X)	26169	596	68.9	1.4	11195	449	29.5	1.2	21390	657	56.3	1.6	8537	449	22.5	1.2	1264	291	3.3	0.8	702	215	1.8	0.6	3515	403	9.3	1.1	1956	325	5.2	0.9	11806	557	31.1	1.4	10277	514	27.1	1.3	4280	341	11.3
0500000US51163	51163	Rockbridge County, Virginia	9291	264	9291	(X)	6461	350	69.5	3.4	2096	254	22.6	2.7	5281	314	56.8	3.2	1524	197	16.4	2.1	442	136	4.8	1.5	209	98	2.2	1.1	738	185	7.9	1.9	363	147	3.9	1.6	2830	330	30.5	3.4	2466	330	26.5	3.4	1150	181	12.4
0500000US51165	51165	Rockingham County, Virginia	29711	435	29711	(X)	21657	500	72.9	1.4	8803	391	29.6	1.2	17439	407	58.7	1.2	6753	298	22.7	1	1221	215	4.1	0.7	577	146	1.9	0.5	2997	322	10.1	1.1	1473	223	5	0.7	8054	424	27.1	1.4	6743	419	22.7	1.3	3044	261	10.2
0500000US51167	51167	Russell County, Virginia	11302	373	11302	(X)	7920	387	70.1	2.9	2903	340	25.7	2.7	6316	347	55.9	2.9	2290	302	20.3	2.5	484	172	4.3	1.5	161	111	1.4	1	1120	237	9.9	2	452	150	4	1.3	3382	366	29.9	2.9	2936	358	26	3	1522	255	13.5
0500000US51169	51169	Scott County, Virginia	9701	282	9701	(X)	6641	305	68.5	2.4	2448	267	25.2	2.5	5290	327	54.5	2.9	1878	251	19.4	2.4	392	128	4	1.3	171	98	1.8	1	959	231	9.9	2.4	399	122	4.1	1.3	3060	247	31.5	2.4	2804	239	28.9	2.3	1451	172	15
0500000US51171	51171	Shenandoah County, Virginia	17152	379	17152	(X)	11662	401	68	2.1	4461	335	26	1.8	9134	394	53.3	2.3	3030	319	17.7	1.8	1016	276	5.9	1.6	591	223	3.4	1.3	1512	222	8.8	1.3	840	189	4.9	1.1	5490	390	32	2.1	4464	367	26	2	1962	253	11.4
0500000US51173	51173	Smyth County, Virginia	12681	311	12681	(X)	8557	400	67.5	2.7	3011	288	23.7	2.1	6264	396	49.4	2.8	1865	282	14.7	2.1	739	172	5.8	1.3	340	126	2.7	1	1554	231	12.3	1.8	806	207	6.4	1.6	4124	356	32.5	2.7	3652	338	28.8	2.6	1619	207	12.8
0500000US51175	51175	Southampton County, Virginia	6618	364	6618	(X)	4730	319	71.5	3	1929	222	29.1	2.6	3439	303	52	3.4	1253	183	18.9	2.5	287	103	4.3	1.5	187	91	2.8	1.3	1004	151	15.2	2.3	489	123	7.4	1.8	1888	226	28.5	3	1669	213	25.2	2.8	721	111	10.9
0500000US51177	51177	Spotsylvania County, Virginia	41282	441	41282	(X)	32753	631	79.3	1.3	17075	555	41.4	1.2	25424	825	61.6	1.9	12158	600	29.5	1.4	2045	393	5	0.9	1366	339	3.3	0.8	5284	455	12.8	1.1	3551	426	8.6	1	8529	539	20.7	1.3	6921	526	16.8	1.3	2610	269	6.3
0500000US51179	51179	Stafford County, Virginia	40691	519	40691	(X)	33150	679	81.5	1.2	17483	567	43	1.2	27203	678	66.9	1.4	13693	518	33.7	1.2	1835	292	4.5	0.7	1073	224	2.6	0.5	4112	355	10.1	0.9	2717	299	6.7	0.7	7541	503	18.5	1.2	6090	480	15	1.2	1724	196	4.2
0500000US51181	51181	Surry County, Virginia	2547	169	2547	(X)	1735	198	68.1	5.6	635	128	24.9	4.1	1256	167	49.3	5.8	378	88	14.8	3	160	82	6.3	3.1	96	68	3.8	2.6	319	102	12.5	3.7	161	72	6.3	2.7	812	146	31.9	5.6	743	146	29.2	5.7	329	97	12.9
0500000US51183	51183	Sussex County, Virginia	3600	356	3600	(X)	2087	284	58	4.9	678	156	18.8	3.8	1386	205	38.5	4.2	378	99	10.5	2.5	230	115	6.4	2.9	94	69	2.6	1.8	471	113	13.1	3.1	206	82	5.7	2.3	1513	222	42	4.9	1322	197	36.7	4.4	550	112	15.3
0500000US51185	51185	Tazewell County, Virginia	18019	413	18019	(X)	12817	454	71.1	2	4715	321	26.2	1.7	10022	512	55.6	2.6	3336	341	18.5	1.9	780	214	4.3	1.2	358	151	2	0.8	2015	286	11.2	1.6	1021	225	5.7	1.2	5202	390	28.9	2	4554	378	25.3	2	1890	233	10.5
0500000US51187	51187	Warren County, Virginia	14203	331	14203	(X)	9759	448	68.7	2.8	4381	305	30.8	2.1	7669	444	54	3	3330	295	23.4	2.1	620	182	4.4	1.3	258	110	1.8	0.8	1470	230	10.3	1.6	793	171	5.6	1.2	4444	419	31.3	2.8	3485	371	24.5	2.6	1225	179	8.6
0500000US51191	51191	Washington County, Virginia	23064	461	23064	(X)	16565	536	71.8	1.9	6174	403	26.8	1.6	12837	497	55.7	2.1	4353	377	18.9	1.6	1074	243	4.7	1	587	180	2.5	0.8	2654	365	11.5	1.5	1234	282	5.4	1.2	6499	467	28.2	1.9	5446	406	23.6	1.7	2131	242	9.2
0500000US51193	51193	Westmoreland County, Virginia	7077	399	7077	(X)	4579	353	64.7	3.4	1428	247	20.2	3	3268	259	46.2	3.7	822	178	11.6	2.4	424	167	6	2.2	213	123	3	1.7	887	207	12.5	2.7	393	154	5.6	2.1	2498	283	35.3	3.4	2160	273	30.5	3.4	986	176	13.9
0500000US51195	51195	Wise County, Virginia	15477	488	15477	(X)	10817	549	69.9	2.4	4247	332	27.4	1.8	8359	516	54	2.8	3119	289	20.2	1.6	738	183	4.8	1.2	296	135	1.9	0.9	1720	244	11.1	1.5	832	182	5.4	1.2	4660	373	30.1	2.4	4191	361	27.1	2.4	1502	199	9.7
0500000US51197	51197	Wythe County, Virginia	11610	393	11610	(X)	7828	399	67.4	3.2	2646	271	22.8	2.2	6026	401	51.9	3.4	1820	277	15.7	2.3	468	162	4	1.4	134	82	1.2	0.7	1334	241	11.5	2	692	190	6	1.6	3782	428	32.6	3.2	3334	414	28.7	3.2	1462	228	12.6
0500000US51199	51199	York County, Virginia	24259	396	24259	(X)	19435	501	80.1	1.5	9214	390	38	1.4	15808	533	65.2	1.9	7221	381	29.8	1.4	686	194	2.8	0.8	357	155	1.5	0.6	2941	277	12.1	1.1	1636	244	6.7	1	4824	366	19.9	1.5	4109	358	16.9	1.4	1489	205	6.1
0500000US51510	51510	Alexandria city, Virginia	64217	773	64217	(X)	29439	918	45.8	1.4	12147	653	18.9	1	21898	702	34.1	1.1	8140	449	12.7	0.7	2032	347	3.2	0.5	891	245	1.4	0.4	5509	581	8.6	0.9	3116	461	4.9	0.7	34778	1047	54.2	1.4	28906	1030	45	1.4	4609	381	7.2
0500000US51515	51515	Bedford city, Virginia	2776	192	2776	(X)	1770	155	63.8	7	800	169	28.8	6.1	1069	168	38.5	5.8	374	114	13.5	4.1	119	106	4.3	3.9	48	76	1.7	2.7	582	168	21	6.4	378	137	13.6	5	1006	244	36.2	7	953	242	34.3	7	330	121	11.9
0500000US51520	51520	Bristol city, Virginia	7873	235	7873	(X)	4938	287	62.7	3.8	1788	224	22.7	2.9	3024	256	38.4	3.4	865	171	11	2.2	464	153	5.9	1.9	335	143	4.3	1.8	1450	203	18.4	2.6	588	141	7.5	1.8	2935	340	37.3	3.8	2639	315	33.5	3.6	1166	178	14.8
0500000US51530	51530	Buena Vista city, Virginia	2681	130	2681	(X)	1734	184	64.7	6.8	759	150	28.3	5.5	1182	204	44.1	7.7	478	139	17.8	5.2	134	85	5	3.2	82	72	3.1	2.7	418	134	15.6	4.9	199	98	7.4	3.6	947	196	35.3	6.8	803	180	30	6.3	468	128	17.5
0500000US51540	51540	Charlottesville city, Virginia	17387	419	17387	(X)	7082	342	40.7	1.8	3174	240	18.3	1.3	5022	334	28.9	1.9	2121	178	12.2	1	444	138	2.6	0.8	147	88	0.8	0.5	1616	205	9.3	1.1	906	177	5.2	1	10305	410	59.3	1.8	6451	395	37.1	2.3	1548	183	8.9
0500000US51550	51550	Chesapeake city, Virginia	78898	523	78898	(X)	60047	865	76.1	1	28980	782	36.7	0.9	44928	908	56.9	1.1	20441	711	25.9	0.9	3509	469	4.4	0.6	1713	308	2.2	0.4	11610	677	14.7	0.9	6826	602	8.7	0.7	18851	840	23.9	1	15985	816	20.3	1	5401	398	6.8
0500000US51570	51570	Colonial Heights city, Virginia	7136	205	7136	(X)	4479	200	62.8	2.8	1625	185	22.8	2.5	3068	220	43	3.4	986	147	13.8	2.1	394	123	5.5	1.7	227	86	3.2	1.2	1017	166	14.3	2.2	412	130	5.8	1.8	2657	236	37.2	2.8	2195	245	30.8	3.1	1053	143	14.8
0500000US51580	51580	Covington city, Virginia	2546	139	2546	(X)	1467	166	57.6	6.3	552	112	21.7	4.2	1142	157	44.9	6.2	374	114	14.7	4.4	51	44	2	1.7	19	29	0.7	1.1	274	98	10.8	3.8	159	65	6.2	2.5	1079	183	42.4	6.3	948	179	37.2	6.3	485	118	19
0500000US51590	51590	Danville city, Virginia	18938	470	18938	(X)	11232	469	59.3	2.3	4196	331	22.2	1.7	6890	439	36.4	2.1	1984	252	10.5	1.3	733	169	3.9	0.9	320	99	1.7	0.5	3609	283	19.1	1.5	1892	211	10	1.1	7706	497	40.7	2.3	6963	521	36.8	2.5	2915	293	15.4
0500000US51595	51595	Emporia city, Virginia	2525	170	2525	(X)	1370	130	54.3	5.2	575	140	22.8	5.4	707	125	28	5.1	204	78	8.1	3.1	170	82	6.7	3.3	42	36	1.7	1.4	493	128	19.5	4.9	329	119	13	4.6	1155	176	45.7	5.2	992	182	39.3	5.7	378	86	15
0500000US51600	51600	Fairfax city, Virginia	8470	131	8470	(X)	5573	284	65.8	3.2	2346	228	27.7	2.7	4510	242	53.2	3	1953	202	23.1	2.4	367	131	4.3	1.5	63	42	0.7	0.5	696	157	8.2	1.8	330	128	3.9	1.5	2897	280	34.2	3.2	2053	266	24.2	3.2	678	154	8
0500000US51610	51610	Falls Church city, Virginia	4807	182	4807	(X)	3129	197	65.1	4	1688	178	35.1	3.6	2601	182	54.1	3.8	1356	152	28.2	3.2	103	55	2.1	1.1	80	58	1.7	1.2	425	95	8.8	2	252	84	5.2	1.7	1678	222	34.9	4	1457	218	30.3	4.1	431	94	9
0500000US51620	51620	Franklin city, Virginia	3472	173	3472	(X)	2266	224	65.3	5.5	997	179	28.7	4.6	1399	172	40.3	4.6	536	140	15.4	3.9	65	48	1.9	1.4	24	32	0.7	0.9	802	140	23.1	3.8	437	107	12.6	2.9	1206	202	34.7	5.5	1107	200	31.9	5.5	528	125	15.2
0500000US51630	51630	Fredericksburg city, Virginia	9341	416	9341	(X)	4888	400	52.3	3.5	2488	305	26.6	2.9	3167	292	33.9	3.1	1478	207	15.8	2.2	419	155	4.5	1.6	233	117	2.5	1.3	1302	267	13.9	2.6	777	201	8.3	2	4453	379	47.7	3.5	3632	360	38.9	3.8	894	168	9.6
0500000US51640	51640	Galax city, Virginia	3525	272	3525	(X)	1685	189	47.8	5.5	600	167	17	5	1074	211	30.5	5.5	227	131	6.4	3.7	90	74	2.6	2.1	18	30	0.5	0.8	521	150	14.8	4.5	355	149	10.1	4.4	1840	281	52.2	5.5	1511	330	42.9	6.9	652	175	18.5
0500000US51650	51650	Hampton city, Virginia	52667	759	52667	(X)	32998	744	62.7	1.5	14283	638	27.1	1.2	22828	789	43.3	1.5	8592	518	16.3	1	1874	350	3.6	0.7	743	210	1.4	0.4	8296	534	15.8	1	4948	429	9.4	0.8	19669	906	37.3	1.5	16500	794	31.3	1.3	4902	422	9.3
0500000US51660	51660	Harrisonburg city, Virginia	15179	454	15179	(X)	7990	485	52.6	2.8	3538	362	23.3	2.3	5862	483	38.6	3	2338	299	15.4	2	714	227	4.7	1.5	344	153	2.3	1	1414	280	9.3	1.8	856	267	5.6	1.7	7189	480	47.4	2.8	3798	368	25	2.5	1251	186	8.2
0500000US51670	51670	Hopewell city, Virginia	8859	307	8859	(X)	5034	370	56.8	4.1	1868	325	21.1	3.6	2907	340	32.8	3.8	696	233	7.9	2.6	482	188	5.4	2.1	196	137	2.2	1.6	1645	220	18.6	2.5	976	203	11	2.3	3825	416	43.2	4.1	3233	310	36.5	3.4	1130	164	12.8
0500000US51678	51678	Lexington city, Virginia	1727	838	1727	(X)	833	408	48.2	8.6	361	200	20.9	6.6	707	359	40.9	8.5	292	177	16.9	6.3	0	95	0	2.1	0	95	0	2.1	126	83	7.3	3.6	69	61	4	3.1	894	477	51.8	8.6	720	368	41.7	8.6	367	178	21.3
0500000US51680	51680	Lynchburg city, Virginia	28513	483	28513	(X)	16308	542	57.2	1.8	7145	390	25.1	1.3	11591	491	40.7	1.7	4592	344	16.1	1.2	1127	254	4	0.9	562	165	2	0.6	3590	383	12.6	1.3	1991	269	7	0.9	12205	583	42.8	1.8	9626	537	33.8	1.8	3667	335	12.9
0500000US51683	51683	Manassas city, Virginia	11872	301	11872	(X)	8674	378	73.1	2.9	4518	338	38.1	2.7	6394	429	53.9	3.5	3248	341	27.4	2.8	772	224	6.5	1.9	382	182	3.2	1.5	1508	283	12.7	2.4	888	215	7.5	1.8	3198	372	26.9	2.9	2520	297	21.2	2.4	603	167	5.1
0500000US51685	51685	Manassas Park city, Virginia	4238	200	4238	(X)	3156	226	74.5	3.9	1685	228	39.8	4.7	2310	236	54.5	4.9	1248	186	29.4	3.9	265	103	6.3	2.5	171	88	4	2.1	581	162	13.7	3.7	266	117	6.3	2.7	1082	171	25.5	3.9	902	158	21.3	3.7	248	106	5.9
0500000US51690	51690	Martinsville city, Virginia	5958	251	5958	(X)	3611	222	60.6	3.6	1634	189	27.4	3.1	2144	187	36	3.3	769	147	12.9	2.5	362	116	6.1	2	194	92	3.3	1.5	1105	165	18.5	2.6	671	136	11.3	2.2	2347	260	39.4	3.6	2084	238	35	3.5	809	159	13.6
0500000US51700	51700	Newport News city, Virginia	69977	796	69977	(X)	45141	856	64.5	1.1	21575	750	30.8	1	29363	839	42	1.2	12122	601	17.3	0.9	3637	444	5.2	0.6	1956	328	2.8	0.5	12141	572	17.3	0.8	7497	512	10.7	0.7	24836	886	35.5	1.1	19801	803	28.3	1.1	5824	435	8.3
0500000US51710	51710	Norfolk city, Virginia	85076	976	85076	(X)	49550	753	58.2	0.8	23348	798	27.4	0.9	29995	764	35.3	0.9	11915	579	14	0.7	4703	498	5.5	0.6	2254	376	2.6	0.4	14852	608	17.5	0.7	9179	543	10.8	0.6	35526	922	41.8	0.8	28387	882	33.4	0.9	7649	386	9
0500000US51720	51720	Norton city, Virginia	1750	167	1750	(X)	944	127	53.9	7.5	437	104	25	6.6	620	124	35.4	7.5	246	80	14.1	4.8	65	89	3.7	5	33	39	1.9	2.2	259	96	14.8	5.5	158	92	9	5.3	806	177	46.1	7.5	646	162	36.9	7.7	206	82	11.8
0500000US51730	51730	Petersburg city, Virginia	12179	381	12179	(X)	6766	350	55.6	2.3	2268	288	18.6	2.1	3365	295	27.6	2.3	758	174	6.2	1.3	446	135	3.7	1.1	86	62	0.7	0.5	2955	319	24.3	2.6	1424	239	11.7	1.9	5413	335	44.4	2.3	4212	357	34.6	2.7	1561	207	12.8
0500000US51735	51735	Poquoson city, Virginia	4525	97	4525	(X)	3696	150	81.7	3.1	1578	137	34.9	2.9	3002	158	66.3	3.4	1143	119	25.3	2.6	247	83	5.5	1.8	114	67	2.5	1.5	447	124	9.9	2.7	321	120	7.1	2.6	829	145	18.3	3.1	753	143	16.6	3.1	385	95	8.5
0500000US51740	51740	Portsmouth city, Virginia	36899	840	36899	(X)	23605	703	64	1.5	10097	567	27.4	1.3	13657	534	37	1.6	4668	401	12.7	1.1	2177	417	5.9	1.1	997	268	2.7	0.7	7771	581	21.1	1.5	4432	463	12	1.2	13294	688	36	1.5	11089	613	30.1	1.5	3610	356	9.8
0500000US51750	51750	Radford city, Virginia	5644	304	5644	(X)	2342	211	41.5	3.3	1024	132	18.1	2.4	1665	208	29.5	3.5	600	124	10.6	2.2	181	79	3.2	1.4	88	60	1.6	1.1	496	129	8.8	2.2	336	105	6	1.8	3302	279	58.5	3.3	2180	257	38.6	4.8	557	149	9.9
0500000US51760	51760	Richmond city, Virginia	83615	1175	83615	(X)	40222	895	48.1	0.9	17906	762	21.4	0.9	20382	861	24.4	1	7022	500	8.4	0.6	3983	387	4.8	0.5	1632	296	2	0.4	15857	713	19	0.8	9252	639	11.1	0.8	43393	1034	51.9	0.9	33584	951	40.2	1.1	8427	466	10.1
0500000US51770	51770	Roanoke city, Virginia	42892	551	42892	(X)	23326	886	54.4	1.9	9312	619	21.7	1.4	13810	831	32.2	1.9	4403	443	10.3	1	1807	331	4.2	0.8	707	211	1.6	0.5	7709	522	18	1.2	4202	433	9.8	1	19566	820	45.6	1.9	16713	755	39	1.8	5439	414	12.7
0500000US51775	51775	Salem city, Virginia	9944	260	9944	(X)	6229	307	62.6	2.9	2524	231	25.4	2.3	4520	268	45.5	2.7	1676	200	16.9	2	409	129	4.1	1.3	204	99	2.1	1	1300	240	13.1	2.4	644	173	6.5	1.7	3715	325	37.4	2.9	3111	286	31.3	2.7	1286	178	12.9
0500000US51790	51790	Staunton city, Virginia	10517	299	10517	(X)	5840	371	55.5	3.3	2044	246	19.4	2.1	4246	333	40.4	3.1	1383	213	13.2	1.9	351	95	3.3	0.9	97	58	0.9	0.5	1243	216	11.8	2	564	155	5.4	1.4	4677	383	44.5	3.3	4140	353	39.4	3.1	1648	190	15.7
0500000US51800	51800	Suffolk city, Virginia	30305	497	30305	(X)	22530	581	74.3	1.7	10722	536	35.4	1.6	16467	576	54.3	1.8	7302	422	24.1	1.3	1257	283	4.1	0.9	655	216	2.2	0.7	4806	433	15.9	1.4	2765	350	9.1	1.1	7775	544	25.7	1.7	6609	504	21.8	1.6	2265	258	7.5
0500000US51810	51810	Virginia Beach city, Virginia	164041	1000	164041	(X)	112295	1249	68.5	0.6	53690	1055	32.7	0.6	84093	1411	51.3	0.8	36590	926	22.3	0.5	6551	600	4	0.4	3366	449	2.1	0.3	21651	1049	13.2	0.6	13734	913	8.4	0.5	51746	1117	31.5	0.6	39204	1048	23.9	0.6	11991	631	7.3
0500000US51820	51820	Waynesboro city, Virginia	8750	220	8750	(X)	5613	338	64.1	3.4	2268	229	25.9	2.5	4034	337	46.1	3.6	1237	187	14.1	2.1	343	127	3.9	1.4	233	113	2.7	1.3	1236	180	14.1	2	798	162	9.1	1.9	3137	308	35.9	3.4	2529	281	28.9	3.1	1256	153	14.4
0500000US51830	51830	Williamsburg city, Virginia	4206	378	4206	(X)	2076	219	49.4	5.3	608	151	14.5	3.4	1608	220	38.2	5.3	355	108	8.4	2.5	121	69	2.9	1.6	35	36	0.8	0.9	347	129	8.3	3	218	111	5.2	2.6	2130	355	50.6	5.3	1536	273	36.5	4.9	558	114	13.3
0500000US51840	51840	Winchester city, Virginia	10147	338	10147	(X)	5614	294	55.3	2.5	2599	254	25.6	2.5	3822	300	37.7	2.7	1449	215	14.3	2.1	431	165	4.2	1.6	320	130	3.2	1.3	1361	228	13.4	2.3	830	180	8.2	1.8	4533	320	44.7	2.5	3588	301	35.4	2.6	1157	141	11.4
0500000US54001	54001	Barbour County, West Virginia	6210	223	6210	(X)	4401	193	70.9	3.1	1369	150	22	2.3	3392	199	54.6	3.2	933	123	15	2	361	106	5.8	1.7	155	69	2.5	1.1	648	145	10.4	2.3	281	127	4.5	2	1809	226	29.1	3.1	1676	210	27	2.9	787	109	12.7
0500000US54003	54003	Berkeley County, West Virginia	39303	622	39303	(X)	27078	686	68.9	1.5	11882	564	30.2	1.3	20404	767	51.9	1.8	7857	508	20	1.2	2098	350	5.3	0.9	1275	259	3.2	0.7	4576	445	11.6	1.1	2750	362	7	0.9	12225	646	31.1	1.5	10048	619	25.6	1.5	2828	283	7.2
0500000US54005	54005	Boone County, West Virginia	9755	286	9755	(X)	7031	336	72.1	2.8	2814	265	28.8	2.3	5549	343	56.9	3.2	2192	226	22.5	2.1	460	136	4.7	1.4	138	74	1.4	0.8	1022	173	10.5	1.7	484	128	5	1.3	2724	291	27.9	2.8	2455	280	25.2	2.7	1105	176	11.3
0500000US54007	54007	Braxton County, West Virginia	6087	280	6087	(X)	3880	293	63.7	3.6	1236	168	20.3	2.5	3151	248	51.8	3.2	867	143	14.2	2.3	276	95	4.5	1.5	140	83	2.3	1.3	453	110	7.4	1.8	229	80	3.8	1.3	2207	234	36.3	3.6	1857	219	30.5	3.5	771	136	12.7
0500000US54009	54009	Brooke County, West Virginia	9756	253	9756	(X)	6482	314	66.4	2.9	2329	225	23.9	2.1	4780	269	49	2.6	1415	189	14.5	1.9	575	146	5.9	1.5	241	87	2.5	0.9	1127	209	11.6	2.1	673	171	6.9	1.7	3274	300	33.6	2.9	2921	272	29.9	2.6	1439	190	14.7
0500000US54011	54011	Cabell County, West Virginia	40397	481	40397	(X)	24963	710	61.8	1.6	9785	486	24.2	1.2	17868	680	44.2	1.7	5845	426	14.5	1.1	1551	242	3.8	0.6	818	195	2	0.5	5544	432	13.7	1	3122	358	7.7	0.9	15434	666	38.2	1.6	12771	651	31.6	1.6	4819	328	11.9
0500000US54013	54013	Calhoun County, West Virginia	3146	168	3146	(X)	2161	208	68.7	5.1	784	146	24.9	4	1589	208	50.5	5.8	489	126	15.5	3.7	243	107	7.7	3.4	122	74	3.9	2.3	329	98	10.5	3.1	173	82	5.5	2.6	985	162	31.3	5.1	938	162	29.8	5.1	377	79	12
0500000US54015	54015	Clay County, West Virginia	3512	159	3512	(X)	2509	197	71.4	4.7	987	163	28.1	4.4	2018	204	57.5	5.2	807	161	23	4.4	180	84	5.1	2.4	29	32	0.8	0.9	311	106	8.9	3	151	80	4.3	2.3	1003	172	28.6	4.7	936	169	26.7	4.6	521	126	14.8
0500000US54017	54017	Doddridge County, West Virginia	2823	194	2823	(X)	2049	191	72.6	4.4	675	143	23.9	4.3	1470	194	52.1	5	368	108	13	3.4	208	107	7.4	3.7	134	87	4.7	3.1	371	108	13.1	3.9	173	80	6.1	2.8	774	135	27.4	4.4	685	131	24.3	4.3	392	87	13.9
0500000US54019	54019	Fayette County, West Virginia	17801	405	17801	(X)	12040	422	67.6	2.1	4299	318	24.2	1.7	8867	358	49.8	2.1	2860	265	16.1	1.5	917	178	5.2	1	437	133	2.5	0.7	2256	259	12.7	1.4	1002	177	5.6	1	5761	426	32.4	2.1	4958	409	27.9	2.1	2293	262	12.9
0500000US54021	54021	Gilmer County, West Virginia	2420	391	2420	(X)	1548	289	64	4.6	526	218	21.7	6.1	1190	235	49.2	5	400	190	16.5	5.9	111	63	4.6	2.3	42	38	1.7	1.5	247	84	10.2	3.2	84	46	3.5	1.7	872	165	36	4.6	700	136	28.9	4.8	352	102	14.5
0500000US54023	54023	Grant County, West Virginia	4915	178	4915	(X)	3452	250	70.2	4.3	1264	164	25.7	2.9	2885	214	58.7	4	966	144	19.7	2.7	179	86	3.6	1.7	97	64	2	1.3	388	101	7.9	2	201	83	4.1	1.6	1463	217	29.8	4.3	1248	199	25.4	4	685	151	13.9
0500000US54025	54025	Greenbrier County, West Virginia	15412	377	15412	(X)	10009	455	64.9	2.7	3695	289	24	1.7	7589	429	49.2	2.7	2568	275	16.7	1.7	746	198	4.8	1.3	259	121	1.7	0.8	1674	251	10.9	1.6	868	213	5.6	1.4	5403	447	35.1	2.7	4607	407	29.9	2.5	2196	260	14.2
0500000US54027	54027	Hampshire County, West Virginia	10331	337	10331	(X)	5592	337	54.1	2.8	2163	221	20.9	2	4325	303	41.9	2.8	1420	186	13.7	1.7	266	112	2.6	1.1	97	76	0.9	0.7	1001	210	9.7	2	646	182	6.3	1.8	4739	338	45.9	2.8	4411	343	42.7	3	1416	192	13.7
0500000US54029	54029	Hancock County, West Virginia	13149	318	13149	(X)	8839	373	67.2	2.7	3398	264	25.8	1.8	6653	361	50.6	2.8	2251	258	17.1	1.9	666	142	5.1	1.1	367	129	2.8	1	1520	252	11.6	1.9	780	191	5.9	1.4	4310	393	32.8	2.7	3807	384	29	2.7	1736	229	13.2
0500000US54031	54031	Hardy County, West Virginia	4829	280	4829	(X)	3055	280	63.3	4.5	831	149	17.2	2.9	2430	229	50.3	4	522	105	10.8	2.2	230	94	4.8	1.9	98	59	2	1.2	395	106	8.2	2.2	211	90	4.4	1.8	1774	239	36.7	4.5	1575	232	32.6	4.5	507	119	10.5
0500000US54033	54033	Harrison County, West Virginia	27696	471	27696	(X)	18809	583	67.9	1.9	7286	400	26.3	1.4	14283	542	51.6	1.8	4948	383	17.9	1.4	1012	218	3.7	0.8	518	165	1.9	0.6	3514	375	12.7	1.4	1820	258	6.6	0.9	8887	571	32.1	1.9	7869	534	28.4	1.8	3323	266	12
0500000US54035	54035	Jackson County, West Virginia	11483	253	11483	(X)	8066	366	70.2	2.9	3237	327	28.2	2.7	6333	391	55.2	3.2	2211	302	19.3	2.6	534	176	4.7	1.5	334	143	2.9	1.2	1199	266	10.4	2.3	692	246	6	2.1	3417	345	29.8	2.9	2764	292	24.1	2.5	1232	208	10.7
0500000US54037	54037	Jefferson County, West Virginia	19415	374	19415	(X)	13928	498	71.7	2.4	5657	315	29.1	1.6	11141	525	57.4	2.6	4395	336	22.6	1.7	874	180	4.5	0.9	331	129	1.7	0.7	1913	313	9.9	1.6	931	229	4.8	1.2	5487	489	28.3	2.4	4222	406	21.7	2	1474	195	7.6
0500000US54039	54039	Kanawha County, West Virginia	82337	874	82337	(X)	50461	905	61.3	1	18910	748	23	0.9	37517	852	45.6	1	12267	604	14.9	0.7	3102	397	3.8	0.5	1517	328	1.8	0.4	9842	546	12	0.6	5126	462	6.2	0.6	31876	954	38.7	1	27457	922	33.3	1	10328	533	12.5
0500000US54041	54041	Lewis County, West Virginia	6587	245	6587	(X)	4340	263	65.9	3.3	1520	161	23.1	2.2	3510	246	53.3	3.5	987	143	15	2.1	222	89	3.4	1.3	82	57	1.2	0.9	608	128	9.2	1.8	451	114	6.8	1.6	2247	238	34.1	3.3	1951	231	29.6	3.3	829	152	12.6
0500000US54043	54043	Lincoln County, West Virginia	8711	234	8711	(X)	6523	307	74.9	2.9	2808	241	32.2	2.6	4839	330	55.6	3.6	1890	268	21.7	3	437	167	5	1.9	216	125	2.5	1.4	1247	237	14.3	2.7	702	196	8.1	2.3	2188	256	25.1	2.9	2051	253	23.5	2.9	878	178	10.1
0500000US54045	54045	Logan County, West Virginia	14660	327	14660	(X)	10361	437	70.7	2.6	3688	319	25.2	2.1	7744	447	52.8	2.9	2738	311	18.7	2.1	767	200	5.2	1.4	298	144	2	1	1850	211	12.6	1.4	652	137	4.4	0.9	4299	393	29.3	2.6	3580	342	24.4	2.3	1577	204	10.8
0500000US54047	54047	McDowell County, West Virginia	8292	297	8292	(X)	5376	245	64.8	2.7	1677	211	20.2	2.4	3936	261	47.5	3.1	1002	190	12.1	2.3	409	103	4.9	1.2	172	67	2.1	0.8	1031	168	12.4	2	503	127	6.1	1.5	2916	271	35.2	2.7	2579	246	31.1	2.6	1200	163	14.5
0500000US54049	54049	Marion County, West Virginia	22794	421	22794	(X)	14888	405	65.3	1.7	5939	347	26.1	1.5	11288	426	49.5	1.8	4023	291	17.6	1.2	988	181	4.3	0.8	500	133	2.2	0.6	2612	276	11.5	1.2	1416	236	6.2	1	7906	463	34.7	1.7	6477	460	28.4	1.8	2883	291	12.6
0500000US54051	54051	Marshall County, West Virginia	13915	303	13915	(X)	9365	354	67.3	2.4	3456	296	24.8	2	7260	333	52.2	2.5	2304	284	16.6	2	698	190	5	1.4	455	151	3.3	1.1	1407	270	10.1	1.9	697	177	5	1.2	4550	368	32.7	2.4	3914	350	28.1	2.3	1953	196	14
0500000US54053	54053	Mason County, West Virginia	10715	301	10715	(X)	7351	365	68.6	2.9	2827	289	26.4	2.5	5712	353	53.3	3	1956	239	18.3	2.1	326	155	3	1.4	141	90	1.3	0.8	1313	245	12.3	2.3	730	204	6.8	1.9	3364	324	31.4	2.9	2832	323	26.4	2.9	1135	193	10.6
0500000US54055	54055	Mercer County, West Virginia	25611	467	25611	(X)	16194	568	63.2	2	5742	391	22.4	1.5	12644	559	49.4	2	3942	350	15.4	1.3	1017	203	4	0.8	484	153	1.9	0.6	2533	338	9.9	1.3	1316	273	5.1	1.1	9417	545	36.8	2	8251	519	32.2	1.9	3579	327	14
0500000US54057	54057	Mineral County, West Virginia	11276	317	11276	(X)	7065	362	62.7	2.7	2579	236	22.9	1.9	5550	345	49.2	2.9	1696	208	15	1.8	313	103	2.8	0.9	120	67	1.1	0.6	1202	201	10.7	1.7	763	186	6.8	1.6	4211	333	37.3	2.7	3846	342	34.1	2.9	1831	223	16.2
0500000US54059	54059	Mingo County, West Virginia	10776	283	10776	(X)	7358	315	68.3	2.6	2437	262	22.6	2.4	5430	274	50.4	2.3	1716	202	15.9	1.8	574	166	5.3	1.5	192	113	1.8	1	1354	185	12.6	1.7	529	142	4.9	1.3	3418	302	31.7	2.6	2953	295	27.4	2.6	1021	201	9.5
0500000US54061	54061	Monongalia County, West Virginia	35266	667	35266	(X)	18606	448	52.8	1.4	7559	409	21.4	1.1	14813	497	42	1.6	5602	345	15.9	1	1272	212	3.6	0.6	620	142	1.8	0.4	2521	281	7.1	0.8	1337	219	3.8	0.6	16660	703	47.2	1.4	12562	679	35.6	1.6	2344	275	6.6
0500000US54063	54063	Monroe County, West Virginia	5615	224	5615	(X)	3839	244	68.4	4	1199	166	21.4	2.7	3177	247	56.6	4.1	931	140	16.6	2.2	253	95	4.5	1.7	117	75	2.1	1.3	409	108	7.3	1.9	151	77	2.7	1.4	1776	252	31.6	4	1512	246	26.9	4.1	579	127	10.3
0500000US54065	54065	Morgan County, West Virginia	7171	297	7171	(X)	3874	364	54	4.4	1254	237	17.5	3.1	3062	339	42.7	4.5	859	195	12	2.6	258	105	3.6	1.4	139	88	1.9	1.2	554	159	7.7	2.1	256	109	3.6	1.5	3297	339	46	4.4	3005	308	41.9	4	1195	155	16.7
0500000US54067	54067	Nicholas County, West Virginia	10149	347	10149	(X)	7593	367	74.8	2.6	2540	270	25	2.4	6233	384	61.4	3.4	2007	242	19.8	2.3	500	152	4.9	1.5	218	114	2.1	1.1	860	191	8.5	1.9	315	131	3.1	1.3	2556	285	25.2	2.6	2374	285	23.4	2.7	1196	203	11.8
0500000US54069	54069	Ohio County, West Virginia	18624	404	18624	(X)	11080	381	59.5	1.9	4066	294	21.8	1.4	8708	369	46.8	1.9	2904	218	15.6	1.1	456	115	2.4	0.6	234	88	1.3	0.5	1916	240	10.3	1.3	928	164	5	0.9	7544	409	40.5	1.9	6763	445	36.3	2.2	2770	275	14.9
0500000US54071	54071	Pendleton County, West Virginia	3305	199	3305	(X)	2140	196	64.8	4.7	735	125	22.2	3.6	1777	177	53.8	4.6	563	110	17	3.3	98	55	3	1.7	46	48	1.4	1.5	265	90	8	2.6	126	71	3.8	2.1	1165	176	35.2	4.7	1024	165	31	4.6	601	118	18.2
0500000US54073	54073	Pleasants County, West Virginia	2630	136	2630	(X)	1735	129	66	4.3	582	104	22.1	3.7	1424	126	54.1	4.6	424	79	16.1	2.9	87	55	3.3	2	57	50	2.2	1.9	224	79	8.5	3	101	49	3.8	1.8	895	132	34	4.3	772	123	29.4	4.2	403	84	15.3
0500000US54075	54075	Pocahontas County, West Virginia	3819	239	3819	(X)	2568	239	67.2	4.3	901	141	23.6	3	2140	214	56	4.4	703	115	18.4	2.6	182	77	4.8	1.9	68	40	1.8	1	246	89	6.4	2.3	130	72	3.4	1.8	1251	174	32.8	4.3	1099	167	28.8	4.3	523	122	13.7
0500000US54077	54077	Preston County, West Virginia	12908	273	12908	(X)	9056	343	70.2	2.2	3388	266	26.2	2	7163	366	55.5	2.6	2521	244	19.5	1.8	607	156	4.7	1.2	202	100	1.6	0.8	1286	199	10	1.5	665	163	5.2	1.3	3852	298	29.8	2.2	3248	282	25.2	2.2	1384	190	10.7
0500000US54079	54079	Putnam County, West Virginia	20999	371	20999	(X)	15839	458	75.4	1.9	6874	453	32.7	2	13123	454	62.5	2.1	5439	393	25.9	1.9	777	195	3.7	0.9	342	128	1.6	0.6	1939	327	9.2	1.5	1093	251	5.2	1.2	5160	415	24.6	1.9	4415	408	21	1.9	1584	199	7.5
0500000US54081	54081	Raleigh County, West Virginia	31211	576	31211	(X)	20697	680	66.3	1.9	7991	463	25.6	1.4	16008	556	51.3	1.6	5663	418	18.1	1.3	1230	268	3.9	0.9	573	184	1.8	0.6	3459	367	11.1	1.2	1755	273	5.6	0.9	10514	652	33.7	1.9	9253	646	29.6	1.9	4139	405	13.3
0500000US54083	54083	Randolph County, West Virginia	11276	327	11276	(X)	7801	371	69.2	2.7	2847	267	25.2	2.1	6219	346	55.2	2.6	2022	259	17.9	2.2	503	141	4.5	1.2	239	96	2.1	0.8	1079	168	9.6	1.5	586	137	5.2	1.2	3475	317	30.8	2.7	3254	304	28.9	2.6	1271	181	11.3
0500000US54085	54085	Ritchie County, West Virginia	4127	171	4127	(X)	2772	176	67.2	4.1	1015	114	24.6	2.7	2132	160	51.7	3.8	685	96	16.6	2.3	217	77	5.3	1.8	73	47	1.8	1.1	423	87	10.2	2.1	257	67	6.2	1.6	1355	194	32.8	4.1	1191	175	28.9	3.9	468	112	11.3
0500000US54087	54087	Roane County, West Virginia	5970	199	5970	(X)	3894	244	65.2	3.8	1370	169	22.9	2.6	3184	223	53.3	3.6	1063	142	17.8	2.2	133	74	2.2	1.2	44	51	0.7	0.8	577	157	9.7	2.6	263	112	4.4	1.9	2076	250	34.8	3.8	1801	240	30.2	3.8	913	139	15.3
0500000US54089	54089	Summers County, West Virginia	5108	275	5108	(X)	3346	231	65.5	3.1	989	149	19.4	2.7	2654	232	52	3.7	757	136	14.8	2.4	273	96	5.3	1.8	106	65	2.1	1.3	419	108	8.2	2.1	126	68	2.5	1.3	1762	194	34.5	3.1	1604	199	31.4	3.4	752	148	14.7
0500000US54091	54091	Taylor County, West Virginia	6592	257	6592	(X)	4733	319	71.8	3.7	1756	229	26.6	3.1	3729	255	56.6	3.7	1301	205	19.7	2.9	244	97	3.7	1.4	34	35	0.5	0.5	760	188	11.5	2.7	421	137	6.4	2	1859	252	28.2	3.7	1641	238	24.9	3.5	851	159	12.9
0500000US54093	54093	Tucker County, West Virginia	3215	174	3215	(X)	2193	153	68.2	3.8	751	101	23.4	2.6	1826	151	56.8	4.1	579	96	18	2.7	111	50	3.5	1.6	52	35	1.6	1.1	256	86	8	2.6	120	52	3.7	1.6	1022	143	31.8	3.8	888	139	27.6	3.8	428	84	13.3
0500000US54095	54095	Tyler County, West Virginia	3752	194	3752	(X)	2643	191	70.4	3.9	858	129	22.9	3	2091	174	55.7	4.1	621	112	16.6	2.7	213	95	5.7	2.5	95	55	2.5	1.5	339	106	9	2.8	142	73	3.8	1.9	1109	164	29.6	3.9	993	155	26.5	3.8	568	105	15.1
0500000US54097	54097	Upshur County, West Virginia	9139	331	9139	(X)	6217	352	68	3.1	2313	288	25.3	2.8	5036	350	55.1	3.3	1782	251	19.5	2.5	350	118	3.8	1.3	128	79	1.4	0.9	831	171	9.1	1.9	403	130	4.4	1.4	2922	306	32	3.1	2477	276	27.1	2.9	1102	188	12.1
0500000US54099	54099	Wayne County, West Virginia	16833	319	16833	(X)	11419	394	67.8	2	4319	332	25.7	1.8	8872	367	52.7	2.1	3080	272	18.3	1.6	615	187	3.7	1.1	274	130	1.6	0.8	1932	293	11.5	1.7	965	223	5.7	1.3	5414	362	32.2	2	4716	354	28	2	2181	251	13
0500000US54101	54101	Webster County, West Virginia	4020	192	4020	(X)	2919	231	72.6	4.7	1145	141	28.5	3.2	2281	206	56.7	5	801	133	19.9	3.3	200	83	5	2	106	57	2.6	1.4	438	119	10.9	2.8	238	91	5.9	2.2	1101	197	27.4	4.7	956	184	23.8	4.5	421	103	10.5
0500000US54103	54103	Wetzel County, West Virginia	6957	212	6957	(X)	4808	256	69.1	3.1	1718	168	24.7	2.3	3869	246	55.6	3.4	1226	164	17.6	2.3	221	81	3.2	1.2	102	56	1.5	0.8	718	153	10.3	2.1	390	125	5.6	1.7	2149	229	30.9	3.1	2028	231	29.2	3.2	1037	171	14.9
0500000US54105	54105	Wirt County, West Virginia	2325	182	2325	(X)	1629	216	70.1	6.7	513	143	22.1	5.2	1338	238	57.5	8.1	357	126	15.4	4.8	55	47	2.4	2	30	33	1.3	1.4	236	107	10.2	4.8	126	69	5.4	2.9	696	157	29.9	6.7	531	148	22.8	6.2	193	88	8.3
0500000US54107	54107	Wood County, West Virginia	35990	515	35990	(X)	23771	573	66	1.3	9321	410	25.9	1.1	18501	510	51.4	1.4	6378	349	17.7	1	1414	277	3.9	0.8	794	187	2.2	0.5	3856	383	10.7	1	2149	259	6	0.7	12219	512	34	1.3	10531	497	29.3	1.3	4463	285	12.4
0500000US54109	54109	Wyoming County, West Virginia	8965	274	8965	(X)	6537	350	72.9	2.8	2312	302	25.8	3	5293	316	59	3	1756	261	19.6	2.7	346	129	3.9	1.4	123	72	1.4	0.8	898	171	10	1.8	433	115	4.8	1.3	2428	249	27.1	2.8	2137	239	23.8	2.7	1049	171	11.7
[truncated: 549 more columns]
