# Supplementary material for: Evaluation of Policy Effectiveness by Mathematical Modeling for the Opioid Crisis with Spatial Study and Trend Analysis
Source: Healthcare (Basel). 2021 May 14;9(5):585. doi: 10.3390/healthcare9050585 (PMC8155830; doi:10.3390/healthcare9050585)
Supplement: Supplementary file 1 [file healthcare-09-00585-s001.zip › Table S4.xlsx]

## Sheet: Table S4
GEO.id	GEO.id2	GEO.display-label	HC01_VC03	HC02_VC03	HC03_VC03	HC04_VC03	HC01_VC04	HC02_VC04	HC03_VC04	HC04_VC04	HC01_VC06	HC02_VC06	HC03_VC06	HC04_VC06	HC01_VC07	HC02_VC07	HC03_VC07	HC04_VC07	HC01_VC08	HC02_VC08	HC03_VC08	HC04_VC08	HC01_VC09	HC02_VC09	HC03_VC09	HC04_VC09	HC01_VC10	HC02_VC10	HC03_VC10	HC04_VC10	HC01_VC11	HC02_VC11	HC03_VC11	HC04_VC11	HC01_VC12	HC02_VC12	HC03_VC12	HC04_VC12	HC01_VC13	HC02_VC13	HC03_VC13	HC04_VC13	HC01_VC14	HC02_VC14	HC03_VC14	HC04_VC14	HC01_VC15	HC02_VC15	HC03_VC15
Id	Id2	Geography	Estimate; HOUSEHOLDS BY TYPE - Total households	Margin of Error; HOUSEHOLDS BY TYPE - Total households	Percent; HOUSEHOLDS BY TYPE - Total households	Percent Margin of Error; HOUSEHOLDS BY TYPE - Total households	Estimate; HOUSEHOLDS BY TYPE - Family households (families)	Margin of Error; HOUSEHOLDS BY TYPE - Family households (families)	Percent; HOUSEHOLDS BY TYPE - Family households (families)	Percent Margin of Error; HOUSEHOLDS BY TYPE - Family households (families)	Estimate; HOUSEHOLDS BY TYPE - Family households (families) - With own children under 18 years	Margin of Error; HOUSEHOLDS BY TYPE - Family households (families) - With own children under 18 years	Percent; HOUSEHOLDS BY TYPE - Family households (families) - With own children under 18 years	Percent Margin of Error; HOUSEHOLDS BY TYPE - Family households (families) - With own children under 18 years	Estimate; HOUSEHOLDS BY TYPE - Family households (families) - Married-couple family	Margin of Error; HOUSEHOLDS BY TYPE - Family households (families) - Married-couple family	Percent; HOUSEHOLDS BY TYPE - Family households (families) - Married-couple family	Percent Margin of Error; HOUSEHOLDS BY TYPE - Family households (families) - Married-couple family	Estimate; HOUSEHOLDS BY TYPE - Family households (families) - Married-couple family - With own children under 18 years	Margin of Error; HOUSEHOLDS BY TYPE - Family households (families) - Married-couple family - With own children under 18 years	Percent; HOUSEHOLDS BY TYPE - Family households (families) - Married-couple family - With own children under 18 years	Percent Margin of Error; HOUSEHOLDS BY TYPE - Family households (families) - Married-couple family - With own children under 18 years	Estimate; HOUSEHOLDS BY TYPE - Family households (families) - Male householder, no wife present, family	Margin of Error; HOUSEHOLDS BY TYPE - Family households (families) - Male householder, no wife present, family	Percent; HOUSEHOLDS BY TYPE - Family households (families) - Male householder, no wife present, family	Percent Margin of Error; HOUSEHOLDS BY TYPE - Family households (families) - Male householder, no wife present, family	Estimate; HOUSEHOLDS BY TYPE - Family households (families) - Male householder, no wife present, family - With own children under 18 years	Margin of Error; HOUSEHOLDS BY TYPE - Family households (families) - Male householder, no wife present, family - With own children under 18 years	Percent; HOUSEHOLDS BY TYPE - Family households (families) - Male householder, no wife present, family - With own children under 18 years	Percent Margin of Error; HOUSEHOLDS BY TYPE - Family households (families) - Male householder, no wife present, family - With own children under 18 years	Estimate; HOUSEHOLDS BY TYPE - Family households (families) - Female householder, no husband present, family	Margin of Error; HOUSEHOLDS BY TYPE - Family households (families) - Female householder, no husband present, family	Percent; HOUSEHOLDS BY TYPE - Family households (families) - Female householder, no husband present, family	Percent Margin of Error; HOUSEHOLDS BY TYPE - Family households (families) - Female householder, no husband present, family	Estimate; HOUSEHOLDS BY TYPE - Family households (families) - Female householder, no husband present, family - With own children under 18 years	Margin of Error; HOUSEHOLDS BY TYPE - Family households (families) - Female householder, no husband present, family - With own children under 18 years	Percent; HOUSEHOLDS BY TYPE - Family households (families) - Female householder, no husband present, family - With own children under 18 years	Percent Margin of Error; HOUSEHOLDS BY TYPE - Family households (families) - Female householder, no husband present, family - With own children under 18 years	Estimate; HOUSEHOLDS BY TYPE - Nonfamily households	Margin of Error; HOUSEHOLDS BY TYPE - Nonfamily households	Percent; HOUSEHOLDS BY TYPE - Nonfamily households	Percent Margin of Error; HOUSEHOLDS BY TYPE - Nonfamily households	Estimate; HOUSEHOLDS BY TYPE - Nonfamily households - Householder living alone	Margin of Error; HOUSEHOLDS BY TYPE - Nonfamily households - Householder living alone	Percent; HOUSEHOLDS BY TYPE - Nonfamily households - Householder living alone	Percent Margin of Error; HOUSEHOLDS BY TYPE - Nonfamily households - Householder living alone	Estimate; HOUSEHOLDS BY TYPE - Nonfamily households - Householder living alone - 65 years and over	Margin of Error; HOUSEHOLDS BY TYPE - Nonfamily households - Householder living alone - 65 years and over	Percent; HOUSEHOLDS BY TYPE - Nonfamily households - Householder living alone - 65 years and over
0500000US21001	21001	Adair County, Kentucky	7236	270	7236	(X)	4837	300	66.8	3.5	1634	201	22.6	2.6	3901	294	53.9	3.7	1166	164	16.1	2.1	338	129	4.7	1.8	133	73	1.8	1	598	158	8.3	2.1	335	135	4.6	1.9	2399	273	33.2	3.5	2205	257	30.5	3.3	970	177	13.4
0500000US21003	21003	Allen County, Kentucky	7980	230	7980	(X)	5550	290	69.5	3.2	2208	208	27.7	2.5	4154	268	52.1	3.3	1510	173	18.9	2.2	394	135	4.9	1.7	171	94	2.1	1.2	1002	181	12.6	2.2	527	158	6.6	1.9	2430	268	30.5	3.2	2175	270	27.3	3.2	854	155	10.7
0500000US21005	21005	Anderson County, Kentucky	8369	210	8369	(X)	5783	238	69.1	2.7	2658	232	31.8	2.7	4499	278	53.8	3.3	1837	219	22	2.6	354	128	4.2	1.5	270	129	3.2	1.5	930	197	11.1	2.3	551	168	6.6	2	2586	252	30.9	2.7	2034	245	24.3	2.8	836	159	10
0500000US21007	21007	Ballard County, Kentucky	3379	140	3379	(X)	2342	158	69.3	3.5	863	109	25.5	2.9	1944	141	57.5	3.6	641	87	19	2.5	149	50	4.4	1.5	97	47	2.9	1.4	249	73	7.4	2.1	125	50	3.7	1.4	1037	123	30.7	3.5	870	116	25.7	3.3	415	69	12.3
0500000US21009	21009	Barren County, Kentucky	16848	358	16848	(X)	11850	418	70.3	2.2	5100	355	30.3	2	9158	444	54.4	2.6	3634	341	21.6	1.9	626	166	3.7	1	284	111	1.7	0.7	2066	273	12.3	1.6	1182	213	7	1.3	4998	409	29.7	2.2	4545	391	27	2.2	2094	208	12.4
0500000US21011	21011	Bath County, Kentucky	4421	194	4421	(X)	2943	211	66.6	3.8	1303	152	29.5	3.3	2236	196	50.6	4.2	814	141	18.4	3.3	144	81	3.3	1.8	78	74	1.8	1.7	563	145	12.7	3.2	411	109	9.3	2.4	1478	183	33.4	3.8	1271	185	28.7	4	493	90	11.2
0500000US21013	21013	Bell County, Kentucky	10881	364	10881	(X)	7603	414	69.9	2.7	2900	287	26.7	2.4	5198	312	47.8	2.5	1737	228	16	2.1	644	174	5.9	1.6	287	126	2.6	1.1	1761	257	16.2	2.2	876	188	8.1	1.7	3278	301	30.1	2.7	3006	309	27.6	2.8	1379	218	12.7
0500000US21015	21015	Boone County, Kentucky	42617	555	42617	(X)	31432	648	73.8	1.4	16102	650	37.8	1.4	25338	658	59.5	1.6	12527	528	29.4	1.2	1969	341	4.6	0.8	1121	213	2.6	0.5	4125	456	9.7	1	2454	375	5.8	0.9	11185	621	26.2	1.4	9136	597	21.4	1.3	2690	274	6.3
0500000US21017	21017	Bourbon County, Kentucky	7971	210	7971	(X)	5511	278	69.1	3.1	2468	187	31	2.3	3994	258	50.1	3.3	1642	185	20.6	2.4	228	94	2.9	1.2	86	58	1.1	0.7	1289	181	16.2	2.1	740	138	9.3	1.7	2460	262	30.9	3.1	2163	255	27.1	3.1	944	161	11.8
0500000US21019	21019	Boyd County, Kentucky	19608	339	19608	(X)	13181	443	67.2	2.1	5029	313	25.6	1.4	9787	412	49.9	2	3351	297	17.1	1.4	980	207	5	1.1	437	153	2.2	0.8	2414	267	12.3	1.4	1241	212	6.3	1.1	6427	438	32.8	2.1	5760	416	29.4	2	2625	283	13.4
0500000US21021	21021	Boyle County, Kentucky	11143	235	11143	(X)	7510	281	67.4	2.2	3213	210	28.8	1.8	5386	297	48.3	2.6	1925	211	17.3	1.9	424	114	3.8	1	230	90	2.1	0.8	1700	219	15.3	1.9	1058	188	9.5	1.7	3633	261	32.6	2.2	3146	265	28.2	2.3	1238	139	11.1
0500000US21023	21023	Bracken County, Kentucky	3231	150	3231	(X)	2128	159	65.9	4.2	885	124	27.4	3.5	1647	149	51	4.4	647	110	20	3.3	129	49	4	1.5	49	29	1.5	0.9	352	75	10.9	2.2	189	59	5.8	1.7	1103	149	34.1	4.2	998	137	30.9	4	529	98	16.4
0500000US21025	21025	Breathitt County, Kentucky	5297	190	5297	(X)	3503	233	66.1	3.6	1201	167	22.7	2.8	2384	202	45	3.7	683	131	12.9	2.4	320	94	6	1.8	91	69	1.7	1.3	799	176	15.1	3.1	427	135	8.1	2.4	1794	195	33.9	3.6	1646	191	31.1	3.6	725	117	13.7
0500000US21027	21027	Breckinridge County, Kentucky	7405	259	7405	(X)	5299	275	71.6	2.8	1820	174	24.6	2	4377	278	59.1	3.2	1441	147	19.5	1.8	313	116	4.2	1.6	174	87	2.3	1.2	609	148	8.2	2	205	70	2.8	0.9	2106	221	28.4	2.8	1788	224	24.1	2.8	836	126	11.3
0500000US21029	21029	Bullitt County, Kentucky	27791	305	27791	(X)	20937	487	75.3	1.5	9219	452	33.2	1.5	16256	514	58.5	1.8	6362	430	22.9	1.5	1455	261	5.2	0.9	816	195	2.9	0.7	3226	366	11.6	1.3	2041	321	7.3	1.1	6854	407	24.7	1.5	5578	448	20.1	1.6	2008	253	7.2
0500000US21031	21031	Butler County, Kentucky	5052	160	5052	(X)	3507	212	69.4	3.8	1423	158	28.2	3	2782	196	55.1	3.8	969	153	19.2	3	237	97	4.7	1.9	132	75	2.6	1.5	488	124	9.7	2.4	322	98	6.4	1.9	1545	205	30.6	3.8	1324	195	26.2	3.6	537	126	10.6
0500000US21033	21033	Caldwell County, Kentucky	5092	270	5092	(X)	3433	256	67.4	3.9	1269	202	24.9	3.7	2501	229	49.1	4.4	751	187	14.7	3.6	204	119	4	2.3	117	93	2.3	1.8	728	187	14.3	3.5	401	139	7.9	2.7	1659	228	32.6	3.9	1514	207	29.7	3.6	629	133	12.4
0500000US21035	21035	Calloway County, Kentucky	14998	467	14998	(X)	8841	347	58.9	2.4	3554	290	23.7	1.8	7397	387	49.3	2.7	2859	272	19.1	1.8	424	121	2.8	0.8	194	64	1.3	0.4	1020	182	6.8	1.2	501	155	3.3	1	6157	468	41.1	2.4	4788	442	31.9	2.6	1846	228	12.3
0500000US21037	21037	Campbell County, Kentucky	35235	588	35235	(X)	22536	611	64	1.6	9566	408	27.1	1.1	16866	603	47.9	1.7	6663	361	18.9	1	1432	222	4.1	0.6	643	149	1.8	0.4	4238	373	12	1	2260	288	6.4	0.8	12699	644	36	1.6	11075	611	31.4	1.5	3663	350	10.4
0500000US21039	21039	Carlisle County, Kentucky	2085	85	2085	(X)	1559	108	74.8	4.6	661	92	31.7	4.1	1225	131	58.8	5.8	486	80	23.3	3.5	116	52	5.6	2.5	55	38	2.6	1.8	218	75	10.5	3.7	120	61	5.8	2.9	526	100	25.2	4.6	472	89	22.6	4	272	61	13
0500000US21041	21041	Carroll County, Kentucky	4268	135	4268	(X)	3023	216	70.8	3.9	1350	155	31.6	3.2	2027	212	47.5	4.5	641	115	15	2.5	460	135	10.8	3.1	304	120	7.1	2.8	536	131	12.6	3	405	122	9.5	2.8	1245	161	29.2	3.9	1041	164	24.4	4	401	100	9.4
0500000US21043	21043	Carter County, Kentucky	10412	334	10412	(X)	7158	341	68.7	2.8	2557	245	24.6	2.2	5930	296	57	2.4	1983	216	19	2	343	102	3.3	1	161	72	1.5	0.7	885	179	8.5	1.7	413	130	4	1.2	3254	329	31.3	2.8	2829	304	27.2	2.7	1276	163	12.3
0500000US21045	21045	Casey County, Kentucky	6162	284	6162	(X)	4229	253	68.6	3.3	1755	218	28.5	3.1	3365	275	54.6	4.3	1235	183	20	2.9	255	118	4.1	1.9	209	106	3.4	1.7	609	137	9.9	2.2	311	119	5	1.9	1933	242	31.4	3.3	1755	229	28.5	3.3	852	168	13.8
0500000US21047	21047	Christian County, Kentucky	26100	483	26100	(X)	18708	523	71.7	1.7	10268	422	39.3	1.4	13489	539	51.7	2	6840	423	26.2	1.6	1010	203	3.9	0.8	458	141	1.8	0.5	4209	356	16.1	1.3	2970	299	11.4	1.1	7392	489	28.3	1.7	6631	439	25.4	1.5	2235	230	8.6
0500000US21049	21049	Clark County, Kentucky	14547	298	14547	(X)	10476	358	72	2.2	4165	262	28.6	1.8	8052	408	55.4	2.8	2907	234	20	1.6	665	187	4.6	1.3	222	106	1.5	0.7	1759	258	12.1	1.7	1036	216	7.1	1.5	4071	341	28	2.2	3517	321	24.2	2.1	1671	201	11.5
0500000US21051	21051	Clay County, Kentucky	6971	261	6971	(X)	4725	348	67.8	3.7	1539	231	22.1	3	3541	323	50.8	3.8	1146	219	16.4	2.9	313	116	4.5	1.7	84	51	1.2	0.7	871	155	12.5	2.2	309	93	4.4	1.3	2246	249	32.2	3.7	2123	251	30.5	3.7	797	147	11.4
0500000US21053	21053	Clinton County, Kentucky	3908	251	3908	(X)	2581	243	66	4.6	1009	179	25.8	3.7	1728	203	44.2	4.9	504	136	12.9	3.2	310	115	7.9	2.8	195	93	5	2.3	543	131	13.9	3.2	310	106	7.9	2.6	1327	202	34	4.6	1266	197	32.4	4.6	690	142	17.7
0500000US21055	21055	Crittenden County, Kentucky	3835	151	3835	(X)	2463	169	64.2	3.8	841	131	21.9	3.3	2041	179	53.2	4.4	665	132	17.3	3.4	173	85	4.5	2.2	57	50	1.5	1.3	249	66	6.5	1.7	119	51	3.1	1.3	1372	159	35.8	3.8	1291	163	33.7	4	603	108	15.7
0500000US21057	21057	Cumberland County, Kentucky	2605	171	2605	(X)	1712	161	65.7	5.1	611	115	23.5	4.1	1261	148	48.4	5.2	356	96	13.7	3.5	113	63	4.3	2.4	19	25	0.7	0.9	338	94	13	3.4	236	68	9.1	2.5	893	152	34.3	5.1	839	147	32.2	5	382	95	14.7
0500000US21059	21059	Daviess County, Kentucky	37582	526	37582	(X)	25329	539	67.4	1.3	10546	433	28.1	1.1	19128	581	50.9	1.6	6938	414	18.5	1.1	1673	255	4.5	0.7	917	216	2.4	0.6	4528	384	12	1	2691	303	7.2	0.8	12253	539	32.6	1.3	10623	476	28.3	1.2	4391	329	11.7
0500000US21061	21061	Edmonson County, Kentucky	4819	209	4819	(X)	3433	245	71.2	4.2	1404	155	29.1	3	2889	258	60	4.7	1074	155	22.3	3.1	131	76	2.7	1.6	54	41	1.1	0.9	413	112	8.6	2.3	276	93	5.7	1.9	1386	215	28.8	4.2	1265	209	26.3	4.1	522	129	10.8
0500000US21063	21063	Elliott County, Kentucky	2508	208	2508	(X)	1747	215	69.7	5.8	645	137	25.7	4.3	1342	179	53.5	5.7	435	121	17.3	4.3	147	76	5.9	2.9	49	45	2	1.8	258	85	10.3	3.1	161	69	6.4	2.6	761	153	30.3	5.8	636	125	25.4	5.1	312	106	12.4
0500000US21065	21065	Estill County, Kentucky	5801	221	5801	(X)	3912	229	67.4	3.5	1658	178	28.6	2.7	2925	260	50.4	4	1081	171	18.6	2.7	172	80	3	1.4	60	46	1	0.8	815	177	14	3.1	517	150	8.9	2.6	1889	228	32.6	3.5	1629	216	28.1	3.3	729	147	12.6
0500000US21067	21067	Fayette County, Kentucky	122793	970	122793	(X)	71218	1129	58	0.9	33927	919	27.6	0.7	50638	1063	41.2	0.9	21597	784	17.6	0.6	5286	480	4.3	0.4	2747	411	2.2	0.3	15294	646	12.5	0.5	9583	591	7.8	0.5	51575	1227	42	0.9	40189	1247	32.7	1	10046	445	8.2
0500000US21069	21069	Fleming County, Kentucky	5468	189	5468	(X)	3790	209	69.3	3.3	1557	163	28.5	2.7	3031	204	55.4	3.8	1191	159	21.8	2.9	249	95	4.6	1.7	97	67	1.8	1.2	510	121	9.3	2.2	269	98	4.9	1.8	1678	197	30.7	3.3	1512	189	27.7	3.2	716	132	13.1
0500000US21071	21071	Floyd County, Kentucky	15602	293	15602	(X)	10833	441	69.4	2.6	3875	356	24.8	2.1	7903	453	50.7	3	2589	357	16.6	2.3	877	198	5.6	1.2	397	152	2.5	1	2053	335	13.2	2.1	889	229	5.7	1.4	4769	420	30.6	2.6	4114	380	26.4	2.4	1309	221	8.4
0500000US21073	21073	Franklin County, Kentucky	20948	409	20948	(X)	12854	484	61.4	2.3	5717	399	27.3	1.9	9112	427	43.5	2	3437	313	16.4	1.4	1029	284	4.9	1.3	693	228	3.3	1.1	2713	362	13	1.7	1587	272	7.6	1.3	8094	531	38.6	2.3	6923	458	33	2	2210	270	10.5
0500000US21075	21075	Fulton County, Kentucky	2961	131	2961	(X)	1988	154	67.1	4.6	890	124	30.1	3.8	1465	146	49.5	4.3	559	116	18.9	3.7	141	73	4.8	2.5	58	48	2	1.6	382	92	12.9	3.2	273	87	9.2	2.9	973	145	32.9	4.6	933	147	31.5	4.6	303	69	10.2
0500000US21077	21077	Gallatin County, Kentucky	3019	185	3019	(X)	2092	160	69.3	4.8	751	109	24.9	3.8	1550	175	51.3	5.5	508	113	16.8	3.7	191	85	6.3	2.9	104	67	3.4	2.3	351	89	11.6	2.8	139	63	4.6	2.1	927	170	30.7	4.8	751	145	24.9	4.2	255	84	8.4
0500000US21079	21079	Garrard County, Kentucky	6239	264	6239	(X)	4723	280	75.7	3.6	1831	197	29.3	2.9	3859	286	61.9	3.8	1441	176	23.1	2.6	262	111	4.2	1.8	106	63	1.7	1	602	143	9.6	2.3	284	92	4.6	1.5	1516	239	24.3	3.6	1347	220	21.6	3.3	645	149	10.3
0500000US21081	21081	Grant County, Kentucky	8674	284	8674	(X)	6868	320	79.2	3	3385	280	39	2.8	5322	345	61.4	3.8	2478	281	28.6	3.1	358	123	4.1	1.4	258	113	3	1.3	1188	226	13.7	2.5	649	178	7.5	2	1806	272	20.8	3	1468	255	16.9	2.8	463	107	5.3
0500000US21083	21083	Graves County, Kentucky	14699	385	14699	(X)	10275	423	69.9	2.4	4246	297	28.9	1.8	8345	428	56.8	2.6	3175	303	21.6	1.9	420	137	2.9	0.9	273	110	1.9	0.7	1510	219	10.3	1.5	798	171	5.4	1.2	4424	391	30.1	2.4	4134	369	28.1	2.3	1795	230	12.2
0500000US21085	21085	Grayson County, Kentucky	9945	293	9945	(X)	6705	331	67.4	2.8	2805	222	28.2	2.1	5524	329	55.5	2.9	2065	222	20.8	2.1	386	123	3.9	1.2	257	104	2.6	1.1	795	177	8	1.8	483	165	4.9	1.7	3240	298	32.6	2.8	2890	269	29.1	2.5	1331	196	13.4
0500000US21087	21087	Green County, Kentucky	4480	169	4480	(X)	3263	187	72.8	3.5	1353	129	30.2	2.6	2557	198	57.1	4.2	944	126	21.1	2.7	132	57	2.9	1.3	85	45	1.9	1	574	152	12.8	3.3	324	113	7.2	2.5	1217	167	27.2	3.5	1131	158	25.2	3.3	618	96	13.8
0500000US21089	21089	Greenup County, Kentucky	14421	255	14421	(X)	10151	341	70.4	2.3	3897	271	27	1.8	7860	313	54.5	2.2	2757	220	19.1	1.5	610	129	4.2	0.9	270	90	1.9	0.6	1681	248	11.7	1.7	870	186	6	1.3	4270	351	29.6	2.3	3981	348	27.6	2.3	1633	175	11.3
0500000US21091	21091	Hancock County, Kentucky	3255	126	3255	(X)	2489	163	76.5	3.6	1060	129	32.6	3.5	1921	136	59	3.9	724	89	22.2	2.5	159	66	4.9	1.9	90	51	2.8	1.5	409	95	12.6	2.8	246	79	7.6	2.4	766	115	23.5	3.6	700	108	21.5	3.3	228	58	7
0500000US21093	21093	Hardin County, Kentucky	38908	569	38908	(X)	28264	626	72.6	1.4	13398	565	34.4	1.4	21220	652	54.5	1.7	8988	504	23.1	1.3	1562	287	4	0.7	950	258	2.4	0.7	5482	455	14.1	1.1	3460	388	8.9	1	10644	583	27.4	1.4	9135	550	23.5	1.3	3035	310	7.8
0500000US21095	21095	Harlan County, Kentucky	11058	332	11058	(X)	7614	404	68.9	2.8	3059	278	27.7	2.2	5253	385	47.5	3	2104	278	19	2.3	765	165	6.9	1.5	256	101	2.3	0.9	1596	263	14.4	2.3	699	167	6.3	1.5	3444	316	31.1	2.8	3097	284	28	2.5	1420	188	12.8
0500000US21097	21097	Harrison County, Kentucky	7243	230	7243	(X)	4691	305	64.8	3.9	2053	225	28.3	3	3528	289	48.7	3.9	1341	189	18.5	2.6	318	137	4.4	1.9	160	100	2.2	1.4	845	193	11.7	2.6	552	180	7.6	2.4	2552	304	35.2	3.9	2112	304	29.2	4.1	808	167	11.2
0500000US21099	21099	Hart County, Kentucky	6957	231	6957	(X)	4967	265	71.4	3.2	2126	178	30.6	2.1	3746	241	53.8	3.2	1376	151	19.8	2	366	117	5.3	1.7	238	110	3.4	1.6	855	157	12.3	2.2	512	127	7.4	1.8	1990	239	28.6	3.2	1772	218	25.5	3	779	125	11.2
0500000US21101	21101	Henderson County, Kentucky	18665	316	18665	(X)	12294	378	65.9	1.9	5010	357	26.8	1.8	9417	413	50.5	2.2	3400	320	18.2	1.7	566	147	3	0.8	255	114	1.4	0.6	2311	289	12.4	1.5	1355	245	7.3	1.3	6371	384	34.1	1.9	5611	397	30.1	2	2285	243	12.2
0500000US21103	21103	Henry County, Kentucky	6018	154	6018	(X)	4258	234	70.8	3.5	1719	170	28.6	2.6	3189	213	53	3.1	1095	140	18.2	2.2	311	104	5.2	1.8	117	57	1.9	0.9	758	125	12.6	2.1	507	116	8.4	1.9	1760	217	29.2	3.5	1452	209	24.1	3.4	698	152	11.6
0500000US21105	21105	Hickman County, Kentucky	1980	105	1980	(X)	1163	117	58.7	5.7	438	76	22.1	3.7	934	128	47.2	6.3	321	81	16.2	3.9	34	26	1.7	1.3	24	20	1.2	1	195	55	9.8	2.7	93	30	4.7	1.5	817	131	41.3	5.7	744	131	37.6	6	418	109	21.1
0500000US21107	21107	Hopkins County, Kentucky	18556	378	18556	(X)	12829	428	69.1	1.9	5422	341	29.2	1.6	9695	452	52.2	2.2	3484	296	18.8	1.5	808	180	4.4	1	528	164	2.8	0.9	2326	271	12.5	1.5	1410	198	7.6	1.1	5727	382	30.9	1.9	5212	364	28.1	1.8	2173	244	11.7
0500000US21109	21109	Jackson County, Kentucky	5739	231	5739	(X)	4011	256	69.9	3.8	1643	234	28.6	3.8	2716	263	47.3	4.5	858	174	15	3	323	124	5.6	2.1	217	109	3.8	1.9	972	186	16.9	3.1	568	174	9.9	2.9	1728	236	30.1	3.8	1518	237	26.5	3.9	580	158	10.1
0500000US21111	21111	Jefferson County, Kentucky	303915	1323	303915	(X)	187491	1487	61.7	0.5	83225	1388	27.4	0.4	128060	1540	42.1	0.5	49004	1187	16.1	0.4	13157	806	4.3	0.3	6699	654	2.2	0.2	46274	1247	15.2	0.4	27522	999	9.1	0.3	116424	1750	38.3	0.5	98704	1794	32.5	0.5	30708	995	10.1
0500000US21113	21113	Jessamine County, Kentucky	17960	328	17960	(X)	13252	448	73.8	2.2	6529	389	36.4	2.1	10302	437	57.4	2.4	4767	379	26.5	2.1	690	223	3.8	1.2	477	193	2.7	1.1	2260	325	12.6	1.8	1285	258	7.2	1.4	4708	413	26.2	2.2	3698	378	20.6	2	1167	211	6.5
0500000US21115	21115	Johnson County, Kentucky	9329	251	9329	(X)	6767	325	72.5	3.1	2724	286	29.2	2.9	5257	338	56.4	3.1	1925	262	20.6	2.6	406	151	4.4	1.7	207	128	2.2	1.4	1104	197	11.8	2.1	592	148	6.3	1.6	2562	300	27.5	3.1	2304	281	24.7	2.9	893	155	9.6
0500000US21117	21117	Kenton County, Kentucky	62260	645	62260	(X)	40265	730	64.7	1.1	18749	615	30.1	1	28993	738	46.6	1.1	12140	511	19.5	0.8	2938	313	4.7	0.5	1549	247	2.5	0.4	8334	557	13.4	0.9	5060	495	8.1	0.8	21995	733	35.3	1.1	18162	745	29.2	1.1	5578	346	9
0500000US21119	21119	Knott County, Kentucky	5855	233	5855	(X)	4074	244	69.6	3.3	1413	173	24.1	2.6	3051	236	52.1	3.6	999	163	17.1	2.6	339	117	5.8	2	94	57	1.6	1	684	122	11.7	2	320	101	5.5	1.7	1781	207	30.4	3.3	1598	193	27.3	3.1	691	140	11.8
0500000US21121	21121	Knox County, Kentucky	12421	329	12421	(X)	8351	429	67.2	2.9	3085	290	24.8	2.3	6084	416	49	3.1	1971	287	15.9	2.3	596	170	4.8	1.4	254	109	2	0.9	1671	292	13.5	2.3	860	234	6.9	1.9	4070	381	32.8	2.9	3744	378	30.1	3	1488	218	12
0500000US21123	21123	Larue County, Kentucky	5269	210	5269	(X)	3701	233	70.2	3.6	1488	190	28.2	3.1	2860	212	54.3	3.5	1083	164	20.6	2.8	237	93	4.5	1.8	87	51	1.7	1	604	125	11.5	2.3	318	107	6	2	1568	200	29.8	3.6	1405	195	26.7	3.6	601	111	11.4
0500000US21125	21125	Laurel County, Kentucky	22490	400	22490	(X)	16344	524	72.7	2	6854	392	30.5	1.6	12335	495	54.8	1.9	4711	407	20.9	1.8	1107	227	4.9	1	609	172	2.7	0.8	2902	334	12.9	1.5	1534	249	6.8	1.1	6146	459	27.3	2	5196	423	23.1	1.9	1869	215	8.3
0500000US21127	21127	Lawrence County, Kentucky	5666	251	5666	(X)	4009	213	70.8	3.1	1558	172	27.5	2.9	3068	252	54.1	4.3	1133	192	20	3.3	205	77	3.6	1.3	65	32	1.1	0.6	736	145	13	2.5	360	116	6.4	2	1657	209	29.2	3.1	1465	184	25.9	2.9	733	135	12.9
0500000US21129	21129	Lee County, Kentucky	2828	167	2828	(X)	1851	183	65.5	5.3	700	134	24.8	4.1	1332	160	47.1	4.8	471	108	16.7	3.5	177	82	6.3	2.9	63	60	2.2	2.1	342	102	12.1	3.6	166	75	5.9	2.6	977	162	34.5	5.3	912	151	32.2	5	283	72	10
0500000US21131	21131	Leslie County, Kentucky	4317	214	4317	(X)	2994	245	69.4	4.3	1224	194	28.4	4	2394	259	55.5	5.4	926	189	21.5	4.1	144	67	3.3	1.5	76	51	1.8	1.2	456	147	10.6	3.3	222	100	5.1	2.3	1323	195	30.6	4.3	1206	213	27.9	4.8	407	123	9.4
0500000US21133	21133	Letcher County, Kentucky	9324	323	9324	(X)	6504	346	69.8	2.9	2178	221	23.4	2	5120	348	54.9	3.3	1678	216	18	2.1	290	127	3.1	1.3	57	40	0.6	0.4	1094	193	11.7	2	443	129	4.8	1.4	2820	294	30.2	2.9	2520	284	27	2.9	1095	181	11.7
0500000US21135	21135	Lewis County, Kentucky	4925	226	4925	(X)	3577	238	72.6	3.8	1310	155	26.6	2.8	2779	262	56.4	4.8	862	144	17.5	2.8	208	89	4.2	1.8	120	68	2.4	1.4	590	133	12	2.6	328	104	6.7	2	1348	203	27.4	3.8	1159	194	23.5	3.7	556	116	11.3
0500000US21137	21137	Lincoln County, Kentucky	9767	252	9767	(X)	6780	362	69.4	3.3	3044	235	31.2	2.2	5090	365	52.1	3.6	2054	255	21	2.5	615	190	6.3	1.9	340	135	3.5	1.4	1075	236	11	2.4	650	194	6.7	2	2987	338	30.6	3.3	2668	336	27.3	3.3	1200	202	12.3
0500000US21139	21139	Livingston County, Kentucky	3553	187	3553	(X)	2611	159	73.5	3.4	828	143	23.3	3.6	2092	158	58.9	4.3	542	126	15.3	3.4	104	53	2.9	1.5	45	32	1.3	0.9	415	115	11.7	3.1	241	94	6.8	2.6	942	141	26.5	3.4	859	136	24.2	3.3	438	100	12.3
0500000US21141	21141	Logan County, Kentucky	10899	298	10899	(X)	7553	358	69.3	2.7	2937	250	26.9	2.2	5577	349	51.2	2.8	1926	219	17.7	1.9	707	194	6.5	1.8	331	134	3	1.2	1269	200	11.6	1.8	680	158	6.2	1.4	3346	307	30.7	2.7	3136	315	28.8	2.8	1347	182	12.4
0500000US21143	21143	Lyon County, Kentucky	3278	222	3278	(X)	2081	189	63.5	4.6	571	117	17.4	3.2	1760	178	53.7	4.5	433	98	13.2	2.7	59	32	1.8	0.9	11	11	0.3	0.3	262	81	8	2.5	127	59	3.9	1.8	1197	183	36.5	4.6	1114	180	34	4.6	352	87	10.7
0500000US21145	21145	McCracken County, Kentucky	27293	545	27293	(X)	17835	498	65.3	1.6	7117	398	26.1	1.4	13625	506	49.9	1.7	4759	377	17.4	1.4	1107	215	4.1	0.8	625	175	2.3	0.6	3103	344	11.4	1.3	1733	279	6.3	1	9458	514	34.7	1.6	8276	486	30.3	1.5	3419	287	12.5
0500000US21147	21147	McCreary County, Kentucky	6287	248	6287	(X)	4402	302	70	4.5	1489	225	23.7	3.3	3387	314	53.9	4.6	1142	204	18.2	3.1	373	150	5.9	2.4	100	68	1.6	1.1	642	166	10.2	2.7	247	93	3.9	1.5	1885	302	30	4.5	1692	290	26.9	4.4	547	147	8.7
0500000US21149	21149	McLean County, Kentucky	3699	132	3699	(X)	2576	163	69.6	4	1078	137	29.1	3.5	1972	150	53.3	4.1	660	108	17.8	2.8	166	70	4.5	1.9	113	70	3.1	1.9	438	104	11.8	2.7	305	88	8.2	2.3	1123	161	30.4	4	1007	143	27.2	3.6	459	83	12.4
0500000US21151	21151	Madison County, Kentucky	31281	561	31281	(X)	20213	583	64.6	1.7	9039	453	28.9	1.2	15107	625	48.3	2	6054	457	19.4	1.4	1280	262	4.1	0.8	760	206	2.4	0.6	3826	434	12.2	1.4	2225	347	7.1	1.1	11068	606	35.4	1.7	8591	558	27.5	1.7	2652	242	8.5
0500000US21153	21153	Magoffin County, Kentucky	4985	199	4985	(X)	3609	246	72.4	3.9	1572	182	31.5	3.3	2743	260	55	4.3	1016	175	20.4	3.3	208	89	4.2	1.8	140	74	2.8	1.5	658	122	13.2	2.5	416	115	8.3	2.3	1376	198	27.6	3.9	1302	205	26.1	4	439	120	8.8
0500000US21155	21155	Marion County, Kentucky	7423	226	7423	(X)	4898	258	66	3	2326	207	31.3	2.5	3689	250	49.7	3.2	1590	180	21.4	2.3	327	103	4.4	1.4	210	88	2.8	1.2	882	147	11.9	1.9	526	138	7.1	1.8	2525	242	34	3	2198	217	29.6	2.8	969	155	13.1
0500000US21157	21157	Marshall County, Kentucky	12272	373	12272	(X)	9008	320	73.4	2.2	3229	264	26.3	2	7365	321	60	2.5	2367	255	19.3	2	453	174	3.7	1.4	221	115	1.8	0.9	1190	225	9.7	1.8	641	185	5.2	1.5	3264	311	26.6	2.2	3036	296	24.7	2.1	1376	190	11.2
0500000US21159	21159	Martin County, Kentucky	4408	311	4408	(X)	3296	329	74.8	4.8	1348	227	30.6	4.3	2404	344	54.5	6.6	760	201	17.2	4.3	243	117	5.5	2.5	178	114	4	2.5	649	184	14.7	4.2	410	157	9.3	3.6	1112	220	25.2	4.8	964	218	21.9	4.8	359	105	8.1
0500000US21161	21161	Mason County, Kentucky	6728	259	6728	(X)	4719	278	70.1	2.9	2005	222	29.8	2.9	3481	246	51.7	3	1242	173	18.5	2.4	307	93	4.6	1.4	134	73	2	1.1	931	143	13.8	2	629	147	9.3	2.1	2009	206	29.9	2.9	1766	187	26.2	2.7	736	116	10.9
0500000US21163	21163	Meade County, Kentucky	10253	255	10253	(X)	7724	338	75.3	2.8	3399	245	33.2	2.2	6129	356	59.8	3.1	2408	217	23.5	2	432	169	4.2	1.6	296	157	2.9	1.5	1163	187	11.3	1.8	695	161	6.8	1.5	2529	302	24.7	2.8	2240	254	21.8	2.4	898	146	8.8
0500000US21165	21165	Menifee County, Kentucky	2352	165	2352	(X)	1499	135	63.7	5.8	604	132	25.7	5.5	1153	126	49	5.4	451	109	19.2	4.6	117	62	5	2.6	56	43	2.4	1.8	229	86	9.7	3.7	97	58	4.1	2.4	853	168	36.3	5.8	782	160	33.2	5.7	278	91	11.8
0500000US21167	21167	Mercer County, Kentucky	8486	217	8486	(X)	5731	295	67.5	3.2	2187	188	25.8	2	4560	263	53.7	2.9	1631	177	19.2	2	252	83	3	1	93	50	1.1	0.6	919	196	10.8	2.3	463	143	5.5	1.7	2755	288	32.5	3.2	2430	275	28.6	3.1	1076	152	12.7
0500000US21169	21169	Metcalfe County, Kentucky	3947	161	3947	(X)	2714	187	68.8	3.6	1022	149	25.9	3.2	2110	201	53.5	4.6	787	131	19.9	3	253	112	6.4	2.8	116	84	2.9	2.1	351	96	8.9	2.5	119	52	3	1.3	1233	148	31.2	3.6	1072	149	27.2	3.7	469	86	11.9
0500000US21171	21171	Monroe County, Kentucky	4441	197	4441	(X)	2826	204	63.6	4.2	1070	126	24.1	2.7	2249	182	50.6	3.9	761	120	17.1	2.6	110	46	2.5	1	60	34	1.4	0.8	467	112	10.5	2.5	249	83	5.6	1.8	1615	214	36.4	4.2	1344	185	30.3	3.9	706	118	15.9
0500000US21173	21173	Montgomery County, Kentucky	10093	272	10093	(X)	7017	305	69.5	2.4	3184	279	31.5	2.4	5099	295	50.5	2.5	1988	260	19.7	2.4	638	181	6.3	1.8	428	153	4.2	1.5	1280	224	12.7	2.2	768	182	7.6	1.7	3076	253	30.5	2.4	2535	235	25.1	2.3	749	130	7.4
0500000US21175	21175	Morgan County, Kentucky	4666	194	4666	(X)	3403	204	72.9	3.5	1309	184	28.1	3.5	2689	219	57.6	4.3	989	186	21.2	3.7	139	65	3	1.4	67	43	1.4	0.9	575	137	12.3	2.9	253	78	5.4	1.6	1263	179	27.1	3.5	1086	166	23.3	3.4	500	107	10.7
0500000US21177	21177	Muhlenberg County, Kentucky	11974	284	11974	(X)	8623	338	72	2.6	3075	262	25.7	2	6788	306	56.7	2.6	2219	236	18.5	1.9	454	163	3.8	1.3	217	114	1.8	0.9	1381	238	11.5	2	639	168	5.3	1.4	3351	329	28	2.6	2916	309	24.4	2.4	1313	194	11
0500000US21179	21179	Nelson County, Kentucky	16548	310	16548	(X)	12177	398	73.6	2.2	5689	311	34.4	1.8	8977	421	54.2	2.6	3689	294	22.3	1.8	1055	242	6.4	1.4	759	218	4.6	1.3	2145	336	13	2	1241	255	7.5	1.5	4371	382	26.4	2.2	3724	373	22.5	2.1	1107	182	6.7
0500000US21181	21181	Nicholas County, Kentucky	2731	155	2731	(X)	1902	140	69.6	4.5	831	115	30.4	4	1440	141	52.7	5.4	573	102	21	3.8	106	53	3.9	1.9	63	44	2.3	1.6	356	104	13	3.6	195	77	7.1	2.7	829	142	30.4	4.5	698	137	25.6	4.5	306	75	11.2
0500000US21183	21183	Ohio County, Kentucky	8719	253	8719	(X)	6266	324	71.9	3.2	2580	230	29.6	2.5	4937	270	56.6	2.7	1680	185	19.3	2	262	87	3	1	168	77	1.9	0.9	1067	222	12.2	2.6	732	215	8.4	2.5	2453	288	28.1	3.2	2193	262	25.2	2.9	998	150	11.4
0500000US21185	21185	Oldham County, Kentucky	19446	285	19446	(X)	15936	352	82	1.6	8092	331	41.6	1.5	13335	365	68.6	1.9	6443	305	33.1	1.5	801	171	4.1	0.9	442	137	2.3	0.7	1800	233	9.3	1.2	1207	204	6.2	1	3510	318	18	1.6	2913	291	15	1.4	1032	145	5.3
0500000US21187	21187	Owen County, Kentucky	4578	201	4578	(X)	2975	245	65	4.7	1326	186	29	3.9	2201	235	48.1	4.8	898	168	19.6	3.6	339	119	7.4	2.6	167	104	3.6	2.3	435	132	9.5	2.8	261	114	5.7	2.5	1603	231	35	4.7	1515	225	33.1	4.6	501	120	10.9
0500000US21189	21189	Owsley County, Kentucky	1642	146	1642	(X)	1135	137	69.1	8.1	400	104	24.4	6.6	904	140	55.1	7.6	264	76	16.1	4.7	46	37	2.8	2.3	20	30	1.2	1.9	185	82	11.3	5.1	116	73	7.1	4.4	507	155	30.9	8.1	503	154	30.6	8	240	97	14.6
0500000US21191	21191	Pendleton County, Kentucky	5477	208	5477	(X)	3839	277	70.1	4	1471	210	26.9	3.5	2953	267	53.9	4.2	1032	178	18.8	3.1	216	91	3.9	1.7	74	52	1.4	0.9	670	151	12.2	2.7	365	104	6.7	1.8	1638	219	29.9	4	1238	189	22.6	3.4	478	105	8.7
0500000US21193	21193	Perry County, Kentucky	11031	345	11031	(X)	7673	442	69.6	3.2	3096	330	28.1	2.8	5350	374	48.5	3	1900	233	17.2	2.1	683	152	6.2	1.4	346	121	3.1	1.1	1640	277	14.9	2.4	850	229	7.7	2	3358	356	30.4	3.2	2769	349	25.1	3.2	1193	180	10.8
0500000US21195	21195	Pike County, Kentucky	26822	460	26822	(X)	18757	519	69.9	1.7	7209	428	26.9	1.5	14183	514	52.9	1.8	5190	374	19.3	1.3	1184	224	4.4	0.8	447	146	1.7	0.5	3390	356	12.6	1.3	1572	264	5.9	1	8065	510	30.1	1.7	7340	517	27.4	1.8	2804	242	10.5
0500000US21197	21197	Powell County, Kentucky	4678	228	4678	(X)	3125	228	66.8	3.8	1495	191	32	3.4	2193	213	46.9	4.2	904	153	19.3	3.1	229	94	4.9	1.9	141	82	3	1.7	703	188	15	4	450	152	9.6	3.2	1553	199	33.2	3.8	1370	197	29.3	3.8	491	118	10.5
0500000US21199	21199	Pulaski County, Kentucky	26375	492	26375	(X)	17928	580	68	1.9	7172	433	27.2	1.5	13917	565	52.8	2.1	4768	363	18.1	1.4	964	209	3.7	0.8	447	143	1.7	0.5	3047	369	11.6	1.3	1957	346	7.4	1.3	8447	539	32	1.9	7166	501	27.2	1.8	3059	284	11.6
0500000US21201	21201	Robertson County, Kentucky	824	88	824	(X)	527	77	64	7.6	242	61	29.4	7.7	402	81	48.8	8.7	177	57	21.5	7.1	36	36	4.4	4.3	20	31	2.4	3.7	89	43	10.8	5.4	45	28	5.5	3.5	297	75	36	7.6	280	72	34	7.4	118	46	14.3
0500000US21203	21203	Rockcastle County, Kentucky	6497	241	6497	(X)	4638	289	71.4	3.1	1993	224	30.7	3	3543	280	54.5	3.4	1619	207	24.9	2.9	196	70	3	1.1	70	45	1.1	0.7	899	157	13.8	2.4	304	103	4.7	1.6	1859	204	28.6	3.1	1715	206	26.4	3.2	859	133	13.2
0500000US21205	21205	Rowan County, Kentucky	8139	349	8139	(X)	5423	300	66.6	3.9	2438	256	30	3.2	3847	309	47.3	3.7	1620	231	19.9	2.8	443	150	5.4	1.8	117	81	1.4	1	1133	216	13.9	2.8	701	184	8.6	2.3	2716	384	33.4	3.9	2171	348	26.7	3.9	769	170	9.4
0500000US21207	21207	Russell County, Kentucky	7364	266	7364	(X)	4725	293	64.2	3.5	1792	215	24.3	2.9	3510	279	47.7	3.4	1175	171	16	2.3	427	157	5.8	2.1	142	79	1.9	1.1	788	144	10.7	2	475	148	6.5	2	2639	289	35.8	3.5	2370	265	32.2	3.4	1085	163	14.7
0500000US21209	21209	Scott County, Kentucky	17676	324	17676	(X)	12939	445	73.2	2	6320	381	35.8	2.1	9584	470	54.2	2.6	4338	362	24.5	2	995	256	5.6	1.4	454	172	2.6	1	2360	350	13.4	1.9	1528	267	8.6	1.5	4737	365	26.8	2	4153	370	23.5	2.1	1165	193	6.6
0500000US21211	21211	Shelby County, Kentucky	15246	375	15246	(X)	11635	416	76.3	2.5	5044	383	33.1	2.3	9044	431	59.3	2.9	3513	327	23	2.1	743	226	4.9	1.5	406	170	2.7	1.1	1848	300	12.1	1.9	1125	270	7.4	1.7	3611	404	23.7	2.5	3100	377	20.3	2.3	1050	194	6.9
0500000US21213	21213	Simpson County, Kentucky	6677	223	6677	(X)	4617	292	69.1	4	1984	232	29.7	3.2	3466	271	51.9	4	1297	200	19.4	2.9	320	143	4.8	2.1	284	143	4.3	2.1	831	188	12.4	2.8	403	134	6	2	2060	284	30.9	4	1820	262	27.3	3.7	764	130	11.4
0500000US21215	21215	Spencer County, Kentucky	6234	176	6234	(X)	5034	218	80.8	3.3	2219	182	35.6	3	4371	227	70.1	3.5	1743	155	28	2.6	220	111	3.5	1.8	145	68	2.3	1.1	443	116	7.1	1.9	331	105	5.3	1.7	1200	220	19.2	3.3	1017	195	16.3	3	423	133	6.8
0500000US21217	21217	Taylor County, Kentucky	9490	356	9490	(X)	6352	330	66.9	2.8	2636	265	27.8	2.4	4794	305	50.5	2.9	1687	254	17.8	2.5	246	85	2.6	0.9	99	58	1	0.6	1312	239	13.8	2.4	850	207	9	2.1	3138	304	33.1	2.8	2728	297	28.7	2.8	1187	183	12.5
0500000US21219	21219	Todd County, Kentucky	4689	200	4689	(X)	3429	200	73.1	3.1	1611	190	34.4	3.5	2528	183	53.9	4	1048	148	22.4	3.2	227	85	4.8	1.8	98	50	2.1	1.1	674	180	14.4	3.6	465	168	9.9	3.4	1260	158	26.9	3.1	1101	136	23.5	2.8	514	82	11
0500000US21221	21221	Trigg County, Kentucky	6034	218	6034	(X)	4418	247	73.2	3.8	1585	183	26.3	2.7	3507	257	58.1	4.2	1043	172	17.3	2.8	277	112	4.6	1.9	136	79	2.3	1.3	634	177	10.5	2.9	406	142	6.7	2.3	1616	253	26.8	3.8	1490	234	24.7	3.6	524	130	8.7
0500000US21223	21223	Trimble County, Kentucky	3464	119	3464	(X)	2584	142	74.6	3.9	1044	153	30.1	4.5	2200	160	63.5	4.3	856	150	24.7	4.4	127	56	3.7	1.6	65	47	1.9	1.4	257	87	7.4	2.5	123	71	3.6	2.1	880	144	25.4	3.9	771	137	22.3	3.7	289	72	8.3
0500000US21225	21225	Union County, Kentucky	5410	264	5410	(X)	3822	257	70.6	3.4	1666	196	30.8	3	2675	232	49.4	4.3	1044	136	19.3	2.4	295	141	5.5	2.5	157	99	2.9	1.8	852	165	15.7	2.9	465	137	8.6	2.4	1588	203	29.4	3.4	1446	180	26.7	3	764	117	14.1
0500000US21227	21227	Warren County, Kentucky	43801	519	43801	(X)	27287	597	62.3	1.3	12445	513	28.4	1.1	20073	645	45.8	1.5	8488	455	19.4	1	1706	309	3.9	0.7	759	199	1.7	0.5	5508	531	12.6	1.2	3198	401	7.3	0.9	16514	622	37.7	1.3	13000	632	29.7	1.4	3683	303	8.4
0500000US21229	21229	Washington County, Kentucky	4541	143	4541	(X)	3335	184	73.4	3.6	1528	133	33.6	2.9	2655	195	58.5	4.1	1118	148	24.6	3.2	218	83	4.8	1.8	131	65	2.9	1.4	462	101	10.2	2.2	279	82	6.1	1.8	1206	173	26.6	3.6	1087	160	23.9	3.3	405	72	8.9
0500000US21231	21231	Wayne County, Kentucky	8296	299	8296	(X)	5854	322	70.6	3.3	2236	230	27	2.4	4413	334	53.2	4	1505	215	18.1	2.5	326	137	3.9	1.6	171	91	2.1	1.1	1115	214	13.4	2.5	560	168	6.8	2	2442	297	29.4	3.3	2212	289	26.7	3.2	927	212	11.2
0500000US21233	21233	Webster County, Kentucky	4995	181	4995	(X)	3512	222	70.3	3.9	1212	152	24.3	2.9	2845	209	57	4.1	910	115	18.2	2.3	248	64	5	1.2	112	50	2.2	1	419	107	8.4	2.1	190	77	3.8	1.5	1483	208	29.7	3.9	1297	184	26	3.4	618	105	12.4
0500000US21235	21235	Whitley County, Kentucky	13330	399	13330	(X)	9411	391	70.6	2.4	4066	249	30.5	1.9	6554	438	49.2	2.8	2645	282	19.8	2	1035	237	7.8	1.8	527	184	4	1.4	1822	256	13.7	1.9	894	194	6.7	1.5	3919	358	29.4	2.4	3354	317	25.2	2.2	1402	224	10.5
0500000US21237	21237	Wolfe County, Kentucky	2686	198	2686	(X)	1713	201	63.8	5.7	637	135	23.7	4.5	1248	182	46.5	6.2	411	110	15.3	3.9	64	41	2.4	1.5	25	31	0.9	1.1	401	127	14.9	4.4	201	94	7.5	3.4	973	168	36.2	5.7	830	162	30.9	5.8	293	90	10.9
0500000US21239	21239	Woodford County, Kentucky	9847	251	9847	(X)	6638	324	67.4	2.9	2834	267	28.8	2.5	5169	304	52.5	2.9	2045	256	20.8	2.5	545	156	5.5	1.6	226	118	2.3	1.2	924	177	9.4	1.8	563	151	5.7	1.5	3209	299	32.6	2.9	2698	277	27.4	2.7	928	150	9.4
0500000US39001	39001	Adams County, Ohio	10923	270	10923	(X)	7743	319	70.9	2.2	3446	245	31.5	1.9	5874	312	53.8	2.6	2282	225	20.9	1.9	547	146	5	1.3	319	115	2.9	1	1322	161	12.1	1.4	845	162	7.7	1.4	3180	255	29.1	2.2	2753	236	25.2	2.1	1373	177	12.6
0500000US39003	39003	Allen County, Ohio	40622	452	40622	(X)	27393	517	67.4	1.2	12112	457	29.8	1.1	19452	571	47.9	1.4	7030	396	17.3	1	1925	244	4.7	0.6	1121	212	2.8	0.5	6016	423	14.8	1	3961	334	9.8	0.8	13229	547	32.6	1.2	11495	485	28.3	1.1	4469	305	11
0500000US39005	39005	Ashland County, Ohio	20266	335	20266	(X)	14426	443	71.2	2	5524	302	27.3	1.4	11936	462	58.9	2.1	4092	265	20.2	1.3	698	190	3.4	0.9	314	135	1.5	0.7	1792	254	8.8	1.2	1118	202	5.5	1	5840	433	28.8	2	4937	399	24.4	1.9	2192	213	10.8
0500000US39007	39007	Ashtabula County, Ohio	38889	556	38889	(X)	26091	531	67.1	1.4	10884	539	28	1.4	19456	461	50	1.3	6957	403	17.9	1.1	2075	330	5.3	0.9	1298	239	3.3	0.6	4560	380	11.7	1	2629	337	6.8	0.9	12798	633	32.9	1.4	10671	505	27.4	1.1	4509	310	11.6
0500000US39009	39009	Athens County, Ohio	22221	562	22221	(X)	12256	485	55.2	1.8	4990	330	22.5	1.4	9324	489	42	2.1	3334	293	15	1.3	889	194	4	0.9	402	129	1.8	0.6	2043	288	9.2	1.3	1254	232	5.6	1	9965	482	44.8	1.8	6605	417	29.7	1.9	1952	223	8.8
0500000US39011	39011	Auglaize County, Ohio	18342	277	18342	(X)	12908	301	70.4	1.6	5291	281	28.8	1.4	10745	332	58.6	2	4049	256	22.1	1.4	697	151	3.8	0.8	402	127	2.2	0.7	1466	196	8	1	840	171	4.6	0.9	5434	337	29.6	1.6	4720	343	25.7	1.7	2142	218	11.7
0500000US39013	39013	Belmont County, Ohio	28716	375	28716	(X)	19103	448	66.5	1.5	6855	333	23.9	1	14966	379	52.1	1.5	4647	311	16.2	1.1	1331	195	4.6	0.7	715	157	2.5	0.5	2806	275	9.8	0.9	1493	230	5.2	0.8	9613	474	33.5	1.5	8544	466	29.8	1.5	3739	297	13
0500000US39015	39015	Brown County, Ohio	16289	324	16289	(X)	11987	374	73.6	1.9	4818	340	29.6	1.9	9568	428	58.7	2.4	3517	303	21.6	1.7	511	141	3.1	0.9	264	98	1.6	0.6	1908	273	11.7	1.7	1037	200	6.4	1.2	4302	323	26.4	1.9	3698	305	22.7	1.8	1513	226	9.3
0500000US39017	39017	Butler County, Ohio	134945	1065	134945	(X)	94256	1168	69.8	0.7	42739	1039	31.7	0.7	71778	1144	53.2	0.8	29608	908	21.9	0.7	6146	532	4.6	0.4	3004	401	2.2	0.3	16332	797	12.1	0.6	10127	648	7.5	0.5	40689	1090	30.2	0.7	32853	1012	24.3	0.7	11180	639	8.3
0500000US39019	39019	Carroll County, Ohio	11424	288	11424	(X)	7930	320	69.4	2.6	3044	177	26.6	1.5	6639	342	58.1	2.9	2314	191	20.3	1.7	492	125	4.3	1.1	251	99	2.2	0.9	799	179	7	1.5	479	127	4.2	1.1	3494	332	30.6	2.6	2888	313	25.3	2.6	1285	179	11.2
0500000US39021	39021	Champaign County, Ohio	15240	255	15240	(X)	11049	354	72.5	2.3	4926	299	32.3	1.9	8686	319	57	2.1	3424	251	22.5	1.6	601	151	3.9	1	388	119	2.5	0.8	1762	204	11.6	1.3	1114	174	7.3	1.1	4191	372	27.5	2.3	3669	325	24.1	2	1523	184	10
0500000US39023	39023	Clark County, Ohio	54959	607	54959	(X)	36004	652	65.5	1	15163	515	27.6	0.9	26290	659	47.8	1.2	9357	550	17	1	2248	307	4.1	0.6	1156	214	2.1	0.4	7466	461	13.6	0.8	4650	348	8.5	0.6	18955	630	34.5	1	15735	549	28.6	0.9	6728	371	12.2
0500000US39025	39025	Clermont County, Ohio	73859	715	73859	(X)	53337	811	72.2	1	24038	688	32.5	0.9	41648	807	56.4	1.1	17109	628	23.2	0.8	4256	473	5.8	0.6	2370	340	3.2	0.5	7433	565	10.1	0.8	4559	468	6.2	0.6	20522	800	27.8	1	16831	706	22.8	0.9	6272	433	8.5
0500000US39027	39027	Clinton County, Ohio	16018	321	16018	(X)	11267	400	70.3	2.1	5085	347	31.7	2	8331	385	52	2.3	3127	272	19.5	1.6	1120	246	7	1.5	689	187	4.3	1.2	1816	273	11.3	1.6	1269	229	7.9	1.4	4751	360	29.7	2.1	4093	348	25.6	2.1	1867	177	11.7
0500000US39029	39029	Columbiana County, Ohio	42476	490	42476	(X)	28900	661	68	1.4	11363	585	26.8	1.3	22571	654	53.1	1.5	7814	483	18.4	1.1	1803	307	4.2	0.7	1000	236	2.4	0.5	4526	384	10.7	0.9	2549	279	6	0.6	13576	635	32	1.4	11305	603	26.6	1.3	4661	401	11
0500000US39031	39031	Coshocton County, Ohio	14516	343	14516	(X)	10132	367	69.8	2.4	3853	259	26.5	1.8	7919	367	54.6	2.6	2726	224	18.8	1.6	616	148	4.2	1	303	101	2.1	0.7	1597	246	11	1.6	824	172	5.7	1.2	4384	383	30.2	2.4	3771	358	26	2.2	1648	173	11.4
0500000US39033	39033	Crawford County, Ohio	17664	371	17664	(X)	12067	344	68.3	1.8	4727	264	26.8	1.4	9405	375	53.2	2.1	3114	289	17.6	1.6	731	159	4.1	0.9	472	149	2.7	0.8	1931	257	10.9	1.4	1141	216	6.5	1.2	5597	378	31.7	1.8	4811	347	27.2	1.8	2244	184	12.7
0500000US39035	39035	Cuyahoga County, Ohio	534899	2314	534899	(X)	312525	2100	58.4	0.3	136748	1787	25.6	0.3	204680	2237	38.3	0.4	78065	1634	14.6	0.3	22042	913	4.1	0.2	9603	611	1.8	0.1	85803	1496	16	0.3	49080	1243	9.2	0.2	222374	2081	41.6	0.3	194382	2135	36.3	0.3	68120	1359	12.7
0500000US39037	39037	Darke County, Ohio	20856	296	20856	(X)	14374	411	68.9	1.6	5685	294	27.3	1.3	11970	405	57.4	1.6	4329	251	20.8	1.1	682	163	3.3	0.8	343	111	1.6	0.5	1722	189	8.3	0.9	1013	172	4.9	0.8	6482	326	31.1	1.6	5618	357	26.9	1.7	2394	210	11.5
0500000US39039	39039	Defiance County, Ohio	15302	294	15302	(X)	10985	283	71.8	1.9	4349	237	28.4	1.5	8381	285	54.8	1.9	2840	224	18.6	1.4	805	197	5.3	1.3	345	129	2.3	0.8	1799	237	11.8	1.5	1164	188	7.6	1.2	4317	326	28.2	1.9	3640	321	23.8	1.9	1265	158	8.3
0500000US39041	39041	Delaware County, Ohio	63376	476	63376	(X)	48879	723	77.1	1.1	26333	549	41.6	0.8	42039	655	66.3	1.1	21705	484	34.2	0.7	1995	329	3.1	0.5	1313	259	2.1	0.4	4845	438	7.6	0.7	3315	369	5.2	0.6	14497	725	22.9	1.1	12005	718	18.9	1.1	3663	294	5.8
0500000US39043	39043	Erie County, Ohio	31712	479	31712	(X)	21025	534	66.3	1.2	7984	451	25.2	1.3	16189	510	51.1	1.3	5381	385	17	1.1	1450	241	4.6	0.8	745	181	2.3	0.6	3386	305	10.7	0.9	1858	231	5.9	0.7	10687	408	33.7	1.2	9376	399	29.6	1.2	3717	302	11.7
0500000US39045	39045	Fairfield County, Ohio	54302	600	54302	(X)	39942	721	73.6	1.1	18720	551	34.5	0.9	31304	685	57.6	1.1	13528	508	24.9	0.9	2379	271	4.4	0.5	1198	200	2.2	0.4	6259	487	11.5	0.9	3994	365	7.4	0.7	14360	626	26.4	1.1	11839	538	21.8	1	4392	335	8.1
0500000US39047	39047	Fayette County, Ohio	11474	252	11474	(X)	7510	286	65.5	2.2	3121	224	27.2	1.8	5486	264	47.8	2.3	1819	192	15.9	1.7	589	137	5.1	1.2	371	114	3.2	1	1435	207	12.5	1.8	931	173	8.1	1.5	3964	278	34.5	2.2	3258	249	28.4	2.1	1333	153	11.6
0500000US39049	39049	Franklin County, Ohio	464018	2256	464018	(X)	272081	2267	58.6	0.5	132995	2007	28.7	0.4	187701	1992	40.5	0.4	82678	1725	17.8	0.4	19343	946	4.2	0.2	9672	733	2.1	0.2	65037	1469	14	0.3	40645	1343	8.8	0.3	191937	2477	41.4	0.5	151670	2096	32.7	0.4	36728	1163	7.9
0500000US39051	39051	Fulton County, Ohio	16358	233	16358	(X)	12274	351	75	1.8	5160	288	31.5	1.6	10076	339	61.6	1.9	3832	246	23.4	1.4	791	169	4.8	1	457	134	2.8	0.8	1407	212	8.6	1.3	871	216	5.3	1.3	4084	297	25	1.8	3639	287	22.2	1.7	1548	166	9.5
0500000US39053	39053	Gallia County, Ohio	11885	369	11885	(X)	8280	397	69.7	2.7	3312	293	27.9	2.1	6490	301	54.6	2.6	2430	258	20.4	2.1	517	145	4.4	1.2	280	116	2.4	1	1273	252	10.7	2	602	176	5.1	1.4	3605	351	30.3	2.7	3148	359	26.5	2.9	1491	212	12.5
0500000US39055	39055	Geauga County, Ohio	34624	300	34624	(X)	25931	478	74.9	1.4	10880	415	31.4	1.1	21914	447	63.3	1.3	8973	425	25.9	1.2	1154	232	3.3	0.7	484	149	1.4	0.4	2863	317	8.3	0.9	1423	255	4.1	0.7	8693	494	25.1	1.4	7393	479	21.4	1.4	3070	277	8.9
0500000US39057	39057	Greene County, Ohio	62681	610	62681	(X)	42121	870	67.2	1.3	17152	629	27.4	1	33462	706	53.4	1	12362	560	19.7	0.9	2136	348	3.4	0.6	1019	222	1.6	0.4	6523	507	10.4	0.8	3771	425	6	0.7	20560	830	32.8	1.3	17103	839	27.3	1.3	5600	389	8.9
0500000US39059	39059	Guernsey County, Ohio	15808	293	15808	(X)	10641	286	67.3	1.8	4357	232	27.6	1.3	8331	340	52.7	2.3	2957	244	18.7	1.5	684	159	4.3	1	385	125	2.4	0.8	1626	232	10.3	1.4	1015	183	6.4	1.1	5167	323	32.7	1.8	4506	312	28.5	1.8	2118	192	13.4
0500000US39061	39061	Hamilton County, Ohio	326023	1874	326023	(X)	194784	2003	59.7	0.5	87861	1599	26.9	0.4	133106	1660	40.8	0.5	51572	1271	15.8	0.4	12769	767	3.9	0.2	6584	611	2	0.2	48909	1177	15	0.3	29705	985	9.1	0.3	131239	1718	40.3	0.5	111133	1813	34.1	0.5	34960	972	10.7
0500000US39063	39063	Hancock County, Ohio	30342	431	30342	(X)	20365	556	67.1	1.8	8723	382	28.7	1.2	15538	532	51.2	1.7	5642	334	18.6	1	1354	257	4.5	0.8	1002	222	3.3	0.7	3473	382	11.4	1.3	2079	308	6.9	1	9977	604	32.9	1.8	8530	589	28.1	1.8	3120	297	10.3
0500000US39065	39065	Hardin County, Ohio	11822	281	11822	(X)	7832	271	66.2	2.4	3560	262	30.1	2.2	5999	283	50.7	2.6	2436	247	20.6	2.1	604	154	5.1	1.3	332	107	2.8	0.9	1229	184	10.4	1.6	792	168	6.7	1.4	3990	327	33.8	2.4	3385	291	28.6	2.2	1245	183	10.5
0500000US39067	39067	Harrison County, Ohio	6324	234	6324	(X)	4190	216	66.3	2.7	1731	163	27.4	2.1	3390	196	53.6	2.8	1242	128	19.6	1.8	266	83	4.2	1.3	166	75	2.6	1.2	534	105	8.4	1.6	323	88	5.1	1.3	2134	199	33.7	2.7	1825	187	28.9	2.7	837	125	13.2
0500000US39069	39069	Henry County, Ohio	11151	208	11151	(X)	7829	246	70.2	2.2	3374	200	30.3	1.7	6382	279	57.2	2.5	2438	193	21.9	1.7	448	82	4	0.7	279	81	2.5	0.7	999	155	9	1.4	657	145	5.9	1.3	3322	264	29.8	2.2	2743	277	24.6	2.3	1255	157	11.3
0500000US39071	39071	Highland County, Ohio	16969	329	16969	(X)	12199	358	71.9	1.7	5297	253	31.2	1.3	9080	372	53.5	2	3415	283	20.1	1.6	1015	195	6	1.2	610	185	3.6	1.1	2104	300	12.4	1.7	1272	232	7.5	1.4	4770	308	28.1	1.7	4096	297	24.1	1.7	1865	177	11
0500000US39073	39073	Hocking County, Ohio	11562	287	11562	(X)	8192	275	70.9	2.5	3465	187	30	1.5	6384	290	55.2	2.5	2352	198	20.3	1.6	500	128	4.3	1.1	225	87	1.9	0.8	1308	197	11.3	1.7	888	165	7.7	1.4	3370	328	29.1	2.5	2951	320	25.5	2.5	1224	172	10.6
0500000US39075	39075	Holmes County, Ohio	12183	281	12183	(X)	9580	339	78.6	2.4	4875	254	40	2	8578	315	70.4	2.4	4421	225	36.3	1.9	301	134	2.5	1.1	75	44	0.6	0.4	701	133	5.8	1.1	379	106	3.1	0.8	2603	308	21.4	2.4	2292	295	18.8	2.3	935	185	7.7
0500000US39077	39077	Huron County, Ohio	22673	379	22673	(X)	16389	455	72.3	1.6	7436	374	32.8	1.5	12732	401	56.2	1.6	4825	306	21.3	1.3	982	213	4.3	0.9	681	174	3	0.8	2675	300	11.8	1.3	1930	282	8.5	1.2	6284	384	27.7	1.6	5099	327	22.5	1.4	2269	200	10
0500000US39079	39079	Jackson County, Ohio	13411	291	13411	(X)	9183	345	68.5	2.4	4156	241	31	1.7	6434	338	48	2.4	2526	233	18.8	1.7	866	195	6.5	1.4	496	150	3.7	1.1	1883	242	14	1.8	1134	183	8.5	1.4	4228	347	31.5	2.4	3636	343	27.1	2.4	1515	199	11.3
0500000US39081	39081	Jefferson County, Ohio	28608	378	28608	(X)	18622	439	65.1	1.4	6750	354	23.6	1.1	14138	486	49.4	1.7	4506	307	15.8	1	1208	179	4.2	0.6	336	111	1.2	0.4	3276	311	11.5	1.1	1908	229	6.7	0.8	9986	450	34.9	1.4	8707	425	30.4	1.4	4120	257	14.4
0500000US39083	39083	Knox County, Ohio	22483	345	22483	(X)	15710	407	69.9	1.7	6755	381	30	1.6	12823	388	57	1.7	4914	309	21.9	1.4	843	169	3.7	0.8	504	140	2.2	0.6	2044	310	9.1	1.3	1337	279	5.9	1.2	6773	419	30.1	1.7	5713	399	25.4	1.6	2369	238	10.5
0500000US39085	39085	Lake County, Ohio	94389	661	94389	(X)	61731	842	65.4	0.9	25766	700	27.3	0.7	47954	981	50.8	1.1	18349	624	19.4	0.7	3585	422	3.8	0.4	1863	291	2	0.3	10192	717	10.8	0.8	5554	553	5.9	0.6	32658	952	34.6	0.9	27544	854	29.2	0.8	10572	465	11.2
0500000US39087	39087	Lawrence County, Ohio	23990	422	23990	(X)	16590	515	69.2	1.8	6324	385	26.4	1.4	12026	525	50.1	2	4091	326	17.1	1.3	1355	239	5.6	1	689	150	2.9	0.6	3209	349	13.4	1.4	1544	280	6.4	1.1	7400	449	30.8	1.8	6510	446	27.1	1.8	2983	305	12.4
0500000US39089	39089	Licking County, Ohio	63781	607	63781	(X)	44954	658	70.5	1.1	19725	592	30.9	0.9	35132	704	55.1	1.1	13430	531	21.1	0.8	3029	380	4.7	0.6	1956	351	3.1	0.5	6793	518	10.7	0.8	4339	388	6.8	0.6	18827	752	29.5	1.1	15701	733	24.6	1.1	6165	394	9.7
0500000US39091	39091	Logan County, Ohio	18050	334	18050	(X)	12420	388	68.8	2.1	5155	299	28.6	1.5	9445	398	52.3	2.3	3285	326	18.2	1.8	1020	188	5.7	1	567	148	3.1	0.8	1955	224	10.8	1.2	1303	189	7.2	1	5630	414	31.2	2.1	4627	384	25.6	2	1874	212	10.4
0500000US39093	39093	Lorain County, Ohio	116391	862	116391	(X)	80177	1002	68.9	0.8	34059	814	29.3	0.7	59221	1067	50.9	0.9	22338	765	19.2	0.6	5151	442	4.4	0.4	2401	350	2.1	0.3	15805	747	13.6	0.6	9320	567	8	0.5	36214	952	31.1	0.8	30661	894	26.3	0.7	11318	535	9.7
0500000US39095	39095	Lucas County, Ohio	178615	1084	178615	(X)	109395	1067	61.2	0.6	49553	984	27.7	0.5	72309	1063	40.5	0.6	27762	801	15.5	0.5	8522	608	4.8	0.3	4341	450	2.4	0.3	28564	858	16	0.5	17450	767	9.8	0.4	69220	1351	38.8	0.6	57700	1290	32.3	0.6	18695	735	10.5
0500000US39097	39097	Madison County, Ohio	14779	288	14779	(X)	10443	339	70.7	2	4571	252	30.9	1.7	8467	371	57.3	2.2	3500	218	23.7	1.5	615	164	4.2	1.1	351	130	2.4	0.9	1361	199	9.2	1.4	720	156	4.9	1.1	4336	310	29.3	2	3703	279	25.1	1.8	1431	203	9.7
0500000US39099	39099	Mahoning County, Ohio	98460	881	98460	(X)	62114	882	63.1	0.8	24259	754	24.6	0.7	43384	938	44.1	1	14636	594	14.9	0.6	4220	358	4.3	0.4	1853	271	1.9	0.3	14510	695	14.7	0.7	7770	451	7.9	0.4	36346	926	36.9	0.8	32074	825	32.6	0.8	13469	519	13.7
0500000US39101	39101	Marion County, Ohio	24736	531	24736	(X)	17045	531	68.9	1.7	7169	397	29	1.4	12406	493	50.2	2	4179	355	16.9	1.4	1441	234	5.8	0.9	865	204	3.5	0.8	3198	342	12.9	1.3	2125	270	8.6	1.1	7691	457	31.1	1.7	6476	423	26.2	1.6	3133	251	12.7
0500000US39103	39103	Medina County, Ohio	65272	600	65272	(X)	48076	674	73.7	0.9	21614	596	33.1	0.8	40005	664	61.3	1	17107	559	26.2	0.8	2463	366	3.8	0.6	1269	269	1.9	0.4	5608	477	8.6	0.7	3238	372	5	0.6	17196	666	26.3	0.9	14422	540	22.1	0.8	5725	361	8.8
0500000US39105	39105	Meigs County, Ohio	9598	244	9598	(X)	6448	270	67.2	2.7	2333	179	24.3	1.7	4992	267	52	2.8	1630	183	17	1.8	408	103	4.3	1.1	156	69	1.6	0.7	1048	161	10.9	1.7	547	129	5.7	1.3	3150	286	32.8	2.7	2593	272	27	2.6	1015	134	10.6
0500000US39107	39107	Mercer County, Ohio	15715	278	15715	(X)	11333	315	72.1	1.8	4811	253	30.6	1.4	9530	320	60.6	1.8	3782	246	24.1	1.4	697	130	4.4	0.8	377	112	2.4	0.7	1106	189	7	1.2	652	148	4.1	0.9	4382	306	27.9	1.8	3861	296	24.6	1.8	1853	215	11.8
0500000US39109	39109	Miami County, Ohio	41225	436	41225	(X)	28062	479	68.1	1.3	11868	441	28.8	1.1	21855	519	53	1.3	7930	424	19.2	1	1744	263	4.2	0.6	1146	222	2.8	0.5	4463	353	10.8	0.9	2792	330	6.8	0.8	13163	586	31.9	1.3	10985	535	26.6	1.2	4341	285	10.5
0500000US39111	39111	Monroe County, Ohio	6071	218	6071	(X)	4101	199	67.6	3.1	1563	145	25.7	2.2	3301	197	54.4	3.3	1119	126	18.4	2	300	89	4.9	1.4	181	73	3	1.2	500	94	8.2	1.5	263	76	4.3	1.2	1970	219	32.4	3.1	1740	217	28.7	3.1	874	109	14.4
0500000US39113	39113	Montgomery County, Ohio	222892	1133	222892	(X)	135893	1299	61	0.6	58976	1109	26.5	0.5	93064	1269	41.8	0.5	33916	1010	15.2	0.4	10079	648	4.5	0.3	5778	546	2.6	0.2	32750	1035	14.7	0.5	19282	788	8.7	0.4	86999	1447	39	0.6	74848	1322	33.6	0.5	26478	1011	11.9
0500000US39115	39115	Morgan County, Ohio	6271	229	6271	(X)	4540	238	72.4	2.7	1720	174	27.4	2.3	3542	230	56.5	3.1	1173	186	18.7	2.8	338	111	5.4	1.8	176	78	2.8	1.2	660	126	10.5	2	371	103	5.9	1.6	1731	181	27.6	2.7	1480	174	23.6	2.6	696	113	11.1
0500000US39117	39117	Morrow County, Ohio	13035	276	13035	(X)	9827	363	75.4	2.4	4157	301	31.9	2.2	7741	389	59.4	2.9	2929	323	22.5	2.5	749	227	5.7	1.7	416	177	3.2	1.4	1337	215	10.3	1.6	812	167	6.2	1.3	3208	330	24.6	2.4	2700	271	20.7	2	1188	204	9.1
0500000US39119	39119	Muskingum County, Ohio	33986	488	33986	(X)	23016	590	67.7	1.5	9896	412	29.1	1.1	16929	510	49.8	1.4	6165	347	18.1	1	1584	231	4.7	0.7	880	191	2.6	0.6	4503	412	13.2	1.2	2851	293	8.4	0.8	10970	557	32.3	1.5	9071	489	26.7	1.4	3930	343	11.6
0500000US39121	39121	Noble County, Ohio	4804	244	4804	(X)	3359	262	69.9	4.3	745	184	15.5	3.5	2830	239	58.9	4.5	536	158	11.2	3.1	164	69	3.4	1.4	63	41	1.3	0.8	365	125	7.6	2.6	146	76	3	1.6	1445	226	30.1	4.3	1346	216	28	4.2	789	171	16.4
0500000US39123	39123	Ottawa County, Ohio	17688	360	17688	(X)	12440	405	70.3	2	4131	267	23.4	1.3	10172	364	57.5	2	3054	217	17.3	1.1	811	193	4.6	1.1	386	115	2.2	0.6	1457	212	8.2	1.2	691	137	3.9	0.8	5248	375	29.7	2	4588	341	25.9	1.8	2097	194	11.9
0500000US39125	39125	Paulding County, Ohio	7700	218	7700	(X)	5368	212	69.7	2.4	2216	184	28.8	2.2	4286	218	55.7	2.8	1607	155	20.9	2	392	97	5.1	1.2	223	84	2.9	1.1	690	114	9	1.5	386	99	5	1.3	2332	210	30.3	2.4	2002	183	26	2.1	998	108	13
0500000US39127	39127	Perry County, Ohio	13688	225	13688	(X)	9801	348	71.6	2.3	4377	239	32	1.7	7658	355	55.9	2.5	3019	257	22.1	1.9	612	139	4.5	1	360	124	2.6	0.9	1531	201	11.2	1.4	998	185	7.3	1.3	3887	320	28.4	2.3	3226	288	23.6	2.1	1294	172	9.5
0500000US39129	39129	Pickaway County, Ohio	19196	367	19196	(X)	14082	330	73.4	1.7	6363	336	33.1	1.6	11044	313	57.5	1.8	4428	327	23.1	1.6	849	168	4.4	0.9	610	158	3.2	0.8	2189	263	11.4	1.3	1325	221	6.9	1.1	5114	376	26.6	1.7	4375	345	22.8	1.6	1984	257	10.3
0500000US39131	39131	Pike County, Ohio	10730	328	10730	(X)	7602	334	70.8	2.3	3099	286	28.9	2.4	5375	326	50.1	2.7	1899	221	17.7	1.9	546	137	5.1	1.3	350	125	3.3	1.2	1681	241	15.7	2.2	850	198	7.9	1.8	3128	269	29.2	2.3	2727	258	25.4	2.2	1238	161	11.5
0500000US39133	39133	Portage County, Ohio	61016	712	61016	(X)	40409	676	66.2	1	16546	597	27.1	1	30840	679	50.5	1	11204	498	18.4	0.8	2388	325	3.9	0.5	1035	192	1.7	0.3	7181	453	11.8	0.8	4307	390	7.1	0.6	20607	679	33.8	1	15982	687	26.2	1	4725	368	7.7
0500000US39135	39135	Preble County, Ohio	16396	266	16396	(X)	11683	355	71.3	2	4715	294	28.8	1.8	9193	304	56.1	1.8	3481	242	21.2	1.5	638	156	3.9	1	327	97	2	0.6	1852	201	11.3	1.2	907	156	5.5	0.9	4713	357	28.7	2	3954	321	24.1	1.9	1622	142	9.9
0500000US39137	39137	Putnam County, Ohio	13083	175	13083	(X)	9725	256	74.3	1.9	4272	234	32.7	1.7	8225	246	62.9	1.9	3445	198	26.3	1.5	461	117	3.5	0.9	218	77	1.7	0.6	1039	183	7.9	1.4	609	129	4.7	1	3358	253	25.7	1.9	2816	251	21.5	1.9	1346	157	10.3
0500000US39139	39139	Richland County, Ohio	48636	616	48636	(X)	32315	667	66.4	1.1	13224	563	27.2	1	24237	693	49.8	1.3	8411	459	17.3	0.9	1772	269	3.6	0.6	977	233	2	0.5	6306	470	13	0.9	3836	405	7.9	0.8	16321	573	33.6	1.1	14414	618	29.6	1.2	6006	417	12.3
0500000US39141	39141	Ross County, Ohio	27966	495	27966	(X)	19056	538	68.1	1.5	8020	384	28.7	1.3	14479	529	51.8	1.7	5349	412	19.1	1.5	1210	229	4.3	0.8	658	166	2.4	0.6	3367	300	12	1.1	2013	227	7.2	0.8	8910	433	31.9	1.5	7476	402	26.7	1.4	3256	294	11.6
0500000US39143	39143	Sandusky County, Ohio	23905	346	23905	(X)	16482	447	68.9	1.8	6645	333	27.8	1.4	12758	418	53.4	1.7	4551	290	19	1.2	990	208	4.1	0.9	531	128	2.2	0.5	2734	260	11.4	1.1	1563	191	6.5	0.8	7423	467	31.1	1.8	6288	434	26.3	1.7	2782	230	11.6
0500000US39145	39145	Scioto County, Ohio	29570	456	29570	(X)	19562	505	66.2	1.6	7680	398	26	1.3	14665	551	49.6	1.8	5002	358	16.9	1.2	1305	232	4.4	0.8	807	187	2.7	0.6	3592	360	12.1	1.2	1871	298	6.3	1	10008	521	33.8	1.6	8568	500	29	1.6	3735	336	12.6
0500000US39147	39147	Seneca County, Ohio	21891	339	21891	(X)	15015	516	68.6	2.1	6417	337	29.3	1.4	11537	397	52.7	1.6	4227	255	19.3	1.1	1038	199	4.7	0.9	633	151	2.9	0.7	2440	287	11.1	1.3	1557	275	7.1	1.2	6876	457	31.4	2.1	5657	424	25.8	1.9	2423	216	11.1
0500000US39149	39149	Shelby County, Ohio	18287	326	18287	(X)	13383	328	73.2	1.6	6069	262	33.2	1.4	10527	347	57.6	2	4268	278	23.3	1.5	1085	249	5.9	1.3	773	210	4.2	1.1	1771	226	9.7	1.2	1028	188	5.6	1	4904	335	26.8	1.6	4033	301	22.1	1.6	1606	167	8.8
0500000US39151	39151	Stark County, Ohio	150299	1026	150299	(X)	99656	1246	66.3	0.7	40689	871	27.1	0.5	74033	1216	49.3	0.7	26219	796	17.4	0.5	6684	376	4.4	0.3	3414	362	2.3	0.2	18939	784	12.6	0.5	11056	643	7.4	0.4	50643	1165	33.7	0.7	43721	1230	29.1	0.8	17375	834	11.6
0500000US39153	39153	Summit County, Ohio	221296	1192	221296	(X)	139790	1703	63.2	0.7	59698	1215	27	0.5	101939	1374	46.1	0.6	39393	979	17.8	0.4	8383	578	3.8	0.3	3499	445	1.6	0.2	29468	1132	13.3	0.5	16806	867	7.6	0.4	81506	1638	36.8	0.7	69239	1551	31.3	0.7	24203	859	10.9
0500000US39155	39155	Trumbull County, Ohio	86760	709	86760	(X)	55801	758	64.3	0.9	21198	654	24.4	0.7	40229	788	46.4	0.9	13139	560	15.1	0.7	4018	397	4.6	0.5	1552	266	1.8	0.3	11554	540	13.3	0.6	6507	483	7.5	0.5	30959	892	35.7	0.9	26871	791	31	0.8	10952	522	12.6
0500000US39157	39157	Tuscarawas County, Ohio	36298	481	36298	(X)	25067	598	69.1	1.5	10119	451	27.9	1.2	20122	519	55.4	1.5	7204	392	19.8	1.1	1417	243	3.9	0.7	730	180	2	0.5	3528	396	9.7	1.1	2185	344	6	0.9	11231	576	30.9	1.5	9676	484	26.7	1.2	4486	308	12.4
0500000US39159	39159	Union County, Ohio	18113	321	18113	(X)	13388	410	73.9	2.1	7102	359	39.2	1.9	11164	403	61.6	2.2	5654	320	31.2	1.7	679	176	3.7	1	417	158	2.3	0.9	1545	272	8.5	1.5	1031	232	5.7	1.3	4725	409	26.1	2.1	3814	342	21.1	1.8	1327	202	7.3
0500000US39161	39161	Van Wert County, Ohio	11296	251	11296	(X)	7904	288	70	2.1	3139	208	27.8	1.7	6692	285	59.2	2.3	2493	196	22.1	1.6	339	118	3	1	174	74	1.5	0.7	873	136	7.7	1.2	472	110	4.2	1	3392	253	30	2.1	3076	255	27.2	2.1	1305	155	11.6
0500000US39163	39163	Vinton County, Ohio	5313	189	5313	(X)	3695	213	69.5	3.6	1563	195	29.4	3.4	2749	225	51.7	4	1001	187	18.8	3.4	212	90	4	1.7	139	82	2.6	1.5	734	140	13.8	2.6	423	112	8	2.1	1618	206	30.5	3.6	1443	188	27.2	3.2	656	111	12.3
0500000US39165	39165	Warren County, Ohio	75875	564	75875	(X)	57644	850	76	0.9	28628	679	37.7	0.8	48379	1008	63.8	1.2	22691	690	29.9	0.9	2516	335	3.3	0.4	1497	286	2	0.4	6749	461	8.9	0.6	4440	430	5.9	0.6	18231	714	24	0.9	14855	653	19.6	0.9	5516	403	7.3
0500000US39167	39167	Washington County, Ohio	24975	381	24975	(X)	16746	452	67.1	1.6	6487	312	26	1.1	13595	419	54.4	1.5	4762	259	19.1	1	748	157	3	0.6	428	135	1.7	0.5	2403	256	9.6	1	1297	203	5.2	0.8	8229	432	32.9	1.6	6970	429	27.9	1.6	2610	256	10.5
0500000US39169	39169	Wayne County, Ohio	42354	485	42354	(X)	30267	571	71.5	1.2	12392	371	29.3	0.8	24728	553	58.4	1.2	9373	404	22.1	0.9	1600	263	3.8	0.6	717	193	1.7	0.5	3939	354	9.3	0.8	2302	247	5.4	0.6	12087	541	28.5	1.2	10306	509	24.3	1.2	4331	304	10.2
0500000US39171	39171	Williams County, Ohio	15033	348	15033	(X)	10362	320	68.9	1.8	4156	281	27.6	1.7	8216	304	54.7	1.9	2800	234	18.6	1.4	673	165	4.5	1.1	470	152	3.1	1	1473	174	9.8	1.1	886	153	5.9	1	4671	319	31.1	1.8	3969	293	26.4	1.7	1687	180	11.2
0500000US39173	39173	Wood County, Ohio	48789	610	48789	(X)	30892	586	63.3	1.2	13179	546	27	1.1	24860	510	51	1.1	9571	400	19.6	0.8	1689	246	3.5	0.5	985	185	2	0.4	4343	390	8.9	0.8	2623	347	5.4	0.7	17897	699	36.7	1.2	13492	650	27.7	1.2	4505	366	9.2
0500000US39175	39175	Wyandot County, Ohio	9281	187	9281	(X)	6266	264	67.5	2.5	2717	187	29.3	1.9	5139	265	55.4	2.7	2095	172	22.6	1.8	355	111	3.8	1.2	127	51	1.4	0.5	772	154	8.3	1.6	495	137	5.3	1.5	3015	237	32.5	2.5	2523	228	27.2	2.4	1032	149	11.1
0500000US42001	42001	Adams County, Pennsylvania	38291	411	38291	(X)	27581	527	72	1.2	11039	375	28.8	0.9	22267	538	58.2	1.4	8024	371	21	1	1692	199	4.4	0.5	901	141	2.4	0.4	3622	384	9.5	1	2114	275	5.5	0.7	10710	460	28	1.2	8996	446	23.5	1.1	4007	325	10.5
0500000US42003	42003	Allegheny County, Pennsylvania	524392	2562	524392	(X)	305041	2017	58.2	0.3	123179	1500	23.5	0.2	224583	1951	42.8	0.3	82849	1437	15.8	0.3	18609	761	3.5	0.1	8044	564	1.5	0.1	61849	1172	11.8	0.2	32286	1025	6.2	0.2	219351	2294	41.8	0.3	184952	2468	35.3	0.4	69524	1512	13.3
0500000US42005	42005	Armstrong County, Pennsylvania	28724	343	28724	(X)	19728	375	68.7	1.2	7356	288	25.6	1	15497	367	54	1.3	5023	254	17.5	0.9	1625	223	5.7	0.8	881	178	3.1	0.6	2606	244	9.1	0.8	1452	175	5.1	0.6	8996	398	31.3	1.2	8011	367	27.9	1.2	4016	212	14
0500000US42007	42007	Beaver County, Pennsylvania	70715	622	70715	(X)	47035	747	66.5	0.9	17182	495	24.3	0.7	35783	761	50.6	1	11793	509	16.7	0.7	2851	276	4	0.4	1191	193	1.7	0.3	8401	420	11.9	0.6	4198	347	5.9	0.5	23680	698	33.5	0.9	20754	686	29.3	0.9	9415	442	13.3
0500000US42009	42009	Bedford County, Pennsylvania	20159	272	20159	(X)	14136	335	70.1	1.2	5211	236	25.8	1	11303	344	56.1	1.5	3697	221	18.3	1	871	125	4.3	0.6	482	95	2.4	0.5	1962	248	9.7	1.2	1032	191	5.1	0.9	6023	238	29.9	1.2	5396	245	26.8	1.2	2564	196	12.7
0500000US42011	42011	Berks County, Pennsylvania	153977	999	153977	(X)	106998	1182	69.5	0.6	46861	948	30.4	0.6	80423	1104	52.2	0.6	30648	737	19.9	0.4	7904	557	5.1	0.4	4456	456	2.9	0.3	18671	820	12.1	0.5	11757	646	7.6	0.4	46979	984	30.5	0.6	37974	918	24.7	0.6	15527	556	10.1
0500000US42013	42013	Blair County, Pennsylvania	51490	515	51490	(X)	33355	701	64.8	1.2	13238	498	25.7	0.9	25060	615	48.7	1.2	8611	404	16.7	0.8	2418	294	4.7	0.6	1308	253	2.5	0.5	5877	436	11.4	0.8	3319	303	6.4	0.6	18135	652	35.2	1.2	15488	600	30.1	1.1	7111	376	13.8
0500000US42015	42015	Bradford County, Pennsylvania	24445	359	24445	(X)	16601	314	67.9	1.3	6310	247	25.8	1	12914	286	52.8	1.2	4259	206	17.4	0.8	1108	122	4.5	0.5	550	94	2.2	0.4	2579	211	10.6	0.8	1501	181	6.1	0.7	7844	365	32.1	1.3	6636	337	27.1	1.2	3039	233	12.4
0500000US42017	42017	Bucks County, Pennsylvania	229933	1110	229933	(X)	165687	1567	72.1	0.6	69849	1244	30.4	0.5	136085	1551	59.2	0.6	56099	1251	24.4	0.5	8231	640	3.6	0.3	3297	392	1.4	0.2	21371	915	9.3	0.4	10453	593	4.5	0.3	64246	1524	27.9	0.6	54062	1259	23.5	0.5	22219	833	9.7
0500000US42019	42019	Butler County, Pennsylvania	72867	595	72867	(X)	49961	624	68.6	0.8	21766	511	29.9	0.7	41444	643	56.9	0.9	16822	495	23.1	0.7	2179	236	3	0.3	1110	196	1.5	0.3	6338	419	8.7	0.6	3834	330	5.3	0.5	22906	632	31.4	0.8	19189	564	26.3	0.7	7648	418	10.5
0500000US42021	42021	Cambria County, Pennsylvania	58502	530	58502	(X)	37672	617	64.4	0.9	13910	399	23.8	0.7	28561	590	48.8	1	9323	378	15.9	0.7	2625	248	4.5	0.4	1138	202	1.9	0.3	6486	359	11.1	0.6	3449	283	5.9	0.5	20830	587	35.6	0.9	18306	523	31.3	0.8	8671	380	14.8
0500000US42023	42023	Cameron County, Pennsylvania	2184	85	2184	(X)	1329	77	60.9	3.2	446	70	20.4	3	1070	74	49	3.2	304	64	13.9	2.8	94	35	4.3	1.6	36	18	1.6	0.8	165	44	7.6	2	106	35	4.9	1.6	855	85	39.1	3.2	724	81	33.2	3.2	375	60	17.2
0500000US42025	42025	Carbon County, Pennsylvania	26256	475	26256	(X)	18071	538	68.8	1.7	6444	383	24.5	1.3	14277	483	54.4	1.8	4623	415	17.6	1.6	1149	212	4.4	0.8	390	130	1.5	0.5	2645	336	10.1	1.2	1431	246	5.5	0.9	8185	495	31.2	1.7	6527	459	24.9	1.6	2940	248	11.2
0500000US42027	42027	Centre County, Pennsylvania	56526	669	56526	(X)	32294	612	57.1	1	12779	441	22.6	0.8	26828	608	47.5	1	9766	463	17.3	0.8	1792	265	3.2	0.5	890	196	1.6	0.4	3674	397	6.5	0.7	2123	256	3.8	0.5	24232	724	42.9	1	15442	760	27.3	1.3	4590	326	8.1
0500000US42029	42029	Chester County, Pennsylvania	183793	972	183793	(X)	130429	1244	71	0.6	62220	976	33.9	0.5	109579	1337	59.6	0.7	51345	895	27.9	0.5	6210	536	3.4	0.3	3297	381	1.8	0.2	14640	754	8	0.4	7578	579	4.1	0.3	53364	1214	29	0.6	43006	1109	23.4	0.6	15821	660	8.6
0500000US42031	42031	Clarion County, Pennsylvania	15638	294	15638	(X)	10135	229	64.8	1.4	3965	191	25.4	1.2	8067	208	51.6	1.2	2807	165	17.9	1	651	106	4.2	0.7	323	80	2.1	0.5	1417	123	9.1	0.8	835	107	5.3	0.7	5503	284	35.2	1.4	4372	249	28	1.4	1911	139	12.2
0500000US42033	42033	Clearfield County, Pennsylvania	32435	394	32435	(X)	21873	469	67.4	1.2	8354	398	25.8	1.1	17310	427	53.4	1.2	5734	339	17.7	1	1462	248	4.5	0.8	756	201	2.3	0.6	3101	329	9.6	1	1864	289	5.7	0.9	10562	407	32.6	1.2	9338	415	28.8	1.2	4393	284	13.5
0500000US42035	42035	Clinton County, Pennsylvania	15286	265	15286	(X)	9635	325	63	1.9	3756	168	24.6	1	7312	307	47.8	1.8	2397	178	15.7	1.1	703	140	4.6	0.9	415	95	2.7	0.6	1620	176	10.6	1.1	944	140	6.2	0.9	5651	321	37	1.9	4526	311	29.6	2	2086	175	13.6
0500000US42037	42037	Columbia County, Pennsylvania	26012	505	26012	(X)	16755	417	64.4	1.5	6545	306	25.2	1.1	13129	400	50.5	1.4	4504	292	17.3	1	1071	205	4.1	0.8	514	146	2	0.6	2555	242	9.8	0.9	1527	200	5.9	0.8	9257	474	35.6	1.5	7074	390	27.2	1.4	3260	195	12.5
0500000US42039	42039	Crawford County, Pennsylvania	35232	421	35232	(X)	23387	528	66.4	1.3	9043	378	25.7	1	18234	472	51.8	1.1	6051	274	17.2	0.8	1605	214	4.6	0.6	899	170	2.6	0.5	3548	298	10.1	0.8	2093	248	5.9	0.7	11845	484	33.6	1.3	10154	439	28.8	1.2	4206	309	11.9
0500000US42041	42041	Cumberland County, Pennsylvania	94776	673	94776	(X)	61924	814	65.3	0.8	25775	616	27.2	0.6	50566	776	53.4	0.8	19163	587	20.2	0.6	3202	357	3.4	0.4	1678	264	1.8	0.3	8156	503	8.6	0.5	4934	407	5.2	0.4	32852	856	34.7	0.8	27109	875	28.6	0.9	10203	545	10.8
0500000US42043	42043	Dauphin County, Pennsylvania	107996	967	107996	(X)	67740	882	62.7	0.8	29427	798	27.2	0.8	48004	1056	44.4	0.9	17921	663	16.6	0.6	5103	480	4.7	0.4	2870	362	2.7	0.3	14633	631	13.5	0.6	8636	547	8	0.5	40256	980	37.3	0.8	33795	923	31.3	0.8	11414	514	10.6
0500000US42045	42045	Delaware County, Pennsylvania	206021	946	206021	(X)	137815	1338	66.9	0.6	62183	958	30.2	0.4	99165	1221	48.1	0.6	42334	916	20.5	0.4	9677	557	4.7	0.3	4207	435	2	0.2	28973	983	14.1	0.5	15642	783	7.6	0.4	68206	1346	33.1	0.6	58275	1255	28.3	0.6	23444	634	11.4
0500000US42047	42047	Elk County, Pennsylvania	13631	257	13631	(X)	9003	365	66	2.3	3458	269	25.4	1.8	6821	349	50	2.4	2234	192	16.4	1.4	711	150	5.2	1.1	392	122	2.9	0.9	1471	230	10.8	1.6	832	173	6.1	1.2	4628	325	34	2.3	4198	298	30.8	2.1	1917	212	14.1
0500000US42049	42049	Erie County, Pennsylvania	109006	777	109006	(X)	69896	692	64.1	0.6	29551	794	27.1	0.7	51006	722	46.8	0.6	18345	632	16.8	0.6	4918	442	4.5	0.4	2669	382	2.4	0.3	13972	620	12.8	0.6	8537	553	7.8	0.5	39110	855	35.9	0.6	32561	904	29.9	0.7	11944	543	11
0500000US42051	42051	Fayette County, Pennsylvania	54730	610	54730	(X)	36258	677	66.2	1	13583	544	24.8	0.9	26431	677	48.3	1.1	8527	468	15.6	0.8	2665	377	4.9	0.7	1178	221	2.2	0.4	7162	447	13.1	0.8	3878	358	7.1	0.6	18472	580	33.8	1	15946	580	29.1	1	7527	408	13.8
0500000US42053	42053	Forest County, Pennsylvania	1958	143	1958	(X)	1217	108	62.2	3	205	63	10.5	2.7	1039	97	53.1	3.2	129	50	6.6	2.2	54	28	2.8	1.4	21	18	1.1	0.9	124	33	6.3	1.7	55	21	2.8	1.1	741	79	37.8	3	651	74	33.2	3.2	334	59	17.1
0500000US42055	42055	Franklin County, Pennsylvania	58044	568	58044	(X)	40063	774	69	1.2	16726	624	28.8	1	32170	822	55.4	1.3	11803	593	20.3	1	2464	375	4.2	0.6	1523	300	2.6	0.5	5429	396	9.4	0.7	3400	342	5.9	0.6	17981	700	31	1.2	15317	651	26.4	1.1	6693	410	11.5
0500000US42057	42057	Fulton County, Pennsylvania	5973	133	5973	(X)	4193	140	70.2	2.1	1565	87	26.2	1.4	3389	122	56.7	2.1	1156	85	19.4	1.4	273	50	4.6	0.8	161	40	2.7	0.7	531	79	8.9	1.3	248	55	4.2	0.9	1780	141	29.8	2.1	1435	133	24	2.1	676	61	11.3
0500000US42059	42059	Greene County, Pennsylvania	14119	328	14119	(X)	9505	347	67.3	1.9	3676	247	26	1.5	7418	304	52.5	2.1	2623	224	18.6	1.6	549	120	3.9	0.8	209	71	1.5	0.5	1538	210	10.9	1.4	844	177	6	1.2	4614	286	32.7	1.9	3897	263	27.6	1.7	1953	180	13.8
0500000US42061	42061	Huntingdon County, Pennsylvania	16882	274	16882	(X)	11622	312	68.8	1.5	4309	221	25.5	1.2	9389	283	55.6	1.5	3073	198	18.2	1.1	708	121	4.2	0.7	402	91	2.4	0.5	1525	158	9	0.9	834	172	4.9	1	5260	258	31.2	1.5	4690	245	27.8	1.4	2158	166	12.8
0500000US42063	42063	Indiana County, Pennsylvania	34483	643	34483	(X)	22132	488	64.2	1.3	8135	313	23.6	0.8	17832	511	51.7	1.4	5923	309	17.2	0.9	1306	207	3.8	0.6	599	126	1.7	0.4	2994	288	8.7	0.8	1613	240	4.7	0.7	12351	557	35.8	1.3	9382	476	27.2	1.3	3748	308	10.9
0500000US42065	42065	Jefferson County, Pennsylvania	18313	260	18313	(X)	12220	246	66.7	1.2	4598	177	25.1	0.9	9719	279	53.1	1.5	3190	163	17.4	0.9	792	92	4.3	0.5	344	67	1.9	0.4	1709	168	9.3	0.9	1064	132	5.8	0.7	6093	256	33.3	1.2	5252	253	28.7	1.2	2519	136	13.8
0500000US42067	42067	Juniata County, Pennsylvania	9266	165	9266	(X)	6733	215	72.7	2	2583	157	27.9	1.6	5661	207	61.1	2.2	2000	159	21.6	1.7	362	86	3.9	0.9	189	66	2	0.7	710	112	7.7	1.2	394	91	4.3	1	2533	198	27.3	2	2106	185	22.7	1.9	1028	129	11.1
0500000US42069	42069	Lackawanna County, Pennsylvania	86155	719	86155	(X)	55264	791	64.1	0.9	22611	639	26.2	0.7	40388	728	46.9	0.8	15201	529	17.6	0.6	4106	401	4.8	0.5	1718	266	2	0.3	10770	465	12.5	0.5	5692	424	6.6	0.5	30891	869	35.9	0.9	26213	882	30.4	0.9	11689	574	13.6
0500000US42071	42071	Lancaster County, Pennsylvania	193306	813	193306	(X)	136556	1406	70.6	0.6	57827	977	29.9	0.5	112056	1387	58	0.7	44332	911	22.9	0.5	7175	707	3.7	0.4	3425	461	1.8	0.2	17325	890	9	0.5	10070	690	5.2	0.4	56750	1253	29.4	0.6	46690	1112	24.2	0.6	19589	768	10.1
0500000US42073	42073	Lawrence County, Pennsylvania	36712	423	36712	(X)	24980	429	68	1.2	9740	387	26.5	1	18756	565	51.1	1.6	6528	378	17.8	1	1498	200	4.1	0.5	638	138	1.7	0.4	4726	366	12.9	1	2574	253	7	0.7	11732	490	32	1.2	10565	495	28.8	1.2	5202	329	14.2
0500000US42075	42075	Lebanon County, Pennsylvania	52144	456	52144	(X)	36338	668	69.7	1.2	15304	494	29.3	0.9	28848	659	55.3	1.2	10745	479	20.6	0.9	2388	304	4.6	0.6	1262	239	2.4	0.5	5102	381	9.8	0.7	3297	330	6.3	0.6	15806	662	30.3	1.2	13238	532	25.4	1	5982	379	11.5
0500000US42077	42077	Lehigh County, Pennsylvania	133302	751	133302	(X)	90673	980	68	0.7	41129	876	30.9	0.6	67180	1123	50.4	0.7	27544	728	20.7	0.5	6197	547	4.6	0.4	3113	488	2.3	0.4	17296	801	13	0.6	10472	651	7.9	0.5	42629	961	32	0.7	35297	980	26.5	0.7	14124	628	10.6
0500000US42079	42079	Luzerne County, Pennsylvania	131000	988	131000	(X)	82609	918	63.1	0.6	32510	851	24.8	0.6	59306	870	45.3	0.7	20494	657	15.6	0.5	6394	431	4.9	0.3	2745	298	2.1	0.2	16909	615	12.9	0.5	9271	534	7.1	0.4	48391	947	36.9	0.6	42123	960	32.2	0.7	19152	700	14.6
0500000US42081	42081	Lycoming County, Pennsylvania	46476	541	46476	(X)	30397	624	65.4	1.3	12142	470	26.1	1	23373	493	50.3	1.1	7872	278	16.9	0.6	1967	261	4.2	0.6	1051	190	2.3	0.4	5057	398	10.9	0.8	3219	343	6.9	0.7	16079	681	34.6	1.3	12931	596	27.8	1.2	5432	346	11.7
0500000US42083	42083	McKean County, Pennsylvania	17394	485	17394	(X)	11479	391	66	1.5	4664	323	26.8	1.5	8401	317	48.3	1.5	2847	231	16.4	1.2	999	140	5.7	0.8	561	123	3.2	0.7	2079	211	12	1.2	1256	171	7.2	1	5915	330	34	1.5	5154	323	29.6	1.6	2283	200	13.1
0500000US42085	42085	Mercer County, Pennsylvania	46389	453	46389	(X)	30970	532	66.8	1.1	11937	435	25.7	0.9	23729	542	51.2	1.1	8103	393	17.5	0.8	1756	185	3.8	0.4	846	145	1.8	0.3	5485	403	11.8	0.9	2988	300	6.4	0.6	15419	571	33.2	1.1	13757	561	29.7	1.1	6245	411	13.5
0500000US42087	42087	Mifflin County, Pennsylvania	18952	290	18952	(X)	12686	408	66.9	2	5013	281	26.5	1.4	9908	395	52.3	2	3519	268	18.6	1.4	817	186	4.3	1	387	125	2	0.7	1961	263	10.3	1.4	1107	213	5.8	1.1	6266	388	33.1	2	5345	398	28.2	2	2624	234	13.8
0500000US42089	42089	Monroe County, Pennsylvania	59299	931	59299	(X)	43897	1063	74	1.4	19829	849	33.4	1.4	32950	1027	55.6	1.6	13633	770	23	1.3	2968	469	5	0.8	1614	392	2.7	0.7	7979	690	13.5	1.1	4582	502	7.7	0.8	15402	879	26	1.4	12068	763	20.4	1.2	4598	521	7.8
0500000US42091	42091	Montgomery County, Pennsylvania	308083	1248	308083	(X)	208803	1406	67.8	0.5	94135	1151	30.6	0.4	169758	1551	55.1	0.5	73949	1179	24	0.4	10670	651	3.5	0.2	5285	484	1.7	0.2	28375	975	9.2	0.3	14901	684	4.8	0.2	99280	1663	32.2	0.5	83568	1430	27.1	0.4	33272	1115	10.8
0500000US42093	42093	Montour County, Pennsylvania	7268	165	7268	(X)	5048	171	69.5	2.5	1842	134	25.3	1.8	4109	185	56.5	2.6	1410	151	19.4	2.1	255	84	3.5	1.2	166	73	2.3	1	684	132	9.4	1.8	266	77	3.7	1.1	2220	212	30.5	2.5	1978	208	27.2	2.6	859	139	11.8
0500000US42095	42095	Northampton County, Pennsylvania	112242	797	112242	(X)	77145	1058	68.7	0.8	32433	749	28.9	0.6	60091	965	53.5	0.8	23285	695	20.7	0.6	4821	433	4.3	0.4	2316	312	2.1	0.3	12233	596	10.9	0.5	6832	434	6.1	0.4	35097	978	31.3	0.8	28665	923	25.5	0.8	12875	534	11.5
0500000US42097	42097	Northumberland County, Pennsylvania	39220	433	39220	(X)	25822	451	65.8	1.1	9603	323	24.5	0.8	19977	430	50.9	1.1	6470	314	16.5	0.8	1625	202	4.1	0.5	722	135	1.8	0.3	4220	350	10.8	0.9	2411	263	6.1	0.7	13398	490	34.2	1.1	11469	460	29.2	1.1	5525	326	14.1
0500000US42099	42099	Perry County, Pennsylvania	18160	217	18160	(X)	13124	311	72.3	1.4	5309	226	29.2	1.2	10626	328	58.5	1.6	3854	227	21.2	1.2	727	133	4	0.7	400	108	2.2	0.6	1771	175	9.8	1	1055	162	5.8	0.9	5036	262	27.7	1.4	3932	256	21.7	1.4	1464	121	8.1
0500000US42101	42101	Philadelphia County, Pennsylvania	580509	2616	580509	(X)	312290	2849	53.8	0.4	138485	2221	23.9	0.4	160378	2190	27.6	0.4	61870	1698	10.7	0.3	32189	1553	5.5	0.3	13554	1123	2.3	0.2	119723	2034	20.6	0.3	63061	1388	10.9	0.2	268219	2954	46.2	0.4	227141	2942	39.1	0.5	67784	1564	11.7
0500000US42103	42103	Pike County, Pennsylvania	21980	614	21980	(X)	15941	592	72.5	2.2	6790	393	30.9	1.6	12313	518	56	1.9	4654	368	21.2	1.5	1021	227	4.6	1	595	176	2.7	0.8	2607	307	11.9	1.4	1541	258	7	1.2	6039	555	27.5	2.2	5119	515	23.3	2.1	1853	247	8.4
0500000US42105	42105	Potter County, Pennsylvania	7057	143	7057	(X)	4811	133	68.2	1.6	1631	101	23.1	1.3	3844	146	54.5	2.1	1161	96	16.5	1.3	337	61	4.8	0.9	136	34	1.9	0.5	630	86	8.9	1.2	334	63	4.7	0.9	2246	134	31.8	1.6	1938	125	27.5	1.6	850	71	12
0500000US42107	42107	Schuylkill County, Pennsylvania	60121	624	60121	(X)	39477	711	65.7	1.2	15445	452	25.7	0.8	29455	630	49	1	10339	358	17.2	0.6	3323	320	5.5	0.5	1610	214	2.7	0.4	6699	423	11.1	0.7	3496	354	5.8	0.6	20644	789	34.3	1.2	17587	744	29.3	1.1	8587	461	14.3
0500000US42109	42109	Snyder County, Pennsylvania	14355	264	14355	(X)	10284	297	71.6	1.7	4162	212	29	1.3	8534	301	59.4	2	3150	181	21.9	1.2	665	107	4.6	0.7	415	93	2.9	0.6	1085	158	7.6	1.1	597	113	4.2	0.8	4071	269	28.4	1.7	3406	241	23.7	1.6	1621	168	11.3
0500000US42111	42111	Somerset County, Pennsylvania	29992	485	29992	(X)	20453	369	68.2	0.9	7271	318	24.2	0.9	17097	346	57	1	5691	279	19	0.8	1128	179	3.8	0.6	549	107	1.8	0.4	2228	208	7.4	0.7	1031	142	3.4	0.5	9539	353	31.8	0.9	8390	327	28	0.9	4287	271	14.3
0500000US42113	42113	Sullivan County, Pennsylvania	2376	121	2376	(X)	1563	116	65.8	3.3	446	59	18.8	2.3	1344	119	56.6	3.7	344	52	14.5	2	109	36	4.6	1.6	49	26	2.1	1.1	110	34	4.6	1.4	53	23	2.2	0.9	813	87	34.2	3.3	729	82	30.7	3.2	344	58	14.5
0500000US42115	42115	Susquehanna County, Pennsylvania	17139	297	17139	(X)	11821	305	69	1.2	4245	221	24.8	1.2	9395	283	54.8	1.4	3003	178	17.5	1	772	96	4.5	0.6	350	63	2	0.4	1654	180	9.7	1	892	133	5.2	0.8	5318	228	31	1.2	4424	203	25.8	1.1	1916	144	11.2
0500000US42117	42117	Tioga County, Pennsylvania	17098	276	17098	(X)	11888	264	69.5	1.2	4438	202	26	1.1	9272	280	54.2	1.4	2959	187	17.3	1	813	112	4.8	0.7	433	85	2.5	0.5	1803	165	10.5	0.9	1046	144	6.1	0.8	5210	242	30.5	1.2	4209	207	24.6	1.2	1965	149	11.5
0500000US42119	42119	Union County, Pennsylvania	15303	448	15303	(X)	10417	469	68.1	2.1	4190	323	27.4	1.7	8423	380	55	2.1	2984	222	19.5	1.4	682	172	4.5	1.1	464	153	3	1	1312	244	8.6	1.5	742	191	4.8	1.2	4886	334	31.9	2.1	3803	309	24.9	2.1	1559	185	10.2
0500000US42121	42121	Venango County, Pennsylvania	22525	338	22525	(X)	15066	358	66.9	1.5	5674	276	25.2	1.1	11613	336	51.6	1.5	3622	181	16.1	0.8	1027	141	4.6	0.6	512	111	2.3	0.5	2426	203	10.8	0.9	1540	195	6.8	0.8	7459	383	33.1	1.5	6475	320	28.7	1.3	2782	209	12.4
0500000US42123	42123	Warren County, Pennsylvania	17453	284	17453	(X)	11573	298	66.3	1.4	4069	198	23.3	1	9358	360	53.6	1.9	2918	200	16.7	1	760	133	4.4	0.8	357	94	2	0.5	1455	152	8.3	0.9	794	125	4.5	0.7	5880	277	33.7	1.4	5123	285	29.4	1.5	2208	166	12.7
0500000US42125	42125	Washington County, Pennsylvania	84123	668	84123	(X)	56116	819	66.7	1	22003	586	26.2	0.6	44665	860	53.1	1	16432	544	19.5	0.6	3062	315	3.6	0.4	1352	212	1.6	0.3	8389	506	10	0.6	4219	392	5	0.5	28007	902	33.3	1	23868	845	28.4	0.9	11109	497	13.2
0500000US42127	42127	Wayne County, Pennsylvania	19216	412	19216	(X)	13332	435	69.4	1.6	4799	280	25	1.3	10951	373	57	1.5	3467	229	18	1.1	832	172	4.3	0.9	487	135	2.5	0.7	1549	186	8.1	0.9	845	155	4.4	0.8	5884	329	30.6	1.6	5006	302	26.1	1.5	2236	238	11.6
0500000US42129	42129	Westmoreland County, Pennsylvania	153064	988	153064	(X)	102416	894	66.9	0.5	37502	802	24.5	0.5	79918	979	52.2	0.7	26072	747	17	0.5	5870	489	3.8	0.3	2598	358	1.7	0.2	16628	737	10.9	0.5	8832	593	5.8	0.4	50648	930	33.1	0.5	44070	900	28.8	0.5	20427	660	13.3
0500000US42131	42131	Wyoming County, Pennsylvania	11037	197	11037	(X)	7657	190	69.4	1.4	2916	156	26.4	1.3	5913	199	53.6	1.7	1953	151	17.7	1.3	584	99	5.3	0.9	290	62	2.6	0.6	1160	127	10.5	1.1	673	89	6.1	0.8	3380	179	30.6	1.4	2700	139	24.5	1.2	1203	101	10.9
0500000US42133	42133	York County, Pennsylvania	168128	888	168128	(X)	118274	1073	70.3	0.6	50408	872	30	0.5	92622	1142	55.1	0.6	35145	865	20.9	0.5	7504	546	4.5	0.3	4310	470	2.6	0.3	18148	719	10.8	0.4	10953	561	6.5	0.3	49854	1088	29.7	0.6	40990	1024	24.4	0.6	17201	717	10.2
0500000US51001	51001	Accomack County, Virginia	14286	556	14286	(X)	9156	563	64.1	3.2	3165	386	22.2	2.4	6718	412	47	2.7	1881	212	13.2	1.4	682	227	4.8	1.6	348	191	2.4	1.3	1756	286	12.3	1.8	936	234	6.6	1.5	5130	500	35.9	3.2	4427	468	31	3	1856	248	13
0500000US51003	51003	Albemarle County, Virginia	37549	765	37549	(X)	24110	676	64.2	1.5	10265	511	27.3	1.2	20043	633	53.4	1.5	8062	402	21.5	1	839	187	2.2	0.5	416	149	1.1	0.4	3228	435	8.6	1.1	1787	357	4.8	0.9	13439	649	35.8	1.5	11172	550	29.8	1.4	3819	295	10.2
0500000US51005	51005	Alleghany County, Virginia	6851	211	6851	(X)	4777	226	69.7	3	1595	173	23.3	2.3	3898	210	56.9	3.1	1208	142	17.6	2	270	91	3.9	1.3	89	56	1.3	0.8	609	139	8.9	2	298	117	4.3	1.7	2074	225	30.3	3	1774	206	25.9	2.7	985	138	14.4
0500000US51007	51007	Amelia County, Virginia	4777	233	4777	(X)	3544	256	74.2	4.3	1469	220	30.8	4.1	2654	269	55.6	5.7	938	201	19.6	4	197	100	4.1	2.1	110	71	2.3	1.5	693	179	14.5	3.5	421	159	8.8	3.2	1233	223	25.8	4.3	1069	203	22.4	4.1	415	142	8.7
0500000US51009	51009	Amherst County, Virginia	12683	333	12683	(X)	8565	330	67.5	2.3	3188	279	25.1	2	6379	316	50.3	2.5	2048	232	16.1	1.8	388	121	3.1	0.9	193	95	1.5	0.7	1798	240	14.2	1.8	947	179	7.5	1.4	4118	329	32.5	2.3	3494	313	27.5	2.3	1412	184	11.1
0500000US51011	51011	Appomattox County, Virginia	5902	197	5902	(X)	4285	231	72.6	3.2	1812	198	30.7	2.9	3156	273	53.5	4.2	1152	209	19.5	3.3	424	127	7.2	2.2	184	84	3.1	1.4	705	167	11.9	2.8	476	153	8.1	2.6	1617	199	27.4	3.2	1400	192	23.7	3.1	714	131	12.1
0500000US51013	51013	Arlington County, Virginia	92992	935	92992	(X)	41738	999	44.9	1	18145	663	19.5	0.7	33442	952	36	1	14376	642	15.5	0.7	2709	393	2.9	0.4	778	171	0.8	0.2	5587	472	6	0.5	2991	357	3.2	0.4	51254	1070	55.1	1	37857	1241	40.7	1.2	6411	438	6.9
0500000US51015	51015	Augusta County, Virginia	28297	396	28297	(X)	20948	555	74	1.8	8082	500	28.6	1.7	17004	641	60.1	2.2	5919	445	20.9	1.5	1254	262	4.4	0.9	688	187	2.4	0.7	2690	398	9.5	1.4	1475	326	5.2	1.1	7349	520	26	1.8	6476	498	22.9	1.7	3083	315	10.9
0500000US51017	51017	Bath County, Virginia	2008	213	2008	(X)	1383	147	68.9	8.5	482	119	24	7.1	1145	169	57	8.8	326	119	16.2	6.4	88	94	4.4	4.6	42	65	2.1	3.2	150	113	7.5	5.8	114	99	5.7	5	625	220	31.1	8.5	565	207	28.1	8.2	170	108	8.5
0500000US51019	51019	Bedford County, Virginia	27017	484	27017	(X)	19696	570	72.9	1.7	7421	408	27.5	1.4	16572	482	61.3	1.6	5523	339	20.4	1.1	1047	213	3.9	0.8	549	168	2	0.6	2077	280	7.7	1	1349	270	5	1	7321	479	27.1	1.7	6124	444	22.7	1.6	2438	306	9
0500000US51021	51021	Bland County, Virginia	2464	184	2464	(X)	1809	183	73.4	5.2	585	117	23.7	4.1	1440	189	58.4	5.7	509	114	20.7	3.9	89	49	3.6	2	18	20	0.7	0.8	280	99	11.4	4.1	58	55	2.4	2.2	655	141	26.6	5.2	602	138	24.4	5.2	242	95	9.8
0500000US51023	51023	Botetourt County, Virginia	12822	297	12822	(X)	9936	330	77.5	2.2	3423	229	26.7	1.6	8668	332	67.6	2.4	2933	231	22.9	1.7	267	126	2.1	1	114	58	0.9	0.5	1001	196	7.8	1.5	376	113	2.9	0.9	2886	306	22.5	2.2	2480	271	19.3	2	1108	199	8.6
0500000US51025	51025	Brunswick County, Virginia	6029	390	6029	(X)	4039	336	67	3.8	1245	234	20.7	3.3	2617	278	43.4	4.3	636	160	10.5	2.5	286	141	4.7	2.3	70	65	1.2	1.1	1136	210	18.8	3.1	539	173	8.9	2.7	1990	268	33	3.8	1770	245	29.4	3.5	771	114	12.8
0500000US51027	51027	Buchanan County, Virginia	9384	319	9384	(X)	6547	379	69.8	3	2371	287	25.3	2.8	5070	367	54	3.5	1587	247	16.9	2.5	448	174	4.8	1.8	175	121	1.9	1.3	1029	208	11	2.1	609	180	6.5	1.9	2837	280	30.2	3	2419	258	25.8	2.8	1014	167	10.8
0500000US51029	51029	Buckingham County, Virginia	5728	520	5728	(X)	4132	478	72.1	5.1	1509	320	26.3	4.1	2759	364	48.2	4.9	858	234	15	3.5	210	157	3.7	2.5	154	130	2.7	2.1	1163	238	20.3	4.3	497	172	8.7	3.1	1596	328	27.9	5.1	1373	297	24	4.8	711	158	12.4
0500000US51031	51031	Campbell County, Virginia	21581	497	21581	(X)	14897	567	69	2.3	5936	383	27.5	1.7	11082	603	51.4	2.7	3826	400	17.7	1.8	908	213	4.2	1	514	156	2.4	0.7	2907	420	13.5	1.9	1596	352	7.4	1.6	6684	526	31	2.3	5662	414	26.2	1.8	2044	257	9.5
0500000US51033	51033	Caroline County, Virginia	10649	277	10649	(X)	7777	372	73	2.8	3186	316	29.9	2.7	5533	335	52	3.1	2130	254	20	2.4	665	201	6.2	1.8	268	138	2.5	1.3	1579	293	14.8	2.7	788	209	7.4	1.9	2872	308	27	2.8	2273	317	21.3	2.9	862	182	8.1
0500000US51035	51035	Carroll County, Virginia	12622	389	12622	(X)	8619	417	68.3	2.9	3043	304	24.1	2.2	6968	385	55.2	2.7	2146	295	17	2.2	627	163	5	1.3	390	122	3.1	1	1024	212	8.1	1.7	507	151	4	1.2	4003	406	31.7	2.9	3747	403	29.7	2.9	1683	201	13.3
0500000US51036	51036	Charles City County, Virginia	2777	106	2777	(X)	1896	120	68.3	3.9	509	77	18.3	2.6	1351	122	48.6	4.3	339	58	12.2	2	164	46	5.9	1.7	66	34	2.4	1.2	381	81	13.7	2.8	104	39	3.7	1.4	881	118	31.7	3.9	780	112	28.1	3.8	365	73	13.1
0500000US51037	51037	Charlotte County, Virginia	4803	231	4803	(X)	3425	248	71.3	4.2	1297	184	27	3.4	2313	217	48.2	3.8	731	149	15.2	3	306	104	6.4	2.2	198	95	4.1	2	806	142	16.8	2.9	368	109	7.7	2.2	1378	216	28.7	4.2	1264	207	26.3	4	701	133	14.6
0500000US51041	51041	Chesterfield County, Virginia	113090	845	113090	(X)	83424	984	73.8	0.8	40576	847	35.9	0.7	64041	990	56.6	0.8	29747	787	26.3	0.7	4672	464	4.1	0.4	2420	335	2.1	0.3	14711	766	13	0.7	8409	595	7.4	0.5	29666	935	26.2	0.8	24919	849	22	0.7	7767	389	6.9
0500000US51043	51043	Clarke County, Virginia	5580	189	5580	(X)	4069	260	72.9	4.2	1495	165	26.8	2.9	3459	261	62	4.3	1181	155	21.2	2.8	191	87	3.4	1.6	99	63	1.8	1.1	419	120	7.5	2.1	215	96	3.9	1.7	1511	244	27.1	4.2	1051	213	18.8	3.6	314	108	5.6
0500000US51045	51045	Craig County, Virginia	2073	174	2073	(X)	1498	146	72.3	7.7	537	122	25.9	5.5	1187	139	57.3	7.8	393	111	19	5.4	63	70	3	3.4	47	67	2.3	3.2	248	112	12	5.3	97	64	4.7	3	575	189	27.7	7.7	504	179	24.3	7.5	224	92	10.8
0500000US51047	51047	Culpeper County, Virginia	15826	421	15826	(X)	11841	470	74.8	2.3	5586	383	35.3	2.2	9382	438	59.3	2.4	4030	353	25.5	2.2	698	181	4.4	1.1	491	152	3.1	1	1761	259	11.1	1.6	1065	239	6.7	1.5	3985	383	25.2	2.3	3234	381	20.4	2.3	1312	230	8.3
0500000US51049	51049	Cumberland County, Virginia	4016	177	4016	(X)	2712	253	67.5	5.8	930	172	23.2	3.8	2021	265	50.3	6.5	631	141	15.7	3.3	173	104	4.3	2.5	116	83	2.9	2	518	125	12.9	3.1	183	84	4.6	2	1304	243	32.5	5.8	1130	232	28.1	5.6	492	129	12.3
0500000US51051	51051	Dickenson County, Virginia	6404	168	6404	(X)	4436	241	69.3	3.2	1470	193	23	2.8	3300	248	51.5	3.6	936	177	14.6	2.7	371	103	5.8	1.6	179	81	2.8	1.3	765	144	11.9	2.2	355	112	5.5	1.7	1968	212	30.7	3.2	1740	204	27.2	3.1	646	142	10.1
0500000US51053	51053	Dinwiddie County, Virginia	9788	266	9788	(X)	7227	322	73.8	3.1	2884	237	29.5	2.2	5051	342	51.6	3.6	1798	252	18.4	2.6	370	140	3.8	1.4	188	94	1.9	1	1806	276	18.5	2.7	898	204	9.2	2	2561	323	26.2	3.1	2185	293	22.3	2.8	723	150	7.4
0500000US51057	51057	Essex County, Virginia	4351	197	4351	(X)	2737	236	62.9	5	1067	176	24.5	3.9	2118	229	48.7	5.1	722	144	16.6	3.2	181	79	4.2	1.8	109	71	2.5	1.6	438	128	10.1	2.9	236	82	5.4	1.8	1614	236	37.1	5	1313	195	30.2	4.1	528	120	12.1
0500000US51059	51059	Fairfax County, Virginia	388452	1334	388452	(X)	275386	1743	70.9	0.4	135164	1814	34.8	0.5	226475	2203	58.3	0.6	111227	1747	28.6	0.4	14675	842	3.8	0.2	5748	565	1.5	0.1	34236	1163	8.8	0.3	18189	952	4.7	0.2	113066	1845	29.1	0.4	90121	1839	23.2	0.4	23729	880	6.1
0500000US51061	51061	Fauquier County, Virginia	23031	380	23031	(X)	17150	458	74.5	1.7	7366	364	32	1.6	14221	500	61.7	2.1	5795	401	25.2	1.8	930	203	4	0.9	493	173	2.1	0.7	1999	319	8.7	1.4	1078	224	4.7	1	5881	426	25.5	1.7	4770	408	20.7	1.7	1911	234	8.3
0500000US51063	51063	Floyd County, Virginia	6076	313	6076	(X)	4130	266	68	4.3	1421	233	23.4	3.5	3620	250	59.6	4.3	1251	208	20.6	3.2	91	60	1.5	1	41	37	0.7	0.6	419	130	6.9	2.1	129	77	2.1	1.2	1946	313	32	4.3	1645	280	27.1	4	688	174	11.3
0500000US51065	51065	Fluvanna County, Virginia	9419	258	9419	(X)	7005	369	74.4	3.4	2525	258	26.8	2.4	5771	323	61.3	3.1	2034	207	21.6	2	313	105	3.3	1.1	94	60	1	0.6	921	206	9.8	2.1	397	138	4.2	1.4	2414	326	25.6	3.4	2106	313	22.4	3.2	776	192	8.2
0500000US51067	51067	Franklin County, Virginia	23552	452	23552	(X)	17006	536	72.2	2	6431	437	27.3	1.8	13672	525	58.1	2.3	4667	374	19.8	1.6	764	224	3.2	0.9	305	143	1.3	0.6	2570	363	10.9	1.5	1459	285	6.2	1.2	6546	511	27.8	2	5455	486	23.2	2	2399	286	10.2
0500000US51069	51069	Frederick County, Virginia	29146	362	29146	(X)	21763	461	74.7	1.6	10000	460	34.3	1.6	17447	510	59.9	1.8	7511	423	25.8	1.5	1322	223	4.5	0.8	708	200	2.4	0.7	2994	350	10.3	1.2	1781	304	6.1	1	7383	496	25.3	1.6	5592	442	19.2	1.4	2108	256	7.2
0500000US51071	51071	Giles County, Virginia	7126	247	7126	(X)	4912	244	68.9	3.1	1811	186	25.4	2.3	3677	264	51.6	3.7	1319	191	18.5	2.6	306	102	4.3	1.5	119	62	1.7	0.9	929	179	13	2.4	373	93	5.2	1.2	2214	251	31.1	3.1	1935	231	27.2	2.9	901	141	12.6
0500000US51073	51073	Gloucester County, Virginia	13874	383	13874	(X)	10407	461	75	2.7	3909	350	28.2	2.1	8245	426	59.4	2.8	2858	316	20.6	2	603	169	4.3	1.2	320	131	2.3	0.9	1559	296	11.2	2.1	731	236	5.3	1.7	3467	387	25	2.7	2919	363	21	2.6	1387	215	10
0500000US51075	51075	Goochland County, Virginia	7909	258	7909	(X)	6347	274	80.3	2.8	2006	204	25.4	2.3	5587	269	70.6	3.1	1709	172	21.6	2.1	209	91	2.6	1.2	42	41	0.5	0.5	551	157	7	1.9	255	109	3.2	1.3	1562	232	19.7	2.8	1326	214	16.8	2.6	534	108	6.8
0500000US51077	51077	Grayson County, Virginia	6807	318	6807	(X)	4485	309	65.9	3.5	1576	177	23.2	2.3	3577	288	52.5	4	1090	158	16	2.3	316	119	4.6	1.7	147	89	2.2	1.3	592	144	8.7	2	339	110	5	1.6	2322	270	34.1	3.5	2086	259	30.6	3.4	1006	153	14.8
0500000US51079	51079	Greene County, Virginia	6884	233	6884	(X)	4880	298	70.9	4.2	2067	242	30	3.3	3914	251	56.9	3.8	1510	215	21.9	3	304	117	4.4	1.7	135	83	2	1.2	662	199	9.6	2.8	422	170	6.1	2.4	2004	310	29.1	4.2	1621	254	23.5	3.5	313	107	4.5
0500000US51081	51081	Greensville County, Virginia	3310	576	3310	(X)	2489	403	75.2	4.6	936	230	28.3	3.5	1590	305	48	5.6	557	189	16.8	4.1	217	121	6.6	2.9	79	74	2.4	2	682	169	20.6	5.4	300	117	9.1	3.7	821	245	24.8	4.6	717	214	21.7	4.2	429	115	13
0500000US51083	51083	Halifax County, Virginia	14685	408	14685	(X)	9809	419	66.8	2.3	3838	321	26.1	1.9	6747	412	45.9	2.5	2078	257	14.2	1.6	568	178	3.9	1.2	307	123	2.1	0.8	2494	245	17	1.6	1453	191	9.9	1.3	4876	369	33.2	2.3	4522	352	30.8	2.2	2253	238	15.3
0500000US51085	51085	Hanover County, Virginia	36444	451	36444	(X)	27861	534	76.4	1.3	12508	420	34.3	1.1	23289	627	63.9	1.7	10249	418	28.1	1.1	1243	227	3.4	0.6	575	169	1.6	0.5	3329	371	9.1	1	1684	264	4.6	0.7	8583	491	23.6	1.3	7270	471	19.9	1.2	2972	305	8.2
0500000US51087	51087	Henrico County, Virginia	123392	803	123392	(X)	79223	1019	64.2	0.8	38621	949	31.3	0.7	56799	1096	46	0.8	25616	849	20.8	0.7	4960	379	4	0.3	2563	331	2.1	0.3	17464	729	14.2	0.6	10442	726	8.5	0.6	44169	1010	35.8	0.8	36630	1122	29.7	0.9	11899	582	9.6
0500000US51089	51089	Henry County, Virginia	22734	493	22734	(X)	15160	664	66.7	2.6	5363	435	23.6	1.8	10923	517	48	2.2	3215	275	14.1	1.2	951	207	4.2	0.9	280	106	1.2	0.5	3286	389	14.5	1.6	1868	350	8.2	1.5	7574	628	33.3	2.6	6916	596	30.4	2.5	3238	341	14.2
0500000US51091	51091	Highland County, Virginia	1052	89	1052	(X)	772	74	73.4	6.8	129	39	12.3	4.2	632	80	60.1	7.6	105	33	10	3.5	48	30	4.6	2.9	15	19	1.4	1.8	92	51	8.7	4.8	9	15	0.9	1.4	280	83	26.6	6.8	243	74	23.1	6.1	119	48	11.3
0500000US51093	51093	Isle of Wight County, Virginia	13585	249	13585	(X)	10464	323	77	2.1	3784	247	27.9	1.8	8463	342	62.3	2.3	2777	210	20.4	1.6	431	100	3.2	0.7	172	74	1.3	0.5	1570	195	11.6	1.4	835	154	6.1	1.1	3121	302	23	2.1	2829	282	20.8	2	1066	169	7.8
0500000US51095	51095	James City County, Virginia	26579	507	26579	(X)	19135	594	72	2	6819	447	25.7	1.6	15890	627	59.8	2.1	5036	414	18.9	1.5	755	228	2.8	0.8	338	169	1.3	0.6	2490	334	9.4	1.3	1445	273	5.4	1	7444	558	28	2	6228	533	23.4	1.9	2927	343	11
0500000US51097	51097	King and Queen County, Virginia	2924	184	2924	(X)	2053	194	70.2	5	587	135	20.1	3.9	1677	202	57.4	5.9	484	116	16.6	3.6	123	67	4.2	2.3	0	17	0	1.2	253	94	8.7	3.1	103	81	3.5	2.7	871	157	29.8	5	793	153	27.1	5	387	109	13.2
0500000US51099	51099	King George County, Virginia	8166	306	8166	(X)	5996	356	73.4	3.8	3013	249	36.9	2.9	4955	337	60.7	3.6	2227	228	27.3	2.6	280	97	3.4	1.2	174	83	2.1	1	761	165	9.3	2	612	136	7.5	1.7	2170	336	26.6	3.8	1757	261	21.5	3	540	141	6.6
0500000US51101	51101	King William County, Virginia	6035	173	6035	(X)	4482	224	74.3	3.4	2017	192	33.4	3	3596	256	59.6	3.9	1555	205	25.8	3.2	227	115	3.8	1.9	90	69	1.5	1.1	659	151	10.9	2.5	372	128	6.2	2.1	1553	220	25.7	3.4	1385	208	22.9	3.3	534	125	8.8
0500000US51103	51103	Lancaster County, Virginia	5395	272	5395	(X)	3424	240	63.5	3.5	898	174	16.6	2.8	2640	199	48.9	3.9	456	125	8.5	2.3	204	116	3.8	2	180	113	3.3	2	580	129	10.8	2.3	262	108	4.9	1.9	1971	225	36.5	3.5	1820	207	33.7	3.4	1084	152	20.1
0500000US51105	51105	Lee County, Virginia	9841	354	9841	(X)	6745	329	68.5	2.9	2588	223	26.3	2.2	5187	348	52.7	3.3	1861	243	18.9	2.4	700	195	7.1	2	264	122	2.7	1.2	858	193	8.7	2	463	135	4.7	1.4	3096	328	31.5	2.9	2839	325	28.8	2.9	1266	172	12.9
0500000US51107	51107	Loudoun County, Virginia	104195	591	104195	(X)	80849	1081	77.6	0.9	47869	896	45.9	0.8	68060	1124	65.3	1	40675	812	39	0.7	3873	483	3.7	0.5	2118	363	2	0.3	8916	597	8.6	0.6	5076	436	4.9	0.4	23346	982	22.4	0.9	18290	844	17.6	0.8	4113	323	3.9
0500000US51109	51109	Louisa County, Virginia	13023	391	13023	(X)	9427	412	72.4	2.6	3398	321	26.1	2.3	7315	407	56.2	2.8	2333	276	17.9	2	697	187	5.4	1.5	286	134	2.2	1	1415	249	10.9	1.8	779	180	6	1.4	3596	371	27.6	2.6	2918	359	22.4	2.6	1020	188	7.8
0500000US51111	51111	Lunenburg County, Virginia	4601	360	4601	(X)	3130	312	68	4	1108	212	24.1	3.5	2371	273	51.5	4.2	733	189	15.9	3.5	191	73	4.2	1.5	65	40	1.4	0.8	568	120	12.3	2.6	310	102	6.7	2.1	1471	213	32	4	1343	195	29.2	3.7	732	112	15.9
0500000US51113	51113	Madison County, Virginia	5069	192	5069	(X)	3795	282	74.9	4.3	1326	222	26.2	3.9	2956	265	58.3	4.7	1034	207	20.4	3.8	279	115	5.5	2.3	152	88	3	1.7	560	175	11	3.4	140	93	2.8	1.8	1274	214	25.1	4.3	995	180	19.6	3.7	479	129	9.4
0500000US51115	51115	Mathews County, Virginia	3815	269	3815	(X)	2806	244	73.6	5	858	153	22.5	3.4	2149	231	56.3	5.7	581	159	15.2	3.9	235	106	6.2	2.7	93	70	2.4	1.8	422	155	11.1	3.9	184	103	4.8	2.7	1009	220	26.4	5	877	211	23	5	557	157	14.6
0500000US51117	51117	Mecklenburg County, Virginia	12642	410	12642	(X)	7888	332	62.4	2.5	2635	233	20.8	1.6	5651	289	44.7	2.4	1484	210	11.7	1.6	485	175	3.8	1.4	275	122	2.2	0.9	1752	230	13.9	1.8	876	169	6.9	1.3	4754	397	37.6	2.5	4214	358	33.3	2.3	1848	229	14.6
0500000US51119	51119	Middlesex County, Virginia	4393	250	4393	(X)	3107	283	70.7	4.9	834	178	19	3.6	2559	255	58.3	5	575	162	13.1	3.4	184	80	4.2	1.7	87	63	2	1.4	364	106	8.3	2.4	172	74	3.9	1.7	1286	227	29.3	4.9	1194	224	27.2	4.9	649	152	14.8
0500000US51121	51121	Montgomery County, Virginia	34739	723	34739	(X)	19172	445	55.2	1.4	8152	397	23.5	1.1	15569	481	44.8	1.4	6083	448	17.5	1.3	841	195	2.4	0.6	497	165	1.4	0.5	2762	387	8	1.1	1572	286	4.5	0.8	15567	711	44.8	1.4	9395	586	27	1.5	2462	283	7.1
0500000US51125	51125	Nelson County, Virginia	6415	347	6415	(X)	4331	299	67.5	4	1422	232	22.2	3.4	3112	303	48.5	4.3	905	199	14.1	3	239	114	3.7	1.7	18	21	0.3	0.3	980	222	15.3	3.5	499	170	7.8	2.6	2084	303	32.5	4	1808	293	28.2	4.1	851	220	13.3
0500000US51127	51127	New Kent County, Virginia	6719	221	6719	(X)	5061	255	75.3	3	1815	189	27	2.5	4092	268	60.9	3.7	1222	193	18.2	2.7	276	108	4.1	1.6	105	74	1.6	1.1	693	191	10.3	2.8	488	168	7.3	2.5	1658	212	24.7	3	1340	205	19.9	3	551	148	8.2
0500000US51131	51131	Northampton County, Virginia	5025	286	5025	(X)	2880	272	57.3	4.4	922	147	18.3	2.6	2153	249	42.8	4.4	564	117	11.2	2.2	122	67	2.4	1.3	39	31	0.8	0.6	605	117	12	2.3	319	94	6.3	1.8	2145	251	42.7	4.4	1844	216	36.7	4.1	912	132	18.1
0500000US51133	51133	Northumberland County, Virginia	5557	343	5557	(X)	3730	320	67.1	4.1	957	204	17.2	3.2	3101	280	55.8	4.6	670	159	12.1	2.8	98	73	1.8	1.3	13	19	0.2	0.3	531	177	9.6	2.9	274	135	4.9	2.3	1827	255	32.9	4.1	1530	240	27.5	4	793	182	14.3
0500000US51135	51135	Nottoway County, Virginia	5504	230	5504	(X)	3657	277	66.4	4.3	1517	220	27.6	3.6	2511	265	45.6	4.4	984	182	17.9	3	482	147	8.8	2.6	181	87	3.3	1.5	664	158	12.1	2.9	352	132	6.4	2.4	1847	250	33.6	4.3	1683	230	30.6	4	812	130	14.8
0500000US51137	51137	Orange County, Virginia	12617	348	12617	(X)	9418	406	74.6	2.7	3605	260	28.6	2	7365	423	58.4	3.2	2477	229	19.6	1.8	648	190	5.1	1.5	420	164	3.3	1.3	1405	235	11.1	1.8	708	177	5.6	1.4	3199	368	25.4	2.7	2736	298	21.7	2.3	1102	198	8.7
0500000US51139	51139	Page County, Virginia	9469	293	9469	(X)	6676	238	70.5	2.4	2384	206	25.2	1.9	5212	254	55	2.9	1748	183	18.5	1.8	416	136	4.4	1.4	225	102	2.4	1.1	1048	195	11.1	2	411	120	4.3	1.2	2793	279	29.5	2.4	2268	261	24	2.5	1118	166	11.8
0500000US51141	51141	Patrick County, Virginia	7519	328	7519	(X)	4882	307	64.9	3.7	1672	224	22.2	2.8	3859	313	51.3	3.9	1097	190	14.6	2.4	168	74	2.2	1	73	52	1	0.7	855	183	11.4	2.4	502	147	6.7	1.9	2637	328	35.1	3.7	2384	329	31.7	3.7	1186	221	15.8
0500000US51143	51143	Pittsylvania County, Virginia	26249	506	26249	(X)	18483	472	70.4	1.7	6680	380	25.4	1.4	13926	584	53.1	2.3	4587	380	17.5	1.5	1413	227	5.4	0.9	554	152	2.1	0.6	3144	357	12	1.3	1539	249	5.9	0.9	7766	500	29.6	1.7	6843	436	26.1	1.5	3063	254	11.7
0500000US51145	51145	Powhatan County, Virginia	9429	247	9429	(X)	7418	309	78.7	2.9	2946	234	31.2	2.2	6323	303	67.1	3.3	2506	233	26.6	2.3	350	145	3.7	1.5	144	93	1.5	1	745	186	7.9	2	296	123	3.1	1.3	2011	284	21.3	2.9	1706	262	18.1	2.6	653	142	6.9
0500000US51147	51147	Prince Edward County, Virginia	7227	452	7227	(X)	4650	437	64.3	4.2	1810	249	25	2.9	3395	302	47	3.7	1189	171	16.5	2.3	257	135	3.6	1.8	151	93	2.1	1.3	998	229	13.8	2.8	470	159	6.5	2	2577	329	35.7	4.2	2183	293	30.2	4.4	871	160	12.1
0500000US51149	51149	Prince George County, Virginia	10811	340	10811	(X)	8636	356	79.9	2.5	3927	293	36.3	2.6	6855	403	63.4	3.1	2954	266	27.3	2.4	490	159	4.5	1.5	273	128	2.5	1.2	1291	222	11.9	2.1	700	164	6.5	1.5	2175	284	20.1	2.5	2009	289	18.6	2.6	718	131	6.6
0500000US51153	51153	Prince William County, Virginia	129643	853	129643	(X)	100266	1133	77.3	0.7	55164	1178	42.6	0.8	77536	1338	59.8	0.9	42154	1203	32.5	0.9	6783	624	5.2	0.5	3888	609	3	0.5	15947	880	12.3	0.7	9122	735	7	0.6	29377	873	22.7	0.7	22909	783	17.7	0.6	5208	356	4
0500000US51155	51155	Pulaski County, Virginia	14874	453	14874	(X)	9993	521	67.2	2.8	2987	324	20.1	1.9	7609	433	51.2	2.6	2139	274	14.4	1.7	579	169	3.9	1.1	242	114	1.6	0.8	1805	283	12.1	1.9	606	185	4.1	1.2	4881	448	32.8	2.8	4290	433	28.8	2.8	1596	246	10.7
0500000US51157	51157	Rappahannock County, Virginia	3276	185	3276	(X)	2162	183	66	4.4	782	137	23.9	3.7	1861	180	56.8	4.8	630	126	19.2	3.6	119	66	3.6	2	89	55	2.7	1.7	182	84	5.6	2.5	63	54	1.9	1.6	1114	162	34	4.4	907	159	27.7	4.4	401	103	12.2
0500000US51159	51159	Richmond County, Virginia	2754	252	2754	(X)	1753	210	63.7	4.7	653	163	23.7	4.6	1377	170	50	5.4	472	150	17.1	4.7	88	67	3.2	2.3	32	32	1.2	1.2	288	102	10.5	3.2	149	76	5.4	2.6	1001	157	36.3	4.7	875	151	31.8	4.4	581	108	21.1
0500000US51161	51161	Roanoke County, Virginia	37876	406	37876	(X)	26187	592	69.1	1.4	10983	497	29	1.2	21117	680	55.8	1.6	8201	545	21.7	1.4	1528	274	4	0.7	854	264	2.3	0.7	3542	417	9.4	1.1	1928	302	5.1	0.8	11689	556	30.9	1.4	10218	548	27	1.4	4351	334	11.5
0500000US51163	51163	Rockbridge County, Virginia	9093	307	9093	(X)	6206	336	68.3	3.1	1777	236	19.5	2.3	5062	310	55.7	3	1374	184	15.1	1.9	431	111	4.7	1.2	185	79	2	0.9	713	169	7.8	1.8	218	115	2.4	1.2	2887	304	31.7	3.1	2579	295	28.4	3	1273	209	14
0500000US51165	51165	Rockingham County, Virginia	29616	408	29616	(X)	21353	517	72.1	1.3	8592	389	29	1.2	17364	580	58.6	1.7	6577	373	22.2	1.2	1063	200	3.6	0.7	487	144	1.6	0.5	2926	333	9.9	1.1	1528	256	5.2	0.9	8263	395	27.9	1.3	6881	369	23.2	1.2	3021	262	10.2
0500000US51167	51167	Russell County, Virginia	11140	384	11140	(X)	7545	374	67.7	3.2	2367	288	21.2	2.5	5740	423	51.5	3.7	1792	297	16.1	2.6	592	203	5.3	1.8	205	92	1.8	0.8	1213	239	10.9	2.2	370	131	3.3	1.2	3595	415	32.3	3.2	3177	378	28.5	3	1601	242	14.4
0500000US51169	51169	Scott County, Virginia	9610	263	9610	(X)	6783	364	70.6	3.2	2243	237	23.3	2.2	5410	342	56.3	3.3	1777	230	18.5	2.2	407	158	4.2	1.6	119	79	1.2	0.8	966	191	10.1	1.9	347	123	3.6	1.3	2827	322	29.4	3.2	2622	310	27.3	3.1	1393	220	14.5
0500000US51171	51171	Shenandoah County, Virginia	17261	437	17261	(X)	11674	439	67.6	2.4	4383	323	25.4	1.7	9073	430	52.6	2.5	2895	269	16.8	1.5	920	205	5.3	1.2	529	159	3.1	0.9	1681	234	9.7	1.3	959	162	5.6	0.9	5587	468	32.4	2.4	4589	407	26.6	2.1	1953	258	11.3
0500000US51173	51173	Smyth County, Virginia	12567	365	12567	(X)	8545	373	68	2.5	3003	291	23.9	2.1	6273	346	49.9	2.8	1825	217	14.5	1.7	713	190	5.7	1.5	328	123	2.6	1	1559	264	12.4	2	850	216	6.8	1.7	4022	352	32	2.5	3576	335	28.5	2.5	1630	187	13
0500000US51175	51175	Southampton County, Virginia	6532	263	6532	(X)	4707	276	72.1	2.9	1754	215	26.9	3	3376	247	51.7	3	1044	146	16	2.1	269	90	4.1	1.4	165	81	2.5	1.2	1062	163	16.3	2.4	545	138	8.3	2.1	1825	199	27.9	2.9	1549	186	23.7	2.7	654	104	10
0500000US51177	51177	Spotsylvania County, Virginia	41380	545	41380	(X)	33054	604	79.9	1.3	16642	559	40.2	1.3	25585	677	61.8	1.6	11902	609	28.8	1.4	2021	367	4.9	0.9	1344	295	3.2	0.7	5448	509	13.2	1.2	3396	434	8.2	1.1	8326	590	20.1	1.3	6687	497	16.2	1.1	2662	311	6.4
0500000US51179	51179	Stafford County, Virginia	41204	515	41204	(X)	33418	591	81.1	1.2	17506	572	42.5	1.4	27373	636	66.4	1.4	13734	584	33.3	1.4	1847	275	4.5	0.7	1037	222	2.5	0.5	4198	356	10.2	0.8	2735	312	6.6	0.8	7786	516	18.9	1.2	6337	458	15.4	1.1	1861	227	4.5
0500000US51181	51181	Surry County, Virginia	2572	156	2572	(X)	1791	166	69.6	4.8	675	122	26.2	4	1335	165	51.9	5.4	440	103	17.1	3.7	161	78	6.3	3	83	59	3.2	2.3	295	79	11.5	3.1	152	67	5.9	2.5	781	130	30.4	4.8	700	136	27.2	4.9	317	84	12.3
0500000US51183	51183	Sussex County, Virginia	3639	296	3639	(X)	2216	254	60.9	4.4	727	134	20	3.3	1449	209	39.8	4.2	371	86	10.2	2.1	195	85	5.4	2.2	71	57	2	1.5	572	122	15.7	3.5	285	77	7.8	2.2	1423	189	39.1	4.4	1228	177	33.7	4.1	589	116	16.2
0500000US51185	51185	Tazewell County, Virginia	18136	349	18136	(X)	12904	469	71.2	2.4	4745	356	26.2	1.8	10100	517	55.7	2.6	3508	354	19.3	1.8	806	201	4.4	1.1	399	142	2.2	0.8	1998	282	11	1.6	838	173	4.6	1	5232	451	28.8	2.4	4478	438	24.7	2.3	1996	270	11
0500000US51187	51187	Warren County, Virginia	14349	301	14349	(X)	9907	374	69	2.6	4375	383	30.5	2.7	7697	334	53.6	2.5	3267	299	22.8	2.2	654	170	4.6	1.2	275	110	1.9	0.8	1556	248	10.8	1.7	833	206	5.8	1.4	4442	404	31	2.6	3387	343	23.6	2.2	1295	190	9
0500000US51191	51191	Washington County, Virginia	22913	469	22913	(X)	16107	564	70.3	1.9	6118	414	26.7	1.6	12543	529	54.7	2	4302	392	18.8	1.6	1080	244	4.7	1.1	586	207	2.6	0.9	2484	309	10.8	1.3	1230	263	5.4	1.1	6806	441	29.7	1.9	5821	423	25.4	1.8	2336	239	10.2
0500000US51193	51193	Westmoreland County, Virginia	7077	393	7077	(X)	4542	340	64.2	3.7	1244	220	17.6	2.6	3278	286	46.3	3.9	719	164	10.2	2.2	393	153	5.6	2.1	193	130	2.7	1.8	871	196	12.3	2.6	332	130	4.7	1.8	2535	313	35.8	3.7	2175	306	30.7	3.7	946	175	13.4
0500000US51195	51195	Wise County, Virginia	15673	315	15673	(X)	10659	428	68	2.5	4141	317	26.4	1.9	7849	384	50.1	2.4	2820	304	18	1.9	735	174	4.7	1.1	290	115	1.9	0.7	2075	327	13.2	2	1031	205	6.6	1.3	5014	414	32	2.5	4426	400	28.2	2.5	1514	176	9.7
0500000US51197	51197	Wythe County, Virginia	11610	433	11610	(X)	7909	405	68.1	2.5	2650	274	22.8	2.1	5947	368	51.2	2.9	1688	247	14.5	2	500	173	4.3	1.4	171	101	1.5	0.9	1462	235	12.6	2	791	173	6.8	1.5	3701	330	31.9	2.5	3271	321	28.2	2.5	1474	201	12.7
0500000US51199	51199	York County, Virginia	24008	365	24008	(X)	19205	440	80	1.7	9058	386	37.7	1.5	15591	461	64.9	2	7074	367	29.5	1.5	680	181	2.8	0.7	353	132	1.5	0.5	2934	323	12.2	1.3	1631	226	6.8	0.9	4803	420	20	1.7	4120	387	17.2	1.5	1503	215	6.3
0500000US51510	51510	Alexandria city, Virginia	64729	743	64729	(X)	30415	845	47	1.3	12338	602	19.1	1	22758	799	35.2	1.2	8426	521	13	0.8	2120	305	3.3	0.5	887	211	1.4	0.3	5537	471	8.6	0.7	3025	375	4.7	0.6	34314	985	53	1.3	28299	1078	43.7	1.5	4703	368	7.3
0500000US51515	51515	Bedford city, Virginia	2723	164	2723	(X)	1759	168	64.6	6.5	727	144	26.7	5	966	179	35.5	6.7	268	116	9.8	4.3	91	72	3.3	2.7	28	39	1	1.4	702	217	25.8	7.9	431	157	15.8	5.6	964	208	35.4	6.5	886	198	32.5	6.3	315	128	11.6
0500000US51520	51520	Bristol city, Virginia	7757	277	7757	(X)	4849	266	62.5	3.3	1949	203	25.1	2.4	3050	245	39.3	3.2	1012	181	13	2.3	421	143	5.4	1.8	325	127	4.2	1.6	1378	196	17.8	2.6	612	159	7.9	2.1	2908	305	37.5	3.3	2618	298	33.8	3.3	1161	162	15
0500000US51530	51530	Buena Vista city, Virginia	2732	114	2732	(X)	1691	203	61.9	7.1	857	156	31.4	5.5	1118	167	40.9	5.9	465	114	17	4	222	119	8.1	4.4	181	105	6.6	3.8	351	135	12.8	5	211	95	7.7	3.5	1041	202	38.1	7.1	893	176	32.7	6.4	511	146	18.7
0500000US51540	51540	Charlottesville city, Virginia	17319	387	17319	(X)	7261	355	41.9	2	3278	277	18.9	1.5	5140	358	29.7	2.1	2176	238	12.6	1.3	540	127	3.1	0.7	237	110	1.4	0.6	1581	225	9.1	1.3	865	171	5	1	10058	448	58.1	2	6299	504	36.4	2.7	1567	205	9
0500000US51550	51550	Chesapeake city, Virginia	79380	614	79380	(X)	59688	869	75.2	1	27831	788	35.1	1	44582	934	56.2	1.1	19739	817	24.9	1	3603	448	4.5	0.6	1671	355	2.1	0.4	11503	624	14.5	0.8	6421	548	8.1	0.7	19692	847	24.8	1	16557	758	20.9	0.9	5795	403	7.3
0500000US51570	51570	Colonial Heights city, Virginia	7004	198	7004	(X)	4486	223	64	3.2	1738	195	24.8	2.6	3011	221	43	3.4	1027	153	14.7	2.2	433	128	6.2	1.8	238	105	3.4	1.5	1042	176	14.9	2.5	473	134	6.8	1.9	2518	251	36	3.2	2019	257	28.8	3.4	1091	162	15.6
0500000US51580	51580	Covington city, Virginia	2584	118	2584	(X)	1411	152	54.6	5.7	586	109	22.7	4.1	1042	130	40.3	5	399	101	15.4	3.8	98	61	3.8	2.3	48	46	1.9	1.7	271	95	10.5	3.6	139	65	5.4	2.5	1173	166	45.4	5.7	1057	175	40.9	6.3	493	125	19.1
0500000US51590	51590	Danville city, Virginia	18986	480	18986	(X)	11178	405	58.9	2.2	4210	292	22.2	1.5	6757	365	35.6	2	1956	248	10.3	1.3	778	157	4.1	0.8	352	103	1.9	0.5	3643	277	19.2	1.4	1902	251	10	1.3	7808	513	41.1	2.2	7118	544	37.5	2.4	2848	368	15
0500000US51595	51595	Emporia city, Virginia	2486	193	2486	(X)	1402	147	56.4	5.8	596	142	24	5.5	647	122	26	5	203	84	8.2	3.5	211	110	8.5	4.4	56	48	2.3	1.9	544	154	21.9	6.1	337	140	13.6	5.5	1084	189	43.6	5.8	920	181	37	5.5	370	114	14.9
0500000US51600	51600	Fairfax city, Virginia	8519	112	8519	(X)	5854	296	68.7	3.3	2344	236	27.5	2.7	4818	302	56.6	3.4	1956	227	23	2.6	401	140	4.7	1.6	112	69	1.3	0.8	635	141	7.5	1.7	276	119	3.2	1.4	2665	283	31.3	3.3	1773	233	20.8	2.7	594	130	7
0500000US51610	51610	Falls Church city, Virginia	4857	186	4857	(X)	3073	199	63.3	4	1671	154	34.4	3.1	2577	196	53.1	4.1	1326	152	27.3	3.1	119	83	2.5	1.7	104	77	2.1	1.6	377	115	7.8	2.4	241	101	5	2.1	1784	221	36.7	4	1555	224	32	4.3	386	90	7.9
0500000US51620	51620	Franklin city, Virginia	3532	152	3532	(X)	2412	199	68.3	5.8	1000	157	28.3	4.2	1457	161	41.3	4.6	524	118	14.8	3.4	75	55	2.1	1.6	26	36	0.7	1	880	164	24.9	4.6	450	115	12.7	3.1	1120	222	31.7	5.8	1002	207	28.4	5.4	454	115	12.9
0500000US51630	51630	Fredericksburg city, Virginia	9705	376	9705	(X)	4896	305	50.4	3.2	2487	277	25.6	2.8	3065	297	31.6	3	1288	196	13.3	1.9	363	149	3.7	1.5	195	103	2	1.1	1468	262	15.1	2.7	1004	238	10.3	2.5	4809	410	49.6	3.2	3902	335	40.2	3.4	937	171	9.7
0500000US51640	51640	Galax city, Virginia	3354	260	3354	(X)	1775	214	52.9	7.5	757	147	22.6	5	1088	186	32.4	5.8	317	128	9.5	4	94	78	2.8	2.4	58	65	1.7	2	593	178	17.7	5.5	382	139	11.4	4.2	1579	332	47.1	7.5	1366	297	40.7	6.8	590	171	17.6
0500000US51650	51650	Hampton city, Virginia	52547	689	52547	(X)	33622	725	64	1.2	14457	600	27.5	1	22734	687	43.3	1.3	8289	487	15.8	0.9	1949	269	3.7	0.5	876	224	1.7	0.4	8939	651	17	1.2	5292	500	10.1	0.9	18925	721	36	1.2	15960	700	30.4	1.3	4968	390	9.5
0500000US51660	51660	Harrisonburg city, Virginia	15334	400	15334	(X)	7937	415	51.8	2.4	3781	302	24.7	1.9	5845	384	38.1	2.4	2438	305	15.9	2	817	219	5.3	1.4	489	195	3.2	1.3	1275	286	8.3	1.8	854	210	5.6	1.3	7397	430	48.2	2.4	3697	405	24.1	2.6	1200	213	7.8
0500000US51670	51670	Hopewell city, Virginia	8686	325	8686	(X)	5077	348	58.5	3.5	1908	284	22	3.1	2936	263	33.8	3.1	698	189	8	2.1	476	147	5.5	1.6	194	116	2.2	1.3	1665	256	19.2	2.8	1016	228	11.7	2.5	3609	336	41.5	3.5	3107	301	35.8	3.2	1244	200	14.3
0500000US51678	51678	Lexington city, Virginia	1801	856	1801	(X)	923	404	51.2	8.2	364	150	20.2	5.8	766	357	42.5	7.5	245	125	13.6	5.4	0	17	0	1.9	0	17	0	1.9	157	87	8.7	4.3	119	78	6.6	4.1	878	494	48.8	8.2	733	370	40.7	7.3	338	151	18.8
0500000US51680	51680	Lynchburg city, Virginia	28466	494	28466	(X)	15961	515	56.1	1.7	6989	430	24.6	1.4	11132	486	39.1	1.7	4454	387	15.6	1.3	949	221	3.3	0.8	474	170	1.7	0.6	3880	385	13.6	1.3	2061	288	7.2	1	12505	568	43.9	1.7	9988	478	35.1	1.6	3637	306	12.8
0500000US51683	51683	Manassas city, Virginia	12011	288	12011	(X)	8891	418	74	2.8	4708	409	39.2	3.2	6509	388	54.2	3	3325	349	27.7	2.9	766	230	6.4	1.9	395	208	3.3	1.7	1616	298	13.5	2.5	988	253	8.2	2.1	3120	339	26	2.8	2541	321	21.2	2.6	561	123	4.7
0500000US51685	51685	Manassas Park city, Virginia	4277	191	4277	(X)	3249	260	76	4.6	1733	216	40.5	4.4	2312	251	54.1	4.9	1264	187	29.6	4	183	75	4.3	1.7	108	61	2.5	1.4	754	187	17.6	4.3	361	148	8.4	3.4	1028	196	24	4.6	862	187	20.2	4.4	257	67	6
0500000US51690	51690	Martinsville city, Virginia	6005	254	6005	(X)	3433	254	57.2	4	1504	215	25	3.4	2024	253	33.7	4.3	741	172	12.3	2.8	242	90	4	1.5	94	56	1.6	0.9	1167	165	19.4	2.5	669	124	11.1	1.9	2572	284	42.8	4	2245	259	37.4	3.7	901	153	15
0500000US51700	51700	Newport News city, Virginia	69467	753	69467	(X)	43850	868	63.1	1.1	20775	735	29.9	1	28296	743	40.7	1	11555	573	16.6	0.8	3291	451	4.7	0.6	1817	343	2.6	0.5	12263	649	17.7	0.9	7403	542	10.7	0.8	25617	818	36.9	1.1	20881	802	30.1	1.1	6033	375	8.7
0500000US51710	51710	Norfolk city, Virginia	85247	1296	85247	(X)	49451	961	58	0.8	23314	757	27.3	0.7	29626	785	34.8	0.8	12047	591	14.1	0.6	4730	509	5.5	0.6	2166	324	2.5	0.4	15095	560	17.7	0.6	9101	515	10.7	0.6	35796	923	42	0.8	28063	886	32.9	0.9	7515	425	8.8
0500000US51720	51720	Norton city, Virginia	1701	165	1701	(X)	959	112	56.4	7	441	83	25.9	5.6	635	133	37.3	7.6	245	79	14.4	4.9	75	75	4.4	4.4	38	45	2.2	2.6	249	77	14.6	4.9	158	72	9.3	4.4	742	167	43.6	7	588	165	34.6	8	191	78	11.2
0500000US51730	51730	Petersburg city, Virginia	12236	415	12236	(X)	7180	364	58.7	2.6	2339	279	19.1	2.1	3298	314	27	2.6	642	145	5.2	1.2	440	123	3.6	1	85	56	0.7	0.5	3442	326	28.1	2.4	1612	252	13.2	1.9	5056	393	41.3	2.6	4206	347	34.4	2.5	1582	208	12.9
0500000US51735	51735	Poquoson city, Virginia	4592	104	4592	(X)	3623	165	78.9	3.6	1510	153	32.9	3.4	2982	170	64.9	3.8	1141	148	24.8	3.3	225	76	4.9	1.7	90	51	2	1.1	416	125	9.1	2.7	279	113	6.1	2.4	969	171	21.1	3.6	869	162	18.9	3.4	426	110	9.3
0500000US51740	51740	Portsmouth city, Virginia	36788	731	36788	(X)	23716	664	64.5	1.4	10095	532	27.4	1.3	13581	588	36.9	1.5	4577	390	12.4	1.1	2116	342	5.8	0.9	1087	288	3	0.8	8019	474	21.8	1.3	4431	414	12	1.1	13072	609	35.5	1.4	11057	634	30.1	1.6	3763	302	10.2
0500000US51750	51750	Radford city, Virginia	5624	326	5624	(X)	2551	221	45.4	3.9	1097	167	19.5	3	1693	206	30.1	3.6	510	125	9.1	2.2	155	79	2.8	1.4	70	55	1.2	1	703	124	12.5	2.3	517	119	9.2	2.2	3073	330	54.6	3.9	1988	298	35.3	5	534	130	9.5
0500000US51760	51760	Richmond city, Virginia	83775	886	83775	(X)	39608	945	47.3	1.1	17749	703	21.2	0.8	20332	733	24.3	0.8	7179	507	8.6	0.6	3641	406	4.3	0.5	1348	254	1.6	0.3	15635	659	18.7	0.8	9222	540	11	0.7	44167	1045	52.7	1.1	33995	1096	40.6	1.3	8838	483	10.5
0500000US51770	51770	Roanoke city, Virginia	42644	589	42644	(X)	23279	821	54.6	1.7	9354	547	21.9	1.2	13715	653	32.2	1.4	4478	414	10.5	0.9	1800	334	4.2	0.8	638	177	1.5	0.4	7764	504	18.2	1.2	4238	398	9.9	0.9	19365	746	45.4	1.7	16619	790	39	1.8	5449	389	12.8
0500000US51775	51775	Salem city, Virginia	9953	273	9953	(X)	6113	333	61.4	2.8	2564	234	25.8	2	4472	346	44.9	3.2	1742	216	17.5	2	396	130	4	1.3	178	99	1.8	1	1245	236	12.5	2.3	644	186	6.5	1.8	3840	292	38.6	2.8	3096	276	31.1	2.7	1170	180	11.8
0500000US51790	51790	Staunton city, Virginia	10613	277	10613	(X)	6121	284	57.7	2.7	2386	239	22.5	2.2	4410	292	41.6	2.7	1507	217	14.2	2	337	116	3.2	1.1	126	66	1.2	0.6	1374	206	12.9	1.9	753	168	7.1	1.6	4492	341	42.3	2.7	3952	322	37.2	2.7	1689	199	15.9
0500000US51800	51800	Suffolk city, Virginia	30502	400	30502	(X)	22545	573	73.9	1.5	10637	408	34.9	1.2	16388	653	53.7	2	7025	425	23	1.3	1397	280	4.6	0.9	858	222	2.8	0.7	4760	405	15.6	1.3	2754	296	9	1	7957	467	26.1	1.5	6864	432	22.5	1.4	2407	230	7.9
0500000US51810	51810	Virginia Beach city, Virginia	164226	1149	164226	(X)	112794	1127	68.7	0.6	53457	1124	32.6	0.6	84194	1185	51.3	0.7	36297	1044	22.1	0.6	6154	490	3.7	0.3	2982	393	1.8	0.2	22446	1001	13.7	0.6	14178	758	8.6	0.5	51432	1179	31.3	0.6	39223	1008	23.9	0.6	12160	566	7.4
0500000US51820	51820	Waynesboro city, Virginia	8734	276	8734	(X)	5536	293	63.4	3.1	2503	232	28.7	2.6	3827	313	43.8	3.3	1415	226	16.2	2.5	412	163	4.7	1.9	269	138	3.1	1.6	1297	226	14.9	2.6	819	201	9.4	2.3	3198	310	36.6	3.1	2613	279	29.9	2.9	1351	204	15.5
0500000US51830	51830	Williamsburg city, Virginia	4281	335	4281	(X)	2293	209	53.6	4.2	674	137	15.7	3.1	1775	171	41.5	3.4	390	110	9.1	2.6	133	52	3.1	1.2	49	37	1.1	0.9	385	124	9	2.9	235	108	5.5	2.5	1988	277	46.4	4.2	1511	195	35.3	3.8	501	105	11.7
0500000US51840	51840	Winchester city, Virginia	10454	327	10454	(X)	5852	344	56	2.9	2679	285	25.6	2.6	3873	286	37	2.8	1410	220	13.5	2.1	495	144	4.7	1.4	358	134	3.4	1.3	1484	227	14.2	2	911	206	8.7	1.9	4602	344	44	2.9	3619	363	34.6	3.1	1210	175	11.6
0500000US54001	54001	Barbour County, West Virginia	6206	221	6206	(X)	4365	245	70.3	3	1431	176	23.1	2.5	3469	210	55.9	3.1	1033	154	16.6	2.3	278	99	4.5	1.6	150	75	2.4	1.2	618	134	10	2.1	248	82	4	1.3	1841	192	29.7	3	1703	185	27.4	2.9	829	114	13.4
0500000US54003	54003	Berkeley County, West Virginia	39992	605	39992	(X)	28044	759	70.1	1.9	12342	594	30.9	1.4	20803	770	52	1.9	7923	534	19.8	1.3	2175	376	5.4	0.9	1289	315	3.2	0.8	5066	552	12.7	1.4	3130	482	7.8	1.2	11948	830	29.9	1.9	10025	764	25.1	1.8	2938	336	7.3
0500000US54005	54005	Boone County, West Virginia	9755	228	9755	(X)	7017	320	71.9	2.9	2777	218	28.5	2.1	5521	333	56.6	3.3	2178	203	22.3	2	455	143	4.7	1.4	144	61	1.5	0.6	1041	186	10.7	1.9	455	118	4.7	1.2	2738	289	28.1	2.9	2443	268	25	2.7	1070	184	11
0500000US54007	54007	Braxton County, West Virginia	6009	237	6009	(X)	3823	207	63.6	3.8	1148	155	19.1	2.6	3127	216	52	4	846	132	14.1	2.2	280	106	4.7	1.8	160	93	2.7	1.6	416	114	6.9	1.9	142	64	2.4	1.1	2186	276	36.4	3.8	1849	241	30.8	3.4	841	133	14
0500000US54009	54009	Brooke County, West Virginia	9911	245	9911	(X)	6592	253	66.5	2.6	2286	221	23.1	2.2	4846	293	48.9	2.9	1476	190	14.9	1.9	619	150	6.2	1.5	235	83	2.4	0.8	1127	218	11.4	2.2	575	156	5.8	1.6	3319	292	33.5	2.6	2926	266	29.5	2.4	1390	194	14
0500000US54011	54011	Cabell County, West Virginia	40484	589	40484	(X)	24544	643	60.6	1.5	9927	518	24.5	1.2	17552	639	43.4	1.6	6010	437	14.8	1.1	1620	286	4	0.7	831	205	2.1	0.5	5372	441	13.3	1	3086	419	7.6	1	15940	661	39.4	1.5	13196	581	32.6	1.4	4754	372	11.7
0500000US54013	54013	Calhoun County, West Virginia	3182	164	3182	(X)	2136	166	67.1	4.2	754	137	23.7	4	1552	175	48.8	5	451	120	14.2	3.6	274	96	8.6	3	116	68	3.6	2.1	310	83	9.7	2.6	187	79	5.9	2.5	1046	147	32.9	4.2	946	138	29.7	4.1	478	104	15
0500000US54015	54015	Clay County, West Virginia	3441	183	3441	(X)	2442	194	71	4.9	950	141	27.6	3.9	2036	193	59.2	5.3	762	151	22.1	4.2	132	66	3.8	1.9	48	40	1.4	1.2	274	97	8	2.8	140	76	4.1	2.2	999	188	29	4.9	895	176	26	4.7	467	119	13.6
0500000US54017	54017	Doddridge County, West Virginia	2773	218	2773	(X)	1958	228	70.6	5.4	681	160	24.6	4.7	1405	186	50.7	5.6	398	98	14.4	3.2	196	93	7.1	3.2	121	78	4.4	2.7	357	99	12.9	3.4	162	78	5.8	2.7	815	156	29.4	5.4	715	143	25.8	5.1	396	87	14.3
0500000US54019	54019	Fayette County, West Virginia	17733	413	17733	(X)	11917	454	67.2	2	4322	337	24.4	1.7	8678	423	48.9	2.1	2835	286	16	1.5	819	151	4.6	0.8	391	108	2.2	0.6	2420	298	13.6	1.7	1096	210	6.2	1.2	5816	369	32.8	2	5057	369	28.5	2	2351	251	13.3
0500000US54021	54021	Gilmer County, West Virginia	2539	367	2539	(X)	1567	185	61.7	5.4	504	94	19.9	2.9	1205	198	47.5	4.8	352	88	13.9	2.7	92	43	3.6	1.7	37	30	1.5	1.1	270	85	10.6	3.9	115	47	4.5	1.9	972	245	38.3	5.4	784	193	30.9	4.8	381	100	15
0500000US54023	54023	Grant County, West Virginia	4673	219	4673	(X)	3242	260	69.4	4.2	1254	147	26.8	2.7	2686	228	57.5	4.1	949	122	20.3	2.4	196	87	4.2	1.8	114	77	2.4	1.6	360	102	7.7	2.1	191	73	4.1	1.5	1431	199	30.6	4.2	1260	183	27	3.8	691	141	14.8
0500000US54025	54025	Greenbrier County, West Virginia	15397	377	15397	(X)	10077	381	65.4	2	3712	325	24.1	2	7484	368	48.6	2.2	2502	226	16.2	1.4	761	183	4.9	1.2	217	102	1.4	0.7	1832	224	11.9	1.4	993	191	6.4	1.2	5320	336	34.6	2	4513	297	29.3	1.9	2136	208	13.9
0500000US54027	54027	Hampshire County, West Virginia	10563	325	10563	(X)	5017	328	47.5	2.9	1821	234	17.2	2.1	3824	298	36.2	2.8	1129	166	10.7	1.6	218	102	2.1	1	92	69	0.9	0.7	975	206	9.2	1.9	600	156	5.7	1.4	5546	371	52.5	2.9	5159	387	48.8	3.2	1552	212	14.7
0500000US54029	54029	Hancock County, West Virginia	12989	254	12989	(X)	8706	383	67	2.7	3246	258	25	1.9	6482	357	49.9	2.8	2149	242	16.5	1.8	703	192	5.4	1.4	355	138	2.7	1.1	1521	250	11.7	1.9	742	176	5.7	1.3	4283	364	33	2.7	3851	310	29.6	2.3	1822	212	14
0500000US54031	54031	Hardy County, West Virginia	4764	268	4764	(X)	2856	252	59.9	4.1	777	156	16.3	3	2332	222	49	4.3	501	127	10.5	2.6	260	104	5.5	2.1	136	58	2.9	1.2	264	103	5.5	2.1	140	69	2.9	1.4	1908	224	40.1	4.1	1725	202	36.2	3.8	663	120	13.9
0500000US54033	54033	Harrison County, West Virginia	27761	388	27761	(X)	18789	506	67.7	1.6	7585	450	27.3	1.5	14052	526	50.6	1.8	5069	414	18.3	1.4	976	168	3.5	0.6	505	137	1.8	0.5	3761	378	13.5	1.4	2011	288	7.2	1	8972	470	32.3	1.6	7893	450	28.4	1.5	3409	284	12.3
0500000US54035	54035	Jackson County, West Virginia	11399	255	11399	(X)	7796	393	68.4	3.2	3101	297	27.2	2.5	6153	391	54	3.3	2158	228	18.9	1.9	436	141	3.8	1.2	245	123	2.1	1.1	1207	235	10.6	2.1	698	218	6.1	1.9	3603	376	31.6	3.2	2975	336	26.1	2.9	1390	205	12.2
0500000US54037	54037	Jefferson County, West Virginia	19824	359	19824	(X)	13939	464	70.3	2.1	5732	336	28.9	1.5	11136	507	56.2	2.4	4341	333	21.9	1.6	795	191	4	1	289	114	1.5	0.6	2008	298	10.1	1.5	1102	198	5.6	1	5885	453	29.7	2.1	4486	456	22.6	2.2	1664	239	8.4
0500000US54039	54039	Kanawha County, West Virginia	82961	773	82961	(X)	50690	736	61.1	0.9	18893	690	22.8	0.8	37207	926	44.8	1.1	11989	599	14.5	0.7	3317	418	4	0.5	1599	322	1.9	0.4	10166	603	12.3	0.7	5305	474	6.4	0.6	32271	897	38.9	0.9	27777	929	33.5	1	10637	576	12.8
0500000US54041	54041	Lewis County, West Virginia	6570	191	6570	(X)	4294	254	65.4	3.4	1459	172	22.2	2.4	3421	258	52.1	3.6	922	162	14	2.3	247	91	3.8	1.4	82	50	1.2	0.8	626	129	9.5	2	455	114	6.9	1.7	2276	232	34.6	3.4	1929	221	29.4	3.3	863	142	13.1
0500000US54043	54043	Lincoln County, West Virginia	8500	262	8500	(X)	6269	327	73.8	3.2	2631	266	31	2.9	4682	321	55.1	3.6	1768	256	20.8	2.9	446	167	5.2	1.9	255	143	3	1.7	1141	192	13.4	2.2	608	183	7.2	2.1	2231	287	26.2	3.2	2051	264	24.1	3	886	169	10.4
0500000US54045	54045	Logan County, West Virginia	14802	267	14802	(X)	10532	434	71.2	2.6	3856	309	26.1	2	7887	508	53.3	3.2	2884	274	19.5	1.7	837	223	5.7	1.5	303	149	2	1	1808	232	12.2	1.6	669	165	4.5	1.1	4270	382	28.8	2.6	3561	359	24.1	2.4	1631	210	11
0500000US54047	54047	McDowell County, West Virginia	8348	271	8348	(X)	5504	324	65.9	3.2	1770	196	21.2	2.1	4012	292	48.1	3.1	1128	166	13.5	1.8	445	89	5.3	1.1	168	56	2	0.7	1047	179	12.5	2.1	474	118	5.7	1.4	2844	281	34.1	3.2	2473	253	29.6	2.9	1132	145	13.6
0500000US54049	54049	Marion County, West Virginia	22761	414	22761	(X)	14940	408	65.6	1.5	5729	301	25.2	1.3	11175	437	49.1	1.7	3799	292	16.7	1.2	983	156	4.3	0.7	506	123	2.2	0.5	2782	302	12.2	1.3	1424	195	6.3	0.9	7821	380	34.4	1.5	6513	425	28.6	1.8	3034	280	13.3
0500000US54051	54051	Marshall County, West Virginia	14068	292	14068	(X)	9468	432	67.3	2.4	3495	318	24.8	2	7392	384	52.5	2.5	2337	271	16.6	1.9	723	189	5.1	1.3	476	169	3.4	1.2	1353	240	9.6	1.7	682	152	4.8	1.1	4600	319	32.7	2.4	3996	342	28.4	2.5	1867	258	13.3
0500000US54053	54053	Mason County, West Virginia	10381	349	10381	(X)	7088	388	68.3	3	2629	248	25.3	2	5485	342	52.8	3	1793	225	17.3	2.1	292	105	2.8	1	145	79	1.4	0.8	1311	227	12.6	2	691	187	6.7	1.7	3293	329	31.7	3	2764	304	26.6	2.8	1271	212	12.2
0500000US54055	54055	Mercer County, West Virginia	25784	439	25784	(X)	16394	601	63.6	2.1	5928	436	23	1.6	12877	587	49.9	2.1	4099	414	15.9	1.6	894	177	3.5	0.7	487	143	1.9	0.6	2623	304	10.2	1.2	1342	239	5.2	0.9	9390	582	36.4	2.1	8114	585	31.5	2.2	3531	295	13.7
0500000US54057	54057	Mineral County, West Virginia	11183	312	11183	(X)	6499	409	58.1	3.4	2284	264	20.4	2.2	5104	334	45.6	2.9	1441	195	12.9	1.7	319	102	2.9	0.9	113	62	1	0.5	1076	236	9.6	2.1	730	201	6.5	1.8	4684	410	41.9	3.4	4402	398	39.4	3.3	1974	229	17.7
0500000US54059	54059	Mingo County, West Virginia	10873	278	10873	(X)	7378	337	67.9	2.7	2519	217	23.2	1.9	5450	316	50.1	2.8	1798	201	16.5	1.8	539	149	5	1.4	156	88	1.4	0.8	1389	238	12.8	2.2	565	140	5.2	1.3	3495	308	32.1	2.7	3140	288	28.9	2.5	1142	174	10.5
0500000US54061	54061	Monongalia County, West Virginia	35777	683	35777	(X)	18516	598	51.8	1.5	7251	399	20.3	1.1	14787	520	41.3	1.4	5296	327	14.8	0.9	1165	233	3.3	0.6	575	143	1.6	0.4	2564	290	7.2	0.8	1380	220	3.9	0.6	17261	659	48.2	1.5	13255	692	37	1.8	2486	242	6.9
0500000US54063	54063	Monroe County, West Virginia	5614	285	5614	(X)	3933	305	70.1	4.2	1168	188	20.8	2.9	3183	262	56.7	3.8	901	162	16	2.7	213	70	3.8	1.2	99	63	1.8	1.1	537	136	9.6	2.4	168	77	3	1.3	1681	252	29.9	4.2	1406	236	25	4.2	553	117	9.9
0500000US54065	54065	Morgan County, West Virginia	7306	227	7306	(X)	3695	291	50.6	4.1	1229	200	16.8	2.6	2967	275	40.6	4	891	177	12.2	2.4	173	82	2.4	1.1	81	61	1.1	0.8	555	156	7.6	2.1	257	115	3.5	1.6	3611	352	49.4	4.1	3345	343	45.8	4.1	1264	162	17.3
0500000US54067	54067	Nicholas County, West Virginia	10366	285	10366	(X)	7645	344	73.8	2.6	2478	273	23.9	2.4	6121	320	59	2.8	1932	255	18.6	2.3	607	168	5.9	1.6	236	117	2.3	1.1	917	210	8.8	2	310	118	3	1.1	2721	276	26.2	2.6	2434	261	23.5	2.5	1225	183	11.8
0500000US54069	54069	Ohio County, West Virginia	18508	347	18508	(X)	10798	397	58.3	2.3	4068	294	22	1.6	8210	422	44.4	2.3	2733	276	14.8	1.5	516	111	2.8	0.6	300	88	1.6	0.5	2072	255	11.2	1.4	1035	183	5.6	1	7710	492	41.7	2.3	6883	437	37.2	2.1	2805	238	15.2
0500000US54071	54071	Pendleton County, West Virginia	3355	185	3355	(X)	2107	190	62.8	4.2	670	113	20	2.9	1738	178	51.8	4.3	506	98	15.1	2.7	110	54	3.3	1.6	38	38	1.1	1.1	259	80	7.7	2.3	126	61	3.8	1.8	1248	150	37.2	4.2	1102	145	32.8	4.1	596	114	17.8
0500000US54073	54073	Pleasants County, West Virginia	2726	129	2726	(X)	1842	144	67.6	4.4	643	92	23.6	3.1	1547	141	56.7	4.8	477	76	17.5	2.7	68	55	2.5	2	41	43	1.5	1.6	227	69	8.3	2.5	125	57	4.6	2.1	884	130	32.4	4.4	761	120	27.9	4.3	387	83	14.2
0500000US54075	54075	Pocahontas County, West Virginia	3783	197	3783	(X)	2545	222	67.3	4.5	914	162	24.2	3.7	2110	190	55.8	4.3	639	133	16.9	3.3	173	73	4.6	1.9	107	59	2.8	1.5	262	85	6.9	2.2	168	77	4.4	2	1238	180	32.7	4.5	1072	176	28.3	4.4	516	120	13.6
0500000US54077	54077	Preston County, West Virginia	12780	270	12780	(X)	8891	357	69.6	2.3	3286	272	25.7	2	7262	308	56.8	2.2	2499	219	19.6	1.7	593	156	4.6	1.2	246	102	1.9	0.8	1036	191	8.1	1.5	541	146	4.2	1.1	3889	295	30.4	2.3	3215	271	25.2	2.1	1378	179	10.8
0500000US54079	54079	Putnam County, West Virginia	21130	334	21130	(X)	15814	500	74.8	1.9	6732	386	31.9	1.8	12867	472	60.9	2	5133	337	24.3	1.6	759	182	3.6	0.9	278	98	1.3	0.5	2188	268	10.4	1.2	1321	258	6.3	1.2	5316	403	25.2	1.9	4496	367	21.3	1.7	1682	228	8
0500000US54081	54081	Raleigh County, West Virginia	31500	542	31500	(X)	20767	693	65.9	1.8	8221	426	26.1	1.2	15927	697	50.6	2	5636	412	17.9	1.2	1382	290	4.4	0.9	739	228	2.3	0.7	3458	390	11	1.2	1846	296	5.9	0.9	10733	587	34.1	1.8	9318	569	29.6	1.8	4216	357	13.4
0500000US54083	54083	Randolph County, West Virginia	11238	356	11238	(X)	7576	379	67.4	2.7	2651	281	23.6	2.4	6024	327	53.6	2.4	1827	254	16.3	2.2	479	120	4.3	1	199	68	1.8	0.6	1073	183	9.5	1.6	625	157	5.6	1.4	3662	333	32.6	2.7	3455	312	30.7	2.6	1287	170	11.5
0500000US54085	54085	Ritchie County, West Virginia	4120	186	4120	(X)	2702	198	65.6	3.8	978	120	23.7	2.7	2082	183	50.5	3.9	648	104	15.7	2.5	189	54	4.6	1.3	60	27	1.5	0.7	431	91	10.5	2.2	270	71	6.6	1.6	1418	170	34.4	3.8	1315	168	31.9	3.8	483	82	11.7
0500000US54087	54087	Roane County, West Virginia	5817	215	5817	(X)	3746	215	64.4	3.4	1186	148	20.4	2.5	3042	227	52.3	3.8	908	146	15.6	2.6	134	73	2.3	1.3	49	50	0.8	0.9	570	169	9.8	2.9	229	109	3.9	1.9	2071	223	35.6	3.4	1777	206	30.5	3.2	920	131	15.8
0500000US54089	54089	Summers County, West Virginia	5270	274	5270	(X)	3490	235	66.2	3.6	1054	177	20	3	2763	269	52.4	4.4	770	149	14.6	2.6	305	99	5.8	1.9	181	73	3.4	1.4	422	129	8	2.5	103	57	2	1.1	1780	229	33.8	3.6	1653	208	31.4	3.3	795	136	15.1
0500000US54091	54091	Taylor County, West Virginia	6800	212	6800	(X)	4952	256	72.8	3.3	1807	202	26.6	2.8	3827	239	56.3	3.3	1346	182	19.8	2.5	256	97	3.8	1.4	79	60	1.2	0.9	869	152	12.8	2.2	382	121	5.6	1.8	1848	237	27.2	3.3	1623	240	23.9	3.3	734	147	10.8
0500000US54093	54093	Tucker County, West Virginia	3129	150	3129	(X)	2156	167	68.9	4	704	114	22.5	3.3	1788	163	57.1	4.7	558	107	17.8	3.2	130	65	4.2	2	61	45	1.9	1.4	238	73	7.6	2.3	85	40	2.7	1.3	973	132	31.1	4	874	125	27.9	3.8	477	99	15.2
0500000US54095	54095	Tyler County, West Virginia	3635	162	3635	(X)	2553	166	70.2	3.5	806	96	22.2	2.1	2065	163	56.8	3.6	582	101	16	2.5	166	67	4.6	1.9	96	56	2.6	1.5	322	80	8.9	2.2	128	47	3.5	1.2	1082	140	29.8	3.5	957	118	26.3	3	545	82	15
0500000US54097	54097	Upshur County, West Virginia	9084	320	9084	(X)	6320	326	69.6	2.8	2423	229	26.7	2.1	5076	337	55.9	2.8	1815	224	20	2.1	376	117	4.1	1.3	183	83	2	0.9	868	147	9.6	1.6	425	123	4.7	1.4	2764	275	30.4	2.8	2355	262	25.9	2.7	1068	172	11.8
0500000US54099	54099	Wayne County, West Virginia	16783	291	16783	(X)	11153	452	66.5	2.3	4102	304	24.4	1.7	8590	461	51.2	2.5	2846	304	17	1.7	594	155	3.5	0.9	275	103	1.6	0.6	1969	250	11.7	1.5	981	176	5.8	1.1	5630	395	33.5	2.3	4931	389	29.4	2.3	2125	211	12.7
0500000US54101	54101	Webster County, West Virginia	4115	200	4115	(X)	2904	198	70.6	4.3	1108	145	26.9	3	2302	194	55.9	4.6	779	134	18.9	3.1	203	86	4.9	2.1	95	55	2.3	1.3	399	99	9.7	2.4	234	83	5.7	2	1211	196	29.4	4.3	1024	189	24.9	4.2	443	109	10.8
0500000US54103	54103	Wetzel County, West Virginia	6980	248	6980	(X)	4727	255	67.7	3.1	1595	191	22.9	2.4	3809	248	54.6	3.6	1132	143	16.2	1.9	200	74	2.9	1	106	55	1.5	0.8	718	145	10.3	2	357	106	5.1	1.5	2253	244	32.3	3.1	2040	236	29.2	3.1	1013	135	14.5
0500000US54105	54105	Wirt County, West Virginia	2303	165	2303	(X)	1559	192	67.7	6.4	536	145	23.3	5.3	1282	169	55.7	6.8	406	123	17.6	4.9	42	31	1.8	1.3	18	21	0.8	0.9	235	97	10.2	3.9	112	76	4.9	3.1	744	152	32.3	6.4	548	139	23.8	6	274	87	11.9
0500000US54107	54107	Wood County, West Virginia	35783	465	35783	(X)	23574	562	65.9	1.5	9155	477	25.6	1.3	18319	614	51.2	1.7	6287	449	17.6	1.2	1409	257	3.9	0.7	662	170	1.9	0.5	3846	344	10.7	0.9	2206	312	6.2	0.9	12209	580	34.1	1.5	10496	500	29.3	1.3	4605	310	12.9
0500000US54109	54109	Wyoming County, West Virginia	9146	263	9146	(X)	6683	350	73.1	3.1	2464	214	26.9	2.2	5305	314	58	3.2	1921	182	21	2	412	110	4.5	1.2	115	64	1.3	0.7	966	188	10.6	2	428	111	4.7	1.2	2463	291	26.9	3.1	2207	265	24.1	2.9	1078	182	11.8
[truncated: 549 more columns]
