# Supplementary material for: Evaluation of Policy Effectiveness by Mathematical Modeling for the Opioid Crisis with Spatial Study and Trend Analysis
Source: Healthcare (Basel). 2021 May 14;9(5):585. doi: 10.3390/healthcare9050585 (PMC8155830; doi:10.3390/healthcare9050585)
Supplement: Supplementary file 1 [file healthcare-09-00585-s001.zip › Table S5.xlsx]

## Sheet: Table S5
GEO.id	GEO.id2	GEO.display-label	HC01_VC03	HC02_VC03	HC03_VC03	HC04_VC03	HC01_VC04	HC02_VC04	HC03_VC04	HC04_VC04	HC01_VC05	HC02_VC05	HC03_VC05	HC04_VC05	HC01_VC06	HC02_VC06	HC03_VC06	HC04_VC06	HC01_VC07	HC02_VC07	HC03_VC07	HC04_VC07	HC01_VC08	HC02_VC08	HC03_VC08	HC04_VC08	HC01_VC09	HC02_VC09	HC03_VC09	HC04_VC09	HC01_VC10	HC02_VC10	HC03_VC10	HC04_VC10	HC01_VC11	HC02_VC11	HC03_VC11	HC04_VC11	HC01_VC12	HC02_VC12	HC03_VC12	HC04_VC12	HC01_VC13	HC02_VC13	HC03_VC13	HC04_VC13	HC01_VC14	HC02_VC14	HC03_VC14
Id	Id2	Geography	Estimate; HOUSEHOLDS BY TYPE - Total households	Margin of Error; HOUSEHOLDS BY TYPE - Total households	Percent; HOUSEHOLDS BY TYPE - Total households	Percent Margin of Error; HOUSEHOLDS BY TYPE - Total households	Estimate; HOUSEHOLDS BY TYPE - Total households - Family households (families)	Margin of Error; HOUSEHOLDS BY TYPE - Total households - Family households (families)	Percent; HOUSEHOLDS BY TYPE - Total households - Family households (families)	Percent Margin of Error; HOUSEHOLDS BY TYPE - Total households - Family households (families)	Estimate; HOUSEHOLDS BY TYPE - Total households - Family households (families) - With own children under 18 years	Margin of Error; HOUSEHOLDS BY TYPE - Total households - Family households (families) - With own children under 18 years	Percent; HOUSEHOLDS BY TYPE - Total households - Family households (families) - With own children under 18 years	Percent Margin of Error; HOUSEHOLDS BY TYPE - Total households - Family households (families) - With own children under 18 years	Estimate; HOUSEHOLDS BY TYPE - Total households - Family households (families) - Married-couple family	Margin of Error; HOUSEHOLDS BY TYPE - Total households - Family households (families) - Married-couple family	Percent; HOUSEHOLDS BY TYPE - Total households - Family households (families) - Married-couple family	Percent Margin of Error; HOUSEHOLDS BY TYPE - Total households - Family households (families) - Married-couple family	Estimate; HOUSEHOLDS BY TYPE - Total households - Family households (families) - Married-couple family - With own children under 18 years	Margin of Error; HOUSEHOLDS BY TYPE - Total households - Family households (families) - Married-couple family - With own children under 18 years	Percent; HOUSEHOLDS BY TYPE - Total households - Family households (families) - Married-couple family - With own children under 18 years	Percent Margin of Error; HOUSEHOLDS BY TYPE - Total households - Family households (families) - Married-couple family - With own children under 18 years	Estimate; HOUSEHOLDS BY TYPE - Total households - Family households (families) - Male householder, no wife present, family	Margin of Error; HOUSEHOLDS BY TYPE - Total households - Family households (families) - Male householder, no wife present, family	Percent; HOUSEHOLDS BY TYPE - Total households - Family households (families) - Male householder, no wife present, family	Percent Margin of Error; HOUSEHOLDS BY TYPE - Total households - Family households (families) - Male householder, no wife present, family	Estimate; HOUSEHOLDS BY TYPE - Total households - Family households (families) - Male householder, no wife present, family - With own children under 18 years	Margin of Error; HOUSEHOLDS BY TYPE - Total households - Family households (families) - Male householder, no wife present, family - With own children under 18 years	Percent; HOUSEHOLDS BY TYPE - Total households - Family households (families) - Male householder, no wife present, family - With own children under 18 years	Percent Margin of Error; HOUSEHOLDS BY TYPE - Total households - Family households (families) - Male householder, no wife present, family - With own children under 18 years	Estimate; HOUSEHOLDS BY TYPE - Total households - Family households (families) - Female householder, no husband present, family	Margin of Error; HOUSEHOLDS BY TYPE - Total households - Family households (families) - Female householder, no husband present, family	Percent; HOUSEHOLDS BY TYPE - Total households - Family households (families) - Female householder, no husband present, family	Percent Margin of Error; HOUSEHOLDS BY TYPE - Total households - Family households (families) - Female householder, no husband present, family	Estimate; HOUSEHOLDS BY TYPE - Total households - Family households (families) - Female householder, no husband present, family - With own children under 18 years	Margin of Error; HOUSEHOLDS BY TYPE - Total households - Family households (families) - Female householder, no husband present, family - With own children under 18 years	Percent; HOUSEHOLDS BY TYPE - Total households - Family households (families) - Female householder, no husband present, family - With own children under 18 years	Percent Margin of Error; HOUSEHOLDS BY TYPE - Total households - Family households (families) - Female householder, no husband present, family - With own children under 18 years	Estimate; HOUSEHOLDS BY TYPE - Total households - Nonfamily households	Margin of Error; HOUSEHOLDS BY TYPE - Total households - Nonfamily households	Percent; HOUSEHOLDS BY TYPE - Total households - Nonfamily households	Percent Margin of Error; HOUSEHOLDS BY TYPE - Total households - Nonfamily households	Estimate; HOUSEHOLDS BY TYPE - Total households - Nonfamily households - Householder living alone	Margin of Error; HOUSEHOLDS BY TYPE - Total households - Nonfamily households - Householder living alone	Percent; HOUSEHOLDS BY TYPE - Total households - Nonfamily households - Householder living alone	Percent Margin of Error; HOUSEHOLDS BY TYPE - Total households - Nonfamily households - Householder living alone	Estimate; HOUSEHOLDS BY TYPE - Total households - Nonfamily households - Householder living alone - 65 years and over	Margin of Error; HOUSEHOLDS BY TYPE - Total households - Nonfamily households - Householder living alone - 65 years and over	Percent; HOUSEHOLDS BY TYPE - Total households - Nonfamily households - Householder living alone - 65 years and over
0500000US21001	21001	Adair County, Kentucky	7241	229	7241	(X)	4948	280	68.3	3.6	1766	212	24.4	2.7	3993	257	55.1	3.4	1300	185	18	2.4	259	89	3.6	1.2	117	62	1.6	0.9	696	160	9.6	2.2	349	127	4.8	1.7	2293	280	31.7	3.6	2146	264	29.6	3.4	1006	168	13.9
0500000US21003	21003	Allen County, Kentucky	8061	223	8061	(X)	5629	295	69.8	3.1	2282	199	28.3	2.2	4359	270	54.1	3.1	1577	185	19.6	2.2	374	140	4.6	1.7	189	111	2.3	1.4	896	186	11.1	2.3	516	158	6.4	1.9	2432	256	30.2	3.1	2157	245	26.8	2.9	871	134	10.8
0500000US21005	21005	Anderson County, Kentucky	8323	234	8323	(X)	6032	269	72.5	2.9	2766	259	33.2	2.9	4651	298	55.9	3.4	1926	215	23.1	2.5	363	132	4.4	1.6	243	120	2.9	1.4	1018	192	12.2	2.2	597	181	7.2	2.1	2291	259	27.5	2.9	1892	255	22.7	2.9	845	152	10.2
0500000US21007	21007	Ballard County, Kentucky	3327	122	3327	(X)	2265	130	68.1	3.7	777	98	23.4	2.8	1936	125	58.2	3.8	611	85	18.4	2.5	99	39	3	1.1	46	23	1.4	0.7	230	62	6.9	1.8	120	46	3.6	1.4	1062	136	31.9	3.7	958	129	28.8	3.5	437	93	13.1
0500000US21009	21009	Barren County, Kentucky	16584	353	16584	(X)	11733	399	70.7	2.1	5138	294	31	1.6	9003	453	54.3	2.7	3532	324	21.3	1.9	679	217	4.1	1.3	330	167	2	1	2051	306	12.4	1.8	1276	230	7.7	1.4	4851	378	29.3	2.1	4479	381	27	2.1	2186	243	13.2
0500000US21011	21011	Bath County, Kentucky	4447	192	4447	(X)	3072	223	69.1	3.7	1324	160	29.8	3.1	2367	195	53.2	3.9	867	119	19.5	2.5	190	77	4.3	1.7	131	70	2.9	1.5	515	130	11.6	2.8	326	95	7.3	2.1	1375	169	30.9	3.7	1156	162	26	3.6	468	103	10.5
0500000US21013	21013	Bell County, Kentucky	11109	297	11109	(X)	7549	379	68	2.9	2927	283	26.3	2.2	5073	326	45.7	2.7	1713	248	15.4	2.1	712	176	6.4	1.6	323	117	2.9	1	1764	210	15.9	1.8	891	182	8	1.6	3560	334	32	2.9	3201	290	28.8	2.4	1438	227	12.9
0500000US21015	21015	Boone County, Kentucky	43255	530	43255	(X)	32123	657	74.3	1.5	16103	524	37.2	1.1	25311	558	58.5	1.3	12248	486	28.3	1.1	2135	321	4.9	0.7	1230	237	2.8	0.5	4677	445	10.8	1	2625	347	6.1	0.8	11132	710	25.7	1.5	9279	695	21.5	1.5	2746	334	6.3
0500000US21017	21017	Bourbon County, Kentucky	7865	227	7865	(X)	5407	254	68.7	3.2	2312	212	29.4	2.7	3934	258	50	3.6	1552	180	19.7	2.4	290	94	3.7	1.2	85	54	1.1	0.7	1183	194	15	2.3	675	145	8.6	1.8	2458	280	31.3	3.2	2125	284	27	3.3	899	161	11.4
0500000US21019	21019	Boyd County, Kentucky	19530	307	19530	(X)	13232	437	67.8	1.9	5143	284	26.3	1.3	10004	389	51.2	1.9	3553	257	18.2	1.3	996	235	5.1	1.2	391	154	2	0.8	2232	254	11.4	1.3	1199	210	6.1	1.1	6298	378	32.2	1.9	5541	346	28.4	1.7	2537	246	13
0500000US21021	21021	Boyle County, Kentucky	11100	287	11100	(X)	7472	321	67.3	2.7	3073	251	27.7	2.1	5327	289	48	2.7	1803	191	16.2	1.7	467	121	4.2	1.1	233	85	2.1	0.7	1678	221	15.1	1.9	1037	180	9.3	1.6	3628	328	32.7	2.7	3190	289	28.7	2.4	1222	175	11
0500000US21023	21023	Bracken County, Kentucky	3252	156	3252	(X)	2164	170	66.5	4.2	866	133	26.6	3.5	1687	151	51.9	4.2	604	120	18.6	3.4	97	49	3	1.5	36	27	1.1	0.8	380	78	11.7	2.2	226	65	6.9	1.9	1088	148	33.5	4.2	968	139	29.8	4	466	81	14.3
0500000US21025	21025	Breathitt County, Kentucky	5290	212	5290	(X)	3432	220	64.9	3.4	1203	159	22.7	2.7	2291	187	43.3	3.2	708	133	13.4	2.4	290	83	5.5	1.5	71	46	1.3	0.9	851	135	16.1	2.5	424	106	8	2	1858	197	35.1	3.4	1692	194	32	3.3	742	138	14
0500000US21027	21027	Breckinridge County, Kentucky	7213	260	7213	(X)	5178	258	71.8	3	1793	183	24.9	2.1	4159	253	57.7	3.1	1337	186	18.5	2.3	312	111	4.3	1.5	190	85	2.6	1.2	707	149	9.8	2.1	266	90	3.7	1.2	2035	242	28.2	3	1760	230	24.4	2.9	808	138	11.2
0500000US21029	21029	Bullitt County, Kentucky	27874	327	27874	(X)	20986	483	75.3	1.6	9073	367	32.6	1.2	16067	552	57.6	1.9	6099	363	21.9	1.3	1472	290	5.3	1	808	193	2.9	0.7	3447	412	12.4	1.5	2166	308	7.8	1.1	6888	458	24.7	1.6	5720	460	20.5	1.6	2342	252	8.4
0500000US21031	21031	Butler County, Kentucky	5124	164	5124	(X)	3684	185	71.9	3.5	1536	173	30	3.2	2852	171	55.7	3.4	1024	140	20	2.7	291	107	5.7	2.1	132	90	2.6	1.7	541	124	10.6	2.4	380	117	7.4	2.3	1440	196	28.1	3.5	1284	193	25.1	3.5	514	106	10
0500000US21033	21033	Caldwell County, Kentucky	5232	238	5232	(X)	3516	258	67.2	4.3	1288	209	24.6	3.9	2559	273	48.9	5	758	175	14.5	3.3	163	94	3.1	1.8	64	47	1.2	0.9	794	212	15.2	4	466	165	8.9	3.2	1716	246	32.8	4.3	1577	236	30.1	4.2	684	152	13.1
0500000US21035	21035	Calloway County, Kentucky	14937	453	14937	(X)	8773	387	58.7	2.5	3543	261	23.7	1.6	7139	354	47.8	2.4	2696	188	18	1.2	555	155	3.7	1	333	129	2.2	0.9	1079	178	7.2	1.2	514	150	3.4	1	6164	457	41.3	2.5	4813	419	32.2	2.5	1717	247	11.5
0500000US21037	21037	Campbell County, Kentucky	35203	600	35203	(X)	22673	575	64.4	1.4	9726	488	27.6	1.3	16772	527	47.6	1.5	6572	395	18.7	1.1	1540	250	4.4	0.7	683	167	1.9	0.5	4361	321	12.4	0.9	2471	271	7	0.8	12530	579	35.6	1.4	10612	530	30.1	1.4	3628	300	10.3
0500000US21039	21039	Carlisle County, Kentucky	2034	83	2034	(X)	1534	86	75.4	3.9	585	71	28.8	3.4	1168	105	57.4	5.2	407	70	20	3.4	119	45	5.9	2.2	46	25	2.3	1.2	247	76	12.1	3.7	132	55	6.5	2.7	500	87	24.6	3.9	458	84	22.5	3.8	264	51	13
0500000US21041	21041	Carroll County, Kentucky	4269	157	4269	(X)	2863	182	67.1	3.9	1329	142	31.1	3	1920	168	45	4	673	110	15.8	2.5	430	119	10.1	2.8	281	100	6.6	2.3	513	123	12	2.8	375	107	8.8	2.4	1406	182	32.9	3.9	1177	182	27.6	4	403	91	9.4
0500000US21043	21043	Carter County, Kentucky	10319	295	10319	(X)	7151	352	69.3	2.6	2519	278	24.4	2.5	5792	320	56.1	2.7	1883	230	18.2	2.1	350	111	3.4	1	159	81	1.5	0.8	1009	203	9.8	1.9	477	155	4.6	1.5	3168	282	30.7	2.6	2675	264	25.9	2.4	1297	180	12.6
0500000US21045	21045	Casey County, Kentucky	6050	215	6050	(X)	4214	238	69.7	3.9	1653	198	27.3	3.2	3396	249	56.1	4.3	1211	172	20	2.8	272	113	4.5	1.8	177	96	2.9	1.6	546	147	9	2.4	265	109	4.4	1.8	1836	267	30.3	3.9	1655	236	27.4	3.4	820	153	13.6
0500000US21047	21047	Christian County, Kentucky	25899	520	25899	(X)	18397	479	71	1.7	9948	392	38.4	1.4	13640	520	52.7	1.9	7127	451	27.5	1.7	985	196	3.8	0.7	379	122	1.5	0.5	3772	371	14.6	1.4	2442	312	9.4	1.2	7502	519	29	1.7	6667	495	25.7	1.7	2230	235	8.6
0500000US21049	21049	Clark County, Kentucky	14498	248	14498	(X)	10269	344	70.8	2.2	4159	274	28.7	1.9	7816	343	53.9	2.4	2820	217	19.5	1.5	608	216	4.2	1.5	169	81	1.2	0.5	1845	218	12.7	1.5	1170	209	8.1	1.4	4229	335	29.2	2.2	3475	302	24	2	1461	182	10.1
0500000US21051	21051	Clay County, Kentucky	7317	263	7317	(X)	4939	305	67.5	3.6	1814	219	24.8	2.7	3460	241	47.3	3.2	1153	165	15.8	2.2	351	128	4.8	1.7	132	66	1.8	0.9	1128	225	15.4	2.9	529	163	7.2	2.2	2378	283	32.5	3.6	2187	258	29.9	3.3	821	134	11.2
0500000US21053	21053	Clinton County, Kentucky	3960	220	3960	(X)	2585	190	65.3	4.3	1042	158	26.3	3.4	1823	200	46	4.9	576	149	14.5	3.5	312	118	7.9	2.9	189	88	4.8	2.2	450	124	11.4	3.1	277	107	7	2.7	1375	206	34.7	4.3	1321	202	33.4	4.2	705	133	17.8
0500000US21055	21055	Crittenden County, Kentucky	3794	184	3794	(X)	2451	165	64.6	3.8	918	119	24.2	3	2091	183	55.1	4.6	770	123	20.3	3.1	156	80	4.1	2.1	39	35	1	0.9	204	62	5.4	1.6	109	49	2.9	1.3	1343	173	35.4	3.8	1244	163	32.8	3.7	588	95	15.5
0500000US21057	21057	Cumberland County, Kentucky	2604	178	2604	(X)	1708	175	65.6	4.7	553	117	21.2	3.6	1265	167	48.6	5	331	99	12.7	3.4	130	58	5	2.3	22	23	0.8	0.9	313	89	12	3.2	200	75	7.7	2.8	896	131	34.4	4.7	818	135	31.4	4.8	367	103	14.1
0500000US21059	21059	Daviess County, Kentucky	37677	488	37677	(X)	25866	585	68.7	1.5	10790	431	28.6	1.1	19714	617	52.3	1.7	7016	374	18.6	1	1659	270	4.4	0.7	888	232	2.4	0.6	4493	386	11.9	1	2886	340	7.7	0.9	11811	635	31.3	1.5	10227	570	27.1	1.4	4354	343	11.6
0500000US21061	21061	Edmonson County, Kentucky	4766	243	4766	(X)	3429	264	71.9	4.3	1330	174	27.9	3.4	2903	264	60.9	4.8	1086	167	22.8	3.4	131	73	2.7	1.5	46	46	1	1	395	121	8.3	2.5	198	71	4.2	1.4	1337	217	28.1	4.3	1198	220	25.1	4.4	513	120	10.8
0500000US21063	21063	Elliott County, Kentucky	2618	152	2618	(X)	1773	186	67.7	5.6	676	143	25.8	4.7	1258	197	48.1	7.2	427	111	16.3	3.8	167	72	6.4	2.7	66	59	2.5	2.2	348	122	13.3	4.5	183	81	7	3	845	151	32.3	5.6	696	130	26.6	4.8	337	118	12.9
0500000US21065	21065	Estill County, Kentucky	5829	206	5829	(X)	3968	213	68.1	2.9	1644	168	28.2	2.6	2827	232	48.5	3.7	919	157	15.8	2.6	206	76	3.5	1.3	64	47	1.1	0.8	935	177	16	3	661	162	11.3	2.7	1861	184	31.9	2.9	1652	185	28.3	3	713	118	12.2
0500000US21067	21067	Fayette County, Kentucky	123142	982	123142	(X)	71828	1158	58.3	0.9	33275	765	27	0.6	50877	1093	41.3	0.9	20989	694	17	0.6	5172	465	4.2	0.4	2550	377	2.1	0.3	15779	893	12.8	0.7	9736	709	7.9	0.6	51314	1200	41.7	0.9	39782	1165	32.3	0.9	10239	532	8.3
0500000US21069	21069	Fleming County, Kentucky	5539	190	5539	(X)	3913	190	70.6	2.8	1589	187	28.7	3.1	3018	201	54.5	3.4	1121	171	20.2	3	273	97	4.9	1.7	140	81	2.5	1.5	622	165	11.2	3	328	148	5.9	2.6	1626	174	29.4	2.8	1469	166	26.5	2.7	598	110	10.8
0500000US21071	21071	Floyd County, Kentucky	15422	387	15422	(X)	10638	549	69	2.9	3832	358	24.8	2.1	7786	500	50.5	2.9	2601	314	16.9	1.9	783	194	5.1	1.2	297	117	1.9	0.7	2069	318	13.4	2	934	187	6.1	1.2	4784	458	31	2.9	4169	397	27	2.5	1435	207	9.3
0500000US21073	21073	Franklin County, Kentucky	21058	375	21058	(X)	12760	381	60.6	1.8	5569	364	26.4	1.7	8848	477	42	2.4	3232	366	15.3	1.8	1115	329	5.3	1.5	688	260	3.3	1.2	2797	340	13.3	1.6	1649	313	7.8	1.5	8298	447	39.4	1.8	7052	438	33.5	1.9	2230	253	10.6
0500000US21075	21075	Fulton County, Kentucky	2744	160	2744	(X)	1781	161	64.9	4.7	750	131	27.3	4.5	1289	138	47	4.2	454	92	16.5	3.3	127	60	4.6	2.2	77	56	2.8	2	365	85	13.3	3	219	76	8	2.7	963	145	35.1	4.7	922	141	33.6	4.5	323	74	11.8
0500000US21077	21077	Gallatin County, Kentucky	2995	165	2995	(X)	2052	173	68.5	5.2	807	121	26.9	4.3	1458	186	48.7	6	529	112	17.7	3.7	228	94	7.6	3.1	123	78	4.1	2.6	366	118	12.2	3.9	155	70	5.2	2.4	943	173	31.5	5.2	767	155	25.6	4.6	256	69	8.5
0500000US21079	21079	Garrard County, Kentucky	6302	219	6302	(X)	4791	246	76	3.2	1846	191	29.3	2.9	3884	264	61.6	3.9	1375	170	21.8	2.7	210	102	3.3	1.6	91	71	1.4	1.1	697	160	11.1	2.5	380	128	6	2	1511	213	24	3.2	1400	204	22.2	3	615	135	9.8
0500000US21081	21081	Grant County, Kentucky	8334	324	8334	(X)	6427	316	77.1	2.6	3036	226	36.4	2.2	5002	316	60	3.4	2223	197	26.7	2.2	386	132	4.6	1.5	258	117	3.1	1.4	1039	196	12.5	2.3	555	154	6.7	1.8	1907	236	22.9	2.6	1558	244	18.7	2.8	557	153	6.7
0500000US21083	21083	Graves County, Kentucky	14419	367	14419	(X)	10029	442	69.6	2.2	4188	306	29	1.8	8111	370	56.3	2.3	3052	265	21.2	1.8	519	152	3.6	1	327	124	2.3	0.8	1399	227	9.7	1.5	809	183	5.6	1.2	4390	318	30.4	2.2	4156	321	28.8	2.2	1898	202	13.2
0500000US21085	21085	Grayson County, Kentucky	9897	317	9897	(X)	6803	317	68.7	2.4	2631	270	26.6	2.5	5618	330	56.8	2.9	2046	242	20.7	2.3	356	125	3.6	1.2	165	69	1.7	0.7	829	168	8.4	1.7	420	150	4.2	1.5	3094	257	31.3	2.4	2728	250	27.6	2.4	1248	214	12.6
0500000US21087	21087	Green County, Kentucky	4495	160	4495	(X)	3221	174	71.7	3.2	1248	143	27.8	2.9	2528	169	56.2	3.3	903	116	20.1	2.4	136	59	3	1.3	63	40	1.4	0.9	557	97	12.4	2.1	282	78	6.3	1.6	1274	158	28.3	3.2	1193	152	26.5	3.1	631	115	14
0500000US21089	21089	Greenup County, Kentucky	14465	275	14465	(X)	10204	314	70.5	2	3917	217	27.1	1.4	7824	335	54.1	2.2	2770	220	19.1	1.5	723	145	5	1	325	100	2.2	0.7	1657	232	11.5	1.6	822	152	5.7	1	4261	307	29.5	2	3926	301	27.1	1.9	1643	188	11.4
0500000US21091	21091	Hancock County, Kentucky	3361	112	3361	(X)	2610	147	77.7	3.8	1126	125	33.5	3.6	1999	128	59.5	3.8	781	109	23.2	3.1	149	57	4.4	1.7	82	36	2.4	1.1	462	93	13.7	2.7	263	71	7.8	2.1	751	132	22.3	3.8	688	130	20.5	3.8	235	54	7
0500000US21093	21093	Hardin County, Kentucky	39401	623	39401	(X)	28277	722	71.8	1.4	13558	516	34.4	1.2	21112	628	53.6	1.6	8901	449	22.6	1.2	1815	346	4.6	0.9	1126	306	2.9	0.8	5350	459	13.6	1.1	3531	372	9	0.9	11124	594	28.2	1.4	9595	525	24.4	1.3	3002	283	7.6
0500000US21095	21095	Harlan County, Kentucky	11343	231	11343	(X)	8039	317	70.9	2.5	3225	253	28.4	2	5510	323	48.6	2.7	2200	234	19.4	2	819	194	7.2	1.7	241	93	2.1	0.8	1710	239	15.1	2.1	784	162	6.9	1.4	3304	293	29.1	2.5	2971	290	26.2	2.4	1362	175	12
0500000US21097	21097	Harrison County, Kentucky	7179	274	7179	(X)	4643	285	64.7	3.7	1920	244	26.7	3.3	3505	257	48.8	3.5	1210	194	16.9	2.7	295	141	4.1	1.9	175	119	2.4	1.6	843	163	11.7	2.2	535	163	7.5	2.3	2536	302	35.3	3.7	2136	274	29.8	3.5	830	167	11.6
0500000US21099	21099	Hart County, Kentucky	7115	237	7115	(X)	5011	234	70.4	2.9	2035	200	28.6	2.5	3807	226	53.5	3.2	1344	159	18.9	2.1	310	96	4.4	1.3	164	74	2.3	1	894	147	12.6	2	527	120	7.4	1.6	2104	234	29.6	2.9	1848	222	26	2.8	803	146	11.3
0500000US21101	21101	Henderson County, Kentucky	18787	332	18787	(X)	12498	447	66.5	2.1	5019	324	26.7	1.6	9352	399	49.8	2.1	3346	297	17.8	1.6	744	190	4	1	316	132	1.7	0.7	2402	275	12.8	1.4	1357	205	7.2	1	6289	419	33.5	2.1	5642	404	30	2.1	2214	234	11.8
0500000US21103	21103	Henry County, Kentucky	6008	148	6008	(X)	4351	212	72.4	3.3	1670	155	27.8	2.5	3306	214	55	3.6	1146	147	19.1	2.5	324	86	5.4	1.4	120	56	2	0.9	721	129	12	2.1	404	93	6.7	1.5	1657	208	27.6	3.3	1351	171	22.5	2.7	647	115	10.8
0500000US21105	21105	Hickman County, Kentucky	1983	103	1983	(X)	1196	123	60.3	5.5	437	69	22	3.3	901	127	45.4	6.1	309	80	15.6	4	44	28	2.2	1.4	27	22	1.4	1.1	251	87	12.7	4.3	101	43	5.1	2.1	787	119	39.7	5.5	694	112	35	5.2	415	92	20.9
0500000US21107	21107	Hopkins County, Kentucky	18495	396	18495	(X)	12646	362	68.4	2	5236	301	28.3	1.5	9427	379	51	2.1	3395	264	18.4	1.4	782	166	4.2	0.9	451	126	2.4	0.7	2437	256	13.2	1.4	1390	219	7.5	1.2	5849	429	31.6	2	5358	406	29	1.9	2318	229	12.5
0500000US21109	21109	Jackson County, Kentucky	5712	252	5712	(X)	3985	367	69.8	5.5	1476	245	25.8	3.8	2813	306	49.2	5.1	885	180	15.5	3	314	123	5.5	2.1	164	89	2.9	1.6	858	193	15	3.1	427	149	7.5	2.5	1727	322	30.2	5.5	1530	278	26.8	4.8	469	143	8.2
0500000US21111	21111	Jefferson County, Kentucky	305832	1303	305832	(X)	187930	1628	61.4	0.5	82201	1254	26.9	0.4	127195	1685	41.6	0.5	48055	1128	15.7	0.4	14020	800	4.6	0.3	6760	632	2.2	0.2	46715	1071	15.3	0.4	27386	830	9	0.3	117902	1555	38.6	0.5	99201	1584	32.4	0.5	31541	937	10.3
0500000US21113	21113	Jessamine County, Kentucky	18012	345	18012	(X)	13441	453	74.6	2.2	6390	360	35.5	1.8	10351	517	57.5	2.8	4606	351	25.6	1.9	792	185	4.4	1	499	168	2.8	0.9	2298	291	12.8	1.5	1285	231	7.1	1.2	4571	423	25.4	2.2	3526	368	19.6	2	1172	226	6.5
0500000US21115	21115	Johnson County, Kentucky	9154	240	9154	(X)	6635	329	72.5	3.2	2559	270	28	2.8	5092	341	55.6	3.5	1746	230	19.1	2.4	449	178	4.9	1.9	204	125	2.2	1.4	1094	225	12	2.4	609	184	6.7	2	2519	307	27.5	3.2	2272	302	24.8	3.2	793	145	8.7
0500000US21117	21117	Kenton County, Kentucky	61800	645	61800	(X)	40067	723	64.8	1.1	18557	554	30	0.9	28557	641	46.2	1	11881	571	19.2	0.9	2999	377	4.9	0.6	1626	266	2.6	0.4	8511	488	13.8	0.8	5050	373	8.2	0.6	21733	794	35.2	1.1	18048	717	29.2	1	5593	374	9.1
0500000US21119	21119	Knott County, Kentucky	5892	237	5892	(X)	4067	250	69	3.9	1393	181	23.6	2.9	3035	232	51.5	3.9	958	158	16.3	2.6	333	106	5.7	1.8	109	51	1.8	0.9	699	141	11.9	2.4	326	85	5.5	1.5	1825	255	31	3.9	1593	226	27	3.4	638	115	10.8
0500000US21121	21121	Knox County, Kentucky	12350	341	12350	(X)	8237	460	66.7	3.4	3101	381	25.1	3	5905	398	47.8	3.2	1946	284	15.8	2.3	609	162	4.9	1.3	245	101	2	0.8	1723	317	14	2.5	910	281	7.4	2.3	4113	444	33.3	3.4	3726	415	30.2	3.2	1533	231	12.4
0500000US21123	21123	Larue County, Kentucky	5221	221	5221	(X)	3866	232	74	3	1460	206	28	3.6	2908	220	55.7	3.6	923	148	17.7	2.8	253	87	4.8	1.6	147	71	2.8	1.3	705	155	13.5	2.9	390	133	7.5	2.5	1355	163	26	3	1194	165	22.9	3.1	551	105	10.6
0500000US21125	21125	Laurel County, Kentucky	22931	362	22931	(X)	16887	425	73.6	1.7	7001	361	30.5	1.5	12600	508	54.9	2.2	4759	401	20.8	1.7	1186	238	5.2	1	571	168	2.5	0.7	3101	372	13.5	1.6	1671	285	7.3	1.2	6044	427	26.4	1.7	5074	451	22.1	1.9	1890	283	8.2
0500000US21127	21127	Lawrence County, Kentucky	5823	245	5823	(X)	4136	253	71	3.9	1547	176	26.6	2.7	3249	266	55.8	4.4	1156	190	19.9	3	177	81	3	1.4	57	30	1	0.5	710	140	12.2	2.4	334	120	5.7	2.1	1687	256	29	3.9	1511	228	25.9	3.5	666	140	11.4
0500000US21129	21129	Lee County, Kentucky	2951	158	2951	(X)	1910	200	64.7	6.1	700	146	23.7	4.8	1367	163	46.3	5.3	481	110	16.3	3.7	154	66	5.2	2.2	8	14	0.3	0.5	389	108	13.2	3.6	211	92	7.2	3	1041	191	35.3	6.1	914	178	31	5.7	314	59	10.6
0500000US21131	21131	Leslie County, Kentucky	4206	218	4206	(X)	2992	233	71.1	4.3	1199	188	28.5	3.8	2280	239	54.2	4.7	876	170	20.8	3.5	153	68	3.6	1.6	54	33	1.3	0.8	559	155	13.3	3.7	269	98	6.4	2.3	1214	193	28.9	4.3	1063	182	25.3	4	467	124	11.1
0500000US21133	21133	Letcher County, Kentucky	9366	343	9366	(X)	6467	378	69	3.4	2091	236	22.3	2.4	4987	376	53.2	3.6	1515	230	16.2	2.4	334	117	3.6	1.3	132	66	1.4	0.7	1146	210	12.2	2.2	444	126	4.7	1.3	2899	348	31	3.4	2573	323	27.5	3.2	1078	166	11.5
0500000US21135	21135	Lewis County, Kentucky	5003	219	5003	(X)	3630	232	72.6	3.7	1343	150	26.8	2.6	2757	250	55.1	4.4	855	149	17.1	2.9	245	115	4.9	2.3	109	78	2.2	1.6	628	119	12.6	2.4	379	102	7.6	2	1373	201	27.4	3.7	1129	183	22.6	3.4	514	113	10.3
0500000US21137	21137	Lincoln County, Kentucky	9692	235	9692	(X)	6896	341	71.2	3.4	2928	253	30.2	2.6	5048	336	52.1	3.5	1912	241	19.7	2.5	607	184	6.3	1.9	308	133	3.2	1.4	1241	201	12.8	2.1	708	146	7.3	1.5	2796	343	28.8	3.4	2477	336	25.6	3.3	1133	195	11.7
0500000US21139	21139	Livingston County, Kentucky	3569	184	3569	(X)	2665	188	74.7	4.2	769	149	21.5	3.7	2178	181	61	4.8	511	123	14.3	3.2	160	71	4.5	2	81	56	2.3	1.5	327	94	9.2	2.5	177	74	5	2	904	162	25.3	4.2	842	155	23.6	4	448	97	12.6
0500000US21141	21141	Logan County, Kentucky	10912	248	10912	(X)	7455	399	68.3	3.2	2945	295	27	2.7	5474	371	50.2	3.2	1901	233	17.4	2.2	685	197	6.3	1.8	305	125	2.8	1.1	1296	225	11.9	2	739	170	6.8	1.5	3457	348	31.7	3.2	3115	314	28.5	2.9	1310	193	12
0500000US21143	21143	Lyon County, Kentucky	3294	219	3294	(X)	1903	229	57.8	6	489	117	14.8	3.1	1568	212	47.6	5.9	323	81	9.8	2.2	64	36	1.9	1.1	11	11	0.3	0.3	271	98	8.2	2.9	155	85	4.7	2.5	1391	221	42.2	6	1222	208	37.1	5.8	437	115	13.3
0500000US21145	21145	McCracken County, Kentucky	27037	474	27037	(X)	17563	485	65	1.6	6960	399	25.7	1.4	13108	511	48.5	1.8	4419	394	16.3	1.5	1030	214	3.8	0.8	505	155	1.9	0.6	3425	380	12.7	1.4	2036	311	7.5	1.1	9474	508	35	1.6	8394	454	31	1.5	3262	308	12.1
0500000US21147	21147	McCreary County, Kentucky	6312	274	6312	(X)	4535	298	71.8	4.3	1636	245	25.9	3.6	3296	356	52.2	5.3	1232	216	19.5	3.2	552	153	8.7	2.5	140	83	2.2	1.3	687	196	10.9	3.1	264	119	4.2	1.9	1777	295	28.2	4.3	1654	277	26.2	4	545	141	8.6
0500000US21149	21149	McLean County, Kentucky	3770	138	3770	(X)	2651	144	70.3	3.2	1113	113	29.5	2.7	2091	150	55.5	3.5	715	103	19	2.6	173	62	4.6	1.7	137	60	3.6	1.6	387	82	10.3	2.1	261	71	6.9	1.8	1119	132	29.7	3.2	999	123	26.5	3	444	77	11.8
0500000US21151	21151	Madison County, Kentucky	31484	579	31484	(X)	20544	508	65.3	1.5	9203	386	29.2	1.1	15388	464	48.9	1.4	6151	339	19.5	1.1	1386	214	4.4	0.7	844	190	2.7	0.6	3770	329	12	1	2208	295	7	0.9	10940	560	34.7	1.5	8401	555	26.7	1.7	2734	267	8.7
0500000US21153	21153	Magoffin County, Kentucky	4931	186	4931	(X)	3530	264	71.6	4.3	1424	199	28.9	3.6	2683	220	54.4	4.1	901	151	18.3	3	205	104	4.2	2.1	127	97	2.6	1.9	642	134	13	2.6	396	116	8	2.2	1401	211	28.4	4.3	1363	207	27.6	4.2	451	116	9.1
0500000US21155	21155	Marion County, Kentucky	7368	206	7368	(X)	4755	264	64.5	3	2274	216	30.9	2.6	3551	240	48.2	3	1497	178	20.3	2.2	306	101	4.2	1.3	168	79	2.3	1.1	898	136	12.2	1.8	609	127	8.3	1.7	2613	232	35.5	3	2249	212	30.5	2.9	935	141	12.7
0500000US21157	21157	Marshall County, Kentucky	11963	401	11963	(X)	8784	375	73.4	3	3002	307	25.1	2.4	7036	433	58.8	3.8	2228	276	18.6	2.2	554	205	4.6	1.7	189	99	1.6	0.8	1194	235	10	1.9	585	169	4.9	1.4	3179	415	26.6	3	2887	375	24.1	2.8	1301	189	10.9
0500000US21159	21159	Martin County, Kentucky	4449	293	4449	(X)	3235	290	72.7	4.7	1378	228	31	4.7	2334	302	52.5	5.7	755	190	17	4	277	143	6.2	3.2	238	137	5.3	3	624	149	14	3.4	385	134	8.7	3.1	1214	226	27.3	4.7	1034	210	23.2	4.4	467	126	10.5
0500000US21161	21161	Mason County, Kentucky	6569	257	6569	(X)	4666	250	71	2.9	1915	203	29.2	2.7	3424	204	52.1	2.8	1150	144	17.5	2	329	110	5	1.6	164	87	2.5	1.3	913	148	13.9	2.2	601	127	9.1	1.9	1903	214	29	2.9	1680	206	25.6	2.9	728	105	11.1
0500000US21163	21163	Meade County, Kentucky	10342	270	10342	(X)	7872	300	76.1	2.4	3588	291	34.7	2.7	6138	340	59.4	3	2521	290	24.4	2.7	658	242	6.4	2.3	378	192	3.7	1.9	1076	197	10.4	1.9	689	165	6.7	1.6	2470	268	23.9	2.4	2093	250	20.2	2.3	978	158	9.5
0500000US21165	21165	Menifee County, Kentucky	2379	147	2379	(X)	1608	135	67.6	5.5	663	117	27.9	5	1225	142	51.5	5.4	458	97	19.3	3.9	95	60	4	2.5	54	51	2.3	2.1	288	81	12.1	3.6	151	65	6.3	2.8	771	153	32.4	5.5	674	143	28.3	5.1	222	75	9.3
0500000US21167	21167	Mercer County, Kentucky	8745	213	8745	(X)	5996	256	68.6	2.5	2176	190	24.9	2	4588	255	52.5	2.9	1509	180	17.3	2	355	115	4.1	1.3	169	87	1.9	1	1053	184	12	2.1	498	146	5.7	1.6	2749	235	31.4	2.5	2429	238	27.8	2.6	1087	141	12.4
0500000US21169	21169	Metcalfe County, Kentucky	3919	203	3919	(X)	2717	224	69.3	4.8	1025	152	26.2	3.5	2168	201	55.3	4.5	778	131	19.9	3.2	259	112	6.6	2.8	124	89	3.2	2.2	290	73	7.4	1.9	123	56	3.1	1.4	1202	202	30.7	4.8	1062	196	27.1	4.7	414	96	10.6
0500000US21171	21171	Monroe County, Kentucky	4401	197	4401	(X)	2865	239	65.1	4.6	997	137	22.7	2.7	2243	218	51	4.5	719	122	16.3	2.7	74	40	1.7	0.9	25	22	0.6	0.5	548	126	12.5	2.8	253	93	5.7	2	1536	218	34.9	4.6	1279	192	29.1	4.2	710	135	16.1
0500000US21173	21173	Montgomery County, Kentucky	10168	265	10168	(X)	6773	321	66.6	3.2	3033	260	29.8	2.5	4861	278	47.8	3	1864	278	18.3	2.7	629	178	6.2	1.8	476	169	4.7	1.7	1283	216	12.6	2	693	159	6.8	1.5	3395	364	33.4	3.2	2753	320	27.1	2.9	868	158	8.5
0500000US21175	21175	Morgan County, Kentucky	4697	200	4697	(X)	3503	248	74.6	3.9	1319	175	28.1	3.3	2790	225	59.4	3.8	989	164	21.1	3.3	146	70	3.1	1.5	73	43	1.6	0.9	567	135	12.1	2.8	257	91	5.5	1.9	1194	188	25.4	3.9	989	167	21.1	3.5	439	83	9.3
0500000US21177	21177	Muhlenberg County, Kentucky	11869	339	11869	(X)	8579	380	72.3	2.6	3251	312	27.4	2.3	6635	364	55.9	2.7	2164	248	18.2	1.9	467	152	3.9	1.2	239	129	2	1.1	1477	257	12.4	2.2	848	191	7.1	1.6	3290	325	27.7	2.6	2940	296	24.8	2.4	1264	168	10.6
0500000US21179	21179	Nelson County, Kentucky	16571	369	16571	(X)	12171	479	73.4	2.3	5691	377	34.3	2	9104	415	54.9	2.4	3846	347	23.2	2	982	258	5.9	1.5	568	177	3.4	1.1	2085	304	12.6	1.8	1277	261	7.7	1.5	4400	392	26.6	2.3	3744	364	22.6	2.1	1159	221	7
0500000US21181	21181	Nicholas County, Kentucky	2884	113	2884	(X)	1974	131	68.4	4.2	825	118	28.6	3.8	1505	138	52.2	4.8	556	118	19.3	4.1	79	40	2.7	1.4	45	28	1.6	1	390	101	13.5	3.4	224	94	7.8	3.2	910	132	31.6	4.2	754	119	26.1	3.9	303	82	10.5
0500000US21183	21183	Ohio County, Kentucky	8715	219	8715	(X)	6369	317	73.1	3.1	2461	214	28.2	2.3	4938	286	56.7	3.1	1625	196	18.6	2.2	317	105	3.6	1.2	204	77	2.3	0.9	1114	168	12.8	1.9	632	136	7.3	1.5	2346	280	26.9	3.1	2080	261	23.9	2.9	993	171	11.4
0500000US21185	21185	Oldham County, Kentucky	19532	302	19532	(X)	15915	344	81.5	1.5	7853	304	40.2	1.4	13307	361	68.1	2	6322	324	32.4	1.7	841	186	4.3	0.9	428	125	2.2	0.6	1767	248	9	1.2	1103	204	5.6	1	3617	306	18.5	1.5	2969	278	15.2	1.4	1000	152	5.1
0500000US21187	21187	Owen County, Kentucky	4601	220	4601	(X)	3121	220	67.8	4	1413	175	30.7	3.5	2356	217	51.2	4.2	1009	143	21.9	3	329	106	7.2	2.3	154	85	3.3	1.8	436	128	9.5	2.8	250	113	5.4	2.4	1480	205	32.2	4	1390	205	30.2	4.1	470	120	10.2
0500000US21189	21189	Owsley County, Kentucky	1721	157	1721	(X)	1129	115	65.6	7.6	430	99	25	6	793	121	46.1	7.5	261	81	15.2	4.9	98	56	5.7	3.3	37	38	2.1	2.2	238	80	13.8	4.6	132	62	7.7	3.5	592	167	34.4	7.6	588	166	34.2	7.6	232	103	13.5
0500000US21191	21191	Pendleton County, Kentucky	5357	220	5357	(X)	3561	280	66.5	4	1394	205	26	3.5	2821	275	52.7	4.6	996	172	18.6	3.1	216	89	4	1.6	70	48	1.3	0.9	524	135	9.8	2.4	328	98	6.1	1.7	1796	218	33.5	4	1452	186	27.1	3.4	539	121	10.1
0500000US21193	21193	Perry County, Kentucky	10801	356	10801	(X)	7587	453	70.2	3.6	3092	318	28.6	2.6	5257	365	48.7	3.3	1971	249	18.2	2.2	656	149	6.1	1.3	265	106	2.5	1	1674	258	15.5	2.3	856	206	7.9	1.9	3214	404	29.8	3.6	2717	356	25.2	3.2	1125	185	10.4
0500000US21195	21195	Pike County, Kentucky	26362	453	26362	(X)	17962	572	68.1	1.9	7023	353	26.6	1.2	13390	541	50.8	1.8	4996	353	19	1.2	1303	239	4.9	0.9	494	151	1.9	0.6	3269	327	12.4	1.3	1533	238	5.8	0.9	8400	522	31.9	1.9	7552	493	28.6	1.8	2875	252	10.9
0500000US21197	21197	Powell County, Kentucky	4730	224	4730	(X)	2989	239	63.2	4.8	1359	181	28.7	3.6	2022	228	42.7	4.6	762	135	16.1	2.7	262	96	5.5	2	142	68	3	1.4	705	167	14.9	3.6	455	134	9.6	2.9	1741	256	36.8	4.8	1493	243	31.6	4.7	526	139	11.1
0500000US21199	21199	Pulaski County, Kentucky	26108	462	26108	(X)	17797	633	68.2	2.3	6957	471	26.6	1.7	13634	529	52.2	1.9	4592	391	17.6	1.5	1044	202	4	0.8	405	151	1.6	0.6	3119	413	11.9	1.6	1960	354	7.5	1.3	8311	650	31.8	2.3	7238	534	27.7	1.9	2969	302	11.4
0500000US21201	21201	Robertson County, Kentucky	884	100	884	(X)	552	66	62.4	8.3	224	60	25.3	7.9	437	71	49.4	8	172	61	19.5	7.6	20	24	2.3	2.6	14	21	1.6	2.3	95	48	10.7	5.6	38	23	4.3	2.7	332	99	37.6	8.3	303	98	34.3	8.6	113	49	12.8
0500000US21203	21203	Rockcastle County, Kentucky	6605	229	6605	(X)	4808	271	72.8	3.5	1919	189	29.1	2.5	3643	244	55.2	3.8	1455	151	22	2.2	189	66	2.9	1	74	35	1.1	0.5	976	200	14.8	2.8	390	125	5.9	1.8	1797	242	27.2	3.5	1662	235	25.2	3.4	812	133	12.3
0500000US21205	21205	Rowan County, Kentucky	8305	336	8305	(X)	5350	314	64.4	3.2	2373	264	28.6	3.2	3953	306	47.6	3.4	1732	268	20.9	3.2	385	142	4.6	1.7	88	69	1.1	0.8	1012	201	12.2	2.4	553	154	6.7	1.9	2955	307	35.6	3.2	2371	305	28.5	3.3	841	166	10.1
0500000US21207	21207	Russell County, Kentucky	7270	210	7270	(X)	4774	279	65.7	3.6	1699	206	23.4	2.7	3516	252	48.4	3.3	1154	178	15.9	2.4	415	146	5.7	2	129	72	1.8	1	843	172	11.6	2.3	416	138	5.7	1.9	2496	285	34.3	3.6	2215	270	30.5	3.5	1043	139	14.3
0500000US21209	21209	Scott County, Kentucky	17989	334	17989	(X)	13054	399	72.6	1.9	6383	381	35.5	1.9	9827	438	54.6	2.2	4426	321	24.6	1.7	846	223	4.7	1.2	459	167	2.6	0.9	2381	285	13.2	1.6	1498	267	8.3	1.5	4935	363	27.4	1.9	4130	356	23	1.9	1130	207	6.3
0500000US21211	21211	Shelby County, Kentucky	15469	323	15469	(X)	11749	413	76	2	5135	339	33.2	2	9128	474	59	2.8	3524	365	22.8	2.3	858	228	5.5	1.5	529	221	3.4	1.4	1763	311	11.4	2	1082	240	7	1.5	3720	317	24	2	3169	309	20.5	2	1132	188	7.3
0500000US21213	21213	Simpson County, Kentucky	6737	188	6737	(X)	4547	266	67.5	3.5	1849	199	27.4	2.9	3446	269	51.2	3.9	1254	163	18.6	2.5	419	173	6.2	2.5	369	169	5.5	2.5	682	163	10.1	2.4	226	98	3.4	1.4	2190	247	32.5	3.5	1876	229	27.8	3.3	782	122	11.6
0500000US21215	21215	Spencer County, Kentucky	6230	146	6230	(X)	5122	181	82.2	3.2	2274	156	36.5	2.4	4243	193	68.1	3.5	1668	129	26.8	2.1	311	118	5	1.9	211	87	3.4	1.4	568	148	9.1	2.3	395	129	6.3	2.1	1108	211	17.8	3.2	919	201	14.8	3	348	116	5.6
0500000US21217	21217	Taylor County, Kentucky	9708	257	9708	(X)	6580	308	67.8	2.9	2606	262	26.8	2.5	5026	326	51.8	3.2	1698	253	17.5	2.5	264	120	2.7	1.3	101	66	1	0.7	1290	238	13.3	2.4	807	182	8.3	1.8	3128	309	32.2	2.9	2717	316	28	3.1	1145	197	11.8
0500000US21219	21219	Todd County, Kentucky	4574	184	4574	(X)	3306	208	72.3	3.6	1468	148	32.1	2.9	2511	189	54.9	3.7	1014	134	22.2	2.6	218	81	4.8	1.7	95	54	2.1	1.2	577	116	12.6	2.5	359	92	7.8	2	1268	175	27.7	3.6	1101	172	24.1	3.6	463	103	10.1
0500000US21221	21221	Trigg County, Kentucky	5935	293	5935	(X)	4197	302	70.7	4	1498	200	25.2	2.9	3283	272	55.3	4.5	951	164	16	2.8	193	84	3.3	1.4	91	68	1.5	1.1	721	199	12.1	3.1	456	188	7.7	3	1738	261	29.3	4	1538	266	25.9	4.1	656	132	11.1
0500000US21223	21223	Trimble County, Kentucky	3512	130	3512	(X)	2558	188	72.8	4.5	1022	159	29.1	4.4	2176	177	62	4.6	793	123	22.6	3.5	116	66	3.3	1.9	83	55	2.4	1.6	266	89	7.6	2.5	146	87	4.2	2.4	954	162	27.2	4.5	869	158	24.7	4.5	299	77	8.5
0500000US21225	21225	Union County, Kentucky	5586	211	5586	(X)	4008	230	71.8	3.5	1742	197	31.2	3.2	2850	191	51	3.4	1072	122	19.2	2.2	257	121	4.6	2.1	171	100	3.1	1.8	901	153	16.1	2.7	499	153	8.9	2.7	1578	214	28.2	3.5	1407	213	25.2	3.6	673	116	12
0500000US21227	21227	Warren County, Kentucky	44240	521	44240	(X)	27838	667	62.9	1.4	12350	567	27.9	1.2	20615	653	46.6	1.5	8414	473	19	1.1	1796	325	4.1	0.7	775	211	1.8	0.5	5427	510	12.3	1.1	3161	427	7.1	1	16402	670	37.1	1.4	12781	667	28.9	1.5	3665	314	8.3
0500000US21229	21229	Washington County, Kentucky	4480	166	4480	(X)	3322	165	74.2	3.1	1428	133	31.9	2.9	2580	192	57.6	4	982	142	21.9	3.1	233	100	5.2	2.2	148	87	3.3	2	509	123	11.4	2.6	298	97	6.7	2.1	1158	154	25.8	3.1	1061	158	23.7	3.2	468	113	10.4
0500000US21231	21231	Wayne County, Kentucky	8083	343	8083	(X)	5770	324	71.4	3.2	2223	234	27.5	2.6	4331	331	53.6	3.5	1503	215	18.6	2.5	396	121	4.9	1.5	197	90	2.4	1.1	1043	183	12.9	2.2	523	143	6.5	1.8	2313	296	28.6	3.2	2054	298	25.4	3.4	875	229	10.8
0500000US21233	21233	Webster County, Kentucky	5150	177	5150	(X)	3667	226	71.2	3.6	1318	175	25.6	3	2979	207	57.8	3.8	1014	138	19.7	2.6	252	83	4.9	1.6	109	60	2.1	1.2	436	133	8.5	2.5	195	112	3.8	2.1	1483	189	28.8	3.6	1308	174	25.4	3.3	606	116	11.8
0500000US21235	21235	Whitley County, Kentucky	13172	381	13172	(X)	9379	375	71.2	2.3	3758	313	28.5	2.2	6497	426	49.3	3	2351	303	17.8	2.2	1070	250	8.1	1.9	488	182	3.7	1.4	1812	266	13.8	2	919	187	7	1.4	3793	336	28.8	2.3	3281	294	24.9	2	1430	204	10.9
0500000US21237	21237	Wolfe County, Kentucky	2779	179	2779	(X)	1736	212	62.5	5.9	667	171	24	5.7	1281	207	46.1	6.1	454	164	16.3	5.5	73	51	2.6	1.8	34	38	1.2	1.4	382	97	13.7	3.5	179	66	6.4	2.5	1043	169	37.5	5.9	908	168	32.7	6	327	97	11.8
0500000US21239	21239	Woodford County, Kentucky	9698	250	9698	(X)	6606	338	68.1	3.1	2825	290	29.1	2.7	5190	294	53.5	3	2104	270	21.7	2.7	427	128	4.4	1.3	137	63	1.4	0.6	989	197	10.2	1.9	584	154	6	1.5	3092	314	31.9	3.1	2649	285	27.3	2.9	899	145	9.3
0500000US39001	39001	Adams County, Ohio	10816	285	10816	(X)	7729	277	71.5	2	3408	244	31.5	2	5879	312	54.4	2.6	2255	238	20.8	2.1	513	142	4.7	1.3	293	128	2.7	1.2	1337	235	12.4	2.1	860	197	8	1.8	3087	241	28.5	2	2676	246	24.7	2.1	1302	175	12
0500000US39003	39003	Allen County, Ohio	40552	569	40552	(X)	27143	613	66.9	1.4	12128	529	29.9	1.2	19227	524	47.4	1.3	7249	396	17.9	1	1877	276	4.6	0.7	1096	214	2.7	0.5	6039	434	14.9	1	3783	346	9.3	0.8	13409	621	33.1	1.4	11517	561	28.4	1.3	4621	310	11.4
0500000US39005	39005	Ashland County, Ohio	20207	361	20207	(X)	14282	377	70.7	1.7	5638	350	27.9	1.7	11814	382	58.5	1.9	4220	325	20.9	1.6	732	150	3.6	0.7	338	110	1.7	0.5	1736	266	8.6	1.3	1080	223	5.3	1.1	5925	371	29.3	1.7	4913	337	24.3	1.6	2229	273	11
0500000US39007	39007	Ashtabula County, Ohio	38952	491	38952	(X)	25673	559	65.9	1.3	10672	498	27.4	1.2	18848	574	48.4	1.5	6667	435	17.1	1.1	2121	296	5.4	0.8	1292	278	3.3	0.7	4704	399	12.1	1	2713	313	7	0.8	13279	541	34.1	1.3	10932	455	28.1	1.1	4680	297	12
0500000US39009	39009	Athens County, Ohio	22181	496	22181	(X)	12206	394	55	1.6	4779	366	21.5	1.5	9089	419	41	1.8	3095	336	14	1.4	999	157	4.5	0.7	414	109	1.9	0.5	2118	294	9.5	1.3	1270	251	5.7	1.1	9975	475	45	1.6	6838	401	30.8	1.7	1850	220	8.3
0500000US39011	39011	Auglaize County, Ohio	18241	281	18241	(X)	12689	380	69.6	1.8	5055	283	27.7	1.5	10506	360	57.6	1.9	3840	253	21.1	1.3	724	152	4	0.8	387	107	2.1	0.6	1459	228	8	1.2	828	202	4.5	1.1	5552	349	30.4	1.8	4833	302	26.5	1.6	2198	189	12
0500000US39013	39013	Belmont County, Ohio	28329	429	28329	(X)	18356	515	64.8	1.7	6612	310	23.3	1	14239	511	50.3	1.8	4549	329	16.1	1.1	1381	227	4.9	0.8	632	159	2.2	0.6	2736	299	9.7	1.1	1431	204	5.1	0.7	9973	524	35.2	1.7	8807	505	31.1	1.6	3727	287	13.2
0500000US39015	39015	Brown County, Ohio	16380	370	16380	(X)	11943	409	72.9	2	4559	321	27.8	1.8	9421	437	57.5	2.3	3213	302	19.6	1.7	612	142	3.7	0.9	290	100	1.8	0.6	1910	279	11.7	1.7	1056	224	6.4	1.4	4437	353	27.1	2	3792	280	23.2	1.6	1625	207	9.9
0500000US39017	39017	Butler County, Ohio	134612	962	134612	(X)	94581	1020	70.3	0.8	42642	978	31.7	0.7	71953	1110	53.5	0.9	29236	820	21.7	0.6	5980	530	4.4	0.4	2988	402	2.2	0.3	16648	824	12.4	0.6	10418	698	7.7	0.5	40031	1197	29.7	0.8	31994	1168	23.8	0.8	11332	520	8.4
0500000US39019	39019	Carroll County, Ohio	11107	273	11107	(X)	7856	302	70.7	2.3	2863	206	25.8	1.7	6536	318	58.8	2.6	2225	197	20	1.7	489	128	4.4	1.2	210	78	1.9	0.7	831	187	7.5	1.6	428	126	3.9	1.1	3251	277	29.3	2.3	2667	258	24	2.2	1237	163	11.1
0500000US39021	39021	Champaign County, Ohio	15014	310	15014	(X)	10862	354	72.3	1.8	4612	237	30.7	1.4	8621	332	57.4	2	3258	214	21.7	1.4	670	157	4.5	1	456	128	3	0.8	1571	221	10.5	1.4	898	177	6	1.2	4152	282	27.7	1.8	3534	251	23.5	1.6	1523	215	10.1
0500000US39023	39023	Clark County, Ohio	54963	577	54963	(X)	35850	678	65.2	1	15072	529	27.4	0.9	25704	634	46.8	1.1	9112	465	16.6	0.9	2436	306	4.4	0.5	1195	232	2.2	0.4	7710	481	14	0.8	4765	411	8.7	0.7	19113	564	34.8	1	15847	564	28.8	1	6712	384	12.2
0500000US39025	39025	Clermont County, Ohio	73728	635	73728	(X)	53000	771	71.9	1.1	23348	704	31.7	0.9	41550	895	56.4	1.3	16797	614	22.8	0.8	3829	470	5.2	0.6	2047	345	2.8	0.5	7621	526	10.3	0.7	4504	442	6.1	0.6	20728	877	28.1	1.1	17185	804	23.3	1	6310	437	8.6
0500000US39027	39027	Clinton County, Ohio	15969	294	15969	(X)	11342	328	71	1.9	4947	258	31	1.5	8581	393	53.7	2.5	3098	303	19.4	1.9	1042	208	6.5	1.3	767	192	4.8	1.2	1719	277	10.8	1.7	1082	221	6.8	1.4	4627	332	29	1.9	3927	327	24.6	1.9	1883	215	11.8
0500000US39029	39029	Columbiana County, Ohio	42095	507	42095	(X)	28546	730	67.8	1.5	11069	597	26.3	1.3	21900	710	52	1.6	7429	537	17.6	1.3	2126	294	5.1	0.7	1127	241	2.7	0.6	4520	423	10.7	1	2513	301	6	0.7	13549	642	32.2	1.5	11252	635	26.7	1.5	4650	344	11
0500000US39031	39031	Coshocton County, Ohio	14495	288	14495	(X)	10144	366	70	2.3	3880	223	26.8	1.4	7939	359	54.8	2.3	2764	206	19.1	1.4	571	139	3.9	1	247	85	1.7	0.6	1634	255	11.3	1.8	869	170	6	1.2	4351	353	30	2.3	3782	340	26.1	2.2	1706	201	11.8
0500000US39033	39033	Crawford County, Ohio	17655	339	17655	(X)	11839	377	67.1	1.9	4553	300	25.8	1.6	9262	404	52.5	2.1	3039	261	17.2	1.4	734	201	4.2	1.1	473	162	2.7	0.9	1843	237	10.4	1.3	1041	180	5.9	1	5816	361	32.9	1.9	5041	372	28.6	2	2312	220	13.1
0500000US39035	39035	Cuyahoga County, Ohio	534476	2227	534476	(X)	309945	2242	58	0.4	133843	1777	25	0.3	201045	2302	37.6	0.4	75099	1529	14.1	0.3	22453	903	4.2	0.2	9854	651	1.8	0.1	86447	1512	16.2	0.3	48890	1118	9.1	0.2	224531	2509	42	0.4	195456	2448	36.6	0.4	68423	1415	12.8
0500000US39037	39037	Darke County, Ohio	20776	304	20776	(X)	14158	384	68.1	1.9	5727	311	27.6	1.4	11637	341	56	1.8	4269	242	20.5	1.2	694	159	3.3	0.8	316	116	1.5	0.6	1827	231	8.8	1.1	1142	206	5.5	1	6618	424	31.9	1.9	5810	407	28	1.8	2604	238	12.5
0500000US39039	39039	Defiance County, Ohio	15203	297	15203	(X)	10900	369	71.7	2.3	4152	300	27.3	1.9	8236	327	54.2	2.1	2683	244	17.6	1.6	911	168	6	1.1	422	138	2.8	0.9	1753	255	11.5	1.7	1047	196	6.9	1.3	4303	369	28.3	2.3	3599	324	23.7	2	1196	164	7.9
0500000US39041	39041	Delaware County, Ohio	64208	468	64208	(X)	49144	659	76.5	0.9	25909	619	40.4	0.9	42053	738	65.5	1	21204	563	33	0.8	2051	328	3.2	0.5	1274	248	2	0.4	5040	418	7.8	0.7	3431	360	5.3	0.6	15064	559	23.5	0.9	12550	520	19.5	0.8	3820	327	5.9
0500000US39043	39043	Erie County, Ohio	31972	529	31972	(X)	20995	639	65.7	1.8	7915	407	24.8	1.2	15750	571	49.3	1.8	5000	363	15.6	1.2	1433	285	4.5	0.9	725	204	2.3	0.6	3812	349	11.9	1	2190	287	6.8	0.9	10977	639	34.3	1.8	9386	582	29.4	1.7	3838	323	12
0500000US39045	39045	Fairfield County, Ohio	54309	543	54309	(X)	39235	734	72.2	1.2	18472	556	34	1	30842	814	56.8	1.4	13174	484	24.3	0.9	2286	343	4.2	0.6	1403	254	2.6	0.5	6107	430	11.2	0.8	3895	359	7.2	0.7	15074	707	27.8	1.2	12352	635	22.7	1.1	4558	313	8.4
0500000US39047	39047	Fayette County, Ohio	11514	221	11514	(X)	7619	256	66.2	2.3	3379	225	29.3	1.9	5444	274	47.3	2.5	1903	205	16.5	1.8	634	182	5.5	1.6	441	145	3.8	1.3	1541	228	13.4	2	1035	176	9	1.5	3895	294	33.8	2.3	3245	275	28.2	2.2	1352	139	11.7
0500000US39049	39049	Franklin County, Ohio	468295	2183	468295	(X)	273033	2300	58.3	0.4	132863	2050	28.4	0.4	187480	2360	40	0.4	82177	1719	17.5	0.3	19502	913	4.2	0.2	9790	770	2.1	0.2	66051	1514	14.1	0.3	40896	1337	8.7	0.3	195262	2215	41.7	0.4	153143	2067	32.7	0.4	37755	1169	8.1
0500000US39051	39051	Fulton County, Ohio	16285	218	16285	(X)	12049	273	74	1.7	4999	273	30.7	1.6	10006	312	61.4	2	3747	249	23	1.5	728	163	4.5	1	402	123	2.5	0.8	1315	242	8.1	1.5	850	206	5.2	1.2	4236	298	26	1.7	3823	291	23.5	1.7	1576	175	9.7
0500000US39053	39053	Gallia County, Ohio	11576	339	11576	(X)	8249	352	71.3	2.9	3047	259	26.3	2.1	6340	343	54.8	2.9	2137	249	18.5	2.1	676	134	5.8	1.1	330	117	2.9	1	1233	201	10.7	1.7	580	133	5	1.1	3327	373	28.7	2.9	2882	353	24.9	2.7	1438	203	12.4
0500000US39055	39055	Geauga County, Ohio	34621	356	34621	(X)	25748	492	74.4	1.3	10600	396	30.6	1.1	21846	569	63.1	1.5	8747	385	25.3	1.1	1043	214	3	0.6	389	140	1.1	0.4	2859	296	8.3	0.9	1464	270	4.2	0.8	8873	459	25.6	1.3	7529	441	21.7	1.2	3159	315	9.1
0500000US39057	39057	Greene County, Ohio	62836	583	62836	(X)	41855	731	66.6	1	17184	588	27.3	0.9	32774	689	52.2	1	12179	533	19.4	0.8	2183	297	3.5	0.5	1094	212	1.7	0.3	6898	540	11	0.8	3911	447	6.2	0.7	20981	689	33.4	1	17335	692	27.6	1.1	5796	367	9.2
0500000US39059	39059	Guernsey County, Ohio	15690	310	15690	(X)	10736	398	68.4	2	4250	295	27.1	1.7	8104	413	51.7	2.3	2753	297	17.5	1.8	781	174	5	1.1	405	137	2.6	0.9	1851	240	11.8	1.5	1092	181	7	1.1	4954	331	31.6	2	4202	314	26.8	1.9	1930	197	12.3
0500000US39061	39061	Hamilton County, Ohio	327914	1780	327914	(X)	195106	1699	59.5	0.5	88373	1388	27	0.4	131859	1621	40.2	0.5	51200	1250	15.6	0.4	13277	817	4	0.2	6697	642	2	0.2	49970	1154	15.2	0.3	30476	1001	9.3	0.3	132808	1795	40.5	0.5	111879	1737	34.1	0.5	35548	903	10.8
0500000US39063	39063	Hancock County, Ohio	30610	394	30610	(X)	20125	451	65.7	1.5	8487	416	27.7	1.3	15365	489	50.2	1.6	5418	357	17.7	1.2	1446	322	4.7	1.1	1066	269	3.5	0.9	3314	298	10.8	1	2003	280	6.5	0.9	10485	503	34.3	1.5	8984	521	29.3	1.6	3262	331	10.7
0500000US39065	39065	Hardin County, Ohio	11504	315	11504	(X)	7757	349	67.4	2.5	3519	286	30.6	2.3	5866	337	51	2.7	2352	257	20.4	2.1	566	136	4.9	1.2	332	107	2.9	0.9	1325	193	11.5	1.6	835	187	7.3	1.6	3747	307	32.6	2.5	3255	299	28.3	2.5	1249	154	10.9
0500000US39067	39067	Harrison County, Ohio	6395	212	6395	(X)	4402	229	68.8	3.1	1731	168	27.1	2.4	3551	212	55.5	3.1	1205	130	18.8	1.9	252	77	3.9	1.2	146	57	2.3	0.9	599	124	9.4	1.9	380	108	5.9	1.7	1993	222	31.2	3.1	1695	201	26.5	2.9	783	123	12.2
0500000US39069	39069	Henry County, Ohio	11006	218	11006	(X)	7658	283	69.6	2.3	3251	176	29.5	1.5	6133	273	55.7	2.4	2239	159	20.3	1.4	520	109	4.7	1	367	110	3.3	1	1005	159	9.1	1.4	645	146	5.9	1.3	3348	266	30.4	2.3	2766	241	25.1	2.1	1221	161	11.1
0500000US39071	39071	Highland County, Ohio	16918	309	16918	(X)	11682	457	69.1	2.6	5016	338	29.6	1.9	8490	423	50.2	2.4	3139	254	18.6	1.5	1111	237	6.6	1.4	707	194	4.2	1.1	2081	321	12.3	1.9	1170	230	6.9	1.4	5236	469	30.9	2.6	4469	475	26.4	2.7	1950	227	11.5
0500000US39073	39073	Hocking County, Ohio	11478	278	11478	(X)	7964	299	69.4	2.4	3158	233	27.5	2.1	6235	309	54.3	2.7	2265	229	19.7	2.1	452	118	3.9	1	183	67	1.6	0.6	1277	229	11.1	2	710	189	6.2	1.6	3514	306	30.6	2.4	3054	292	26.6	2.4	1235	163	10.8
0500000US39075	39075	Holmes County, Ohio	12467	239	12467	(X)	9945	331	79.8	2.2	5030	255	40.3	1.9	8848	359	71	2.6	4529	255	36.3	1.9	327	123	2.6	1	85	42	0.7	0.3	770	177	6.2	1.4	416	116	3.3	0.9	2522	283	20.2	2.2	2230	259	17.9	2	1003	162	8
0500000US39077	39077	Huron County, Ohio	22361	393	22361	(X)	15795	493	70.6	1.9	6963	366	31.1	1.5	12278	390	54.9	1.8	4809	320	21.5	1.4	1052	217	4.7	0.9	612	171	2.7	0.8	2465	309	11	1.3	1542	214	6.9	0.9	6566	436	29.4	1.9	5269	425	23.6	1.8	2298	224	10.3
0500000US39079	39079	Jackson County, Ohio	13288	325	13288	(X)	8881	370	66.8	2.3	3870	299	29.1	2.1	6204	346	46.7	2.4	2344	277	17.6	2	788	203	5.9	1.5	383	155	2.9	1.2	1889	250	14.2	1.9	1143	190	8.6	1.4	4407	337	33.2	2.3	3777	275	28.4	2	1549	194	11.7
0500000US39081	39081	Jefferson County, Ohio	28326	434	28326	(X)	18655	507	65.9	1.5	6561	347	23.2	1.1	14002	522	49.4	1.7	4288	318	15.1	1.1	1287	225	4.5	0.8	339	113	1.2	0.4	3366	318	11.9	1.1	1934	239	6.8	0.8	9671	438	34.1	1.5	8447	437	29.8	1.5	4088	250	14.4
0500000US39083	39083	Knox County, Ohio	22583	360	22583	(X)	15695	480	69.5	1.7	6680	377	29.6	1.5	12883	477	57	1.8	4918	329	21.8	1.4	797	185	3.5	0.8	427	113	1.9	0.5	2015	240	8.9	1.1	1335	240	5.9	1.1	6888	391	30.5	1.7	5733	383	25.4	1.7	2519	281	11.2
0500000US39085	39085	Lake County, Ohio	94048	700	94048	(X)	61436	965	65.3	0.9	24913	607	26.5	0.6	47487	900	50.5	0.9	17806	559	18.9	0.6	3810	425	4.1	0.5	1818	303	1.9	0.3	10139	631	10.8	0.7	5289	491	5.6	0.5	32612	917	34.7	0.9	27621	860	29.4	0.9	10952	515	11.6
0500000US39087	39087	Lawrence County, Ohio	24009	390	24009	(X)	16480	478	68.6	1.8	6149	417	25.6	1.7	11781	489	49.1	2	3832	366	16	1.5	1292	279	5.4	1.1	682	194	2.8	0.8	3407	360	14.2	1.5	1635	267	6.8	1.1	7529	454	31.4	1.8	6522	434	27.2	1.7	2960	276	12.3
0500000US39089	39089	Licking County, Ohio	64009	546	64009	(X)	45087	838	70.4	1.1	19642	580	30.7	0.9	35273	806	55.1	1.2	13541	538	21.2	0.8	3097	399	4.8	0.6	1948	320	3	0.5	6717	511	10.5	0.8	4153	407	6.5	0.6	18922	745	29.6	1.1	15651	649	24.5	1	5944	403	9.3
0500000US39091	39091	Logan County, Ohio	18143	435	18143	(X)	12572	414	69.3	1.9	5082	344	28	1.8	9346	402	51.5	2.3	3140	300	17.3	1.6	1074	189	5.9	1	589	136	3.2	0.7	2152	268	11.9	1.4	1353	216	7.5	1.2	5571	403	30.7	1.9	4539	377	25	1.8	1853	231	10.2
0500000US39093	39093	Lorain County, Ohio	116705	885	116705	(X)	80346	886	68.8	0.8	33482	688	28.7	0.6	58857	906	50.4	0.8	21415	666	18.3	0.6	5434	505	4.7	0.4	2506	356	2.1	0.3	16055	717	13.8	0.6	9561	614	8.2	0.5	36359	1037	31.2	0.8	30930	958	26.5	0.7	11576	549	9.9
0500000US39095	39095	Lucas County, Ohio	178101	1329	178101	(X)	107863	1606	60.6	0.8	48490	1276	27.2	0.6	71023	1311	39.9	0.7	27214	868	15.3	0.5	8475	562	4.8	0.3	4294	504	2.4	0.3	28365	1018	15.9	0.6	16982	872	9.5	0.5	70238	1559	39.4	0.8	58477	1524	32.8	0.8	18950	755	10.6
0500000US39097	39097	Madison County, Ohio	14611	262	14611	(X)	10233	330	70	2.1	4433	243	30.3	1.5	8277	375	56.6	2.6	3430	229	23.5	1.5	589	167	4	1.1	241	98	1.6	0.7	1367	223	9.4	1.5	762	188	5.2	1.3	4378	336	30	2.1	3749	315	25.7	2	1658	188	11.3
0500000US39099	39099	Mahoning County, Ohio	98201	837	98201	(X)	61683	1017	62.8	0.9	24124	720	24.6	0.7	42575	1003	43.4	0.9	14202	602	14.5	0.6	4476	396	4.6	0.4	2054	301	2.1	0.3	14632	674	14.9	0.7	7868	484	8	0.5	36518	939	37.2	0.9	32164	924	32.8	0.9	13668	614	13.9
0500000US39101	39101	Marion County, Ohio	24578	479	24578	(X)	16891	426	68.7	1.6	6654	354	27.1	1.4	12624	375	51.4	1.5	4115	285	16.7	1.1	1385	246	5.6	1	792	188	3.2	0.8	2882	287	11.7	1.2	1747	264	7.1	1.1	7687	475	31.3	1.6	6512	433	26.5	1.6	2971	253	12.1
0500000US39103	39103	Medina County, Ohio	65499	516	65499	(X)	48306	651	73.8	0.9	21150	514	32.3	0.7	39932	653	61	0.9	16615	467	25.4	0.7	2583	326	3.9	0.5	1331	272	2	0.4	5791	461	8.8	0.7	3204	347	4.9	0.5	17193	612	26.2	0.9	13987	529	21.4	0.8	5764	379	8.8
0500000US39105	39105	Meigs County, Ohio	9560	254	9560	(X)	6573	246	68.8	2.4	2373	189	24.8	1.9	4965	242	51.9	2.6	1562	169	16.3	1.8	504	132	5.3	1.4	273	98	2.9	1	1104	155	11.5	1.6	538	122	5.6	1.2	2987	266	31.2	2.4	2489	256	26	2.4	955	136	10
0500000US39107	39107	Mercer County, Ohio	15851	271	15851	(X)	11452	341	72.2	1.9	4842	284	30.5	1.6	9489	352	59.9	2.2	3779	224	23.8	1.4	734	152	4.6	1	376	126	2.4	0.8	1229	205	7.8	1.3	687	172	4.3	1.1	4399	319	27.8	1.9	3796	295	23.9	1.8	1885	206	11.9
0500000US39109	39109	Miami County, Ohio	41239	488	41239	(X)	28104	601	68.1	1.4	11473	448	27.8	1	21775	520	52.8	1.3	7522	449	18.2	1.1	1955	311	4.7	0.7	1290	262	3.1	0.6	4374	436	10.6	1.1	2661	374	6.5	0.9	13135	639	31.9	1.4	10878	585	26.4	1.3	4447	374	10.8
0500000US39111	39111	Monroe County, Ohio	6111	241	6111	(X)	4258	236	69.7	2.6	1583	170	25.9	2.2	3405	197	55.7	2.6	1114	133	18.2	1.9	344	91	5.6	1.4	234	83	3.8	1.3	509	95	8.3	1.5	235	70	3.8	1.1	1853	176	30.3	2.6	1598	162	26.1	2.4	814	100	13.3
0500000US39113	39113	Montgomery County, Ohio	222578	1262	222578	(X)	134907	1374	60.6	0.6	58368	1056	26.2	0.4	90905	1475	40.8	0.7	32830	1046	14.7	0.5	9935	691	4.5	0.3	5641	581	2.5	0.3	34067	1110	15.3	0.5	19897	878	8.9	0.4	87671	1540	39.4	0.6	75591	1608	34	0.6	27793	967	12.5
0500000US39115	39115	Morgan County, Ohio	6204	237	6204	(X)	4453	234	71.8	2.6	1607	159	25.9	2.1	3532	236	56.9	3.1	1115	157	18	2.3	252	83	4.1	1.3	129	59	2.1	0.9	669	129	10.8	2	363	90	5.9	1.4	1751	177	28.2	2.6	1508	167	24.3	2.5	654	121	10.5
0500000US39117	39117	Morrow County, Ohio	12940	276	12940	(X)	9753	405	75.4	2.6	4025	304	31.1	2.3	7760	447	60	3.2	2927	303	22.6	2.3	817	197	6.3	1.5	452	168	3.5	1.3	1176	222	9.1	1.7	646	178	5	1.4	3187	334	24.6	2.6	2588	314	20	2.4	1229	194	9.5
0500000US39119	39119	Muskingum County, Ohio	33976	444	33976	(X)	22973	452	67.6	1.2	9896	403	29.1	1.1	16634	477	49	1.4	5922	389	17.4	1.1	1577	221	4.6	0.7	935	214	2.8	0.6	4762	407	14	1.2	3039	296	8.9	0.9	11003	466	32.4	1.2	9001	469	26.5	1.3	3898	330	11.5
0500000US39121	39121	Noble County, Ohio	4883	223	4883	(X)	3436	209	70.4	3.7	733	146	15	2.8	2797	214	57.3	4	450	135	9.2	2.6	149	68	3.1	1.4	43	28	0.9	0.6	490	138	10	2.8	240	95	4.9	1.9	1447	208	29.6	3.7	1370	208	28.1	3.7	684	160	14
0500000US39123	39123	Ottawa County, Ohio	17614	372	17614	(X)	12200	341	69.3	1.5	4061	233	23.1	1.2	9886	339	56.1	1.7	2919	214	16.6	1.2	809	177	4.6	1	398	130	2.3	0.7	1505	222	8.5	1.2	744	167	4.2	0.9	5414	311	30.7	1.5	4696	308	26.7	1.6	2220	215	12.6
0500000US39125	39125	Paulding County, Ohio	7730	193	7730	(X)	5432	211	70.3	2.4	2187	148	28.3	1.8	4366	225	56.5	2.5	1624	143	21	1.7	414	103	5.4	1.4	235	76	3	1	652	110	8.4	1.4	328	79	4.2	1	2298	200	29.7	2.4	2003	213	25.9	2.6	976	118	12.6
0500000US39127	39127	Perry County, Ohio	13793	277	13793	(X)	10030	399	72.7	2.7	4252	269	30.8	1.9	7659	422	55.5	2.9	2827	280	20.5	2	682	190	4.9	1.4	385	124	2.8	0.9	1689	221	12.2	1.6	1040	191	7.5	1.4	3763	383	27.3	2.7	3279	348	23.8	2.4	1167	181	8.5
0500000US39129	39129	Pickaway County, Ohio	19167	360	19167	(X)	14217	397	74.2	1.8	6130	375	32	1.7	11308	382	59	2	4329	314	22.6	1.5	863	184	4.5	1	682	177	3.6	0.9	2046	248	10.7	1.3	1119	241	5.8	1.2	4950	372	25.8	1.8	4084	373	21.3	1.8	1945	230	10.1
0500000US39131	39131	Pike County, Ohio	10859	300	10859	(X)	7586	294	69.9	2.5	3253	258	30	2.2	5281	314	48.6	2.9	1937	219	17.8	2	683	178	6.3	1.6	423	166	3.9	1.5	1622	222	14.9	2	893	183	8.2	1.7	3273	303	30.1	2.5	2721	304	25.1	2.6	1244	167	11.5
0500000US39133	39133	Portage County, Ohio	60992	802	60992	(X)	40312	818	66.1	1.1	16404	640	26.9	0.9	30860	710	50.6	1	11087	474	18.2	0.7	2321	311	3.8	0.5	951	200	1.6	0.3	7131	540	11.7	0.9	4366	513	7.2	0.8	20680	750	33.9	1.1	15661	658	25.7	1	4825	389	7.9
0500000US39135	39135	Preble County, Ohio	16238	305	16238	(X)	11644	318	71.7	1.9	4702	223	29	1.3	9222	373	56.8	2.3	3408	236	21	1.4	623	117	3.8	0.7	368	90	2.3	0.6	1799	201	11.1	1.2	926	167	5.7	1	4594	340	28.3	1.9	3895	335	24	1.9	1702	185	10.5
0500000US39137	39137	Putnam County, Ohio	13022	169	13022	(X)	9630	246	74	1.7	4213	215	32.4	1.6	8252	248	63.4	1.8	3489	208	26.8	1.6	453	123	3.5	0.9	241	73	1.9	0.6	925	157	7.1	1.2	483	141	3.7	1.1	3392	234	26	1.7	2923	260	22.4	2	1539	142	11.8
0500000US39139	39139	Richland County, Ohio	48458	624	48458	(X)	31166	601	64.3	1.2	12545	502	25.9	1	23215	656	47.9	1.4	7843	435	16.2	0.9	1698	238	3.5	0.5	911	189	1.9	0.4	6253	544	12.9	1.1	3791	382	7.8	0.8	17292	693	35.7	1.2	15240	722	31.4	1.3	6572	394	13.6
0500000US39141	39141	Ross County, Ohio	28308	505	28308	(X)	19193	523	67.8	1.5	8107	433	28.6	1.4	14541	519	51.4	1.7	5358	396	18.9	1.3	1154	211	4.1	0.7	551	153	1.9	0.5	3498	342	12.4	1.2	2198	278	7.8	1	9115	461	32.2	1.5	7622	398	26.9	1.3	3134	254	11.1
0500000US39143	39143	Sandusky County, Ohio	23906	295	23906	(X)	16440	408	68.8	1.5	6782	351	28.4	1.4	12607	439	52.7	1.8	4591	336	19.2	1.4	1159	217	4.8	0.9	628	178	2.6	0.7	2674	283	11.2	1.2	1563	233	6.5	1	7466	380	31.2	1.5	6396	350	26.8	1.4	2824	224	11.8
0500000US39145	39145	Scioto County, Ohio	29452	478	29452	(X)	19186	595	65.1	1.7	7410	437	25.2	1.3	14649	534	49.7	1.7	4861	349	16.5	1.1	1236	262	4.2	0.9	783	211	2.7	0.7	3301	276	11.2	0.9	1766	287	6	0.9	10266	536	34.9	1.7	8679	531	29.5	1.7	3643	312	12.4
0500000US39147	39147	Seneca County, Ohio	21651	392	21651	(X)	15110	414	69.8	1.7	6215	304	28.7	1.3	11530	401	53.3	1.7	4075	274	18.8	1.2	1012	193	4.7	0.9	542	126	2.5	0.6	2568	256	11.9	1.2	1598	226	7.4	1	6541	398	30.2	1.7	5396	345	24.9	1.5	2488	215	11.5
0500000US39149	39149	Shelby County, Ohio	18311	328	18311	(X)	13253	405	72.4	1.8	5869	330	32.1	1.6	10481	395	57.2	2.2	4190	291	22.9	1.6	976	208	5.3	1.1	630	165	3.4	0.9	1796	298	9.8	1.6	1049	234	5.7	1.2	5058	330	27.6	1.8	4168	298	22.8	1.5	1639	170	9
0500000US39151	39151	Stark County, Ohio	150003	1030	150003	(X)	99208	1166	66.1	0.7	40269	904	26.8	0.6	73808	1264	49.2	0.8	25761	827	17.2	0.5	7094	514	4.7	0.3	3881	437	2.6	0.3	18306	838	12.2	0.6	10627	722	7.1	0.5	50795	1250	33.9	0.7	43494	1152	29	0.7	16864	735	11.2
0500000US39153	39153	Summit County, Ohio	220375	1289	220375	(X)	138430	1195	62.8	0.5	58799	1086	26.7	0.5	100766	1385	45.7	0.6	38406	961	17.4	0.4	8705	661	4	0.3	3760	490	1.7	0.2	28959	979	13.1	0.4	16633	787	7.5	0.4	81945	1276	37.2	0.5	69439	1160	31.5	0.5	24887	728	11.3
0500000US39155	39155	Trumbull County, Ohio	86246	789	86246	(X)	55634	835	64.5	0.9	20998	618	24.3	0.7	39758	931	46.1	1.1	12600	586	14.6	0.7	4297	415	5	0.5	1779	289	2.1	0.3	11579	608	13.4	0.7	6619	445	7.7	0.5	30612	885	35.5	0.9	26665	857	30.9	0.9	11352	600	13.2
0500000US39157	39157	Tuscarawas County, Ohio	36149	465	36149	(X)	25091	505	69.4	1.3	9851	455	27.3	1.2	19998	507	55.3	1.5	6961	403	19.3	1.1	1460	245	4	0.7	737	214	2	0.6	3633	362	10.1	1	2153	330	6	0.9	11058	537	30.6	1.3	9476	465	26.2	1.2	4423	299	12.2
0500000US39159	39159	Union County, Ohio	18216	353	18216	(X)	13380	436	73.5	2.4	6833	332	37.5	1.8	10919	450	59.9	2.5	5311	313	29.2	1.7	715	198	3.9	1.1	437	165	2.4	0.9	1746	264	9.6	1.5	1085	239	6	1.3	4836	480	26.5	2.4	4087	449	22.4	2.3	1314	216	7.2
0500000US39161	39161	Van Wert County, Ohio	11442	206	11442	(X)	7933	257	69.3	1.9	3034	210	26.5	1.7	6455	269	56.4	2.3	2341	203	20.5	1.7	398	111	3.5	0.9	173	72	1.5	0.6	1080	172	9.4	1.5	520	109	4.5	1	3509	234	30.7	1.9	3115	244	27.2	2.1	1409	155	12.3
0500000US39163	39163	Vinton County, Ohio	5191	209	5191	(X)	3674	215	70.8	3.2	1450	162	27.9	2.9	2767	200	53.3	3.5	960	145	18.5	2.7	232	99	4.5	1.9	156	84	3	1.6	675	129	13	2.4	334	98	6.4	1.9	1517	185	29.2	3.2	1295	153	24.9	2.7	580	91	11.2
0500000US39165	39165	Warren County, Ohio	76546	657	76546	(X)	58384	802	76.3	0.9	27873	668	36.4	0.8	49119	871	64.2	1	22208	668	29	0.8	2863	430	3.7	0.6	1633	347	2.1	0.5	6402	450	8.4	0.6	4032	402	5.3	0.5	18162	700	23.7	0.9	14926	699	19.5	0.9	5692	460	7.4
0500000US39167	39167	Washington County, Ohio	25029	349	25029	(X)	16431	443	65.6	1.8	5963	296	23.8	1.1	13283	477	53.1	2	4439	294	17.7	1.2	806	168	3.2	0.7	447	127	1.8	0.5	2342	266	9.4	1	1077	174	4.3	0.7	8598	508	34.4	1.8	7366	473	29.4	1.7	2817	345	11.3
0500000US39169	39169	Wayne County, Ohio	42487	412	42487	(X)	30045	491	70.7	1	12349	437	29.1	1	24586	601	57.9	1.3	9424	354	22.2	0.8	1572	235	3.7	0.6	697	170	1.6	0.4	3887	369	9.1	0.9	2228	284	5.2	0.7	12442	445	29.3	1	10711	454	25.2	1	4455	302	10.5
0500000US39171	39171	Williams County, Ohio	14947	269	14947	(X)	10160	308	68	1.9	4195	255	28.1	1.7	8013	323	53.6	2.2	2943	189	19.7	1.3	699	138	4.7	0.9	419	114	2.8	0.8	1448	201	9.7	1.3	833	162	5.6	1.1	4787	310	32	1.9	4051	296	27.1	1.9	1787	174	12
0500000US39173	39173	Wood County, Ohio	49086	651	49086	(X)	31329	667	63.8	1.3	13566	450	27.6	0.9	24996	716	50.9	1.4	9563	413	19.5	0.8	1685	245	3.4	0.5	1019	181	2.1	0.4	4648	434	9.5	0.9	2984	375	6.1	0.8	17757	744	36.2	1.3	13478	693	27.5	1.3	4521	281	9.2
0500000US39175	39175	Wyandot County, Ohio	9284	145	9284	(X)	6138	238	66.1	2.4	2648	160	28.5	1.7	4925	254	53	2.7	1936	182	20.9	1.9	333	89	3.6	1	147	65	1.6	0.7	880	179	9.5	1.9	565	131	6.1	1.4	3146	235	33.9	2.4	2628	228	28.3	2.4	1097	145	11.8
0500000US42001	42001	Adams County, Pennsylvania	38141	398	38141	(X)	27482	463	72.1	1.1	10739	328	28.2	0.8	22235	533	58.3	1.4	7847	368	20.6	1	1685	218	4.4	0.6	855	162	2.2	0.4	3562	356	9.3	0.9	2037	273	5.3	0.7	10659	463	27.9	1.1	8768	425	23	1.1	3885	296	10.2
0500000US42003	42003	Allegheny County, Pennsylvania	526004	2089	526004	(X)	304369	2213	57.9	0.4	122371	1709	23.3	0.3	223528	2276	42.5	0.4	82512	1342	15.7	0.2	18867	842	3.6	0.2	8080	579	1.5	0.1	61974	1450	11.8	0.3	31779	1127	6	0.2	221635	2740	42.1	0.4	186187	2663	35.4	0.4	70093	1460	13.3
0500000US42005	42005	Armstrong County, Pennsylvania	28525	365	28525	(X)	19424	445	68.1	1.3	7097	286	24.9	0.9	15073	412	52.8	1.3	4807	227	16.9	0.7	1557	212	5.5	0.7	829	171	2.9	0.6	2794	241	9.8	0.8	1461	163	5.1	0.6	9101	406	31.9	1.3	8041	387	28.2	1.3	4229	274	14.8
0500000US42007	42007	Beaver County, Pennsylvania	70867	598	70867	(X)	46783	642	66	0.8	16629	522	23.5	0.7	35604	639	50.2	0.9	11256	401	15.9	0.5	2979	325	4.2	0.5	1136	191	1.6	0.3	8200	464	11.6	0.6	4237	354	6	0.5	24084	672	34	0.8	21146	599	29.8	0.7	9726	478	13.7
0500000US42009	42009	Bedford County, Pennsylvania	20198	228	20198	(X)	14168	314	70.1	1.5	5032	207	24.9	1	11345	315	56.2	1.6	3572	191	17.7	0.9	914	166	4.5	0.8	477	118	2.4	0.6	1909	208	9.5	1	983	153	4.9	0.7	6030	315	29.9	1.5	5346	328	26.5	1.6	2643	206	13.1
0500000US42011	42011	Berks County, Pennsylvania	153897	807	153897	(X)	105671	863	68.7	0.5	45920	858	29.8	0.6	79511	1085	51.7	0.7	30333	855	19.7	0.6	7860	607	5.1	0.4	4343	415	2.8	0.3	18300	636	11.9	0.4	11244	496	7.3	0.3	48226	905	31.3	0.5	38457	920	25	0.6	16290	620	10.6
0500000US42013	42013	Blair County, Pennsylvania	51433	496	51433	(X)	33328	602	64.8	1.1	12988	495	25.3	1	25182	603	49	1.1	8602	392	16.7	0.8	2311	273	4.5	0.5	1233	221	2.4	0.4	5835	447	11.3	0.9	3153	333	6.1	0.6	18105	643	35.2	1.1	15484	592	30.1	1.1	7081	389	13.8
0500000US42015	42015	Bradford County, Pennsylvania	24213	292	24213	(X)	16738	297	69.1	1.2	6193	211	25.6	0.9	13152	312	54.3	1.2	4226	214	17.5	0.9	1249	154	5.2	0.6	642	102	2.7	0.4	2337	218	9.7	0.9	1325	184	5.5	0.8	7475	328	30.9	1.2	6302	310	26	1.2	2831	199	11.7
0500000US42017	42017	Bucks County, Pennsylvania	230366	892	230366	(X)	165708	1332	71.9	0.5	68266	1237	29.6	0.5	135663	1619	58.9	0.7	54413	1251	23.6	0.5	8384	702	3.6	0.3	3428	428	1.5	0.2	21661	970	9.4	0.4	10425	712	4.5	0.3	64658	1187	28.1	0.5	54838	1210	23.8	0.5	22909	865	9.9
0500000US42019	42019	Butler County, Pennsylvania	73213	641	73213	(X)	50064	618	68.4	1	21251	512	29	0.7	41525	645	56.7	1	16583	545	22.7	0.8	2349	248	3.2	0.3	1170	213	1.6	0.3	6190	436	8.5	0.6	3498	375	4.8	0.5	23149	823	31.6	1	19321	758	26.4	0.9	7946	379	10.9
0500000US42021	42021	Cambria County, Pennsylvania	58208	653	58208	(X)	37228	667	64	1.1	13594	396	23.4	0.6	28196	625	48.4	1.1	9121	327	15.7	0.6	2690	256	4.6	0.4	1245	210	2.1	0.4	6342	433	10.9	0.7	3228	285	5.5	0.5	20980	718	36	1.1	18204	714	31.3	1.1	8653	485	14.9
0500000US42023	42023	Cameron County, Pennsylvania	2144	90	2144	(X)	1340	92	62.5	3.5	436	59	20.3	2.3	1069	74	49.9	3.2	254	51	11.8	2.3	100	38	4.7	1.7	54	29	2.5	1.4	171	48	8	2.1	128	42	6	1.9	804	85	37.5	3.5	691	88	32.2	3.7	352	64	16.4
0500000US42025	42025	Carbon County, Pennsylvania	25903	508	25903	(X)	17872	466	69	1.5	6580	377	25.4	1.4	13726	465	53	1.7	4265	346	16.5	1.3	1228	201	4.7	0.8	628	178	2.4	0.7	2918	309	11.3	1.2	1687	233	6.5	0.9	8031	444	31	1.5	6615	453	25.5	1.6	3133	294	12.1
0500000US42027	42027	Centre County, Pennsylvania	57197	675	57197	(X)	32597	571	57	1.1	13023	438	22.8	0.8	26890	602	47	1.2	9974	396	17.4	0.7	2085	304	3.6	0.5	955	199	1.7	0.3	3622	401	6.3	0.7	2094	298	3.7	0.5	24600	832	43	1.1	15657	835	27.4	1.3	4808	341	8.4
0500000US42029	42029	Chester County, Pennsylvania	184788	770	184788	(X)	130385	1048	70.6	0.5	61504	965	33.3	0.5	108816	1062	58.9	0.5	50343	897	27.2	0.5	6117	460	3.3	0.2	3100	346	1.7	0.2	15452	706	8.4	0.4	8061	503	4.4	0.3	54403	964	29.4	0.5	43907	996	23.8	0.5	16841	614	9.1
0500000US42031	42031	Clarion County, Pennsylvania	15776	268	15776	(X)	10090	252	64	1.6	3969	190	25.2	1.2	8031	228	50.9	1.5	2822	156	17.9	1	718	106	4.6	0.7	370	84	2.3	0.5	1341	149	8.5	0.9	777	142	4.9	0.9	5686	299	36	1.6	4356	255	27.6	1.5	1955	159	12.4
0500000US42033	42033	Clearfield County, Pennsylvania	32192	451	32192	(X)	21512	566	66.8	1.4	8219	439	25.5	1.2	16982	472	52.8	1.3	5667	344	17.6	1	1449	269	4.5	0.8	766	224	2.4	0.7	3081	311	9.6	0.9	1786	286	5.5	0.9	10680	479	33.2	1.4	9442	431	29.3	1.3	4327	301	13.4
0500000US42035	42035	Clinton County, Pennsylvania	15067	263	15067	(X)	9698	289	64.4	1.9	3626	194	24.1	1.3	7522	275	49.9	1.8	2450	194	16.3	1.3	567	122	3.8	0.8	323	74	2.1	0.5	1609	201	10.7	1.3	853	160	5.7	1.1	5369	316	35.6	1.9	4274	281	28.4	1.7	1898	186	12.6
0500000US42037	42037	Columbia County, Pennsylvania	26225	397	26225	(X)	16717	404	63.7	1.5	6465	309	24.7	1.2	13002	395	49.6	1.4	4400	252	16.8	0.9	1120	154	4.3	0.6	547	113	2.1	0.4	2595	247	9.9	1	1518	205	5.8	0.8	9508	457	36.3	1.5	7096	394	27.1	1.5	3336	272	12.7
0500000US42039	42039	Crawford County, Pennsylvania	34831	487	34831	(X)	23012	466	66.1	1.3	8684	329	24.9	0.9	18076	425	51.9	1.3	5881	233	16.9	0.7	1455	210	4.2	0.6	816	162	2.3	0.5	3481	314	10	0.9	1987	237	5.7	0.7	11819	519	33.9	1.3	9950	465	28.6	1.2	4160	294	11.9
0500000US42041	42041	Cumberland County, Pennsylvania	95286	702	95286	(X)	61683	919	64.7	0.9	25245	655	26.5	0.7	50029	938	52.5	0.9	18573	657	19.5	0.7	3624	407	3.8	0.4	1983	304	2.1	0.3	8030	562	8.4	0.6	4689	474	4.9	0.5	33603	873	35.3	0.9	28091	871	29.5	0.9	10802	501	11.3
0500000US42043	42043	Dauphin County, Pennsylvania	108831	829	108831	(X)	67882	1107	62.4	0.8	28801	775	26.5	0.7	48473	908	44.5	0.8	17701	665	16.3	0.6	4908	500	4.5	0.5	2721	429	2.5	0.4	14501	743	13.3	0.7	8379	584	7.7	0.5	40949	936	37.6	0.8	33997	897	31.2	0.8	11346	563	10.4
0500000US42045	42045	Delaware County, Pennsylvania	204771	1062	204771	(X)	137038	1263	66.9	0.6	61510	1077	30	0.5	98183	1108	47.9	0.5	41694	959	20.4	0.5	9432	563	4.6	0.3	4073	421	2	0.2	29423	871	14.4	0.4	15743	675	7.7	0.3	67733	1353	33.1	0.6	57930	1291	28.3	0.6	23559	782	11.5
0500000US42047	42047	Elk County, Pennsylvania	13478	247	13478	(X)	8923	312	66.2	2.3	3365	196	25	1.4	6805	272	50.5	2.1	2160	191	16	1.4	659	140	4.9	1	318	106	2.4	0.8	1459	216	10.8	1.6	887	172	6.6	1.3	4555	336	33.8	2.3	4186	318	31.1	2.1	1843	208	13.7
0500000US42049	42049	Erie County, Pennsylvania	109675	860	109675	(X)	69788	835	63.6	0.8	29107	611	26.5	0.5	51198	887	46.7	0.9	18005	530	16.4	0.5	4698	379	4.3	0.3	2579	322	2.4	0.3	13892	732	12.7	0.7	8523	608	7.8	0.5	39887	992	36.4	0.8	33173	921	30.2	0.7	12286	453	11.2
0500000US42051	42051	Fayette County, Pennsylvania	54363	652	54363	(X)	35194	822	64.7	1.2	12854	559	23.6	0.9	25928	781	47.7	1.2	8398	465	15.4	0.8	2622	282	4.8	0.5	1179	192	2.2	0.4	6644	360	12.2	0.7	3277	288	6	0.5	19169	654	35.3	1.2	16644	619	30.6	1.1	7906	416	14.5
0500000US42053	42053	Forest County, Pennsylvania	2001	453	2001	(X)	1189	273	59.4	3.6	191	147	9.5	5.3	1012	217	50.6	3.5	112	88	5.6	3.2	28	33	1.4	1.3	7	23	0.3	1	149	48	7.4	1.9	72	49	3.6	1.9	812	202	40.6	3.6	695	153	34.7	3.5	369	55	18.4
0500000US42055	42055	Franklin County, Pennsylvania	58273	584	58273	(X)	39765	730	68.2	1.1	16620	576	28.5	0.9	32071	745	55	1.2	11866	552	20.4	0.9	2299	304	3.9	0.5	1358	241	2.3	0.4	5395	380	9.3	0.6	3396	355	5.8	0.6	18508	701	31.8	1.1	15780	696	27.1	1.1	6902	475	11.8
0500000US42057	42057	Fulton County, Pennsylvania	5965	119	5965	(X)	4230	117	70.9	1.7	1518	89	25.4	1.4	3409	123	57.2	2.1	1109	86	18.6	1.4	312	56	5.2	0.9	182	50	3.1	0.8	509	75	8.5	1.2	227	50	3.8	0.8	1735	115	29.1	1.7	1409	102	23.6	1.6	631	65	10.6
0500000US42059	42059	Greene County, Pennsylvania	14417	307	14417	(X)	9520	322	66	1.9	3678	164	25.5	1.1	7342	328	50.9	2.1	2585	176	17.9	1.2	612	145	4.2	1	287	107	2	0.7	1566	169	10.9	1.2	806	151	5.6	1	4897	300	34	1.9	4012	269	27.8	1.7	2013	167	14
0500000US42061	42061	Huntingdon County, Pennsylvania	17193	342	17193	(X)	11722	316	68.2	1.5	4399	238	25.6	1.2	9443	247	54.9	1.4	3159	174	18.4	0.9	769	145	4.5	0.8	435	97	2.5	0.6	1510	189	8.8	1.1	805	158	4.7	0.9	5471	291	31.8	1.5	4888	274	28.4	1.4	2324	175	13.5
0500000US42063	42063	Indiana County, Pennsylvania	34310	492	34310	(X)	21857	471	63.7	1.3	8150	339	23.8	0.9	17587	448	51.3	1.3	6025	292	17.6	0.8	1319	211	3.8	0.6	621	114	1.8	0.3	2951	283	8.6	0.8	1504	220	4.4	0.6	12453	533	36.3	1.3	9560	501	27.9	1.4	3814	287	11.1
0500000US42065	42065	Jefferson County, Pennsylvania	18503	259	18503	(X)	12282	211	66.4	1.1	4606	177	24.9	0.9	9688	248	52.4	1.3	3140	151	17	0.8	764	110	4.1	0.6	335	73	1.8	0.4	1830	130	9.9	0.7	1131	123	6.1	0.6	6221	244	33.6	1.1	5462	221	29.5	1	2626	151	14.2
0500000US42067	42067	Juniata County, Pennsylvania	9248	210	9248	(X)	6580	230	71.2	2.1	2420	151	26.2	1.5	5456	215	59	2.2	1852	136	20	1.4	365	86	3.9	0.9	186	63	2	0.7	759	138	8.2	1.4	382	80	4.1	0.8	2668	207	28.8	2.1	2222	190	24	1.9	1075	141	11.6
0500000US42069	42069	Lackawanna County, Pennsylvania	85769	777	85769	(X)	54388	827	63.4	0.9	21761	569	25.4	0.6	39862	822	46.5	0.9	14630	533	17.1	0.6	3778	357	4.4	0.4	1555	282	1.8	0.3	10748	604	12.5	0.7	5576	431	6.5	0.5	31381	875	36.6	0.9	26903	781	31.4	0.8	11836	559	13.8
0500000US42071	42071	Lancaster County, Pennsylvania	194082	877	194082	(X)	136782	1266	70.5	0.6	56971	1002	29.4	0.5	112527	1446	58	0.7	43586	960	22.5	0.5	7025	591	3.6	0.3	3434	480	1.8	0.2	17230	649	8.9	0.3	9951	582	5.1	0.3	57300	1161	29.5	0.6	47004	1203	24.2	0.6	20268	838	10.4
0500000US42073	42073	Lawrence County, Pennsylvania	36823	424	36823	(X)	24769	452	67.3	1.1	9526	380	25.9	1	18514	418	50.3	1.1	6200	365	16.8	1	1599	215	4.3	0.6	647	152	1.8	0.4	4656	321	12.6	0.9	2679	245	7.3	0.7	12054	459	32.7	1.1	10692	423	29	1	5005	269	13.6
0500000US42075	42075	Lebanon County, Pennsylvania	52023	462	52023	(X)	36337	765	69.8	1.4	14995	608	28.8	1.1	28648	756	55.1	1.4	10440	571	20.1	1.1	2373	321	4.6	0.6	1245	264	2.4	0.5	5316	458	10.2	0.9	3310	349	6.4	0.7	15686	721	30.2	1.4	13350	665	25.7	1.2	6014	371	11.6
0500000US42077	42077	Lehigh County, Pennsylvania	133289	806	133289	(X)	89929	1178	67.5	0.8	39588	956	29.7	0.7	66493	1066	49.9	0.8	26396	811	19.8	0.6	6304	620	4.7	0.5	3086	478	2.3	0.4	17132	811	12.9	0.6	10106	554	7.6	0.4	43360	1082	32.5	0.8	35740	1116	26.8	0.8	14448	629	10.8
0500000US42079	42079	Luzerne County, Pennsylvania	130880	860	130880	(X)	83178	996	63.6	0.7	32099	797	24.5	0.6	58881	958	45	0.7	19716	717	15.1	0.5	6799	532	5.2	0.4	2850	381	2.2	0.3	17498	669	13.4	0.5	9533	505	7.3	0.4	47702	1044	36.4	0.7	41569	992	31.8	0.7	19044	615	14.6
0500000US42081	42081	Lycoming County, Pennsylvania	46046	539	46046	(X)	29847	598	64.8	1.2	11668	423	25.3	0.9	22913	566	49.8	1.1	7579	375	16.5	0.8	2079	293	4.5	0.6	1124	194	2.4	0.4	4855	377	10.5	0.8	2965	315	6.4	0.7	16199	596	35.2	1.2	12960	541	28.1	1.1	5481	349	11.9
0500000US42083	42083	McKean County, Pennsylvania	17450	313	17450	(X)	11462	322	65.7	1.7	4536	226	26	1.2	8184	276	46.9	1.6	2596	202	14.9	1.1	1127	190	6.5	1.1	667	145	3.8	0.8	2151	205	12.3	1.2	1273	156	7.3	0.9	5988	325	34.3	1.7	5221	297	29.9	1.6	2219	177	12.7
0500000US42085	42085	Mercer County, Pennsylvania	46187	550	46187	(X)	30551	564	66.1	1.1	11744	423	25.4	0.8	23505	533	50.9	1.1	7959	371	17.2	0.8	1679	227	3.6	0.5	874	175	1.9	0.4	5367	359	11.6	0.7	2911	289	6.3	0.6	15636	545	33.9	1.1	13900	558	30.1	1.1	6332	336	13.7
0500000US42087	42087	Mifflin County, Pennsylvania	18711	344	18711	(X)	12606	375	67.4	1.8	4967	246	26.5	1.2	9731	299	52	1.6	3443	199	18.4	1.1	788	199	4.2	1.1	459	177	2.5	0.9	2087	273	11.2	1.4	1065	167	5.7	0.9	6105	378	32.6	1.8	5076	345	27.1	1.7	2525	239	13.5
0500000US42089	42089	Monroe County, Pennsylvania	58875	918	58875	(X)	43483	1060	73.9	1.2	18552	859	31.5	1.3	32808	1110	55.7	1.6	12682	769	21.5	1.2	3024	420	5.1	0.7	1726	322	2.9	0.5	7651	674	13	1.1	4144	567	7	0.9	15392	720	26.1	1.2	11899	685	20.2	1.2	4650	409	7.9
0500000US42091	42091	Montgomery County, Pennsylvania	307488	1276	307488	(X)	208752	1540	67.9	0.4	92951	1283	30.2	0.4	169978	2008	55.3	0.6	73447	1278	23.9	0.4	10588	700	3.4	0.2	5064	459	1.6	0.1	28186	992	9.2	0.3	14440	732	4.7	0.2	98736	1363	32.1	0.4	83053	1534	27	0.5	33954	937	11
0500000US42093	42093	Montour County, Pennsylvania	7233	191	7233	(X)	4786	193	66.2	2.7	1740	125	24.1	1.7	3914	184	54.1	2.6	1338	117	18.5	1.6	245	82	3.4	1.1	156	69	2.2	0.9	627	124	8.7	1.7	246	77	3.4	1.1	2447	227	33.8	2.7	2172	188	30	2.2	938	136	13
0500000US42095	42095	Northampton County, Pennsylvania	112189	786	112189	(X)	77529	1011	69.1	0.8	31822	799	28.4	0.7	60473	1010	53.9	0.8	23230	768	20.7	0.7	4640	449	4.1	0.4	2077	324	1.9	0.3	12416	662	11.1	0.6	6515	477	5.8	0.4	34660	898	30.9	0.8	28175	914	25.1	0.8	12921	525	11.5
0500000US42097	42097	Northumberland County, Pennsylvania	39348	506	39348	(X)	25777	460	65.5	1.2	9597	350	24.4	0.8	19742	426	50.2	1.1	6389	303	16.2	0.8	1592	224	4	0.6	667	145	1.7	0.4	4443	332	11.3	0.9	2541	277	6.5	0.7	13571	546	34.5	1.2	11738	525	29.8	1.2	5260	305	13.4
0500000US42099	42099	Perry County, Pennsylvania	18173	247	18173	(X)	13061	327	71.9	1.6	5223	204	28.7	1.1	10649	357	58.6	1.9	3742	226	20.6	1.2	727	140	4	0.8	385	107	2.1	0.6	1685	162	9.3	0.9	1096	145	6	0.8	5112	297	28.1	1.6	3950	252	21.7	1.3	1588	128	8.7
0500000US42101	42101	Philadelphia County, Pennsylvania	580017	2572	580017	(X)	308924	3069	53.3	0.5	134999	2155	23.3	0.3	160248	2688	27.6	0.4	61021	1670	10.5	0.3	30344	1171	5.2	0.2	12452	811	2.1	0.1	118332	2088	20.4	0.4	61526	1581	10.6	0.3	271093	2876	46.7	0.5	228672	2657	39.4	0.4	67978	1590	11.7
0500000US42103	42103	Pike County, Pennsylvania	21581	553	21581	(X)	15528	570	72	2.2	6101	392	28.3	1.6	12349	559	57.2	2.3	4411	347	20.4	1.5	1022	207	4.7	0.9	540	176	2.5	0.8	2157	255	10	1.2	1150	211	5.3	1	6053	514	28	2.2	5112	476	23.7	2.1	2024	257	9.4
0500000US42105	42105	Potter County, Pennsylvania	7077	189	7077	(X)	4800	191	67.8	2	1623	112	22.9	1.3	3831	159	54.1	1.8	1142	100	16.1	1.3	354	68	5	0.9	171	49	2.4	0.7	615	78	8.7	1.1	310	57	4.4	0.8	2277	158	32.2	2	1979	148	28	1.9	924	88	13.1
0500000US42107	42107	Schuylkill County, Pennsylvania	59658	632	59658	(X)	39176	622	65.7	1	14949	362	25.1	0.6	29140	600	48.8	1	10036	406	16.8	0.7	3290	283	5.5	0.5	1564	207	2.6	0.3	6746	375	11.3	0.6	3349	281	5.6	0.5	20482	701	34.3	1	17445	682	29.2	1	8221	429	13.8
0500000US42109	42109	Snyder County, Pennsylvania	14397	262	14397	(X)	10421	275	72.4	1.4	4137	185	28.7	1.1	8439	284	58.6	1.8	3005	175	20.9	1.1	695	110	4.8	0.8	430	108	3	0.8	1287	207	8.9	1.4	702	148	4.9	1	3976	216	27.6	1.4	3218	207	22.4	1.4	1581	131	11
0500000US42111	42111	Somerset County, Pennsylvania	29791	392	29791	(X)	20615	363	69.2	1.2	7250	299	24.3	0.9	17146	379	57.6	1.3	5615	259	18.8	0.8	1144	169	3.8	0.6	579	120	1.9	0.4	2325	238	7.8	0.8	1056	153	3.5	0.5	9176	430	30.8	1.2	8088	404	27.1	1.2	4121	268	13.8
0500000US42113	42113	Sullivan County, Pennsylvania	2402	124	2402	(X)	1528	101	63.6	2.8	466	72	19.4	2.7	1295	93	53.9	3.2	348	58	14.5	2.3	101	38	4.2	1.5	58	31	2.4	1.3	132	36	5.5	1.4	60	26	2.5	1	874	82	36.4	2.8	785	81	32.7	2.8	372	62	15.5
0500000US42115	42115	Susquehanna County, Pennsylvania	17163	278	17163	(X)	11782	281	68.6	1.3	4142	178	24.1	0.9	9264	254	54	1.3	2901	166	16.9	0.9	839	97	4.9	0.6	390	75	2.3	0.4	1679	158	9.8	0.9	851	128	5	0.7	5381	248	31.4	1.3	4460	241	26	1.3	1908	131	11.1
0500000US42117	42117	Tioga County, Pennsylvania	17058	1073	17058	(X)	11753	634	68.9	1.6	4328	294	25.4	1.2	9182	427	53.8	2	2916	209	17.1	1.2	865	121	5.1	0.7	462	87	2.7	0.5	1706	267	10	1.2	950	170	5.6	0.8	5305	516	31.1	1.6	4315	464	25.3	1.6	1963	240	11.5
0500000US42119	42119	Union County, Pennsylvania	15062	466	15062	(X)	10255	442	68.1	2	4197	324	27.9	1.9	8169	378	54.2	2.1	2878	253	19.1	1.6	693	187	4.6	1.2	496	156	3.3	1	1393	257	9.2	1.6	823	218	5.5	1.4	4807	337	31.9	2	3674	320	24.4	2.1	1586	178	10.5
0500000US42121	42121	Venango County, Pennsylvania	22547	314	22547	(X)	15124	345	67.1	1.4	5629	257	25	1.1	11511	277	51.1	1.3	3457	209	15.3	0.9	1063	161	4.7	0.7	590	140	2.6	0.6	2550	232	11.3	1	1582	192	7	0.8	7423	345	32.9	1.4	6526	339	28.9	1.4	2759	233	12.2
0500000US42123	42123	Warren County, Pennsylvania	17257	257	17257	(X)	11223	329	65	1.7	3737	214	21.7	1.1	9154	308	53	1.8	2757	183	16	1	636	104	3.7	0.6	287	73	1.7	0.4	1433	160	8.3	0.9	693	126	4	0.7	6034	318	35	1.7	5237	288	30.3	1.6	2312	181	13.4
0500000US42125	42125	Washington County, Pennsylvania	84098	568	84098	(X)	55569	791	66.1	0.9	21416	600	25.5	0.7	44086	793	52.4	0.9	15932	555	18.9	0.6	3011	326	3.6	0.4	1302	202	1.5	0.2	8472	449	10.1	0.5	4182	352	5	0.4	28529	810	33.9	0.9	24223	770	28.8	0.9	11054	468	13.1
0500000US42127	42127	Wayne County, Pennsylvania	19558	490	19558	(X)	13399	505	68.5	1.8	4749	267	24.3	1.1	10901	462	55.7	1.9	3321	231	17	1.1	844	170	4.3	0.9	466	128	2.4	0.6	1654	222	8.5	1.1	962	186	4.9	0.9	6159	379	31.5	1.8	5260	338	26.9	1.7	2369	246	12.1
0500000US42129	42129	Westmoreland County, Pennsylvania	152109	890	152109	(X)	101612	1097	66.8	0.7	36576	773	24	0.5	79930	999	52.5	0.7	25750	694	16.9	0.5	5734	396	3.8	0.3	2532	305	1.7	0.2	15948	622	10.5	0.4	8294	504	5.5	0.3	50497	1184	33.2	0.7	43920	1095	28.9	0.7	20283	770	13.3
0500000US42131	42131	Wyoming County, Pennsylvania	10992	193	10992	(X)	7487	225	68.1	1.6	2714	174	24.7	1.5	5802	200	52.8	1.6	1851	133	16.8	1.2	583	106	5.3	0.9	281	76	2.6	0.7	1102	114	10	1	582	90	5.3	0.8	3505	187	31.9	1.6	2812	172	25.6	1.5	1239	102	11.3
0500000US42133	42133	York County, Pennsylvania	167592	789	167592	(X)	117774	1121	70.3	0.7	49725	1045	29.7	0.6	92081	1209	54.9	0.7	34586	1011	20.6	0.6	7388	476	4.4	0.3	4091	378	2.4	0.2	18305	832	10.9	0.5	11048	619	6.6	0.4	49818	1161	29.7	0.7	41046	996	24.5	0.6	17019	668	10.2
0500000US51001	51001	Accomack County, Virginia	14333	620	14333	(X)	9277	544	64.7	3.1	3020	324	21.1	1.9	6763	475	47.2	3	1852	251	12.9	1.6	656	177	4.6	1.2	248	111	1.7	0.8	1858	279	13	1.8	920	203	6.4	1.4	5056	527	35.3	3.1	4290	500	29.9	3.1	1770	229	12.3
0500000US51003	51003	Albemarle County, Virginia	37964	700	37964	(X)	24504	641	64.5	1.4	10389	466	27.4	1.1	20370	611	53.7	1.4	8129	403	21.4	1	908	209	2.4	0.5	430	152	1.1	0.4	3226	350	8.5	0.9	1830	288	4.8	0.8	13460	597	35.5	1.4	11227	555	29.6	1.4	4016	376	10.6
0500000US51005	51005	Alleghany County, Virginia	6773	195	6773	(X)	4556	234	67.3	3.2	1461	138	21.6	1.9	3762	204	55.5	2.9	1135	127	16.8	1.9	309	87	4.6	1.3	114	51	1.7	0.8	485	105	7.2	1.5	212	73	3.1	1.1	2217	234	32.7	3.2	1941	209	28.7	3	1100	147	16.2
0500000US51007	51007	Amelia County, Virginia	4808	210	4808	(X)	3622	259	75.3	4.5	1389	212	28.9	4.1	2834	256	58.9	5.3	927	191	19.3	3.9	185	99	3.8	2	110	66	2.3	1.4	603	199	12.5	4	352	165	7.3	3.4	1186	227	24.7	4.5	998	201	20.8	4	390	116	8.1
0500000US51009	51009	Amherst County, Virginia	12680	259	12680	(X)	8570	349	67.6	2.6	3222	278	25.4	2.1	6181	396	48.7	3.1	2003	232	15.8	1.8	521	155	4.1	1.2	261	134	2.1	1.1	1868	278	14.7	2.2	958	203	7.6	1.6	4110	346	32.4	2.6	3547	332	28	2.4	1441	189	11.4
0500000US51011	51011	Appomattox County, Virginia	5803	236	5803	(X)	4273	213	73.6	2.9	1575	194	27.1	3	3143	222	54.2	3.7	1022	186	17.6	3.1	406	111	7	1.9	142	64	2.4	1.1	724	168	12.5	2.7	411	137	7.1	2.3	1530	193	26.4	2.9	1325	175	22.8	2.7	743	117	12.8
0500000US51013	51013	Arlington County, Virginia	94454	1031	94454	(X)	43512	1047	46.1	1	18268	624	19.3	0.6	34726	950	36.8	1	14470	548	15.3	0.6	3021	436	3.2	0.5	909	206	1	0.2	5765	503	6.1	0.5	2889	367	3.1	0.4	50942	1192	53.9	1	38256	1090	40.5	1	6335	396	6.7
0500000US51015	51015	Augusta County, Virginia	27999	490	27999	(X)	20511	593	73.3	1.8	7679	422	27.4	1.4	16589	698	59.2	2.2	5660	482	20.2	1.7	1323	286	4.7	1	628	215	2.2	0.8	2599	390	9.3	1.4	1391	294	5	1.1	7488	533	26.7	1.8	6536	462	23.3	1.5	3105	356	11.1
0500000US51017	51017	Bath County, Virginia	2101	196	2101	(X)	1355	139	64.5	8.1	541	152	25.7	8.1	1104	180	52.5	8.8	383	145	18.2	7.1	104	104	5	5	54	81	2.6	3.9	147	107	7	5.2	104	88	5	4.3	746	218	35.5	8.1	677	213	32.2	8.1	194	100	9.2
0500000US51019	51019	Bedford County, Virginia	27233	463	27233	(X)	19905	602	73.1	1.8	7443	417	27.3	1.4	16600	601	61	1.9	5575	365	20.5	1.2	1038	236	3.8	0.9	451	161	1.7	0.6	2267	346	8.3	1.3	1417	312	5.2	1.1	7328	505	26.9	1.8	6118	471	22.5	1.7	2706	298	9.9
0500000US51021	51021	Bland County, Virginia	2480	186	2480	(X)	1772	189	71.5	5.4	619	116	25	4.2	1372	167	55.3	5.9	505	98	20.4	3.7	90	60	3.6	2.4	18	19	0.7	0.7	310	113	12.5	4.3	96	70	3.9	2.8	708	144	28.5	5.4	654	138	26.4	5.3	306	95	12.3
0500000US51023	51023	Botetourt County, Virginia	12825	305	12825	(X)	10037	335	78.3	2.1	3315	266	25.8	1.8	8682	365	67.7	2.7	2789	254	21.7	1.8	273	109	2.1	0.8	84	47	0.7	0.4	1082	213	8.4	1.6	442	136	3.4	1.1	2788	285	21.7	2.1	2413	280	18.8	2.1	1053	195	8.2
0500000US51025	51025	Brunswick County, Virginia	5826	381	5826	(X)	3943	332	67.7	3.6	1165	210	20	3	2679	283	46	4.2	715	161	12.3	2.5	262	115	4.5	1.9	56	45	1	0.8	1002	190	17.2	3.1	394	149	6.8	2.5	1883	246	32.3	3.6	1691	233	29	3.4	730	121	12.5
0500000US51027	51027	Buchanan County, Virginia	9485	287	9485	(X)	6711	349	70.8	2.9	2481	249	26.2	2.3	5116	366	53.9	3.8	1636	228	17.2	2.3	426	150	4.5	1.6	150	81	1.6	0.9	1169	211	12.3	2.1	695	173	7.3	1.8	2774	285	29.2	2.9	2401	244	25.3	2.5	1047	181	11
0500000US51029	51029	Buckingham County, Virginia	5817	426	5817	(X)	4230	383	72.7	4.2	1539	258	26.5	3.3	2841	264	48.8	3.9	844	200	14.5	3	327	152	5.6	2.4	223	129	3.8	2.1	1062	188	18.3	3	472	128	8.1	2.2	1587	281	27.3	4.2	1360	256	23.4	3.9	607	140	10.4
0500000US51031	51031	Campbell County, Virginia	21774	407	21774	(X)	15458	421	71	1.8	5923	384	27.2	1.7	11655	558	53.5	2.5	3903	361	17.9	1.6	924	242	4.2	1.1	495	181	2.3	0.8	2879	409	13.2	1.9	1525	334	7	1.5	6316	440	29	1.8	5410	399	24.8	1.7	2075	264	9.5
0500000US51033	51033	Caroline County, Virginia	10680	281	10680	(X)	7820	380	73.2	2.9	3180	312	29.8	2.7	5426	375	50.8	3.1	2011	261	18.8	2.3	716	189	6.7	1.8	281	135	2.6	1.3	1678	254	15.7	2.4	888	217	8.3	2	2860	322	26.8	2.9	2245	261	21	2.4	900	211	8.4
0500000US51035	51035	Carroll County, Virginia	12572	431	12572	(X)	8613	391	68.5	2.7	3046	349	24.2	2.4	6682	388	53.1	3.1	2032	284	16.2	2.1	684	172	5.4	1.4	356	125	2.8	1	1247	250	9.9	1.9	658	208	5.2	1.6	3959	392	31.5	2.7	3618	366	28.8	2.6	1728	247	13.7
0500000US51036	51036	Charles City County, Virginia	2850	79	2850	(X)	1869	124	65.6	3.9	526	90	18.5	3	1337	107	46.9	3.5	338	71	11.9	2.4	134	45	4.7	1.6	50	31	1.8	1.1	398	70	14	2.4	138	47	4.8	1.6	981	113	34.4	3.9	862	113	30.2	3.9	380	74	13.3
0500000US51037	51037	Charlotte County, Virginia	4751	255	4751	(X)	3314	257	69.8	3.7	1130	171	23.8	3.3	2282	239	48	4.6	649	137	13.7	2.9	298	109	6.3	2.3	155	81	3.3	1.7	734	166	15.4	3.2	326	108	6.9	2.1	1437	189	30.2	3.7	1226	162	25.8	3.4	640	115	13.5
0500000US51041	51041	Chesterfield County, Virginia	113637	862	113637	(X)	83188	1119	73.2	0.8	39515	909	34.8	0.7	64058	1162	56.4	1	28617	825	25.2	0.7	4699	501	4.1	0.4	2619	386	2.3	0.3	14431	844	12.7	0.7	8279	608	7.3	0.5	30449	988	26.8	0.8	25851	941	22.7	0.8	8439	448	7.4
0500000US51043	51043	Clarke County, Virginia	5580	172	5580	(X)	4098	243	73.4	4	1452	159	26	2.6	3466	227	62.1	4	1141	143	20.4	2.5	139	72	2.5	1.3	67	44	1.2	0.8	493	127	8.8	2.2	244	100	4.4	1.8	1482	233	26.6	4	1090	195	19.5	3.4	348	112	6.2
0500000US51045	51045	Craig County, Virginia	2122	187	2122	(X)	1472	162	69.4	7.4	555	130	26.2	5.8	1251	168	59	8.3	417	134	19.7	6.5	71	89	3.3	4.1	58	88	2.7	4.1	150	111	7.1	5.2	80	80	3.8	3.7	650	185	30.6	7.4	579	181	27.3	7.3	265	101	12.5
0500000US51047	51047	Culpeper County, Virginia	16039	352	16039	(X)	11959	411	74.6	2.6	5395	347	33.6	2.1	9337	458	58.2	2.9	3829	357	23.9	2.2	861	233	5.4	1.4	517	171	3.2	1.1	1761	308	11	1.9	1049	258	6.5	1.6	4080	454	25.4	2.6	3349	418	20.9	2.4	1369	232	8.5
0500000US51049	51049	Cumberland County, Virginia	4049	175	4049	(X)	2723	232	67.3	5.2	908	144	22.4	3.5	1920	273	47.4	6.4	600	153	14.8	3.7	230	104	5.7	2.6	148	89	3.7	2.2	573	156	14.2	3.9	160	88	4	2.2	1326	222	32.7	5.2	1139	229	28.1	5.4	461	156	11.4
0500000US51051	51051	Dickenson County, Virginia	6352	201	6352	(X)	4526	258	71.3	3.6	1531	163	24.1	2.2	3409	261	53.7	3.9	1010	136	15.9	2	329	114	5.2	1.8	156	79	2.5	1.2	788	158	12.4	2.5	365	106	5.7	1.6	1826	240	28.7	3.6	1651	226	26	3.4	628	140	9.9
0500000US51053	51053	Dinwiddie County, Virginia	9932	276	9932	(X)	7241	360	72.9	3.2	3015	283	30.4	2.7	5224	389	52.6	3.7	1943	258	19.6	2.5	397	114	4	1.1	163	84	1.6	0.8	1620	270	16.3	2.7	909	207	9.2	2.1	2691	339	27.1	3.2	2304	303	23.2	2.9	756	149	7.6
0500000US51057	51057	Essex County, Virginia	4286	181	4286	(X)	2735	216	63.8	4.6	953	135	22.2	2.8	2131	197	49.7	4.6	664	114	15.5	2.6	178	79	4.2	1.8	86	54	2	1.2	426	116	9.9	2.7	203	68	4.7	1.5	1551	214	36.2	4.6	1277	202	29.8	4.5	603	138	14.1
0500000US51059	51059	Fairfax County, Virginia	389908	1205	389908	(X)	277250	1779	71.1	0.4	135524	1479	34.8	0.4	226627	2363	58.1	0.6	111053	1617	28.5	0.4	15096	996	3.9	0.3	5983	605	1.5	0.2	35527	1474	9.1	0.4	18488	1121	4.7	0.3	112658	1561	28.9	0.4	88693	1349	22.7	0.3	24448	915	6.3
0500000US51061	51061	Fauquier County, Virginia	23130	305	23130	(X)	17205	446	74.4	1.6	7213	361	31.2	1.5	14361	484	62.1	2	5744	389	24.8	1.6	898	224	3.9	1	438	142	1.9	0.6	1946	308	8.4	1.3	1031	217	4.5	0.9	5925	385	25.6	1.6	4750	351	20.5	1.5	1955	231	8.5
0500000US51063	51063	Floyd County, Virginia	6086	461	6086	(X)	4126	314	67.8	5	1458	216	24	3.2	3583	294	58.9	5.5	1261	195	20.7	3.1	104	72	1.7	1.2	48	38	0.8	0.6	439	154	7.2	2.4	149	77	2.4	1.2	1960	385	32.2	5	1600	369	26.3	5.2	680	182	11.2
0500000US51065	51065	Fluvanna County, Virginia	9462	272	9462	(X)	6937	303	73.3	2.8	2578	260	27.2	2.5	5710	288	60.3	3.1	1989	222	21	2.2	273	104	2.9	1.1	87	63	0.9	0.7	954	214	10.1	2.2	502	170	5.3	1.8	2525	288	26.7	2.8	2147	254	22.7	2.4	864	172	9.1
0500000US51067	51067	Franklin County, Virginia	23358	477	23358	(X)	16857	566	72.2	2	6231	457	26.7	1.8	13789	580	59	2.3	4608	366	19.7	1.5	755	181	3.2	0.8	359	156	1.5	0.7	2313	350	9.9	1.4	1264	271	5.4	1.1	6501	505	27.8	2	5552	482	23.8	2	2486	293	10.6
0500000US51069	51069	Frederick County, Virginia	29172	402	29172	(X)	21660	492	74.2	1.6	9653	477	33.1	1.6	17651	515	60.5	1.7	7462	408	25.6	1.4	1126	242	3.9	0.8	567	192	1.9	0.7	2883	375	9.9	1.3	1624	295	5.6	1	7512	504	25.8	1.6	5645	411	19.4	1.3	2221	279	7.6
0500000US51071	51071	Giles County, Virginia	7167	222	7167	(X)	4823	233	67.3	2.9	1591	181	22.2	2.4	3586	234	50	3.2	1127	178	15.7	2.4	315	117	4.4	1.6	134	83	1.9	1.2	922	170	12.9	2.3	330	96	4.6	1.3	2344	235	32.7	2.9	2052	234	28.6	3	1013	156	14.1
0500000US51073	51073	Gloucester County, Virginia	13889	377	13889	(X)	10266	409	73.9	2.2	4017	325	28.9	1.9	8147	411	58.7	2.4	3001	292	21.6	1.8	605	177	4.4	1.3	289	110	2.1	0.8	1514	276	10.9	1.9	727	218	5.2	1.5	3623	320	26.1	2.2	2971	312	21.4	2.3	1329	216	9.6
0500000US51075	51075	Goochland County, Virginia	8058	240	8058	(X)	6394	303	79.3	3	2050	222	25.4	2.6	5710	251	70.9	2.8	1767	181	21.9	2.1	187	96	2.3	1.2	30	30	0.4	0.4	497	153	6.2	1.9	253	115	3.1	1.4	1664	249	20.7	3	1468	243	18.2	2.9	563	139	7
0500000US51077	51077	Grayson County, Virginia	6618	252	6618	(X)	4378	255	66.2	3.4	1451	166	21.9	2.3	3287	249	49.7	3.7	872	149	13.2	2.2	304	107	4.6	1.6	157	87	2.4	1.3	787	161	11.9	2.4	422	132	6.4	2	2240	252	33.8	3.4	1956	231	29.6	3.2	925	134	14
0500000US51079	51079	Greene County, Virginia	6897	663	6897	(X)	4974	540	72.1	3.7	2039	378	29.6	3.5	4012	398	58.2	4.2	1480	255	21.5	2.8	285	161	4.1	2	151	108	2.2	1.3	677	191	9.8	2.3	408	160	5.9	2.2	1923	322	27.9	3.7	1443	301	20.9	3.9	297	100	4.3
0500000US51081	51081	Greensville County, Virginia	3389	570	3389	(X)	2545	447	75.1	4.1	932	227	27.5	3.8	1626	365	48	5.6	485	180	14.3	3.6	213	124	6.3	2.9	78	69	2.3	1.8	706	144	20.8	5.1	369	120	10.9	3.8	844	202	24.9	4.1	712	179	21	3.7	449	104	13.2
0500000US51083	51083	Halifax County, Virginia	14770	447	14770	(X)	9658	391	65.4	2.4	3649	295	24.7	1.9	6722	357	45.5	2.5	2004	246	13.6	1.6	512	168	3.5	1.1	246	112	1.7	0.8	2424	276	16.4	1.8	1399	203	9.5	1.3	5112	416	34.6	2.4	4826	405	32.7	2.3	2422	258	16.4
0500000US51085	51085	Hanover County, Virginia	36927	359	36927	(X)	27946	572	75.7	1.5	12205	386	33.1	1	23005	539	62.3	1.5	9716	394	26.3	1.1	1382	247	3.7	0.7	727	173	2	0.5	3559	370	9.6	1	1762	238	4.8	0.6	8981	558	24.3	1.5	7446	540	20.2	1.4	3041	324	8.2
0500000US51087	51087	Henrico County, Virginia	123683	897	123683	(X)	79990	1219	64.7	0.9	38417	888	31.1	0.7	56761	1150	45.9	0.9	25274	890	20.4	0.7	4594	506	3.7	0.4	2322	367	1.9	0.3	18635	965	15.1	0.8	10821	746	8.7	0.6	43693	1183	35.3	0.9	36402	1164	29.4	0.9	12423	563	10
0500000US51089	51089	Henry County, Virginia	22690	497	22690	(X)	15386	579	67.8	1.9	5493	392	24.2	1.6	11005	562	48.5	2.2	3228	291	14.2	1.3	1051	216	4.6	0.9	402	133	1.8	0.6	3330	361	14.7	1.5	1863	302	8.2	1.3	7304	437	32.2	1.9	6723	435	29.6	1.9	3055	264	13.5
0500000US51091	51091	Highland County, Virginia	1006	82	1006	(X)	757	67	75.2	6.5	109	49	10.8	4.9	658	72	65.4	6.7	95	50	9.4	5	19	16	1.9	1.6	5	6	0.5	0.6	80	41	8	4.1	9	13	0.9	1.3	249	77	24.8	6.5	221	69	22	5.9	135	55	13.4
0500000US51093	51093	Isle of Wight County, Virginia	13560	247	13560	(X)	10191	346	75.2	2.2	3875	265	28.6	1.8	8295	361	61.2	2.6	2858	217	21.1	1.6	458	124	3.4	0.9	217	83	1.6	0.6	1438	192	10.6	1.4	800	155	5.9	1.1	3369	307	24.8	2.2	2946	267	21.7	1.9	1172	177	8.6
0500000US51095	51095	James City County, Virginia	26883	478	26883	(X)	19337	543	71.9	1.8	6715	395	25	1.4	15735	541	58.5	1.9	4890	327	18.2	1.2	802	233	3	0.9	324	131	1.2	0.5	2800	336	10.4	1.2	1501	277	5.6	1	7546	529	28.1	1.8	6323	519	23.5	1.9	3051	304	11.3
0500000US51097	51097	King and Queen County, Virginia	2863	155	2863	(X)	2012	171	70.3	5	575	114	20.1	3.7	1671	164	58.4	4.9	502	115	17.5	3.8	98	59	3.4	2.1	0	17	0	1.2	243	76	8.5	2.7	73	52	2.5	1.8	851	153	29.7	5	755	147	26.4	4.8	403	92	14.1
0500000US51099	51099	King George County, Virginia	8314	248	8314	(X)	6034	268	72.6	3.3	2964	239	35.7	2.8	4913	275	59.1	3.4	2161	235	26	2.8	288	94	3.5	1.1	149	75	1.8	0.9	833	180	10	2.1	654	182	7.9	2.2	2280	301	27.4	3.3	1806	274	21.7	3.1	512	127	6.2
0500000US51101	51101	King William County, Virginia	5998	176	5998	(X)	4584	237	76.4	3.2	2135	206	35.6	3.1	3549	246	59.2	3.7	1588	214	26.5	3.5	247	105	4.1	1.8	129	78	2.2	1.3	788	165	13.1	2.7	418	141	7	2.3	1414	195	23.6	3.2	1215	187	20.3	3.1	473	127	7.9
0500000US51103	51103	Lancaster County, Virginia	5182	270	5182	(X)	3142	257	60.6	3.4	903	150	17.4	2.4	2440	223	47.1	3.4	458	110	8.8	2	162	80	3.1	1.5	142	78	2.7	1.5	540	115	10.4	2.2	303	101	5.8	1.9	2040	189	39.4	3.4	1940	191	37.4	3.4	1207	141	23.3
0500000US51105	51105	Lee County, Virginia	9653	393	9653	(X)	6604	360	68.4	2.8	2420	262	25.1	2.3	4849	348	50.2	3.2	1695	238	17.6	2.3	692	171	7.2	1.7	277	122	2.9	1.3	1063	218	11	2.2	448	137	4.6	1.4	3049	309	31.6	2.8	2799	320	29	2.9	1323	182	13.7
0500000US51107	51107	Loudoun County, Virginia	106997	728	106997	(X)	83146	1031	77.7	0.8	49491	830	46.3	0.7	69998	1107	65.4	1	42222	820	39.5	0.8	3855	518	3.6	0.5	2091	370	2	0.3	9293	731	8.7	0.7	5178	538	4.8	0.5	23851	916	22.3	0.8	18297	722	17.1	0.7	4589	393	4.3
0500000US51109	51109	Louisa County, Virginia	13046	386	13046	(X)	9398	390	72	2.4	3512	256	26.9	1.9	7331	369	56.2	2.7	2451	242	18.8	1.9	710	172	5.4	1.3	318	135	2.4	1	1357	237	10.4	1.7	743	182	5.7	1.4	3648	351	28	2.4	2979	298	22.8	2.1	1133	193	8.7
0500000US51111	51111	Lunenburg County, Virginia	4572	305	4572	(X)	3033	261	66.3	3.4	987	179	21.6	3.2	2215	235	48.4	3.9	617	149	13.5	2.8	249	101	5.4	2	88	57	1.9	1.2	569	126	12.4	2.8	282	83	6.2	1.8	1539	180	33.7	3.4	1377	165	30.1	3.2	742	105	16.2
0500000US51113	51113	Madison County, Virginia	5024	216	5024	(X)	3528	285	70.2	4.7	1185	195	23.6	3.5	2862	272	57	4.7	931	179	18.5	3.3	190	85	3.8	1.7	80	63	1.6	1.3	476	169	9.5	3.4	174	79	3.5	1.6	1496	242	29.8	4.7	1173	219	23.3	4.3	550	129	10.9
0500000US51115	51115	Mathews County, Virginia	3856	275	3856	(X)	2880	325	74.7	5.5	850	204	22	4.4	2198	277	57	5.6	513	155	13.3	3.7	268	124	7	3.2	119	81	3.1	2	414	142	10.7	3.5	218	102	5.7	2.5	976	210	25.3	5.5	888	203	23	5.4	518	159	13.4
0500000US51117	51117	Mecklenburg County, Virginia	12650	412	12650	(X)	7934	376	62.7	2.4	2633	254	20.8	1.7	5786	306	45.7	2.4	1620	187	12.8	1.4	495	141	3.9	1.1	268	134	2.1	1	1653	219	13.1	1.6	745	170	5.9	1.3	4716	365	37.3	2.4	4294	354	33.9	2.4	2177	241	17.2
0500000US51119	51119	Middlesex County, Virginia	4400	262	4400	(X)	2986	293	67.9	4.5	831	183	18.9	3.6	2439	252	55.4	4.5	610	167	13.9	3.5	181	80	4.1	1.8	58	45	1.3	1	366	109	8.3	2.3	163	67	3.7	1.5	1414	196	32.1	4.5	1292	198	29.4	4.5	721	148	16.4
0500000US51121	51121	Montgomery County, Virginia	34789	539	34789	(X)	19187	502	55.2	1.4	8105	400	23.3	1.1	15483	522	44.5	1.5	6006	354	17.3	1	1034	236	3	0.7	607	177	1.7	0.5	2670	398	7.7	1.1	1492	267	4.3	0.8	15602	593	44.8	1.4	9514	601	27.3	1.7	2468	278	7.1
0500000US51125	51125	Nelson County, Virginia	6404	312	6404	(X)	4163	289	65	4.1	1339	250	20.9	3.8	2943	275	46	3.9	765	189	11.9	2.9	223	106	3.5	1.6	23	33	0.4	0.5	997	221	15.6	3.5	551	183	8.6	2.9	2241	308	35	4.1	1931	298	30.2	4.2	840	202	13.1
0500000US51127	51127	New Kent County, Virginia	6886	208	6886	(X)	5288	265	76.8	3.3	1887	209	27.4	2.9	4355	301	63.2	3.8	1386	209	20.1	2.9	267	110	3.9	1.6	86	73	1.2	1.1	666	190	9.7	2.8	415	163	6	2.4	1598	235	23.2	3.3	1339	225	19.4	3.2	576	134	8.4
0500000US51131	51131	Northampton County, Virginia	5149	255	5149	(X)	2984	258	58	3.9	873	138	17	2.4	2170	234	42.1	3.8	538	110	10.4	2	124	60	2.4	1.1	36	35	0.7	0.7	690	103	13.4	2	299	90	5.8	1.7	2165	219	42	3.9	1857	203	36.1	3.6	877	140	17
0500000US51133	51133	Northumberland County, Virginia	5691	340	5691	(X)	3793	351	66.6	4.9	1037	224	18.2	3.4	3141	256	55.2	4.3	705	168	12.4	2.7	102	86	1.8	1.5	39	46	0.7	0.8	550	149	9.7	2.3	293	134	5.1	2.2	1898	305	33.4	4.9	1652	273	29	4.3	872	182	15.3
0500000US51135	51135	Nottoway County, Virginia	5673	255	5673	(X)	3722	255	65.6	4.1	1504	221	26.5	3.6	2458	291	43.3	5.1	925	209	16.3	3.5	517	146	9.1	2.5	188	95	3.3	1.7	747	150	13.2	2.6	391	114	6.9	2	1951	262	34.4	4.1	1686	210	29.7	3.3	849	156	15
0500000US51137	51137	Orange County, Virginia	12621	349	12621	(X)	9425	382	74.7	2.8	3531	264	28	2	7233	433	57.3	3.5	2347	244	18.6	1.9	737	193	5.8	1.5	449	153	3.6	1.2	1455	210	11.5	1.6	735	204	5.8	1.6	3196	387	25.3	2.8	2691	355	21.3	2.6	1114	198	8.8
0500000US51139	51139	Page County, Virginia	9623	272	9623	(X)	6908	282	71.8	2.6	2614	242	27.2	2.3	5112	265	53.1	2.7	1635	205	17	2	563	191	5.9	2	388	172	4	1.8	1233	216	12.8	2.2	591	173	6.1	1.8	2715	278	28.2	2.6	2191	245	22.8	2.3	1052	172	10.9
0500000US51141	51141	Patrick County, Virginia	7846	327	7846	(X)	5185	367	66.1	3.9	1709	226	21.8	2.7	4121	338	52.5	4	1094	187	13.9	2.3	179	92	2.3	1.2	71	55	0.9	0.7	885	188	11.3	2.3	544	156	6.9	2	2661	327	33.9	3.9	2362	323	30.1	3.9	1211	203	15.4
0500000US51143	51143	Pittsylvania County, Virginia	26092	512	26092	(X)	18364	532	70.4	1.7	6358	427	24.4	1.5	13862	473	53.1	1.8	4359	356	16.7	1.3	1260	233	4.8	0.9	463	142	1.8	0.5	3242	340	12.4	1.2	1536	260	5.9	1	7728	494	29.6	1.7	6876	451	26.4	1.6	2927	232	11.2
0500000US51145	51145	Powhatan County, Virginia	9544	261	9544	(X)	7532	340	78.9	2.5	2869	231	30.1	2.2	6273	333	65.7	2.7	2387	213	25	2	424	134	4.4	1.4	176	97	1.8	1	835	170	8.7	1.8	306	121	3.2	1.3	2012	238	21.1	2.5	1731	225	18.1	2.4	631	133	6.6
0500000US51147	51147	Prince Edward County, Virginia	7453	365	7453	(X)	4913	368	65.9	4	1927	276	25.9	3.4	3481	361	46.7	4.6	1123	199	15.1	2.6	300	121	4	1.6	173	106	2.3	1.4	1132	250	15.2	3.2	631	240	8.5	3.1	2540	331	34.1	4	2119	289	28.4	3.9	814	156	10.9
0500000US51149	51149	Prince George County, Virginia	10848	328	10848	(X)	8955	353	82.5	2.3	4096	319	37.8	2.5	7177	363	66.2	2.9	3043	274	28.1	2.3	591	189	5.4	1.7	407	168	3.8	1.5	1187	229	10.9	2.1	646	161	6	1.5	1893	258	17.5	2.3	1738	245	16	2.2	639	116	5.9
0500000US51153	51153	Prince William County, Virginia	132442	803	132442	(X)	103008	978	77.8	0.7	56870	998	42.9	0.7	79859	1273	60.3	0.9	43732	977	33	0.7	7031	655	5.3	0.5	4035	467	3	0.4	16118	897	12.2	0.7	9103	696	6.9	0.5	29434	916	22.2	0.7	23233	845	17.5	0.6	5359	432	4
0500000US51155	51155	Pulaski County, Virginia	14875	354	14875	(X)	10148	433	68.2	2.4	3147	281	21.2	1.8	7561	365	50.8	2.1	2065	250	13.9	1.6	706	216	4.7	1.4	326	155	2.2	1	1881	255	12.6	1.7	756	165	5.1	1.1	4727	373	31.8	2.4	4148	367	27.9	2.4	1522	224	10.2
0500000US51157	51157	Rappahannock County, Virginia	3261	151	3261	(X)	2126	180	65.2	4.8	711	132	21.8	3.6	1844	155	56.5	4.7	577	121	17.7	3.5	154	81	4.7	2.4	91	64	2.8	1.9	128	69	3.9	2.1	43	45	1.3	1.4	1135	170	34.8	4.8	951	154	29.2	4.4	421	97	12.9
0500000US51159	51159	Richmond County, Virginia	2853	303	2853	(X)	1878	239	65.8	5.1	646	150	22.6	4.6	1360	209	47.7	5.4	392	121	13.7	3.9	127	70	4.5	2.5	31	33	1.1	1.2	391	113	13.7	3.7	223	85	7.8	2.8	975	185	34.2	5.1	820	161	28.7	4.4	513	94	18
0500000US51161	51161	Roanoke County, Virginia	37928	434	37928	(X)	25859	638	68.2	1.7	10478	481	27.6	1.3	20683	643	54.5	1.8	7783	499	20.5	1.3	1477	287	3.9	0.7	838	224	2.2	0.6	3699	420	9.8	1.1	1857	295	4.9	0.8	12069	691	31.8	1.7	10592	639	27.9	1.6	4351	383	11.5
0500000US51163	51163	Rockbridge County, Virginia	9234	305	9234	(X)	6291	296	68.1	2.9	1845	190	20	1.9	5166	284	55.9	3	1421	195	15.4	2.1	417	122	4.5	1.3	191	90	2.1	1	708	187	7.7	2	233	103	2.5	1.1	2943	304	31.9	2.9	2564	289	27.8	2.8	1269	192	13.7
0500000US51165	51165	Rockingham County, Virginia	29440	411	29440	(X)	21052	496	71.5	1.5	8078	306	27.4	1	17100	506	58.1	1.6	6158	293	20.9	1	1018	147	3.5	0.5	429	105	1.5	0.4	2934	324	10	1.1	1491	241	5.1	0.8	8388	453	28.5	1.5	6969	471	23.7	1.6	3140	274	10.7
0500000US51167	51167	Russell County, Virginia	11191	314	11191	(X)	7684	350	68.7	2.8	2496	258	22.3	2.3	5984	358	53.5	3	1837	213	16.4	1.9	569	167	5.1	1.5	211	107	1.9	0.9	1131	205	10.1	1.8	448	170	4	1.5	3507	337	31.3	2.8	3118	298	27.9	2.5	1545	225	13.8
0500000US51169	51169	Scott County, Virginia	9692	286	9692	(X)	6876	274	70.9	2.4	2269	213	23.4	2	5481	290	56.6	2.8	1747	205	18	1.9	406	119	4.2	1.2	129	66	1.3	0.7	989	168	10.2	1.7	393	118	4.1	1.2	2816	260	29.1	2.4	2598	262	26.8	2.4	1382	187	14.3
0500000US51171	51171	Shenandoah County, Virginia	17397	386	17397	(X)	12209	442	70.2	2.2	4679	282	26.9	1.5	9463	407	54.4	2.4	3154	252	18.1	1.5	1080	237	6.2	1.3	502	176	2.9	1	1666	262	9.6	1.4	1023	211	5.9	1.2	5188	410	29.8	2.2	4400	372	25.3	2	1977	258	11.4
0500000US51173	51173	Smyth County, Virginia	12650	404	12650	(X)	8664	389	68.5	2.1	2990	274	23.6	1.9	6450	315	51	2.3	1959	223	15.5	1.7	699	144	5.5	1.1	260	97	2.1	0.8	1515	216	12	1.6	771	173	6.1	1.3	3986	298	31.5	2.1	3469	308	27.4	2.3	1561	185	12.3
0500000US51175	51175	Southampton County, Virginia	6708	205	6708	(X)	4770	223	71.1	2.9	1820	171	27.1	2.5	3460	233	51.6	3.2	1140	130	17	1.9	219	82	3.3	1.2	117	69	1.7	1	1091	156	16.3	2.3	563	136	8.4	2.1	1938	211	28.9	2.9	1663	206	24.8	2.9	679	113	10.1
0500000US51177	51177	Spotsylvania County, Virginia	41709	543	41709	(X)	32962	602	79	1.4	15877	612	38.1	1.5	25640	817	61.5	1.9	11571	621	27.7	1.5	1874	339	4.5	0.8	1108	272	2.7	0.7	5448	518	13.1	1.2	3198	414	7.7	1	8747	630	21	1.4	7074	556	17	1.3	2701	271	6.5
0500000US51179	51179	Stafford County, Virginia	42178	415	42178	(X)	34311	562	81.3	1	17353	568	41.1	1.2	27934	656	66.2	1.5	13617	493	32.3	1.1	1795	287	4.3	0.7	983	211	2.3	0.5	4582	464	10.9	1.1	2753	378	6.5	0.9	7867	433	18.7	1	6352	400	15.1	0.9	1863	221	4.4
0500000US51181	51181	Surry County, Virginia	2602	161	2602	(X)	1855	144	71.3	4.2	689	133	26.5	4.3	1318	128	50.7	4.9	415	108	15.9	3.9	181	72	7	2.7	121	65	4.7	2.4	356	90	13.7	3.2	153	63	5.9	2.3	747	125	28.7	4.2	660	120	25.4	4.2	291	86	11.2
0500000US51183	51183	Sussex County, Virginia	3704	307	3704	(X)	2296	247	62	4.1	738	145	19.9	3	1482	186	40	3.9	389	123	10.5	2.9	206	87	5.6	2.2	62	40	1.7	1	608	101	16.4	2.6	287	74	7.7	1.9	1408	190	38	4.1	1196	171	32.3	3.7	533	105	14.4
0500000US51185	51185	Tazewell County, Virginia	18294	316	18294	(X)	12739	418	69.6	2	4749	342	26	1.8	9974	470	54.5	2.4	3564	315	19.5	1.7	879	200	4.8	1.1	372	146	2	0.8	1886	284	10.3	1.5	813	216	4.4	1.2	5555	386	30.4	2	4878	363	26.7	1.9	2276	246	12.4
0500000US51187	51187	Warren County, Virginia	14387	283	14387	(X)	10147	412	70.5	2.7	4412	353	30.7	2.4	7663	382	53.3	2.7	3108	315	21.6	2.2	772	236	5.4	1.6	317	136	2.2	0.9	1712	292	11.9	2	987	252	6.9	1.7	4240	414	29.5	2.7	3366	394	23.4	2.6	1246	223	8.7
0500000US51191	51191	Washington County, Virginia	22755	379	22755	(X)	15546	428	68.3	1.8	5781	438	25.4	1.9	12084	463	53.1	2	4105	366	18	1.6	946	254	4.2	1.1	478	174	2.1	0.8	2516	335	11.1	1.5	1198	240	5.3	1	7209	444	31.7	1.8	6158	465	27.1	1.9	2637	271	11.6
0500000US51193	51193	Westmoreland County, Virginia	7130	334	7130	(X)	4440	293	62.3	3.8	1170	211	16.4	2.8	3169	232	44.4	3.4	694	161	9.7	2.2	422	154	5.9	2.1	209	117	2.9	1.6	849	190	11.9	2.7	267	121	3.7	1.7	2690	326	37.7	3.8	2321	327	32.6	3.9	978	170	13.7
0500000US51195	51195	Wise County, Virginia	15406	427	15406	(X)	10510	525	68.2	2.7	3826	315	24.8	1.8	7755	484	50.3	2.9	2537	281	16.5	1.7	678	168	4.4	1.1	241	108	1.6	0.7	2077	289	13.5	1.8	1048	218	6.8	1.4	4896	422	31.8	2.7	4263	402	27.7	2.6	1533	189	10
0500000US51197	51197	Wythe County, Virginia	11656	409	11656	(X)	7989	383	68.5	2.4	2789	303	23.9	2.3	6131	382	52.6	2.7	1840	270	15.8	2.1	573	160	4.9	1.4	262	122	2.2	1	1285	208	11	1.8	687	181	5.9	1.6	3667	317	31.5	2.4	3196	319	27.4	2.5	1524	211	13.1
0500000US51199	51199	York County, Virginia	24071	432	24071	(X)	19109	521	79.4	1.7	9016	408	37.5	1.6	15524	531	64.5	2	6966	425	28.9	1.7	715	180	3	0.7	339	134	1.4	0.5	2870	334	11.9	1.4	1711	273	7.1	1.1	4962	411	20.6	1.7	4216	380	17.5	1.6	1601	231	6.7
0500000US51510	51510	Alexandria city, Virginia	65369	920	65369	(X)	30863	930	47.2	1.2	12818	579	19.6	0.8	23334	772	35.7	1.2	8964	561	13.7	0.9	2335	337	3.6	0.5	1038	233	1.6	0.4	5194	536	7.9	0.8	2816	392	4.3	0.6	34506	866	52.8	1.2	28088	892	43	1.3	4959	361	7.6
0500000US51515	51515	Bedford city, Virginia	2800	244	2800	(X)	1690	158	60.4	6.5	662	149	23.6	4.8	1074	163	38.4	6.7	309	96	11	3.5	77	70	2.8	2.6	25	38	0.9	1.4	539	192	19.3	6.6	328	136	11.7	4.6	1110	247	39.6	6.5	1044	247	37.3	6.6	465	168	16.6
0500000US51520	51520	Bristol city, Virginia	7674	258	7674	(X)	4813	258	62.7	3.3	1967	223	25.6	2.8	3108	250	40.5	3.4	983	153	12.8	2	402	141	5.2	1.8	312	127	4.1	1.6	1303	215	17	2.8	672	169	8.8	2.2	2861	294	37.3	3.3	2519	272	32.8	3.1	1182	157	15.4
0500000US51530	51530	Buena Vista city, Virginia	2738	117	2738	(X)	1720	208	62.8	7.8	869	190	31.7	7.1	1146	178	41.9	6.3	494	134	18	4.9	216	129	7.9	4.7	177	117	6.5	4.2	358	141	13.1	5.3	198	122	7.2	4.5	1018	227	37.2	7.8	886	201	32.4	6.9	462	140	16.9
0500000US51540	51540	Charlottesville city, Virginia	17443	372	17443	(X)	7340	350	42.1	1.8	3285	260	18.8	1.4	5213	360	29.9	1.9	2123	213	12.2	1.1	490	147	2.8	0.8	208	107	1.2	0.6	1637	229	9.4	1.3	954	196	5.5	1.1	10103	380	57.9	1.8	6604	439	37.9	2.4	1582	186	9.1
0500000US51550	51550	Chesapeake city, Virginia	79421	735	79421	(X)	59469	930	74.9	1	27178	692	34.2	0.8	44451	992	56	1.2	19414	619	24.4	0.8	3377	499	4.3	0.6	1494	257	1.9	0.3	11641	716	14.7	0.9	6270	553	7.9	0.7	19952	815	25.1	1	16666	844	21	1	5584	444	7
0500000US51570	51570	Colonial Heights city, Virginia	7017	189	7017	(X)	4478	223	63.8	2.9	1741	200	24.8	2.6	3058	227	43.6	3.2	1049	161	14.9	2.2	429	134	6.1	1.9	228	97	3.2	1.4	991	188	14.1	2.6	464	131	6.6	1.8	2539	226	36.2	2.9	2091	211	29.8	2.8	1085	143	15.5
0500000US51580	51580	Covington city, Virginia	2545	141	2545	(X)	1361	143	53.5	5.3	555	104	21.8	4.1	901	130	35.4	5.3	293	90	11.5	3.4	88	56	3.5	2.2	39	37	1.5	1.4	372	106	14.6	4.1	223	93	8.8	3.8	1184	160	46.5	5.3	1069	158	42	5.3	513	89	20.2
0500000US51590	51590	Danville city, Virginia	18659	488	18659	(X)	11086	480	59.4	2	4055	357	21.7	1.8	6596	371	35.4	1.9	1788	242	9.6	1.3	825	191	4.4	1	318	127	1.7	0.7	3665	317	19.6	1.6	1949	283	10.4	1.5	7573	431	40.6	2	6857	447	36.7	2.2	2872	279	15.4
0500000US51595	51595	Emporia city, Virginia	2488	199	2488	(X)	1496	155	60.1	6.5	658	137	26.4	5.6	743	134	29.9	5.2	295	109	11.9	4.4	183	78	7.4	3.3	47	44	1.9	1.8	570	118	22.9	4.7	316	114	12.7	4.5	992	209	39.9	6.5	888	195	35.7	6.1	395	100	15.9
0500000US51600	51600	Fairfax city, Virginia	8492	134	8492	(X)	5768	263	67.9	2.8	2383	236	28.1	2.7	4645	260	54.7	2.9	1908	216	22.5	2.5	336	122	4	1.4	156	89	1.8	1	787	152	9.3	1.8	319	112	3.8	1.3	2724	239	32.1	2.8	1829	236	21.5	2.8	668	142	7.9
0500000US51610	51610	Falls Church city, Virginia	5020	157	5020	(X)	3092	229	61.6	4.3	1759	184	35	3.6	2504	222	49.9	4.4	1327	151	26.4	3.1	104	67	2.1	1.3	101	66	2	1.3	484	167	9.6	3.3	331	134	6.6	2.6	1928	229	38.4	4.3	1615	225	32.2	4.3	417	115	8.3
0500000US51620	51620	Franklin city, Virginia	3551	179	3551	(X)	2283	197	64.3	5.4	923	154	26	4.3	1343	200	37.8	5.6	520	151	14.6	4.2	64	47	1.8	1.3	0	17	0	1	876	154	24.7	4.4	403	97	11.3	2.7	1268	218	35.7	5.4	1144	222	32.2	5.7	454	100	12.8
0500000US51630	51630	Fredericksburg city, Virginia	9779	303	9779	(X)	5170	370	52.9	3.7	2623	300	26.8	3	3186	265	32.6	2.8	1419	221	14.5	2.3	357	147	3.7	1.5	135	87	1.4	0.9	1627	272	16.6	2.7	1069	237	10.9	2.4	4609	404	47.1	3.7	3715	390	38	3.8	993	179	10.2
0500000US51640	51640	Galax city, Virginia	3018	224	3018	(X)	1725	170	57.2	6.1	689	123	22.8	4.4	1171	191	38.8	5.8	349	121	11.6	4	90	61	3	2	51	49	1.7	1.6	464	161	15.4	5.7	289	127	9.6	4.4	1293	246	42.8	6.1	1170	247	38.8	6.2	469	149	15.5
0500000US51650	51650	Hampton city, Virginia	52511	729	52511	(X)	33370	697	63.5	1.3	14028	584	26.7	1.1	22286	776	42.4	1.5	7723	505	14.7	1	1979	320	3.8	0.6	852	220	1.6	0.4	9105	592	17.3	1.1	5453	517	10.4	1	19141	831	36.5	1.3	16108	768	30.7	1.3	5267	390	10
0500000US51660	51660	Harrisonburg city, Virginia	15701	450	15701	(X)	8135	396	51.8	2.4	3975	293	25.3	2	5709	416	36.4	2.6	2436	247	15.5	1.6	884	214	5.6	1.4	539	178	3.4	1.2	1542	265	9.8	1.7	1000	243	6.4	1.5	7566	481	48.2	2.4	3857	431	24.6	2.6	1161	177	7.4
0500000US51670	51670	Hopewell city, Virginia	8766	276	8766	(X)	5300	408	60.5	4.3	2192	361	25	3.8	2796	309	31.9	3.8	708	191	8.1	2.1	554	193	6.3	2.1	228	144	2.6	1.6	1950	275	22.2	2.9	1256	285	14.3	3.1	3466	399	39.5	4.3	3054	391	34.8	4.3	1115	185	12.7
0500000US51678	51678	Lexington city, Virginia	1709	851	1709	(X)	855	373	50	8.2	354	170	20.7	6.4	677	325	39.6	7.5	232	133	13.6	5.3	0	17	0	2	0	17	0	2	178	89	10.4	4.5	122	77	7.1	4.2	854	513	50	8.2	732	417	42.8	7.1	407	202	23.8
0500000US51680	51680	Lynchburg city, Virginia	28556	529	28556	(X)	16060	491	56.2	1.6	7186	473	25.2	1.6	11000	411	38.5	1.4	4455	376	15.6	1.3	1074	215	3.8	0.8	548	174	1.9	0.6	3986	328	14	1.1	2183	283	7.6	1	12496	571	43.8	1.6	10200	552	35.7	1.8	3563	287	12.5
0500000US51683	51683	Manassas city, Virginia	12072	267	12072	(X)	9054	342	75	3	4826	346	40	3.1	6473	384	53.6	3.3	3250	345	26.9	3	811	230	6.7	1.9	493	205	4.1	1.7	1770	290	14.7	2.5	1083	255	9	2.2	3018	397	25	3	2383	358	19.7	2.8	619	139	5.1
0500000US51685	51685	Manassas Park city, Virginia	4435	200	4435	(X)	3331	269	75.1	4.6	1724	227	38.9	4.5	2504	257	56.5	5.5	1275	207	28.7	4.6	160	81	3.6	1.8	88	63	2	1.4	667	192	15	4.1	361	149	8.1	3.3	1104	204	24.9	4.6	957	188	21.6	4.2	380	106	8.6
0500000US51690	51690	Martinsville city, Virginia	5995	252	5995	(X)	3408	216	56.8	3.1	1475	186	24.6	2.9	1930	193	32.2	3.2	672	105	11.2	1.8	252	99	4.2	1.6	109	58	1.8	1	1226	178	20.5	2.8	694	173	11.6	2.7	2587	231	43.2	3.1	2354	225	39.3	3.1	996	132	16.6
0500000US51700	51700	Newport News city, Virginia	69211	958	69211	(X)	43720	895	63.2	1.1	20513	728	29.6	1	27636	770	39.9	1	11234	561	16.2	0.8	3337	422	4.8	0.6	1809	339	2.6	0.5	12747	665	18.4	0.9	7470	515	10.8	0.7	25491	875	36.8	1.1	20995	792	30.3	1	6068	433	8.8
0500000US51710	51710	Norfolk city, Virginia	85557	1033	85557	(X)	49478	932	57.8	1	23447	670	27.4	0.7	29373	825	34.3	0.9	11995	536	14	0.6	4820	381	5.6	0.4	2438	282	2.8	0.3	15285	662	17.9	0.7	9014	549	10.5	0.6	36079	987	42.2	1	27852	859	32.6	0.9	7545	400	8.8
0500000US51720	51720	Norton city, Virginia	1706	166	1706	(X)	902	104	52.9	7.6	351	84	20.6	5.9	573	122	33.6	7.4	223	79	13.1	4.8	73	67	4.3	3.9	20	32	1.2	1.9	256	86	15	5.6	108	65	6.3	4.1	804	185	47.1	7.6	649	169	38	7.8	168	65	9.8
0500000US51730	51730	Petersburg city, Virginia	12456	410	12456	(X)	7283	385	58.5	2.5	2597	276	20.8	2	3499	283	28.1	2.2	740	185	5.9	1.4	495	138	4	1.1	165	90	1.3	0.7	3289	278	26.4	2.1	1692	232	13.6	1.8	5173	365	41.5	2.5	4317	315	34.7	2.3	1680	191	13.5
0500000US51735	51735	Poquoson city, Virginia	4591	78	4591	(X)	3421	156	74.5	3.5	1331	166	29	3.6	2802	177	61	3.9	988	137	21.5	3	225	79	4.9	1.7	81	45	1.8	1	394	131	8.6	2.9	262	110	5.7	2.4	1170	167	25.5	3.5	1040	164	22.7	3.5	450	108	9.8
0500000US51740	51740	Portsmouth city, Virginia	36690	610	36690	(X)	23689	655	64.6	1.5	9889	475	27	1.2	13428	548	36.6	1.4	4453	343	12.1	1	2148	357	5.9	1	1045	245	2.8	0.7	8113	460	22.1	1.2	4391	398	12	1	13001	618	35.4	1.5	10910	573	29.7	1.5	3796	318	10.3
0500000US51750	51750	Radford city, Virginia	5516	287	5516	(X)	2409	200	43.7	3.6	1152	164	20.9	3.2	1696	219	30.7	3.7	681	142	12.3	2.5	157	85	2.8	1.6	64	43	1.2	0.8	556	175	10.1	3.2	407	152	7.4	2.8	3107	293	56.3	3.6	1938	246	35.1	4.5	531	119	9.6
0500000US51760	51760	Richmond city, Virginia	84833	1004	84833	(X)	40329	952	47.5	1	18044	651	21.3	0.7	20579	681	24.3	0.7	7497	476	8.8	0.5	3832	441	4.5	0.5	1427	252	1.7	0.3	15918	637	18.8	0.7	9120	574	10.8	0.7	44504	964	52.5	1	34110	932	40.2	1.1	9029	435	10.6
0500000US51770	51770	Roanoke city, Virginia	42494	523	42494	(X)	23116	750	54.4	1.7	9373	542	22.1	1.2	13770	712	32.4	1.6	4568	490	10.7	1.2	1754	345	4.1	0.8	711	224	1.7	0.5	7592	497	17.9	1.2	4094	378	9.6	0.9	19378	780	45.6	1.7	16485	740	38.8	1.6	5488	382	12.9
0500000US51775	51775	Salem city, Virginia	9908	265	9908	(X)	6226	291	62.8	2.8	2578	242	26	2.4	4666	301	47.1	3	1748	175	17.6	1.8	409	139	4.1	1.4	219	123	2.2	1.2	1151	187	11.6	1.9	611	163	6.2	1.6	3682	320	37.2	2.8	2936	319	29.6	2.9	1093	180	11
0500000US51790	51790	Staunton city, Virginia	10495	254	10495	(X)	5939	298	56.6	2.7	2272	245	21.6	2.2	4136	267	39.4	2.5	1265	202	12.1	1.9	477	138	4.5	1.3	224	91	2.1	0.9	1326	196	12.6	1.9	783	172	7.5	1.6	4556	312	43.4	2.7	4049	326	38.6	2.8	1831	214	17.4
0500000US51800	51800	Suffolk city, Virginia	30492	408	30492	(X)	22396	529	73.4	1.5	10278	450	33.7	1.3	16028	538	52.6	1.7	6700	421	22	1.3	1340	234	4.4	0.8	707	195	2.3	0.6	5028	433	16.5	1.4	2871	365	9.4	1.2	8096	480	26.6	1.5	6899	457	22.6	1.4	2462	249	8.1
0500000US51810	51810	Virginia Beach city, Virginia	164944	1049	164944	(X)	112631	1275	68.3	0.7	52578	1118	31.9	0.7	83318	1237	50.5	0.7	35250	939	21.4	0.5	6201	539	3.8	0.3	3118	384	1.9	0.2	23112	854	14	0.5	14210	716	8.6	0.4	52313	1295	31.7	0.7	39979	1153	24.2	0.6	12665	576	7.7
0500000US51820	51820	Waynesboro city, Virginia	8708	270	8708	(X)	5370	306	61.7	3.3	2301	252	26.4	2.7	3690	294	42.4	3.4	1332	205	15.3	2.3	427	145	4.9	1.6	275	124	3.2	1.4	1253	205	14.4	2.4	694	165	8	1.9	3338	319	38.3	3.3	2801	298	32.2	3.2	1385	192	15.9
0500000US51830	51830	Williamsburg city, Virginia	4391	281	4391	(X)	2276	197	51.8	4.6	744	150	16.9	3.2	1709	190	38.9	4	436	124	9.9	2.6	158	73	3.6	1.6	76	52	1.7	1.2	409	113	9.3	2.7	232	86	5.3	2	2115	288	48.2	4.6	1684	218	38.4	4.3	607	127	13.8
0500000US51840	51840	Winchester city, Virginia	10393	330	10393	(X)	5666	339	54.5	3.3	2509	288	24.1	2.7	3768	278	36.3	2.8	1414	188	13.6	1.7	517	184	5	1.7	338	146	3.3	1.4	1381	230	13.3	2.3	757	171	7.3	1.7	4727	417	45.5	3.3	3683	374	35.4	3.2	1251	159	12
0500000US54001	54001	Barbour County, West Virginia	6099	236	6099	(X)	4299	243	70.5	3	1380	178	22.6	2.5	3456	235	56.7	3.4	946	146	15.5	2.3	236	82	3.9	1.3	148	73	2.4	1.2	607	127	10	2	286	104	4.7	1.7	1800	195	29.5	3	1625	198	26.6	3.1	763	139	12.5
0500000US54003	54003	Berkeley County, West Virginia	40447	570	40447	(X)	28434	787	70.3	1.8	12506	592	30.9	1.5	21052	807	52	2	8157	554	20.2	1.4	2311	398	5.7	1	1403	334	3.5	0.8	5071	529	12.5	1.3	2946	436	7.3	1.1	12013	757	29.7	1.8	10090	712	24.9	1.7	3070	351	7.6
0500000US54005	54005	Boone County, West Virginia	9559	248	9559	(X)	6864	302	71.8	2.7	2685	221	28.1	2.1	5361	319	56.1	3	2035	224	21.3	2.2	400	124	4.2	1.3	193	87	2	0.9	1103	183	11.5	1.9	457	131	4.8	1.4	2695	271	28.2	2.7	2397	271	25.1	2.7	1041	162	10.9
0500000US54007	54007	Braxton County, West Virginia	5780	219	5780	(X)	3845	194	66.5	3.2	966	133	16.7	2.2	3118	176	53.9	2.9	700	130	12.1	2.2	284	87	4.9	1.5	115	65	2	1.1	443	104	7.7	1.8	151	60	2.6	1	1935	219	33.5	3.2	1700	219	29.4	3.3	778	134	13.5
0500000US54009	54009	Brooke County, West Virginia	9968	217	9968	(X)	6521	264	65.4	2.6	2364	222	23.7	2.1	4810	234	48.3	2.4	1437	180	14.4	1.8	518	131	5.2	1.3	239	102	2.4	1	1193	232	12	2.3	688	185	6.9	1.8	3447	281	34.6	2.6	3055	286	30.6	2.7	1308	183	13.1
0500000US54011	54011	Cabell County, West Virginia	40144	564	40144	(X)	24174	638	60.2	1.4	9482	474	23.6	1.2	17088	606	42.6	1.5	5696	345	14.2	0.8	1692	275	4.2	0.7	776	197	1.9	0.5	5394	493	13.4	1.2	3010	387	7.5	1	15970	627	39.8	1.4	13206	615	32.9	1.5	4744	342	11.8
0500000US54013	54013	Calhoun County, West Virginia	3141	146	3141	(X)	2101	153	66.9	4.4	719	108	22.9	3.2	1608	182	51.2	5.4	453	111	14.4	3.4	178	74	5.7	2.4	66	51	2.1	1.6	315	104	10	3.3	200	85	6.4	2.7	1040	153	33.1	4.4	921	137	29.3	3.9	511	98	16.3
0500000US54015	54015	Clay County, West Virginia	3435	176	3435	(X)	2434	184	70.9	4.5	883	148	25.7	4	2084	199	60.7	5.4	708	148	20.6	4.1	84	48	2.4	1.4	34	33	1	0.9	266	99	7.7	2.9	141	66	4.1	1.9	1001	168	29.1	4.5	875	161	25.5	4.4	451	122	13.1
0500000US54017	54017	Doddridge County, West Virginia	2778	186	2778	(X)	1930	181	69.5	4.8	595	134	21.4	4.2	1465	187	52.7	5.9	400	116	14.4	3.9	148	56	5.3	1.9	57	48	2.1	1.7	317	97	11.4	3.4	138	67	5	2.4	848	146	30.5	4.8	740	142	26.6	4.7	386	93	13.9
0500000US54019	54019	Fayette County, West Virginia	17250	466	17250	(X)	11508	565	66.7	2.4	3958	378	22.9	2	8198	477	47.5	2.4	2492	285	14.4	1.6	866	193	5	1.1	344	121	2	0.7	2444	306	14.2	1.7	1122	252	6.5	1.4	5742	408	33.3	2.4	4941	401	28.6	2.4	2279	258	13.2
0500000US54021	54021	Gilmer County, West Virginia	2590	366	2590	(X)	1615	216	62.4	4.4	555	96	21.4	2.8	1304	214	50.3	4.6	397	86	15.3	2.7	106	55	4.1	2	45	43	1.7	1.6	205	58	7.9	2.7	113	50	4.4	2	975	205	37.6	4.4	766	180	29.6	5.1	346	98	13.4
0500000US54023	54023	Grant County, West Virginia	4449	214	4449	(X)	3022	196	67.9	3.4	1114	144	25	3	2500	189	56.2	3.7	815	135	18.3	2.9	174	78	3.9	1.7	126	70	2.8	1.6	348	88	7.8	1.9	173	76	3.9	1.7	1427	176	32.1	3.4	1189	172	26.7	3.5	663	137	14.9
0500000US54025	54025	Greenbrier County, West Virginia	15409	382	15409	(X)	10005	439	64.9	2.5	3645	284	23.7	1.8	7387	410	47.9	2.3	2440	241	15.8	1.5	757	185	4.9	1.2	275	129	1.8	0.8	1861	237	12.1	1.5	930	180	6	1.2	5404	408	35.1	2.5	4649	360	30.2	2.2	2176	205	14.1
0500000US54027	54027	Hampshire County, West Virginia	10570	363	10570	(X)	4657	362	44.1	3.2	1547	197	14.6	1.8	3548	298	33.6	2.9	975	168	9.2	1.6	268	112	2.5	1.1	77	57	0.7	0.5	841	221	8	2	495	143	4.7	1.3	5913	403	55.9	3.2	5636	401	53.3	3.2	1700	200	16.1
0500000US54029	54029	Hancock County, West Virginia	12890	321	12890	(X)	8542	325	66.3	2.1	3178	229	24.7	1.8	6272	329	48.7	2.5	2071	241	16.1	1.9	677	182	5.3	1.4	326	131	2.5	1	1593	252	12.4	1.9	781	181	6.1	1.4	4348	305	33.7	2.1	3861	318	30	2.3	1741	216	13.5
0500000US54031	54031	Hardy County, West Virginia	5020	257	5020	(X)	3094	231	61.6	4.1	915	128	18.2	2.4	2384	223	47.5	4.1	538	105	10.7	2	290	116	5.8	2.3	159	78	3.2	1.5	420	94	8.4	1.9	218	79	4.3	1.6	1926	246	38.4	4.1	1767	240	35.2	4.2	660	127	13.1
0500000US54033	54033	Harrison County, West Virginia	27599	389	27599	(X)	18520	481	67.1	1.5	7374	327	26.7	1.1	13963	504	50.6	1.6	5012	309	18.2	1	1042	174	3.8	0.6	577	145	2.1	0.5	3515	366	12.7	1.3	1785	248	6.5	0.9	9079	422	32.9	1.5	8030	423	29.1	1.5	3393	289	12.3
0500000US54035	54035	Jackson County, West Virginia	11459	321	11459	(X)	7810	377	68.2	2.7	2871	318	25.1	2.6	6132	399	53.5	3.4	1935	244	16.9	2.2	406	148	3.5	1.3	224	119	2	1	1272	287	11.1	2.4	712	227	6.2	1.9	3649	332	31.8	2.7	3128	324	27.3	2.7	1429	223	12.5
0500000US54037	54037	Jefferson County, West Virginia	19889	351	19889	(X)	14034	385	70.6	1.9	5789	336	29.1	1.6	11162	413	56.1	2.1	4206	331	21.1	1.6	843	196	4.2	1	436	142	2.2	0.7	2029	286	10.2	1.5	1147	232	5.8	1.2	5855	433	29.4	1.9	4507	427	22.7	2	1607	235	8.1
0500000US54039	54039	Kanawha County, West Virginia	82756	741	82756	(X)	50847	879	61.4	1	19403	714	23.4	0.8	36937	912	44.6	1.1	12215	644	14.8	0.8	3664	476	4.4	0.6	1968	354	2.4	0.4	10246	663	12.4	0.8	5220	452	6.3	0.5	31909	960	38.6	1	27479	843	33.2	0.9	10570	563	12.8
0500000US54041	54041	Lewis County, West Virginia	6451	231	6451	(X)	4342	258	67.3	3.2	1531	211	23.7	2.9	3340	227	51.8	3.3	956	149	14.8	2.2	323	102	5	1.6	136	84	2.1	1.3	679	135	10.5	2	439	121	6.8	1.8	2109	217	32.7	3.2	1807	211	28	3	808	134	12.5
0500000US54043	54043	Lincoln County, West Virginia	8416	240	8416	(X)	6112	348	72.6	3.7	2486	260	29.5	3	4554	378	54.1	4.4	1628	267	19.3	3.2	465	188	5.5	2.2	286	169	3.4	2	1093	204	13	2.4	572	130	6.8	1.5	2304	326	27.4	3.7	2125	312	25.2	3.6	1006	196	12
0500000US54045	54045	Logan County, West Virginia	14699	289	14699	(X)	10392	475	70.7	2.7	3578	328	24.3	2.1	7571	457	51.5	2.9	2567	312	17.5	2.1	856	211	5.8	1.4	327	130	2.2	0.9	1965	268	13.4	1.8	684	167	4.7	1.1	4307	400	29.3	2.7	3589	373	24.4	2.5	1582	259	10.8
0500000US54047	54047	McDowell County, West Virginia	8229	278	8229	(X)	5394	284	65.5	2.8	1715	184	20.8	2	3883	291	47.2	3.1	1061	167	12.9	2	429	120	5.2	1.5	138	63	1.7	0.8	1082	153	13.1	1.8	516	119	6.3	1.4	2835	257	34.5	2.8	2454	247	29.8	2.7	1052	156	12.8
0500000US54049	54049	Marion County, West Virginia	22593	336	22593	(X)	14742	489	65.3	1.9	5578	328	24.7	1.4	10994	482	48.7	2	3614	295	16	1.2	1007	181	4.5	0.8	538	161	2.4	0.7	2741	304	12.1	1.3	1426	217	6.3	1	7851	451	34.7	1.9	6532	447	28.9	2	3089	300	13.7
0500000US54051	54051	Marshall County, West Virginia	14042	249	14042	(X)	9395	391	66.9	2.7	3498	271	24.9	1.8	7380	331	52.6	2.5	2356	265	16.8	1.9	619	176	4.4	1.2	427	170	3	1.2	1396	283	9.9	2	715	158	5.1	1.1	4647	403	33.1	2.7	4058	378	28.9	2.6	1963	258	14
0500000US54053	54053	Mason County, West Virginia	10609	300	10609	(X)	7295	336	68.8	3.2	2625	258	24.7	2.3	5522	404	52.1	3.8	1774	279	16.7	2.6	391	140	3.7	1.3	200	110	1.9	1	1382	274	13	2.5	651	173	6.1	1.6	3314	375	31.2	3.2	2863	360	27	3.1	1316	203	12.4
0500000US54055	54055	Mercer County, West Virginia	25641	449	25641	(X)	16640	617	64.9	2.3	6228	368	24.3	1.5	12798	613	49.9	2.3	4246	331	16.6	1.3	971	169	3.8	0.7	460	129	1.8	0.5	2871	314	11.2	1.2	1522	274	5.9	1.1	9001	627	35.1	2.3	7919	581	30.9	2.1	3586	359	14
0500000US54057	54057	Mineral County, West Virginia	11180	300	11180	(X)	6251	351	55.9	2.9	2230	251	19.9	2.1	4801	309	42.9	2.7	1387	203	12.4	1.8	252	91	2.3	0.8	56	39	0.5	0.3	1198	236	10.7	2.1	787	212	7	1.9	4929	359	44.1	2.9	4675	356	41.8	2.9	1905	202	17
0500000US54059	54059	Mingo County, West Virginia	10827	296	10827	(X)	7592	314	70.1	2.5	2410	240	22.3	2.1	5627	331	52	2.9	1735	219	16	1.9	565	153	5.2	1.4	114	64	1.1	0.6	1400	190	12.9	1.7	561	137	5.2	1.3	3235	295	29.9	2.5	2890	287	26.7	2.4	1083	193	10
0500000US54061	54061	Monongalia County, West Virginia	36449	588	36449	(X)	19147	545	52.5	1.4	7982	429	21.9	1.1	14988	528	41.1	1.4	5695	376	15.6	1	1230	208	3.4	0.6	591	146	1.6	0.4	2929	302	8	0.8	1696	259	4.7	0.7	17302	625	47.5	1.4	13041	617	35.8	1.5	2545	243	7
0500000US54063	54063	Monroe County, West Virginia	5648	268	5648	(X)	4030	304	71.4	4.3	1222	183	21.6	2.9	3142	282	55.6	4.3	897	158	15.9	2.6	202	72	3.6	1.3	98	55	1.7	1	686	141	12.1	2.4	227	103	4	1.8	1618	254	28.6	4.3	1359	252	24.1	4.3	545	124	9.6
0500000US54065	54065	Morgan County, West Virginia	7343	310	7343	(X)	3872	310	52.7	4.1	1308	201	17.8	2.7	3114	293	42.4	4.2	985	182	13.4	2.5	255	106	3.5	1.4	68	58	0.9	0.8	503	143	6.9	1.9	255	120	3.5	1.6	3471	364	47.3	4.1	3164	355	43.1	4.1	1287	241	17.5
0500000US54067	54067	Nicholas County, West Virginia	10657	258	10657	(X)	7821	338	73.4	2.9	2503	243	23.5	2.1	6270	323	58.8	3.1	1973	236	18.5	2.1	584	183	5.5	1.7	188	102	1.8	0.9	967	179	9.1	1.7	342	113	3.2	1.1	2836	330	26.6	2.9	2506	301	23.5	2.7	1159	191	10.9
0500000US54069	54069	Ohio County, West Virginia	18553	365	18553	(X)	10837	405	58.4	1.8	3937	331	21.2	1.7	8228	346	44.3	1.8	2590	243	14	1.3	526	113	2.8	0.6	314	92	1.7	0.5	2083	275	11.2	1.4	1033	197	5.6	1	7716	371	41.6	1.8	6880	366	37.1	1.8	2718	224	14.6
0500000US54071	54071	Pendleton County, West Virginia	3274	169	3274	(X)	2091	184	63.9	4.7	611	97	18.7	2.8	1737	213	53.1	5.6	457	99	14	2.8	101	48	3.1	1.5	31	34	0.9	1	253	84	7.7	2.6	123	64	3.8	2	1183	167	36.1	4.7	1014	166	31	4.8	555	111	17
0500000US54073	54073	Pleasants County, West Virginia	2747	128	2747	(X)	1957	137	71.2	4.2	671	94	24.4	3.1	1663	125	60.5	4.3	498	68	18.1	2.4	92	62	3.3	2.2	71	60	2.6	2.1	202	62	7.4	2.3	102	37	3.7	1.3	790	125	28.8	4.2	680	123	24.8	4.3	332	72	12.1
0500000US54075	54075	Pocahontas County, West Virginia	3694	214	3694	(X)	2418	178	65.5	3.7	766	127	20.7	2.9	2047	169	55.4	3.7	554	107	15	2.5	138	55	3.7	1.5	73	55	2	1.5	233	67	6.3	1.8	139	57	3.8	1.5	1276	168	34.5	3.7	1100	155	29.8	3.7	536	113	14.5
0500000US54077	54077	Preston County, West Virginia	12697	271	12697	(X)	8831	289	69.6	1.9	3311	250	26.1	1.8	7268	290	57.2	2.1	2534	242	20	1.8	599	150	4.7	1.2	251	81	2	0.6	964	151	7.6	1.2	526	109	4.1	0.9	3866	259	30.4	1.9	3235	271	25.5	2	1421	151	11.2
0500000US54079	54079	Putnam County, West Virginia	21391	401	21391	(X)	16000	483	74.8	1.9	6741	410	31.5	1.8	12839	481	60	2.1	4985	342	23.3	1.6	904	207	4.2	1	403	143	1.9	0.7	2257	333	10.6	1.5	1353	286	6.3	1.3	5391	417	25.2	1.9	4471	424	20.9	1.9	1657	236	7.7
0500000US54081	54081	Raleigh County, West Virginia	31364	644	31364	(X)	20899	629	66.6	1.7	8046	525	25.7	1.5	15803	565	50.4	1.7	5308	442	16.9	1.3	1367	238	4.4	0.7	670	167	2.1	0.5	3729	387	11.9	1.2	2068	327	6.6	1	10465	594	33.4	1.7	9038	576	28.8	1.7	3911	387	12.5
0500000US54083	54083	Randolph County, West Virginia	11163	293	11163	(X)	7527	391	67.4	2.8	2580	245	23.1	2	5804	339	52	2.8	1760	217	15.8	1.8	569	144	5.1	1.3	236	97	2.1	0.9	1154	192	10.3	1.7	584	133	5.2	1.2	3636	309	32.6	2.8	3400	321	30.5	2.9	1360	192	12.2
0500000US54085	54085	Ritchie County, West Virginia	4032	190	4032	(X)	2600	172	64.5	3.5	869	109	21.6	2.4	2040	157	50.6	3.5	586	103	14.5	2.5	173	50	4.3	1.3	54	29	1.3	0.7	387	81	9.6	1.9	229	62	5.7	1.5	1432	164	35.5	3.5	1320	162	32.7	3.6	535	102	13.3
0500000US54087	54087	Roane County, West Virginia	5975	189	5975	(X)	3978	251	66.6	3.5	1364	196	22.8	3	3052	242	51.1	3.9	909	157	15.2	2.6	202	103	3.4	1.7	117	90	2	1.5	724	170	12.1	2.8	338	124	5.7	2	1997	219	33.4	3.5	1740	208	29.1	3.4	869	150	14.5
0500000US54089	54089	Summers County, West Virginia	5350	234	5350	(X)	3700	260	69.2	4	1107	186	20.7	3.1	2859	243	53.4	4.2	828	176	15.5	3.1	387	163	7.2	3	170	78	3.2	1.4	454	115	8.5	2.1	109	60	2	1.1	1650	228	30.8	4	1551	224	29	3.9	817	146	15.3
0500000US54091	54091	Taylor County, West Virginia	6878	167	6878	(X)	4873	249	70.8	3	1765	217	25.7	3	3671	247	53.4	3.3	1298	179	18.9	2.5	338	114	4.9	1.6	110	66	1.6	1	864	166	12.6	2.4	357	117	5.2	1.7	2005	212	29.2	3	1755	203	25.5	2.9	766	155	11.1
0500000US54093	54093	Tucker County, West Virginia	3050	154	3050	(X)	2087	153	68.4	3.5	721	100	23.6	2.9	1694	153	55.5	4.1	548	88	18	2.6	154	64	5	2.1	78	50	2.6	1.6	239	66	7.8	2.2	95	41	3.1	1.3	963	115	31.6	3.5	848	110	27.8	3.5	485	96	15.9
0500000US54095	54095	Tyler County, West Virginia	3712	182	3712	(X)	2587	174	69.7	3.2	841	117	22.7	2.7	2020	165	54.4	3.8	561	107	15.1	2.7	183	75	4.9	2	113	67	3	1.8	384	84	10.3	2.1	167	52	4.5	1.3	1125	130	30.3	3.2	1019	135	27.5	3.4	516	84	13.9
0500000US54097	54097	Upshur County, West Virginia	9011	292	9011	(X)	6130	319	68	3	2261	281	25.1	2.8	4929	306	54.7	3.1	1705	253	18.9	2.6	318	117	3.5	1.3	154	90	1.7	1	883	177	9.8	1.9	402	132	4.5	1.4	2881	297	32	3	2469	272	27.4	2.8	1110	161	12.3
0500000US54099	54099	Wayne County, West Virginia	16555	353	16555	(X)	10975	438	66.3	2.3	3976	322	24	1.9	8301	454	50.1	2.5	2747	254	16.6	1.5	690	151	4.2	0.9	318	139	1.9	0.8	1984	247	12	1.5	911	172	5.5	1	5580	415	33.7	2.3	4994	399	30.2	2.3	2219	242	13.4
0500000US54101	54101	Webster County, West Virginia	3928	205	3928	(X)	2759	227	70.2	4.7	1034	138	26.3	3	2098	201	53.4	4.7	682	134	17.4	3.2	252	90	6.4	2.2	87	47	2.2	1.2	409	102	10.4	2.6	265	77	6.7	2	1169	200	29.8	4.7	973	198	24.8	4.9	440	122	11.2
0500000US54103	54103	Wetzel County, West Virginia	6903	241	6903	(X)	4527	219	65.6	2.6	1568	196	22.7	2.6	3560	217	51.6	3	1080	148	15.6	2	202	72	2.9	1	113	59	1.6	0.9	765	149	11.1	2.1	375	107	5.4	1.5	2376	210	34.4	2.6	2102	220	30.5	2.8	1021	141	14.8
0500000US54105	54105	Wirt County, West Virginia	2427	145	2427	(X)	1591	146	65.6	4.8	509	123	21	4.7	1269	135	52.3	5.5	356	104	14.7	4.2	35	33	1.4	1.4	5	9	0.2	0.4	287	92	11.8	3.5	148	72	6.1	2.9	836	131	34.4	4.8	607	123	25	5	296	72	12.2
0500000US54107	54107	Wood County, West Virginia	35569	460	35569	(X)	23292	613	65.5	1.4	8873	413	24.9	1.1	18143	580	51	1.5	6110	415	17.2	1.2	1468	258	4.1	0.7	659	182	1.9	0.5	3681	356	10.3	1	2104	262	5.9	0.7	12277	529	34.5	1.4	10673	468	30	1.3	4590	282	12.9
0500000US54109	54109	Wyoming County, West Virginia	9101	256	9101	(X)	6427	276	70.6	2.3	2460	214	27	2.1	5076	340	55.8	3.3	1829	191	20.1	1.9	420	143	4.6	1.6	150	72	1.6	0.8	931	169	10.2	1.9	481	135	5.3	1.5	2674	224	29.4	2.3	2384	236	26.2	2.5	1129	170	12.4
[truncated: 561 more columns]
