# Supplementary material for: Evaluation of Policy Effectiveness by Mathematical Modeling for the Opioid Crisis with Spatial Study and Trend Analysis
Source: Healthcare (Basel). 2021 May 14;9(5):585. doi: 10.3390/healthcare9050585 (PMC8155830; doi:10.3390/healthcare9050585)
Supplement: Supplementary file 1 [file healthcare-09-00585-s001.zip › Table S6.xlsx]

## Sheet: Table S6
GEO.id	GEO.id2	GEO.display-label	HC01_VC03	HC02_VC03	HC03_VC03	HC04_VC03	HC01_VC04	HC02_VC04	HC03_VC04	HC04_VC04	HC01_VC05	HC02_VC05	HC03_VC05	HC04_VC05	HC01_VC06	HC02_VC06	HC03_VC06	HC04_VC06	HC01_VC07	HC02_VC07	HC03_VC07	HC04_VC07	HC01_VC08	HC02_VC08	HC03_VC08	HC04_VC08	HC01_VC09	HC02_VC09	HC03_VC09	HC04_VC09	HC01_VC10	HC02_VC10	HC03_VC10	HC04_VC10	HC01_VC11	HC02_VC11	HC03_VC11	HC04_VC11	HC01_VC12	HC02_VC12	HC03_VC12	HC04_VC12	HC01_VC13	HC02_VC13	HC03_VC13	HC04_VC13	HC01_VC14	HC02_VC14	HC03_VC14
Id	Id2	Geography	Estimate; HOUSEHOLDS BY TYPE - Total households	Margin of Error; HOUSEHOLDS BY TYPE - Total households	Percent; HOUSEHOLDS BY TYPE - Total households	Percent Margin of Error; HOUSEHOLDS BY TYPE - Total households	Estimate; HOUSEHOLDS BY TYPE - Total households - Family households (families)	Margin of Error; HOUSEHOLDS BY TYPE - Total households - Family households (families)	Percent; HOUSEHOLDS BY TYPE - Total households - Family households (families)	Percent Margin of Error; HOUSEHOLDS BY TYPE - Total households - Family households (families)	Estimate; HOUSEHOLDS BY TYPE - Total households - Family households (families) - With own children under 18 years	Margin of Error; HOUSEHOLDS BY TYPE - Total households - Family households (families) - With own children under 18 years	Percent; HOUSEHOLDS BY TYPE - Total households - Family households (families) - With own children under 18 years	Percent Margin of Error; HOUSEHOLDS BY TYPE - Total households - Family households (families) - With own children under 18 years	Estimate; HOUSEHOLDS BY TYPE - Total households - Family households (families) - Married-couple family	Margin of Error; HOUSEHOLDS BY TYPE - Total households - Family households (families) - Married-couple family	Percent; HOUSEHOLDS BY TYPE - Total households - Family households (families) - Married-couple family	Percent Margin of Error; HOUSEHOLDS BY TYPE - Total households - Family households (families) - Married-couple family	Estimate; HOUSEHOLDS BY TYPE - Total households - Family households (families) - Married-couple family - With own children under 18 years	Margin of Error; HOUSEHOLDS BY TYPE - Total households - Family households (families) - Married-couple family - With own children under 18 years	Percent; HOUSEHOLDS BY TYPE - Total households - Family households (families) - Married-couple family - With own children under 18 years	Percent Margin of Error; HOUSEHOLDS BY TYPE - Total households - Family households (families) - Married-couple family - With own children under 18 years	Estimate; HOUSEHOLDS BY TYPE - Total households - Family households (families) - Male householder, no wife present, family	Margin of Error; HOUSEHOLDS BY TYPE - Total households - Family households (families) - Male householder, no wife present, family	Percent; HOUSEHOLDS BY TYPE - Total households - Family households (families) - Male householder, no wife present, family	Percent Margin of Error; HOUSEHOLDS BY TYPE - Total households - Family households (families) - Male householder, no wife present, family	Estimate; HOUSEHOLDS BY TYPE - Total households - Family households (families) - Male householder, no wife present, family - With own children under 18 years	Margin of Error; HOUSEHOLDS BY TYPE - Total households - Family households (families) - Male householder, no wife present, family - With own children under 18 years	Percent; HOUSEHOLDS BY TYPE - Total households - Family households (families) - Male householder, no wife present, family - With own children under 18 years	Percent Margin of Error; HOUSEHOLDS BY TYPE - Total households - Family households (families) - Male householder, no wife present, family - With own children under 18 years	Estimate; HOUSEHOLDS BY TYPE - Total households - Family households (families) - Female householder, no husband present, family	Margin of Error; HOUSEHOLDS BY TYPE - Total households - Family households (families) - Female householder, no husband present, family	Percent; HOUSEHOLDS BY TYPE - Total households - Family households (families) - Female householder, no husband present, family	Percent Margin of Error; HOUSEHOLDS BY TYPE - Total households - Family households (families) - Female householder, no husband present, family	Estimate; HOUSEHOLDS BY TYPE - Total households - Family households (families) - Female householder, no husband present, family - With own children under 18 years	Margin of Error; HOUSEHOLDS BY TYPE - Total households - Family households (families) - Female householder, no husband present, family - With own children under 18 years	Percent; HOUSEHOLDS BY TYPE - Total households - Family households (families) - Female householder, no husband present, family - With own children under 18 years	Percent Margin of Error; HOUSEHOLDS BY TYPE - Total households - Family households (families) - Female householder, no husband present, family - With own children under 18 years	Estimate; HOUSEHOLDS BY TYPE - Total households - Nonfamily households	Margin of Error; HOUSEHOLDS BY TYPE - Total households - Nonfamily households	Percent; HOUSEHOLDS BY TYPE - Total households - Nonfamily households	Percent Margin of Error; HOUSEHOLDS BY TYPE - Total households - Nonfamily households	Estimate; HOUSEHOLDS BY TYPE - Total households - Nonfamily households - Householder living alone	Margin of Error; HOUSEHOLDS BY TYPE - Total households - Nonfamily households - Householder living alone	Percent; HOUSEHOLDS BY TYPE - Total households - Nonfamily households - Householder living alone	Percent Margin of Error; HOUSEHOLDS BY TYPE - Total households - Nonfamily households - Householder living alone	Estimate; HOUSEHOLDS BY TYPE - Total households - Nonfamily households - Householder living alone - 65 years and over	Margin of Error; HOUSEHOLDS BY TYPE - Total households - Nonfamily households - Householder living alone - 65 years and over	Percent; HOUSEHOLDS BY TYPE - Total households - Nonfamily households - Householder living alone - 65 years and over
0500000US21001	21001	Adair County, Kentucky	7124	257	7124	(X)	4871	258	68.4	3	1691	206	23.7	2.6	3926	260	55.1	3.3	1299	181	18.2	2.3	257	88	3.6	1.2	99	51	1.4	0.7	688	145	9.7	2	293	106	4.1	1.5	2253	237	31.6	3	2012	241	28.2	3.1	935	172	13.1
0500000US21003	21003	Allen County, Kentucky	8057	223	8057	(X)	5593	261	69.4	3	2412	180	29.9	2.3	4463	227	55.4	2.8	1763	169	21.9	2.2	336	88	4.2	1.1	162	81	2	1	794	167	9.9	2	487	148	6	1.8	2464	262	30.6	3	2108	243	26.2	2.8	936	152	11.6
0500000US21005	21005	Anderson County, Kentucky	8353	261	8353	(X)	6008	260	71.9	3.1	2674	216	32	2.6	4757	266	56.9	3.4	1950	207	23.3	2.5	327	120	3.9	1.4	214	96	2.6	1.2	924	185	11.1	2.2	510	140	6.1	1.7	2345	296	28.1	3.1	1873	248	22.4	2.8	855	169	10.2
0500000US21007	21007	Ballard County, Kentucky	3279	126	3279	(X)	2174	126	66.3	3.5	753	89	23	2.5	1826	142	55.7	4.1	582	94	17.7	2.7	80	31	2.4	0.9	19	17	0.6	0.5	268	65	8.2	2	152	50	4.6	1.5	1105	130	33.7	3.5	942	126	28.7	3.4	458	93	14
0500000US21009	21009	Barren County, Kentucky	16789	310	16789	(X)	11589	376	69	2	4939	319	29.4	1.8	8914	424	53.1	2.4	3373	286	20.1	1.6	665	178	4	1.1	315	139	1.9	0.8	2010	283	12	1.7	1251	201	7.5	1.2	5200	361	31	2	4813	339	28.7	1.9	2302	229	13.7
0500000US21011	21011	Bath County, Kentucky	4361	232	4361	(X)	3017	223	69.2	4.3	1251	158	28.7	3	2267	179	52	4.3	828	119	19	2.6	190	88	4.4	2	137	75	3.1	1.7	560	145	12.8	3.1	286	77	6.6	1.6	1344	214	30.8	4.3	1076	177	24.7	3.7	473	107	10.8
0500000US21013	21013	Bell County, Kentucky	11181	320	11181	(X)	7403	345	66.2	2.6	2901	270	25.9	2.1	5021	311	44.9	2.4	1823	211	16.3	1.7	606	151	5.4	1.4	231	100	2.1	0.9	1776	258	15.9	2.3	847	162	7.6	1.4	3778	320	33.8	2.6	3318	303	29.7	2.6	1572	193	14.1
0500000US21015	21015	Boone County, Kentucky	43903	570	43903	(X)	32595	777	74.2	1.4	16134	533	36.7	1.1	25550	724	58.2	1.5	12224	525	27.8	1.1	2166	373	4.9	0.9	1287	280	2.9	0.6	4879	514	11.1	1.1	2623	416	6	0.9	11308	638	25.8	1.4	9320	626	21.2	1.4	3105	313	7.1
0500000US21017	21017	Bourbon County, Kentucky	7782	210	7782	(X)	5304	275	68.2	3.3	2235	193	28.7	2.5	3852	299	49.5	3.9	1475	214	19	2.8	311	103	4	1.3	90	45	1.2	0.6	1141	178	14.7	2.2	670	147	8.6	1.9	2478	270	31.8	3.3	2062	260	26.5	3.2	883	166	11.3
0500000US21019	21019	Boyd County, Kentucky	19533	366	19533	(X)	13291	422	68	1.9	5121	335	26.2	1.6	9961	438	51	2.1	3395	271	17.4	1.3	1102	230	5.6	1.2	515	167	2.6	0.9	2228	302	11.4	1.5	1211	223	6.2	1.1	6242	415	32	1.9	5469	387	28	1.8	2438	208	12.5
0500000US21021	21021	Boyle County, Kentucky	10981	296	10981	(X)	7441	363	67.8	2.7	2941	244	26.8	2	5532	312	50.4	2.7	1798	191	16.4	1.7	468	126	4.3	1.1	244	85	2.2	0.8	1441	200	13.1	1.7	899	193	8.2	1.7	3540	309	32.2	2.7	3092	286	28.2	2.4	1191	162	10.8
0500000US21023	21023	Bracken County, Kentucky	3303	120	3303	(X)	2208	115	66.8	3.6	905	102	27.4	3.1	1753	132	53.1	4.1	671	102	20.3	3.1	120	51	3.6	1.5	52	36	1.6	1.1	335	81	10.1	2.5	182	56	5.5	1.7	1095	139	33.2	3.6	931	133	28.2	3.6	476	85	14.4
0500000US21025	21025	Breathitt County, Kentucky	5434	183	5434	(X)	3647	187	67.1	3.4	1361	126	25	2.1	2468	178	45.4	3.3	882	103	16.2	1.9	307	78	5.6	1.4	87	51	1.6	0.9	872	132	16	2.4	392	79	7.2	1.4	1787	211	32.9	3.4	1625	198	29.9	3.2	642	103	11.8
0500000US21027	21027	Breckinridge County, Kentucky	7325	276	7325	(X)	5217	260	71.2	2.7	1760	164	24	1.8	4174	250	57	2.9	1303	148	17.8	1.7	335	109	4.6	1.5	181	71	2.5	1	708	156	9.7	2.1	276	99	3.8	1.3	2108	225	28.8	2.7	1799	195	24.6	2.4	789	124	10.8
0500000US21029	21029	Bullitt County, Kentucky	28282	335	28282	(X)	21160	466	74.8	1.5	8835	391	31.2	1.3	15962	471	56.4	1.6	5802	343	20.5	1.2	1504	270	5.3	1	821	209	2.9	0.7	3694	341	13.1	1.2	2212	291	7.8	1	7122	457	25.2	1.5	5730	451	20.3	1.6	2321	285	8.2
0500000US21031	21031	Butler County, Kentucky	5107	174	5107	(X)	3447	251	67.5	4.3	1464	168	28.7	3.2	2578	208	50.5	3.8	910	136	17.8	2.6	259	124	5.1	2.4	122	67	2.4	1.3	610	132	11.9	2.5	432	109	8.5	2.1	1660	227	32.5	4.3	1528	228	29.9	4.3	596	118	11.7
0500000US21033	21033	Caldwell County, Kentucky	5320	252	5320	(X)	3604	271	67.7	4.4	1245	248	23.4	4.4	2590	245	48.7	4.5	749	185	14.1	3.3	231	134	4.3	2.5	74	69	1.4	1.3	783	193	14.7	3.5	422	154	7.9	2.9	1716	258	32.3	4.4	1541	263	29	4.6	725	154	13.6
0500000US21035	21035	Calloway County, Kentucky	14854	446	14854	(X)	8715	382	58.7	2.3	3444	238	23.2	1.6	6947	344	46.8	2.2	2528	247	17	1.6	550	181	3.7	1.2	360	167	2.4	1.1	1218	216	8.2	1.4	556	173	3.7	1.2	6139	420	41.3	2.3	4989	414	33.6	2.5	1754	262	11.8
0500000US21037	21037	Campbell County, Kentucky	35478	501	35478	(X)	22573	570	63.6	1.7	9466	420	26.7	1.2	16714	563	47.1	1.7	6487	433	18.3	1.2	1556	262	4.4	0.7	644	169	1.8	0.5	4303	323	12.1	0.9	2335	273	6.6	0.8	12905	686	36.4	1.7	10605	622	29.9	1.6	3513	301	9.9
0500000US21039	21039	Carlisle County, Kentucky	2075	93	2075	(X)	1474	102	71	3.9	565	82	27.2	3.7	1130	95	54.5	4.3	381	68	18.4	3.3	123	45	5.9	2.2	40	25	1.9	1.2	221	59	10.7	2.7	144	59	6.9	2.8	601	87	29	3.9	562	86	27.1	3.9	305	65	14.7
0500000US21041	21041	Carroll County, Kentucky	4108	171	4108	(X)	2745	218	66.8	4.4	1291	163	31.4	3.5	1836	175	44.7	4.2	699	127	17	3.1	433	139	10.5	3.3	267	113	6.5	2.7	476	122	11.6	2.9	325	113	7.9	2.7	1363	189	33.2	4.4	1180	186	28.7	4.4	376	94	9.2
0500000US21043	21043	Carter County, Kentucky	10525	305	10525	(X)	7330	358	69.6	2.6	2552	255	24.2	2.1	5870	339	55.8	2.7	1928	237	18.3	2	383	130	3.6	1.2	137	62	1.3	0.6	1077	217	10.2	2.1	487	152	4.6	1.4	3195	282	30.4	2.6	2745	272	26.1	2.5	1352	178	12.8
0500000US21045	21045	Casey County, Kentucky	6186	211	6186	(X)	4213	270	68.1	3.8	1622	184	26.2	2.8	3492	279	56.5	4.3	1255	173	20.3	2.7	268	109	4.3	1.7	130	73	2.1	1.2	453	146	7.3	2.3	237	120	3.8	1.9	1973	246	31.9	3.8	1798	216	29.1	3.4	861	144	13.9
0500000US21047	21047	Christian County, Kentucky	25734	484	25734	(X)	18147	610	70.5	1.9	9713	485	37.7	1.6	13221	599	51.4	2	6852	460	26.6	1.6	1076	235	4.2	0.9	506	155	2	0.6	3850	343	15	1.3	2355	282	9.2	1.1	7587	500	29.5	1.9	6603	494	25.7	1.9	2432	219	9.5
0500000US21049	21049	Clark County, Kentucky	14368	269	14368	(X)	9874	343	68.7	2.3	3790	253	26.4	1.7	7487	409	52.1	2.8	2515	242	17.5	1.6	730	198	5.1	1.4	267	116	1.9	0.8	1657	215	11.5	1.5	1008	200	7	1.4	4494	356	31.3	2.3	3648	320	25.4	2.1	1512	187	10.5
0500000US21051	21051	Clay County, Kentucky	7652	242	7652	(X)	5280	285	69	3.1	1962	234	25.6	2.8	3709	254	48.5	3.1	1342	189	17.5	2.3	419	134	5.5	1.7	113	73	1.5	1	1152	178	15.1	2.3	507	139	6.6	1.8	2372	253	31	3.1	2169	237	28.3	2.9	815	128	10.7
0500000US21053	21053	Clinton County, Kentucky	3878	214	3878	(X)	2562	195	66.1	4.2	1002	172	25.8	3.9	1863	192	48	4.8	586	132	15.1	3.1	320	98	8.3	2.5	183	82	4.7	2.1	379	114	9.8	2.8	233	97	6	2.4	1316	190	33.9	4.2	1260	189	32.5	4.2	602	129	15.5
0500000US21055	21055	Crittenden County, Kentucky	3812	146	3812	(X)	2482	129	65.1	3.1	897	110	23.5	2.7	2121	134	55.6	3.5	762	108	20	2.7	101	54	2.6	1.4	18	19	0.5	0.5	260	77	6.8	1.9	117	55	3.1	1.4	1330	143	34.9	3.1	1206	139	31.6	3.1	571	102	15
0500000US21057	21057	Cumberland County, Kentucky	2684	186	2684	(X)	1810	154	67.4	4.3	584	110	21.8	3.7	1297	133	48.3	4.7	335	95	12.5	3.3	200	81	7.5	2.8	47	41	1.8	1.5	313	99	11.7	3.6	202	81	7.5	3	874	139	32.6	4.3	821	138	30.6	4.2	340	85	12.7
0500000US21059	21059	Daviess County, Kentucky	38000	464	38000	(X)	25671	527	67.6	1.3	10798	443	28.4	1.1	19556	462	51.5	1.3	7186	380	18.9	1	1573	274	4.1	0.7	839	206	2.2	0.5	4542	361	12	0.9	2773	350	7.3	0.9	12329	535	32.4	1.3	10609	486	27.9	1.2	4404	335	11.6
0500000US21061	21061	Edmonson County, Kentucky	4734	239	4734	(X)	3476	237	73.4	3.8	1340	183	28.3	3.3	2933	228	62	4.1	1107	158	23.4	3.1	128	81	2.7	1.7	42	53	0.9	1.1	415	124	8.8	2.5	191	77	4	1.6	1258	199	26.6	3.8	1096	180	23.2	3.5	470	100	9.9
0500000US21063	21063	Elliott County, Kentucky	2790	208	2790	(X)	1952	209	70	5.3	838	162	30	4.6	1348	176	48.3	5.2	516	133	18.5	4.1	228	104	8.2	3.6	105	79	3.8	2.8	376	95	13.5	3.4	217	76	7.8	2.7	838	156	30	5.3	709	148	25.4	5.1	411	123	14.7
0500000US21065	21065	Estill County, Kentucky	5706	203	5706	(X)	4029	226	70.6	3.2	1533	181	26.9	2.8	2987	277	52.3	4.4	963	174	16.9	2.9	160	66	2.8	1.2	59	42	1	0.7	882	213	15.5	3.7	511	160	9	2.8	1677	197	29.4	3.2	1462	187	25.6	3.1	717	137	12.6
0500000US21067	21067	Fayette County, Kentucky	124101	1071	124101	(X)	71151	1248	57.3	0.8	33078	932	26.7	0.7	50544	1067	40.7	0.8	21208	783	17.1	0.6	5234	457	4.2	0.4	2750	405	2.2	0.3	15373	811	12.4	0.6	9120	665	7.3	0.5	52950	1126	42.7	0.8	40504	993	32.6	0.8	10325	528	8.3
0500000US21069	21069	Fleming County, Kentucky	5542	201	5542	(X)	3976	190	71.7	3.6	1651	168	29.8	3.1	3058	186	55.2	3.4	1178	164	21.3	2.9	241	79	4.3	1.4	99	63	1.8	1.1	677	139	12.2	2.5	374	139	6.7	2.5	1566	229	28.3	3.6	1412	220	25.5	3.5	594	127	10.7
0500000US21071	21071	Floyd County, Kentucky	15438	385	15438	(X)	10725	459	69.5	2.2	4013	363	26	2.2	7685	454	49.8	2.5	2586	264	16.8	1.7	983	207	6.4	1.4	403	166	2.6	1.1	2057	285	13.3	1.8	1024	223	6.6	1.4	4713	345	30.5	2.2	4125	312	26.7	2	1504	219	9.7
0500000US21073	21073	Franklin County, Kentucky	21065	423	21065	(X)	12921	514	61.3	2.1	5419	421	25.7	1.7	9078	423	43.1	1.9	3159	360	15	1.6	1106	241	5.3	1.1	658	211	3.1	1	2737	342	13	1.6	1602	284	7.6	1.3	8144	461	38.7	2.1	6901	411	32.8	1.9	2072	269	9.8
0500000US21075	21075	Fulton County, Kentucky	2662	145	2662	(X)	1751	136	65.8	4.6	711	107	26.7	3.6	1299	129	48.8	4.7	446	89	16.8	3.1	112	46	4.2	1.7	62	39	2.3	1.5	340	77	12.8	2.8	203	65	7.6	2.4	911	144	34.2	4.6	851	145	32	4.7	296	68	11.1
0500000US21077	21077	Gallatin County, Kentucky	3024	165	3024	(X)	2021	175	66.8	5	776	104	25.7	3.3	1453	177	48	5.5	539	93	17.8	3.1	189	77	6.3	2.5	107	69	3.5	2.3	379	106	12.5	3.4	130	58	4.3	1.9	1003	169	33.2	5	835	147	27.6	4.5	230	60	7.6
0500000US21079	21079	Garrard County, Kentucky	6567	220	6567	(X)	4945	235	75.3	3	1854	164	28.2	2.3	3868	237	58.9	2.9	1298	149	19.8	2.1	265	110	4	1.7	122	70	1.9	1.1	812	153	12.4	2.4	434	127	6.6	1.9	1622	210	24.7	3	1481	195	22.6	2.7	593	129	9
0500000US21081	21081	Grant County, Kentucky	8301	278	8301	(X)	6296	373	75.8	3.2	2807	295	33.8	2.9	4891	350	58.9	3.9	1950	249	23.5	2.8	407	145	4.9	1.7	249	121	3	1.4	998	234	12	2.7	608	183	7.3	2.1	2005	261	24.2	3.2	1549	206	18.7	2.5	546	131	6.6
0500000US21083	21083	Graves County, Kentucky	14284	391	14284	(X)	9905	443	69.3	2.5	4169	250	29.2	1.5	7865	404	55.1	2.8	2947	227	20.6	1.6	518	150	3.6	1	315	119	2.2	0.8	1522	289	10.7	1.9	907	191	6.3	1.3	4379	383	30.7	2.5	4057	376	28.4	2.5	1830	228	12.8
0500000US21085	21085	Grayson County, Kentucky	9839	257	9839	(X)	6860	321	69.7	3.1	2762	265	28.1	2.5	5629	331	57.2	3.2	2214	251	22.5	2.5	431	135	4.4	1.4	160	68	1.6	0.7	800	182	8.1	1.8	388	155	3.9	1.6	2979	329	30.3	3.1	2638	331	26.8	3.1	1194	198	12.1
0500000US21087	21087	Green County, Kentucky	4474	154	4474	(X)	3129	183	69.9	3.6	1277	110	28.5	2.2	2488	164	55.6	3.6	957	111	21.4	2.5	150	65	3.4	1.5	63	43	1.4	0.9	491	103	11	2.2	257	82	5.7	1.8	1345	171	30.1	3.6	1200	156	26.8	3.3	685	123	15.3
0500000US21089	21089	Greenup County, Kentucky	14230	296	14230	(X)	10236	367	71.9	2.3	3916	292	27.5	1.9	7951	359	55.9	2.4	2792	255	19.6	1.8	638	127	4.5	0.9	299	86	2.1	0.6	1647	219	11.6	1.5	825	163	5.8	1.1	3994	344	28.1	2.3	3608	322	25.4	2.1	1709	180	12
0500000US21091	21091	Hancock County, Kentucky	3367	100	3367	(X)	2552	139	75.8	3.3	1041	103	30.9	2.9	1918	140	57	3.9	667	101	19.8	3	136	49	4	1.4	75	42	2.2	1.2	498	102	14.8	2.9	299	70	8.9	2	815	112	24.2	3.3	735	113	21.8	3.3	218	54	6.5
0500000US21093	21093	Hardin County, Kentucky	39955	522	39955	(X)	28084	601	70.3	1.4	13215	531	33.1	1.2	21043	688	52.7	1.8	8864	479	22.2	1.2	1650	296	4.1	0.7	932	246	2.3	0.6	5391	512	13.5	1.2	3419	424	8.6	1	11871	610	29.7	1.4	10158	592	25.4	1.4	3237	320	8.1
0500000US21095	21095	Harlan County, Kentucky	11251	256	11251	(X)	7865	295	69.9	2.3	3006	223	26.7	1.8	5395	291	48	2.4	2051	219	18.2	1.9	712	144	6.3	1.3	191	83	1.7	0.7	1758	207	15.6	1.8	764	142	6.8	1.2	3386	283	30.1	2.3	3057	267	27.2	2.2	1391	164	12.4
0500000US21097	21097	Harrison County, Kentucky	7257	228	7257	(X)	4619	287	63.6	3.7	1769	233	24.4	3	3456	272	47.6	3.7	1035	152	14.3	2.1	271	113	3.7	1.5	167	112	2.3	1.5	892	163	12.3	2.2	567	148	7.8	2	2638	289	36.4	3.7	2175	250	30	3.2	804	166	11.1
0500000US21099	21099	Hart County, Kentucky	7135	228	7135	(X)	5136	255	72	2.9	2076	196	29.1	2.4	3885	218	54.4	2.8	1351	154	18.9	2	335	101	4.7	1.4	218	92	3.1	1.3	916	121	12.8	1.6	507	102	7.1	1.4	1999	221	28	2.9	1720	201	24.1	2.7	684	120	9.6
0500000US21101	21101	Henderson County, Kentucky	18875	322	18875	(X)	12413	463	65.8	2	4996	340	26.5	1.7	9027	425	47.8	2.1	3102	270	16.4	1.4	958	263	5.1	1.4	476	165	2.5	0.9	2428	278	12.9	1.4	1418	258	7.5	1.4	6462	388	34.2	2	5832	391	30.9	2	2193	255	11.6
0500000US21103	21103	Henry County, Kentucky	5984	157	5984	(X)	4310	202	72	3.1	1689	144	28.2	2.4	3231	208	54	3.2	1078	137	18	2.3	275	88	4.6	1.5	145	56	2.4	0.9	804	128	13.4	2.2	466	102	7.8	1.7	1674	198	28	3.1	1396	188	23.3	3	648	102	10.8
0500000US21105	21105	Hickman County, Kentucky	1992	118	1992	(X)	1267	145	63.6	7.1	398	74	20	3.5	990	126	49.7	6.5	285	67	14.3	3.3	30	22	1.5	1.1	12	12	0.6	0.6	247	87	12.4	4.3	101	42	5.1	2.1	725	155	36.4	7.1	628	160	31.5	7.4	391	124	19.6
0500000US21107	21107	Hopkins County, Kentucky	18533	354	18533	(X)	12443	418	67.1	1.8	5169	332	27.9	1.6	9388	362	50.7	1.9	3395	300	18.3	1.6	653	161	3.5	0.9	328	110	1.8	0.6	2402	300	13	1.5	1446	248	7.8	1.3	6090	347	32.9	1.8	5420	332	29.2	1.8	2326	210	12.6
0500000US21109	21109	Jackson County, Kentucky	5670	194	5670	(X)	4216	272	74.4	4.2	1592	224	28.1	3.7	2936	283	51.8	4.7	949	183	16.7	3.1	386	146	6.8	2.5	210	98	3.7	1.7	894	184	15.8	3.3	433	141	7.6	2.5	1454	250	25.6	4.2	1310	230	23.1	3.9	414	129	7.3
0500000US21111	21111	Jefferson County, Kentucky	306511	1488	306511	(X)	185802	1774	60.6	0.5	80332	1427	26.2	0.4	126001	1546	41.1	0.5	47029	1287	15.3	0.4	14702	768	4.8	0.2	7114	565	2.3	0.2	45099	1115	14.7	0.4	26189	965	8.5	0.3	120709	1642	39.4	0.5	101137	1353	33	0.4	32341	1027	10.6
0500000US21113	21113	Jessamine County, Kentucky	18120	319	18120	(X)	13636	437	75.3	2	6297	393	34.8	1.9	10450	449	57.7	2.3	4439	378	24.5	2	763	206	4.2	1.1	456	149	2.5	0.8	2423	355	13.4	1.9	1402	273	7.7	1.5	4484	360	24.7	2	3613	340	19.9	1.8	1140	183	6.3
0500000US21115	21115	Johnson County, Kentucky	9134	266	9134	(X)	6643	331	72.7	3.1	2540	258	27.8	2.7	5227	307	57.2	2.8	1876	242	20.5	2.5	429	173	4.7	1.9	180	108	2	1.2	987	221	10.8	2.4	484	154	5.3	1.7	2491	294	27.3	3.1	2223	275	24.3	2.8	789	186	8.6
0500000US21117	21117	Kenton County, Kentucky	61962	639	61962	(X)	40005	832	64.6	1.1	18198	615	29.4	0.9	28480	785	46	1.2	11418	600	18.4	1	3251	363	5.2	0.6	1931	294	3.1	0.5	8274	471	13.4	0.7	4849	407	7.8	0.6	21957	726	35.4	1.1	17961	697	29	1.1	5777	389	9.3
0500000US21119	21119	Knott County, Kentucky	5776	227	5776	(X)	3943	233	68.3	3.6	1371	174	23.7	2.8	2947	239	51	4.2	941	157	16.3	2.7	297	89	5.1	1.6	81	40	1.4	0.7	699	155	12.1	2.5	349	117	6	2	1833	236	31.7	3.6	1599	230	27.7	3.6	651	116	11.3
0500000US21121	21121	Knox County, Kentucky	12524	316	12524	(X)	8228	431	65.7	3.1	3210	310	25.6	2.3	5863	474	46.8	3.6	2007	270	16	2.1	540	157	4.3	1.2	237	114	1.9	0.9	1825	314	14.6	2.5	966	244	7.7	1.9	4296	407	34.3	3.1	3870	397	30.9	3	1644	232	13.1
0500000US21123	21123	Larue County, Kentucky	5294	189	5294	(X)	3869	219	73.1	3.1	1533	165	29	2.8	2909	211	54.9	3.5	902	149	17	2.7	235	86	4.4	1.6	128	67	2.4	1.3	725	159	13.7	3	503	135	9.5	2.5	1425	173	26.9	3.1	1264	171	23.9	3.1	603	134	11.4
0500000US21125	21125	Laurel County, Kentucky	23184	386	23184	(X)	16500	522	71.2	2.1	6926	394	29.9	1.5	12064	570	52	2.4	4463	392	19.3	1.6	1172	259	5.1	1.1	583	188	2.5	0.8	3264	411	14.1	1.8	1880	331	8.1	1.4	6684	506	28.8	2.1	5680	460	24.5	1.9	2050	248	8.8
0500000US21127	21127	Lawrence County, Kentucky	5940	225	5940	(X)	4264	245	71.8	3.2	1557	163	26.2	2.5	3441	243	57.9	3.3	1234	156	20.8	2.4	209	81	3.5	1.4	73	39	1.2	0.7	614	124	10.3	2.1	250	86	4.2	1.5	1676	199	28.2	3.2	1499	186	25.2	3.1	703	131	11.8
0500000US21129	21129	Lee County, Kentucky	2957	158	2957	(X)	1741	172	58.9	4.6	603	133	20.4	4.3	1246	162	42.1	4.6	427	103	14.4	3.4	146	70	4.9	2.3	0	16	0	1	349	85	11.8	2.9	176	75	6	2.5	1216	146	41.1	4.6	1089	144	36.8	4.4	349	78	11.8
0500000US21131	21131	Leslie County, Kentucky	4212	211	4212	(X)	2930	239	69.6	4.7	1215	197	28.8	4.3	2203	230	52.3	4.8	891	174	21.2	4	171	72	4.1	1.7	72	49	1.7	1.2	556	136	13.2	3.2	252	105	6	2.4	1282	212	30.4	4.7	1155	213	27.4	4.8	456	134	10.8
0500000US21133	21133	Letcher County, Kentucky	9391	280	9391	(X)	6582	320	70.1	2.8	2182	235	23.2	2.4	5108	327	54.4	3.2	1521	229	16.2	2.3	373	115	4	1.2	174	97	1.9	1	1101	190	11.7	2	487	137	5.2	1.5	2809	285	29.9	2.8	2503	272	26.7	2.7	1153	175	12.3
0500000US21135	21135	Lewis County, Kentucky	5222	203	5222	(X)	3705	248	70.9	3.7	1486	167	28.5	2.8	2822	252	54	4.3	979	170	18.7	3.1	299	92	5.7	1.8	149	74	2.9	1.4	584	136	11.2	2.5	358	109	6.9	2	1517	202	29.1	3.7	1281	193	24.5	3.7	556	102	10.6
0500000US21137	21137	Lincoln County, Kentucky	9693	259	9693	(X)	6918	323	71.4	2.9	2864	268	29.5	2.6	4845	342	50	3.5	1778	255	18.3	2.6	671	174	6.9	1.7	314	134	3.2	1.4	1402	228	14.5	2.4	772	172	8	1.7	2775	293	28.6	2.9	2481	280	25.6	2.8	1284	163	13.2
0500000US21139	21139	Livingston County, Kentucky	3708	200	3708	(X)	2710	201	73.1	4	746	150	20.1	3.6	2212	200	59.7	5	469	120	12.6	3.1	155	71	4.2	1.9	94	54	2.5	1.4	343	101	9.3	2.6	183	78	4.9	2.1	998	162	26.9	4	928	162	25	4	472	103	12.7
0500000US21141	21141	Logan County, Kentucky	10862	294	10862	(X)	7083	420	65.2	3.3	2570	267	23.7	2.2	5264	374	48.5	3.1	1656	274	15.2	2.4	597	154	5.5	1.4	261	110	2.4	1	1222	193	11.3	1.8	653	154	6	1.4	3779	359	34.8	3.3	3323	315	30.6	2.9	1394	208	12.8
0500000US21143	21143	Lyon County, Kentucky	3263	226	3263	(X)	1913	193	58.6	4.8	485	116	14.9	3.3	1595	182	48.9	4.7	340	95	10.4	2.7	62	30	1.9	0.9	6	5	0.2	0.2	256	79	7.8	2.4	139	64	4.3	1.9	1350	192	41.4	4.8	1172	188	35.9	5	453	93	13.9
0500000US21145	21145	McCracken County, Kentucky	27409	473	27409	(X)	17475	524	63.8	1.6	6886	434	25.1	1.5	12687	495	46.3	1.8	4047	354	14.8	1.3	1059	244	3.9	0.9	616	217	2.2	0.8	3729	357	13.6	1.2	2223	240	8.1	0.8	9934	482	36.2	1.6	8871	459	32.4	1.6	3301	297	12
0500000US21147	21147	McCreary County, Kentucky	6210	308	6210	(X)	4495	341	72.4	4.2	1703	252	27.4	3.6	3194	297	51.4	3.9	1327	227	21.4	3.2	493	161	7.9	2.6	99	62	1.6	1	808	188	13	3	277	110	4.5	1.8	1715	271	27.6	4.2	1607	254	25.9	3.9	599	154	9.6
0500000US21149	21149	McLean County, Kentucky	3744	128	3744	(X)	2649	134	70.8	3.4	1114	117	29.8	2.8	2137	133	57.1	3.6	760	107	20.3	2.7	190	78	5.1	2.1	156	77	4.2	2.1	322	70	8.6	1.9	198	58	5.3	1.5	1095	144	29.2	3.4	963	132	25.7	3.2	431	91	11.5
0500000US21151	21151	Madison County, Kentucky	31752	546	31752	(X)	20284	534	63.9	1.6	8900	465	28	1.4	15042	527	47.4	1.7	6088	440	19.2	1.4	1487	280	4.7	0.9	762	197	2.4	0.6	3755	415	11.8	1.3	2050	304	6.5	1	11468	601	36.1	1.6	8635	505	27.2	1.5	2679	289	8.4
0500000US21153	21153	Magoffin County, Kentucky	4928	214	4928	(X)	3471	274	70.4	4.5	1407	169	28.6	3.3	2723	278	55.3	4.7	999	179	20.3	3.3	159	83	3.2	1.7	100	76	2	1.5	589	122	12	2.5	308	87	6.3	1.9	1457	231	29.6	4.5	1364	217	27.7	4.3	475	106	9.6
0500000US21155	21155	Marion County, Kentucky	7385	217	7385	(X)	4895	226	66.3	2.5	2314	218	31.3	2.7	3648	230	49.4	2.9	1485	180	20.1	2.4	408	133	5.5	1.8	267	114	3.6	1.5	839	145	11.4	2	562	126	7.6	1.7	2490	200	33.7	2.5	2185	200	29.6	2.5	893	124	12.1
0500000US21157	21157	Marshall County, Kentucky	12426	426	12426	(X)	9060	471	72.9	3.1	3175	300	25.6	2.2	7172	384	57.7	2.9	2224	246	17.9	1.8	577	222	4.6	1.7	273	123	2.2	1	1311	250	10.6	2	678	189	5.5	1.5	3366	419	27.1	3.1	2930	299	23.6	2.2	1339	234	10.8
0500000US21159	21159	Martin County, Kentucky	4381	266	4381	(X)	3201	288	73.1	4.9	1409	237	32.2	4.8	2337	272	53.3	5.1	849	197	19.4	4.1	317	146	7.2	3.3	243	133	5.5	3	547	149	12.5	3.4	317	124	7.2	2.8	1180	227	26.9	4.9	1000	217	22.8	4.7	449	133	10.2
0500000US21161	21161	Mason County, Kentucky	6636	254	6636	(X)	4714	265	71	3.1	1858	182	28	2.4	3416	247	51.5	3	1150	158	17.3	2.2	338	105	5.1	1.6	133	64	2	1	960	153	14.5	2.3	575	123	8.7	1.8	1922	219	29	3.1	1717	202	25.9	2.9	685	113	10.3
0500000US21163	21163	Meade County, Kentucky	10557	272	10557	(X)	8148	261	77.2	2.2	3606	269	34.2	2.3	6379	314	60.4	2.8	2589	278	24.5	2.5	664	155	6.3	1.5	344	120	3.3	1.1	1105	175	10.5	1.6	673	145	6.4	1.4	2409	260	22.8	2.2	1971	250	18.7	2.2	954	186	9
0500000US21165	21165	Menifee County, Kentucky	2404	167	2404	(X)	1716	147	71.4	5	659	151	27.4	6	1275	134	53	5.5	427	106	17.8	4.5	97	61	4	2.5	66	55	2.7	2.2	344	103	14.3	4.2	166	78	6.9	3.2	688	138	28.6	5	606	133	25.2	4.9	183	62	7.6
0500000US21167	21167	Mercer County, Kentucky	8770	240	8770	(X)	5966	305	68	2.9	2150	208	24.5	2.3	4481	312	51.1	3.3	1431	166	16.3	1.9	384	122	4.4	1.4	222	101	2.5	1.1	1101	194	12.6	2.2	497	109	5.7	1.2	2804	267	32	2.9	2428	255	27.7	2.9	1034	126	11.8
0500000US21169	21169	Metcalfe County, Kentucky	3918	200	3918	(X)	2658	197	67.8	4.3	1023	154	26.1	3.4	2167	190	55.3	4.4	811	124	20.7	2.9	184	88	4.7	2.2	64	46	1.6	1.2	307	83	7.8	2.1	148	83	3.8	2.1	1260	194	32.2	4.3	1093	176	27.9	4.1	415	85	10.6
0500000US21171	21171	Monroe County, Kentucky	4436	174	4436	(X)	2974	207	67	3.7	1078	119	24.3	2.4	2320	238	52.3	4.9	746	128	16.8	2.8	101	58	2.3	1.3	74	56	1.7	1.3	553	155	12.5	3.4	258	98	5.8	2.2	1462	169	33	3.7	1208	158	27.2	3.5	652	109	14.7
0500000US21173	21173	Montgomery County, Kentucky	10288	269	10288	(X)	6935	303	67.4	2.8	3106	262	30.2	2.4	4903	305	47.7	3.1	1909	256	18.6	2.5	476	166	4.6	1.6	344	144	3.3	1.4	1556	249	15.1	2.4	853	217	8.3	2.1	3353	320	32.6	2.8	2742	307	26.7	2.8	908	159	8.8
0500000US21175	21175	Morgan County, Kentucky	4841	185	4841	(X)	3586	188	74.1	2.9	1293	138	26.7	2.4	2802	190	57.9	3.4	893	122	18.4	2.3	170	64	3.5	1.3	112	55	2.3	1.1	614	112	12.7	2.3	288	76	5.9	1.6	1255	150	25.9	2.9	1048	147	21.6	2.9	449	86	9.3
0500000US21177	21177	Muhlenberg County, Kentucky	11619	430	11619	(X)	8459	386	72.8	2.4	3110	285	26.8	2	6528	342	56.2	2.6	2025	237	17.4	1.8	457	138	3.9	1.2	178	75	1.5	0.6	1474	218	12.7	1.8	907	176	7.8	1.5	3160	318	27.2	2.4	2923	310	25.2	2.4	1308	181	11.3
0500000US21179	21179	Nelson County, Kentucky	16660	307	16660	(X)	12451	431	74.7	2.4	5825	349	35	2	9261	452	55.6	2.9	3836	337	23	2	919	221	5.5	1.3	568	205	3.4	1.2	2271	288	13.6	1.7	1421	271	8.5	1.6	4209	409	25.3	2.4	3584	401	21.5	2.3	1234	216	7.4
0500000US21181	21181	Nicholas County, Kentucky	2861	126	2861	(X)	2026	124	70.8	3.7	846	99	29.6	3.2	1607	134	56.2	4.5	602	92	21	3.2	67	36	2.3	1.3	46	31	1.6	1.1	352	95	12.3	3.2	198	75	6.9	2.6	835	118	29.2	3.7	712	113	24.9	3.7	307	79	10.7
0500000US21183	21183	Ohio County, Kentucky	8573	285	8573	(X)	6306	248	73.6	2.5	2433	196	28.4	2.1	4959	251	57.8	2.8	1637	176	19.1	2	286	106	3.3	1.2	148	78	1.7	0.9	1061	156	12.4	1.8	648	134	7.6	1.6	2267	251	26.4	2.5	1962	242	22.9	2.5	946	153	11
0500000US21185	21185	Oldham County, Kentucky	19610	270	19610	(X)	16011	340	81.6	1.5	7795	318	39.8	1.4	13312	353	67.9	1.6	6180	305	31.5	1.4	846	193	4.3	1	491	130	2.5	0.7	1853	246	9.4	1.3	1124	195	5.7	1	3599	313	18.4	1.5	2937	303	15	1.5	1010	155	5.2
0500000US21187	21187	Owen County, Kentucky	4355	225	4355	(X)	2986	234	68.6	4.5	1260	138	28.9	2.9	2187	215	50.2	4.8	840	152	19.3	3.6	333	98	7.6	2.2	171	76	3.9	1.7	466	131	10.7	2.9	249	109	5.7	2.4	1369	216	31.4	4.5	1278	212	29.3	4.4	476	109	10.9
0500000US21189	21189	Owsley County, Kentucky	1740	123	1740	(X)	1130	114	64.9	6.9	425	108	24.4	6.2	728	116	41.8	6.8	219	78	12.6	4.6	109	64	6.3	3.7	30	33	1.7	1.9	293	87	16.8	5	176	75	10.1	4.3	610	142	35.1	6.9	607	143	34.9	6.9	269	83	15.5
0500000US21191	21191	Pendleton County, Kentucky	5349	214	5349	(X)	3555	278	66.5	4.3	1469	185	27.5	3.4	2852	271	53.3	4.6	1091	176	20.4	3.3	212	91	4	1.7	102	61	1.9	1.1	491	120	9.2	2.2	276	94	5.2	1.8	1794	240	33.5	4.3	1465	230	27.4	4.1	601	116	11.2
0500000US21193	21193	Perry County, Kentucky	11005	349	11005	(X)	7792	349	70.8	2.9	3027	288	27.5	2.6	5563	338	50.5	3	1927	245	17.5	2.2	591	156	5.4	1.4	276	117	2.5	1.1	1638	276	14.9	2.5	824	205	7.5	1.9	3213	352	29.2	2.9	2636	302	24	2.5	1145	198	10.4
0500000US21195	21195	Pike County, Kentucky	26312	534	26312	(X)	17754	600	67.5	2	6871	406	26.1	1.4	13112	564	49.8	2.1	4906	370	18.6	1.3	1408	222	5.4	0.8	509	139	1.9	0.5	3234	310	12.3	1.2	1456	223	5.5	0.8	8558	579	32.5	2	7509	583	28.5	2	2910	285	11.1
0500000US21197	21197	Powell County, Kentucky	4628	221	4628	(X)	2917	249	63	4.3	1206	199	26.1	3.8	1979	223	42.8	4.6	725	145	15.7	3	328	125	7.1	2.6	138	77	3	1.6	610	168	13.2	3.5	343	133	7.4	2.8	1711	213	37	4.3	1453	207	31.4	4.3	538	122	11.6
0500000US21199	21199	Pulaski County, Kentucky	26052	516	26052	(X)	17671	550	67.8	2	6954	417	26.7	1.5	13142	538	50.4	2.1	4362	375	16.7	1.4	973	201	3.7	0.8	435	147	1.7	0.6	3556	367	13.6	1.4	2157	301	8.3	1.1	8381	581	32.2	2	7276	549	27.9	1.9	3029	274	11.6
0500000US21201	21201	Robertson County, Kentucky	911	91	911	(X)	590	65	64.8	6.1	244	45	26.8	5.5	486	58	53.3	6.9	187	43	20.5	5.4	15	15	1.6	1.7	8	12	0.9	1.3	89	43	9.8	4.4	49	28	5.4	3	321	75	35.2	6.1	292	73	32.1	6.3	156	51	17.1
0500000US21203	21203	Rockcastle County, Kentucky	6634	252	6634	(X)	4753	261	71.6	3	1965	223	29.6	2.8	3537	264	53.3	3.3	1417	214	21.4	2.8	244	82	3.7	1.2	136	67	2.1	1	972	169	14.7	2.6	412	118	6.2	1.8	1881	211	28.4	3	1694	204	25.5	3	745	128	11.2
0500000US21205	21205	Rowan County, Kentucky	8407	374	8407	(X)	5216	321	62	3.4	2283	262	27.2	2.8	4106	346	48.8	3.7	1773	257	21.1	2.8	288	126	3.4	1.5	88	52	1	0.6	822	206	9.8	2.5	422	142	5	1.7	3191	352	38	3.4	2633	325	31.3	3.4	873	198	10.4
0500000US21207	21207	Russell County, Kentucky	7223	249	7223	(X)	4628	258	64.1	3.4	1550	195	21.5	2.6	3340	276	46.2	3.9	980	154	13.6	2	431	136	6	1.9	215	98	3	1.3	857	176	11.9	2.4	355	105	4.9	1.5	2595	279	35.9	3.4	2293	243	31.7	3.1	1094	164	15.1
0500000US21209	21209	Scott County, Kentucky	18306	336	18306	(X)	13212	455	72.2	2.2	6536	306	35.7	1.5	10104	482	55.2	2.5	4601	321	25.1	1.7	863	196	4.7	1.1	481	160	2.6	0.9	2245	337	12.3	1.8	1454	248	7.9	1.3	5094	420	27.8	2.2	4276	407	23.4	2.2	1282	192	7
0500000US21211	21211	Shelby County, Kentucky	15665	256	15665	(X)	11732	404	74.9	2.5	5251	325	33.5	2.1	8984	425	57.4	2.6	3558	317	22.7	2	846	225	5.4	1.4	530	192	3.4	1.2	1902	304	12.1	1.9	1163	253	7.4	1.6	3933	399	25.1	2.5	3330	358	21.3	2.2	1213	209	7.7
0500000US21213	21213	Simpson County, Kentucky	6660	202	6660	(X)	4493	289	67.5	3.9	1648	223	24.7	3.1	3371	276	50.6	4.2	1072	182	16.1	2.7	406	142	6.1	2.1	338	124	5.1	1.8	716	198	10.8	2.9	238	104	3.6	1.5	2167	274	32.5	3.9	1810	242	27.2	3.5	736	145	11.1
0500000US21215	21215	Spencer County, Kentucky	6301	176	6301	(X)	5100	222	80.9	3.3	2195	186	34.8	2.8	4245	238	67.4	3.8	1599	173	25.4	2.7	244	91	3.9	1.4	205	87	3.3	1.4	611	157	9.7	2.5	391	153	6.2	2.4	1201	220	19.1	3.3	955	197	15.2	3	290	94	4.6
0500000US21217	21217	Taylor County, Kentucky	9491	294	9491	(X)	6410	290	67.5	2.9	2590	227	27.3	2.3	4710	299	49.6	3	1660	230	17.5	2.4	367	129	3.9	1.3	161	87	1.7	0.9	1333	217	14	2.3	769	187	8.1	2	3081	316	32.5	2.9	2730	304	28.8	2.9	1254	187	13.2
0500000US21219	21219	Todd County, Kentucky	4567	170	4567	(X)	3318	185	72.7	3.4	1473	146	32.3	2.9	2430	152	53.2	3.5	975	129	21.3	2.8	281	93	6.2	2	110	53	2.4	1.1	607	133	13.3	2.8	388	110	8.5	2.4	1249	169	27.3	3.4	1096	159	24	3.2	483	113	10.6
0500000US21221	21221	Trigg County, Kentucky	6055	267	6055	(X)	4213	288	69.6	4.1	1458	181	24.1	2.8	3271	266	54	4.2	914	175	15.1	2.8	247	113	4.1	1.8	116	73	1.9	1.2	695	165	11.5	2.6	428	159	7.1	2.6	1842	275	30.4	4.1	1586	262	26.2	4	752	161	12.4
0500000US21223	21223	Trimble County, Kentucky	3578	121	3578	(X)	2505	162	70	4.4	1058	161	29.6	4.4	2047	204	57.2	5.6	715	147	20	4	109	68	3	1.9	97	65	2.7	1.8	349	102	9.8	2.9	246	98	6.9	2.8	1073	167	30	4.4	905	150	25.3	3.8	318	77	8.9
0500000US21225	21225	Union County, Kentucky	5620	168	5620	(X)	3820	241	68	3.9	1599	209	28.5	3.5	2803	214	49.9	3.8	1014	128	18	2.3	225	99	4	1.7	145	83	2.6	1.5	792	145	14.1	2.5	440	131	7.8	2.3	1800	227	32	3.9	1619	220	28.8	3.8	727	124	12.9
0500000US21227	21227	Warren County, Kentucky	44923	596	44923	(X)	28830	684	64.2	1.6	12768	606	28.4	1.4	21263	497	47.3	1.2	8545	434	19	1	2060	349	4.6	0.8	1015	247	2.3	0.6	5507	452	12.3	1	3208	418	7.1	0.9	16093	797	35.8	1.6	12223	689	27.2	1.4	3808	296	8.5
0500000US21229	21229	Washington County, Kentucky	4514	158	4514	(X)	3120	187	69.1	3.7	1352	164	30	3.3	2405	197	53.3	4.2	904	149	20	3.1	184	105	4.1	2.3	159	100	3.5	2.2	531	130	11.8	2.9	289	97	6.4	2.2	1394	178	30.9	3.7	1261	178	27.9	3.7	605	120	13.4
0500000US21231	21231	Wayne County, Kentucky	8004	329	8004	(X)	5450	306	68.1	3.1	2131	256	26.6	3	4040	313	50.5	3.5	1431	223	17.9	2.6	411	115	5.1	1.4	199	67	2.5	0.8	999	199	12.5	2.5	501	148	6.3	1.9	2554	286	31.9	3.1	2327	252	29.1	2.8	923	204	11.5
0500000US21233	21233	Webster County, Kentucky	5057	189	5057	(X)	3665	195	72.5	3.6	1299	158	25.7	2.9	2942	172	58.2	3.4	989	137	19.6	2.5	235	64	4.6	1.3	91	41	1.8	0.8	488	134	9.6	2.6	219	113	4.3	2.2	1392	204	27.5	3.6	1266	191	25	3.4	520	100	10.3
0500000US21235	21235	Whitley County, Kentucky	12931	363	12931	(X)	9332	402	72.2	2.4	3772	324	29.2	2.2	6489	406	50.2	3	2501	306	19.3	2.2	1046	211	8.1	1.6	411	149	3.2	1.1	1797	274	13.9	2	860	206	6.7	1.6	3599	328	27.8	2.4	3072	304	23.8	2.2	1406	184	10.9
0500000US21237	21237	Wolfe County, Kentucky	2826	156	2826	(X)	1816	180	64.3	4.9	685	122	24.2	4.2	1290	185	45.6	5.6	402	118	14.2	4.1	143	64	5.1	2.2	91	58	3.2	2	383	112	13.6	4	192	81	6.8	2.9	1010	144	35.7	4.9	883	151	31.2	5.1	295	90	10.4
0500000US21239	21239	Woodford County, Kentucky	9716	273	9716	(X)	6633	285	68.3	2.6	2842	268	29.3	2.5	5304	280	54.6	2.9	2191	239	22.6	2.3	404	135	4.2	1.4	141	75	1.5	0.8	925	160	9.5	1.6	510	145	5.2	1.5	3083	282	31.7	2.6	2521	250	25.9	2.4	908	150	9.3
0500000US39001	39001	Adams County, Ohio	10734	334	10734	(X)	7478	347	69.7	2.3	3167	246	29.5	2	5574	306	51.9	2.4	2027	211	18.9	1.8	507	133	4.7	1.2	308	119	2.9	1.1	1397	207	13	1.9	832	182	7.8	1.7	3256	268	30.3	2.3	2849	277	26.5	2.5	1320	194	12.3
0500000US39003	39003	Allen County, Ohio	40191	528	40191	(X)	26998	602	67.2	1.2	11876	421	29.5	1	19149	605	47.6	1.5	7029	448	17.5	1.1	1959	338	4.9	0.8	1185	262	2.9	0.6	5890	409	14.7	1	3662	360	9.1	0.9	13193	515	32.8	1.2	11213	517	27.9	1.2	4619	321	11.5
0500000US39005	39005	Ashland County, Ohio	20339	422	20339	(X)	14228	397	70	1.8	5680	323	27.9	1.5	11565	397	56.9	1.9	4180	298	20.6	1.4	750	154	3.7	0.8	357	116	1.8	0.6	1913	258	9.4	1.3	1143	222	5.6	1.1	6111	422	30	1.8	5103	386	25.1	1.7	2266	247	11.1
0500000US39007	39007	Ashtabula County, Ohio	38933	547	38933	(X)	25374	512	65.2	1.4	10364	454	26.6	1.1	18614	487	47.8	1.3	6336	384	16.3	1	2040	300	5.2	0.8	1240	228	3.2	0.6	4720	329	12.1	0.8	2788	268	7.2	0.7	13559	638	34.8	1.4	11271	589	28.9	1.3	4741	315	12.2
0500000US39009	39009	Athens County, Ohio	22208	531	22208	(X)	12141	382	54.7	1.5	4954	291	22.3	1.3	9017	416	40.6	1.6	3282	288	14.8	1.3	1134	207	5.1	0.9	487	141	2.2	0.6	1990	305	9	1.4	1185	279	5.3	1.3	10067	459	45.3	1.5	7201	430	32.4	1.8	1840	222	8.3
0500000US39011	39011	Auglaize County, Ohio	18115	277	18115	(X)	12565	338	69.4	1.9	5048	250	27.9	1.3	10422	337	57.5	1.9	3897	231	21.5	1.3	693	149	3.8	0.8	347	118	1.9	0.7	1450	231	8	1.3	804	178	4.4	1	5550	383	30.6	1.9	4666	371	25.8	1.9	2269	205	12.5
0500000US39013	39013	Belmont County, Ohio	28007	383	28007	(X)	18254	471	65.2	1.4	6641	277	23.7	0.9	14128	408	50.4	1.3	4726	274	16.9	0.9	1494	248	5.3	0.9	548	132	2	0.5	2632	271	9.4	0.9	1367	187	4.9	0.7	9753	428	34.8	1.4	8639	437	30.8	1.5	3773	238	13.5
0500000US39015	39015	Brown County, Ohio	16587	390	16587	(X)	12160	401	73.3	2.1	4697	286	28.3	1.5	9366	387	56.5	2.3	3184	286	19.2	1.7	694	162	4.2	1	348	106	2.1	0.6	2100	263	12.7	1.6	1165	216	7	1.3	4427	380	26.7	2.1	3728	354	22.5	2	1595	220	9.6
0500000US39017	39017	Butler County, Ohio	134934	922	134934	(X)	93895	1109	69.6	0.7	42182	990	31.3	0.7	71444	1020	52.9	0.7	29011	887	21.5	0.6	6312	546	4.7	0.4	3165	400	2.3	0.3	16139	777	12	0.6	10006	605	7.4	0.4	41039	1020	30.4	0.7	32624	995	24.2	0.7	12070	549	8.9
0500000US39019	39019	Carroll County, Ohio	10922	283	10922	(X)	7927	353	72.6	2.6	2919	227	26.7	1.9	6622	321	60.6	2.7	2229	238	20.4	2.1	484	133	4.4	1.2	214	76	2	0.7	821	164	7.5	1.5	476	137	4.4	1.2	2995	296	27.4	2.6	2463	255	22.6	2.2	1218	187	11.2
0500000US39021	39021	Champaign County, Ohio	15163	276	15163	(X)	11051	361	72.9	2.1	4638	251	30.6	1.5	8596	357	56.7	2.2	3157	244	20.8	1.6	678	143	4.5	0.9	455	116	3	0.8	1777	235	11.7	1.5	1026	181	6.8	1.2	4112	329	27.1	2.1	3482	305	23	2	1519	166	10
0500000US39023	39023	Clark County, Ohio	54969	667	54969	(X)	35844	577	65.2	1	15065	546	27.4	0.9	25361	626	46.1	1.2	8747	438	15.9	0.7	2639	332	4.8	0.6	1399	246	2.5	0.4	7844	389	14.3	0.7	4919	328	8.9	0.6	19125	682	34.8	1	16081	596	29.3	0.9	6575	356	12
0500000US39025	39025	Clermont County, Ohio	74187	690	74187	(X)	53163	827	71.7	0.9	23151	661	31.2	0.8	41692	841	56.2	1.1	16895	664	22.8	0.9	3824	445	5.2	0.6	1963	325	2.6	0.4	7647	569	10.3	0.7	4293	514	5.8	0.7	21024	743	28.3	0.9	17608	699	23.7	0.9	6626	515	8.9
0500000US39027	39027	Clinton County, Ohio	16052	311	16052	(X)	11295	352	70.4	2	5113	293	31.9	1.7	8453	358	52.7	2.2	3124	295	19.5	1.8	956	193	6	1.2	739	175	4.6	1.1	1886	263	11.7	1.6	1250	211	7.8	1.3	4757	345	29.6	2	4046	343	25.2	1.9	1832	206	11.4
0500000US39029	39029	Columbiana County, Ohio	42184	600	42184	(X)	28589	697	67.8	1.3	10841	552	25.7	1.3	21662	591	51.4	1.2	7269	420	17.2	1	2018	306	4.8	0.7	1012	223	2.4	0.5	4909	444	11.6	1	2560	321	6.1	0.8	13595	580	32.2	1.3	11312	563	26.8	1.3	4862	342	11.5
0500000US39031	39031	Coshocton County, Ohio	14561	260	14561	(X)	10017	346	68.8	2.1	3791	236	26	1.5	7759	331	53.3	2.2	2686	183	18.4	1.2	651	157	4.5	1.1	253	101	1.7	0.7	1607	252	11	1.7	852	172	5.9	1.2	4544	325	31.2	2.1	3927	319	27	2.1	1735	212	11.9
0500000US39033	39033	Crawford County, Ohio	17625	277	17625	(X)	11782	296	66.8	1.7	4317	249	24.5	1.4	9188	328	52.1	1.9	2880	242	16.3	1.4	821	166	4.7	0.9	477	142	2.7	0.8	1773	214	10.1	1.2	960	181	5.4	1	5843	353	33.2	1.7	5039	323	28.6	1.6	2446	217	13.9
0500000US39035	39035	Cuyahoga County, Ohio	534721	2402	534721	(X)	308075	2161	57.6	0.4	132087	1614	24.7	0.3	198734	2085	37.2	0.4	73633	1362	13.8	0.2	23194	944	4.3	0.2	10113	697	1.9	0.1	86147	1499	16.1	0.3	48341	1269	9	0.2	226646	2328	42.4	0.4	196927	2168	36.8	0.3	68981	1330	12.9
0500000US39037	39037	Darke County, Ohio	20929	257	20929	(X)	14124	355	67.5	1.5	5733	264	27.4	1.2	11254	376	53.8	1.6	4047	266	19.3	1.2	793	138	3.8	0.7	401	110	1.9	0.5	2077	189	9.9	0.9	1285	150	6.1	0.7	6805	323	32.5	1.5	6018	324	28.8	1.5	2700	229	12.9
0500000US39039	39039	Defiance County, Ohio	15332	263	15332	(X)	10814	320	70.5	1.8	4133	286	27	1.8	8056	329	52.5	2.1	2566	239	16.7	1.6	970	208	6.3	1.4	515	153	3.4	1	1788	232	11.7	1.5	1052	186	6.9	1.2	4518	299	29.5	1.8	3640	279	23.7	1.7	1341	165	8.7
0500000US39041	39041	Delaware County, Ohio	65029	473	65029	(X)	49614	711	76.3	1.1	26001	653	40	1	42675	794	65.6	1.2	21498	621	33.1	0.9	2071	307	3.2	0.5	1260	253	1.9	0.4	4868	415	7.5	0.6	3243	382	5	0.6	15415	729	23.7	1.1	12950	586	19.9	0.9	4157	343	6.4
0500000US39043	39043	Erie County, Ohio	31998	519	31998	(X)	20542	572	64.2	1.5	7713	389	24.1	1.1	15456	611	48.3	1.8	4889	342	15.3	1	1349	234	4.2	0.7	654	177	2	0.5	3737	359	11.7	1.1	2170	283	6.8	0.9	11456	528	35.8	1.5	9721	511	30.4	1.5	4070	297	12.7
0500000US39045	39045	Fairfield County, Ohio	54581	510	54581	(X)	39454	707	72.3	1.2	18348	572	33.6	1	31185	738	57.1	1.3	13120	516	24	0.9	2297	343	4.2	0.6	1420	271	2.6	0.5	5972	502	10.9	0.9	3808	380	7	0.7	15127	661	27.7	1.2	12586	604	23.1	1.1	4866	363	8.9
0500000US39047	39047	Fayette County, Ohio	11532	233	11532	(X)	7646	281	66.3	2.2	3232	238	28	2	5648	269	49	2.3	1890	216	16.4	1.9	522	127	4.5	1.1	335	92	2.9	0.8	1476	227	12.8	1.9	1007	203	8.7	1.7	3886	283	33.7	2.2	3295	274	28.6	2.2	1369	156	11.9
0500000US39049	39049	Franklin County, Ohio	474683	2001	474683	(X)	277397	2521	58.4	0.5	134323	1889	28.3	0.4	189330	2266	39.9	0.4	82000	1684	17.3	0.3	20173	1130	4.2	0.2	10130	794	2.1	0.2	67894	1501	14.3	0.3	42193	1335	8.9	0.3	197286	2379	41.6	0.5	153750	2003	32.4	0.4	38601	1190	8.1
0500000US39051	39051	Fulton County, Ohio	16333	184	16333	(X)	12035	244	73.7	1.5	4953	256	30.3	1.5	9831	262	60.2	1.7	3553	224	21.8	1.3	789	155	4.8	0.9	483	131	3	0.8	1415	226	8.7	1.4	917	223	5.6	1.4	4298	264	26.3	1.5	3850	284	23.6	1.6	1566	186	9.6
0500000US39053	39053	Gallia County, Ohio	11502	300	11502	(X)	8090	328	70.3	2.5	3076	225	26.7	1.8	6007	340	52.2	2.6	2045	212	17.8	1.8	679	180	5.9	1.6	341	135	3	1.2	1404	221	12.2	1.9	690	169	6	1.5	3412	312	29.7	2.5	2971	282	25.8	2.2	1472	192	12.8
0500000US39055	39055	Geauga County, Ohio	34753	314	34753	(X)	25861	414	74.4	1.3	10312	390	29.7	1.1	21720	433	62.5	1.4	8335	349	24	1	1072	284	3.1	0.8	397	165	1.1	0.5	3069	305	8.8	0.9	1580	265	4.5	0.8	8892	475	25.6	1.3	7413	389	21.3	1	3086	276	8.9
0500000US39057	39057	Greene County, Ohio	63549	696	63549	(X)	41992	645	66.1	0.9	17552	579	27.6	0.9	32870	631	51.7	1	12289	529	19.3	0.8	2292	296	3.6	0.5	1251	211	2	0.3	6830	505	10.7	0.8	4012	365	6.3	0.6	21557	699	33.9	0.9	17953	594	28.3	0.9	6295	397	9.9
0500000US39059	39059	Guernsey County, Ohio	15564	349	15564	(X)	10621	376	68.2	2	4278	278	27.5	1.7	8008	324	51.5	1.9	2785	221	17.9	1.4	759	158	4.9	1	399	126	2.6	0.8	1854	256	11.9	1.6	1094	194	7	1.2	4943	331	31.8	2	4149	293	26.7	1.8	1924	204	12.4
0500000US39061	39061	Hamilton County, Ohio	329062	1560	329062	(X)	194588	1465	59.1	0.4	87292	1325	26.5	0.4	131194	1643	39.9	0.5	50354	1229	15.3	0.4	13637	910	4.1	0.3	7052	645	2.1	0.2	49757	1124	15.1	0.3	29886	936	9.1	0.3	134474	1603	40.9	0.4	112799	1645	34.3	0.4	36483	1104	11.1
0500000US39063	39063	Hancock County, Ohio	30795	425	30795	(X)	20068	458	65.2	1.5	8415	372	27.3	1.2	15278	453	49.6	1.4	5318	376	17.3	1.2	1422	269	4.6	0.9	998	231	3.2	0.8	3368	382	10.9	1.2	2099	309	6.8	1	10727	530	34.8	1.5	9056	521	29.4	1.5	3293	270	10.7
0500000US39065	39065	Hardin County, Ohio	11438	290	11438	(X)	7664	343	67	2.8	3326	286	29.1	2.3	5848	350	51.1	3	2236	234	19.5	2	522	144	4.6	1.2	297	98	2.6	0.8	1294	214	11.3	1.9	793	186	6.9	1.6	3774	345	33	2.8	3183	318	27.8	2.6	1327	196	11.6
0500000US39067	39067	Harrison County, Ohio	6333	218	6333	(X)	4390	213	69.3	2.9	1745	149	27.6	2.1	3444	211	54.4	3.2	1192	129	18.8	2	304	95	4.8	1.5	155	77	2.4	1.2	642	115	10.1	1.8	398	111	6.3	1.7	1943	208	30.7	2.9	1650	204	26.1	2.9	779	148	12.3
0500000US39069	39069	Henry County, Ohio	11075	176	11075	(X)	7779	218	70.2	1.8	3239	221	29.2	1.8	6295	219	56.8	2	2271	180	20.5	1.5	513	105	4.6	0.9	323	90	2.9	0.8	971	187	8.8	1.7	645	166	5.8	1.5	3296	221	29.8	1.8	2747	208	24.8	1.8	1246	129	11.3
0500000US39071	39071	Highland County, Ohio	16837	358	16837	(X)	11609	358	68.9	2	4710	297	28	1.6	8606	424	51.1	2.4	3089	325	18.3	1.8	1051	221	6.2	1.3	593	172	3.5	1	1952	237	11.6	1.4	1028	172	6.1	1	5228	376	31.1	2	4390	367	26.1	2	1937	243	11.5
0500000US39073	39073	Hocking County, Ohio	11426	287	11426	(X)	7970	344	69.8	2.3	3171	229	27.8	1.8	6258	336	54.8	2.5	2241	216	19.6	1.7	479	122	4.2	1.1	249	96	2.2	0.8	1233	192	10.8	1.6	681	167	6	1.5	3456	270	30.2	2.3	3016	279	26.4	2.4	1141	187	10
0500000US39075	39075	Holmes County, Ohio	12516	239	12516	(X)	10142	286	81	1.7	5073	287	40.5	2.1	8993	305	71.9	2.1	4560	261	36.4	2	353	118	2.8	0.9	86	43	0.7	0.3	796	185	6.4	1.5	427	124	3.4	1	2374	214	19	1.7	2142	212	17.1	1.7	1036	158	8.3
0500000US39077	39077	Huron County, Ohio	22507	310	22507	(X)	15847	342	70.4	1.4	6874	300	30.5	1.2	12035	353	53.5	1.5	4650	299	20.7	1.3	1116	219	5	1	619	142	2.8	0.6	2696	284	12	1.3	1605	235	7.1	1	6660	356	29.6	1.4	5385	364	23.9	1.5	2338	224	10.4
0500000US39079	39079	Jackson County, Ohio	13204	335	13204	(X)	8980	356	68	2.7	3775	282	28.6	2	6442	369	48.8	2.9	2344	249	17.8	1.8	792	172	6	1.3	397	132	3	1	1746	258	13.2	1.9	1034	208	7.8	1.5	4224	407	32	2.7	3627	357	27.5	2.4	1484	183	11.2
0500000US39081	39081	Jefferson County, Ohio	28176	404	28176	(X)	18402	477	65.3	1.4	6515	364	23.1	1.2	13614	385	48.3	1.4	4224	308	15	1.1	1434	200	5.1	0.7	486	141	1.7	0.5	3354	330	11.9	1.1	1805	244	6.4	0.8	9774	437	34.7	1.4	8434	409	29.9	1.4	4041	266	14.3
0500000US39083	39083	Knox County, Ohio	22642	387	22642	(X)	15448	383	68.2	1.7	6526	333	28.8	1.4	12402	380	54.8	1.8	4631	292	20.5	1.3	828	184	3.7	0.8	435	143	1.9	0.6	2218	255	9.8	1.1	1460	252	6.4	1.1	7194	447	31.8	1.7	5865	420	25.9	1.7	2646	228	11.7
0500000US39085	39085	Lake County, Ohio	94089	720	94089	(X)	61501	742	65.4	0.8	24260	598	25.8	0.6	47521	836	50.5	1	17039	572	18.1	0.6	3898	387	4.1	0.4	1807	260	1.9	0.3	10082	528	10.7	0.5	5414	398	5.8	0.4	32588	885	34.6	0.8	27728	812	29.5	0.8	11145	511	11.8
0500000US39087	39087	Lawrence County, Ohio	23622	560	23622	(X)	15928	518	67.4	1.6	5806	415	24.6	1.6	11546	518	48.9	2	3677	355	15.6	1.5	1157	214	4.9	0.9	601	179	2.5	0.7	3225	331	13.7	1.3	1528	290	6.5	1.2	7694	422	32.6	1.6	6663	398	28.2	1.5	3105	262	13.1
0500000US39089	39089	Licking County, Ohio	64146	596	64146	(X)	44859	693	69.9	0.9	19081	567	29.7	0.8	35240	790	54.9	1.2	13534	643	21.1	1	2649	360	4.1	0.6	1534	326	2.4	0.5	6970	508	10.9	0.8	4013	418	6.3	0.6	19287	614	30.1	0.9	16123	662	25.1	1	6253	389	9.7
0500000US39091	39091	Logan County, Ohio	18471	355	18471	(X)	12905	412	69.9	2	5073	323	27.5	1.6	9547	347	51.7	1.9	3143	296	17	1.6	1067	217	5.8	1.2	592	186	3.2	1	2291	290	12.4	1.5	1338	241	7.2	1.3	5566	405	30.1	2	4489	384	24.3	1.9	1892	215	10.2
0500000US39093	39093	Lorain County, Ohio	117134	799	117134	(X)	80072	1010	68.4	0.9	32724	759	27.9	0.6	58362	946	49.8	0.8	20864	688	17.8	0.6	5498	452	4.7	0.4	2380	346	2	0.3	16212	728	13.8	0.6	9480	630	8.1	0.5	37062	1116	31.6	0.9	31453	1051	26.9	0.8	12340	581	10.5
0500000US39095	39095	Lucas County, Ohio	178121	967	178121	(X)	107529	1068	60.4	0.5	48032	911	27	0.5	70278	1112	39.5	0.6	26290	826	14.8	0.4	9001	632	5.1	0.4	4690	481	2.6	0.3	28250	919	15.9	0.5	17052	739	9.6	0.4	70592	1060	39.6	0.5	58525	1010	32.9	0.5	19367	714	10.9
0500000US39097	39097	Madison County, Ohio	14676	296	14676	(X)	10331	357	70.4	2	4470	261	30.5	1.6	8048	340	54.8	2.2	3204	242	21.8	1.7	645	170	4.4	1.1	309	103	2.1	0.7	1638	210	11.2	1.4	957	206	6.5	1.4	4345	306	29.6	2	3741	281	25.5	1.8	1736	161	11.8
0500000US39099	39099	Mahoning County, Ohio	97624	850	97624	(X)	60643	845	62.1	0.8	23279	651	23.8	0.6	41511	789	42.5	0.8	13450	516	13.8	0.5	4443	437	4.6	0.4	2030	311	2.1	0.3	14689	674	15	0.7	7799	552	8	0.6	36981	928	37.9	0.8	32501	805	33.3	0.7	13975	459	14.3
0500000US39101	39101	Marion County, Ohio	24586	470	24586	(X)	16853	524	68.5	1.5	6455	384	26.3	1.3	12323	489	50.1	1.7	3931	336	16	1.3	1331	223	5.4	0.9	778	187	3.2	0.7	3199	295	13	1.2	1746	238	7.1	0.9	7733	391	31.5	1.5	6544	381	26.6	1.6	2879	248	11.7
0500000US39103	39103	Medina County, Ohio	65950	546	65950	(X)	48135	619	73	0.8	21047	501	31.9	0.8	39413	691	59.8	1	16134	473	24.5	0.7	2809	290	4.3	0.4	1479	237	2.2	0.4	5913	436	9	0.7	3434	359	5.2	0.5	17815	598	27	0.8	14895	576	22.6	0.8	6254	365	9.5
0500000US39105	39105	Meigs County, Ohio	9486	234	9486	(X)	6549	271	69	2.4	2414	204	25.4	1.9	4942	229	52.1	2.4	1558	164	16.4	1.7	570	152	6	1.6	316	114	3.3	1.2	1037	140	10.9	1.4	540	125	5.7	1.3	2937	243	31	2.4	2470	233	26	2.4	933	137	9.8
0500000US39107	39107	Mercer County, Ohio	15923	294	15923	(X)	11146	337	70	1.8	4586	254	28.8	1.5	9244	323	58.1	1.8	3567	224	22.4	1.3	687	168	4.3	1.1	362	126	2.3	0.8	1215	210	7.6	1.3	657	152	4.1	0.9	4777	312	30	1.8	4075	306	25.6	1.8	2083	217	13.1
0500000US39109	39109	Miami County, Ohio	41169	506	41169	(X)	27850	631	67.6	1.3	11320	462	27.5	1.1	21570	604	52.4	1.4	7326	412	17.8	1	2041	301	5	0.7	1268	245	3.1	0.6	4239	393	10.3	0.9	2726	346	6.6	0.8	13319	574	32.4	1.3	11138	601	27.1	1.4	4850	389	11.8
0500000US39111	39111	Monroe County, Ohio	6056	214	6056	(X)	4150	219	68.5	2.7	1452	150	24	2	3276	195	54.1	3.1	972	121	16.1	1.8	315	88	5.2	1.4	231	74	3.8	1.2	559	117	9.2	1.8	249	77	4.1	1.2	1906	175	31.5	2.7	1648	167	27.2	2.6	786	115	13
0500000US39113	39113	Montgomery County, Ohio	222673	1507	222673	(X)	133947	1398	60.2	0.6	57613	1168	25.9	0.5	90167	1262	40.5	0.6	32670	1039	14.7	0.5	9851	679	4.4	0.3	5128	508	2.3	0.2	33929	966	15.2	0.4	19815	789	8.9	0.4	88726	1631	39.8	0.6	76899	1479	34.5	0.6	28311	734	12.7
0500000US39115	39115	Morgan County, Ohio	6056	219	6056	(X)	4366	287	72.1	3.4	1526	179	25.2	2.4	3426	239	56.6	3.3	1046	162	17.3	2.4	261	111	4.3	1.8	108	54	1.8	0.9	679	136	11.2	2.2	372	111	6.1	1.8	1690	196	27.9	3.4	1470	181	24.3	3.1	650	111	10.7
0500000US39117	39117	Morrow County, Ohio	12640	338	12640	(X)	9312	338	73.7	2.3	3696	341	29.2	2.4	7328	383	58	3	2580	323	20.4	2.4	758	191	6	1.5	423	163	3.3	1.3	1226	225	9.7	1.7	693	181	5.5	1.4	3328	316	26.3	2.3	2708	277	21.4	2	1255	193	9.9
0500000US39119	39119	Muskingum County, Ohio	34160	469	34160	(X)	22872	538	67	1.3	9665	454	28.3	1.2	16419	567	48.1	1.5	5687	406	16.6	1.1	1740	224	5.1	0.7	974	179	2.9	0.5	4713	389	13.8	1.1	3004	328	8.8	1	11288	483	33	1.3	9387	480	27.5	1.3	3871	296	11.3
0500000US39121	39121	Noble County, Ohio	4916	204	4916	(X)	3379	236	68.7	3.5	736	131	15	2.6	2858	216	58.1	3.4	522	120	10.6	2.4	134	62	2.7	1.2	40	27	0.8	0.5	387	92	7.9	1.9	174	61	3.5	1.2	1537	177	31.3	3.5	1419	181	28.9	3.6	747	144	15.2
0500000US39123	39123	Ottawa County, Ohio	17366	354	17366	(X)	12091	337	69.6	1.6	4150	254	23.9	1.3	9792	349	56.4	1.8	2905	229	16.7	1.2	765	163	4.4	0.9	431	133	2.5	0.8	1534	202	8.8	1.2	814	155	4.7	0.9	5275	309	30.4	1.6	4531	284	26.1	1.5	2226	205	12.8
0500000US39125	39125	Paulding County, Ohio	7798	196	7798	(X)	5461	201	70	2.4	2176	162	27.9	1.8	4491	197	57.6	2.8	1626	135	20.9	1.7	373	98	4.8	1.3	221	87	2.8	1.1	597	128	7.7	1.6	329	101	4.2	1.2	2337	210	30	2.4	1988	193	25.5	2.4	983	111	12.6
0500000US39127	39127	Perry County, Ohio	13637	274	13637	(X)	9902	422	72.6	2.7	3959	259	29	1.7	7661	430	56.2	2.9	2733	261	20	1.9	660	160	4.8	1.2	366	117	2.7	0.9	1581	205	11.6	1.5	860	150	6.3	1.1	3735	378	27.4	2.7	3237	368	23.7	2.7	1157	179	8.5
0500000US39129	39129	Pickaway County, Ohio	19435	346	19435	(X)	14115	442	72.6	1.8	5887	281	30.3	1.3	11122	519	57.2	2.4	4093	299	21.1	1.5	853	199	4.4	1	591	183	3	0.9	2140	260	11	1.3	1203	208	6.2	1.1	5320	364	27.4	1.8	4484	357	23.1	1.8	2045	268	10.5
0500000US39131	39131	Pike County, Ohio	10944	300	10944	(X)	7355	375	67.2	2.7	2992	278	27.3	2.3	4984	354	45.5	3.2	1808	246	16.5	2.2	814	168	7.4	1.5	373	101	3.4	0.9	1557	249	14.2	2.2	811	177	7.4	1.6	3589	304	32.8	2.7	3037	263	27.8	2.3	1260	193	11.5
0500000US39133	39133	Portage County, Ohio	61042	721	61042	(X)	39892	716	65.4	1	16069	512	26.3	0.8	30419	843	49.8	1.4	10926	522	17.9	0.9	2386	358	3.9	0.6	998	222	1.6	0.4	7087	563	11.6	0.9	4145	451	6.8	0.7	21150	732	34.6	1	15974	685	26.2	1	5398	381	8.8
0500000US39135	39135	Preble County, Ohio	16151	252	16151	(X)	11547	316	71.5	1.8	4605	196	28.5	1.1	9030	348	55.9	2.1	3279	238	20.3	1.5	647	121	4	0.7	346	100	2.1	0.6	1870	232	11.6	1.4	980	176	6.1	1.1	4604	310	28.5	1.8	3901	301	24.2	1.8	1707	185	10.6
0500000US39137	39137	Putnam County, Ohio	13006	159	13006	(X)	9610	245	73.9	1.9	4099	200	31.5	1.5	8304	245	63.8	1.9	3426	195	26.3	1.4	454	114	3.5	0.9	232	86	1.8	0.7	852	155	6.6	1.2	441	105	3.4	0.8	3396	263	26.1	1.9	2921	235	22.5	1.7	1577	166	12.1
0500000US39139	39139	Richland County, Ohio	48211	540	48211	(X)	30971	649	64.2	1.2	12307	527	25.5	1	23198	531	48.1	1	7686	449	15.9	0.9	1894	296	3.9	0.6	1070	241	2.2	0.5	5879	477	12.2	1	3551	404	7.4	0.8	17240	652	35.8	1.2	15060	621	31.2	1.2	6843	401	14.2
0500000US39141	39141	Ross County, Ohio	28209	460	28209	(X)	19424	493	68.9	1.5	7990	402	28.3	1.4	14452	507	51.2	1.8	5173	366	18.3	1.3	1157	238	4.1	0.8	494	154	1.8	0.5	3815	344	13.5	1.2	2323	270	8.2	0.9	8785	479	31.1	1.5	7372	451	26.1	1.5	3086	266	10.9
0500000US39143	39143	Sandusky County, Ohio	23831	349	23831	(X)	16180	357	67.9	1.5	6420	352	26.9	1.4	12023	427	50.5	1.8	4044	316	17	1.3	1286	207	5.4	0.9	737	177	3.1	0.7	2871	280	12	1.2	1639	240	6.9	1	7651	406	32.1	1.5	6507	415	27.3	1.6	2870	236	12
0500000US39145	39145	Scioto County, Ohio	29558	498	29558	(X)	18850	525	63.8	1.6	7407	441	25.1	1.4	14222	469	48.1	1.7	4763	340	16.1	1.1	1397	245	4.7	0.8	935	214	3.2	0.7	3231	380	10.9	1.2	1709	295	5.8	1	10708	535	36.2	1.6	8910	516	30.1	1.6	3773	296	12.8
0500000US39147	39147	Seneca County, Ohio	21539	390	21539	(X)	14747	400	68.5	1.7	5959	261	27.7	1.1	11064	341	51.4	1.6	3696	228	17.2	1.1	1085	211	5	1	576	128	2.7	0.6	2598	258	12.1	1.2	1687	205	7.8	0.9	6792	404	31.5	1.7	5619	382	26.1	1.6	2572	204	11.9
0500000US39149	39149	Shelby County, Ohio	18616	326	18616	(X)	13504	369	72.5	2	5860	284	31.5	1.6	10756	345	57.8	1.9	4119	234	22.1	1.3	970	202	5.2	1.1	608	167	3.3	0.9	1778	228	9.6	1.2	1133	212	6.1	1.1	5112	407	27.5	2	4177	359	22.4	1.8	1631	184	8.8
0500000US39151	39151	Stark County, Ohio	149756	1055	149756	(X)	99047	1167	66.1	0.8	39829	862	26.6	0.5	73234	1182	48.9	0.8	25303	779	16.9	0.5	7226	508	4.8	0.3	4013	409	2.7	0.3	18587	735	12.4	0.5	10513	616	7	0.4	50709	1302	33.9	0.8	42968	1220	28.7	0.7	17130	699	11.4
0500000US39153	39153	Summit County, Ohio	220710	1265	220710	(X)	138460	1192	62.7	0.6	58038	937	26.3	0.4	100269	1077	45.4	0.5	37518	778	17	0.4	9259	531	4.2	0.2	3912	399	1.8	0.2	28932	1036	13.1	0.5	16608	764	7.5	0.3	82250	1493	37.3	0.6	69513	1341	31.5	0.5	25557	869	11.6
0500000US39155	39155	Trumbull County, Ohio	86565	801	86565	(X)	55763	747	64.4	0.9	21223	743	24.5	0.8	39776	792	45.9	1	12655	567	14.6	0.7	4341	468	5	0.5	1839	312	2.1	0.4	11646	667	13.5	0.7	6729	600	7.8	0.7	30802	900	35.6	0.9	26987	899	31.2	0.9	11648	609	13.5
0500000US39157	39157	Tuscarawas County, Ohio	36366	497	36366	(X)	25342	533	69.7	1.2	10030	413	27.6	1	19893	547	54.7	1.3	6937	382	19.1	1	1519	257	4.2	0.7	776	202	2.1	0.6	3930	391	10.8	1.1	2317	342	6.4	0.9	11024	492	30.3	1.2	9481	445	26.1	1.2	4500	339	12.4
0500000US39159	39159	Union County, Ohio	18291	295	18291	(X)	13727	369	75	1.9	6939	294	37.9	1.6	11275	394	61.6	2.2	5392	279	29.5	1.6	770	178	4.2	1	467	139	2.6	0.8	1682	281	9.2	1.5	1080	232	5.9	1.2	4564	374	25	1.9	3852	352	21.1	1.9	1278	205	7
0500000US39161	39161	Van Wert County, Ohio	11388	222	11388	(X)	7868	249	69.1	2.1	2991	181	26.3	1.6	6306	272	55.4	2.3	2210	189	19.4	1.7	494	121	4.3	1.1	225	85	2	0.7	1068	158	9.4	1.4	556	113	4.9	1	3520	273	30.9	2.1	3085	243	27.1	2	1403	163	12.3
0500000US39163	39163	Vinton County, Ohio	5137	221	5137	(X)	3630	223	70.7	3.3	1443	186	28.1	3	2771	245	53.9	4.1	904	166	17.6	2.9	252	92	4.9	1.7	186	83	3.6	1.6	607	127	11.8	2.5	353	103	6.9	2	1507	184	29.3	3.3	1273	160	24.8	3	618	109	12
0500000US39165	39165	Warren County, Ohio	77328	735	77328	(X)	58674	802	75.9	1	27756	593	35.9	0.7	49263	918	63.7	1.1	22206	651	28.7	0.8	2997	415	3.9	0.5	1650	309	2.1	0.4	6414	544	8.3	0.7	3900	399	5	0.5	18654	802	24.1	1	15258	707	19.7	0.8	5664	478	7.3
0500000US39167	39167	Washington County, Ohio	24923	424	24923	(X)	16307	460	65.4	1.6	5701	381	22.9	1.4	13109	463	52.6	1.7	4163	308	16.7	1.2	824	159	3.3	0.6	394	112	1.6	0.4	2374	286	9.5	1.2	1144	204	4.6	0.8	8616	439	34.6	1.6	7423	419	29.8	1.6	2982	281	12
0500000US39169	39169	Wayne County, Ohio	42593	461	42593	(X)	30321	489	71.2	0.9	12210	418	28.7	0.9	24549	544	57.6	1.2	9259	396	21.7	0.9	1737	227	4.1	0.5	710	163	1.7	0.4	4035	332	9.5	0.8	2241	272	5.3	0.6	12272	432	28.8	0.9	10663	447	25	1	4318	308	10.1
0500000US39171	39171	Williams County, Ohio	15001	269	15001	(X)	9873	327	65.8	2	4038	212	26.9	1.4	7586	301	50.6	1.9	2675	195	17.8	1.3	731	147	4.9	1	450	115	3	0.8	1556	232	10.4	1.5	913	179	6.1	1.2	5128	325	34.2	2	4323	321	28.8	2	1819	166	12.1
0500000US39173	39173	Wood County, Ohio	49561	546	49561	(X)	30995	678	62.5	1.3	13403	498	27	1	24634	610	49.7	1.2	9431	402	19	0.8	1827	237	3.7	0.5	1255	224	2.5	0.4	4534	360	9.1	0.7	2717	336	5.5	0.7	18566	739	37.5	1.3	14116	736	28.5	1.4	4680	366	9.4
0500000US39175	39175	Wyandot County, Ohio	9327	159	9327	(X)	6201	257	66.5	2.6	2578	180	27.6	1.8	5019	223	53.8	2.4	1914	151	20.5	1.5	372	107	4	1.1	164	69	1.8	0.7	810	151	8.7	1.6	500	125	5.4	1.3	3126	252	33.5	2.6	2516	251	27	2.6	1118	161	12
0500000US42001	42001	Adams County, Pennsylvania	37956	426	37956	(X)	27152	430	71.5	1.1	10395	386	27.4	0.9	21925	453	57.8	1.2	7577	353	20	0.9	1607	225	4.2	0.6	761	161	2	0.4	3620	367	9.5	1	2057	265	5.4	0.7	10804	482	28.5	1.1	8928	434	23.5	1	4062	272	10.7
0500000US42003	42003	Allegheny County, Pennsylvania	527445	2332	527445	(X)	305060	2297	57.8	0.4	122640	1428	23.3	0.2	223875	2151	42.4	0.4	82533	1313	15.6	0.2	18952	895	3.6	0.2	8082	538	1.5	0.1	62233	1375	11.8	0.3	32025	1040	6.1	0.2	222385	2125	42.2	0.4	186312	2150	35.3	0.4	70697	1299	13.4
0500000US42005	42005	Armstrong County, Pennsylvania	28616	372	28616	(X)	19366	395	67.7	1.1	6822	263	23.8	0.8	14952	374	52.3	1.3	4526	249	15.8	0.9	1580	199	5.5	0.7	782	161	2.7	0.6	2834	251	9.9	0.9	1514	161	5.3	0.5	9250	325	32.3	1.1	8097	287	28.3	1	4193	242	14.7
0500000US42007	42007	Beaver County, Pennsylvania	70336	571	70336	(X)	46200	600	65.7	0.9	16177	502	23	0.7	34948	609	49.7	0.9	10719	385	15.2	0.5	3102	328	4.4	0.5	1268	204	1.8	0.3	8150	439	11.6	0.6	4190	342	6	0.5	24136	701	34.3	0.9	21094	597	30	0.8	9979	468	14.2
0500000US42009	42009	Bedford County, Pennsylvania	20145	299	20145	(X)	14075	310	69.9	1.4	4899	212	24.3	1	11043	256	54.8	1.4	3356	156	16.7	0.8	1128	167	5.6	0.8	577	136	2.9	0.7	1904	203	9.5	1	966	145	4.8	0.7	6070	310	30.1	1.4	5386	313	26.7	1.4	2775	213	13.8
0500000US42011	42011	Berks County, Pennsylvania	153857	825	153857	(X)	106392	1138	69.1	0.7	45802	1030	29.8	0.6	79405	1046	51.6	0.7	29973	943	19.5	0.6	8077	590	5.2	0.4	4390	452	2.9	0.3	18910	820	12.3	0.5	11439	756	7.4	0.5	47465	1149	30.9	0.7	38014	1048	24.7	0.6	16621	616	10.8
0500000US42013	42013	Blair County, Pennsylvania	50948	526	50948	(X)	32863	553	64.5	1.1	12547	378	24.6	0.7	24768	546	48.6	1.1	8384	368	16.5	0.7	2279	331	4.5	0.7	1164	219	2.3	0.4	5816	444	11.4	0.9	2999	303	5.9	0.6	18085	644	35.5	1.1	15487	664	30.4	1.2	7094	481	13.9
0500000US42015	42015	Bradford County, Pennsylvania	24338	329	24338	(X)	16646	336	68.4	1.3	5994	266	24.6	1	13114	312	53.9	1.3	4085	245	16.8	1	1220	155	5	0.6	633	120	2.6	0.5	2312	204	9.5	0.8	1276	158	5.2	0.6	7692	369	31.6	1.3	6451	357	26.5	1.3	2922	224	12
0500000US42017	42017	Bucks County, Pennsylvania	231959	1026	231959	(X)	165939	1363	71.5	0.5	67377	1307	29	0.5	135257	1380	58.3	0.5	53646	1121	23.1	0.5	8764	621	3.8	0.3	3546	422	1.5	0.2	21918	971	9.4	0.4	10185	763	4.4	0.3	66020	1266	28.5	0.5	55715	1104	24	0.5	23446	822	10.1
0500000US42019	42019	Butler County, Pennsylvania	74138	519	74138	(X)	50332	705	67.9	0.9	20690	488	27.9	0.6	41387	722	55.8	0.9	16063	477	21.7	0.6	2676	287	3.6	0.4	1230	221	1.7	0.3	6269	360	8.5	0.5	3397	303	4.6	0.4	23806	739	32.1	0.9	19623	724	26.5	0.9	8139	464	11
0500000US42021	42021	Cambria County, Pennsylvania	57959	559	57959	(X)	37063	560	63.9	1	13480	472	23.3	0.8	27937	536	48.2	1	8805	324	15.2	0.5	2565	235	4.4	0.4	1219	211	2.1	0.4	6561	361	11.3	0.6	3456	287	6	0.5	20896	644	36.1	1	18373	638	31.7	1	8722	434	15
0500000US42023	42023	Cameron County, Pennsylvania	2214	99	2214	(X)	1386	90	62.6	3.8	475	72	21.5	2.9	1052	84	47.5	4	248	48	11.2	2.1	132	34	6	1.6	80	35	3.6	1.5	202	51	9.1	2.1	147	49	6.6	2.1	828	101	37.4	3.8	731	97	33	3.8	354	62	16
0500000US42025	42025	Carbon County, Pennsylvania	25764	547	25764	(X)	17551	511	68.1	1.6	6328	320	24.6	1.2	13567	465	52.7	1.7	4024	287	15.6	1.1	1118	232	4.3	0.9	584	158	2.3	0.6	2866	379	11.1	1.4	1720	280	6.7	1.1	8213	462	31.9	1.6	6620	467	25.7	1.7	3191	347	12.4
0500000US42027	42027	Centre County, Pennsylvania	57283	816	57283	(X)	32448	757	56.6	1.2	12867	505	22.5	0.8	26421	825	46.1	1.3	9884	470	17.3	0.8	2313	332	4	0.6	976	262	1.7	0.5	3714	396	6.5	0.7	2007	345	3.5	0.6	24835	803	43.4	1.2	16424	779	28.7	1.3	5150	402	9
0500000US42029	42029	Chester County, Pennsylvania	185306	768	185306	(X)	129876	1038	70.1	0.6	60056	791	32.4	0.4	108255	1194	58.4	0.7	49205	801	26.6	0.4	6000	485	3.2	0.3	2983	364	1.6	0.2	15621	688	8.4	0.4	7868	481	4.2	0.3	55430	1230	29.9	0.6	44264	1104	23.9	0.6	17308	661	9.3
0500000US42031	42031	Clarion County, Pennsylvania	15846	254	15846	(X)	9901	275	62.5	1.8	3744	221	23.6	1.3	7906	223	49.9	1.5	2629	143	16.6	0.9	710	142	4.5	0.9	416	122	2.6	0.8	1285	160	8.1	1	699	142	4.4	0.9	5945	335	37.5	1.8	4475	322	28.2	1.9	1914	149	12.1
0500000US42033	42033	Clearfield County, Pennsylvania	31863	492	31863	(X)	21163	470	66.4	1.2	8027	375	25.2	1	16766	462	52.6	1.3	5698	288	17.9	0.8	1528	255	4.8	0.8	779	235	2.4	0.7	2869	288	9	0.9	1550	231	4.9	0.7	10700	425	33.6	1.2	9440	449	29.6	1.3	4308	275	13.5
0500000US42035	42035	Clinton County, Pennsylvania	14947	365	14947	(X)	9849	287	65.9	1.7	3790	185	25.4	1.2	7609	268	50.9	1.6	2513	158	16.8	1	704	135	4.7	0.9	428	108	2.9	0.7	1536	165	10.3	1.2	849	116	5.7	0.8	5098	323	34.1	1.7	3961	259	26.5	1.5	1878	159	12.6
0500000US42037	42037	Columbia County, Pennsylvania	26413	458	26413	(X)	16852	467	63.8	1.5	6408	344	24.3	1.1	13174	407	49.9	1.4	4310	269	16.3	0.9	1099	158	4.2	0.6	600	127	2.3	0.5	2579	284	9.8	1.1	1498	212	5.7	0.8	9561	461	36.2	1.5	7029	392	26.6	1.4	3395	215	12.9
0500000US42039	42039	Crawford County, Pennsylvania	34713	439	34713	(X)	23141	440	66.7	1.4	8769	339	25.3	1	17955	454	51.7	1.4	5745	315	16.5	0.9	1584	186	4.6	0.5	955	158	2.8	0.5	3602	266	10.4	0.8	2069	231	6	0.7	11572	560	33.3	1.4	9588	484	27.6	1.2	4174	301	12
0500000US42041	42041	Cumberland County, Pennsylvania	95835	762	95835	(X)	61739	876	64.4	0.9	24979	716	26.1	0.7	49882	853	52	0.8	18273	653	19.1	0.6	3619	356	3.8	0.4	2023	313	2.1	0.3	8238	518	8.6	0.5	4683	426	4.9	0.4	34096	1007	35.6	0.9	28372	933	29.6	0.9	11069	454	11.6
0500000US42043	42043	Dauphin County, Pennsylvania	109027	831	109027	(X)	68644	988	63	0.8	29563	807	27.1	0.7	48527	856	44.5	0.8	18064	616	16.6	0.6	5210	543	4.8	0.5	2744	447	2.5	0.4	14907	681	13.7	0.6	8755	634	8	0.6	40383	947	37	0.8	33476	931	30.7	0.8	11772	571	10.8
0500000US42045	42045	Delaware County, Pennsylvania	204571	1006	204571	(X)	136754	1220	66.8	0.6	59677	1114	29.2	0.5	97854	1391	47.8	0.6	40666	1029	19.9	0.5	9718	648	4.8	0.3	4368	459	2.1	0.2	29182	957	14.3	0.5	14643	754	7.2	0.4	67817	1223	33.2	0.6	58397	1320	28.5	0.6	23928	799	11.7
0500000US42047	42047	Elk County, Pennsylvania	13375	298	13375	(X)	8830	285	66	2.2	3191	196	23.9	1.4	6749	302	50.5	2.3	2137	187	16	1.4	740	168	5.5	1.3	400	125	3	0.9	1341	199	10	1.5	654	119	4.9	0.9	4545	355	34	2.2	4153	341	31.1	2.2	1926	223	14.4
0500000US42049	42049	Erie County, Pennsylvania	109700	776	109700	(X)	69296	884	63.2	0.8	28498	782	26	0.7	50375	963	45.9	0.9	17501	698	16	0.6	4865	364	4.4	0.3	2537	284	2.3	0.3	14056	657	12.8	0.6	8460	542	7.7	0.5	40404	952	36.8	0.8	33381	1002	30.4	0.9	12362	516	11.3
0500000US42051	42051	Fayette County, Pennsylvania	53987	639	53987	(X)	34400	631	63.7	1.1	12542	509	23.2	0.9	25229	587	46.7	1.1	8055	453	14.9	0.8	2739	333	5.1	0.6	1358	210	2.5	0.4	6432	374	11.9	0.7	3129	319	5.8	0.6	19587	698	36.3	1.1	17035	686	31.6	1.1	7775	453	14.4
0500000US42053	42053	Forest County, Pennsylvania	2075	257	2075	(X)	1247	152	60.1	3.5	202	73	9.7	2.6	1054	119	50.8	3.9	121	51	5.8	2	29	26	1.4	1.1	3	14	0.1	0.6	164	48	7.9	2	78	34	3.8	1.5	828	141	39.9	3.5	724	105	34.9	3.1	410	57	19.8
0500000US42055	42055	Franklin County, Pennsylvania	58298	577	58298	(X)	40113	732	68.8	1.2	16238	620	27.9	1	32052	680	55	1.1	11498	510	19.7	0.8	2675	357	4.6	0.6	1449	268	2.5	0.5	5386	425	9.2	0.7	3291	358	5.6	0.6	18185	794	31.2	1.2	15490	802	26.6	1.3	6685	465	11.5
0500000US42057	42057	Fulton County, Pennsylvania	5981	110	5981	(X)	4214	121	70.5	1.7	1550	88	25.9	1.3	3386	115	56.6	2	1117	73	18.7	1.2	340	66	5.7	1.1	212	57	3.5	0.9	488	73	8.2	1.2	221	48	3.7	0.8	1767	113	29.5	1.7	1456	103	24.3	1.6	685	63	11.5
0500000US42059	42059	Greene County, Pennsylvania	14383	361	14383	(X)	9530	363	66.3	2.1	3513	246	24.4	1.5	7214	343	50.2	2.2	2389	205	16.6	1.3	682	156	4.7	1.1	306	105	2.1	0.7	1634	176	11.4	1.2	818	170	5.7	1.2	4853	347	33.7	2.1	3979	311	27.7	1.9	1890	194	13.1
0500000US42061	42061	Huntingdon County, Pennsylvania	17231	298	17231	(X)	11673	348	67.7	1.6	4465	231	25.9	1.2	9517	293	55.2	1.5	3238	198	18.8	1.1	723	124	4.2	0.7	453	110	2.6	0.6	1433	205	8.3	1.2	774	159	4.5	0.9	5558	288	32.3	1.6	4890	276	28.4	1.5	2358	161	13.7
0500000US42063	42063	Indiana County, Pennsylvania	34398	487	34398	(X)	21672	405	63	1.3	7802	330	22.7	0.9	17654	410	51.3	1.2	5889	308	17.1	0.8	1234	202	3.6	0.6	566	108	1.6	0.3	2784	296	8.1	0.9	1347	230	3.9	0.7	12726	540	37	1.3	9720	545	28.3	1.4	3746	318	10.9
0500000US42065	42065	Jefferson County, Pennsylvania	18583	225	18583	(X)	12272	228	66	1.2	4606	206	24.8	1	9667	251	52	1.3	3123	177	16.8	0.9	801	111	4.3	0.6	359	82	1.9	0.4	1804	163	9.7	0.9	1124	127	6	0.7	6311	255	34	1.2	5535	246	29.8	1.2	2613	160	14.1
0500000US42067	42067	Juniata County, Pennsylvania	9329	176	9329	(X)	6620	223	71	2.1	2335	169	25	1.7	5541	192	59.4	1.9	1812	153	19.4	1.6	342	66	3.7	0.7	151	49	1.6	0.5	737	118	7.9	1.2	372	64	4	0.7	2709	206	29	2.1	2259	170	24.2	1.7	1107	117	11.9
0500000US42069	42069	Lackawanna County, Pennsylvania	85335	762	85335	(X)	53406	853	62.6	0.9	21009	688	24.6	0.8	39214	849	46	0.9	14012	615	16.4	0.7	4006	369	4.7	0.4	1790	277	2.1	0.3	10186	586	11.9	0.7	5207	470	6.1	0.5	31929	896	37.4	0.9	27234	802	31.9	0.9	12122	552	14.2
0500000US42071	42071	Lancaster County, Pennsylvania	194503	859	194503	(X)	136731	1291	70.3	0.6	57058	954	29.3	0.5	112011	1528	57.6	0.8	43211	912	22.2	0.5	6906	587	3.6	0.3	3492	398	1.8	0.2	17814	785	9.2	0.4	10355	711	5.3	0.4	57772	1294	29.7	0.6	46788	1110	24.1	0.6	20348	745	10.5
0500000US42073	42073	Lawrence County, Pennsylvania	36616	407	36616	(X)	24446	450	66.8	1.2	9215	328	25.2	0.9	18467	501	50.4	1.3	5944	311	16.2	0.8	1582	229	4.3	0.6	726	162	2	0.4	4397	318	12	0.9	2545	263	7	0.7	12170	500	33.2	1.2	10729	476	29.3	1.2	5061	326	13.8
0500000US42075	42075	Lebanon County, Pennsylvania	51793	519	51793	(X)	36302	719	70.1	1.2	14943	600	28.9	1.1	28068	648	54.2	1.2	10174	482	19.6	0.9	2567	337	5	0.7	1267	206	2.4	0.4	5667	483	10.9	0.9	3502	401	6.8	0.8	15491	660	29.9	1.2	13258	624	25.6	1.2	5965	376	11.5
0500000US42077	42077	Lehigh County, Pennsylvania	133684	795	133684	(X)	89467	1183	66.9	0.8	39313	983	29.4	0.7	65783	1020	49.2	0.7	26183	796	19.6	0.6	6021	518	4.5	0.4	2817	369	2.1	0.3	17663	886	13.2	0.7	10313	642	7.7	0.5	44217	1040	33.1	0.8	36462	1051	27.3	0.8	14591	599	10.9
0500000US42079	42079	Luzerne County, Pennsylvania	129335	1078	129335	(X)	82250	938	63.6	0.6	31605	783	24.4	0.5	57765	854	44.7	0.7	18994	724	14.7	0.5	7032	483	5.4	0.4	2917	372	2.3	0.3	17453	657	13.5	0.5	9694	541	7.5	0.4	47085	948	36.4	0.6	40735	882	31.5	0.6	18641	645	14.4
0500000US42081	42081	Lycoming County, Pennsylvania	46008	506	46008	(X)	29845	546	64.9	1.1	11581	431	25.2	0.9	22608	544	49.1	1.1	7457	357	16.2	0.8	2156	292	4.7	0.6	1137	191	2.5	0.4	5081	381	11	0.8	2987	360	6.5	0.8	16163	586	35.1	1.1	13169	604	28.6	1.2	5482	398	11.9
0500000US42083	42083	McKean County, Pennsylvania	17340	300	17340	(X)	11190	289	64.5	1.4	4433	220	25.6	1.2	7964	264	45.9	1.4	2547	176	14.7	1	1029	173	5.9	1	619	141	3.6	0.8	2197	174	12.7	1	1267	143	7.3	0.8	6150	281	35.5	1.4	5198	274	30	1.4	2264	164	13.1
0500000US42085	42085	Mercer County, Pennsylvania	46128	520	46128	(X)	30529	584	66.2	1.2	11591	394	25.1	0.8	22999	573	49.9	1.3	7603	332	16.5	0.7	1738	225	3.8	0.5	953	197	2.1	0.4	5792	362	12.6	0.8	3035	276	6.6	0.6	15599	605	33.8	1.2	13796	585	29.9	1.2	6419	391	13.9
0500000US42087	42087	Mifflin County, Pennsylvania	18822	343	18822	(X)	12531	350	66.6	1.8	4803	300	25.5	1.5	9686	337	51.5	1.9	3240	249	17.2	1.3	780	181	4.1	0.9	465	161	2.5	0.8	2065	229	11	1.2	1098	168	5.8	0.9	6291	398	33.4	1.8	5132	364	27.3	1.7	2501	265	13.3
0500000US42089	42089	Monroe County, Pennsylvania	57661	1040	57661	(X)	42252	994	73.3	1.2	17734	861	30.8	1.3	31875	1092	55.3	1.6	12047	764	20.9	1.2	2914	434	5.1	0.8	1598	319	2.8	0.6	7463	665	12.9	1.1	4089	454	7.1	0.8	15409	778	26.7	1.2	11920	717	20.7	1.2	4642	470	8.1
0500000US42091	42091	Montgomery County, Pennsylvania	307953	1342	307953	(X)	210447	1492	68.3	0.4	92972	1328	30.2	0.4	170401	1526	55.3	0.5	73042	1237	23.7	0.4	11132	702	3.6	0.2	5097	479	1.7	0.2	28914	1042	9.4	0.3	14833	738	4.8	0.2	97506	1526	31.7	0.4	81745	1436	26.5	0.4	34248	977	11.1
0500000US42093	42093	Montour County, Pennsylvania	7380	201	7380	(X)	4710	189	63.8	2.7	1783	159	24.2	2.3	3748	172	50.8	2.5	1313	134	17.8	1.9	279	91	3.8	1.2	191	84	2.6	1.1	683	136	9.3	1.8	279	85	3.8	1.2	2670	243	36.2	2.7	2302	244	31.2	2.9	992	150	13.4
0500000US42095	42095	Northampton County, Pennsylvania	112790	762	112790	(X)	78103	994	69.2	0.8	31760	846	28.2	0.7	60470	1009	53.6	0.8	22639	730	20.1	0.6	5104	473	4.5	0.4	2460	335	2.2	0.3	12529	633	11.1	0.6	6661	508	5.9	0.4	34687	973	30.8	0.8	28261	873	25.1	0.7	12930	567	11.5
0500000US42097	42097	Northumberland County, Pennsylvania	39170	449	39170	(X)	25215	560	64.4	1.3	9091	374	23.2	0.9	19308	529	49.3	1.3	6167	342	15.7	0.8	1658	202	4.2	0.5	678	136	1.7	0.4	4249	369	10.8	0.9	2246	290	5.7	0.7	13955	526	35.6	1.3	11877	517	30.3	1.3	5167	271	13.2
0500000US42099	42099	Perry County, Pennsylvania	18077	239	18077	(X)	12745	297	70.5	1.4	5009	216	27.7	1.1	10272	282	56.8	1.4	3504	215	19.4	1.1	703	105	3.9	0.6	311	77	1.7	0.4	1770	173	9.8	0.9	1194	167	6.6	0.9	5332	258	29.5	1.4	4222	229	23.4	1.2	1740	133	9.6
0500000US42101	42101	Philadelphia County, Pennsylvania	580297	2587	580297	(X)	308324	2826	53.1	0.5	132416	2050	22.8	0.3	158216	2328	27.3	0.4	59255	1600	10.2	0.3	30832	1280	5.3	0.2	12355	902	2.1	0.2	119276	1962	20.6	0.3	60806	1458	10.5	0.2	271973	3225	46.9	0.5	229109	3018	39.5	0.5	67470	1450	11.6
0500000US42103	42103	Pike County, Pennsylvania	21183	646	21183	(X)	15256	656	72	2.1	5435	397	25.7	1.5	12447	565	58.8	2.2	4096	319	19.3	1.3	829	155	3.9	0.7	304	103	1.4	0.5	1980	281	9.3	1.3	1035	222	4.9	1	5927	485	28	2.1	5058	430	23.9	1.9	2198	274	10.4
0500000US42105	42105	Potter County, Pennsylvania	6848	177	6848	(X)	4576	157	66.8	1.4	1491	95	21.8	1.1	3672	133	53.6	1.6	1046	84	15.3	1.1	308	52	4.5	0.7	151	39	2.2	0.6	596	92	8.7	1.3	294	69	4.3	1	2272	110	33.2	1.4	1964	106	28.7	1.4	954	74	13.9
0500000US42107	42107	Schuylkill County, Pennsylvania	59122	698	59122	(X)	38599	602	65.3	1	14537	406	24.6	0.7	28587	597	48.4	1	9721	384	16.4	0.6	3211	317	5.4	0.5	1451	238	2.5	0.4	6801	534	11.5	0.9	3365	358	5.7	0.6	20523	728	34.7	1	17488	703	29.6	1	8174	413	13.8
0500000US42109	42109	Snyder County, Pennsylvania	14414	239	14414	(X)	10405	285	72.2	1.5	4071	221	28.2	1.4	8475	274	58.8	1.7	2912	189	20.2	1.2	749	134	5.2	0.9	497	110	3.4	0.8	1181	153	8.2	1	662	112	4.6	0.8	4009	226	27.8	1.5	3296	192	22.9	1.3	1720	134	11.9
0500000US42111	42111	Somerset County, Pennsylvania	29748	419	29748	(X)	20602	396	69.3	0.9	7212	273	24.2	0.8	16932	374	56.9	1.1	5452	268	18.3	0.8	1171	170	3.9	0.6	568	113	1.9	0.4	2499	224	8.4	0.7	1192	176	4	0.6	9146	310	30.7	0.9	8037	327	27	1	4152	243	14
0500000US42113	42113	Sullivan County, Pennsylvania	2476	137	2476	(X)	1571	113	63.4	3.1	447	68	18.1	2.4	1308	100	52.8	3.3	333	51	13.4	1.9	117	41	4.7	1.6	47	21	1.9	0.8	146	39	5.9	1.5	67	28	2.7	1.1	905	94	36.6	3.1	801	88	32.4	2.9	379	59	15.3
0500000US42115	42115	Susquehanna County, Pennsylvania	17265	218	17265	(X)	11695	238	67.7	1.2	4056	178	23.5	1	9289	252	53.8	1.3	2904	164	16.8	0.9	867	100	5	0.6	402	83	2.3	0.5	1539	122	8.9	0.7	750	99	4.3	0.6	5570	235	32.3	1.2	4655	241	27	1.3	1952	148	11.3
0500000US42117	42117	Tioga County, Pennsylvania	16802	286	16802	(X)	11429	272	68	1.3	4125	200	24.6	1	9066	278	54	1.5	2855	163	17	0.9	872	112	5.2	0.7	449	71	2.7	0.4	1491	141	8.9	0.8	821	115	4.9	0.7	5373	256	32	1.3	4377	246	26.1	1.3	2011	157	12
0500000US42119	42119	Union County, Pennsylvania	15058	355	15058	(X)	10318	377	68.5	2	4330	318	28.8	2	8202	345	54.5	2.2	2952	235	19.6	1.5	717	160	4.8	1	484	123	3.2	0.8	1399	287	9.3	1.9	894	262	5.9	1.7	4740	326	31.5	2	3689	293	24.5	1.9	1506	206	10
0500000US42121	42121	Venango County, Pennsylvania	22412	314	22412	(X)	15156	291	67.6	1.2	5630	223	25.1	0.9	11556	305	51.6	1.4	3505	203	15.6	0.9	1114	169	5	0.7	620	124	2.8	0.5	2486	215	11.1	0.9	1505	182	6.7	0.8	7256	312	32.4	1.2	6364	302	28.4	1.2	2816	210	12.6
0500000US42123	42123	Warren County, Pennsylvania	17029	305	17029	(X)	11097	263	65.2	1.4	3557	173	20.9	0.9	8956	281	52.6	1.5	2535	166	14.9	0.9	683	108	4	0.6	311	76	1.8	0.4	1458	155	8.6	0.9	711	110	4.2	0.6	5932	280	34.8	1.4	5164	279	30.3	1.4	2277	178	13.4
0500000US42125	42125	Washington County, Pennsylvania	83644	735	83644	(X)	55011	733	65.8	0.9	20773	526	24.8	0.6	43533	784	52	0.9	15214	516	18.2	0.6	2931	318	3.5	0.4	1335	235	1.6	0.3	8547	543	10.2	0.7	4224	426	5	0.5	28633	852	34.2	0.9	24240	783	29	0.8	10969	460	13.1
0500000US42127	42127	Wayne County, Pennsylvania	19362	485	19362	(X)	13210	445	68.2	1.5	4534	303	23.4	1.2	10650	428	55	1.7	3089	291	16	1.3	813	142	4.2	0.7	470	132	2.4	0.7	1747	238	9	1.2	975	186	5	1	6152	327	31.8	1.5	5305	317	27.4	1.5	2443	217	12.6
0500000US42129	42129	Westmoreland County, Pennsylvania	151489	927	151489	(X)	100830	1089	66.6	0.7	35892	711	23.7	0.4	78905	984	52.1	0.7	25188	597	16.6	0.4	5990	509	4	0.3	2434	348	1.6	0.2	15935	694	10.5	0.5	8270	486	5.5	0.3	50659	1126	33.4	0.7	44029	1128	29.1	0.7	20772	722	13.7
0500000US42131	42131	Wyoming County, Pennsylvania	10895	176	10895	(X)	7375	225	67.7	1.6	2677	148	24.6	1.3	5788	257	53.1	2.1	1870	142	17.2	1.3	544	91	5	0.8	258	58	2.4	0.5	1043	127	9.6	1.1	549	85	5	0.8	3520	181	32.3	1.6	2819	168	25.9	1.6	1229	113	11.3
0500000US42133	42133	York County, Pennsylvania	168278	834	168278	(X)	118057	1166	70.2	0.7	50009	923	29.7	0.5	91940	1229	54.6	0.7	34363	833	20.4	0.5	7695	640	4.6	0.4	4446	517	2.6	0.3	18422	744	10.9	0.4	11200	712	6.7	0.4	50221	1212	29.8	0.7	41342	989	24.6	0.6	17078	659	10.1
0500000US51001	51001	Accomack County, Virginia	14289	610	14289	(X)	9346	587	65.4	2.9	3060	350	21.4	2.1	6768	467	47.4	2.8	1809	240	12.7	1.6	629	153	4.4	1	234	113	1.6	0.8	1949	231	13.6	1.5	1017	214	7.1	1.4	4943	451	34.6	2.9	4200	477	29.4	3.3	1866	270	13.1
0500000US51003	51003	Albemarle County, Virginia	38537	669	38537	(X)	24670	601	64	1.5	10494	476	27.2	1.2	20454	588	53.1	1.5	8256	400	21.4	1.1	892	250	2.3	0.6	480	174	1.2	0.5	3324	411	8.6	1.1	1758	314	4.6	0.8	13867	692	36	1.5	11353	621	29.5	1.5	4072	340	10.6
0500000US51005	51005	Alleghany County, Virginia	6714	216	6714	(X)	4374	260	65.1	3.3	1407	147	21	2	3485	209	51.9	3.2	1043	122	15.5	1.9	328	94	4.9	1.4	128	56	1.9	0.8	561	146	8.4	2.1	236	97	3.5	1.4	2340	235	34.9	3.3	2015	218	30	3.1	1130	146	16.8
0500000US51007	51007	Amelia County, Virginia	4761	203	4761	(X)	3522	276	74	4.8	1215	194	25.5	3.9	2894	289	60.8	5.4	933	213	19.6	4.4	147	94	3.1	2	83	71	1.7	1.5	481	157	10.1	3.3	199	94	4.2	2	1239	235	26	4.8	1027	219	21.6	4.5	404	121	8.5
0500000US51009	51009	Amherst County, Virginia	12577	281	12577	(X)	8459	312	67.3	2.3	3057	248	24.3	1.9	6235	347	49.6	2.6	1931	195	15.4	1.6	456	137	3.6	1.1	250	112	2	0.9	1768	274	14.1	2.2	876	194	7	1.5	4118	314	32.7	2.3	3605	299	28.7	2.2	1492	207	11.9
0500000US51011	51011	Appomattox County, Virginia	5964	217	5964	(X)	4497	231	75.4	3.1	1739	216	29.2	3.2	3386	244	56.8	3.7	1180	216	19.8	3.4	352	100	5.9	1.6	137	71	2.3	1.2	759	145	12.7	2.4	422	118	7.1	1.9	1467	196	24.6	3.1	1289	201	21.6	3.2	729	129	12.2
0500000US51013	51013	Arlington County, Virginia	96264	1133	96264	(X)	44558	911	46.3	0.9	18999	757	19.7	0.8	35482	883	36.9	0.9	14968	680	15.5	0.7	3149	440	3.3	0.5	965	211	1	0.2	5927	467	6.2	0.5	3066	339	3.2	0.4	51706	1155	53.7	0.9	38581	1076	40.1	1	6633	402	6.9
0500000US51015	51015	Augusta County, Virginia	28124	502	28124	(X)	20654	564	73.4	1.8	7403	396	26.3	1.2	16825	618	59.8	2.1	5561	383	19.8	1.2	1214	232	4.3	0.8	530	161	1.9	0.6	2615	302	9.3	1.1	1312	227	4.7	0.8	7470	553	26.6	1.8	6426	501	22.8	1.7	2752	289	9.8
0500000US51017	51017	Bath County, Virginia	2225	158	2225	(X)	1343	148	60.4	8.1	504	135	22.7	6.5	1136	189	51.1	9.6	350	160	15.7	7.4	78	80	3.5	3.6	69	86	3.1	3.8	129	98	5.8	4.4	85	81	3.8	3.7	882	225	39.6	8.1	793	216	35.6	7.8	351	142	15.8
0500000US51019	51019	Bedford County, Virginia	30122	535	30122	(X)	21338	585	70.8	1.8	7757	415	25.8	1.3	17539	630	58.2	2.1	5648	411	18.8	1.4	1109	236	3.7	0.8	538	175	1.8	0.6	2690	344	8.9	1.1	1571	284	5.2	0.9	8784	609	29.2	1.8	7449	517	24.7	1.6	3231	357	10.7
0500000US51021	51021	Bland County, Virginia	2591	198	2591	(X)	1775	161	68.5	4.6	661	114	25.5	3.6	1387	157	53.5	4.9	516	112	19.9	3.6	104	52	4	2	16	17	0.6	0.7	284	94	11	3.6	129	74	5	2.8	816	147	31.5	4.6	751	140	29	4.8	360	90	13.9
0500000US51023	51023	Botetourt County, Virginia	12867	233	12867	(X)	10041	344	78	2.3	3323	266	25.8	2	8637	379	67.1	2.8	2791	222	21.7	1.7	373	154	2.9	1.2	113	52	0.9	0.4	1031	215	8	1.7	419	126	3.3	1	2826	302	22	2.3	2388	279	18.6	2.1	1139	175	8.9
0500000US51025	51025	Brunswick County, Virginia	5865	347	5865	(X)	3999	326	68.2	4.1	1256	202	21.4	3.1	2636	308	44.9	4.5	724	163	12.3	2.5	296	118	5	1.9	145	85	2.5	1.4	1067	161	18.2	2.7	387	88	6.6	1.5	1866	273	31.8	4.1	1680	266	28.6	4.1	817	148	13.9
0500000US51027	51027	Buchanan County, Virginia	9406	302	9406	(X)	6618	306	70.4	2.9	2254	234	24	2.3	4881	304	51.9	3.2	1455	190	15.5	1.9	411	131	4.4	1.4	154	76	1.6	0.8	1326	234	14.1	2.4	645	174	6.9	1.8	2788	307	29.6	2.9	2386	266	25.4	2.6	1146	169	12.2
0500000US51029	51029	Buckingham County, Virginia	5802	317	5802	(X)	4107	277	70.8	4.1	1506	241	26	3.6	2865	229	49.4	4.1	884	188	15.2	3	294	121	5.1	2	188	101	3.2	1.7	948	164	16.3	2.6	434	130	7.5	2.1	1695	277	29.2	4.1	1465	267	25.2	4.1	603	141	10.4
0500000US51031	51031	Campbell County, Virginia	21728	381	21728	(X)	15226	453	70.1	2	5606	356	25.8	1.6	11650	447	53.6	2	3796	329	17.5	1.5	815	194	3.8	0.9	436	131	2	0.6	2761	325	12.7	1.5	1374	277	6.3	1.3	6502	471	29.9	2	5575	418	25.7	1.8	2222	255	10.2
0500000US51033	51033	Caroline County, Virginia	10728	315	10728	(X)	8044	385	75	3	3048	325	28.4	3	5605	338	52.2	3	1933	261	18	2.5	713	196	6.6	1.8	249	122	2.3	1.1	1726	289	16.1	2.6	866	199	8.1	1.8	2684	337	25	3	2119	297	19.8	2.7	875	196	8.2
0500000US51035	51035	Carroll County, Virginia	12508	376	12508	(X)	8532	372	68.2	2.6	2883	266	23	2	6626	421	53	3	1915	231	15.3	1.7	627	189	5	1.5	362	150	2.9	1.2	1279	230	10.2	1.8	606	167	4.8	1.3	3976	366	31.8	2.6	3572	357	28.6	2.6	1801	222	14.4
0500000US51036	51036	Charles City County, Virginia	2832	106	2832	(X)	1883	120	66.5	3.3	514	65	18.1	2.1	1324	113	46.8	3.6	312	51	11	1.7	143	37	5	1.3	48	23	1.7	0.8	416	62	14.7	2	154	48	5.4	1.7	949	97	33.5	3.3	826	91	29.2	3.1	414	61	14.6
0500000US51037	51037	Charlotte County, Virginia	4691	245	4691	(X)	3239	192	69	3	1028	159	21.9	3	2350	216	50.1	4	615	117	13.1	2.4	221	85	4.7	1.8	107	52	2.3	1.1	668	137	14.2	2.9	306	101	6.5	2.1	1452	176	31	3	1277	155	27.2	2.7	697	115	14.9
0500000US51041	51041	Chesterfield County, Virginia	115005	782	115005	(X)	83117	1047	72.3	0.8	38395	1027	33.4	0.8	64374	988	56	0.8	27911	844	24.3	0.7	4671	452	4.1	0.4	2531	347	2.2	0.3	14072	708	12.2	0.6	7953	606	6.9	0.5	31888	946	27.7	0.8	27038	946	23.5	0.8	9054	530	7.9
0500000US51043	51043	Clarke County, Virginia	5619	167	5619	(X)	3812	202	67.8	3.3	1341	138	23.9	2.3	3113	238	55.4	4	980	134	17.4	2.3	110	47	2	0.9	65	38	1.2	0.7	589	149	10.5	2.7	296	114	5.3	2	1807	201	32.2	3.3	1420	192	25.3	3.2	590	180	10.5
0500000US51045	51045	Craig County, Virginia	2151	167	2151	(X)	1451	168	67.5	7.5	507	141	23.6	6.3	1165	173	54.2	8.2	337	98	15.7	4.6	109	101	5.1	4.6	77	92	3.6	4.2	177	93	8.2	4.3	93	71	4.3	3.3	700	187	32.5	7.5	606	168	28.2	6.7	352	111	16.4
0500000US51047	51047	Culpeper County, Virginia	16436	352	16436	(X)	12342	362	75.1	2	5622	339	34.2	2.1	9467	383	57.6	2.4	3875	330	23.6	2.1	893	251	5.4	1.5	486	172	3	1	1982	284	12.1	1.7	1261	245	7.7	1.5	4094	371	24.9	2	3323	307	20.2	1.7	1410	203	8.6
0500000US51049	51049	Cumberland County, Virginia	4038	178	4038	(X)	2739	255	67.8	5.6	926	167	22.9	3.8	1789	211	44.3	5	539	143	13.3	3.4	297	139	7.4	3.4	151	82	3.7	2	653	162	16.2	4	236	115	5.8	2.8	1299	237	32.2	5.6	1044	231	25.9	5.5	466	143	11.5
0500000US51051	51051	Dickenson County, Virginia	6200	253	6200	(X)	4289	267	69.2	3.2	1437	164	23.2	2.4	3280	242	52.9	3.5	1038	157	16.7	2.4	340	103	5.5	1.6	146	71	2.4	1.1	669	129	10.8	1.9	253	78	4.1	1.2	1911	211	30.8	3.2	1772	203	28.6	3.1	706	134	11.4
0500000US51053	51053	Dinwiddie County, Virginia	9956	281	9956	(X)	7158	322	71.9	2.7	2957	250	29.7	2.4	5123	314	51.5	3.3	1838	252	18.5	2.5	447	138	4.5	1.4	184	87	1.8	0.9	1588	269	16	2.5	935	203	9.4	2	2798	290	28.1	2.7	2353	282	23.6	2.7	865	152	8.7
0500000US51057	51057	Essex County, Virginia	4288	168	4288	(X)	2662	235	62.1	4.5	888	139	20.7	2.9	1979	211	46.2	4.6	587	141	13.7	3.1	243	102	5.7	2.3	105	71	2.4	1.6	440	99	10.3	2.2	196	80	4.6	1.8	1626	192	37.9	4.5	1338	199	31.2	4.6	567	117	13.2
0500000US51059	51059	Fairfax County, Virginia	391794	1231	391794	(X)	278935	1711	71.2	0.4	135698	1558	34.6	0.4	226522	2246	57.8	0.5	110425	1664	28.2	0.4	15856	965	4	0.2	6369	650	1.6	0.2	36557	1268	9.3	0.3	18904	929	4.8	0.2	112859	1555	28.8	0.4	88588	1525	22.6	0.4	25456	822	6.5
0500000US51061	51061	Fauquier County, Virginia	23162	443	23162	(X)	17227	482	74.4	1.6	7238	333	31.2	1.3	14391	503	62.1	2.1	5803	354	25.1	1.5	898	194	3.9	0.8	398	130	1.7	0.6	1938	273	8.4	1.1	1037	218	4.5	0.9	5935	381	25.6	1.6	4858	334	21	1.4	1928	233	8.3
0500000US51063	51063	Floyd County, Virginia	6086	305	6086	(X)	4048	234	66.5	3.9	1489	201	24.5	3.1	3535	246	58.1	4.5	1291	189	21.2	3	102	59	1.7	1	40	39	0.7	0.6	411	131	6.8	2.1	158	90	2.6	1.5	2038	296	33.5	3.9	1738	270	28.6	3.6	740	156	12.2
0500000US51065	51065	Fluvanna County, Virginia	9787	287	9787	(X)	7155	359	73.1	3.3	2585	232	26.4	2.3	5807	350	59.3	3.4	2002	223	20.5	2.3	416	161	4.3	1.7	211	135	2.2	1.4	932	198	9.5	2	372	149	3.8	1.5	2632	342	26.9	3.3	2235	294	22.8	2.8	883	194	9
0500000US51067	51067	Franklin County, Virginia	23248	512	23248	(X)	16480	536	70.9	2.3	5797	362	24.9	1.5	13328	530	57.3	2.2	4179	342	18	1.3	830	228	3.6	1	341	140	1.5	0.6	2322	337	10	1.5	1277	264	5.5	1.2	6768	593	29.1	2.3	5916	583	25.4	2.3	2745	292	11.8
0500000US51069	51069	Frederick County, Virginia	29184	468	29184	(X)	21681	585	74.3	1.6	9418	465	32.3	1.4	17741	524	60.8	1.7	7268	422	24.9	1.4	1169	240	4	0.8	596	201	2	0.7	2771	392	9.5	1.3	1554	292	5.3	1	7503	483	25.7	1.6	5644	399	19.3	1.3	2292	270	7.9
0500000US51071	51071	Giles County, Virginia	7253	250	7253	(X)	4992	227	68.8	2.8	1685	147	23.2	1.9	3632	224	50.1	3.2	1138	147	15.7	2	431	112	5.9	1.5	246	88	3.4	1.2	929	165	12.8	2.2	301	85	4.2	1.2	2261	235	31.2	2.8	1946	233	26.8	2.8	858	122	11.8
0500000US51073	51073	Gloucester County, Virginia	14074	340	14074	(X)	10312	427	73.3	2.7	3913	342	27.8	2.2	8256	394	58.7	2.6	2980	309	21.2	2.1	534	209	3.8	1.5	250	124	1.8	0.9	1522	263	10.8	1.9	683	174	4.9	1.2	3762	395	26.7	2.7	3109	390	22.1	2.6	1382	202	9.8
0500000US51075	51075	Goochland County, Virginia	8212	247	8212	(X)	6467	320	78.8	2.8	2073	228	25.2	2.5	5654	322	68.9	3.1	1694	206	20.6	2.3	229	142	2.8	1.7	99	89	1.2	1.1	584	153	7.1	1.8	280	109	3.4	1.3	1745	233	21.2	2.8	1590	231	19.4	2.8	514	145	6.3
0500000US51077	51077	Grayson County, Virginia	6686	263	6686	(X)	4270	276	63.9	3.1	1489	164	22.3	2.1	3240	263	48.5	3.5	973	122	14.6	1.7	279	94	4.2	1.4	136	64	2	0.9	751	132	11.2	1.9	380	109	5.7	1.6	2416	227	36.1	3.1	2154	198	32.2	2.8	1058	136	15.8
0500000US51079	51079	Greene County, Virginia	6965	239	6965	(X)	5082	261	73	3.2	2049	228	29.4	2.9	4005	287	57.5	4	1476	185	21.2	2.6	429	149	6.2	2.2	205	90	2.9	1.3	648	199	9.3	2.8	368	189	5.3	2.7	1883	242	27	3.2	1444	222	20.7	2.9	330	111	4.7
0500000US51081	51081	Greensville County, Virginia	3397	620	3397	(X)	2463	456	72.5	4.3	886	237	26.1	3.8	1591	334	46.8	5.2	457	168	13.5	3.3	253	156	7.4	3.6	92	93	2.7	2.5	619	146	18.2	5	337	97	9.9	3.2	934	241	27.5	4.3	792	206	23.3	3.7	454	91	13.4
0500000US51083	51083	Halifax County, Virginia	14472	375	14472	(X)	9369	441	64.7	2.8	3437	264	23.7	1.6	6766	423	46.8	2.8	2073	201	14.3	1.4	476	128	3.3	0.9	275	115	1.9	0.8	2127	267	14.7	1.8	1089	201	7.5	1.3	5103	449	35.3	2.8	4777	421	33	2.7	2499	258	17.3
0500000US51085	51085	Hanover County, Virginia	37041	383	37041	(X)	28193	533	76.1	1.4	11918	409	32.2	1	23238	572	62.7	1.5	9688	397	26.2	1	1450	224	3.9	0.6	727	169	2	0.5	3505	350	9.5	0.9	1503	243	4.1	0.7	8848	549	23.9	1.4	7208	478	19.5	1.2	3192	321	8.6
0500000US51087	51087	Henrico County, Virginia	123821	1010	123821	(X)	80049	1234	64.6	0.8	37604	949	30.4	0.7	56121	1067	45.3	0.8	24399	776	19.7	0.6	4924	480	4	0.4	2271	342	1.8	0.3	19004	1005	15.3	0.8	10934	716	8.8	0.6	43772	1044	35.4	0.8	36482	1045	29.5	0.8	12666	500	10.2
0500000US51089	51089	Henry County, Virginia	22472	470	22472	(X)	15037	507	66.9	1.9	5374	388	23.9	1.5	10937	457	48.7	2	3403	328	15.1	1.4	1007	194	4.5	0.8	435	146	1.9	0.6	3093	323	13.8	1.4	1536	238	6.8	1	7435	473	33.1	1.9	6753	443	30.1	1.8	2991	280	13.3
0500000US51091	51091	Highland County, Virginia	1067	93	1067	(X)	720	65	67.5	7.4	135	40	12.7	4	609	76	57.1	7.8	99	32	9.3	3.3	27	23	2.5	2.2	13	15	1.2	1.4	84	50	7.9	4.8	23	30	2.2	2.8	347	99	32.5	7.4	301	90	28.2	6.8	174	53	16.3
0500000US51093	51093	Isle of Wight County, Virginia	13519	301	13519	(X)	10251	350	75.8	2.1	3947	270	29.2	1.8	8388	338	62	2.4	2913	215	21.5	1.5	487	120	3.6	0.9	229	87	1.7	0.6	1376	192	10.2	1.4	805	165	6	1.2	3268	307	24.2	2.1	2719	272	20.1	1.9	1242	160	9.2
0500000US51095	51095	James City County, Virginia	27665	538	27665	(X)	19768	557	71.5	1.8	6835	473	24.7	1.7	15840	530	57.3	2	4946	417	17.9	1.5	891	232	3.2	0.8	353	163	1.3	0.6	3037	354	11	1.2	1536	256	5.6	0.9	7897	568	28.5	1.8	6617	534	23.9	1.8	3264	377	11.8
0500000US51097	51097	King and Queen County, Virginia	2832	157	2832	(X)	2021	167	71.4	4.6	642	141	22.7	4.6	1562	178	55.2	5.3	457	132	16.1	4.3	108	58	3.8	2.1	0	17	0	1.1	351	95	12.4	3.3	185	96	6.5	3.4	811	140	28.6	4.6	702	123	24.8	4	392	109	13.8
0500000US51099	51099	King George County, Virginia	8315	282	8315	(X)	6223	284	74.8	2.9	2929	231	35.2	2.9	5068	290	61	3.4	2212	213	26.6	2.7	252	74	3	0.9	129	56	1.6	0.7	903	179	10.9	2.1	588	138	7.1	1.6	2092	270	25.2	2.9	1662	240	20	2.7	494	129	5.9
0500000US51101	51101	King William County, Virginia	6147	150	6147	(X)	4689	211	76.3	3.2	2164	190	35.2	2.9	3655	225	59.5	3.7	1643	186	26.7	3	288	124	4.7	2	153	87	2.5	1.4	746	176	12.1	2.8	368	136	6	2.2	1458	210	23.7	3.2	1201	200	19.5	3.2	501	123	8.2
0500000US51103	51103	Lancaster County, Virginia	5283	290	5283	(X)	3167	263	59.9	3.5	777	161	14.7	2.6	2415	196	45.7	3.1	397	96	7.5	1.7	222	127	4.2	2.3	158	97	3	1.8	530	127	10	2.2	222	93	4.2	1.7	2116	211	40.1	3.5	1872	206	35.4	3.7	1163	155	22
0500000US51105	51105	Lee County, Virginia	9597	424	9597	(X)	6576	370	68.5	2.8	2325	230	24.2	2.3	4962	369	51.7	3.3	1675	195	17.5	2	680	163	7.1	1.7	292	108	3	1.1	934	206	9.7	2.1	358	114	3.7	1.2	3021	309	31.5	2.8	2779	312	29	2.8	1272	163	13.3
0500000US51107	51107	Loudoun County, Virginia	110047	624	110047	(X)	85993	970	78.1	0.7	51640	847	46.9	0.8	72133	1085	65.5	0.9	43617	869	39.6	0.8	4018	427	3.7	0.4	2147	326	2	0.3	9842	594	8.9	0.5	5876	530	5.3	0.5	24054	829	21.9	0.7	18679	703	17	0.6	4906	389	4.5
0500000US51109	51109	Louisa County, Virginia	12811	350	12811	(X)	9288	401	72.5	2.6	3254	330	25.4	2.4	7441	362	58.1	2.5	2312	263	18	1.9	615	190	4.8	1.5	308	146	2.4	1.1	1232	210	9.6	1.7	634	152	4.9	1.2	3523	349	27.5	2.6	2875	317	22.4	2.4	1131	187	8.8
0500000US51111	51111	Lunenburg County, Virginia	4634	337	4634	(X)	3165	312	68.3	3.4	1092	199	23.6	3.3	2284	252	49.3	3.8	685	156	14.8	2.8	262	114	5.7	2.2	110	60	2.4	1.2	619	110	13.4	2.4	297	89	6.4	1.9	1469	166	31.7	3.4	1345	153	29	3.3	732	111	15.8
0500000US51113	51113	Madison County, Virginia	5093	163	5093	(X)	3624	255	71.2	4.9	1238	182	24.3	3.3	2846	259	55.9	5.2	945	180	18.6	3.4	178	92	3.5	1.8	100	72	2	1.4	600	151	11.8	2.9	193	91	3.8	1.8	1469	264	28.8	4.9	1125	241	22.1	4.7	519	155	10.2
0500000US51115	51115	Mathews County, Virginia	3792	322	3792	(X)	2774	268	73.2	4.5	700	171	18.5	3.7	2213	257	58.4	5.4	456	127	12	3	229	119	6	3.1	108	81	2.8	2.1	332	140	8.8	3.6	136	94	3.6	2.4	1018	201	26.8	4.5	919	184	24.2	4.1	598	154	15.8
0500000US51117	51117	Mecklenburg County, Virginia	12857	465	12857	(X)	8057	372	62.7	2.4	2692	253	20.9	1.7	5760	305	44.8	2.2	1623	195	12.6	1.4	460	132	3.6	1	189	83	1.5	0.6	1837	251	14.3	1.9	880	186	6.8	1.4	4800	392	37.3	2.4	4418	389	34.4	2.6	2262	229	17.6
0500000US51119	51119	Middlesex County, Virginia	4432	234	4432	(X)	2986	235	67.4	4.4	854	153	19.3	2.9	2393	229	54	4.6	642	144	14.5	2.9	199	91	4.5	2	64	46	1.4	1	394	98	8.9	2.2	148	57	3.3	1.3	1446	216	32.6	4.4	1299	216	29.3	4.4	711	146	16
0500000US51121	51121	Montgomery County, Virginia	34803	870	34803	(X)	18757	711	53.9	1.8	8017	445	23	1.3	15159	672	43.6	1.5	5928	406	17	1.1	1197	289	3.4	0.8	719	235	2.1	0.7	2401	391	6.9	1.2	1370	322	3.9	0.9	16046	781	46.1	1.8	9783	560	28.1	1.7	2533	281	7.3
0500000US51125	51125	Nelson County, Virginia	6381	310	6381	(X)	4046	261	63.4	3.7	1464	186	22.9	2.9	2958	302	46.4	4.4	936	216	14.7	3.3	247	114	3.9	1.8	42	44	0.7	0.7	841	183	13.2	2.9	486	153	7.6	2.4	2335	286	36.6	3.7	1917	245	30	3.5	993	206	15.6
0500000US51127	51127	New Kent County, Virginia	7106	218	7106	(X)	5487	282	77.2	3.3	1969	200	27.7	2.7	4615	276	64.9	3.4	1523	197	21.4	2.7	259	122	3.6	1.7	72	71	1	1	613	157	8.6	2.2	374	128	5.3	1.8	1619	239	22.8	3.3	1336	203	18.8	2.8	599	152	8.4
0500000US51131	51131	Northampton County, Virginia	5237	244	5237	(X)	3039	225	58	3.5	950	157	18.1	2.7	2210	207	42.2	3.8	599	129	11.4	2.4	153	63	2.9	1.2	70	51	1.3	1	676	123	12.9	2.2	281	90	5.4	1.7	2198	217	42	3.5	1889	201	36.1	3.6	952	135	18.2
0500000US51133	51133	Northumberland County, Virginia	5669	306	5669	(X)	3862	302	68.1	4	1093	190	19.3	2.9	3132	260	55.2	4.1	700	155	12.3	2.6	129	90	2.3	1.6	58	50	1	0.9	601	158	10.6	2.7	335	145	5.9	2.4	1807	254	31.9	4	1596	252	28.2	4.1	819	176	14.4
0500000US51135	51135	Nottoway County, Virginia	5640	220	5640	(X)	3686	265	65.4	4.5	1425	182	25.3	3	2499	263	44.3	4.7	821	175	14.6	3	433	139	7.7	2.5	185	108	3.3	1.9	754	146	13.4	2.5	419	136	7.4	2.3	1954	283	34.6	4.5	1694	255	30	4.2	928	187	16.5
0500000US51137	51137	Orange County, Virginia	12433	361	12433	(X)	9261	407	74.5	3	3537	304	28.4	2.3	7101	381	57.1	3.1	2353	279	18.9	2.2	644	183	5.2	1.5	389	164	3.1	1.3	1516	231	12.2	1.8	795	198	6.4	1.6	3172	400	25.5	3	2728	340	21.9	2.6	1217	205	9.8
0500000US51139	51139	Page County, Virginia	9526	306	9526	(X)	6771	337	71.1	2.9	2388	218	25.1	2.1	5014	331	52.6	3.2	1543	247	16.2	2.5	569	184	6	1.9	336	150	3.5	1.6	1188	235	12.5	2.4	509	123	5.3	1.3	2755	297	28.9	2.9	2270	261	23.8	2.6	1056	162	11.1
0500000US51141	51141	Patrick County, Virginia	7678	354	7678	(X)	5034	343	65.6	3.1	1716	200	22.3	2.4	4031	340	52.5	3.6	1159	185	15.1	2.3	181	81	2.4	1.1	71	44	0.9	0.6	822	191	10.7	2.4	486	153	6.3	2	2644	256	34.4	3.1	2297	274	29.9	3.2	1076	192	14
0500000US51143	51143	Pittsylvania County, Virginia	26029	528	26029	(X)	18209	499	70	1.8	6437	402	24.7	1.5	13629	471	52.4	1.8	4372	331	16.8	1.2	1221	210	4.7	0.8	465	129	1.8	0.5	3359	323	12.9	1.2	1600	231	6.1	0.9	7820	551	30	1.8	6996	502	26.9	1.7	2977	304	11.4
0500000US51145	51145	Powhatan County, Virginia	9590	247	9590	(X)	7696	309	80.3	2.6	2893	222	30.2	2.1	6301	302	65.7	3	2307	222	24.1	2.2	386	130	4	1.3	130	80	1.4	0.8	1009	203	10.5	2	456	156	4.8	1.6	1894	257	19.7	2.6	1650	239	17.2	2.4	737	133	7.7
0500000US51147	51147	Prince Edward County, Virginia	7604	362	7604	(X)	4911	316	64.6	3.9	1946	259	25.6	3.2	3371	241	44.3	3.3	1096	126	14.4	1.7	337	134	4.4	1.8	185	106	2.4	1.4	1203	227	15.8	2.8	665	240	8.7	3	2693	356	35.4	3.9	2126	306	28	3.8	812	144	10.7
0500000US51149	51149	Prince George County, Virginia	10906	364	10906	(X)	8871	426	81.3	2.3	3961	332	36.3	2.6	7011	372	64.3	2.7	2880	280	26.4	2.3	689	177	6.3	1.6	469	152	4.3	1.4	1171	217	10.7	1.9	612	151	5.6	1.4	2035	248	18.7	2.3	1833	243	16.8	2.3	716	151	6.6
0500000US51153	51153	Prince William County, Virginia	134737	810	134737	(X)	104407	1276	77.5	0.8	57726	1166	42.8	0.8	80974	1300	60.1	0.9	44311	1093	32.9	0.8	7449	750	5.5	0.6	4140	548	3.1	0.4	15984	805	11.9	0.6	9275	714	6.9	0.5	30330	1103	22.5	0.8	23977	1007	17.8	0.7	5701	398	4.2
0500000US51155	51155	Pulaski County, Virginia	15125	331	15125	(X)	10171	432	67.2	2.4	3186	307	21.1	1.9	7515	411	49.7	2.5	2025	223	13.4	1.4	733	193	4.8	1.3	387	129	2.6	0.8	1923	288	12.7	1.9	774	188	5.1	1.2	4954	372	32.8	2.4	4245	380	28.1	2.4	1758	237	11.6
0500000US51157	51157	Rappahannock County, Virginia	3281	144	3281	(X)	2151	171	65.6	4.4	671	110	20.5	3.1	1893	174	57.7	4.9	554	100	16.9	2.9	140	60	4.3	1.8	93	49	2.8	1.5	118	72	3.6	2.1	24	39	0.7	1.2	1130	152	34.4	4.4	919	144	28	4.2	354	84	10.8
0500000US51159	51159	Richmond County, Virginia	2800	400	2800	(X)	1852	312	66.1	5.3	576	277	20.6	7.5	1342	268	47.9	5.6	349	238	12.5	7.1	110	63	3.9	2.2	23	26	0.8	0.9	400	111	14.3	3.7	204	108	7.3	3.6	948	195	33.9	5.3	815	188	29.1	4.9	517	117	18.5
0500000US51161	51161	Roanoke County, Virginia	38197	401	38197	(X)	25573	586	67	1.5	10031	448	26.3	1.2	20333	621	53.2	1.6	7513	406	19.7	1.1	1513	261	4	0.7	829	230	2.2	0.6	3727	339	9.8	0.9	1689	326	4.4	0.9	12624	621	33	1.5	11077	627	29	1.5	4717	354	12.3
0500000US51163	51163	Rockbridge County, Virginia	9226	313	9226	(X)	6235	301	67.6	2.9	1858	196	20.1	1.9	5142	312	55.7	3.3	1384	199	15	2.1	385	130	4.2	1.4	173	95	1.9	1	708	147	7.7	1.5	301	118	3.3	1.3	2991	305	32.4	2.9	2433	301	26.4	3	1349	234	14.6
0500000US51165	51165	Rockingham County, Virginia	29483	480	29483	(X)	21342	523	72.4	1.5	8129	322	27.6	1.1	17227	572	58.4	1.7	6226	356	21.1	1.2	1176	193	4	0.6	451	125	1.5	0.4	2939	294	10	1	1452	224	4.9	0.8	8141	463	27.6	1.5	6719	408	22.8	1.3	3149	258	10.7
0500000US51167	51167	Russell County, Virginia	11037	362	11037	(X)	7386	392	66.9	2.9	2431	226	22	1.8	5748	385	52.1	3	1773	204	16.1	1.8	519	155	4.7	1.4	199	111	1.8	1	1119	198	10.1	1.8	459	122	4.2	1.1	3651	343	33.1	2.9	3315	328	30	2.8	1697	238	15.4
0500000US51169	51169	Scott County, Virginia	9363	287	9363	(X)	6538	299	69.8	2.5	2125	185	22.7	1.8	5251	324	56.1	3.3	1632	186	17.4	1.9	361	119	3.9	1.2	99	57	1.1	0.6	926	162	9.9	1.7	394	97	4.2	1	2825	260	30.2	2.5	2608	248	27.9	2.5	1399	174	14.9
0500000US51171	51171	Shenandoah County, Virginia	17246	293	17246	(X)	11987	365	69.5	2.1	4511	270	26.2	1.6	9279	387	53.8	2.4	3000	275	17.4	1.6	1041	237	6	1.4	537	179	3.1	1	1667	290	9.7	1.7	974	195	5.6	1.1	5259	403	30.5	2.1	4512	389	26.2	2.1	2092	252	12.1
0500000US51173	51173	Smyth County, Virginia	12852	300	12852	(X)	8856	367	68.9	2.3	3072	238	23.9	1.7	6551	356	51	2.6	2007	198	15.6	1.5	759	162	5.9	1.2	299	111	2.3	0.9	1546	217	12	1.6	766	143	6	1.1	3996	302	31.1	2.3	3543	274	27.6	2.1	1615	202	12.6
0500000US51175	51175	Southampton County, Virginia	6654	261	6654	(X)	4892	231	73.5	2.8	1809	206	27.2	2.9	3602	266	54.1	4	1116	163	16.8	2.4	202	73	3	1.1	115	55	1.7	0.8	1088	178	16.4	2.5	578	146	8.7	2.1	1762	217	26.5	2.8	1504	210	22.6	2.9	694	131	10.4
0500000US51177	51177	Spotsylvania County, Virginia	42280	531	42280	(X)	33285	636	78.7	1.2	15503	538	36.7	1.2	26234	643	62	1.4	11548	502	27.3	1.2	1843	292	4.4	0.7	1001	215	2.4	0.5	5208	464	12.3	1.1	2954	399	7	0.9	8995	539	21.3	1.2	7249	527	17.1	1.2	2827	296	6.7
0500000US51179	51179	Stafford County, Virginia	42763	544	42763	(X)	34753	629	81.3	1.2	17704	507	41.4	1.1	28280	688	66.1	1.4	13745	516	32.1	1.2	1682	295	3.9	0.7	884	229	2.1	0.5	4791	511	11.2	1.2	3075	385	7.2	0.9	8010	529	18.7	1.2	6419	486	15	1.1	1780	253	4.2
0500000US51181	51181	Surry County, Virginia	2652	142	2652	(X)	1895	173	71.5	4.5	679	121	25.6	4	1347	147	50.8	4.8	410	101	15.5	3.8	151	80	5.7	3	97	73	3.7	2.8	397	118	15	4.1	172	94	6.5	3.4	757	119	28.5	4.5	627	110	23.6	4.2	267	78	10.1
0500000US51183	51183	Sussex County, Virginia	3261	517	3261	(X)	2022	357	62	4.4	661	208	20.3	4	1278	202	39.2	3.7	304	117	9.3	2.6	139	74	4.3	1.9	62	40	1.9	1.2	605	154	18.6	3.1	295	113	9	2.7	1239	242	38	4.4	1078	201	33.1	4.4	449	109	13.8
0500000US51185	51185	Tazewell County, Virginia	18306	380	18306	(X)	12369	441	67.6	2.2	4386	329	24	1.6	9608	435	52.5	2.3	3301	330	18	1.7	837	170	4.6	0.9	295	119	1.6	0.6	1924	295	10.5	1.6	790	161	4.3	0.9	5937	437	32.4	2.2	5248	437	28.7	2.2	2436	232	13.3
0500000US51187	51187	Warren County, Virginia	14324	341	14324	(X)	10138	360	70.8	2.1	4592	268	32.1	1.8	7510	424	52.4	3	3126	295	21.8	2.1	855	225	6	1.6	371	146	2.6	1	1773	277	12.4	1.9	1095	246	7.6	1.7	4186	333	29.2	2.1	3410	327	23.8	2.1	1377	182	9.6
0500000US51191	51191	Washington County, Virginia	22842	359	22842	(X)	15408	488	67.5	1.8	5764	389	25.2	1.6	12088	460	52.9	1.7	4084	379	17.9	1.6	931	243	4.1	1.1	452	158	2	0.7	2389	280	10.5	1.2	1228	240	5.4	1.1	7434	436	32.5	1.8	6444	423	28.2	1.8	2784	244	12.2
0500000US51193	51193	Westmoreland County, Virginia	6981	362	6981	(X)	4384	324	62.8	3.8	1187	217	17	2.8	3206	293	45.9	4.1	704	163	10.1	2.3	329	127	4.7	1.8	180	115	2.6	1.6	849	211	12.2	2.9	303	127	4.3	1.8	2597	317	37.2	3.8	2250	309	32.2	3.8	954	168	13.7
0500000US51195	51195	Wise County, Virginia	15517	343	15517	(X)	10465	410	67.4	2.3	3892	295	25.1	1.8	7865	377	50.7	2.3	2695	244	17.4	1.5	645	151	4.2	1	249	107	1.6	0.7	1955	286	12.6	1.8	948	204	6.1	1.3	5052	379	32.6	2.3	4249	385	27.4	2.3	1740	218	11.2
0500000US51197	51197	Wythe County, Virginia	11984	368	11984	(X)	7976	386	66.6	2.5	2858	336	23.8	2.5	6103	344	50.9	2.7	1874	274	15.6	2.2	584	167	4.9	1.4	316	141	2.6	1.2	1289	237	10.8	1.9	668	181	5.6	1.5	4008	326	33.4	2.5	3558	320	29.7	2.5	1703	231	14.2
0500000US51199	51199	York County, Virginia	23970	372	23970	(X)	18741	422	78.2	1.6	8499	359	35.5	1.5	15240	515	63.6	2.1	6528	358	27.2	1.5	670	199	2.8	0.8	316	120	1.3	0.5	2831	349	11.8	1.4	1655	271	6.9	1.1	5229	417	21.8	1.6	4362	390	18.2	1.5	1774	235	7.4
0500000US51510	51510	Alexandria city, Virginia	65916	754	65916	(X)	31353	883	47.6	1.2	13528	565	20.5	0.9	23616	763	35.8	1.1	9424	447	14.3	0.7	2366	320	3.6	0.5	1013	238	1.5	0.4	5371	473	8.1	0.7	3091	381	4.7	0.6	34563	900	52.4	1.2	28174	879	42.7	1.3	5029	367	7.6
0500000US51520	51520	Bristol city, Virginia	7764	254	7764	(X)	5004	313	64.5	3.9	2114	241	27.2	3	3133	288	40.4	3.7	911	196	11.7	2.5	463	154	6	2	372	154	4.8	2	1408	257	18.1	3.3	831	229	10.7	2.9	2760	340	35.5	3.9	2351	315	30.3	3.8	1227	162	15.8
0500000US51530	51530	Buena Vista city, Virginia	2741	121	2741	(X)	1789	211	65.3	6.4	946	186	34.5	6.4	1292	188	47.1	6.4	640	157	23.3	5.7	211	118	7.7	4.3	150	113	5.5	4.1	286	118	10.4	4.2	156	94	5.7	3.4	952	168	34.7	6.4	872	161	31.8	6	477	153	17.4
0500000US51540	51540	Charlottesville city, Virginia	17604	362	17604	(X)	7682	344	43.6	2	3646	299	20.7	1.7	5253	279	29.8	1.7	2152	214	12.2	1.2	604	143	3.4	0.8	337	111	1.9	0.6	1825	231	10.4	1.3	1157	217	6.6	1.2	9922	465	56.4	2	6511	452	37	2.4	1646	190	9.4
0500000US51550	51550	Chesapeake city, Virginia	80388	786	80388	(X)	60216	909	74.9	1	26980	832	33.6	1	43993	944	54.7	1.1	18565	649	23.1	0.8	3764	454	4.7	0.6	1706	295	2.1	0.4	12459	656	15.5	0.8	6709	538	8.3	0.7	20172	822	25.1	1	16796	775	20.9	0.9	5496	421	6.8
0500000US51570	51570	Colonial Heights city, Virginia	7025	156	7025	(X)	4554	170	64.8	2.6	1850	152	26.3	2.1	3118	188	44.4	2.7	1148	134	16.3	1.9	395	115	5.6	1.6	200	79	2.8	1.1	1041	187	14.8	2.7	502	136	7.1	1.9	2471	207	35.2	2.6	2007	203	28.6	2.6	1023	140	14.6
0500000US51580	51580	Covington city, Virginia	2468	121	2468	(X)	1410	120	57.1	4.5	623	108	25.2	4.2	1014	124	41.1	5.1	398	98	16.1	4	79	49	3.2	1.9	43	40	1.7	1.6	317	111	12.8	4.4	182	83	7.4	3.3	1058	130	42.9	4.5	988	131	40	4.6	474	102	19.2
0500000US51590	51590	Danville city, Virginia	18520	411	18520	(X)	11031	428	59.6	1.9	4139	285	22.3	1.5	6256	342	33.8	1.9	1681	212	9.1	1.2	882	187	4.8	1	356	133	1.9	0.7	3893	315	21	1.5	2102	261	11.3	1.3	7489	402	40.4	1.9	6655	408	35.9	2.1	2735	275	14.8
0500000US51595	51595	Emporia city, Virginia	2420	168	2420	(X)	1422	153	58.8	6	669	136	27.6	5.5	672	119	27.8	5	270	93	11.2	3.9	181	105	7.5	4.4	25	31	1	1.3	569	137	23.5	5.4	374	123	15.5	4.9	998	176	41.2	6	883	160	36.5	5.2	374	86	15.5
0500000US51600	51600	Fairfax city, Virginia	8480	141	8480	(X)	5580	254	65.8	2.7	2254	196	26.6	2.2	4400	275	51.9	3.2	1750	193	20.6	2.2	359	126	4.2	1.5	190	95	2.2	1.1	821	182	9.7	2.1	314	112	3.7	1.3	2900	233	34.2	2.7	1844	226	21.7	2.6	750	135	8.8
0500000US51610	51610	Falls Church city, Virginia	4966	180	4966	(X)	3135	229	63.1	4.2	1668	174	33.6	3.5	2496	221	50.3	4.2	1292	131	26	2.6	125	77	2.5	1.5	64	50	1.3	1	514	182	10.4	3.6	312	142	6.3	2.9	1831	225	36.9	4.2	1597	213	32.2	4	415	115	8.4
0500000US51620	51620	Franklin city, Virginia	3580	153	3580	(X)	2412	208	67.4	5.5	1074	148	30	3.8	1303	172	36.4	4.8	568	155	15.9	4.2	73	47	2	1.3	0	17	0	0.9	1036	180	28.9	4.9	506	121	14.1	3.3	1168	212	32.6	5.5	1066	204	29.8	5.4	421	113	11.8
0500000US51630	51630	Fredericksburg city, Virginia	9849	380	9849	(X)	5440	355	55.2	3.1	2729	306	27.7	3	3326	289	33.8	2.8	1434	215	14.6	2.1	342	174	3.5	1.8	113	89	1.1	0.9	1772	310	18	3	1182	286	12	2.9	4409	368	44.8	3.1	3512	385	35.7	3.6	817	153	8.3
0500000US51640	51640	Galax city, Virginia	2968	187	2968	(X)	1724	136	58.1	5.7	653	114	22	4.3	1132	146	38.1	5.8	352	109	11.9	3.8	135	74	4.5	2.5	57	44	1.9	1.5	457	134	15.4	4.5	244	106	8.2	3.6	1244	225	41.9	5.7	1121	227	37.8	6	399	121	13.4
0500000US51650	51650	Hampton city, Virginia	52700	724	52700	(X)	33105	798	62.8	1.3	13684	655	26	1.1	21441	691	40.7	1.3	7138	521	13.5	1	2069	325	3.9	0.6	986	221	1.9	0.4	9595	555	18.2	1	5560	507	10.6	0.9	19595	731	37.2	1.3	16297	651	30.9	1.2	5467	352	10.4
0500000US51660	51660	Harrisonburg city, Virginia	15881	356	15881	(X)	8048	390	50.7	2.3	3839	298	24.2	1.9	5802	366	36.5	2.2	2529	283	15.9	1.8	751	228	4.7	1.4	475	198	3	1.2	1495	274	9.4	1.7	835	230	5.3	1.4	7833	424	49.3	2.3	4181	383	26.3	2.4	1265	170	8
0500000US51670	51670	Hopewell city, Virginia	8774	277	8774	(X)	5449	346	62.1	3.8	2383	309	27.2	3.4	2881	318	32.8	3.6	893	209	10.2	2.3	569	194	6.5	2.2	224	138	2.6	1.6	1999	245	22.8	2.9	1266	199	14.4	2.3	3325	368	37.9	3.8	2943	352	33.5	3.8	1146	180	13.1
0500000US51678	51678	Lexington city, Virginia	1727	847	1727	(X)	857	381	49.6	8.1	354	164	20.5	5.3	697	330	40.4	8	244	132	14.1	5	0	17	0	1.9	0	17	0	1.9	160	87	9.3	4	110	69	6.4	3.3	870	508	50.4	8.1	713	389	41.3	7.3	396	176	22.9
0500000US51680	51680	Lynchburg city, Virginia	28424	556	28424	(X)	16199	516	57	1.7	7402	462	26	1.5	10837	487	38.1	1.7	4442	419	15.6	1.4	969	218	3.4	0.8	462	162	1.6	0.6	4393	319	15.5	1.1	2498	288	8.8	1	12225	566	43	1.7	9868	432	34.7	1.3	3641	272	12.8
0500000US51683	51683	Manassas city, Virginia	12274	286	12274	(X)	9173	339	74.7	2.7	4713	334	38.4	2.7	6801	374	55.4	2.8	3307	352	26.9	2.8	598	190	4.9	1.6	301	156	2.5	1.3	1774	254	14.5	2.1	1105	253	9	2.1	3101	362	25.3	2.7	2496	306	20.3	2.3	676	145	5.5
0500000US51685	51685	Manassas Park city, Virginia	4526	176	4526	(X)	3297	224	72.8	4.3	1747	209	38.6	4.4	2523	217	55.7	4.7	1329	188	29.4	4.1	127	80	2.8	1.7	48	42	1.1	0.9	647	172	14.3	3.7	370	146	8.2	3.2	1229	201	27.2	4.3	1077	186	23.8	3.9	346	105	7.6
0500000US51690	51690	Martinsville city, Virginia	5974	231	5974	(X)	3315	239	55.5	3.6	1348	209	22.6	3.2	1894	201	31.7	3.2	577	137	9.7	2.2	241	108	4	1.8	131	93	2.2	1.6	1180	161	19.8	2.6	640	151	10.7	2.4	2659	248	44.5	3.6	2471	249	41.4	3.6	990	163	16.6
0500000US51700	51700	Newport News city, Virginia	68987	901	68987	(X)	42998	999	62.3	1.3	19930	722	28.9	1	27079	898	39.3	1.2	10682	555	15.5	0.8	3612	496	5.2	0.7	1881	368	2.7	0.5	12307	603	17.8	0.9	7367	479	10.7	0.7	25989	975	37.7	1.3	21704	928	31.5	1.2	6165	416	8.9
0500000US51710	51710	Norfolk city, Virginia	86397	1112	86397	(X)	50026	996	57.9	1	23405	772	27.1	0.8	29635	990	34.3	1.1	11923	630	13.8	0.7	4665	483	5.4	0.6	2168	343	2.5	0.4	15726	589	18.2	0.7	9314	537	10.8	0.6	36371	1074	42.1	1	28159	917	32.6	0.9	7807	389	9
0500000US51720	51720	Norton city, Virginia	1655	136	1655	(X)	885	116	53.5	7.5	325	82	19.6	5.2	480	133	29	7.9	181	78	10.9	4.7	77	48	4.7	2.8	17	27	1	1.6	328	125	19.8	7.8	127	90	7.7	5.6	770	163	46.5	7.5	618	162	37.3	8.3	151	65	9.1
0500000US51730	51730	Petersburg city, Virginia	12515	300	12515	(X)	7197	374	57.5	2.7	2598	318	20.8	2.4	3556	290	28.4	2.3	738	162	5.9	1.3	466	146	3.7	1.1	177	84	1.4	0.7	3175	282	25.4	2.2	1683	237	13.4	1.8	5318	359	42.5	2.7	4402	348	35.2	2.6	1608	175	12.8
0500000US51735	51735	Poquoson city, Virginia	4627	76	4627	(X)	3507	173	75.8	3.8	1407	130	30.4	2.8	2881	179	62.3	3.8	1059	131	22.9	2.8	158	66	3.4	1.4	41	33	0.9	0.7	468	115	10.1	2.5	307	103	6.6	2.2	1120	181	24.2	3.8	970	178	21	3.8	457	103	9.9
0500000US51740	51740	Portsmouth city, Virginia	36764	677	36764	(X)	23674	617	64.4	1.5	9839	461	26.8	1.1	13659	588	37.2	1.6	4640	396	12.6	1	2007	289	5.5	0.8	821	200	2.2	0.5	8008	557	21.8	1.5	4378	453	11.9	1.2	13090	632	35.6	1.5	11160	612	30.4	1.5	3746	266	10.2
0500000US51750	51750	Radford city, Virginia	5333	342	5333	(X)	2451	239	46	4.2	1076	243	20.2	4.5	1659	205	31.1	3.7	570	166	10.7	3	163	85	3.1	1.6	87	48	1.6	0.9	629	155	11.8	2.8	419	149	7.9	2.8	2882	329	54	4.2	1766	267	33.1	4.8	517	110	9.7
0500000US51760	51760	Richmond city, Virginia	85913	1272	85913	(X)	40413	984	47	0.9	17901	761	20.8	0.8	20451	689	23.8	0.8	7459	516	8.7	0.6	4010	459	4.7	0.5	1513	264	1.8	0.3	15952	732	18.6	0.8	8929	602	10.4	0.7	45500	1078	53	0.9	35548	1001	41.4	1	9666	523	11.3
0500000US51770	51770	Roanoke city, Virginia	42549	604	42549	(X)	23787	626	55.9	1.3	9652	491	22.7	1.1	14534	642	34.2	1.5	4874	422	11.5	1	2053	303	4.8	0.7	913	230	2.1	0.5	7200	517	16.9	1.2	3865	422	9.1	1	18762	651	44.1	1.3	15916	592	37.4	1.2	5420	412	12.7
0500000US51775	51775	Salem city, Virginia	9953	256	9953	(X)	6200	293	62.3	2.5	2503	218	25.1	2.2	4543	324	45.6	3	1531	212	15.4	2.1	367	142	3.7	1.4	209	114	2.1	1.2	1290	236	13	2.3	763	209	7.7	2.1	3753	269	37.7	2.5	3198	256	32.1	2.4	1149	169	11.5
0500000US51790	51790	Staunton city, Virginia	10503	297	10503	(X)	5910	321	56.3	2.7	2247	260	21.4	2.3	4249	228	40.5	2.3	1303	176	12.4	1.6	341	118	3.2	1.1	166	71	1.6	0.7	1320	245	12.6	2.2	778	200	7.4	1.8	4593	324	43.7	2.7	3963	316	37.7	2.8	1855	197	17.7
0500000US51800	51800	Suffolk city, Virginia	30798	392	30798	(X)	22600	492	73.4	1.4	10015	471	32.5	1.4	16052	560	52.1	1.7	6566	454	21.3	1.4	1309	262	4.3	0.8	618	187	2	0.6	5239	355	17	1.1	2831	269	9.2	0.9	8198	445	26.6	1.4	6968	414	22.6	1.3	2447	222	7.9
0500000US51810	51810	Virginia Beach city, Virginia	165296	936	165296	(X)	114020	1282	69	0.6	53176	1127	32.2	0.6	84548	1158	51.1	0.6	36030	899	21.8	0.5	6475	517	3.9	0.3	3324	393	2	0.2	22997	828	13.9	0.5	13822	743	8.4	0.4	51276	1090	31	0.6	39497	1102	23.9	0.7	13283	619	8
0500000US51820	51820	Waynesboro city, Virginia	8878	264	8878	(X)	5589	309	63	3.1	2442	253	27.5	2.6	3714	324	41.8	3.6	1390	248	15.7	2.7	378	143	4.3	1.6	203	108	2.3	1.2	1497	220	16.9	2.4	849	243	9.6	2.7	3289	294	37	3.1	2857	300	32.2	3.2	1393	198	15.7
0500000US51830	51830	Williamsburg city, Virginia	4365	260	4365	(X)	2213	186	50.7	3.7	835	137	19.1	2.9	1620	174	37.1	3.3	457	118	10.5	2.5	153	66	3.5	1.5	74	50	1.7	1.1	440	105	10.1	2.5	304	98	7	2.3	2152	225	49.3	3.7	1745	192	40	4.4	661	114	15.1
0500000US51840	51840	Winchester city, Virginia	10692	336	10692	(X)	6128	329	57.3	2.8	2732	277	25.6	2.5	4199	298	39.3	3	1653	227	15.5	2.2	514	179	4.8	1.7	270	126	2.5	1.2	1415	255	13.2	2.2	809	226	7.6	2	4564	359	42.7	2.8	3551	323	33.2	2.7	1277	180	11.9
0500000US54001	54001	Barbour County, West Virginia	6179	223	6179	(X)	4272	243	69.1	2.6	1472	187	23.8	2.7	3413	211	55.2	2.7	990	155	16	2.4	212	77	3.4	1.2	152	74	2.5	1.2	647	139	10.5	2.1	330	114	5.3	1.8	1907	161	30.9	2.6	1675	162	27.1	2.6	778	121	12.6
0500000US54003	54003	Berkeley County, West Virginia	40614	561	40614	(X)	28848	776	71	1.5	12583	653	31	1.5	21060	742	51.9	1.7	7824	548	19.3	1.3	2274	407	5.6	1	1399	295	3.4	0.7	5514	598	13.6	1.4	3360	473	8.3	1.2	11766	611	29	1.5	9716	568	23.9	1.4	3056	317	7.5
0500000US54005	54005	Boone County, West Virginia	9602	208	9602	(X)	6947	260	72.3	2.4	2680	228	27.9	2.3	5211	334	54.3	3.2	1902	208	19.8	2.1	511	146	5.3	1.5	270	111	2.8	1.2	1225	179	12.8	1.9	508	130	5.3	1.4	2655	240	27.7	2.4	2332	218	24.3	2.2	1039	154	10.8
0500000US54007	54007	Braxton County, West Virginia	5652	242	5652	(X)	3763	248	66.6	3.6	1022	133	18.1	2.1	2981	222	52.7	3.6	671	117	11.9	2	310	100	5.5	1.7	143	74	2.5	1.3	472	109	8.4	1.9	208	84	3.7	1.5	1889	228	33.4	3.6	1658	203	29.3	3.4	781	147	13.8
0500000US54009	54009	Brooke County, West Virginia	10086	212	10086	(X)	6553	298	65	2.7	2204	239	21.9	2.2	4760	305	47.2	3	1336	194	13.2	1.9	580	147	5.8	1.4	227	104	2.3	1	1213	228	12	2.2	641	169	6.4	1.7	3533	285	35	2.7	3121	290	30.9	2.8	1304	211	12.9
0500000US54011	54011	Cabell County, West Virginia	40220	594	40220	(X)	23677	670	58.9	1.6	9606	437	23.9	1.1	16480	610	41	1.5	5393	385	13.4	0.9	1702	270	4.2	0.7	921	235	2.3	0.6	5495	453	13.7	1.1	3292	364	8.2	0.9	16543	704	41.1	1.6	13515	676	33.6	1.6	4823	424	12
0500000US54013	54013	Calhoun County, West Virginia	3112	170	3112	(X)	2117	168	68	4.8	856	141	27.5	4.2	1524	162	49	4.6	487	110	15.6	3.3	199	81	6.4	2.6	84	52	2.7	1.7	394	106	12.7	3.4	285	93	9.2	3	995	172	32	4.8	859	153	27.6	4.3	485	107	15.6
0500000US54015	54015	Clay County, West Virginia	3486	177	3486	(X)	2490	181	71.4	4.4	920	141	26.4	3.6	2106	183	60.4	5.2	741	132	21.3	3.5	106	54	3	1.5	26	30	0.7	0.9	278	102	8	2.8	153	74	4.4	2.1	996	168	28.6	4.4	770	130	22.1	3.5	397	102	11.4
0500000US54017	54017	Doddridge County, West Virginia	2761	166	2761	(X)	1883	181	68.2	4.8	588	136	21.3	4.3	1482	158	53.7	4.9	386	102	14	3.4	114	68	4.1	2.4	67	52	2.4	1.8	287	91	10.4	3.1	135	69	4.9	2.4	878	140	31.8	4.8	764	132	27.7	4.6	343	77	12.4
0500000US54019	54019	Fayette County, West Virginia	17566	380	17566	(X)	11903	456	67.8	1.9	4145	314	23.6	1.6	8484	459	48.3	2.2	2560	297	14.6	1.6	918	217	5.2	1.2	403	143	2.3	0.8	2501	296	14.2	1.6	1182	220	6.7	1.2	5663	327	32.2	1.9	4842	323	27.6	1.8	2186	185	12.4
0500000US54021	54021	Gilmer County, West Virginia	2645	383	2645	(X)	1621	235	61.3	4.3	538	120	20.3	3.2	1299	224	49.1	4.6	366	105	13.8	3.1	120	63	4.5	2.1	60	45	2.3	1.5	202	66	7.6	2.9	112	49	4.2	2	1024	208	38.7	4.3	785	147	29.7	5.1	336	96	12.7
0500000US54023	54023	Grant County, West Virginia	4256	259	4256	(X)	2919	232	68.6	3.8	995	150	23.4	3	2421	226	56.9	4.2	715	133	16.8	3	192	89	4.5	2.1	117	63	2.7	1.5	306	84	7.2	1.9	163	65	3.8	1.4	1337	186	31.4	3.8	1085	180	25.5	3.8	645	117	15.2
0500000US54025	54025	Greenbrier County, West Virginia	15246	340	15246	(X)	9741	408	63.9	2.5	3478	298	22.8	1.9	7370	379	48.3	2.4	2455	271	16.1	1.8	759	188	5	1.2	274	138	1.8	0.9	1612	275	10.6	1.8	749	172	4.9	1.1	5505	410	36.1	2.5	4754	394	31.2	2.4	2153	242	14.1
0500000US54027	54027	Hampshire County, West Virginia	10628	335	10628	(X)	4595	322	43.2	2.7	1570	248	14.8	2.2	3471	311	32.7	2.7	961	195	9	1.8	277	116	2.6	1.1	86	61	0.8	0.6	847	188	8	1.8	523	170	4.9	1.6	6033	343	56.8	2.7	5776	352	54.3	2.8	1819	230	17.1
0500000US54029	54029	Hancock County, West Virginia	12970	265	12970	(X)	8501	336	65.5	2.6	2978	239	23	1.8	6485	361	50	2.9	2068	246	15.9	1.9	588	147	4.5	1.1	258	90	2	0.7	1428	229	11	1.7	652	181	5	1.4	4469	377	34.5	2.6	3937	354	30.4	2.5	1766	215	13.6
0500000US54031	54031	Hardy County, West Virginia	5169	249	5169	(X)	3297	243	63.8	4.3	990	186	19.2	3.4	2526	206	48.9	4.1	616	152	11.9	2.9	352	108	6.8	2	176	76	3.4	1.4	419	108	8.1	2.1	198	85	3.8	1.6	1872	256	36.2	4.3	1674	230	32.4	4	635	133	12.3
0500000US54033	54033	Harrison County, West Virginia	27755	452	27755	(X)	18042	526	65	1.7	6953	388	25.1	1.3	13825	472	49.8	1.6	4901	333	17.7	1.2	971	147	3.5	0.5	558	120	2	0.4	3246	346	11.7	1.2	1494	233	5.4	0.8	9713	501	35	1.7	8591	508	31	1.7	3544	310	12.8
0500000US54035	54035	Jackson County, West Virginia	11242	317	11242	(X)	7760	372	69	2.9	2750	278	24.5	2.4	6046	387	53.8	3.2	1902	248	16.9	2.2	426	162	3.8	1.4	175	107	1.6	0.9	1288	214	11.5	1.9	673	165	6	1.5	3482	351	31	2.9	3026	340	26.9	2.8	1496	199	13.3
0500000US54037	54037	Jefferson County, West Virginia	20126	342	20126	(X)	14269	458	70.9	2	5917	373	29.4	1.8	11095	434	55.1	2.1	4086	298	20.3	1.5	982	165	4.9	0.8	534	139	2.7	0.7	2192	295	10.9	1.4	1297	244	6.4	1.2	5857	419	29.1	2	4555	359	22.6	1.8	1681	211	8.4
0500000US54039	54039	Kanawha County, West Virginia	82531	813	82531	(X)	50937	1080	61.7	1.2	18831	683	22.8	0.8	36739	922	44.5	1.1	11577	555	14	0.7	3703	378	4.5	0.5	1957	316	2.4	0.4	10495	697	12.7	0.8	5297	442	6.4	0.5	31594	1089	38.3	1.2	27038	1043	32.8	1.2	10315	473	12.5
0500000US54041	54041	Lewis County, West Virginia	6476	247	6476	(X)	4402	238	68	3.3	1491	178	23	2.5	3424	238	52.9	3.4	988	165	15.3	2.4	246	91	3.8	1.4	87	57	1.3	0.9	732	151	11.3	2.3	416	108	6.4	1.7	2074	244	32	3.3	1741	221	26.9	2.9	811	122	12.5
0500000US54043	54043	Lincoln County, West Virginia	8128	270	8128	(X)	5625	355	69.2	3.7	2207	255	27.2	3.1	4323	304	53.2	3.6	1460	221	18	2.7	392	143	4.8	1.7	284	127	3.5	1.5	910	197	11.2	2.4	463	142	5.7	1.8	2503	312	30.8	3.7	2285	312	28.1	3.8	1019	229	12.5
0500000US54045	54045	Logan County, West Virginia	14444	376	14444	(X)	10144	432	70.2	2.5	3675	321	25.4	2.1	7583	462	52.5	3	2667	312	18.5	2.1	755	186	5.2	1.3	269	106	1.9	0.7	1806	280	12.5	1.9	739	169	5.1	1.2	4300	377	29.8	2.5	3600	337	24.9	2.3	1579	206	10.9
0500000US54047	54047	McDowell County, West Virginia	8386	281	8386	(X)	5441	267	64.9	2.8	1666	175	19.9	2	3765	280	44.9	3.3	1059	150	12.6	1.7	495	111	5.9	1.3	149	53	1.8	0.6	1181	152	14.1	1.8	458	118	5.5	1.4	2945	271	35.1	2.8	2536	241	30.2	2.6	996	152	11.9
0500000US54049	54049	Marion County, West Virginia	22596	390	22596	(X)	14711	406	65.1	1.7	5455	289	24.1	1.2	11023	394	48.8	1.6	3585	273	15.9	1.2	1056	171	4.7	0.8	581	114	2.6	0.5	2632	270	11.6	1.2	1289	219	5.7	1	7885	427	34.9	1.7	6577	397	29.1	1.6	3112	240	13.8
0500000US54051	54051	Marshall County, West Virginia	13847	307	13847	(X)	9223	384	66.6	2.3	3187	306	23	2	7382	364	53.3	2.4	2237	275	16.2	1.9	564	192	4.1	1.4	335	165	2.4	1.2	1277	235	9.2	1.7	615	160	4.4	1.1	4624	330	33.4	2.3	3812	329	27.5	2.4	1810	226	13.1
0500000US54053	54053	Mason County, West Virginia	10729	351	10729	(X)	7476	375	69.7	3	2713	281	25.3	2.3	5583	342	52	3.2	1797	230	16.7	2	394	147	3.7	1.4	203	121	1.9	1.1	1499	214	14	1.9	713	184	6.6	1.7	3253	357	30.3	3	2807	313	26.2	2.8	1353	191	12.6
0500000US54055	54055	Mercer County, West Virginia	25590	482	25590	(X)	16592	586	64.8	2.2	6350	439	24.8	1.7	12393	626	48.4	2.3	4026	371	15.7	1.4	1053	190	4.1	0.8	565	137	2.2	0.5	3146	328	12.3	1.3	1759	285	6.9	1.1	8998	605	35.2	2.2	7799	577	30.5	2.1	3599	342	14.1
0500000US54057	54057	Mineral County, West Virginia	11148	319	11148	(X)	6200	362	55.6	3	2311	276	20.7	2.4	4651	301	41.7	2.6	1383	192	12.4	1.7	368	142	3.3	1.3	95	93	0.9	0.8	1181	212	10.6	1.9	833	209	7.5	1.9	4948	377	44.4	3	4656	364	41.8	2.9	1813	210	16.3
0500000US54059	54059	Mingo County, West Virginia	10836	256	10836	(X)	7616	340	70.3	2.7	2619	223	24.2	1.9	5778	348	53.3	3	1941	207	17.9	1.8	477	134	4.4	1.2	117	54	1.1	0.5	1361	224	12.6	2.1	561	138	5.2	1.3	3220	298	29.7	2.7	2865	279	26.4	2.6	1097	158	10.1
0500000US54061	54061	Monongalia County, West Virginia	36857	756	36857	(X)	19451	525	52.8	1.2	7782	449	21.1	1.2	15086	511	40.9	1.3	5624	376	15.3	1	1371	271	3.7	0.7	576	155	1.6	0.4	2994	364	8.1	1	1582	271	4.3	0.7	17406	640	47.2	1.2	12762	568	34.6	1.4	2850	259	7.7
0500000US54063	54063	Monroe County, West Virginia	5719	253	5719	(X)	4120	256	72	3.4	1381	194	24.1	3	3131	234	54.7	3.8	962	168	16.8	2.8	200	88	3.5	1.5	97	58	1.7	1	789	187	13.8	3.1	322	123	5.6	2.1	1599	217	28	3.4	1392	203	24.3	3.2	533	133	9.3
0500000US54065	54065	Morgan County, West Virginia	7358	321	7358	(X)	3836	348	52.1	4.2	1248	182	17	2.4	3153	344	42.9	4.2	1017	176	13.8	2.2	234	99	3.2	1.3	56	41	0.8	0.6	449	146	6.1	2	175	92	2.4	1.3	3522	355	47.9	4.2	3132	343	42.6	4.3	1281	221	17.4
0500000US54067	54067	Nicholas County, West Virginia	10686	290	10686	(X)	7599	345	71.1	3.1	2501	237	23.4	2.1	6123	363	57.3	3.5	1985	204	18.6	1.8	534	172	5	1.6	196	113	1.8	1.1	942	203	8.8	1.9	320	118	3	1.1	3087	355	28.9	3.1	2648	318	24.8	2.8	1199	206	11.2
0500000US54069	54069	Ohio County, West Virginia	18582	279	18582	(X)	10899	361	58.7	1.8	3848	285	20.7	1.5	8100	346	43.6	1.9	2398	247	12.9	1.3	611	137	3.3	0.7	333	86	1.8	0.5	2188	265	11.8	1.4	1117	190	6	1	7683	375	41.3	1.8	6834	360	36.8	1.8	2802	219	15.1
0500000US54071	54071	Pendleton County, West Virginia	3199	169	3199	(X)	2034	161	63.6	4.6	623	88	19.5	2.7	1688	169	52.8	4.9	476	84	14.9	2.6	139	53	4.3	1.7	44	40	1.4	1.2	207	67	6.5	2.1	103	54	3.2	1.7	1165	172	36.4	4.6	988	151	30.9	4.2	566	101	17.7
0500000US54073	54073	Pleasants County, West Virginia	2822	141	2822	(X)	1983	150	70.3	4.2	658	114	23.3	3.7	1581	126	56	4.4	429	65	15.2	2.3	154	77	5.5	2.7	86	62	3	2.2	248	77	8.8	2.6	143	69	5.1	2.4	839	126	29.7	4.2	679	123	24.1	4.2	318	62	11.3
0500000US54075	54075	Pocahontas County, West Virginia	3719	200	3719	(X)	2402	189	64.6	4.2	748	135	20.1	3.2	2045	170	55	3.8	558	110	15	2.7	127	50	3.4	1.3	71	35	1.9	0.9	230	75	6.2	2	119	51	3.2	1.4	1317	181	35.4	4.2	1086	173	29.2	4.4	525	119	14.1
0500000US54077	54077	Preston County, West Virginia	12610	275	12610	(X)	8871	336	70.3	2.2	3092	261	24.5	1.9	7257	331	57.5	2.4	2312	244	18.3	1.9	612	154	4.9	1.2	226	95	1.8	0.7	1002	158	7.9	1.2	554	128	4.4	1	3739	285	29.7	2.2	3072	290	24.4	2.2	1440	194	11.4
0500000US54079	54079	Putnam County, West Virginia	21453	369	21453	(X)	15743	461	73.4	1.9	6688	403	31.2	1.8	12675	440	59.1	1.9	4877	349	22.7	1.6	827	216	3.9	1	442	130	2.1	0.6	2241	331	10.4	1.5	1369	265	6.4	1.2	5710	429	26.6	1.9	4840	417	22.6	1.9	1930	267	9
0500000US54081	54081	Raleigh County, West Virginia	31164	602	31164	(X)	20994	694	67.4	1.8	8150	431	26.2	1.2	16026	698	51.4	2.1	5583	405	17.9	1.2	1208	233	3.9	0.7	606	177	1.9	0.6	3760	464	12.1	1.4	1961	342	6.3	1.1	10170	592	32.6	1.8	8714	615	28	1.9	3923	357	12.6
0500000US54083	54083	Randolph County, West Virginia	11351	286	11351	(X)	7612	314	67.1	2	2578	205	22.7	1.7	5909	300	52.1	2.3	1730	213	15.2	1.9	580	157	5.1	1.4	298	112	2.6	1	1123	149	9.9	1.3	550	116	4.8	1	3739	237	32.9	2	3364	247	29.6	2.2	1411	180	12.4
0500000US54085	54085	Ritchie County, West Virginia	4023	183	4023	(X)	2607	187	64.8	3.7	866	111	21.5	2.5	2037	158	50.6	3.4	595	101	14.8	2.5	191	62	4.7	1.5	59	34	1.5	0.8	379	92	9.4	2.2	212	69	5.3	1.7	1416	164	35.2	3.7	1281	156	31.8	3.6	529	98	13.1
0500000US54087	54087	Roane County, West Virginia	5902	167	5902	(X)	3842	230	65.1	3.4	1308	119	22.2	2	3031	213	51.4	3.3	923	105	15.6	1.8	189	95	3.2	1.6	97	76	1.6	1.3	622	147	10.5	2.5	288	103	4.9	1.8	2060	208	34.9	3.4	1770	201	30	3.3	867	117	14.7
0500000US54089	54089	Summers County, West Virginia	5560	223	5560	(X)	3697	257	66.5	3.7	1191	155	21.4	2.5	2948	269	53	4.1	894	156	16.1	2.6	270	81	4.9	1.5	145	67	2.6	1.2	479	138	8.6	2.5	152	68	2.7	1.2	1863	219	33.5	3.7	1734	208	31.2	3.6	864	160	15.5
0500000US54091	54091	Taylor County, West Virginia	6801	183	6801	(X)	4723	260	69.4	3.1	1682	192	24.7	2.6	3502	277	51.5	3.7	1226	184	18	2.6	294	109	4.3	1.6	99	55	1.5	0.8	927	194	13.6	2.9	357	116	5.2	1.7	2078	210	30.6	3.1	1803	217	26.5	3.3	822	168	12.1
0500000US54093	54093	Tucker County, West Virginia	2969	166	2969	(X)	1938	131	65.3	3.3	655	88	22.1	2.8	1683	127	56.7	3.4	526	78	17.7	2.5	95	50	3.2	1.7	52	39	1.8	1.3	160	61	5.4	2.1	77	43	2.6	1.5	1031	123	34.7	3.3	909	113	30.6	3.3	547	90	18.4
0500000US54095	54095	Tyler County, West Virginia	3750	161	3750	(X)	2539	169	67.7	3.1	779	109	20.8	2.6	2022	161	53.9	3.7	571	90	15.2	2.3	129	54	3.4	1.4	41	28	1.1	0.7	388	91	10.3	2.3	167	56	4.5	1.4	1211	124	32.3	3.1	1067	120	28.5	3.2	484	91	12.9
0500000US54097	54097	Upshur County, West Virginia	8937	288	8937	(X)	6164	282	69	2.6	2285	222	25.6	2.1	4893	273	54.7	2.8	1564	211	17.5	2.1	447	136	5	1.5	307	119	3.4	1.3	824	177	9.2	2	414	131	4.6	1.5	2773	256	31	2.6	2349	239	26.3	2.6	1038	151	11.6
0500000US54099	54099	Wayne County, West Virginia	16757	372	16757	(X)	10877	448	64.9	2.4	3821	364	22.8	2	7986	385	47.7	2.3	2504	308	14.9	1.8	745	193	4.4	1.1	357	148	2.1	0.9	2146	305	12.8	1.8	960	211	5.7	1.2	5880	445	35.1	2.4	5241	443	31.3	2.4	2228	256	13.3
0500000US54101	54101	Webster County, West Virginia	3854	198	3854	(X)	2706	217	70.2	3.8	937	145	24.3	3.2	1990	193	51.6	4.4	578	113	15	2.7	252	95	6.5	2.4	69	48	1.8	1.2	464	108	12	2.7	290	82	7.5	2	1148	151	29.8	3.8	988	144	25.6	3.8	534	99	13.9
0500000US54103	54103	Wetzel County, West Virginia	6734	214	6734	(X)	4477	253	66.5	3	1454	139	21.6	1.8	3491	212	51.8	3	970	123	14.4	1.8	238	78	3.5	1.1	128	63	1.9	0.9	748	139	11.1	1.9	356	86	5.3	1.2	2257	213	33.5	3	2020	203	30	2.9	929	140	13.8
0500000US54105	54105	Wirt County, West Virginia	2425	164	2425	(X)	1626	152	67.1	5.7	529	93	21.8	3.4	1289	142	53.2	5.9	370	79	15.3	3.1	46	31	1.9	1.3	4	8	0.2	0.3	291	88	12	3.5	155	67	6.4	2.7	799	161	32.9	5.7	578	132	23.8	4.9	325	92	13.4
0500000US54107	54107	Wood County, West Virginia	35900	510	35900	(X)	23059	478	64.2	1.2	8583	473	23.9	1.3	17792	590	49.6	1.6	5819	447	16.2	1.2	1530	237	4.3	0.7	686	173	1.9	0.5	3737	339	10.4	0.9	2078	266	5.8	0.7	12841	506	35.8	1.2	11227	501	31.3	1.2	4933	328	13.7
0500000US54109	54109	Wyoming County, West Virginia	9201	219	9201	(X)	6448	333	70.1	3	2510	295	27.3	2.9	5092	311	55.3	3.1	1843	251	20	2.6	461	136	5	1.5	177	82	1.9	0.9	895	184	9.7	2	490	130	5.3	1.4	2753	272	29.9	3	2459	251	26.7	2.7	1081	169	11.7
[truncated: 561 more columns]
