# Supplementary material for: Evaluation of Policy Effectiveness by Mathematical Modeling for the Opioid Crisis with Spatial Study and Trend Analysis
Source: Healthcare (Basel). 2021 May 14;9(5):585. doi: 10.3390/healthcare9050585 (PMC8155830; doi:10.3390/healthcare9050585)
Supplement: Supplementary file 1 [file healthcare-09-00585-s001.zip › Table S7.xlsx]

## Sheet: Table S7
GEO.id	GEO.id2	GEO.display-label	HC01_VC03	HC02_VC03	HC03_VC03	HC04_VC03	HC01_VC04	HC02_VC04	HC03_VC04	HC04_VC04	HC01_VC05	HC02_VC05	HC03_VC05	HC04_VC05	HC01_VC06	HC02_VC06	HC03_VC06	HC04_VC06	HC01_VC07	HC02_VC07	HC03_VC07	HC04_VC07	HC01_VC08	HC02_VC08	HC03_VC08	HC04_VC08	HC01_VC09	HC02_VC09	HC03_VC09	HC04_VC09	HC01_VC10	HC02_VC10	HC03_VC10	HC04_VC10	HC01_VC11	HC02_VC11	HC03_VC11	HC04_VC11	HC01_VC12	HC02_VC12	HC03_VC12	HC04_VC12	HC01_VC13	HC02_VC13	HC03_VC13	HC04_VC13	HC01_VC14	HC02_VC14	HC03_VC14
Id	Id2	Geography	Estimate; HOUSEHOLDS BY TYPE - Total households	Margin of Error; HOUSEHOLDS BY TYPE - Total households	Percent; HOUSEHOLDS BY TYPE - Total households	Percent Margin of Error; HOUSEHOLDS BY TYPE - Total households	Estimate; HOUSEHOLDS BY TYPE - Total households - Family households (families)	Margin of Error; HOUSEHOLDS BY TYPE - Total households - Family households (families)	Percent; HOUSEHOLDS BY TYPE - Total households - Family households (families)	Percent Margin of Error; HOUSEHOLDS BY TYPE - Total households - Family households (families)	Estimate; HOUSEHOLDS BY TYPE - Total households - Family households (families) - With own children of the householder under 18 years	Margin of Error; HOUSEHOLDS BY TYPE - Total households - Family households (families) - With own children of the householder under 18 years	Percent; HOUSEHOLDS BY TYPE - Total households - Family households (families) - With own children of the householder under 18 years	Percent Margin of Error; HOUSEHOLDS BY TYPE - Total households - Family households (families) - With own children of the householder under 18 years	Estimate; HOUSEHOLDS BY TYPE - Total households - Family households (families) - Married-couple family	Margin of Error; HOUSEHOLDS BY TYPE - Total households - Family households (families) - Married-couple family	Percent; HOUSEHOLDS BY TYPE - Total households - Family households (families) - Married-couple family	Percent Margin of Error; HOUSEHOLDS BY TYPE - Total households - Family households (families) - Married-couple family	Estimate; HOUSEHOLDS BY TYPE - Total households - Family households (families) - Married-couple family - With own children of the householder under 18 years	Margin of Error; HOUSEHOLDS BY TYPE - Total households - Family households (families) - Married-couple family - With own children of the householder under 18 years	Percent; HOUSEHOLDS BY TYPE - Total households - Family households (families) - Married-couple family - With own children of the householder under 18 years	Percent Margin of Error; HOUSEHOLDS BY TYPE - Total households - Family households (families) - Married-couple family - With own children of the householder under 18 years	Estimate; HOUSEHOLDS BY TYPE - Total households - Family households (families) - Male householder, no wife present, family	Margin of Error; HOUSEHOLDS BY TYPE - Total households - Family households (families) - Male householder, no wife present, family	Percent; HOUSEHOLDS BY TYPE - Total households - Family households (families) - Male householder, no wife present, family	Percent Margin of Error; HOUSEHOLDS BY TYPE - Total households - Family households (families) - Male householder, no wife present, family	Estimate; HOUSEHOLDS BY TYPE - Total households - Family households (families) - Male householder, no wife present, family - With own children of the householder under 18 years	Margin of Error; HOUSEHOLDS BY TYPE - Total households - Family households (families) - Male householder, no wife present, family - With own children of the householder under 18 years	Percent; HOUSEHOLDS BY TYPE - Total households - Family households (families) - Male householder, no wife present, family - With own children of the householder under 18 years	Percent Margin of Error; HOUSEHOLDS BY TYPE - Total households - Family households (families) - Male householder, no wife present, family - With own children of the householder under 18 years	Estimate; HOUSEHOLDS BY TYPE - Total households - Family households (families) - Female householder, no husband present, family	Margin of Error; HOUSEHOLDS BY TYPE - Total households - Family households (families) - Female householder, no husband present, family	Percent; HOUSEHOLDS BY TYPE - Total households - Family households (families) - Female householder, no husband present, family	Percent Margin of Error; HOUSEHOLDS BY TYPE - Total households - Family households (families) - Female householder, no husband present, family	Estimate; HOUSEHOLDS BY TYPE - Total households - Family households (families) - Female householder, no husband present, family - With own children of the householder under 18 years	Margin of Error; HOUSEHOLDS BY TYPE - Total households - Family households (families) - Female householder, no husband present, family - With own children of the householder under 18 years	Percent; HOUSEHOLDS BY TYPE - Total households - Family households (families) - Female householder, no husband present, family - With own children of the householder under 18 years	Percent Margin of Error; HOUSEHOLDS BY TYPE - Total households - Family households (families) - Female householder, no husband present, family - With own children of the householder under 18 years	Estimate; HOUSEHOLDS BY TYPE - Total households - Nonfamily households	Margin of Error; HOUSEHOLDS BY TYPE - Total households - Nonfamily households	Percent; HOUSEHOLDS BY TYPE - Total households - Nonfamily households	Percent Margin of Error; HOUSEHOLDS BY TYPE - Total households - Nonfamily households	Estimate; HOUSEHOLDS BY TYPE - Total households - Nonfamily households - Householder living alone	Margin of Error; HOUSEHOLDS BY TYPE - Total households - Nonfamily households - Householder living alone	Percent; HOUSEHOLDS BY TYPE - Total households - Nonfamily households - Householder living alone	Percent Margin of Error; HOUSEHOLDS BY TYPE - Total households - Nonfamily households - Householder living alone	Estimate; HOUSEHOLDS BY TYPE - Total households - Nonfamily households - Householder living alone - 65 years and over	Margin of Error; HOUSEHOLDS BY TYPE - Total households - Nonfamily households - Householder living alone - 65 years and over	Percent; HOUSEHOLDS BY TYPE - Total households - Nonfamily households - Householder living alone - 65 years and over
0500000US21001	21001	Adair County, Kentucky	7048	215	7048	(X)	4707	234	66.8	3	1690	169	24	2.2	3741	234	53.1	3.2	1258	160	17.8	2.2	263	93	3.7	1.3	120	60	1.7	0.8	703	153	10	2.2	312	104	4.4	1.4	2341	235	33.2	3	2104	230	29.9	3	967	173	13.7
0500000US21003	21003	Allen County, Kentucky	7774	253	7774	(X)	5507	278	70.8	3.1	2453	194	31.6	2.2	4464	281	57.4	3.4	1870	208	24.1	2.6	313	114	4	1.5	199	102	2.6	1.3	730	162	9.4	2.1	384	140	4.9	1.8	2267	264	29.2	3.1	2003	250	25.8	3	931	155	12
0500000US21005	21005	Anderson County, Kentucky	8446	272	8446	(X)	6015	277	71.2	2.9	2654	265	31.4	2.8	4760	266	56.4	3.3	1902	201	22.5	2.3	332	127	3.9	1.5	203	115	2.4	1.4	923	231	10.9	2.6	549	199	6.5	2.3	2431	277	28.8	2.9	1964	231	23.3	2.5	891	161	10.5
0500000US21007	21007	Ballard County, Kentucky	3288	104	3288	(X)	2180	121	66.3	3.3	772	92	23.5	2.6	1766	114	53.7	3.3	546	80	16.6	2.3	103	39	3.1	1.2	24	17	0.7	0.5	311	72	9.5	2.1	202	62	6.1	1.9	1108	117	33.7	3.3	984	113	29.9	3.2	491	86	14.9
0500000US21009	21009	Barren County, Kentucky	16979	384	16979	(X)	11755	411	69.2	2.2	4993	302	29.4	1.7	9004	400	53	2.2	3280	283	19.3	1.7	717	198	4.2	1.2	394	158	2.3	0.9	2034	263	12	1.5	1319	230	7.8	1.3	5224	410	30.8	2.2	4840	406	28.5	2.2	2185	273	12.9
0500000US21011	21011	Bath County, Kentucky	4297	254	4297	(X)	2950	283	68.7	4.7	1168	192	27.2	3.7	2238	226	52.1	4.6	795	137	18.5	2.8	211	83	4.9	1.9	128	76	3	1.7	501	126	11.7	2.7	245	81	5.7	1.8	1347	211	31.3	4.7	1133	184	26.4	4.1	580	111	13.5
0500000US21013	21013	Bell County, Kentucky	11088	396	11088	(X)	7049	356	63.6	2.9	2848	248	25.7	2.1	4666	342	42.1	3.1	1758	230	15.9	2	541	119	4.9	1.1	181	76	1.6	0.7	1842	223	16.6	1.9	909	177	8.2	1.6	4039	376	36.4	2.9	3539	340	31.9	2.6	1590	222	14.3
0500000US21015	21015	Boone County, Kentucky	44709	515	44709	(X)	33557	601	75.1	1.4	16407	615	36.7	1.4	26190	678	58.6	1.5	12004	568	26.8	1.3	2218	380	5	0.9	1371	308	3.1	0.7	5149	519	11.5	1.2	3032	417	6.8	0.9	11152	669	24.9	1.4	9164	649	20.5	1.3	3136	294	7
0500000US21017	21017	Bourbon County, Kentucky	7867	246	7867	(X)	5281	222	67.1	3	2332	202	29.6	2.4	3815	223	48.5	3.3	1547	185	19.7	2.4	390	115	5	1.4	128	60	1.6	0.8	1076	182	13.7	2.2	657	150	8.4	1.8	2586	281	32.9	3	2122	247	27	2.7	845	162	10.7
0500000US21019	21019	Boyd County, Kentucky	19383	320	19383	(X)	13170	367	67.9	1.8	4981	359	25.7	1.8	9780	395	50.5	2	3235	325	16.7	1.6	1067	257	5.5	1.3	481	183	2.5	0.9	2323	250	12	1.3	1265	188	6.5	1	6213	396	32.1	1.8	5315	359	27.4	1.7	2352	185	12.1
0500000US21021	21021	Boyle County, Kentucky	11045	300	11045	(X)	7107	313	64.3	2.8	2618	212	23.7	1.8	5530	267	50.1	2.6	1788	159	16.2	1.4	391	103	3.5	0.9	157	74	1.4	0.7	1186	198	10.7	1.8	673	152	6.1	1.4	3938	353	35.7	2.8	3435	319	31.1	2.6	1393	192	12.6
0500000US21023	21023	Bracken County, Kentucky	3303	123	3303	(X)	2147	129	65	3.3	908	93	27.5	2.5	1648	130	49.9	3.7	652	96	19.7	2.8	147	54	4.5	1.6	56	35	1.7	1	352	76	10.7	2.2	200	60	6.1	1.8	1156	123	35	3.3	979	121	29.6	3.4	474	88	14.4
0500000US21025	21025	Breathitt County, Kentucky	5494	151	5494	(X)	3688	184	67.1	3.1	1368	140	24.9	2.4	2470	201	45	3.6	874	141	15.9	2.6	323	91	5.9	1.7	95	49	1.7	0.9	895	141	16.3	2.5	399	90	7.3	1.6	1806	182	32.9	3.1	1658	160	30.2	2.7	570	80	10.4
0500000US21027	21027	Breckinridge County, Kentucky	7297	263	7297	(X)	5212	259	71.4	2.7	1752	180	24	2.1	4293	247	58.8	2.9	1313	153	18	1.9	321	122	4.4	1.6	144	70	2	0.9	598	133	8.2	1.9	295	93	4	1.3	2085	216	28.6	2.7	1724	198	23.6	2.5	742	117	10.2
0500000US21029	21029	Bullitt County, Kentucky	28267	403	28267	(X)	21024	550	74.4	1.7	8328	432	29.5	1.4	15849	525	56.1	1.7	5492	387	19.4	1.3	1674	280	5.9	1	843	196	3	0.7	3501	354	12.4	1.2	1993	275	7.1	0.9	7243	503	25.6	1.7	5894	462	20.9	1.6	2279	257	8.1
0500000US21031	21031	Butler County, Kentucky	5176	163	5176	(X)	3568	199	68.9	3.4	1521	155	29.4	2.9	2732	222	52.8	3.9	1039	160	20.1	3	263	103	5.1	2	124	70	2.4	1.3	573	128	11.1	2.5	358	121	6.9	2.4	1608	189	31.1	3.4	1457	183	28.1	3.3	579	117	11.2
0500000US21033	21033	Caldwell County, Kentucky	5293	243	5293	(X)	3665	294	69.2	5.2	1180	227	22.3	4	2652	247	50.1	4.4	652	139	12.3	2.4	232	95	4.4	1.8	73	64	1.4	1.2	781	195	14.8	3.6	455	174	8.6	3.2	1628	298	30.8	5.2	1438	280	27.2	5	719	167	13.6
0500000US21035	21035	Calloway County, Kentucky	14834	550	14834	(X)	8561	411	57.7	2.4	3414	314	23	2	6671	366	45	2.5	2391	256	16.1	1.7	536	169	3.6	1.1	313	150	2.1	1	1354	220	9.1	1.4	710	185	4.8	1.2	6273	467	42.3	2.4	5073	441	34.2	2.4	1829	212	12.3
0500000US21037	21037	Campbell County, Kentucky	35477	514	35477	(X)	22485	579	63.4	1.5	9563	356	27	0.9	16590	624	46.8	1.7	6521	394	18.4	1.1	1662	277	4.7	0.8	778	192	2.2	0.5	4233	377	11.9	1.1	2264	273	6.4	0.8	12992	612	36.6	1.5	10485	626	29.6	1.6	3680	321	10.4
0500000US21039	21039	Carlisle County, Kentucky	2059	98	2059	(X)	1405	107	68.2	3.9	493	64	23.9	3	1124	96	54.6	4	371	57	18	2.7	126	37	6.1	1.7	52	27	2.5	1.3	155	50	7.5	2.4	70	41	3.4	2	654	85	31.8	3.9	597	82	29	3.8	294	65	14.3
0500000US21041	21041	Carroll County, Kentucky	3988	149	3988	(X)	2518	201	63.1	4.8	1044	136	26.2	3	1824	180	45.7	4.9	625	104	15.7	2.6	351	111	8.8	2.7	199	82	5	2	343	87	8.6	2.1	220	74	5.5	1.8	1470	204	36.9	4.8	1225	194	30.7	4.6	373	104	9.4
0500000US21043	21043	Carter County, Kentucky	10487	271	10487	(X)	7267	303	69.3	2.6	2530	260	24.1	2.3	5518	323	52.6	3.1	1848	195	17.6	1.7	433	134	4.1	1.3	155	61	1.5	0.6	1316	271	12.5	2.6	527	183	5	1.7	3220	304	30.7	2.6	2815	301	26.8	2.6	1327	217	12.7
0500000US21045	21045	Casey County, Kentucky	6384	202	6384	(X)	4420	257	69.2	3.4	1688	165	26.4	2.3	3559	276	55.7	4.2	1294	160	20.3	2.4	317	103	5	1.6	124	62	1.9	1	544	124	8.5	1.9	270	101	4.2	1.6	1964	228	30.8	3.4	1846	217	28.9	3.3	830	134	13
0500000US21047	21047	Christian County, Kentucky	25521	451	25521	(X)	18035	566	70.7	1.8	9316	493	36.5	1.7	13184	539	51.7	1.9	6580	445	25.8	1.6	1156	239	4.5	0.9	508	160	2	0.6	3695	330	14.5	1.3	2228	274	8.7	1	7486	464	29.3	1.8	6540	470	25.6	1.8	2475	222	9.7
0500000US21049	21049	Clark County, Kentucky	14173	290	14173	(X)	9634	290	68	2.3	3709	254	26.2	1.7	7140	303	50.4	2.3	2374	235	16.8	1.6	779	187	5.5	1.3	328	125	2.3	0.9	1715	215	12.1	1.5	1007	178	7.1	1.2	4539	375	32	2.3	3464	312	24.4	2	1482	173	10.5
0500000US21051	21051	Clay County, Kentucky	7707	220	7707	(X)	5377	265	69.8	3.1	2070	190	26.9	2.3	3670	275	47.6	3.6	1398	208	18.1	2.7	449	126	5.8	1.6	152	73	2	0.9	1258	185	16.3	2.3	520	136	6.7	1.7	2330	258	30.2	3.1	2195	256	28.5	3.1	849	126	11
0500000US21053	21053	Clinton County, Kentucky	3858	216	3858	(X)	2571	203	66.6	4.1	1118	139	29	2.9	1966	195	51	4.6	728	130	18.9	3.1	249	89	6.5	2.3	160	75	4.1	1.9	356	103	9.2	2.6	230	94	6	2.4	1287	183	33.4	4.1	1237	180	32.1	4.1	589	114	15.3
0500000US21055	21055	Crittenden County, Kentucky	3755	163	3755	(X)	2506	161	66.7	4	865	118	23	2.9	2047	155	54.5	3.9	707	117	18.8	2.9	133	58	3.5	1.6	35	33	0.9	0.9	326	88	8.7	2.3	123	57	3.3	1.5	1249	173	33.3	4	1120	172	29.8	4.2	514	108	13.7
0500000US21057	21057	Cumberland County, Kentucky	2743	178	2743	(X)	1918	180	69.9	4.5	651	117	23.7	3.7	1363	179	49.7	5.6	391	101	14.3	3.4	208	82	7.6	2.8	58	46	2.1	1.6	347	92	12.7	3.3	202	79	7.4	2.8	825	131	30.1	4.5	758	125	27.6	4.2	315	78	11.5
0500000US21059	21059	Daviess County, Kentucky	38536	554	38536	(X)	26028	531	67.5	1.3	11067	520	28.7	1.3	19695	601	51.1	1.6	7352	426	19.1	1.1	1711	275	4.4	0.7	912	219	2.4	0.6	4622	405	12	1	2803	351	7.3	0.9	12508	569	32.5	1.3	10603	544	27.5	1.3	4240	314	11
0500000US21061	21061	Edmonson County, Kentucky	4659	249	4659	(X)	3351	242	71.9	3.7	1213	162	26	2.9	2734	257	58.7	4.7	1020	148	21.9	2.9	172	80	3.7	1.7	24	30	0.5	0.6	445	141	9.6	3	169	96	3.6	2	1308	192	28.1	3.7	1136	172	24.4	3.4	534	107	11.5
0500000US21063	21063	Elliott County, Kentucky	2750	132	2750	(X)	1967	152	71.5	5.4	795	134	28.9	4.2	1352	165	49.2	6.2	503	126	18.3	4.3	233	96	8.5	3.5	79	64	2.9	2.3	382	95	13.9	3.4	213	68	7.7	2.5	783	162	28.5	5.4	617	131	22.4	4.4	354	89	12.9
0500000US21065	21065	Estill County, Kentucky	5750	239	5750	(X)	4004	253	69.6	3.5	1509	201	26.2	3	2848	204	49.5	3.7	919	157	16	2.7	174	72	3	1.2	67	48	1.2	0.8	982	220	17.1	3.6	523	174	9.1	2.9	1746	218	30.4	3.5	1531	206	26.6	3.3	674	136	11.7
0500000US21067	21067	Fayette County, Kentucky	125752	901	125752	(X)	72466	1078	57.6	0.8	33283	884	26.5	0.7	51368	961	40.8	0.7	21319	712	17	0.6	5530	564	4.4	0.4	2915	406	2.3	0.3	15568	846	12.4	0.7	9049	665	7.2	0.5	53286	1177	42.4	0.8	40437	1072	32.2	0.8	10246	489	8.1
0500000US21069	21069	Fleming County, Kentucky	5636	180	5636	(X)	3982	198	70.7	2.9	1582	169	28.1	2.8	3065	187	54.4	3.4	1154	132	20.5	2.4	270	89	4.8	1.6	104	59	1.8	1	647	139	11.5	2.3	324	97	5.7	1.6	1654	176	29.3	2.9	1473	169	26.1	2.8	656	118	11.6
0500000US21071	21071	Floyd County, Kentucky	15418	371	15418	(X)	10642	396	69	2.2	4018	363	26.1	2.2	7444	458	48.3	2.6	2662	329	17.3	2	995	196	6.5	1.3	412	152	2.7	1	2203	295	14.3	2	944	176	6.1	1.2	4776	376	31	2.2	4297	362	27.9	2.2	1627	239	10.6
0500000US21073	21073	Franklin County, Kentucky	21033	443	21033	(X)	12780	457	60.8	2.2	5328	391	25.3	1.9	9009	407	42.8	2	3157	333	15	1.6	1024	253	4.9	1.2	484	171	2.3	0.8	2747	324	13.1	1.5	1687	307	8	1.4	8253	541	39.2	2.2	7134	451	33.9	1.8	2207	279	10.5
0500000US21075	21075	Fulton County, Kentucky	2568	150	2568	(X)	1595	130	62.1	3.9	635	98	24.7	3.2	1167	119	45.4	4.3	373	77	14.5	2.8	82	40	3.2	1.5	60	38	2.3	1.5	346	84	13.5	3.1	202	67	7.9	2.5	973	120	37.9	3.9	915	121	35.6	4	343	76	13.4
0500000US21077	21077	Gallatin County, Kentucky	3097	120	3097	(X)	2099	138	67.8	4.3	941	131	30.4	4.3	1510	142	48.8	4.5	637	101	20.6	3.4	196	72	6.3	2.3	124	67	4	2.2	393	98	12.7	3.2	180	66	5.8	2.1	998	149	32.2	4.3	874	141	28.2	4.2	225	66	7.3
0500000US21079	21079	Garrard County, Kentucky	6594	204	6594	(X)	5080	251	77	3	1956	184	29.7	2.5	3922	240	59.5	3.5	1325	171	20.1	2.6	282	109	4.3	1.6	170	88	2.6	1.3	876	195	13.3	2.9	461	162	7	2.4	1514	207	23	3	1363	188	20.7	2.8	615	118	9.3
0500000US21081	21081	Grant County, Kentucky	8325	287	8325	(X)	6340	347	76.2	3.4	2791	271	33.5	2.8	4730	326	56.8	3.7	1807	236	21.7	2.7	496	177	6	2.1	266	121	3.2	1.5	1114	236	13.4	2.7	718	195	8.6	2.2	1985	296	23.8	3.4	1590	257	19.1	3	656	139	7.9
0500000US21083	21083	Graves County, Kentucky	14390	335	14390	(X)	9881	368	68.7	2	4067	263	28.3	1.6	7734	349	53.7	2.3	2789	240	19.4	1.6	476	132	3.3	0.9	284	114	2	0.8	1671	236	11.6	1.6	994	163	6.9	1.1	4509	308	31.3	2	4154	316	28.9	2	1708	207	11.9
0500000US21085	21085	Grayson County, Kentucky	9840	294	9840	(X)	6910	279	70.2	2.6	2820	286	28.7	2.7	5533	348	56.2	3.4	2168	292	22	2.9	453	132	4.6	1.3	196	75	2	0.8	924	200	9.4	2	456	165	4.6	1.7	2930	290	29.8	2.6	2662	290	27.1	2.6	1139	177	11.6
0500000US21087	21087	Green County, Kentucky	4477	170	4477	(X)	3088	205	69	3.6	1236	127	27.6	2.4	2497	184	55.8	3.6	940	102	21	2.1	112	53	2.5	1.2	46	30	1	0.7	479	105	10.7	2.2	250	81	5.6	1.8	1389	166	31	3.6	1254	154	28	3.3	745	134	16.6
0500000US21089	21089	Greenup County, Kentucky	14200	280	14200	(X)	10271	334	72.3	1.9	3765	265	26.5	1.7	7940	356	55.9	2.3	2750	242	19.4	1.6	825	166	5.8	1.2	357	106	2.5	0.7	1506	189	10.6	1.3	658	116	4.6	0.8	3929	286	27.7	1.9	3366	267	23.7	1.8	1685	165	11.9
0500000US21091	21091	Hancock County, Kentucky	3265	119	3265	(X)	2476	125	75.8	2.9	1032	110	31.6	2.9	1881	131	57.6	3.7	685	90	21	2.6	144	54	4.4	1.6	80	40	2.5	1.2	451	82	13.8	2.4	267	79	8.2	2.3	789	101	24.2	2.9	730	97	22.4	2.8	241	61	7.4
0500000US21093	21093	Hardin County, Kentucky	40376	579	40376	(X)	27966	660	69.3	1.5	13104	510	32.5	1.2	20704	585	51.3	1.5	8602	459	21.3	1.2	1797	278	4.5	0.7	1036	231	2.6	0.6	5465	459	13.5	1.1	3466	416	8.6	1	12410	648	30.7	1.5	10776	629	26.7	1.5	3503	337	8.7
0500000US21095	21095	Harlan County, Kentucky	11406	232	11406	(X)	7903	313	69.3	2.4	2866	250	25.1	2	5605	285	49.1	2.6	2101	206	18.4	1.7	671	150	5.9	1.3	100	39	0.9	0.3	1627	213	14.3	1.8	665	136	5.8	1.2	3503	287	30.7	2.4	3160	274	27.7	2.3	1515	207	13.3
0500000US21097	21097	Harrison County, Kentucky	7120	245	7120	(X)	4650	254	65.3	3.4	1869	214	26.3	2.9	3435	239	48.2	3.3	1093	164	15.4	2.3	288	110	4	1.5	187	103	2.6	1.4	927	194	13	2.7	589	164	8.3	2.3	2470	276	34.7	3.4	2146	252	30.1	3.2	872	144	12.2
0500000US21099	21099	Hart County, Kentucky	7294	229	7294	(X)	5233	233	71.7	2.2	2188	195	30	2.2	4052	258	55.6	3.2	1480	171	20.3	2.2	293	96	4	1.3	187	81	2.6	1.1	888	163	12.2	2.2	521	136	7.1	1.8	2061	168	28.3	2.2	1809	168	24.8	2.3	780	104	10.7
0500000US21101	21101	Henderson County, Kentucky	18742	409	18742	(X)	12505	445	66.7	2	4950	331	26.4	1.6	8953	435	47.8	2.2	2953	246	15.8	1.3	1089	231	5.8	1.2	536	155	2.9	0.8	2463	306	13.1	1.6	1461	269	7.8	1.4	6237	405	33.3	2	5537	417	29.5	2.1	2111	239	11.3
0500000US21103	21103	Henry County, Kentucky	5992	148	5992	(X)	4312	223	72	3.4	1633	167	27.3	2.7	3176	221	53	3.7	1055	158	17.6	2.6	331	103	5.5	1.7	183	79	3.1	1.3	805	117	13.4	1.9	395	96	6.6	1.6	1680	214	28	3.4	1464	200	24.4	3.2	692	105	11.5
0500000US21105	21105	Hickman County, Kentucky	1973	115	1973	(X)	1270	121	64.4	5.9	405	90	20.5	4.6	980	124	49.7	6.3	266	76	13.5	3.8	31	21	1.6	1	11	12	0.6	0.6	259	70	13.1	3.5	128	43	6.5	2.2	703	132	35.6	5.9	596	132	30.2	6.2	354	103	17.9
0500000US21107	21107	Hopkins County, Kentucky	18622	363	18622	(X)	12659	422	68	1.8	5065	334	27.2	1.6	9618	383	51.6	2	3366	254	18.1	1.3	512	120	2.7	0.6	201	69	1.1	0.4	2529	360	13.6	1.9	1498	279	8	1.5	5963	362	32	1.8	5291	362	28.4	1.9	2145	233	11.5
0500000US21109	21109	Jackson County, Kentucky	5546	195	5546	(X)	4173	280	75.2	4.5	1618	242	29.2	4	3078	288	55.5	4.9	1057	253	19.1	4.4	311	133	5.6	2.4	194	122	3.5	2.2	784	185	14.1	3.3	367	136	6.6	2.5	1373	255	24.8	4.5	1226	242	22.1	4.2	411	141	7.4
0500000US21111	21111	Jefferson County, Kentucky	306915	1724	306915	(X)	185758	1900	60.5	0.6	79025	1202	25.7	0.4	125226	1586	40.8	0.5	46964	1033	15.3	0.3	15175	800	4.9	0.3	6944	592	2.3	0.2	45357	1233	14.8	0.4	25117	945	8.2	0.3	121157	1893	39.5	0.6	100998	1806	32.9	0.5	33301	880	10.9
0500000US21113	21113	Jessamine County, Kentucky	18312	347	18312	(X)	13913	398	76	1.7	6302	336	34.4	1.7	10564	438	57.7	2.4	4204	336	23	1.8	866	219	4.7	1.2	556	177	3	1	2483	349	13.6	1.9	1542	289	8.4	1.6	4399	337	24	1.7	3511	312	19.2	1.7	1217	177	6.6
0500000US21115	21115	Johnson County, Kentucky	9035	259	9035	(X)	6376	356	70.6	3.4	2418	262	26.8	2.6	5137	324	56.9	3.4	1824	242	20.2	2.6	406	120	4.5	1.3	188	97	2.1	1.1	833	185	9.2	2	406	129	4.5	1.4	2659	322	29.4	3.4	2353	329	26	3.5	872	195	9.7
0500000US21117	21117	Kenton County, Kentucky	62225	730	62225	(X)	40301	842	64.8	1.1	18192	649	29.2	0.9	28443	830	45.7	1.2	11231	559	18	0.8	3189	361	5.1	0.6	1929	315	3.1	0.5	8669	500	13.9	0.8	5032	395	8.1	0.6	21924	706	35.2	1.1	17880	630	28.7	1	5919	352	9.5
0500000US21119	21119	Knott County, Kentucky	5984	248	5984	(X)	4122	257	68.9	3.4	1508	157	25.2	2.3	3063	250	51.2	4	999	135	16.7	2.3	255	82	4.3	1.4	68	39	1.1	0.7	804	152	13.4	2.4	441	110	7.4	1.7	1862	224	31.1	3.4	1610	213	26.9	3.3	563	110	9.4
0500000US21121	21121	Knox County, Kentucky	12467	358	12467	(X)	8138	467	65.3	3.5	3089	315	24.8	2.4	5689	444	45.6	3.5	1792	240	14.4	1.8	678	218	5.4	1.7	356	148	2.9	1.2	1771	293	14.2	2.3	941	227	7.5	1.8	4329	468	34.7	3.5	3925	432	31.5	3.3	1695	234	13.6
0500000US21123	21123	Larue County, Kentucky	5328	248	5328	(X)	3744	257	70.3	3.5	1451	194	27.2	3.1	2768	254	52	4	853	173	16	3	274	95	5.1	1.8	137	68	2.6	1.3	702	152	13.2	2.7	461	117	8.7	2.2	1584	202	29.7	3.5	1326	175	24.9	3.2	632	144	11.9
0500000US21125	21125	Laurel County, Kentucky	23164	393	23164	(X)	16195	526	69.9	2	6624	446	28.6	1.8	11961	488	51.6	2.2	4429	380	19.1	1.6	1256	273	5.4	1.2	547	203	2.4	0.9	2978	417	12.9	1.7	1648	339	7.1	1.4	6969	469	30.1	2	5902	439	25.5	1.8	2172	275	9.4
0500000US21127	21127	Lawrence County, Kentucky	6033	178	6033	(X)	4400	237	72.9	2.9	1548	137	25.7	1.9	3431	237	56.9	3.4	1218	125	20.2	1.9	272	89	4.5	1.5	97	52	1.6	0.9	697	122	11.6	1.9	233	101	3.9	1.6	1633	172	27.1	2.9	1471	172	24.4	2.9	772	131	12.8
0500000US21129	21129	Lee County, Kentucky	2859	154	2859	(X)	1653	203	57.8	5.6	542	116	19	3.7	1205	156	42.1	4.8	398	100	13.9	3.3	143	75	5	2.5	16	26	0.6	0.9	305	88	10.7	3	128	67	4.5	2.3	1206	158	42.2	5.6	1100	157	38.5	5.7	385	70	13.5
0500000US21131	21131	Leslie County, Kentucky	4150	239	4150	(X)	2873	248	69.2	4.8	1024	212	24.7	4.5	2021	224	48.7	4.8	728	176	17.5	3.9	248	85	6	2	95	68	2.3	1.6	604	137	14.6	3.3	201	103	4.8	2.4	1277	216	30.8	4.8	1159	209	27.9	4.7	540	123	13
0500000US21133	21133	Letcher County, Kentucky	9592	345	9592	(X)	6694	373	69.8	3.4	2246	213	23.4	1.9	5017	384	52.3	3.8	1546	221	16.1	2.1	376	132	3.9	1.4	169	93	1.8	1	1301	235	13.6	2.4	531	150	5.5	1.6	2898	362	30.2	3.4	2611	339	27.2	3.2	1199	188	12.5
0500000US21135	21135	Lewis County, Kentucky	5373	198	5373	(X)	3876	242	72.1	3.4	1534	161	28.6	2.8	2890	251	53.8	3.9	999	157	18.6	2.7	335	94	6.2	1.7	182	78	3.4	1.4	651	139	12.1	2.6	353	109	6.6	2	1497	189	27.9	3.4	1327	181	24.7	3.3	547	110	10.2
0500000US21137	21137	Lincoln County, Kentucky	9770	268	9770	(X)	7154	329	73.2	2.6	3007	275	30.8	2.5	5085	317	52	3.1	1923	276	19.7	2.8	655	172	6.7	1.8	349	147	3.6	1.5	1414	224	14.5	2.2	735	188	7.5	1.9	2616	263	26.8	2.6	2311	241	23.7	2.4	1247	173	12.8
0500000US21139	21139	Livingston County, Kentucky	3826	179	3826	(X)	2769	205	72.4	4	751	148	19.6	3.7	2287	208	59.8	4.5	484	123	12.7	3.1	87	55	2.3	1.5	44	39	1.2	1	395	115	10.3	3	223	93	5.8	2.4	1057	159	27.6	4	903	164	23.6	4.3	479	89	12.5
0500000US21141	21141	Logan County, Kentucky	10870	277	10870	(X)	7217	370	66.4	3.2	2654	290	24.4	2.6	5279	345	48.6	3.2	1681	243	15.5	2.2	629	186	5.8	1.7	300	129	2.8	1.2	1309	211	12	2	673	165	6.2	1.5	3653	366	33.6	3.2	3179	385	29.2	3.3	1360	212	12.5
0500000US21143	21143	Lyon County, Kentucky	3230	236	3230	(X)	1959	199	60.7	4.6	500	121	15.5	3.3	1604	204	49.7	5.2	340	102	10.5	2.9	102	52	3.2	1.6	38	37	1.2	1.1	253	85	7.8	2.6	122	59	3.8	1.8	1271	180	39.3	4.6	1095	170	33.9	4.5	372	80	11.5
0500000US21145	21145	McCracken County, Kentucky	27514	492	27514	(X)	17027	477	61.9	1.7	6714	389	24.4	1.3	12424	520	45.2	2	3968	308	14.4	1.1	913	195	3.3	0.7	520	152	1.9	0.6	3690	404	13.4	1.4	2226	298	8.1	1.1	10487	542	38.1	1.7	9330	501	33.9	1.6	3495	326	12.7
0500000US21147	21147	McCreary County, Kentucky	6277	312	6277	(X)	4544	326	72.4	3.7	1721	237	27.4	3.3	3208	349	51.1	5	1309	212	20.9	3.1	585	172	9.3	2.7	114	50	1.8	0.8	751	199	12	3.1	298	118	4.7	1.8	1733	243	27.6	3.7	1614	243	25.7	3.7	456	149	7.3
0500000US21149	21149	McLean County, Kentucky	3759	129	3759	(X)	2709	141	72.1	3.5	1035	109	27.5	2.7	2175	142	57.9	3.8	666	91	17.7	2.4	223	76	5.9	2	164	69	4.4	1.8	311	72	8.3	1.9	205	62	5.5	1.6	1050	143	27.9	3.5	925	138	24.6	3.5	405	90	10.8
0500000US21151	21151	Madison County, Kentucky	32064	420	32064	(X)	20290	571	63.3	1.8	8753	422	27.3	1.3	15133	613	47.2	1.9	6119	401	19.1	1.3	1402	246	4.4	0.8	694	180	2.2	0.6	3755	410	11.7	1.2	1940	268	6.1	0.8	11774	622	36.7	1.8	8949	563	27.9	1.7	2915	297	9.1
0500000US21153	21153	Magoffin County, Kentucky	4996	178	4996	(X)	3481	261	69.7	4.3	1410	177	28.2	3.3	2657	270	53.2	4.9	958	164	19.2	3.2	164	69	3.3	1.4	75	64	1.5	1.3	660	138	13.2	2.6	377	92	7.5	1.7	1515	213	30.3	4.3	1435	213	28.7	4.2	505	107	10.1
0500000US21155	21155	Marion County, Kentucky	7395	188	7395	(X)	4906	252	66.3	3.4	2224	170	30.1	2.2	3688	246	49.9	3.5	1468	170	19.9	2.3	366	106	4.9	1.4	215	92	2.9	1.2	852	163	11.5	2.2	541	140	7.3	1.9	2489	269	33.7	3.4	2182	255	29.5	3.2	863	137	11.7
0500000US21157	21157	Marshall County, Kentucky	12602	368	12602	(X)	8925	378	70.8	2.7	3090	282	24.5	2.1	7202	343	57.1	2.7	2192	261	17.4	2	603	175	4.8	1.4	318	133	2.5	1	1120	213	8.9	1.7	580	154	4.6	1.2	3677	375	29.2	2.7	3255	335	25.8	2.4	1452	218	11.5
0500000US21159	21159	Martin County, Kentucky	4320	294	4320	(X)	3105	328	71.9	5.3	1304	246	30.2	4.9	2276	311	52.7	6	837	183	19.4	3.9	263	132	6.1	2.9	188	125	4.4	2.8	566	131	13.1	3	279	119	6.5	2.7	1215	233	28.1	5.3	1050	225	24.3	5.2	428	119	9.9
0500000US21161	21161	Mason County, Kentucky	6736	207	6736	(X)	4758	215	70.6	3	1848	178	27.4	2.5	3501	216	52	3	1225	171	18.2	2.4	320	99	4.8	1.5	144	78	2.1	1.2	937	144	13.9	2.1	479	120	7.1	1.8	1978	226	29.4	3	1766	209	26.2	2.8	624	121	9.3
0500000US21163	21163	Meade County, Kentucky	10574	244	10574	(X)	8007	345	75.7	2.7	3532	257	33.4	2.2	6267	342	59.3	3.1	2550	247	24.1	2.2	681	163	6.4	1.5	332	140	3.1	1.3	1059	159	10	1.5	650	139	6.1	1.3	2567	295	24.3	2.7	2079	297	19.7	2.8	1008	178	9.5
0500000US21165	21165	Menifee County, Kentucky	2427	158	2427	(X)	1729	131	71.2	4.8	675	101	27.8	4	1277	135	52.6	5.5	422	83	17.4	3.5	105	49	4.3	2	70	46	2.9	1.9	347	94	14.3	3.7	183	69	7.5	2.7	698	138	28.8	4.8	605	127	24.9	4.6	212	59	8.7
0500000US21167	21167	Mercer County, Kentucky	8824	227	8824	(X)	6177	291	70	2.6	2181	192	24.7	2.1	4742	301	53.7	3	1550	170	17.6	1.9	384	120	4.4	1.3	218	93	2.5	1.1	1051	162	11.9	1.8	413	119	4.7	1.3	2647	236	30	2.6	2268	219	25.7	2.4	955	130	10.8
0500000US21169	21169	Metcalfe County, Kentucky	3936	154	3936	(X)	2691	180	68.4	3.6	1065	151	27.1	3.5	2222	162	56.5	3.5	853	118	21.7	2.8	149	69	3.8	1.7	44	29	1.1	0.7	320	84	8.1	2.1	168	82	4.3	2.1	1245	149	31.6	3.6	1080	145	27.4	3.6	440	101	11.2
0500000US21171	21171	Monroe County, Kentucky	4443	142	4443	(X)	2958	154	66.6	3.4	1071	129	24.1	2.6	2377	159	53.5	3.5	773	111	17.4	2.3	124	61	2.8	1.4	89	56	2	1.3	457	104	10.3	2.3	209	71	4.7	1.6	1485	169	33.4	3.4	1248	161	28.1	3.3	624	103	14
0500000US21173	21173	Montgomery County, Kentucky	10248	302	10248	(X)	6852	308	66.9	2.9	3045	238	29.7	2.1	4931	332	48.1	3.4	1924	199	18.8	2	496	161	4.8	1.5	356	148	3.5	1.4	1425	261	13.9	2.5	765	190	7.5	1.8	3396	336	33.1	2.9	2734	321	26.7	2.9	1023	172	10
0500000US21175	21175	Morgan County, Kentucky	4808	180	4808	(X)	3545	171	73.7	2.7	1322	149	27.5	2.6	2735	168	56.9	3.5	876	116	18.2	2.3	205	69	4.3	1.4	123	59	2.6	1.2	605	116	12.6	2.3	323	91	6.7	1.8	1263	147	26.3	2.7	1111	130	23.1	2.5	485	71	10.1
0500000US21177	21177	Muhlenberg County, Kentucky	11539	312	11539	(X)	8335	307	72.2	2.3	2981	267	25.8	2.1	6510	304	56.4	2.5	2073	229	18	1.9	397	136	3.4	1.2	137	79	1.2	0.7	1428	233	12.4	2	771	177	6.7	1.5	3204	296	27.8	2.3	2920	291	25.3	2.4	1278	161	11.1
0500000US21179	21179	Nelson County, Kentucky	16817	272	16817	(X)	12610	393	75	2.3	5850	318	34.8	1.9	9395	452	55.9	2.7	3855	335	22.9	2	1011	264	6	1.6	680	222	4	1.3	2204	355	13.1	2.1	1315	303	7.8	1.8	4207	401	25	2.3	3505	368	20.8	2.1	1277	206	7.6
0500000US21181	21181	Nicholas County, Kentucky	2824	147	2824	(X)	1930	152	68.3	4.2	768	114	27.2	3.3	1501	135	53.2	4.9	503	86	17.8	3	81	43	2.9	1.5	55	40	1.9	1.4	348	95	12.3	3.1	210	83	7.4	2.8	894	130	31.7	4.2	743	116	26.3	3.7	315	77	11.2
0500000US21183	21183	Ohio County, Kentucky	8813	292	8813	(X)	6466	299	73.4	2.4	2540	224	28.8	2.3	5105	280	57.9	2.8	1709	204	19.4	2.3	372	107	4.2	1.2	233	96	2.6	1.1	989	193	11.2	2.1	598	137	6.8	1.5	2347	221	26.6	2.4	2029	181	23	2	981	136	11.1
0500000US21185	21185	Oldham County, Kentucky	19706	283	19706	(X)	16005	355	81.2	1.5	8016	320	40.7	1.4	13455	357	68.3	1.8	6548	299	33.2	1.4	753	166	3.8	0.8	466	116	2.4	0.6	1797	277	9.1	1.4	1002	215	5.1	1.1	3701	308	18.8	1.5	3181	306	16.1	1.5	1176	165	6
0500000US21187	21187	Owen County, Kentucky	4123	224	4123	(X)	2876	229	69.8	4.1	1170	136	28.4	3.2	2194	225	53.2	5	799	138	19.4	3.5	260	90	6.3	2.1	127	66	3.1	1.6	422	116	10.2	2.7	244	112	5.9	2.7	1247	180	30.2	4.1	1108	184	26.9	4.2	458	120	11.1
0500000US21189	21189	Owsley County, Kentucky	1773	123	1773	(X)	1192	105	67.2	5.9	444	82	25	5	756	130	42.6	7.2	239	71	13.5	4.1	137	66	7.7	3.7	46	46	2.6	2.6	299	87	16.9	5	159	64	9	3.6	581	125	32.8	5.9	567	125	32	5.9	210	64	11.8
0500000US21191	21191	Pendleton County, Kentucky	5356	204	5356	(X)	3760	248	70.2	4.1	1426	199	26.6	3.5	3012	228	56.2	4.1	1052	166	19.6	3	254	93	4.7	1.7	106	56	2	1	494	136	9.2	2.5	268	91	5	1.7	1596	237	29.8	4.1	1320	199	24.6	3.5	549	135	10.3
0500000US21193	21193	Perry County, Kentucky	11080	357	11080	(X)	7809	442	70.5	3.1	3171	320	28.6	2.6	5629	405	50.8	3.2	2164	277	19.5	2.3	617	147	5.6	1.3	252	94	2.3	0.8	1563	287	14.1	2.5	755	204	6.8	1.8	3271	358	29.5	3.1	2784	319	25.1	2.8	1184	184	10.7
0500000US21195	21195	Pike County, Kentucky	26124	430	26124	(X)	17898	481	68.5	1.6	7013	389	26.8	1.4	13491	502	51.6	1.8	5088	339	19.5	1.2	1288	214	4.9	0.8	528	135	2	0.5	3119	294	11.9	1.1	1397	188	5.3	0.7	8226	471	31.5	1.6	7201	453	27.6	1.6	2931	246	11.2
0500000US21197	21197	Powell County, Kentucky	4767	203	4767	(X)	3057	263	64.1	4.7	1174	164	24.6	3.2	2035	227	42.7	4.4	755	147	15.8	2.9	322	116	6.8	2.4	83	50	1.7	1	700	137	14.7	2.8	336	98	7	2	1710	232	35.9	4.7	1500	224	31.5	4.6	524	120	11
0500000US21199	21199	Pulaski County, Kentucky	25593	438	25593	(X)	17282	612	67.5	2.1	6684	462	26.1	1.7	12615	547	49.3	2	3998	362	15.6	1.4	941	241	3.7	0.9	416	168	1.6	0.6	3726	381	14.6	1.5	2270	322	8.9	1.2	8311	547	32.5	2.1	7032	483	27.5	1.8	2921	305	11.4
0500000US21201	21201	Robertson County, Kentucky	930	72	930	(X)	617	50	66.3	5.5	248	52	26.7	6	486	64	52.3	6.6	160	48	17.2	5.2	29	24	3.1	2.6	18	21	1.9	2.3	102	42	11	4.6	70	37	7.5	4.2	313	66	33.7	5.5	289	62	31.1	5.4	163	49	17.5
0500000US21203	21203	Rockcastle County, Kentucky	6621	207	6621	(X)	4648	202	70.2	3	1929	163	29.1	2.4	3516	206	53.1	3.3	1390	148	21	2.3	250	72	3.8	1.1	147	60	2.2	0.9	882	156	13.3	2.3	392	102	5.9	1.5	1973	228	29.8	3	1742	210	26.3	2.8	700	126	10.6
0500000US21205	21205	Rowan County, Kentucky	8542	419	8542	(X)	5171	355	60.5	3.8	2305	279	27	3.1	3913	311	45.8	3.6	1661	253	19.4	2.9	334	146	3.9	1.7	146	113	1.7	1.3	924	235	10.8	2.7	498	193	5.8	2.2	3371	400	39.5	3.8	2700	360	31.6	3.8	943	181	11
0500000US21207	21207	Russell County, Kentucky	7050	242	7050	(X)	4495	263	63.8	3.1	1535	199	21.8	2.6	3246	273	46	3.7	954	184	13.5	2.5	382	119	5.4	1.7	205	89	2.9	1.3	867	173	12.3	2.3	376	110	5.3	1.5	2555	239	36.2	3.1	2315	252	32.8	3.3	1031	132	14.6
0500000US21209	21209	Scott County, Kentucky	18421	407	18421	(X)	13574	458	73.7	1.8	6543	367	35.5	1.8	10465	431	56.8	2.1	4618	343	25.1	1.8	767	168	4.2	0.9	392	104	2.1	0.6	2342	301	12.7	1.6	1533	258	8.3	1.4	4847	332	26.3	1.8	4009	306	21.8	1.6	1289	176	7
0500000US21211	21211	Shelby County, Kentucky	15888	285	15888	(X)	11823	387	74.4	2.2	5215	333	32.8	1.9	9275	470	58.4	2.9	3746	366	23.6	2.3	765	243	4.8	1.5	460	192	2.9	1.2	1783	288	11.2	1.8	1009	239	6.4	1.5	4065	364	25.6	2.2	3441	324	21.7	2	1381	214	8.7
0500000US21213	21213	Simpson County, Kentucky	6793	188	6793	(X)	4576	249	67.4	3.6	1549	211	22.8	3.1	3407	257	50.2	4	1032	162	15.2	2.4	394	153	5.8	2.2	288	142	4.2	2.1	775	185	11.4	2.7	229	101	3.4	1.5	2217	265	32.6	3.6	1896	239	27.9	3.3	709	153	10.4
0500000US21215	21215	Spencer County, Kentucky	6418	168	6418	(X)	5175	249	80.6	3.4	2240	217	34.9	3.3	4238	226	66	3.5	1628	180	25.4	2.8	325	115	5.1	1.8	213	91	3.3	1.4	612	176	9.5	2.7	399	149	6.2	2.3	1243	223	19.4	3.4	1021	215	15.9	3.3	304	104	4.7
0500000US21217	21217	Taylor County, Kentucky	9715	276	9715	(X)	6360	300	65.5	2.7	2679	279	27.6	2.8	4443	294	45.7	3	1503	209	15.5	2.1	465	163	4.8	1.7	247	131	2.5	1.3	1452	236	14.9	2.3	929	190	9.6	1.9	3355	287	34.5	2.7	2932	261	30.2	2.5	1336	162	13.8
0500000US21219	21219	Todd County, Kentucky	4567	157	4567	(X)	3284	190	71.9	3.6	1460	125	32	2.5	2409	179	52.7	3.9	974	132	21.3	2.9	320	119	7	2.5	175	89	3.8	1.9	555	100	12.2	2.2	311	89	6.8	1.9	1283	175	28.1	3.6	1158	152	25.4	3.1	542	93	11.9
0500000US21221	21221	Trigg County, Kentucky	6014	239	6014	(X)	4186	294	69.6	4.1	1477	201	24.6	3	3177	258	52.8	4.1	870	151	14.5	2.4	245	97	4.1	1.6	97	72	1.6	1.2	764	158	12.7	2.5	510	143	8.5	2.3	1828	257	30.4	4.1	1477	219	24.6	3.5	787	145	13.1
0500000US21223	21223	Trimble County, Kentucky	3548	134	3548	(X)	2432	197	68.5	5.1	931	182	26.2	5	2044	214	57.6	5.7	630	160	17.8	4.4	105	65	3	1.8	101	65	2.8	1.8	283	97	8	2.7	200	91	5.6	2.5	1116	189	31.5	5.1	937	163	26.4	4.4	324	87	9.1
0500000US21225	21225	Union County, Kentucky	5562	220	5562	(X)	3722	237	66.9	3.7	1512	149	27.2	2.3	2806	213	50.4	3.7	1026	124	18.4	2.2	206	100	3.7	1.7	147	93	2.6	1.6	710	154	12.8	2.8	339	109	6.1	2	1840	227	33.1	3.7	1625	203	29.2	3.2	683	108	12.3
0500000US21227	21227	Warren County, Kentucky	45387	512	45387	(X)	29513	722	65	1.5	13164	568	29	1.3	21647	681	47.7	1.5	8606	488	19	1.1	2272	415	5	0.9	1152	281	2.5	0.6	5594	501	12.3	1.1	3406	449	7.5	1	15874	733	35	1.5	12131	626	26.7	1.4	3793	361	8.4
0500000US21229	21229	Washington County, Kentucky	4495	169	4495	(X)	3170	187	70.5	4	1272	144	28.3	3.3	2420	183	53.8	4.1	883	119	19.6	2.7	155	79	3.4	1.8	99	73	2.2	1.6	595	137	13.2	3	290	106	6.5	2.3	1325	201	29.5	4	1160	186	25.8	3.8	578	134	12.9
0500000US21231	21231	Wayne County, Kentucky	7917	308	7917	(X)	5200	292	65.7	3.7	2100	238	26.5	2.9	3830	284	48.4	3.7	1405	202	17.7	2.5	461	140	5.8	1.7	186	87	2.3	1.1	909	195	11.5	2.5	509	166	6.4	2.1	2717	347	34.3	3.7	2489	336	31.4	3.6	976	211	12.3
0500000US21233	21233	Webster County, Kentucky	5129	161	5129	(X)	3630	176	70.8	2.6	1348	143	26.3	2.4	2900	186	56.5	3.4	1008	121	19.7	2.2	243	64	4.7	1.2	79	35	1.5	0.7	487	118	9.5	2.2	261	108	5.1	2.1	1499	140	29.2	2.6	1330	141	25.9	2.7	554	98	10.8
0500000US21235	21235	Whitley County, Kentucky	13110	386	13110	(X)	9572	442	73	2.7	3814	357	29.1	2.6	6567	379	50.1	2.7	2552	280	19.5	2.1	1078	268	8.2	2	377	161	2.9	1.2	1927	285	14.7	2.1	885	186	6.8	1.4	3538	367	27	2.7	3016	331	23	2.4	1359	213	10.4
0500000US21237	21237	Wolfe County, Kentucky	2918	143	2918	(X)	1804	165	61.8	5	681	117	23.3	3.9	1322	146	45.3	4.4	401	104	13.7	3.5	120	58	4.1	2	74	48	2.5	1.7	362	90	12.4	3.1	206	77	7.1	2.6	1114	160	38.2	5	965	167	33.1	5.4	350	87	12
0500000US21239	21239	Woodford County, Kentucky	9802	228	9802	(X)	6790	264	69.3	2.4	2947	252	30.1	2.3	5463	220	55.7	2.3	2238	209	22.8	2	402	125	4.1	1.3	156	85	1.6	0.9	925	191	9.4	1.9	553	170	5.6	1.7	3012	261	30.7	2.4	2500	244	25.5	2.4	930	130	9.5
0500000US39001	39001	Adams County, Ohio	10858	282	10858	(X)	7441	317	68.5	2.7	3065	246	28.2	2.1	5481	314	50.5	2.8	1932	220	17.8	1.9	582	186	5.4	1.7	371	149	3.4	1.4	1378	213	12.7	2	762	164	7	1.5	3417	325	31.5	2.7	2986	316	27.5	2.7	1354	198	12.5
0500000US39003	39003	Allen County, Ohio	39986	526	39986	(X)	26203	629	65.5	1.4	11508	443	28.8	0.9	18446	560	46.1	1.4	6761	374	16.9	0.9	2019	305	5	0.8	1256	251	3.1	0.6	5738	427	14.4	1	3491	331	8.7	0.8	13783	596	34.5	1.4	11468	577	28.7	1.4	4632	325	11.6
0500000US39005	39005	Ashland County, Ohio	20427	309	20427	(X)	13980	373	68.4	1.7	5751	312	28.2	1.4	11131	408	54.5	2.1	4042	288	19.8	1.4	878	197	4.3	1	488	146	2.4	0.7	1971	252	9.6	1.2	1221	223	6	1.1	6447	384	31.6	1.7	5335	367	26.1	1.7	2278	250	11.2
0500000US39007	39007	Ashtabula County, Ohio	38890	590	38890	(X)	25206	511	64.8	1.2	10064	442	25.9	1	18416	554	47.4	1.5	6178	410	15.9	1	1984	289	5.1	0.7	1209	227	3.1	0.6	4806	414	12.4	1	2677	316	6.9	0.8	13684	571	35.2	1.2	11345	571	29.2	1.3	4814	326	12.4
0500000US39009	39009	Athens County, Ohio	22486	402	22486	(X)	12464	421	55.4	1.7	5205	348	23.1	1.5	9092	391	40.4	1.5	3180	250	14.1	1.1	1249	241	5.6	1.1	711	178	3.2	0.8	2123	265	9.4	1.2	1314	239	5.8	1.1	10022	457	44.6	1.7	7364	453	32.7	1.9	1913	184	8.5
0500000US39011	39011	Auglaize County, Ohio	18193	301	18193	(X)	12463	367	68.5	2	4908	265	27	1.4	10320	368	56.7	2.1	3755	230	20.6	1.2	710	146	3.9	0.8	359	109	2	0.6	1433	227	7.9	1.2	794	193	4.4	1.1	5730	389	31.5	2	4790	335	26.3	1.7	2374	205	13
0500000US39013	39013	Belmont County, Ohio	27935	423	27935	(X)	18038	418	64.6	1.3	6536	334	23.4	1.1	13965	432	50	1.5	4651	276	16.6	0.9	1333	229	4.8	0.8	509	124	1.8	0.4	2740	262	9.8	0.9	1376	211	4.9	0.8	9897	426	35.4	1.3	8644	413	30.9	1.3	3841	237	13.7
0500000US39015	39015	Brown County, Ohio	16672	336	16672	(X)	12053	420	72.3	2.1	4500	371	27	2.1	9113	390	54.7	2.3	3067	284	18.4	1.7	784	159	4.7	0.9	323	110	1.9	0.7	2156	252	12.9	1.5	1110	185	6.7	1.1	4619	376	27.7	2.1	3886	341	23.3	2	1604	183	9.6
0500000US39017	39017	Butler County, Ohio	134720	957	134720	(X)	93384	1154	69.3	0.7	41087	1017	30.5	0.7	70966	1187	52.7	0.8	28173	871	20.9	0.6	6223	523	4.6	0.4	3116	437	2.3	0.3	16195	773	12	0.6	9798	624	7.3	0.5	41336	1059	30.7	0.7	32813	880	24.4	0.6	12089	504	9
0500000US39019	39019	Carroll County, Ohio	10972	307	10972	(X)	7816	335	71.2	2.4	2763	181	25.2	1.4	6508	314	59.3	2.6	2121	187	19.3	1.7	419	130	3.8	1.2	150	68	1.4	0.6	889	172	8.1	1.5	492	138	4.5	1.2	3156	281	28.8	2.4	2549	265	23.2	2.2	1283	212	11.7
0500000US39021	39021	Champaign County, Ohio	15237	309	15237	(X)	10826	346	71.1	2	4301	258	28.2	1.5	8394	331	55.1	2.1	2854	220	18.7	1.4	712	159	4.7	1	453	126	3	0.8	1720	234	11.3	1.5	994	182	6.5	1.2	4411	324	28.9	2	3511	299	23	1.9	1631	182	10.7
0500000US39023	39023	Clark County, Ohio	54809	524	54809	(X)	35980	660	65.6	1.1	14736	463	26.9	0.8	25299	685	46.2	1.3	8514	426	15.5	0.8	2705	315	4.9	0.6	1444	269	2.6	0.5	7976	500	14.6	0.9	4778	357	8.7	0.6	18829	684	34.4	1.1	15778	661	28.8	1.1	6893	376	12.6
0500000US39025	39025	Clermont County, Ohio	74812	712	74812	(X)	53236	761	71.2	0.8	22849	652	30.5	0.8	41674	845	55.7	1.1	16398	631	21.9	0.8	3770	432	5	0.6	2007	333	2.7	0.4	7792	592	10.4	0.8	4444	484	5.9	0.6	21576	667	28.8	0.8	17928	683	24	0.9	6766	386	9
0500000US39027	39027	Clinton County, Ohio	16073	340	16073	(X)	11097	397	69	2.2	4844	351	30.1	2.1	8362	336	52	2.1	2995	266	18.6	1.6	818	206	5.1	1.3	588	182	3.7	1.1	1917	218	11.9	1.3	1261	173	7.8	1.1	4976	392	31	2.2	4170	346	25.9	2	1788	181	11.1
0500000US39029	39029	Columbiana County, Ohio	42087	526	42087	(X)	28616	615	68	1.3	10869	416	25.8	1	21401	710	50.8	1.7	7083	447	16.8	1.1	2089	345	5	0.8	1055	258	2.5	0.6	5126	409	12.2	1	2731	278	6.5	0.7	13471	619	32	1.3	11370	577	27	1.3	4973	355	11.8
0500000US39031	39031	Coshocton County, Ohio	14335	295	14335	(X)	9961	311	69.5	2	3704	226	25.8	1.5	7880	297	55	2	2670	194	18.6	1.3	622	154	4.3	1.1	274	95	1.9	0.7	1459	208	10.2	1.4	760	146	5.3	1	4374	319	30.5	2	3766	275	26.3	1.8	1721	149	12
0500000US39033	39033	Crawford County, Ohio	17798	291	17798	(X)	11722	335	65.9	1.7	4352	257	24.5	1.3	9159	331	51.5	1.9	2789	211	15.7	1.1	753	154	4.2	0.9	406	131	2.3	0.7	1810	226	10.2	1.2	1157	201	6.5	1.1	6076	335	34.1	1.7	5190	333	29.2	1.7	2481	222	13.9
0500000US39035	39035	Cuyahoga County, Ohio	534719	1996	534719	(X)	305683	2175	57.2	0.4	129933	1820	24.3	0.3	197589	2078	37	0.4	73016	1238	13.7	0.2	23268	899	4.4	0.2	10079	660	1.9	0.1	84826	1435	15.9	0.3	46838	1313	8.8	0.2	229036	2125	42.8	0.4	199054	2033	37.2	0.3	70537	1258	13.2
0500000US39037	39037	Darke County, Ohio	20865	320	20865	(X)	14154	319	67.8	1.4	5741	273	27.5	1.2	11398	350	54.6	1.6	4060	254	19.5	1.1	808	140	3.9	0.7	440	105	2.1	0.5	1948	207	9.3	1	1241	184	5.9	0.9	6711	339	32.2	1.4	5920	359	28.4	1.6	2726	218	13.1
0500000US39039	39039	Defiance County, Ohio	15279	251	15279	(X)	10561	327	69.1	2.1	4004	271	26.2	1.7	7964	313	52.1	2.1	2552	231	16.7	1.5	901	164	5.9	1.1	473	131	3.1	0.9	1696	194	11.1	1.3	979	167	6.4	1.1	4718	354	30.9	2.1	3909	329	25.6	2	1474	210	9.6
0500000US39041	39041	Delaware County, Ohio	65648	417	65648	(X)	50267	636	76.6	1	26343	603	40.1	0.9	43178	735	65.8	1.2	21723	553	33.1	0.8	2015	338	3.1	0.5	1266	250	1.9	0.4	5074	503	7.7	0.8	3354	406	5.1	0.6	15381	680	23.4	1	12966	620	19.8	0.9	4566	356	7
0500000US39043	39043	Erie County, Ohio	31767	551	31767	(X)	20161	539	63.5	1.4	7319	409	23	1.2	14946	529	47	1.6	4386	324	13.8	1	1190	255	3.7	0.8	596	176	1.9	0.5	4025	335	12.7	1	2337	274	7.4	0.8	11606	514	36.5	1.4	9926	514	31.2	1.4	4177	316	13.1
0500000US39045	39045	Fairfield County, Ohio	55032	576	55032	(X)	39967	729	72.6	1.2	18292	607	33.2	1	31565	683	57.4	1.1	12985	487	23.6	0.8	2254	270	4.1	0.5	1425	233	2.6	0.4	6148	546	11.2	1	3882	482	7.1	0.9	15065	688	27.4	1.2	12515	616	22.7	1.1	5203	362	9.5
0500000US39047	39047	Fayette County, Ohio	11589	204	11589	(X)	7669	298	66.2	2.5	3330	226	28.7	1.8	5654	288	48.8	2.5	1971	200	17	1.7	593	157	5.1	1.4	361	107	3.1	0.9	1422	228	12.3	1.9	998	186	8.6	1.6	3920	305	33.8	2.5	3339	277	28.8	2.2	1353	161	11.7
0500000US39049	39049	Franklin County, Ohio	480946	2032	480946	(X)	279594	2768	58.1	0.6	133715	1926	27.8	0.4	190142	2817	39.5	0.6	81763	1726	17	0.3	21690	1083	4.5	0.2	10793	741	2.2	0.2	67762	1575	14.1	0.3	41159	1413	8.6	0.3	201352	2913	41.9	0.6	157028	2614	32.6	0.5	39604	1185	8.2
0500000US39051	39051	Fulton County, Ohio	16229	251	16229	(X)	11943	314	73.6	1.5	4937	241	30.4	1.4	9816	286	60.5	1.6	3600	240	22.2	1.4	743	166	4.6	1	446	137	2.7	0.8	1384	214	8.5	1.3	891	182	5.5	1.1	4286	247	26.4	1.5	3748	236	23.1	1.4	1465	153	9
0500000US39053	39053	Gallia County, Ohio	11590	314	11590	(X)	8202	344	70.8	2.4	3079	256	26.6	2	6075	345	52.4	2.9	2031	225	17.5	1.9	734	164	6.3	1.4	329	121	2.8	1	1393	232	12	1.9	719	184	6.2	1.6	3388	306	29.2	2.4	2985	284	25.8	2.4	1440	196	12.4
0500000US39055	39055	Geauga County, Ohio	34774	380	34774	(X)	26125	533	75.1	1.4	9998	395	28.8	1.1	22126	508	63.6	1.4	8194	351	23.6	1	983	187	2.8	0.5	313	127	0.9	0.4	3016	331	8.7	0.9	1491	251	4.3	0.7	8649	511	24.9	1.4	7133	388	20.5	1.1	3067	305	8.8
0500000US39057	39057	Greene County, Ohio	64182	582	64182	(X)	42229	633	65.8	1	17423	642	27.1	1	33381	649	52	1	12445	531	19.4	0.8	2166	343	3.4	0.5	1108	262	1.7	0.4	6682	520	10.4	0.8	3870	395	6	0.6	21953	714	34.2	1	18239	711	28.4	1	6730	321	10.5
0500000US39059	39059	Guernsey County, Ohio	15558	392	15558	(X)	10305	423	66.2	2	4104	282	26.4	1.6	7725	330	49.7	1.7	2700	219	17.4	1.3	687	136	4.4	0.8	333	102	2.1	0.6	1893	236	12.2	1.5	1071	213	6.9	1.3	5253	326	33.8	2	4358	248	28	1.6	1942	195	12.5
0500000US39061	39061	Hamilton County, Ohio	331638	1500	331638	(X)	194047	1468	58.5	0.4	86700	1330	26.1	0.4	130157	1515	39.2	0.5	49899	1178	15	0.3	13144	896	4	0.3	6497	643	2	0.2	50746	1172	15.3	0.3	30304	918	9.1	0.3	137591	1646	41.5	0.4	114903	1570	34.6	0.4	36642	1013	11
0500000US39063	39063	Hancock County, Ohio	31083	369	31083	(X)	20133	464	64.8	1.5	8517	425	27.4	1.4	15701	553	50.5	1.7	5733	435	18.4	1.4	1338	295	4.3	0.9	908	240	2.9	0.8	3094	343	10	1.1	1876	286	6	0.9	10950	514	35.2	1.5	8927	549	28.7	1.7	3556	301	11.4
0500000US39065	39065	Hardin County, Ohio	11540	275	11540	(X)	7686	343	66.6	2.7	3310	279	28.7	2.2	6051	284	52.4	2.4	2352	233	20.4	1.9	482	133	4.2	1.1	234	92	2	0.8	1153	175	10	1.5	724	168	6.3	1.4	3854	328	33.4	2.7	3245	306	28.1	2.6	1394	186	12.1
0500000US39067	39067	Harrison County, Ohio	6271	186	6271	(X)	4422	175	70.5	2.5	1726	177	27.5	2.6	3560	176	56.8	3	1270	158	20.3	2.5	239	66	3.8	1	106	45	1.7	0.7	623	134	9.9	2.1	350	116	5.6	1.8	1849	176	29.5	2.5	1566	161	25	2.3	805	130	12.8
0500000US39069	39069	Henry County, Ohio	10958	175	10958	(X)	7698	242	70.3	2	3117	182	28.4	1.6	6124	242	55.9	2.1	2121	171	19.4	1.5	492	95	4.5	0.9	338	86	3.1	0.8	1082	143	9.9	1.3	658	120	6	1.1	3260	225	29.7	2	2727	212	24.9	1.9	1295	167	11.8
0500000US39071	39071	Highland County, Ohio	16696	328	16696	(X)	11239	405	67.3	2.1	4565	319	27.3	1.8	8327	366	49.9	2.1	2898	220	17.4	1.3	1034	235	6.2	1.4	580	163	3.5	1	1878	264	11.2	1.6	1087	196	6.5	1.2	5457	373	32.7	2.1	4468	335	26.8	2	2032	234	12.2
0500000US39073	39073	Hocking County, Ohio	11387	276	11387	(X)	7841	291	68.9	2.2	3040	218	26.7	1.8	6138	292	53.9	2.5	2028	172	17.8	1.5	423	111	3.7	1	201	78	1.8	0.7	1280	203	11.2	1.8	811	171	7.1	1.5	3546	277	31.1	2.2	3050	285	26.8	2.3	1303	177	11.4
0500000US39075	39075	Holmes County, Ohio	12685	259	12685	(X)	10177	341	80.2	2.1	5017	220	39.6	1.7	8957	305	70.6	2	4459	185	35.2	1.4	454	165	3.6	1.3	152	68	1.2	0.5	766	165	6	1.3	406	136	3.2	1.1	2508	273	19.8	2.1	2136	257	16.8	2	964	154	7.6
0500000US39077	39077	Huron County, Ohio	22527	349	22527	(X)	15754	400	69.9	1.5	6718	345	29.8	1.4	11915	412	52.9	1.7	4571	313	20.3	1.3	1135	209	5	0.9	571	140	2.5	0.6	2704	291	12	1.2	1576	244	7	1.1	6773	348	30.1	1.5	5480	370	24.3	1.6	2374	206	10.5
0500000US39079	39079	Jackson County, Ohio	12981	308	12981	(X)	8592	394	66.2	2.7	3691	325	28.4	2.3	6155	402	47.4	3.1	2350	302	18.1	2.3	800	182	6.2	1.4	407	135	3.1	1	1637	305	12.6	2.3	934	277	7.2	2.1	4389	367	33.8	2.7	3800	339	29.3	2.5	1543	204	11.9
0500000US39081	39081	Jefferson County, Ohio	27958	441	27958	(X)	18208	473	65.1	1.4	6415	322	22.9	1	13403	447	47.9	1.5	4120	258	14.7	0.9	1545	196	5.5	0.7	541	142	1.9	0.5	3260	264	11.7	0.9	1754	240	6.3	0.8	9750	430	34.9	1.4	8350	377	29.9	1.3	4015	274	14.4
0500000US39083	39083	Knox County, Ohio	22759	359	22759	(X)	15269	504	67.1	2.1	6360	349	27.9	1.4	12251	552	53.8	2.4	4542	365	20	1.6	902	180	4	0.8	506	125	2.2	0.6	2116	279	9.3	1.2	1312	254	5.8	1.1	7490	498	32.9	2.1	6004	438	26.4	1.8	2700	278	11.9
0500000US39085	39085	Lake County, Ohio	94815	687	94815	(X)	61685	851	65.1	0.8	24164	698	25.5	0.7	47543	820	50.1	0.8	16712	594	17.6	0.6	4192	451	4.4	0.5	2030	335	2.1	0.4	9950	524	10.5	0.5	5422	454	5.7	0.5	33130	851	34.9	0.8	28053	850	29.6	0.8	11378	557	12
0500000US39087	39087	Lawrence County, Ohio	23548	442	23548	(X)	15963	555	67.8	1.8	5714	471	24.3	1.8	11712	511	49.7	2	3765	392	16	1.6	1147	257	4.9	1.1	557	190	2.4	0.8	3104	381	13.2	1.6	1392	265	5.9	1.1	7585	426	32.2	1.8	6512	432	27.7	1.8	3123	290	13.3
0500000US39089	39089	Licking County, Ohio	64230	640	64230	(X)	45206	734	70.4	1	19164	634	29.8	0.9	35343	776	55	1.2	13340	634	20.8	0.9	2590	370	4	0.6	1582	285	2.5	0.4	7273	582	11.3	0.9	4242	453	6.6	0.7	19024	670	29.6	1	15853	669	24.7	1	6310	420	9.8
0500000US39091	39091	Logan County, Ohio	18640	346	18640	(X)	12733	376	68.3	1.6	5052	266	27.1	1.3	9477	370	50.8	1.9	3127	250	16.8	1.3	981	157	5.3	0.8	595	142	3.2	0.8	2275	284	12.2	1.5	1330	215	7.1	1.1	5907	332	31.7	1.6	4750	293	25.5	1.5	1960	204	10.5
0500000US39093	39093	Lorain County, Ohio	117298	838	117298	(X)	79771	966	68	0.7	32777	858	27.9	0.7	57575	879	49.1	0.7	20555	674	17.5	0.6	5832	452	5	0.4	2548	376	2.2	0.3	16364	651	14	0.6	9674	550	8.2	0.5	37527	886	32	0.7	31794	895	27.1	0.7	12893	581	11
0500000US39095	39095	Lucas County, Ohio	177619	1063	177619	(X)	106520	1259	60	0.7	47014	1074	26.5	0.6	69053	1132	38.9	0.6	25324	864	14.3	0.5	9405	684	5.3	0.4	4822	575	2.7	0.3	28062	894	15.8	0.5	16868	687	9.5	0.4	71099	1312	40	0.7	58818	1279	33.1	0.7	19976	715	11.2
0500000US39097	39097	Madison County, Ohio	14906	262	14906	(X)	10519	300	70.6	1.9	4451	253	29.9	1.6	8060	309	54.1	2	3138	237	21.1	1.6	846	190	5.7	1.3	404	123	2.7	0.8	1613	250	10.8	1.7	909	204	6.1	1.4	4387	303	29.4	1.9	3738	286	25.1	1.8	1702	187	11.4
0500000US39099	39099	Mahoning County, Ohio	97790	857	97790	(X)	60900	843	62.3	0.8	23380	608	23.9	0.6	41568	792	42.5	0.8	13113	561	13.4	0.6	4597	400	4.7	0.4	2163	250	2.2	0.3	14735	636	15.1	0.7	8104	503	8.3	0.5	36890	933	37.7	0.8	32287	959	33	0.9	13886	628	14.2
0500000US39101	39101	Marion County, Ohio	24478	398	24478	(X)	16761	402	68.5	1.5	6349	300	25.9	1.3	12333	376	50.4	1.5	3949	274	16.1	1.2	1082	186	4.4	0.7	549	148	2.2	0.6	3346	321	13.7	1.3	1851	255	7.6	1.1	7717	428	31.5	1.5	6641	382	27.1	1.4	2994	277	12.2
0500000US39103	39103	Medina County, Ohio	66002	538	66002	(X)	47945	733	72.6	0.9	20371	537	30.9	0.8	39249	802	59.5	1	15613	470	23.7	0.7	2839	338	4.3	0.5	1428	252	2.2	0.4	5857	447	8.9	0.7	3330	373	5	0.6	18057	581	27.4	0.9	15283	621	23.2	0.9	6711	397	10.2
0500000US39105	39105	Meigs County, Ohio	9322	227	9322	(X)	6420	230	68.9	2.3	2432	160	26.1	1.5	4890	222	52.5	2.5	1603	163	17.2	1.7	574	135	6.2	1.4	351	115	3.8	1.2	956	149	10.3	1.6	478	113	5.1	1.2	2902	239	31.1	2.3	2450	240	26.3	2.4	921	124	9.9
0500000US39107	39107	Mercer County, Ohio	15919	283	15919	(X)	11099	294	69.7	1.8	4506	249	28.3	1.5	9214	346	57.9	2.2	3512	263	22.1	1.6	762	189	4.8	1.2	361	124	2.3	0.8	1123	169	7.1	1.1	633	134	4	0.8	4820	327	30.3	1.8	4130	291	25.9	1.7	2147	189	13.5
0500000US39109	39109	Miami County, Ohio	41135	468	41135	(X)	27826	504	67.6	1.2	11502	485	28	1.1	21472	527	52.2	1.3	7509	373	18.3	0.9	2140	320	5.2	0.8	1342	303	3.3	0.7	4214	408	10.2	1	2651	360	6.4	0.9	13309	577	32.4	1.2	10958	558	26.6	1.3	4774	335	11.6
0500000US39111	39111	Monroe County, Ohio	6056	208	6056	(X)	4204	221	69.4	2.6	1492	151	24.6	2.2	3229	180	53.3	2.7	937	120	15.5	1.9	354	113	5.8	1.8	256	102	4.2	1.7	621	136	10.3	2.1	299	91	4.9	1.5	1852	166	30.6	2.6	1601	161	26.4	2.6	771	118	12.7
0500000US39113	39113	Montgomery County, Ohio	222687	1260	222687	(X)	133872	1565	60.1	0.6	57399	1105	25.8	0.4	90061	1173	40.4	0.5	32339	887	14.5	0.4	10088	745	4.5	0.3	5411	622	2.4	0.3	33723	987	15.1	0.4	19649	785	8.8	0.3	88815	1503	39.9	0.6	76314	1424	34.3	0.6	28164	914	12.6
0500000US39115	39115	Morgan County, Ohio	6120	194	6120	(X)	4378	204	71.5	2.5	1565	173	25.6	2.4	3493	209	57.1	3.2	1125	162	18.4	2.5	279	97	4.6	1.6	123	52	2	0.8	606	119	9.9	1.8	317	94	5.2	1.5	1742	162	28.5	2.5	1540	153	25.2	2.4	730	129	11.9
0500000US39117	39117	Morrow County, Ohio	12700	276	12700	(X)	9392	313	74	2.4	3636	284	28.6	2.2	7500	367	59.1	2.9	2638	263	20.8	2.1	648	178	5.1	1.4	272	115	2.1	0.9	1244	227	9.8	1.8	726	177	5.7	1.4	3308	336	26	2.4	2798	291	22	2.1	1308	219	10.3
0500000US39119	39119	Muskingum County, Ohio	34261	424	34261	(X)	22897	477	66.8	1.3	9515	404	27.8	1.1	16446	521	48	1.6	5645	383	16.5	1.1	1886	258	5.5	0.8	1040	190	3	0.6	4565	373	13.3	1	2830	309	8.3	0.9	11364	515	33.2	1.3	9469	486	27.6	1.3	3930	371	11.5
0500000US39121	39121	Noble County, Ohio	4886	197	4886	(X)	3362	221	68.8	3.4	761	134	15.6	2.6	2884	223	59	3.9	567	129	11.6	2.6	136	60	2.8	1.2	32	20	0.7	0.4	342	114	7	2.3	162	68	3.3	1.4	1524	174	31.2	3.4	1373	167	28.1	3.3	641	118	13.1
0500000US39123	39123	Ottawa County, Ohio	17334	376	17334	(X)	12034	359	69.4	1.6	4061	267	23.4	1.4	9554	328	55.1	1.8	2733	242	15.8	1.3	778	157	4.5	0.9	448	125	2.6	0.7	1702	219	9.8	1.2	880	177	5.1	1	5300	323	30.6	1.6	4559	316	26.3	1.7	2219	196	12.8
0500000US39125	39125	Paulding County, Ohio	7699	209	7699	(X)	5303	187	68.9	2.2	2107	163	27.4	2	4327	168	56.2	2.5	1609	137	20.9	1.9	371	93	4.8	1.2	197	75	2.6	1	605	111	7.9	1.4	301	80	3.9	1	2396	199	31.1	2.2	2100	215	27.3	2.4	1040	125	13.5
0500000US39127	39127	Perry County, Ohio	13780	265	13780	(X)	10065	340	73	2.3	4092	252	29.7	1.8	7593	366	55.1	2.6	2760	260	20	1.8	798	152	5.8	1.1	433	116	3.1	0.8	1674	257	12.1	1.8	899	190	6.5	1.4	3715	335	27	2.3	3109	273	22.6	1.9	1189	171	8.6
0500000US39129	39129	Pickaway County, Ohio	19460	328	19460	(X)	14161	413	72.8	1.8	5735	301	29.5	1.4	11145	425	57.3	2.1	4037	298	20.7	1.5	830	190	4.3	1	518	159	2.7	0.8	2186	248	11.2	1.2	1180	197	6.1	1	5299	367	27.2	1.8	4422	346	22.7	1.7	1833	241	9.4
0500000US39131	39131	Pike County, Ohio	10940	282	10940	(X)	7254	389	66.3	3.2	2952	291	27	2.6	4959	331	45.3	3.1	1783	271	16.3	2.5	832	206	7.6	1.8	408	128	3.7	1.1	1463	257	13.4	2.3	761	200	7	1.8	3686	363	33.7	3.2	3122	369	28.5	3.4	1193	192	10.9
0500000US39133	39133	Portage County, Ohio	61055	574	61055	(X)	40002	676	65.5	1	15636	483	25.6	0.8	30509	798	50	1.2	10579	520	17.3	0.8	2556	375	4.2	0.6	1072	267	1.8	0.4	6937	466	11.4	0.8	3985	425	6.5	0.7	21053	681	34.5	1	15761	726	25.8	1.2	5277	419	8.6
0500000US39135	39135	Preble County, Ohio	16124	280	16124	(X)	11412	324	70.8	1.8	4471	223	27.7	1.3	9030	294	56	1.8	3169	202	19.7	1.2	709	143	4.4	0.9	420	100	2.6	0.6	1673	199	10.4	1.2	882	160	5.5	1	4712	312	29.2	1.8	3963	266	24.6	1.6	1868	194	11.6
0500000US39137	39137	Putnam County, Ohio	13049	171	13049	(X)	9523	261	73	1.8	4065	202	31.2	1.5	8350	264	64	2	3415	176	26.2	1.3	423	93	3.2	0.7	256	80	2	0.6	750	146	5.7	1.1	394	113	3	0.9	3526	244	27	1.8	3044	239	23.3	1.8	1593	169	12.2
0500000US39139	39139	Richland County, Ohio	48103	590	48103	(X)	30471	637	63.3	1.1	11792	471	24.5	0.9	22814	656	47.4	1.2	7241	501	15.1	1	1846	282	3.8	0.6	1039	210	2.2	0.4	5811	435	12.1	0.9	3512	382	7.3	0.8	17632	560	36.7	1.1	15233	527	31.7	1.1	7051	404	14.7
0500000US39141	39141	Ross County, Ohio	28269	450	28269	(X)	19608	480	69.4	1.4	8016	419	28.4	1.4	14631	527	51.8	1.7	5261	395	18.6	1.4	1107	186	3.9	0.7	486	139	1.7	0.5	3870	362	13.7	1.2	2269	307	8	1.1	8661	430	30.6	1.4	7264	437	25.7	1.5	3044	274	10.8
0500000US39143	39143	Sandusky County, Ohio	23626	392	23626	(X)	15850	374	67.1	1.4	6239	336	26.4	1.4	11698	381	49.5	1.6	3726	293	15.8	1.2	1298	203	5.5	0.8	755	188	3.2	0.8	2854	287	12.1	1.2	1758	253	7.4	1.1	7776	384	32.9	1.4	6578	387	27.8	1.5	2993	244	12.7
0500000US39145	39145	Scioto County, Ohio	29700	537	29700	(X)	18677	574	62.9	1.7	7421	491	25	1.6	13819	508	46.5	1.7	4604	400	15.5	1.4	1430	228	4.8	0.8	937	229	3.2	0.8	3428	391	11.5	1.3	1880	327	6.3	1.1	11023	583	37.1	1.7	9141	576	30.8	1.8	3896	312	13.1
0500000US39147	39147	Seneca County, Ohio	21538	351	21538	(X)	14426	399	67	1.6	5822	332	27	1.4	10950	327	50.8	1.5	3644	242	16.9	1.1	1046	197	4.9	0.9	614	156	2.9	0.7	2430	260	11.3	1.2	1564	230	7.3	1	7112	375	33	1.6	5983	324	27.8	1.5	2620	226	12.2
0500000US39149	39149	Shelby County, Ohio	18537	281	18537	(X)	13382	369	72.2	1.8	5843	327	31.5	1.6	10593	354	57.1	2	4055	248	21.9	1.3	835	188	4.5	1	531	173	2.9	0.9	1954	274	10.5	1.4	1257	241	6.8	1.3	5155	354	27.8	1.8	4303	345	23.2	1.8	1769	210	9.5
0500000US39151	39151	Stark County, Ohio	150385	904	150385	(X)	98810	1306	65.7	0.8	39750	847	26.4	0.5	72717	1113	48.4	0.7	24909	699	16.6	0.5	7643	618	5.1	0.4	4263	516	2.8	0.3	18450	681	12.3	0.4	10578	535	7	0.3	51575	1195	34.3	0.8	43652	1086	29	0.7	17732	743	11.8
0500000US39153	39153	Summit County, Ohio	220902	1134	220902	(X)	138178	1403	62.6	0.6	57224	1169	25.9	0.5	99581	1438	45.1	0.6	36396	892	16.5	0.4	9110	603	4.1	0.3	4050	453	1.8	0.2	29487	977	13.3	0.4	16778	855	7.6	0.4	82724	1426	37.4	0.6	69574	1295	31.5	0.5	25810	722	11.7
0500000US39155	39155	Trumbull County, Ohio	86828	684	86828	(X)	55428	840	63.8	0.9	20617	582	23.7	0.7	39637	835	45.7	1	12394	544	14.3	0.6	4357	440	5	0.5	1840	266	2.1	0.3	11434	642	13.2	0.7	6383	461	7.4	0.5	31400	876	36.2	0.9	27628	795	31.8	0.9	11778	525	13.6
0500000US39157	39157	Tuscarawas County, Ohio	36713	452	36713	(X)	25250	520	68.8	1.4	10127	419	27.6	1.1	19823	546	54	1.4	7074	398	19.3	1.1	1477	242	4	0.7	804	191	2.2	0.5	3950	389	10.8	1.1	2249	312	6.1	0.9	11463	550	31.2	1.4	9596	543	26.1	1.3	4482	366	12.2
0500000US39159	39159	Union County, Ohio	18431	357	18431	(X)	13816	363	75	1.7	6944	359	37.7	1.7	11372	462	61.7	2.4	5473	355	29.7	1.8	868	217	4.7	1.2	457	173	2.5	0.9	1576	256	8.6	1.4	1014	236	5.5	1.3	4615	353	25	1.7	3891	352	21.1	1.8	1370	221	7.4
0500000US39161	39161	Van Wert County, Ohio	11355	229	11355	(X)	7851	261	69.1	2.3	2995	166	26.4	1.4	6255	256	55.1	2.2	2193	214	19.3	1.8	518	123	4.6	1.1	228	80	2	0.7	1078	147	9.5	1.3	574	119	5.1	1	3504	288	30.9	2.3	2989	260	26.3	2.2	1371	144	12.1
0500000US39163	39163	Vinton County, Ohio	4992	219	4992	(X)	3462	182	69.4	3.2	1411	148	28.3	2.6	2697	200	54	3.9	931	130	18.6	2.4	211	58	4.2	1.2	135	55	2.7	1.1	554	116	11.1	2.2	345	99	6.9	1.9	1530	191	30.6	3.2	1293	165	25.9	2.8	651	101	13
0500000US39165	39165	Warren County, Ohio	78359	561	78359	(X)	58919	790	75.2	0.9	27492	607	35.1	0.7	49902	887	63.7	1.1	22218	657	28.4	0.8	2962	455	3.8	0.6	1654	341	2.1	0.4	6055	546	7.7	0.7	3620	392	4.6	0.5	19440	780	24.8	0.9	15882	816	20.3	1	6337	462	8.1
0500000US39167	39167	Washington County, Ohio	25064	390	25064	(X)	16380	458	65.4	1.7	5693	285	22.7	1	12977	435	51.8	1.7	4047	302	16.1	1.1	924	164	3.7	0.7	491	127	2	0.5	2479	237	9.9	0.9	1155	167	4.6	0.7	8684	472	34.6	1.7	7440	456	29.7	1.7	3062	263	12.2
0500000US39169	39169	Wayne County, Ohio	42910	426	42910	(X)	30420	547	70.9	1.1	12523	412	29.2	0.9	24728	558	57.6	1.3	9568	413	22.3	1	1785	255	4.2	0.6	690	155	1.6	0.4	3907	322	9.1	0.7	2265	298	5.3	0.7	12490	519	29.1	1.1	10860	488	25.3	1.1	4700	361	11
0500000US39171	39171	Williams County, Ohio	15150	295	15150	(X)	9818	297	64.8	1.8	4141	230	27.3	1.4	7579	276	50	1.9	2744	205	18.1	1.3	762	139	5	0.9	476	125	3.1	0.8	1477	204	9.7	1.3	921	156	6.1	1	5332	313	35.2	1.8	4448	312	29.4	1.9	1886	172	12.4
0500000US39173	39173	Wood County, Ohio	50091	541	50091	(X)	30997	631	61.9	1.2	13333	540	26.6	1	24774	649	49.5	1.3	9500	446	19	0.8	1878	279	3.7	0.5	1262	263	2.5	0.5	4345	379	8.7	0.8	2571	311	5.1	0.6	19094	654	38.1	1.2	14441	638	28.8	1.3	4810	333	9.6
0500000US39175	39175	Wyandot County, Ohio	9327	167	9327	(X)	6236	224	66.9	2.2	2422	157	26	1.7	4875	212	52.3	2.4	1692	145	18.1	1.6	446	114	4.8	1.2	195	77	2.1	0.8	915	136	9.8	1.4	535	104	5.7	1.1	3091	218	33.1	2.2	2400	196	25.7	2	1084	156	11.6
0500000US42001	42001	Adams County, Pennsylvania	38193	408	38193	(X)	27376	510	71.7	1.3	10199	384	26.7	1	22193	516	58.1	1.4	7590	343	19.9	0.9	1572	208	4.1	0.5	713	140	1.9	0.4	3611	313	9.5	0.8	1896	234	5	0.6	10817	520	28.3	1.3	9019	491	23.6	1.2	4088	238	10.7
0500000US42003	42003	Allegheny County, Pennsylvania	529534	1903	529534	(X)	305488	2068	57.7	0.4	122222	1550	23.1	0.3	224833	1870	42.5	0.3	82115	1444	15.5	0.3	18950	878	3.6	0.2	8249	643	1.6	0.1	61705	1349	11.7	0.3	31858	962	6	0.2	224046	2114	42.3	0.4	187039	1955	35.3	0.3	71582	1275	13.5
0500000US42005	42005	Armstrong County, Pennsylvania	28524	335	28524	(X)	19141	347	67.1	1	6441	294	22.6	1	14793	362	51.9	1.3	4267	222	15	0.8	1476	197	5.2	0.7	691	141	2.4	0.5	2872	244	10.1	0.8	1483	162	5.2	0.6	9383	332	32.9	1	8183	350	28.7	1.1	4273	264	15
0500000US42007	42007	Beaver County, Pennsylvania	70079	679	70079	(X)	46003	669	65.6	0.9	15938	526	22.7	0.7	34836	710	49.7	1.1	10503	410	15	0.6	3012	287	4.3	0.4	1335	219	1.9	0.3	8155	473	11.6	0.6	4100	357	5.9	0.5	24076	765	34.4	0.9	21051	802	30	1	10098	459	14.4
0500000US42009	42009	Bedford County, Pennsylvania	20000	222	20000	(X)	13911	264	69.6	1.4	4800	188	24	0.9	10993	267	55	1.4	3367	185	16.8	0.9	1109	145	5.5	0.7	507	111	2.5	0.6	1809	206	9	1	926	168	4.6	0.8	6089	306	30.4	1.4	5150	269	25.8	1.2	2671	201	13.4
0500000US42011	42011	Berks County, Pennsylvania	153312	873	153312	(X)	105998	963	69.1	0.6	45265	835	29.5	0.5	78875	1188	51.4	0.7	29656	872	19.3	0.5	8243	514	5.4	0.3	4278	385	2.8	0.3	18880	760	12.3	0.5	11331	635	7.4	0.4	47314	974	30.9	0.6	37989	921	24.8	0.6	17323	674	11.3
0500000US42013	42013	Blair County, Pennsylvania	51034	552	51034	(X)	32758	544	64.2	1	12393	406	24.3	0.8	24900	586	48.8	1.1	8354	346	16.4	0.7	2213	348	4.3	0.7	1051	210	2.1	0.4	5645	417	11.1	0.8	2988	292	5.9	0.6	18276	582	35.8	1	15668	569	30.7	1.1	7434	397	14.6
0500000US42015	42015	Bradford County, Pennsylvania	24358	294	24358	(X)	16651	428	68.4	1.6	5987	292	24.6	1.2	13027	432	53.5	1.7	4005	233	16.4	0.9	1299	161	5.3	0.7	684	118	2.8	0.5	2325	209	9.5	0.9	1298	186	5.3	0.8	7707	421	31.6	1.6	6349	348	26.1	1.4	2928	200	12
0500000US42017	42017	Bucks County, Pennsylvania	233066	1148	233066	(X)	166529	1264	71.5	0.5	66552	1027	28.6	0.4	135458	1557	58.1	0.6	52756	1153	22.6	0.5	8657	548	3.7	0.2	3404	345	1.5	0.1	22414	1112	9.6	0.5	10392	738	4.5	0.3	66537	1360	28.5	0.5	56089	1262	24.1	0.5	23897	826	10.3
0500000US42019	42019	Butler County, Pennsylvania	74476	587	74476	(X)	50775	665	68.2	0.9	20424	525	27.4	0.7	41487	759	55.7	0.9	15810	478	21.2	0.6	2930	295	3.9	0.4	1358	219	1.8	0.3	6358	511	8.5	0.7	3256	352	4.4	0.5	23701	766	31.8	0.9	19498	694	26.2	0.9	8222	472	11
0500000US42021	42021	Cambria County, Pennsylvania	57465	550	57465	(X)	36531	622	63.6	1	13149	494	22.9	0.8	27237	554	47.4	1	8449	342	14.7	0.6	2630	242	4.6	0.4	1204	170	2.1	0.3	6664	458	11.6	0.8	3496	340	6.1	0.6	20934	611	36.4	1	18400	562	32	0.9	8609	377	15
0500000US42023	42023	Cameron County, Pennsylvania	2170	93	2170	(X)	1320	94	60.8	3.4	446	65	20.6	2.7	988	74	45.5	3.2	221	31	10.2	1.5	125	40	5.8	1.8	77	36	3.5	1.6	207	50	9.5	2.1	148	44	6.8	1.9	850	83	39.2	3.4	729	74	33.6	3.1	355	52	16.4
0500000US42025	42025	Carbon County, Pennsylvania	25751	469	25751	(X)	17277	611	67.1	2	6146	379	23.9	1.3	13478	558	52.3	2	3970	321	15.4	1.2	1029	208	4	0.8	600	156	2.3	0.6	2770	345	10.8	1.3	1576	270	6.1	1	8474	542	32.9	2	6669	482	25.9	1.8	3302	308	12.8
0500000US42027	42027	Centre County, Pennsylvania	57183	788	57183	(X)	32532	653	56.9	1	12867	509	22.5	0.8	26624	700	46.6	1.1	9930	508	17.4	0.8	2173	352	3.8	0.6	854	197	1.5	0.3	3735	348	6.5	0.6	2083	302	3.6	0.5	24651	697	43.1	1	16350	707	28.6	1.2	4959	393	8.7
0500000US42029	42029	Chester County, Pennsylvania	186057	871	186057	(X)	130680	1136	70.2	0.6	59393	863	31.9	0.4	108573	1238	58.4	0.6	48327	778	26	0.4	6106	440	3.3	0.2	3031	367	1.6	0.2	16001	660	8.6	0.4	8035	513	4.3	0.3	55377	1100	29.8	0.6	43990	1105	23.6	0.6	17543	629	9.4
0500000US42031	42031	Clarion County, Pennsylvania	15830	250	15830	(X)	9906	269	62.6	1.5	3629	201	22.9	1.2	7956	263	50.3	1.5	2601	149	16.4	0.9	628	123	4	0.8	347	107	2.2	0.7	1322	166	8.4	1	681	138	4.3	0.9	5924	258	37.4	1.5	4438	251	28	1.6	1836	150	11.6
0500000US42033	42033	Clearfield County, Pennsylvania	31817	414	31817	(X)	21184	373	66.6	1.1	7666	350	24.1	1	16793	420	52.8	1.3	5323	333	16.7	1	1430	197	4.5	0.6	700	139	2.2	0.4	2961	281	9.3	0.9	1643	199	5.2	0.6	10633	423	33.4	1.1	9346	465	29.4	1.3	4376	258	13.8
0500000US42035	42035	Clinton County, Pennsylvania	14796	271	14796	(X)	9911	258	67	1.9	3779	221	25.5	1.4	7603	261	51.4	1.9	2449	181	16.6	1.2	688	151	4.6	1	428	144	2.9	1	1620	196	10.9	1.3	902	141	6.1	1	4885	327	33	1.9	3903	294	26.4	1.8	1892	157	12.8
0500000US42037	42037	Columbia County, Pennsylvania	26178	401	26178	(X)	16765	420	64	1.4	6223	305	23.8	1.1	13103	400	50.1	1.5	4226	247	16.1	0.9	1093	152	4.2	0.6	607	116	2.3	0.4	2569	292	9.8	1.1	1390	213	5.3	0.8	9413	407	36	1.4	7184	367	27.4	1.4	3245	202	12.4
0500000US42039	42039	Crawford County, Pennsylvania	34575	418	34575	(X)	23333	439	67.5	1.2	9037	318	26.1	0.8	18001	406	52.1	1.2	5974	303	17.3	0.9	1667	186	4.8	0.5	920	169	2.7	0.5	3665	295	10.6	0.8	2143	230	6.2	0.7	11242	458	32.5	1.2	9360	406	27.1	1.1	4203	243	12.2
0500000US42041	42041	Cumberland County, Pennsylvania	95950	666	95950	(X)	62224	810	64.9	0.7	24869	727	25.9	0.7	50530	841	52.7	0.9	18188	585	19	0.6	3340	373	3.5	0.4	1797	312	1.9	0.3	8354	575	8.7	0.6	4884	497	5.1	0.5	33726	774	35.1	0.7	28024	756	29.2	0.8	11152	518	11.6
0500000US42043	42043	Dauphin County, Pennsylvania	109623	840	109623	(X)	69264	1090	63.2	0.9	29647	832	27	0.7	48761	960	44.5	0.9	18200	635	16.6	0.6	5234	523	4.8	0.5	2812	421	2.6	0.4	15269	671	13.9	0.6	8635	566	7.9	0.5	40359	1070	36.8	0.9	33524	983	30.6	0.9	11962	541	10.9
0500000US42045	42045	Delaware County, Pennsylvania	203817	1082	203817	(X)	136633	1151	67	0.6	59328	981	29.1	0.5	97469	1312	47.8	0.6	40615	952	19.9	0.5	9412	515	4.6	0.3	4220	377	2.1	0.2	29752	969	14.6	0.5	14493	722	7.1	0.4	67184	1315	33	0.6	58053	1233	28.5	0.5	23876	848	11.7
0500000US42047	42047	Elk County, Pennsylvania	13244	246	13244	(X)	8556	305	64.6	2.1	3010	227	22.7	1.6	6675	261	50.4	2	2077	171	15.7	1.2	710	137	5.4	1	393	106	3	0.8	1171	179	8.8	1.3	540	137	4.1	1	4688	292	35.4	2.1	4273	295	32.3	2.1	1966	227	14.8
0500000US42049	42049	Erie County, Pennsylvania	109934	773	109934	(X)	69932	932	63.6	0.9	28633	857	26	0.8	50701	857	46.1	0.8	17400	657	15.8	0.6	4669	388	4.2	0.4	2422	324	2.2	0.3	14562	572	13.2	0.5	8811	547	8	0.5	40002	1082	36.4	0.9	32958	1093	30	0.9	12508	590	11.4
0500000US42051	42051	Fayette County, Pennsylvania	53997	605	53997	(X)	34500	652	63.9	1.2	12347	489	22.9	0.9	25103	644	46.5	1.2	7796	438	14.4	0.8	2701	305	5	0.6	1284	233	2.4	0.4	6696	409	12.4	0.7	3267	296	6.1	0.5	19497	708	36.1	1.2	17013	711	31.5	1.2	7543	451	14
0500000US42053	42053	Forest County, Pennsylvania	1974	211	1974	(X)	1167	131	59.1	3.4	117	68	5.9	3	984	104	49.8	3.7	67	40	3.4	1.8	29	22	1.5	1.1	3	14	0.2	0.7	154	49	7.8	2.2	47	30	2.4	1.4	807	117	40.9	3.4	710	98	36	3.4	430	54	21.8
0500000US42055	42055	Franklin County, Pennsylvania	58570	695	58570	(X)	40598	694	69.3	1	16592	546	28.3	0.9	32335	800	55.2	1.2	11595	487	19.8	0.8	2728	327	4.7	0.6	1471	253	2.5	0.4	5535	462	9.5	0.8	3526	370	6	0.6	17972	654	30.7	1	15338	645	26.2	1	6833	466	11.7
0500000US42057	42057	Fulton County, Pennsylvania	5960	143	5960	(X)	4161	120	69.8	1.5	1545	88	25.9	1.2	3356	118	56.3	1.8	1111	79	18.6	1.3	347	66	5.8	1.1	215	61	3.6	1	458	67	7.7	1.1	219	51	3.7	0.9	1799	109	30.2	1.5	1516	103	25.4	1.5	707	51	11.9
0500000US42059	42059	Greene County, Pennsylvania	14394	290	14394	(X)	9616	293	66.8	1.7	3450	205	24	1.2	7206	306	50.1	2	2299	194	16	1.3	701	168	4.9	1.2	322	110	2.2	0.8	1709	239	11.9	1.6	829	162	5.8	1.1	4778	281	33.2	1.7	3956	259	27.5	1.7	1782	202	12.4
0500000US42061	42061	Huntingdon County, Pennsylvania	17225	335	17225	(X)	11758	302	68.3	1.6	4569	207	26.5	1.1	9490	254	55.1	1.5	3247	187	18.9	1.1	745	104	4.3	0.6	459	91	2.7	0.5	1523	163	8.8	0.9	863	126	5	0.7	5467	316	31.7	1.6	4783	283	27.8	1.4	2305	165	13.4
0500000US42063	42063	Indiana County, Pennsylvania	34061	475	34061	(X)	21318	473	62.6	1.2	7477	351	22	1	17247	494	50.6	1.3	5655	342	16.6	0.9	1317	231	3.9	0.7	610	132	1.8	0.4	2754	262	8.1	0.8	1212	195	3.6	0.6	12743	458	37.4	1.2	9843	469	28.9	1.3	3948	320	11.6
0500000US42065	42065	Jefferson County, Pennsylvania	18479	268	18479	(X)	12293	249	66.5	1.1	4597	184	24.9	1	9698	227	52.5	1.1	3137	146	17	0.8	852	100	4.6	0.5	392	67	2.1	0.4	1743	145	9.4	0.8	1068	135	5.8	0.7	6186	241	33.5	1.1	5396	235	29.2	1.1	2593	143	14
0500000US42067	42067	Juniata County, Pennsylvania	9393	187	9393	(X)	6414	240	68.3	2.1	2365	172	25.2	1.7	5347	227	56.9	2.2	1852	139	19.7	1.4	372	85	4	0.9	160	56	1.7	0.6	695	109	7.4	1.1	353	76	3.8	0.8	2979	211	31.7	2.1	2458	204	26.2	2.1	1140	148	12.1
0500000US42069	42069	Lackawanna County, Pennsylvania	85034	712	85034	(X)	52407	737	61.6	0.8	20141	592	23.7	0.6	38241	834	45	1	13070	576	15.4	0.6	4043	405	4.8	0.5	1887	306	2.2	0.4	10123	551	11.9	0.6	5184	471	6.1	0.6	32627	784	38.4	0.8	27679	758	32.6	0.8	12061	494	14.2
0500000US42071	42071	Lancaster County, Pennsylvania	195330	1029	195330	(X)	137133	1261	70.2	0.6	55988	1016	28.7	0.5	111084	1400	56.9	0.7	41843	954	21.4	0.5	7256	607	3.7	0.3	3587	420	1.8	0.2	18793	839	9.6	0.4	10558	610	5.4	0.3	58197	1193	29.8	0.6	46865	1074	24	0.5	20794	832	10.6
0500000US42073	42073	Lawrence County, Pennsylvania	36435	426	36435	(X)	24228	533	66.5	1.2	8713	341	23.9	0.9	18024	494	49.5	1.2	5467	303	15	0.8	1661	207	4.6	0.6	736	164	2	0.4	4543	357	12.5	1	2510	253	6.9	0.7	12207	440	33.5	1.2	10741	429	29.5	1.2	4995	285	13.7
0500000US42075	42075	Lebanon County, Pennsylvania	52267	432	52267	(X)	35976	634	68.8	1.1	14502	457	27.7	0.8	27525	568	52.7	1.1	9714	411	18.6	0.8	2554	314	4.9	0.6	1183	209	2.3	0.4	5897	434	11.3	0.8	3605	383	6.9	0.7	16291	614	31.2	1.1	13813	553	26.4	1	6068	359	11.6
0500000US42077	42077	Lehigh County, Pennsylvania	133960	776	133960	(X)	89871	1134	67.1	0.8	39102	956	29.2	0.7	65610	1054	49	0.8	25609	801	19.1	0.6	6313	484	4.7	0.4	3135	454	2.3	0.3	17948	819	13.4	0.6	10358	670	7.7	0.5	44089	1225	32.9	0.8	36050	1145	26.9	0.8	14311	772	10.7
0500000US42079	42079	Luzerne County, Pennsylvania	128692	992	128692	(X)	81766	1099	63.5	0.8	31566	895	24.5	0.7	57247	936	44.5	0.7	18785	680	14.6	0.5	7282	536	5.7	0.4	3106	367	2.4	0.3	17237	643	13.4	0.5	9675	561	7.5	0.4	46926	1112	36.5	0.8	40978	1016	31.8	0.7	18868	616	14.7
0500000US42081	42081	Lycoming County, Pennsylvania	45906	411	45906	(X)	29537	596	64.3	1.2	11395	400	24.8	0.8	22598	474	49.2	1	7644	363	16.7	0.8	2012	227	4.4	0.5	1081	191	2.4	0.4	4927	376	10.7	0.8	2670	288	5.8	0.6	16369	585	35.7	1.2	13408	543	29.2	1.2	5505	385	12
0500000US42083	42083	McKean County, Pennsylvania	17400	321	17400	(X)	11034	293	63.4	1.5	4313	234	24.8	1.3	7754	257	44.6	1.4	2382	188	13.7	1.1	1104	181	6.3	1	670	144	3.9	0.8	2176	199	12.5	1.1	1261	163	7.2	0.9	6366	304	36.6	1.5	5365	292	30.8	1.5	2237	188	12.9
0500000US42085	42085	Mercer County, Pennsylvania	45546	573	45546	(X)	30174	580	66.2	1.2	11063	369	24.3	0.7	22757	549	50	1.3	7291	333	16	0.8	1820	241	4	0.5	978	201	2.1	0.4	5597	455	12.3	1	2794	320	6.1	0.7	15372	633	33.8	1.2	13494	557	29.6	1.1	6456	379	14.2
0500000US42087	42087	Mifflin County, Pennsylvania	18714	304	18714	(X)	12542	376	67	2	4722	217	25.2	1.1	9585	358	51.2	2	3115	207	16.6	1.1	839	168	4.5	0.9	526	147	2.8	0.8	2118	288	11.3	1.5	1081	229	5.8	1.2	6172	410	33	2	5053	332	27	1.6	2473	241	13.2
0500000US42089	42089	Monroe County, Pennsylvania	57297	938	57297	(X)	41743	1012	72.9	1.3	17013	772	29.7	1.2	31757	973	55.4	1.6	11661	666	20.4	1.1	3041	434	5.3	0.7	1618	331	2.8	0.6	6945	588	12.1	1	3734	434	6.5	0.7	15554	811	27.1	1.3	12010	747	21	1.3	4914	443	8.6
0500000US42091	42091	Montgomery County, Pennsylvania	308626	1020	308626	(X)	210938	1439	68.3	0.4	92603	1215	30	0.4	170290	1501	55.2	0.5	72681	1234	23.5	0.4	11398	658	3.7	0.2	5294	476	1.7	0.2	29250	843	9.5	0.3	14628	609	4.7	0.2	97688	1397	31.7	0.4	81563	1321	26.4	0.4	34958	953	11.3
0500000US42093	42093	Montour County, Pennsylvania	7380	176	7380	(X)	4657	198	63.1	2.5	1750	137	23.7	1.8	3641	170	49.3	2.4	1238	122	16.8	1.7	291	98	3.9	1.3	233	97	3.2	1.3	725	156	9.8	2.1	279	89	3.8	1.2	2723	210	36.9	2.5	2324	221	31.5	2.8	990	181	13.4
0500000US42095	42095	Northampton County, Pennsylvania	112927	750	112927	(X)	78401	889	69.4	0.7	31645	718	28	0.6	60335	965	53.4	0.9	22281	706	19.7	0.6	5122	462	4.5	0.4	2591	368	2.3	0.3	12944	584	11.5	0.5	6773	549	6	0.5	34526	853	30.6	0.7	28096	733	24.9	0.6	13008	596	11.5
0500000US42097	42097	Northumberland County, Pennsylvania	39375	550	39375	(X)	24849	588	63.1	1.3	9027	412	22.9	0.9	18892	446	48	1.1	5936	312	15.1	0.8	1817	324	4.6	0.8	852	209	2.2	0.5	4140	348	10.5	0.8	2239	272	5.7	0.7	14526	554	36.9	1.3	12564	530	31.9	1.2	5545	292	14.1
0500000US42099	42099	Perry County, Pennsylvania	18085	238	18085	(X)	12769	290	70.6	1.4	4931	202	27.3	1.1	10278	268	56.8	1.4	3485	181	19.3	1	747	133	4.1	0.7	334	72	1.8	0.4	1744	204	9.6	1.1	1112	169	6.1	0.9	5316	277	29.4	1.4	4284	256	23.7	1.4	1848	150	10.2
0500000US42101	42101	Philadelphia County, Pennsylvania	581050	2271	581050	(X)	309568	2909	53.3	0.4	132037	2487	22.7	0.4	159556	2497	27.5	0.4	59311	1721	10.2	0.3	31169	1322	5.4	0.2	12439	812	2.1	0.1	118843	2122	20.5	0.4	60287	1692	10.4	0.3	271482	2667	46.7	0.4	226670	2489	39	0.4	67300	1430	11.6
0500000US42103	42103	Pike County, Pennsylvania	21079	686	21079	(X)	15207	677	72.1	2	5191	386	24.6	1.5	12328	554	58.5	1.9	3890	319	18.5	1.3	924	219	4.4	1	311	98	1.5	0.5	1955	302	9.3	1.4	990	215	4.7	1	5872	459	27.9	2	4971	421	23.6	1.9	2286	253	10.8
0500000US42105	42105	Potter County, Pennsylvania	6669	169	6669	(X)	4353	147	65.3	1.7	1467	85	22	1.1	3519	135	52.8	1.8	1055	79	15.8	1.1	283	50	4.2	0.7	146	46	2.2	0.7	551	82	8.3	1.2	266	51	4	0.7	2316	133	34.7	1.7	2008	129	30.1	1.7	996	79	14.9
0500000US42107	42107	Schuylkill County, Pennsylvania	58554	701	58554	(X)	38066	560	65	0.9	14308	447	24.4	0.7	28351	560	48.4	1	9578	401	16.4	0.7	3084	277	5.3	0.5	1435	198	2.5	0.3	6631	403	11.3	0.7	3295	316	5.6	0.5	20488	690	35	0.9	17556	657	30	0.9	8126	439	13.9
0500000US42109	42109	Snyder County, Pennsylvania	14442	271	14442	(X)	10496	258	72.7	1.5	4098	224	28.4	1.4	8385	232	58.1	1.5	2846	183	19.7	1.2	753	120	5.2	0.8	419	92	2.9	0.6	1358	156	9.4	1	833	158	5.8	1.1	3946	244	27.3	1.5	3270	231	22.6	1.5	1586	118	11
0500000US42111	42111	Somerset County, Pennsylvania	29619	412	29619	(X)	20543	415	69.4	1.1	7237	268	24.4	0.8	16808	378	56.7	1.1	5442	266	18.4	0.9	1186	165	4	0.5	594	130	2	0.4	2549	261	8.6	0.9	1201	194	4.1	0.7	9076	373	30.6	1.1	7935	362	26.8	1.1	4222	263	14.3
0500000US42113	42113	Sullivan County, Pennsylvania	2669	123	2669	(X)	1659	104	62.2	2.9	474	58	17.8	1.8	1377	94	51.6	3.1	349	42	13.1	1.4	137	39	5.1	1.4	56	21	2.1	0.7	145	37	5.4	1.4	69	24	2.6	0.9	1010	91	37.8	2.9	882	81	33	2.8	406	51	15.2
0500000US42115	42115	Susquehanna County, Pennsylvania	17487	200	17487	(X)	11858	266	67.8	1.3	4050	184	23.2	1	9445	234	54	1.3	2865	156	16.4	0.9	917	108	5.2	0.6	461	80	2.6	0.4	1496	129	8.6	0.7	724	95	4.1	0.5	5629	235	32.2	1.3	4638	216	26.5	1.2	1911	143	10.9
0500000US42117	42117	Tioga County, Pennsylvania	16611	259	16611	(X)	11200	245	67.4	1.2	3964	182	23.9	1	8801	249	53	1.4	2723	152	16.4	0.9	975	120	5.9	0.7	453	87	2.7	0.5	1424	138	8.6	0.8	788	110	4.7	0.7	5411	227	32.6	1.2	4445	218	26.8	1.2	2048	163	12.3
0500000US42119	42119	Union County, Pennsylvania	14916	370	14916	(X)	10118	403	67.8	2.2	3904	297	26.2	1.9	8111	382	54.4	2.4	2666	201	17.9	1.4	781	215	5.2	1.5	450	128	3	0.9	1226	252	8.2	1.6	788	219	5.3	1.4	4798	359	32.2	2.2	3802	304	25.5	1.9	1671	205	11.2
0500000US42121	42121	Venango County, Pennsylvania	22129	328	22129	(X)	15068	321	68.1	1.3	5440	217	24.6	0.9	11482	300	51.9	1.3	3441	184	15.5	0.8	1085	127	4.9	0.6	544	90	2.5	0.4	2501	209	11.3	0.9	1455	159	6.6	0.7	7061	339	31.9	1.3	6223	323	28.1	1.3	2887	224	13
0500000US42123	42123	Warren County, Pennsylvania	17113	238	17113	(X)	11024	268	64.4	1.5	3624	207	21.2	1.2	8941	264	52.2	1.6	2618	186	15.3	1.1	654	88	3.8	0.5	305	71	1.8	0.4	1429	157	8.4	0.9	701	114	4.1	0.7	6089	281	35.6	1.5	5291	266	30.9	1.4	2367	163	13.8
0500000US42125	42125	Washington County, Pennsylvania	83739	709	83739	(X)	55321	715	66.1	0.8	20530	458	24.5	0.5	43750	778	52.2	1	14893	464	17.8	0.6	3134	322	3.7	0.4	1490	226	1.8	0.3	8437	509	10.1	0.6	4147	342	5	0.4	28418	808	33.9	0.8	23966	815	28.6	0.9	10764	498	12.9
0500000US42127	42127	Wayne County, Pennsylvania	19306	533	19306	(X)	13254	529	68.7	1.7	4448	313	23	1.3	10520	437	54.5	1.7	3026	249	15.7	1.2	936	188	4.8	0.9	505	154	2.6	0.8	1798	254	9.3	1.3	917	187	4.7	0.9	6052	335	31.3	1.7	5136	312	26.6	1.6	2569	248	13.3
0500000US42129	42129	Westmoreland County, Pennsylvania	151173	995	151173	(X)	100715	931	66.6	0.6	35506	680	23.5	0.4	79104	1067	52.3	0.7	24916	638	16.5	0.4	5829	439	3.9	0.3	2402	324	1.6	0.2	15782	622	10.4	0.4	8188	469	5.4	0.3	50458	1112	33.4	0.6	43721	1076	28.9	0.6	20660	734	13.7
0500000US42131	42131	Wyoming County, Pennsylvania	10894	216	10894	(X)	7357	222	67.5	1.6	2673	166	24.5	1.3	5619	204	51.6	1.7	1734	141	15.9	1.2	564	103	5.2	0.9	279	63	2.6	0.6	1174	133	10.8	1.2	660	119	6.1	1.1	3537	190	32.5	1.6	2863	202	26.3	1.8	1266	101	11.6
0500000US42133	42133	York County, Pennsylvania	167416	826	167416	(X)	116539	1299	69.6	0.7	48576	997	29	0.6	89543	1269	53.5	0.8	32882	922	19.6	0.6	8263	600	4.9	0.4	4586	478	2.7	0.3	18733	838	11.2	0.5	11108	680	6.6	0.4	50877	1253	30.4	0.7	41383	1041	24.7	0.6	17182	673	10.3
0500000US51001	51001	Accomack County, Virginia	13961	570	13961	(X)	9138	471	65.5	2.7	2978	284	21.3	1.8	6627	383	47.5	2.5	1773	230	12.7	1.6	658	204	4.7	1.4	192	100	1.4	0.7	1853	272	13.3	1.9	1013	210	7.3	1.5	4823	462	34.5	2.7	4147	398	29.7	2.5	1887	227	13.5
0500000US51003	51003	Albemarle County, Virginia	38853	835	38853	(X)	24854	652	64	1.4	10701	450	27.5	1.1	20555	665	52.9	1.6	8537	445	22	1.1	781	203	2	0.5	406	138	1	0.4	3518	404	9.1	1	1758	300	4.5	0.8	13999	666	36	1.4	11352	602	29.2	1.5	4219	397	10.9
0500000US51005	51005	Alleghany County, Virginia	6781	192	6781	(X)	4379	182	64.6	2.7	1419	129	20.9	1.8	3485	192	51.4	2.9	1059	113	15.6	1.7	315	103	4.6	1.5	121	77	1.8	1.1	579	124	8.5	1.8	239	84	3.5	1.2	2402	216	35.4	2.7	2078	186	30.6	2.5	1229	152	18.1
0500000US51007	51007	Amelia County, Virginia	4704	223	4704	(X)	3705	299	78.8	4.9	1212	195	25.8	3.7	2896	307	61.6	5.8	842	197	17.9	3.9	129	88	2.7	1.8	80	72	1.7	1.5	680	169	14.5	3.5	290	124	6.2	2.6	999	230	21.2	4.9	848	207	18	4.4	363	121	7.7
0500000US51009	51009	Amherst County, Virginia	12502	288	12502	(X)	8414	344	67.3	2.5	2811	242	22.5	1.8	6372	326	51	2.5	1881	188	15	1.4	371	109	3	0.9	194	79	1.6	0.6	1671	245	13.4	2	736	173	5.9	1.4	4088	346	32.7	2.5	3565	306	28.5	2.3	1515	195	12.1
0500000US51011	51011	Appomattox County, Virginia	5931	220	5931	(X)	4530	195	76.4	3.1	1659	187	28	3	3251	232	54.8	4.1	1076	174	18.1	2.9	333	118	5.6	1.9	118	72	2	1.2	946	146	16	2.5	465	120	7.8	2	1401	211	23.6	3.1	1246	202	21	3	698	122	11.8
0500000US51013	51013	Arlington County, Virginia	98441	1023	98441	(X)	45768	927	46.5	1	19869	772	20.2	0.8	37030	995	37.6	1	16063	643	16.3	0.7	3043	455	3.1	0.5	898	260	0.9	0.3	5695	542	5.8	0.6	2908	384	3	0.4	52673	1234	53.5	1	39200	1039	39.8	1	6984	464	7.1
0500000US51015	51015	Augusta County, Virginia	28150	481	28150	(X)	20731	658	73.6	1.9	7199	437	25.6	1.4	16692	593	59.3	1.9	5257	383	18.7	1.3	1324	225	4.7	0.8	608	164	2.2	0.6	2715	400	9.6	1.4	1334	262	4.7	0.9	7419	547	26.4	1.9	6459	513	22.9	1.8	2766	343	9.8
0500000US51017	51017	Bath County, Virginia	2146	171	2146	(X)	1179	171	54.9	10	468	165	21.8	8.5	1016	166	47.3	8.5	312	130	14.5	6.3	85	93	4	4.4	78	98	3.6	4.7	78	68	3.6	3.2	78	68	3.6	3.2	967	270	45.1	10	760	248	35.4	9.5	374	159	17.4
0500000US51019	51019	Bedford County, Virginia	30591	493	30591	(X)	21605	520	70.6	1.6	7678	369	25.1	1.2	17847	501	58.3	1.7	5732	368	18.7	1.2	1159	244	3.8	0.8	553	188	1.8	0.6	2599	341	8.5	1.1	1393	256	4.6	0.8	8986	556	29.4	1.6	7683	495	25.1	1.5	3344	303	10.9
0500000US51021	51021	Bland County, Virginia	2614	235	2614	(X)	1766	177	67.6	5.1	638	127	24.4	3.8	1401	161	53.6	5.6	507	112	19.4	3.4	119	58	4.6	2.1	11	15	0.4	0.5	246	77	9.4	2.9	120	69	4.6	2.7	848	169	32.4	5.1	770	140	29.5	4.4	408	105	15.6
0500000US51023	51023	Botetourt County, Virginia	12913	263	12913	(X)	9676	347	74.9	2.4	3263	240	25.3	1.7	8242	355	63.8	2.4	2704	241	20.9	1.7	348	162	2.7	1.2	81	48	0.6	0.4	1086	198	8.4	1.6	478	145	3.7	1.1	3237	325	25.1	2.4	2669	305	20.7	2.3	1278	202	9.9
0500000US51025	51025	Brunswick County, Virginia	5916	291	5916	(X)	3977	286	67.2	3.5	1314	196	22.2	2.8	2551	215	43.1	3.2	695	149	11.7	2.3	320	132	5.4	2.2	199	115	3.4	1.9	1106	169	18.7	2.6	420	111	7.1	1.8	1939	229	32.8	3.5	1743	221	29.5	3.4	842	152	14.2
0500000US51027	51027	Buchanan County, Virginia	9442	262	9442	(X)	6584	293	69.7	3	2222	263	23.5	2.7	4867	267	51.5	2.6	1396	202	14.8	2.1	416	128	4.4	1.4	198	89	2.1	0.9	1301	252	13.8	2.7	628	182	6.7	1.9	2858	313	30.3	3	2456	275	26	2.7	1182	180	12.5
0500000US51029	51029	Buckingham County, Virginia	5603	251	5603	(X)	3864	226	69	3.4	1426	187	25.5	3	2842	172	50.7	3.4	952	135	17	2.3	246	120	4.4	2.1	118	76	2.1	1.3	776	152	13.8	2.5	356	98	6.4	1.7	1739	222	31	3.4	1536	220	27.4	3.5	640	134	11.4
0500000US51031	51031	Campbell County, Virginia	21791	460	21791	(X)	15371	531	70.5	2.3	5816	397	26.7	1.8	11795	469	54.1	2.1	4020	366	18.4	1.7	885	236	4.1	1.1	382	135	1.8	0.6	2691	313	12.3	1.4	1414	254	6.5	1.1	6420	537	29.5	2.3	5584	518	25.6	2.2	2090	292	9.6
0500000US51033	51033	Caroline County, Virginia	10970	431	10970	(X)	8179	408	74.6	2.6	3145	343	28.7	2.6	5659	384	51.6	2.8	1965	258	17.9	2.1	679	179	6.2	1.6	234	107	2.1	1	1841	265	16.8	2.4	946	195	8.6	1.7	2791	309	25.4	2.6	2106	309	19.2	2.7	942	198	8.6
0500000US51035	51035	Carroll County, Virginia	12548	434	12548	(X)	8540	398	68.1	2.4	2804	303	22.3	2	6689	393	53.3	3	1814	243	14.5	1.8	582	170	4.6	1.3	328	150	2.6	1.2	1269	253	10.1	1.9	662	196	5.3	1.5	4008	347	31.9	2.4	3498	339	27.9	2.5	1709	258	13.6
0500000US51036	51036	Charles City County, Virginia	2883	82	2883	(X)	1863	97	64.6	3.4	494	67	17.1	2.3	1304	85	45.2	3.1	284	44	9.9	1.5	136	42	4.7	1.4	43	27	1.5	0.9	423	61	14.7	2.1	167	46	5.8	1.6	1020	108	35.4	3.4	873	110	30.3	3.5	417	62	14.5
0500000US51037	51037	Charlotte County, Virginia	4723	242	4723	(X)	3103	203	65.7	3.6	942	158	19.9	3.1	2180	225	46.2	4.6	541	134	11.5	2.7	243	92	5.1	1.9	114	63	2.4	1.3	680	118	14.4	2.5	287	84	6.1	1.7	1620	208	34.3	3.6	1389	212	29.4	3.8	746	119	15.8
0500000US51041	51041	Chesterfield County, Virginia	116797	806	116797	(X)	83901	1016	71.8	0.7	37964	854	32.5	0.7	64701	920	55.4	0.8	27465	724	23.5	0.6	4949	534	4.2	0.5	2579	402	2.2	0.3	14251	744	12.2	0.6	7920	557	6.8	0.5	32896	897	28.2	0.7	27699	878	23.7	0.7	9798	579	8.4
0500000US51043	51043	Clarke County, Virginia	5526	160	5526	(X)	3676	271	66.5	4.4	1368	178	24.8	3.2	2775	271	50.2	4.6	901	137	16.3	2.5	171	68	3.1	1.3	94	54	1.7	1	730	177	13.2	3.1	373	131	6.7	2.3	1850	249	33.5	4.4	1509	224	27.3	4	626	172	11.3
0500000US51045	51045	Craig County, Virginia	2214	185	2214	(X)	1348	153	60.9	7.5	435	104	19.6	4.6	1125	141	50.8	6.7	350	106	15.8	4.6	53	52	2.4	2.3	19	30	0.9	1.4	170	90	7.7	4.1	66	45	3	2	866	209	39.1	7.5	764	191	34.5	6.7	428	126	19.3
0500000US51047	51047	Culpeper County, Virginia	16515	357	16515	(X)	12430	421	75.3	2.3	5534	427	33.5	2.4	9593	419	58.1	2.7	3843	344	23.3	2.1	918	254	5.6	1.5	496	158	3	1	1919	326	11.6	1.9	1195	269	7.2	1.6	4085	408	24.7	2.3	3315	394	20.1	2.2	1383	201	8.4
0500000US51049	51049	Cumberland County, Virginia	4012	191	4012	(X)	2726	253	67.9	5.6	961	168	24	3.9	1790	218	44.6	5.2	566	144	14.1	3.4	310	133	7.7	3.3	141	81	3.5	2	626	138	15.6	3.3	254	118	6.3	2.9	1286	238	32.1	5.6	1099	232	27.4	5.5	499	139	12.4
0500000US51051	51051	Dickenson County, Virginia	6205	199	6205	(X)	4382	261	70.6	3.6	1542	152	24.9	2.4	3329	249	53.7	3.9	1120	132	18	2.2	429	109	6.9	1.7	203	76	3.3	1.2	624	139	10.1	2.1	219	80	3.5	1.3	1823	237	29.4	3.6	1665	233	26.8	3.6	663	122	10.7
0500000US51053	51053	Dinwiddie County, Virginia	9939	264	9939	(X)	7079	367	71.2	3.3	2774	259	27.9	2.4	4952	358	49.8	3.3	1694	213	17	2	496	130	5	1.3	182	83	1.8	0.8	1631	248	16.4	2.5	898	186	9	1.9	2860	343	28.8	3.3	2411	310	24.3	3	947	196	9.5
0500000US51057	51057	Essex County, Virginia	4332	201	4332	(X)	2716	218	62.7	4.7	876	154	20.2	3.2	2000	225	46.2	5.1	568	142	13.1	3.1	248	100	5.7	2.3	113	79	2.6	1.8	468	103	10.8	2.4	195	78	4.5	1.8	1616	231	37.3	4.7	1324	211	30.6	4.7	585	125	13.5
0500000US51059	51059	Fairfax County, Virginia	392355	1164	392355	(X)	280010	2054	71.4	0.5	136502	1662	34.8	0.4	228571	1978	58.3	0.5	112053	1663	28.6	0.4	15285	899	3.9	0.2	6231	562	1.6	0.1	36154	1151	9.2	0.3	18218	731	4.6	0.2	112345	2003	28.6	0.5	88074	1831	22.4	0.5	26338	889	6.7
0500000US51061	51061	Fauquier County, Virginia	23595	381	23595	(X)	17346	447	73.5	1.7	7227	319	30.6	1.2	14732	432	62.4	1.8	5928	286	25.1	1.2	815	182	3.5	0.8	404	134	1.7	0.6	1799	269	7.6	1.1	895	210	3.8	0.9	6249	430	26.5	1.7	5025	378	21.3	1.5	2165	256	9.2
0500000US51063	51063	Floyd County, Virginia	6271	276	6271	(X)	4278	262	68.2	4	1571	227	25.1	3.3	3704	228	59.1	3.7	1331	203	21.2	3.1	119	80	1.9	1.3	44	39	0.7	0.6	455	135	7.3	2.1	196	83	3.1	1.3	1993	289	31.8	4	1678	260	26.8	3.7	729	175	11.6
0500000US51065	51065	Fluvanna County, Virginia	9891	243	9891	(X)	7254	338	73.3	3.2	2639	246	26.7	2.4	5954	346	60.2	3.4	2020	222	20.4	2.3	425	154	4.3	1.5	289	141	2.9	1.4	875	197	8.8	2	330	137	3.3	1.4	2637	338	26.7	3.2	2179	309	22	2.9	938	208	9.5
0500000US51067	51067	Franklin County, Virginia	23189	459	23189	(X)	16588	598	71.5	2.2	5671	413	24.5	1.7	13371	493	57.7	2	4007	317	17.3	1.3	869	233	3.7	1	377	157	1.6	0.7	2348	357	10.1	1.5	1287	317	5.6	1.4	6601	522	28.5	2.2	5819	492	25.1	2.1	2691	349	11.6
0500000US51069	51069	Frederick County, Virginia	29455	397	29455	(X)	21743	630	73.8	1.9	9296	427	31.6	1.4	17701	627	60.1	2	7089	395	24.1	1.3	1178	234	4	0.8	632	206	2.1	0.7	2864	368	9.7	1.2	1575	304	5.3	1	7712	574	26.2	1.9	6034	470	20.5	1.6	2530	264	8.6
0500000US51071	51071	Giles County, Virginia	7230	213	7230	(X)	4853	209	67.1	2.2	1749	168	24.2	2.2	3500	243	48.4	3.1	1106	148	15.3	2	423	111	5.9	1.5	285	99	3.9	1.4	930	173	12.9	2.3	358	124	5	1.7	2377	180	32.9	2.2	1929	196	26.7	2.6	827	114	11.4
0500000US51073	51073	Gloucester County, Virginia	14280	352	14280	(X)	10210	346	71.5	2.3	3923	271	27.5	1.7	8297	378	58.1	2.7	3081	312	21.6	2.1	500	206	3.5	1.4	224	103	1.6	0.7	1413	248	9.9	1.8	618	194	4.3	1.4	4070	373	28.5	2.3	3421	346	24	2.2	1433	217	10
0500000US51075	51075	Goochland County, Virginia	8148	215	8148	(X)	6316	260	77.5	2.7	1930	152	23.7	1.9	5515	281	67.7	2.9	1545	155	19	1.9	203	106	2.5	1.3	94	78	1.2	1	598	178	7.3	2.2	291	129	3.6	1.6	1832	229	22.5	2.7	1661	223	20.4	2.7	616	159	7.6
0500000US51077	51077	Grayson County, Virginia	6795	318	6795	(X)	4392	275	64.6	3	1496	202	22	2.4	3346	218	49.2	3	943	145	13.9	1.9	337	117	5	1.7	172	95	2.5	1.4	709	153	10.4	2.1	381	127	5.6	1.8	2403	244	35.4	3	2131	223	31.4	2.8	1056	110	15.5
0500000US51079	51079	Greene County, Virginia	7111	228	7111	(X)	5050	297	71	3.9	1942	207	27.3	2.8	4170	361	58.6	4.8	1554	183	21.9	2.5	247	138	3.5	1.9	61	47	0.9	0.7	633	147	8.9	2.1	327	129	4.6	1.8	2061	299	29	3.9	1483	239	20.9	3.2	321	102	4.5
0500000US51081	51081	Greensville County, Virginia	3486	633	3486	(X)	2496	512	71.6	4.4	907	358	26	6.3	1663	350	47.7	5.2	484	287	13.9	6.1	232	188	6.7	4.4	105	98	3	2.5	601	129	17.2	4.4	318	103	9.1	3.3	990	207	28.4	4.4	856	185	24.6	4	489	110	14
0500000US51083	51083	Halifax County, Virginia	14300	398	14300	(X)	9329	405	65.2	2.5	3388	293	23.7	1.8	6698	378	46.8	2.7	2120	240	14.8	1.6	622	175	4.3	1.2	314	110	2.2	0.8	2009	227	14	1.5	954	222	6.7	1.5	4971	407	34.8	2.5	4580	396	32	2.4	2397	250	16.8
0500000US51085	51085	Hanover County, Virginia	37463	343	37463	(X)	28194	509	75.3	1.3	11769	373	31.4	1	23174	528	61.9	1.4	9515	329	25.4	0.9	1316	220	3.5	0.6	579	164	1.5	0.4	3704	342	9.9	0.9	1675	247	4.5	0.7	9269	509	24.7	1.3	7597	485	20.3	1.3	3350	274	8.9
0500000US51087	51087	Henrico County, Virginia	124589	874	124589	(X)	79485	1158	63.8	0.9	36656	1052	29.4	0.8	55907	1165	44.9	0.9	24094	802	19.3	0.6	5099	519	4.1	0.4	2317	369	1.9	0.3	18479	773	14.8	0.6	10245	591	8.2	0.5	45104	1149	36.2	0.9	37057	993	29.7	0.8	13540	629	10.9
0500000US51089	51089	Henry County, Virginia	22415	375	22415	(X)	14903	549	66.5	2	5221	422	23.3	1.7	10742	445	47.9	1.9	3128	259	14	1.1	1007	205	4.5	0.9	499	154	2.2	0.7	3154	364	14.1	1.5	1594	310	7.1	1.3	7512	441	33.5	2	6781	410	30.3	1.8	3179	270	14.2
0500000US51091	51091	Highland County, Virginia	1071	88	1071	(X)	696	61	65	7	144	47	13.4	4.7	574	58	53.6	6.1	107	35	10	3.5	34	19	3.2	1.7	11	10	1	1	88	51	8.2	4.9	26	30	2.4	2.8	375	97	35	7	323	96	30.2	7.2	184	59	17.2
0500000US51093	51093	Isle of Wight County, Virginia	13769	288	13769	(X)	10175	346	73.9	2.1	3824	247	27.8	1.7	8253	319	59.9	2.4	2835	234	20.6	1.8	502	120	3.6	0.9	236	93	1.7	0.7	1420	205	10.3	1.4	753	171	5.5	1.2	3594	304	26.1	2.1	2997	299	21.8	2.1	1374	161	10
0500000US51095	51095	James City County, Virginia	28000	480	28000	(X)	19872	558	71	1.9	6932	418	24.8	1.5	16037	578	57.3	2.1	5182	430	18.5	1.6	888	206	3.2	0.7	336	159	1.2	0.6	2947	403	10.5	1.4	1414	276	5.1	1	8128	565	29	1.9	6904	564	24.7	1.9	3396	386	12.1
0500000US51097	51097	King and Queen County, Virginia	2894	126	2894	(X)	1956	165	67.6	5.1	598	119	20.7	4	1436	148	49.6	4.8	429	105	14.8	3.5	127	78	4.4	2.7	0	17	0	1.1	393	106	13.6	3.6	169	78	5.8	2.7	938	156	32.4	5.1	790	147	27.3	4.7	425	102	14.7
0500000US51099	51099	King George County, Virginia	8379	245	8379	(X)	6353	292	75.8	2.8	2881	244	34.4	2.7	5191	289	62	3.4	2176	232	26	2.8	333	127	4	1.5	206	106	2.5	1.3	829	174	9.9	2	499	148	6	1.7	2026	246	24.2	2.8	1582	210	18.9	2.5	526	110	6.3
0500000US51101	51101	King William County, Virginia	6036	195	6036	(X)	4552	226	75.4	3.4	2137	209	35.4	3.2	3651	230	60.5	3.7	1637	185	27.1	2.9	225	86	3.7	1.4	180	77	3	1.3	676	157	11.2	2.6	320	107	5.3	1.7	1484	218	24.6	3.4	1229	195	20.4	3.1	459	101	7.6
0500000US51103	51103	Lancaster County, Virginia	5164	301	5164	(X)	3005	241	58.2	3.4	723	147	14	2.5	2286	207	44.3	3.6	418	106	8.1	2	200	97	3.9	1.8	134	88	2.6	1.6	519	119	10.1	2.2	171	71	3.3	1.3	2159	220	41.8	3.4	1915	208	37.1	3.5	1247	150	24.1
0500000US51105	51105	Lee County, Virginia	9445	411	9445	(X)	6381	390	67.6	2.8	2275	265	24.1	2.6	4865	368	51.5	3.1	1591	214	16.8	2.1	590	141	6.2	1.4	333	116	3.5	1.2	926	159	9.8	1.7	351	103	3.7	1.1	3064	292	32.4	2.8	2811	272	29.8	2.5	1358	194	14.4
0500000US51107	51107	Loudoun County, Virginia	113432	710	113432	(X)	87905	913	77.5	0.8	52515	881	46.3	0.7	74313	1019	65.5	0.9	44903	912	39.6	0.8	4051	460	3.6	0.4	1986	345	1.8	0.3	9541	709	8.4	0.6	5626	531	5	0.5	25527	915	22.5	0.8	19562	916	17.2	0.8	5315	391	4.7
0500000US51109	51109	Louisa County, Virginia	12829	394	12829	(X)	9271	352	72.3	2.5	3384	285	26.4	2.1	7474	424	58.3	3.3	2447	300	19.1	2.3	547	171	4.3	1.3	264	137	2.1	1.1	1250	248	9.7	1.9	673	205	5.2	1.6	3558	380	27.7	2.5	2789	355	21.7	2.4	1181	187	9.2
0500000US51111	51111	Lunenburg County, Virginia	4516	482	4516	(X)	3103	384	68.7	3.7	1050	258	23.3	3.8	2125	270	47.1	4.1	630	194	14	3.4	280	149	6.2	2.8	136	88	3	1.7	698	140	15.5	3.1	284	91	6.3	2	1413	215	31.3	3.7	1291	208	28.6	3.7	666	98	14.7
0500000US51113	51113	Madison County, Virginia	5003	223	5003	(X)	3406	249	68.1	4.6	1191	201	23.8	3.7	2688	258	53.7	5.1	921	205	18.4	3.9	173	82	3.5	1.6	99	70	2	1.4	545	154	10.9	3	171	96	3.4	1.9	1597	253	31.9	4.6	1301	222	26	4.1	588	174	11.8
0500000US51115	51115	Mathews County, Virginia	3806	299	3806	(X)	2685	253	70.5	5.4	625	150	16.4	3.9	2307	230	60.6	5.1	487	138	12.8	3.7	151	87	4	2.3	22	35	0.6	0.9	227	123	6	3.1	116	104	3	2.7	1121	246	29.5	5.4	997	238	26.2	5.5	592	166	15.6
0500000US51117	51117	Mecklenburg County, Virginia	12482	363	12482	(X)	7789	373	62.4	2.2	2523	235	20.2	1.8	5462	296	43.8	2.1	1543	183	12.4	1.4	434	125	3.5	1	102	56	0.8	0.5	1893	228	15.2	1.7	878	194	7	1.5	4693	302	37.6	2.2	4274	287	34.2	2.2	2186	228	17.5
0500000US51119	51119	Middlesex County, Virginia	4342	283	4342	(X)	2911	268	67	4.3	773	144	17.8	2.7	2336	231	53.8	4.4	585	131	13.5	2.7	177	82	4.1	1.8	43	36	1	0.8	398	101	9.2	2.2	145	66	3.3	1.4	1431	206	33	4.3	1227	186	28.3	3.8	705	144	16.2
0500000US51121	51121	Montgomery County, Virginia	35199	687	35199	(X)	19017	551	54	1.5	8243	491	23.4	1.4	15292	502	43.4	1.5	5989	401	17	1.1	1152	274	3.3	0.8	712	258	2	0.7	2573	378	7.3	1.1	1542	279	4.4	0.8	16182	711	46	1.5	9729	663	27.6	1.7	2661	355	7.6
0500000US51125	51125	Nelson County, Virginia	6339	291	6339	(X)	3997	317	63.1	4.4	1403	188	22.1	2.6	2811	292	44.3	4.8	769	150	12.1	2.4	242	108	3.8	1.7	70	42	1.1	0.7	944	240	14.9	3.5	564	178	8.9	2.7	2342	313	36.9	4.4	1872	299	29.5	4.5	959	206	15.1
0500000US51127	51127	New Kent County, Virginia	7299	190	7299	(X)	5659	240	77.5	3.1	2057	226	28.2	2.9	4639	299	63.6	3.9	1561	224	21.4	2.9	234	123	3.2	1.7	34	40	0.5	0.5	786	178	10.8	2.5	462	155	6.3	2.1	1640	243	22.5	3.1	1339	226	18.3	3	661	169	9.1
0500000US51131	51131	Northampton County, Virginia	5248	250	5248	(X)	3117	260	59.4	4.1	1009	158	19.2	2.7	2155	216	41.1	3.6	554	120	10.6	2.2	158	75	3	1.4	89	59	1.7	1.1	804	128	15.3	2.4	366	105	7	1.9	2131	238	40.6	4.1	1848	234	35.2	4	931	150	17.7
0500000US51133	51133	Northumberland County, Virginia	5861	334	5861	(X)	4020	299	68.6	4	1116	208	19	3.2	3185	266	54.3	4.4	729	167	12.4	2.8	163	108	2.8	1.9	61	68	1	1.2	672	214	11.5	3.4	326	172	5.6	2.8	1841	276	31.4	4	1637	267	27.9	4	920	204	15.7
0500000US51135	51135	Nottoway County, Virginia	5589	259	5589	(X)	3769	260	67.4	4.2	1428	201	25.6	3.2	2473	247	44.2	4.4	733	155	13.1	2.6	328	136	5.9	2.4	147	107	2.6	1.9	968	177	17.3	2.9	548	159	9.8	2.7	1820	264	32.6	4.2	1614	270	28.9	4.4	839	177	15
0500000US51137	51137	Orange County, Virginia	12810	319	12810	(X)	9308	476	72.7	3.3	3511	356	27.4	2.6	7268	402	56.7	3	2233	290	17.4	2.2	650	244	5.1	1.9	496	249	3.9	1.9	1390	235	10.9	1.8	782	187	6.1	1.4	3502	430	27.3	3.3	2985	394	23.3	3	1377	246	10.7
0500000US51139	51139	Page County, Virginia	9372	284	9372	(X)	6673	311	71.2	2.6	2336	215	24.9	2	4968	331	53	3.2	1519	207	16.2	2.1	559	178	6	1.9	368	157	3.9	1.7	1146	234	12.2	2.5	449	141	4.8	1.5	2699	259	28.8	2.6	2178	239	23.2	2.4	1082	134	11.5
0500000US51141	51141	Patrick County, Virginia	7790	306	7790	(X)	5073	342	65.1	3.4	1674	219	21.5	2.7	4006	335	51.4	3.4	1182	171	15.2	2.1	237	107	3	1.4	103	70	1.3	0.9	830	199	10.7	2.6	389	153	5	2	2717	279	34.9	3.4	2361	261	30.3	3.3	1169	198	15
0500000US51143	51143	Pittsylvania County, Virginia	26204	484	26204	(X)	18080	448	69	1.6	6262	432	23.9	1.5	13519	426	51.6	1.7	4166	393	15.9	1.5	1030	195	3.9	0.7	415	112	1.6	0.4	3531	332	13.5	1.2	1681	305	6.4	1.1	8124	500	31	1.6	7149	467	27.3	1.6	3182	269	12.1
0500000US51145	51145	Powhatan County, Virginia	9730	206	9730	(X)	7808	272	80.2	2.4	2962	218	30.4	2.1	6395	287	65.7	2.9	2370	200	24.4	2	398	143	4.1	1.4	123	85	1.3	0.9	1015	199	10.4	2	469	162	4.8	1.7	1922	240	19.8	2.4	1672	224	17.2	2.3	764	147	7.9
0500000US51147	51147	Prince Edward County, Virginia	7409	383	7409	(X)	4775	352	64.4	3.7	1788	288	24.1	3.5	3306	305	44.6	3.7	1036	129	14	1.7	372	160	5	2.1	190	134	2.6	1.8	1097	196	14.8	2.5	562	214	7.6	2.8	2634	313	35.6	3.7	1985	306	26.8	4	913	183	12.3
0500000US51149	51149	Prince George County, Virginia	11102	343	11102	(X)	8808	379	79.3	2.3	3873	366	34.9	2.9	6869	358	61.9	2.7	2758	308	24.8	2.6	709	182	6.4	1.6	485	152	4.4	1.4	1230	215	11.1	1.9	630	149	5.7	1.3	2294	267	20.7	2.3	2065	269	18.6	2.4	818	153	7.4
0500000US51153	51153	Prince William County, Virginia	136794	649	136794	(X)	105896	986	77.4	0.7	57919	1042	42.3	0.8	82368	1298	60.2	0.9	44802	1022	32.8	0.7	7787	716	5.7	0.5	4064	520	3	0.4	15741	755	11.5	0.6	9053	693	6.6	0.5	30898	1036	22.6	0.7	24609	883	18	0.6	6141	393	4.5
0500000US51155	51155	Pulaski County, Virginia	14619	370	14619	(X)	9847	433	67.4	2.5	2994	277	20.5	1.8	7361	410	50.4	2.7	1915	238	13.1	1.6	695	184	4.8	1.2	309	118	2.1	0.8	1791	286	12.3	1.9	770	192	5.3	1.3	4772	386	32.6	2.5	4024	364	27.5	2.4	1770	237	12.1
0500000US51157	51157	Rappahannock County, Virginia	3273	158	3273	(X)	2276	144	69.5	3.5	649	96	19.8	2.7	1923	155	58.8	4.3	518	93	15.8	2.8	191	81	5.8	2.4	85	53	2.6	1.6	162	73	4.9	2.2	46	46	1.4	1.4	997	130	30.5	3.5	844	125	25.8	3.5	324	99	9.9
0500000US51159	51159	Richmond County, Virginia	2875	204	2875	(X)	2038	176	70.9	4.1	677	153	23.5	4.4	1444	154	50.2	4.5	403	113	14	3.4	122	67	4.2	2.4	40	37	1.4	1.3	472	115	16.4	3.6	234	103	8.1	3.4	837	139	29.1	4.1	690	129	24	4.1	424	98	14.7
0500000US51161	51161	Roanoke County, Virginia	38164	371	38164	(X)	26027	573	68.2	1.5	10020	475	26.3	1.2	20375	596	53.4	1.6	7375	445	19.3	1.1	1674	296	4.4	0.8	870	231	2.3	0.6	3978	362	10.4	0.9	1775	307	4.7	0.8	12137	599	31.8	1.5	10503	554	27.5	1.4	4681	390	12.3
0500000US51163	51163	Rockbridge County, Virginia	9319	285	9319	(X)	6214	327	66.7	3.2	1928	208	20.7	2.1	5000	328	53.7	3.5	1423	203	15.3	2.1	434	150	4.7	1.6	220	123	2.4	1.3	780	183	8.4	1.9	285	136	3.1	1.4	3105	327	33.3	3.2	2482	321	26.6	3.3	1291	233	13.9
0500000US51165	51165	Rockingham County, Virginia	29625	334	29625	(X)	21349	460	72.1	1.4	7973	409	26.9	1.3	17241	512	58.2	1.7	6182	379	20.9	1.3	1242	212	4.2	0.7	443	113	1.5	0.4	2866	316	9.7	1	1348	223	4.6	0.7	8276	416	27.9	1.4	6740	351	22.8	1.2	3327	233	11.2
0500000US51167	51167	Russell County, Virginia	11045	268	11045	(X)	7376	406	66.8	3.4	2399	198	21.7	1.7	5782	369	52.3	3.1	1721	201	15.6	1.7	560	179	5.1	1.6	193	86	1.7	0.8	1034	233	9.4	2.1	485	146	4.4	1.3	3669	394	33.2	3.4	3367	396	30.5	3.5	1770	283	16
0500000US51169	51169	Scott County, Virginia	9379	303	9379	(X)	6476	271	69	2.3	2034	178	21.7	1.8	5187	265	55.3	2.6	1560	178	16.6	1.8	358	106	3.8	1.1	95	46	1	0.5	931	144	9.9	1.5	379	86	4	0.9	2903	247	31	2.3	2655	226	28.3	2.2	1364	160	14.5
0500000US51171	51171	Shenandoah County, Virginia	17096	372	17096	(X)	11758	366	68.8	1.9	4339	330	25.4	1.7	9194	433	53.8	2.6	2929	287	17.1	1.7	968	238	5.7	1.4	562	192	3.3	1.1	1596	266	9.3	1.5	848	215	5	1.2	5338	365	31.2	1.9	4616	344	27	1.8	2331	250	13.6
0500000US51173	51173	Smyth County, Virginia	12795	296	12795	(X)	8598	350	67.2	2.6	3117	263	24.4	1.9	6356	306	49.7	2.5	2017	183	15.8	1.4	753	133	5.9	1	341	101	2.7	0.8	1489	230	11.6	1.7	759	198	5.9	1.5	4197	364	32.8	2.6	3583	335	28	2.3	1570	208	12.3
0500000US51175	51175	Southampton County, Virginia	6682	240	6682	(X)	4916	249	73.6	2.9	2073	173	31	2.5	3509	224	52.5	3.3	1219	161	18.2	2.4	224	87	3.4	1.3	136	70	2	1	1183	179	17.7	2.5	718	142	10.7	2.1	1766	211	26.4	2.9	1496	200	22.4	2.9	625	116	9.4
0500000US51177	51177	Spotsylvania County, Virginia	42823	449	42823	(X)	33531	549	78.3	1.1	15178	492	35.4	1.1	26264	648	61.3	1.4	11236	565	26.2	1.3	1913	265	4.5	0.6	903	207	2.1	0.5	5354	477	12.5	1.1	3039	418	7.1	1	9292	495	21.7	1.1	7483	490	17.5	1.1	2988	255	7
0500000US51179	51179	Stafford County, Virginia	43405	515	43405	(X)	35578	581	82	1.2	18211	477	42	1.1	28814	680	66.4	1.5	13933	531	32.1	1.2	1792	239	4.1	0.5	1084	210	2.5	0.5	4972	509	11.5	1.2	3194	408	7.4	0.9	7827	559	18	1.2	6280	513	14.5	1.1	1904	238	4.4
0500000US51181	51181	Surry County, Virginia	2668	126	2668	(X)	1962	159	73.5	4.8	608	118	22.8	3.9	1430	144	53.6	5.1	374	98	14	3.5	129	65	4.8	2.4	78	47	2.9	1.8	403	113	15.1	4.1	156	76	5.8	2.7	706	134	26.5	4.8	594	123	22.3	4.5	252	91	9.4
0500000US51183	51183	Sussex County, Virginia	3149	533	3149	(X)	1912	345	60.7	3.6	629	199	20	3.3	1301	190	41.3	3.9	320	103	10.2	2.3	119	66	3.8	1.8	50	47	1.6	1.3	492	162	15.6	3.2	259	109	8.2	2.5	1237	239	39.3	3.6	1064	214	33.8	3.4	426	103	13.5
0500000US51185	51185	Tazewell County, Virginia	17832	331	17832	(X)	12044	410	67.5	2.1	4105	314	23	1.6	9366	445	52.5	2.4	3131	306	17.6	1.7	907	211	5.1	1.2	347	135	1.9	0.7	1771	263	9.9	1.5	627	154	3.5	0.9	5788	407	32.5	2.1	5115	394	28.7	2.1	2348	286	13.2
0500000US51187	51187	Warren County, Virginia	14364	341	14364	(X)	10108	431	70.4	2.7	4378	295	30.5	2	7552	420	52.6	2.5	3026	244	21.1	1.7	785	191	5.5	1.3	343	130	2.4	0.9	1771	232	12.3	1.6	1009	210	7	1.5	4256	404	29.6	2.7	3374	365	23.5	2.5	1370	217	9.5
0500000US51191	51191	Washington County, Virginia	22673	409	22673	(X)	15163	512	66.9	2	5559	328	24.5	1.3	11792	540	52	2.2	3892	338	17.2	1.4	915	213	4	0.9	404	146	1.8	0.6	2456	301	10.8	1.3	1263	217	5.6	1	7510	482	33.1	2	6607	477	29.1	1.9	2892	265	12.8
0500000US51193	51193	Westmoreland County, Virginia	6944	383	6944	(X)	4299	334	61.9	4.1	1149	206	16.5	2.6	3283	265	47.3	3.3	724	186	10.4	2.5	288	109	4.1	1.5	139	92	2	1.3	728	182	10.5	2.6	286	136	4.1	1.9	2645	345	38.1	4.1	2189	342	31.5	4.2	880	185	12.7
0500000US51195	51195	Wise County, Virginia	15254	319	15254	(X)	10180	475	66.7	2.7	3888	308	25.5	1.9	7538	414	49.4	2.6	2745	273	18	1.7	662	187	4.3	1.2	199	83	1.3	0.5	1980	288	13	1.8	944	216	6.2	1.4	5074	422	33.3	2.7	4370	392	28.6	2.6	1945	251	12.8
0500000US51197	51197	Wythe County, Virginia	11863	357	11863	(X)	7968	409	67.2	2.6	2934	313	24.7	2.4	6177	394	52.1	2.8	1893	294	16	2.3	592	180	5	1.5	372	157	3.1	1.3	1199	232	10.1	2	669	210	5.6	1.8	3895	323	32.8	2.6	3514	330	29.6	2.7	1691	238	14.3
0500000US51199	51199	York County, Virginia	23997	330	23997	(X)	18908	469	78.8	1.8	8190	410	34.1	1.6	15562	481	64.8	2	6451	401	26.9	1.7	704	190	2.9	0.8	337	130	1.4	0.5	2642	339	11	1.4	1402	255	5.8	1	5089	434	21.2	1.8	4166	359	17.4	1.5	1825	200	7.6
0500000US51510	51510	Alexandria city, Virginia	66879	816	66879	(X)	32393	839	48.4	1.2	14239	631	21.3	0.9	24221	734	36.2	1.1	9803	530	14.7	0.8	2450	355	3.7	0.5	1101	257	1.6	0.4	5722	511	8.6	0.8	3335	375	5	0.6	34486	950	51.6	1.2	28016	924	41.9	1.2	5099	367	7.6
0500000US51520	51520	Bristol city, Virginia	7718	254	7718	(X)	4901	311	63.5	3.6	2179	253	28.2	3	3129	257	40.5	3.4	966	177	12.5	2.3	417	134	5.4	1.7	286	122	3.7	1.6	1355	223	17.6	2.7	927	220	12	2.7	2817	296	36.5	3.6	2485	273	32.2	3.3	1324	162	17.2
0500000US51530	51530	Buena Vista city, Virginia	2737	134	2737	(X)	1778	195	65	6.2	958	163	35	5.9	1257	190	45.9	6.7	643	146	23.5	5.3	238	142	8.7	5.1	194	133	7.1	4.8	283	140	10.3	5.1	121	72	4.4	2.7	959	174	35	6.2	827	153	30.2	5.5	374	128	13.7
0500000US51540	51540	Charlottesville city, Virginia	17752	370	17752	(X)	7887	385	44.4	2.1	3601	313	20.3	1.8	5413	338	30.5	1.9	2178	226	12.3	1.3	591	153	3.3	0.9	341	123	1.9	0.7	1883	261	10.6	1.5	1082	222	6.1	1.2	9865	457	55.6	2.1	6535	467	36.8	2.5	1580	206	8.9
0500000US51550	51550	Chesapeake city, Virginia	81518	695	81518	(X)	61304	859	75.2	0.9	27417	832	33.6	0.9	44616	1052	54.7	1.2	18637	758	22.9	0.9	4038	508	5	0.6	1966	368	2.4	0.4	12650	777	15.5	1	6814	663	8.4	0.8	20214	811	24.8	0.9	16923	770	20.8	0.9	5590	439	6.9
0500000US51570	51570	Colonial Heights city, Virginia	7106	178	7106	(X)	4452	250	62.7	3.6	1786	185	25.1	2.5	3034	212	42.7	3	1080	170	15.2	2.4	381	126	5.4	1.8	200	100	2.8	1.4	1037	169	14.6	2.4	506	119	7.1	1.7	2654	284	37.3	3.6	2220	271	31.2	3.5	1112	173	15.6
0500000US51580	51580	Covington city, Virginia	2476	152	2476	(X)	1416	158	57.2	5.9	615	115	24.8	4.3	947	149	38.2	6.2	353	110	14.3	4.3	113	75	4.6	2.9	52	48	2.1	1.9	356	135	14.4	5.3	210	91	8.5	3.7	1060	173	42.8	5.9	971	159	39.2	5.6	427	90	17.2
0500000US51590	51590	Danville city, Virginia	18559	440	18559	(X)	10777	454	58.1	2.2	4075	318	22	1.6	6189	351	33.3	1.8	1732	224	9.3	1.2	920	192	5	1	359	119	1.9	0.6	3668	325	19.8	1.7	1984	259	10.7	1.4	7782	466	41.9	2.2	6876	410	37	2	2940	288	15.8
0500000US51595	51595	Emporia city, Virginia	2459	193	2459	(X)	1509	130	61.4	6.4	705	127	28.7	5.4	803	113	32.7	4.9	317	86	12.9	3.6	151	84	6.1	3.6	14	19	0.6	0.8	555	105	22.6	4.1	374	102	15.2	4.1	950	209	38.6	6.4	929	205	37.8	6.2	413	112	16.8
0500000US51600	51600	Fairfax city, Virginia	8467	146	8467	(X)	5789	253	68.4	2.8	2381	194	28.1	2.2	4645	277	54.9	3.1	1957	210	23.1	2.4	360	112	4.3	1.3	191	87	2.3	1	784	177	9.3	2.1	233	81	2.8	1	2678	240	31.6	2.8	1681	205	19.9	2.4	692	134	8.2
0500000US51610	51610	Falls Church city, Virginia	5166	150	5166	(X)	3281	198	63.5	4.3	1640	151	31.7	3	2752	222	53.3	4.6	1320	154	25.6	3	122	59	2.4	1.2	58	41	1.1	0.8	407	125	7.9	2.4	262	114	5.1	2.2	1885	248	36.5	4.3	1660	230	32.1	4	412	124	8
0500000US51620	51620	Franklin city, Virginia	3453	197	3453	(X)	2186	231	63.3	5.9	918	235	26.6	6.4	1065	191	30.8	5.6	427	152	12.4	4.3	139	84	4	2.4	0	17	0	0.9	982	212	28.4	5.7	491	175	14.2	4.8	1267	219	36.7	5.9	1152	229	33.4	6.2	517	119	15
0500000US51630	51630	Fredericksburg city, Virginia	10080	338	10080	(X)	5663	326	56.2	3.1	2913	327	28.9	3.2	3449	319	34.2	3	1514	226	15	2.2	261	119	2.6	1.2	89	74	0.9	0.7	1953	269	19.4	2.7	1310	271	13	2.7	4417	370	43.8	3.1	3597	361	35.7	3.2	914	170	9.1
0500000US51640	51640	Galax city, Virginia	2961	180	2961	(X)	1790	179	60.5	5.1	737	126	24.9	4.4	1094	143	36.9	5.3	374	92	12.6	3.4	183	92	6.2	3	92	63	3.1	2.2	513	155	17.3	4.8	271	121	9.2	4	1171	169	39.5	5.1	1074	174	36.3	5.4	463	112	15.6
0500000US51650	51650	Hampton city, Virginia	52940	835	52940	(X)	32902	712	62.1	1.1	13726	613	25.9	1	21015	698	39.7	1.3	7197	510	13.6	1	2100	344	4	0.6	1015	252	1.9	0.5	9787	565	18.5	1	5514	530	10.4	1	20038	695	37.9	1.1	16530	704	31.2	1.1	5590	394	10.6
0500000US51660	51660	Harrisonburg city, Virginia	16409	296	16409	(X)	8243	370	50.2	2.1	4129	267	25.2	1.6	5689	330	34.7	2	2469	258	15	1.6	991	250	6	1.5	696	224	4.2	1.4	1563	259	9.5	1.6	964	212	5.9	1.3	8166	380	49.8	2.1	4700	417	28.6	2.5	1322	165	8.1
0500000US51670	51670	Hopewell city, Virginia	8706	283	8706	(X)	5201	369	59.7	4	2282	287	26.2	3.2	2656	333	30.5	3.7	907	228	10.4	2.6	597	195	6.9	2.2	178	105	2	1.2	1948	323	22.4	3.7	1197	235	13.7	2.7	3505	373	40.3	4	3051	324	35	3.5	1225	175	14.1
0500000US51678	51678	Lexington city, Virginia	1638	1071	1638	(X)	790	427	48.2	9	306	169	18.7	4.9	586	327	35.8	8.3	159	104	9.7	4.6	0	17	0	2	0	17	0	2	204	135	12.5	5.4	147	106	9	4.7	848	668	51.8	9	751	552	45.8	7.2	422	242	25.8
0500000US51680	51680	Lynchburg city, Virginia	28528	537	28528	(X)	16366	614	57.4	1.9	7401	435	25.9	1.4	10779	436	37.8	1.4	4307	330	15.1	1.1	955	222	3.3	0.8	431	157	1.5	0.6	4632	440	16.2	1.5	2663	342	9.3	1.2	12162	587	42.6	1.9	9585	540	33.6	1.9	3592	301	12.6
0500000US51683	51683	Manassas city, Virginia	12433	264	12433	(X)	9194	412	73.9	3	4358	342	35.1	2.6	7076	359	56.9	2.6	3253	303	26.2	2.3	537	154	4.3	1.2	184	87	1.5	0.7	1581	259	12.7	2.1	921	230	7.4	1.8	3239	389	26.1	3	2662	367	21.4	2.8	812	135	6.5
0500000US51685	51685	Manassas Park city, Virginia	4723	98	4723	(X)	3383	235	71.6	4.7	1758	196	37.2	4	2582	289	54.7	6	1349	186	28.6	3.9	205	98	4.3	2.1	107	84	2.3	1.8	596	167	12.6	3.5	302	112	6.4	2.4	1340	221	28.4	4.7	1022	215	21.6	4.5	321	120	6.8
0500000US51690	51690	Martinsville city, Virginia	5857	207	5857	(X)	3238	245	55.3	3.8	1243	184	21.2	2.9	1894	178	32.3	3	497	119	8.5	2	197	80	3.4	1.4	113	63	1.9	1.1	1147	169	19.6	2.7	633	140	10.8	2.3	2619	244	44.7	3.8	2388	244	40.8	3.7	976	156	16.7
0500000US51700	51700	Newport News city, Virginia	69073	815	69073	(X)	42756	939	61.9	1.2	19648	766	28.4	1	26544	818	38.4	1.1	10286	596	14.9	0.8	3703	473	5.4	0.7	1805	355	2.6	0.5	12509	630	18.1	0.9	7557	592	10.9	0.9	26317	933	38.1	1.2	21935	905	31.8	1.2	6297	387	9.1
0500000US51710	51710	Norfolk city, Virginia	87045	1126	87045	(X)	50257	889	57.7	0.9	23392	645	26.9	0.7	29863	883	34.3	0.9	12102	559	13.9	0.6	4600	391	5.3	0.5	2079	283	2.4	0.3	15794	603	18.1	0.7	9211	444	10.6	0.5	36788	1025	42.3	0.9	28307	893	32.5	0.9	7960	394	9.1
0500000US51720	51720	Norton city, Virginia	1783	137	1783	(X)	955	131	53.6	7.8	381	117	21.4	6.6	582	115	32.6	6.5	217	92	12.2	5	90	58	5	3.2	17	28	1	1.6	283	110	15.9	6.3	147	91	8.2	5.1	828	175	46.4	7.8	697	143	39.1	6.8	212	105	11.9
0500000US51730	51730	Petersburg city, Virginia	12803	382	12803	(X)	7017	301	54.8	2.1	2599	264	20.3	1.9	3458	266	27	2	753	154	5.9	1.2	468	139	3.7	1.1	212	107	1.7	0.8	3091	277	24.1	2.1	1634	264	12.8	2	5786	349	45.2	2.1	4811	357	37.6	2.3	1629	178	12.7
0500000US51735	51735	Poquoson city, Virginia	4642	72	4642	(X)	3424	148	73.8	3.1	1313	151	28.3	3.1	2906	163	62.6	3.5	1053	135	22.7	2.8	126	58	2.7	1.3	47	36	1	0.8	392	130	8.4	2.8	213	110	4.6	2.4	1218	147	26.2	3.1	1027	145	22.1	3.1	462	104	10
0500000US51740	51740	Portsmouth city, Virginia	36757	559	36757	(X)	23230	652	63.2	1.5	9941	500	27	1.3	13210	569	35.9	1.4	4481	348	12.2	0.9	2009	306	5.5	0.8	863	209	2.3	0.6	8011	506	21.8	1.3	4597	424	12.5	1.1	13527	589	36.8	1.5	11595	579	31.5	1.5	4125	300	11.2
0500000US51750	51750	Radford city, Virginia	5477	400	5477	(X)	2397	226	43.8	3.2	980	216	17.9	3.4	1705	195	31.1	3	546	159	10	2.6	121	65	2.2	1.2	50	44	0.9	0.8	571	152	10.4	2.7	384	137	7	2.5	3080	307	56.2	3.2	1881	282	34.3	5.2	517	126	9.4
0500000US51760	51760	Richmond city, Virginia	87224	947	87224	(X)	40598	911	46.5	1	17768	681	20.4	0.7	20834	670	23.9	0.7	7426	448	8.5	0.5	3937	398	4.5	0.5	1498	259	1.7	0.3	15827	675	18.1	0.7	8844	537	10.1	0.6	46626	1012	53.5	1	36406	1040	41.7	1.1	9687	475	11.1
0500000US51770	51770	Roanoke city, Virginia	42239	588	42239	(X)	23614	639	55.9	1.4	9553	576	22.6	1.2	14175	528	33.6	1.3	4680	445	11.1	1	2117	371	5	0.9	881	247	2.1	0.6	7322	543	17.3	1.2	3992	466	9.5	1.1	18625	698	44.1	1.4	15439	687	36.6	1.5	5187	312	12.3
0500000US51775	51775	Salem city, Virginia	10045	261	10045	(X)	6327	318	63	3	2635	218	26.2	2	4646	362	46.3	3.5	1605	194	16	1.9	392	153	3.9	1.5	218	119	2.2	1.2	1289	227	12.8	2.3	812	166	8.1	1.7	3718	330	37	3	3192	297	31.8	2.7	1223	176	12.2
0500000US51790	51790	Staunton city, Virginia	10387	265	10387	(X)	5818	294	56	3	2168	211	20.9	2	4209	295	40.5	3	1235	173	11.9	1.7	357	114	3.4	1.1	213	97	2.1	0.9	1252	217	12.1	2.1	720	159	6.9	1.5	4569	362	44	3	3817	358	36.7	3.2	1780	224	17.1
0500000US51800	51800	Suffolk city, Virginia	30990	381	30990	(X)	22797	524	73.6	1.5	10462	464	33.8	1.4	16183	515	52.2	1.6	6869	419	22.2	1.3	1266	209	4.1	0.7	636	167	2.1	0.5	5348	400	17.3	1.3	2957	350	9.5	1.1	8193	481	26.4	1.5	6913	460	22.3	1.4	2677	220	8.6
0500000US51810	51810	Virginia Beach city, Virginia	166242	1143	166242	(X)	114380	1353	68.8	0.8	53519	1172	32.2	0.6	83801	1361	50.4	0.8	35940	1028	21.6	0.6	7209	639	4.3	0.4	3686	470	2.2	0.3	23370	868	14.1	0.5	13893	754	8.4	0.4	51862	1405	31.2	0.8	40414	1302	24.3	0.7	14113	585	8.5
0500000US51820	51820	Waynesboro city, Virginia	9031	249	9031	(X)	5672	352	62.8	3.7	2592	227	28.7	2.5	3685	307	40.8	3.4	1280	189	14.2	2.1	580	223	6.4	2.5	402	196	4.5	2.2	1407	222	15.6	2.4	910	216	10.1	2.4	3359	359	37.2	3.7	2793	309	30.9	3.2	1337	207	14.8
0500000US51830	51830	Williamsburg city, Virginia	4538	248	4538	(X)	2172	182	47.9	3.8	792	134	17.5	2.8	1649	192	36.3	3.8	448	121	9.9	2.5	123	45	2.7	1	51	32	1.1	0.7	400	118	8.8	2.6	293	116	6.5	2.6	2366	241	52.1	3.8	1876	203	41.3	3.9	661	127	14.6
0500000US51840	51840	Winchester city, Virginia	10608	278	10608	(X)	6040	286	56.9	2.3	2554	261	24.1	2.3	4103	289	38.7	2.7	1503	188	14.2	1.7	542	169	5.1	1.6	273	138	2.6	1.3	1395	228	13.2	2.1	778	211	7.3	2	4568	284	43.1	2.3	3562	316	33.6	2.8	1298	189	12.2
0500000US54001	54001	Barbour County, West Virginia	6041	242	6041	(X)	4239	268	70.2	3.2	1432	207	23.7	3.1	3340	261	55.3	3.6	935	163	15.5	2.5	209	76	3.5	1.3	152	69	2.5	1.1	690	157	11.4	2.5	345	121	5.7	2	1802	203	29.8	3.2	1472	175	24.4	2.8	685	125	11.3
0500000US54003	54003	Berkeley County, West Virginia	40991	525	40991	(X)	28781	749	70.2	1.8	12530	617	30.6	1.4	21120	685	51.5	1.6	7916	510	19.3	1.2	2533	324	6.2	0.8	1482	295	3.6	0.7	5128	557	12.5	1.4	3132	440	7.6	1.1	12210	781	29.8	1.8	10029	723	24.5	1.7	3249	317	7.9
0500000US54005	54005	Boone County, West Virginia	9547	230	9547	(X)	6692	272	70.1	2.4	2567	213	26.9	2	5066	271	53.1	2.6	1852	194	19.4	1.9	449	125	4.7	1.3	232	101	2.4	1.1	1177	206	12.3	2.1	483	134	5.1	1.4	2855	245	29.9	2.4	2510	226	26.3	2.3	1030	166	10.8
0500000US54007	54007	Braxton County, West Virginia	5607	243	5607	(X)	3800	265	67.8	3.5	1036	165	18.5	2.7	2987	228	53.3	3.7	714	123	12.7	2.1	340	128	6.1	2.2	137	70	2.4	1.2	473	105	8.4	1.8	185	76	3.3	1.3	1807	206	32.2	3.5	1591	193	28.4	3.5	727	133	13
0500000US54009	54009	Brooke County, West Virginia	10030	227	10030	(X)	6345	345	63.3	3.2	2061	220	20.5	2.1	4773	305	47.6	3	1386	202	13.8	2	587	161	5.9	1.6	210	92	2.1	0.9	985	197	9.8	1.9	465	145	4.6	1.4	3685	341	36.7	3.2	3239	337	32.3	3.2	1425	236	14.2
0500000US54011	54011	Cabell County, West Virginia	39973	593	39973	(X)	23048	682	57.7	1.6	9222	427	23.1	1	16295	648	40.8	1.5	5406	413	13.5	1	1812	284	4.5	0.7	916	212	2.3	0.5	4941	359	12.4	0.9	2900	273	7.3	0.7	16925	688	42.3	1.6	13863	561	34.7	1.2	5057	344	12.7
0500000US54013	54013	Calhoun County, West Virginia	3090	184	3090	(X)	2094	193	67.8	4.6	772	150	25	4.6	1648	179	53.3	5.1	528	128	17.1	4	151	82	4.9	2.6	71	50	2.3	1.6	295	95	9.5	3	173	71	5.6	2.3	996	153	32.2	4.6	842	139	27.2	4.3	488	113	15.8
0500000US54015	54015	Clay County, West Virginia	3460	158	3460	(X)	2422	165	70	4.2	849	176	24.5	4.9	2010	178	58.1	4.6	652	167	18.8	4.7	113	56	3.3	1.6	26	33	0.8	1	299	89	8.6	2.6	171	75	4.9	2.2	1038	160	30	4.2	749	131	21.6	3.6	389	81	11.2
0500000US54017	54017	Doddridge County, West Virginia	2674	191	2674	(X)	1760	177	65.8	5.1	502	121	18.8	4.1	1442	170	53.9	5.5	336	91	12.6	3.2	95	56	3.6	2	52	48	1.9	1.7	223	68	8.3	2.5	114	50	4.3	1.8	914	157	34.2	5.1	809	144	30.3	4.9	357	101	13.4
0500000US54019	54019	Fayette County, West Virginia	17669	401	17669	(X)	12065	429	68.3	2.2	4185	312	23.7	1.6	8814	474	49.9	2.7	2665	305	15.1	1.7	831	181	4.7	1	371	111	2.1	0.6	2420	308	13.7	1.7	1149	229	6.5	1.3	5604	440	31.7	2.2	4845	379	27.4	2	2059	244	11.7
0500000US54021	54021	Gilmer County, West Virginia	2744	301	2744	(X)	1725	168	62.9	4.3	580	84	21.1	2.8	1443	175	52.6	4.4	428	84	15.6	2.7	97	47	3.5	1.7	40	32	1.5	1.2	185	65	6.7	2.5	112	42	4.1	1.7	1019	197	37.1	4.3	797	200	29	4.9	424	153	15.5
0500000US54023	54023	Grant County, West Virginia	4175	211	4175	(X)	2770	180	66.3	3.5	814	139	19.5	3	2313	178	55.4	3.9	567	109	13.6	2.5	200	78	4.8	1.9	98	53	2.3	1.3	257	83	6.2	1.9	149	62	3.6	1.4	1405	174	33.7	3.5	1122	145	26.9	3.1	686	111	16.4
0500000US54025	54025	Greenbrier County, West Virginia	15339	336	15339	(X)	9873	351	64.4	2.2	3558	272	23.2	1.7	7283	371	47.5	2.3	2387	271	15.6	1.7	806	182	5.3	1.2	293	130	1.9	0.8	1784	234	11.6	1.5	878	186	5.7	1.2	5466	396	35.6	2.2	4719	372	30.8	2.2	2031	218	13.2
0500000US54027	54027	Hampshire County, West Virginia	10194	332	10194	(X)	4588	375	45	3.4	1479	226	14.5	2.1	3434	312	33.7	2.9	915	165	9	1.6	293	124	2.9	1.2	85	61	0.8	0.6	861	195	8.4	1.9	479	159	4.7	1.5	5606	386	55	3.4	5328	371	52.3	3.3	1775	219	17.4
0500000US54029	54029	Hancock County, West Virginia	12894	300	12894	(X)	8289	353	64.3	2.3	2817	243	21.8	1.8	6246	380	48.4	2.6	1870	234	14.5	1.7	451	139	3.5	1.1	172	99	1.3	0.8	1592	238	12.3	1.8	775	190	6	1.5	4605	313	35.7	2.3	4102	321	31.8	2.5	1927	228	14.9
0500000US54031	54031	Hardy County, West Virginia	5156	285	5156	(X)	3494	260	67.8	3.7	1115	170	21.6	3.1	2651	252	51.4	4.2	694	147	13.5	2.7	447	141	8.7	2.7	221	93	4.3	1.8	396	98	7.7	1.9	200	85	3.9	1.7	1662	221	32.2	3.7	1476	206	28.6	3.6	605	138	11.7
0500000US54033	54033	Harrison County, West Virginia	27502	396	27502	(X)	17775	489	64.6	1.7	6790	341	24.7	1.2	13668	466	49.7	1.6	4753	320	17.3	1.1	962	155	3.5	0.6	565	112	2.1	0.4	3145	312	11.4	1.1	1472	260	5.4	0.9	9727	523	35.4	1.7	8568	505	31.2	1.7	3690	282	13.4
0500000US54035	54035	Jackson County, West Virginia	11118	388	11118	(X)	7669	433	69	3	2635	323	23.7	2.7	6165	424	55.5	3	1903	264	17.1	2.1	363	126	3.3	1.1	111	80	1	0.7	1141	233	10.3	2.1	621	208	5.6	1.9	3449	348	31	3	2956	310	26.6	2.6	1502	228	13.5
0500000US54037	54037	Jefferson County, West Virginia	20331	321	20331	(X)	14353	378	70.6	1.7	6035	284	29.7	1.4	10999	419	54.1	2	4201	252	20.7	1.2	1046	202	5.1	1	503	140	2.5	0.7	2308	303	11.4	1.5	1331	250	6.5	1.2	5978	383	29.4	1.7	4663	361	22.9	1.7	1745	247	8.6
0500000US54039	54039	Kanawha County, West Virginia	82250	661	82250	(X)	50964	968	62	1.1	19139	661	23.3	0.8	35979	974	43.7	1.1	11318	544	13.8	0.6	3918	381	4.8	0.5	2124	319	2.6	0.4	11067	577	13.5	0.7	5697	471	6.9	0.6	31286	917	38	1.1	26669	867	32.4	1	10151	558	12.3
0500000US54041	54041	Lewis County, West Virginia	6526	221	6526	(X)	4383	248	67.2	3.4	1575	175	24.1	2.5	3255	279	49.9	4.2	962	169	14.7	2.5	367	112	5.6	1.7	179	88	2.7	1.3	761	148	11.7	2.3	434	121	6.7	1.8	2143	247	32.8	3.4	1750	217	26.8	3	862	135	13.2
0500000US54043	54043	Lincoln County, West Virginia	7994	332	7994	(X)	5462	348	68.3	3.3	1794	240	22.4	2.8	4231	375	52.9	4.2	1266	245	15.8	3	303	123	3.8	1.5	177	104	2.2	1.3	928	190	11.6	2.3	351	115	4.4	1.4	2532	286	31.7	3.3	2274	286	28.4	3.3	1005	193	12.6
0500000US54045	54045	Logan County, West Virginia	14043	350	14043	(X)	9860	432	70.2	2.4	3449	312	24.6	2	7350	460	52.3	3	2526	276	18	1.9	808	201	5.8	1.4	266	121	1.9	0.9	1702	234	12.1	1.6	657	163	4.7	1.1	4183	339	29.8	2.4	3549	328	25.3	2.3	1583	222	11.3
0500000US54047	54047	McDowell County, West Virginia	8180	262	8180	(X)	5400	258	66	2.3	1613	179	19.7	1.9	3621	252	44.3	3.2	956	136	11.7	1.6	518	143	6.3	1.7	142	58	1.7	0.7	1261	179	15.4	2	515	136	6.3	1.6	2780	211	34	2.3	2394	217	29.3	2.5	911	127	11.1
0500000US54049	54049	Marion County, West Virginia	22481	430	22481	(X)	14742	488	65.6	1.8	5491	328	24.4	1.3	11120	454	49.5	1.9	3592	286	16	1.2	1097	194	4.9	0.8	631	167	2.8	0.7	2525	292	11.2	1.3	1268	207	5.6	0.9	7739	425	34.4	1.8	6446	400	28.7	1.7	2958	235	13.2
0500000US54051	54051	Marshall County, West Virginia	13569	353	13569	(X)	9355	373	68.9	2.5	3041	262	22.4	1.9	7506	355	55.3	2.7	2113	253	15.6	1.9	566	163	4.2	1.2	345	134	2.5	1	1283	209	9.5	1.5	583	139	4.3	1	4214	383	31.1	2.5	3515	309	25.9	2.1	1626	230	12
0500000US54053	54053	Mason County, West Virginia	10838	374	10838	(X)	7244	418	66.8	3	2695	273	24.9	2.2	5496	402	50.7	3.2	1814	254	16.7	2.1	352	143	3.2	1.3	198	106	1.8	1	1396	273	12.9	2.5	683	174	6.3	1.6	3594	345	33.2	3	3100	288	28.6	2.5	1551	214	14.3
0500000US54055	54055	Mercer County, West Virginia	25451	381	25451	(X)	16753	610	65.8	2	6233	309	24.5	1.1	12311	590	48.4	2.2	3785	346	14.9	1.3	1125	214	4.4	0.8	579	151	2.3	0.6	3317	379	13	1.5	1869	313	7.3	1.2	8698	498	34.2	2	7415	452	29.1	1.8	3316	320	13
0500000US54057	54057	Mineral County, West Virginia	11265	267	11265	(X)	6435	397	57.1	3.1	2267	269	20.1	2.3	4841	382	43	3.1	1398	207	12.4	1.8	430	129	3.8	1.1	106	81	0.9	0.7	1164	200	10.3	1.8	763	190	6.8	1.7	4830	349	42.9	3.1	4569	342	40.6	3	1717	205	15.2
0500000US54059	54059	Mingo County, West Virginia	10844	247	10844	(X)	7572	345	69.8	2.9	2780	255	25.6	2.1	5655	339	52.1	2.9	1966	232	18.1	2	445	102	4.1	0.9	137	59	1.3	0.5	1472	224	13.6	2.1	677	174	6.2	1.6	3272	328	30.2	2.9	2914	303	26.9	2.7	1311	206	12.1
0500000US54061	54061	Monongalia County, West Virginia	37035	589	37035	(X)	19381	519	52.3	1.5	7908	424	21.4	1.1	14970	508	40.4	1.5	5667	377	15.3	1	1327	256	3.6	0.7	599	172	1.6	0.5	3084	337	8.3	0.9	1642	261	4.4	0.7	17654	699	47.7	1.5	13310	683	35.9	1.6	3024	270	8.2
0500000US54063	54063	Monroe County, West Virginia	5822	235	5822	(X)	4124	243	70.8	2.9	1421	189	24.4	2.9	3095	254	53.2	3.9	978	186	16.8	3	257	94	4.4	1.6	111	64	1.9	1.1	772	179	13.3	3	332	117	5.7	2	1698	180	29.2	2.9	1533	177	26.3	2.8	626	138	10.8
0500000US54065	54065	Morgan County, West Virginia	7348	335	7348	(X)	4007	315	54.5	4.3	1242	212	16.9	2.8	3317	301	45.1	4	1073	193	14.6	2.6	233	96	3.2	1.3	41	42	0.6	0.6	457	142	6.2	2	128	88	1.7	1.2	3341	386	45.5	4.3	2943	348	40.1	4	1284	201	17.5
0500000US54067	54067	Nicholas County, West Virginia	10787	316	10787	(X)	7576	371	70.2	2.9	2467	223	22.9	1.9	6013	341	55.7	2.9	1902	220	17.6	2	558	189	5.2	1.8	192	108	1.8	1	1005	196	9.3	1.7	373	143	3.5	1.3	3211	332	29.8	2.9	2728	345	25.3	3.1	1370	225	12.7
0500000US54069	54069	Ohio County, West Virginia	18408	333	18408	(X)	10574	385	57.4	1.8	3814	248	20.7	1.2	7902	329	42.9	1.8	2356	190	12.8	1	660	138	3.6	0.7	374	110	2	0.6	2012	245	10.9	1.3	1084	200	5.9	1.1	7834	366	42.6	1.8	6880	351	37.4	1.8	2863	214	15.6
0500000US54071	54071	Pendleton County, West Virginia	3095	181	3095	(X)	2009	162	64.9	3.6	654	98	21.1	2.6	1698	157	54.9	3.7	509	95	16.4	2.7	102	37	3.3	1.2	21	16	0.7	0.5	209	66	6.8	2.1	124	53	4	1.7	1086	130	35.1	3.6	918	116	29.7	3.4	504	92	16.3
0500000US54073	54073	Pleasants County, West Virginia	2893	118	2893	(X)	2090	137	72.2	4.4	741	99	25.6	3.2	1643	125	56.8	4.2	500	80	17.3	2.6	158	66	5.5	2.3	67	43	2.3	1.5	289	78	10	2.7	174	69	6	2.4	803	138	27.8	4.4	641	114	22.2	3.7	319	79	11
0500000US54075	54075	Pocahontas County, West Virginia	3737	179	3737	(X)	2365	149	63.3	3.7	738	100	19.7	2.5	1991	135	53.3	3.5	558	82	14.9	2.1	119	49	3.2	1.3	71	42	1.9	1.1	255	71	6.8	1.9	109	43	2.9	1.1	1372	172	36.7	3.7	1128	164	30.2	3.7	509	98	13.6
0500000US54077	54077	Preston County, West Virginia	12472	477	12472	(X)	8694	413	69.7	2.4	3030	258	24.3	1.8	7085	389	56.8	2.5	2263	236	18.1	1.7	598	150	4.8	1.2	255	94	2	0.7	1011	169	8.1	1.4	512	122	4.1	1	3778	355	30.3	2.4	3133	312	25.1	2.2	1521	201	12.2
0500000US54079	54079	Putnam County, West Virginia	21707	336	21707	(X)	15879	418	73.2	1.8	6698	338	30.9	1.4	12747	457	58.7	2.3	4892	379	22.5	1.8	855	230	3.9	1.1	493	175	2.3	0.8	2277	388	10.5	1.7	1313	296	6	1.3	5828	423	26.8	1.8	4979	389	22.9	1.7	1955	224	9
0500000US54081	54081	Raleigh County, West Virginia	31274	537	31274	(X)	20812	615	66.5	1.8	8141	496	26	1.5	15534	660	49.7	2.1	5313	463	17	1.4	1450	264	4.6	0.8	749	200	2.4	0.6	3828	416	12.2	1.3	2079	302	6.6	0.9	10462	638	33.5	1.8	8817	606	28.2	1.8	4030	352	12.9
0500000US54083	54083	Randolph County, West Virginia	11563	278	11563	(X)	7738	347	66.9	2.4	2603	240	22.5	2	6010	322	52	2.5	1689	196	14.6	1.7	567	148	4.9	1.3	302	110	2.6	0.9	1161	171	10	1.5	612	132	5.3	1.1	3825	282	33.1	2.4	3292	274	28.5	2.3	1477	187	12.8
0500000US54085	54085	Ritchie County, West Virginia	3942	181	3942	(X)	2520	176	63.9	3.9	841	101	21.3	2.3	1961	167	49.7	4.1	573	89	14.5	2.1	182	51	4.6	1.3	73	31	1.9	0.8	377	94	9.6	2.3	195	64	4.9	1.6	1422	174	36.1	3.9	1296	176	32.9	4.1	576	118	14.6
0500000US54087	54087	Roane County, West Virginia	5872	193	5872	(X)	3825	201	65.1	3.2	1356	110	23.1	1.8	3065	208	52.2	3.6	992	117	16.9	2	198	86	3.4	1.5	103	70	1.8	1.2	562	135	9.6	2.2	261	96	4.4	1.6	2047	215	34.9	3.2	1696	203	28.9	3.1	856	127	14.6
0500000US54089	54089	Summers County, West Virginia	5584	274	5584	(X)	3665	257	65.6	3.5	1236	199	22.1	3.1	2817	249	50.4	3.9	824	155	14.8	2.6	232	95	4.2	1.7	145	72	2.6	1.3	616	168	11	3	267	142	4.8	2.5	1919	220	34.4	3.5	1759	211	31.5	3.4	871	165	15.6
0500000US54091	54091	Taylor County, West Virginia	6732	200	6732	(X)	4609	273	68.5	3.3	1588	228	23.6	3.1	3505	283	52.1	3.7	1142	196	17	2.7	225	96	3.3	1.4	115	69	1.7	1	879	164	13.1	2.4	331	114	4.9	1.7	2123	220	31.5	3.3	1825	199	27.1	2.9	799	148	11.9
0500000US54093	54093	Tucker County, West Virginia	3010	143	3010	(X)	2034	151	67.6	4	754	107	25	3.2	1712	136	56.9	3.9	579	89	19.2	2.8	154	71	5.1	2.3	73	48	2.4	1.6	168	60	5.6	2	102	46	3.4	1.5	976	132	32.4	4	834	120	27.7	3.7	443	77	14.7
0500000US54095	54095	Tyler County, West Virginia	3616	172	3616	(X)	2403	151	66.5	3	693	104	19.2	2.6	1895	149	52.4	3.4	497	86	13.7	2.2	144	55	4	1.5	62	38	1.7	1	364	84	10.1	2.3	134	50	3.7	1.4	1213	126	33.5	3	1090	124	30.1	3	463	87	12.8
0500000US54097	54097	Upshur County, West Virginia	9093	271	9093	(X)	6281	341	69.1	3.2	2214	246	24.3	2.6	4870	315	53.6	3.1	1481	195	16.3	2.1	486	146	5.3	1.6	294	135	3.2	1.5	925	172	10.2	1.9	439	145	4.8	1.6	2812	299	30.9	3.2	2437	295	26.8	3.2	1018	172	11.2
0500000US54099	54099	Wayne County, West Virginia	16691	377	16691	(X)	10919	471	65.4	2.7	3915	306	23.5	1.7	7933	446	47.5	2.7	2552	320	15.3	1.9	851	233	5.1	1.4	439	161	2.6	1	2135	283	12.8	1.7	924	192	5.5	1.1	5772	491	34.6	2.7	5254	467	31.5	2.6	2284	311	13.7
0500000US54101	54101	Webster County, West Virginia	3887	180	3887	(X)	2632	183	67.7	4.1	932	125	24	2.8	1894	173	48.7	4.1	552	108	14.2	2.7	235	98	6	2.5	96	64	2.5	1.6	503	106	12.9	2.8	284	90	7.3	2.3	1255	181	32.3	4.1	1048	165	27	4	547	102	14.1
0500000US54103	54103	Wetzel County, West Virginia	6525	210	6525	(X)	4278	216	65.6	2.7	1284	167	19.7	2.4	3374	209	51.7	2.8	878	147	13.5	2.2	214	66	3.3	1	112	51	1.7	0.8	690	136	10.6	2.1	294	81	4.5	1.2	2247	195	34.4	2.7	1991	184	30.5	2.6	865	100	13.3
0500000US54105	54105	Wirt County, West Virginia	2430	142	2430	(X)	1607	149	66.1	5.9	488	96	20.1	3.9	1258	143	51.8	5.6	309	86	12.7	3.5	88	53	3.6	2.2	35	42	1.4	1.7	261	78	10.7	3.2	144	56	5.9	2.3	823	162	33.9	5.9	642	135	26.4	5.3	355	90	14.6
0500000US54107	54107	Wood County, West Virginia	36192	433	36192	(X)	23325	564	64.4	1.3	8860	397	24.5	1	17330	530	47.9	1.4	5567	385	15.4	1	1819	275	5	0.8	911	183	2.5	0.5	4176	373	11.5	1	2382	314	6.6	0.8	12867	509	35.6	1.3	11172	464	30.9	1.2	4735	323	13.1
0500000US54109	54109	Wyoming County, West Virginia	9199	233	9199	(X)	6504	322	70.7	3	2473	268	26.9	2.6	4971	327	54	3.3	1741	247	18.9	2.6	536	150	5.8	1.6	218	98	2.4	1.1	997	190	10.8	2.1	514	146	5.6	1.6	2695	290	29.3	3	2403	278	26.1	3	1084	191	11.8
[truncated: 561 more columns]
