# Supplementary material for: Evaluation of Policy Effectiveness by Mathematical Modeling for the Opioid Crisis with Spatial Study and Trend Analysis
Source: Healthcare (Basel). 2021 May 14;9(5):585. doi: 10.3390/healthcare9050585 (PMC8155830; doi:10.3390/healthcare9050585)
Supplement: Supplementary file 1 [file healthcare-09-00585-s001.zip › Table S8.xlsx]

## Sheet: Table S8
GEO.id	GEO.id2	GEO.display-label	HC01_VC03	HC02_VC03	HC03_VC03	HC04_VC03	HC01_VC04	HC02_VC04	HC03_VC04	HC04_VC04	HC01_VC05	HC02_VC05	HC03_VC05	HC04_VC05	HC01_VC06	HC02_VC06	HC03_VC06	HC04_VC06	HC01_VC07	HC02_VC07	HC03_VC07	HC04_VC07	HC01_VC08	HC02_VC08	HC03_VC08	HC04_VC08	HC01_VC09	HC02_VC09	HC03_VC09	HC04_VC09	HC01_VC10	HC02_VC10	HC03_VC10	HC04_VC10	HC01_VC11	HC02_VC11	HC03_VC11	HC04_VC11	HC01_VC12	HC02_VC12	HC03_VC12	HC04_VC12	HC01_VC13	HC02_VC13	HC03_VC13	HC04_VC13	HC01_VC14	HC02_VC14	HC03_VC14
Id	Id2	Geography	Estimate; HOUSEHOLDS BY TYPE - Total households	Margin of Error; HOUSEHOLDS BY TYPE - Total households	Percent; HOUSEHOLDS BY TYPE - Total households	Percent Margin of Error; HOUSEHOLDS BY TYPE - Total households	Estimate; HOUSEHOLDS BY TYPE - Total households - Family households (families)	Margin of Error; HOUSEHOLDS BY TYPE - Total households - Family households (families)	Percent; HOUSEHOLDS BY TYPE - Total households - Family households (families)	Percent Margin of Error; HOUSEHOLDS BY TYPE - Total households - Family households (families)	Estimate; HOUSEHOLDS BY TYPE - Total households - Family households (families) - With own children of the householder under 18 years	Margin of Error; HOUSEHOLDS BY TYPE - Total households - Family households (families) - With own children of the householder under 18 years	Percent; HOUSEHOLDS BY TYPE - Total households - Family households (families) - With own children of the householder under 18 years	Percent Margin of Error; HOUSEHOLDS BY TYPE - Total households - Family households (families) - With own children of the householder under 18 years	Estimate; HOUSEHOLDS BY TYPE - Total households - Family households (families) - Married-couple family	Margin of Error; HOUSEHOLDS BY TYPE - Total households - Family households (families) - Married-couple family	Percent; HOUSEHOLDS BY TYPE - Total households - Family households (families) - Married-couple family	Percent Margin of Error; HOUSEHOLDS BY TYPE - Total households - Family households (families) - Married-couple family	Estimate; HOUSEHOLDS BY TYPE - Total households - Family households (families) - Married-couple family - With own children of the householder under 18 years	Margin of Error; HOUSEHOLDS BY TYPE - Total households - Family households (families) - Married-couple family - With own children of the householder under 18 years	Percent; HOUSEHOLDS BY TYPE - Total households - Family households (families) - Married-couple family - With own children of the householder under 18 years	Percent Margin of Error; HOUSEHOLDS BY TYPE - Total households - Family households (families) - Married-couple family - With own children of the householder under 18 years	Estimate; HOUSEHOLDS BY TYPE - Total households - Family households (families) - Male householder, no wife present, family	Margin of Error; HOUSEHOLDS BY TYPE - Total households - Family households (families) - Male householder, no wife present, family	Percent; HOUSEHOLDS BY TYPE - Total households - Family households (families) - Male householder, no wife present, family	Percent Margin of Error; HOUSEHOLDS BY TYPE - Total households - Family households (families) - Male householder, no wife present, family	Estimate; HOUSEHOLDS BY TYPE - Total households - Family households (families) - Male householder, no wife present, family - With own children of the householder under 18 years	Margin of Error; HOUSEHOLDS BY TYPE - Total households - Family households (families) - Male householder, no wife present, family - With own children of the householder under 18 years	Percent; HOUSEHOLDS BY TYPE - Total households - Family households (families) - Male householder, no wife present, family - With own children of the householder under 18 years	Percent Margin of Error; HOUSEHOLDS BY TYPE - Total households - Family households (families) - Male householder, no wife present, family - With own children of the householder under 18 years	Estimate; HOUSEHOLDS BY TYPE - Total households - Family households (families) - Female householder, no husband present, family	Margin of Error; HOUSEHOLDS BY TYPE - Total households - Family households (families) - Female householder, no husband present, family	Percent; HOUSEHOLDS BY TYPE - Total households - Family households (families) - Female householder, no husband present, family	Percent Margin of Error; HOUSEHOLDS BY TYPE - Total households - Family households (families) - Female householder, no husband present, family	Estimate; HOUSEHOLDS BY TYPE - Total households - Family households (families) - Female householder, no husband present, family - With own children of the householder under 18 years	Margin of Error; HOUSEHOLDS BY TYPE - Total households - Family households (families) - Female householder, no husband present, family - With own children of the householder under 18 years	Percent; HOUSEHOLDS BY TYPE - Total households - Family households (families) - Female householder, no husband present, family - With own children of the householder under 18 years	Percent Margin of Error; HOUSEHOLDS BY TYPE - Total households - Family households (families) - Female householder, no husband present, family - With own children of the householder under 18 years	Estimate; HOUSEHOLDS BY TYPE - Total households - Nonfamily households	Margin of Error; HOUSEHOLDS BY TYPE - Total households - Nonfamily households	Percent; HOUSEHOLDS BY TYPE - Total households - Nonfamily households	Percent Margin of Error; HOUSEHOLDS BY TYPE - Total households - Nonfamily households	Estimate; HOUSEHOLDS BY TYPE - Total households - Nonfamily households - Householder living alone	Margin of Error; HOUSEHOLDS BY TYPE - Total households - Nonfamily households - Householder living alone	Percent; HOUSEHOLDS BY TYPE - Total households - Nonfamily households - Householder living alone	Percent Margin of Error; HOUSEHOLDS BY TYPE - Total households - Nonfamily households - Householder living alone	Estimate; HOUSEHOLDS BY TYPE - Total households - Nonfamily households - Householder living alone - 65 years and over	Margin of Error; HOUSEHOLDS BY TYPE - Total households - Nonfamily households - Householder living alone - 65 years and over	Percent; HOUSEHOLDS BY TYPE - Total households - Nonfamily households - Householder living alone - 65 years and over
0500000US21001	21001	Adair County, Kentucky	7126	253	7126	(X)	4934	240	69.2	3.3	1762	180	24.7	2.4	3951	223	55.4	3.5	1317	165	18.5	2.3	250	87	3.5	1.2	113	60	1.6	0.8	733	155	10.3	2.1	332	98	4.7	1.4	2192	275	30.8	3.3	1992	266	28	3.3	858	161	12
0500000US21003	21003	Allen County, Kentucky	7705	255	7705	(X)	5561	267	72.2	2.9	2397	198	31.1	2.3	4447	283	57.7	3.6	1771	187	23	2.4	301	81	3.9	1	191	67	2.5	0.9	813	172	10.6	2.2	435	139	5.6	1.8	2144	243	27.8	2.9	1922	234	24.9	2.8	848	131	11
0500000US21005	21005	Anderson County, Kentucky	8554	210	8554	(X)	6016	281	70.3	3.1	2551	224	29.8	2.4	4773	287	55.8	3.2	1804	249	21.1	2.8	333	149	3.9	1.7	181	136	2.1	1.6	910	206	10.6	2.4	566	177	6.6	2.1	2538	286	29.7	3.1	2084	252	24.4	2.8	998	156	11.7
0500000US21007	21007	Ballard County, Kentucky	3252	132	3252	(X)	2134	147	65.6	3.5	767	99	23.6	2.7	1716	136	52.8	3.7	522	94	16.1	2.7	114	44	3.5	1.3	42	28	1.3	0.9	304	66	9.3	2	203	54	6.2	1.6	1118	118	34.4	3.5	993	120	30.5	3.6	480	86	14.8
0500000US21009	21009	Barren County, Kentucky	16766	365	16766	(X)	11555	439	68.9	2.1	4787	320	28.6	1.7	8865	469	52.9	2.4	3203	346	19.1	2	572	180	3.4	1.1	257	137	1.5	0.8	2118	266	12.6	1.6	1327	240	7.9	1.4	5211	363	31.1	2.1	4628	342	27.6	2	1996	237	11.9
0500000US21011	21011	Bath County, Kentucky	4450	221	4450	(X)	3123	263	70.2	4.3	1148	174	25.8	3.3	2366	214	53.2	3.9	788	142	17.7	2.8	166	84	3.7	1.8	109	58	2.4	1.3	591	128	13.3	2.8	251	80	5.6	1.8	1327	191	29.8	4.3	1062	172	23.9	3.8	529	120	11.9
0500000US21013	21013	Bell County, Kentucky	10978	359	10978	(X)	7104	383	64.7	2.8	3027	304	27.6	2.5	4618	366	42.1	3.2	1824	246	16.6	2.1	663	130	6	1.2	250	98	2.3	0.9	1823	282	16.6	2.4	953	181	8.7	1.6	3874	338	35.3	2.8	3368	317	30.7	2.7	1554	189	14.2
0500000US21015	21015	Boone County, Kentucky	45649	474	45649	(X)	34536	711	75.7	1.5	16691	600	36.6	1.2	26659	716	58.4	1.5	12023	535	26.3	1.1	2502	379	5.5	0.8	1521	295	3.3	0.6	5375	479	11.8	1	3147	433	6.9	0.9	11113	692	24.3	1.5	9104	598	19.9	1.3	3209	326	7
0500000US21017	21017	Bourbon County, Kentucky	8043	200	8043	(X)	5241	242	65.2	2.9	2327	220	28.9	2.7	3683	210	45.8	2.8	1420	199	17.7	2.5	489	136	6.1	1.7	198	86	2.5	1.1	1069	190	13.3	2.3	709	166	8.8	2	2802	257	34.8	2.9	2339	234	29.1	2.7	951	187	11.8
0500000US21019	21019	Boyd County, Kentucky	19386	385	19386	(X)	13207	446	68.1	1.9	4941	343	25.5	1.7	9790	506	50.5	2.4	3196	327	16.5	1.6	1146	222	5.9	1.2	548	175	2.8	0.9	2271	323	11.7	1.6	1197	244	6.2	1.2	6179	387	31.9	1.9	5329	351	27.5	1.8	2205	222	11.4
0500000US21021	21021	Boyle County, Kentucky	10882	244	10882	(X)	7137	296	65.6	2.3	2669	238	24.5	2.1	5569	292	51.2	2.4	1871	179	17.2	1.6	377	108	3.5	1	148	88	1.4	0.8	1191	182	10.9	1.6	650	142	6	1.3	3745	268	34.4	2.3	3272	246	30.1	2.2	1375	202	12.6
0500000US21023	21023	Bracken County, Kentucky	3412	99	3412	(X)	2222	118	65.1	3.3	948	98	27.8	2.7	1720	120	50.4	3.6	694	91	20.3	2.6	152	60	4.5	1.7	53	31	1.6	0.9	350	79	10.3	2.3	201	62	5.9	1.8	1190	126	34.9	3.3	987	116	28.9	3	443	75	13
0500000US21025	21025	Breathitt County, Kentucky	5304	159	5304	(X)	3443	185	64.9	2.8	1213	135	22.9	2.3	2277	161	42.9	3.1	783	116	14.8	2.2	321	94	6.1	1.7	73	39	1.4	0.7	845	115	15.9	2	357	72	6.7	1.3	1861	157	35.1	2.8	1720	156	32.4	2.8	561	92	10.6
0500000US21027	21027	Breckinridge County, Kentucky	7343	224	7343	(X)	5072	220	69.1	2.6	1663	166	22.6	2.1	4117	236	56.1	3.1	1233	160	16.8	2.1	328	108	4.5	1.5	116	53	1.6	0.7	627	118	8.5	1.6	314	90	4.3	1.2	2271	220	30.9	2.6	1858	209	25.3	2.6	811	129	11
0500000US21029	21029	Bullitt County, Kentucky	28533	325	28533	(X)	21136	426	74.1	1.4	8392	379	29.4	1.3	15994	495	56.1	1.7	5551	366	19.5	1.3	1670	304	5.9	1.1	933	236	3.3	0.8	3472	360	12.2	1.3	1908	295	6.7	1	7397	410	25.9	1.4	6082	365	21.3	1.2	2427	254	8.5
0500000US21031	21031	Butler County, Kentucky	5153	158	5153	(X)	3595	194	69.8	3.5	1519	146	29.5	2.8	2721	180	52.8	3.3	1015	129	19.7	2.4	273	85	5.3	1.6	108	58	2.1	1.1	601	130	11.7	2.5	396	100	7.7	2	1558	197	30.2	3.5	1345	189	26.1	3.5	567	97	11
0500000US21033	21033	Caldwell County, Kentucky	5322	204	5322	(X)	3843	248	72.2	4.5	1277	212	24	3.9	2789	243	52.4	4.9	780	142	14.7	2.7	157	92	3	1.7	40	45	0.8	0.8	897	187	16.9	3.4	457	145	8.6	2.7	1479	262	27.8	4.5	1300	258	24.4	4.5	628	181	11.8
0500000US21035	21035	Calloway County, Kentucky	15002	352	15002	(X)	8685	364	57.9	2.3	3548	264	23.7	1.8	6838	333	45.6	2.1	2544	243	17	1.6	514	158	3.4	1	278	110	1.9	0.7	1333	186	8.9	1.2	726	164	4.8	1.1	6317	393	42.1	2.3	5158	388	34.4	2.4	1932	243	12.9
0500000US21037	21037	Campbell County, Kentucky	35954	478	35954	(X)	23253	537	64.7	1.7	9846	421	27.4	1.2	16856	561	46.9	1.8	6522	363	18.1	1.1	1737	267	4.8	0.7	738	180	2.1	0.5	4660	382	13	1	2586	331	7.2	0.9	12701	693	35.3	1.7	10315	597	28.7	1.5	3560	309	9.9
0500000US21039	21039	Carlisle County, Kentucky	2088	102	2088	(X)	1381	83	66.1	3.2	487	67	23.3	3.2	1087	92	52.1	3.9	359	63	17.2	3	127	33	6.1	1.6	62	31	3	1.5	167	50	8	2.4	66	32	3.2	1.5	707	83	33.9	3.2	632	81	30.3	3.3	354	64	17
0500000US21041	21041	Carroll County, Kentucky	4030	157	4030	(X)	2609	216	64.7	5.1	1074	160	26.7	3.8	1941	215	48.2	5.3	658	114	16.3	2.8	270	124	6.7	3.1	188	109	4.7	2.7	398	92	9.9	2.2	228	78	5.7	1.9	1421	222	35.3	5.1	1150	211	28.5	4.9	380	115	9.4
0500000US21043	21043	Carter County, Kentucky	10647	275	10647	(X)	7522	336	70.6	2.5	2826	264	26.5	2.2	5630	305	52.9	2.7	1997	204	18.8	1.8	460	150	4.3	1.4	163	78	1.5	0.7	1432	238	13.4	2.2	666	180	6.3	1.7	3125	269	29.4	2.5	2718	257	25.5	2.3	1360	192	12.8
0500000US21045	21045	Casey County, Kentucky	6412	179	6412	(X)	4352	271	67.9	3.6	1620	179	25.3	2.6	3541	267	55.2	3.7	1306	185	20.4	2.8	292	102	4.6	1.6	86	46	1.3	0.7	519	128	8.1	2	228	88	3.6	1.4	2060	234	32.1	3.6	1893	238	29.5	3.7	861	127	13.4
0500000US21047	21047	Christian County, Kentucky	25382	519	25382	(X)	17519	574	69	2	9014	557	35.5	2	12714	551	50.1	2	6310	463	24.9	1.7	1218	260	4.8	1	475	149	1.9	0.6	3587	337	14.1	1.3	2229	296	8.8	1.2	7863	554	31	2	6677	449	26.3	1.6	2402	235	9.5
0500000US21049	21049	Clark County, Kentucky	14183	274	14183	(X)	9814	329	69.2	2.1	3551	275	25	1.9	7173	342	50.6	2.3	2290	267	16.1	1.8	793	224	5.6	1.6	296	117	2.1	0.8	1848	275	13	1.9	965	157	6.8	1.1	4369	312	30.8	2.1	3407	290	24	2	1452	174	10.2
0500000US21051	21051	Clay County, Kentucky	7679	225	7679	(X)	5362	279	69.8	2.8	2145	234	27.9	2.8	3632	292	47.3	3.4	1416	217	18.4	2.7	423	118	5.5	1.5	115	62	1.5	0.8	1307	210	17	2.7	614	174	8	2.2	2317	217	30.2	2.8	2141	219	27.9	2.8	793	129	10.3
0500000US21053	21053	Clinton County, Kentucky	3863	199	3863	(X)	2584	228	66.9	4.7	1087	157	28.1	3.7	1887	208	48.8	4.8	699	136	18.1	3.4	249	86	6.4	2.2	153	71	4	1.8	448	118	11.6	3	235	89	6.1	2.3	1279	189	33.1	4.7	1224	181	31.7	4.4	561	107	14.5
0500000US21055	21055	Crittenden County, Kentucky	3721	134	3721	(X)	2567	122	69	3.3	924	102	24.8	2.6	2030	131	54.6	3.4	714	106	19.2	2.7	170	63	4.6	1.7	86	58	2.3	1.6	367	87	9.9	2.4	124	58	3.3	1.6	1154	144	31	3.3	1014	135	27.3	3.2	520	99	14
0500000US21057	21057	Cumberland County, Kentucky	2771	167	2771	(X)	1885	156	68	3.8	602	113	21.7	3.6	1356	158	48.9	4.8	394	94	14.2	3.2	225	82	8.1	2.9	91	62	3.3	2.2	304	80	11	2.9	117	54	4.2	1.9	886	118	32	3.8	817	110	29.5	3.6	362	81	13.1
0500000US21059	21059	Daviess County, Kentucky	39282	493	39282	(X)	26070	618	66.4	1.5	10994	496	28	1.2	19578	616	49.8	1.5	7282	424	18.5	1.1	1721	257	4.4	0.7	920	204	2.3	0.5	4771	393	12.1	1	2792	344	7.1	0.9	13212	620	33.6	1.5	11073	580	28.2	1.4	4440	381	11.3
0500000US21061	21061	Edmonson County, Kentucky	4712	242	4712	(X)	3474	255	73.7	4.2	1196	164	25.4	3.2	2822	248	59.9	4.6	965	149	20.5	3	192	103	4.1	2.2	55	57	1.2	1.2	460	131	9.8	2.7	176	76	3.7	1.6	1238	212	26.3	4.2	1086	190	23	3.7	490	132	10.4
0500000US21063	21063	Elliott County, Kentucky	2624	173	2624	(X)	1850	188	70.5	5.7	779	127	29.7	3.7	1258	160	47.9	5.9	459	105	17.5	3.6	237	95	9	3.5	115	65	4.4	2.4	355	103	13.5	3.7	205	86	7.8	3.1	774	159	29.5	5.7	633	139	24.1	4.9	377	112	14.4
0500000US21065	21065	Estill County, Kentucky	5622	239	5622	(X)	3959	253	70.4	3.5	1435	191	25.5	3.2	2769	243	49.3	4.2	862	159	15.3	2.9	225	88	4	1.5	92	64	1.6	1.1	965	224	17.2	3.8	481	154	8.6	2.7	1663	211	29.6	3.5	1513	207	26.9	3.4	617	122	11
0500000US21067	21067	Fayette County, Kentucky	126439	989	126439	(X)	72755	963	57.5	0.7	33256	859	26.3	0.7	51173	1078	40.5	0.8	21095	772	16.7	0.6	5471	556	4.3	0.4	2811	411	2.2	0.3	16111	802	12.7	0.6	9350	635	7.4	0.5	53684	1123	42.5	0.7	40361	1053	31.9	0.8	10684	567	8.4
0500000US21069	21069	Fleming County, Kentucky	5730	150	5730	(X)	4075	193	71.1	2.8	1639	161	28.6	2.6	3112	180	54.3	3	1159	122	20.2	2.1	300	102	5.2	1.8	156	92	2.7	1.6	663	139	11.6	2.4	324	110	5.7	1.9	1655	169	28.9	2.8	1459	171	25.5	2.9	639	128	11.2
0500000US21071	21071	Floyd County, Kentucky	15233	369	15233	(X)	10472	441	68.7	2.4	3827	363	25.1	2.2	7457	436	49	2.6	2547	344	16.7	2.2	842	195	5.5	1.3	323	151	2.1	1	2173	267	14.3	1.7	957	200	6.3	1.3	4761	376	31.3	2.4	4312	385	28.3	2.5	1740	235	11.4
0500000US21073	21073	Franklin County, Kentucky	20978	378	20978	(X)	12497	435	59.6	1.9	5039	373	24	1.7	9033	451	43.1	2.1	3114	283	14.8	1.3	885	221	4.2	1	458	189	2.2	0.9	2579	340	12.3	1.6	1467	262	7	1.2	8481	452	40.4	1.9	7310	433	34.8	1.9	2318	242	11
0500000US21075	21075	Fulton County, Kentucky	2611	156	2611	(X)	1590	141	60.9	4.2	643	108	24.6	3.5	1112	125	42.6	4.8	348	87	13.3	3.2	81	44	3.1	1.6	62	37	2.4	1.4	397	89	15.2	3.1	233	71	8.9	2.6	1021	127	39.1	4.2	979	126	37.5	4.2	391	73	15
0500000US21077	21077	Gallatin County, Kentucky	2962	139	2962	(X)	2027	122	68.4	3.7	889	108	30	3.6	1488	129	50.2	4.6	572	88	19.3	3.1	162	75	5.5	2.5	119	65	4	2.2	377	92	12.7	3	198	73	6.7	2.5	935	131	31.6	3.7	832	132	28.1	3.9	205	71	6.9
0500000US21079	21079	Garrard County, Kentucky	6732	176	6732	(X)	4982	226	74	3.1	1909	174	28.4	2.5	3839	260	57	3.8	1265	171	18.8	2.5	256	99	3.8	1.5	150	92	2.2	1.4	887	173	13.2	2.6	494	137	7.3	2	1750	218	26	3.1	1521	203	22.6	2.9	685	124	10.2
0500000US21081	21081	Grant County, Kentucky	8327	315	8327	(X)	6118	324	73.5	3.3	2574	257	30.9	3	4448	351	53.4	3.8	1593	277	19.1	3.3	623	206	7.5	2.5	332	151	4	1.8	1047	211	12.6	2.4	649	177	7.8	2.1	2209	302	26.5	3.3	1766	268	21.2	3	855	175	10.3
0500000US21083	21083	Graves County, Kentucky	14268	393	14268	(X)	9622	348	67.4	2.3	3847	265	27	1.6	7596	379	53.2	2.9	2674	239	18.7	1.7	382	111	2.7	0.8	190	85	1.3	0.6	1644	296	11.5	2	983	241	6.9	1.6	4646	389	32.6	2.3	4261	390	29.9	2.3	1911	232	13.4
0500000US21085	21085	Grayson County, Kentucky	9736	268	9736	(X)	6794	321	69.8	2.7	2693	283	27.7	2.6	5380	299	55.3	2.8	2043	275	21	2.6	503	138	5.2	1.4	192	85	2	0.9	911	204	9.4	2.1	458	157	4.7	1.6	2942	277	30.2	2.7	2644	258	27.2	2.5	1174	189	12.1
0500000US21087	21087	Green County, Kentucky	4528	163	4528	(X)	3116	192	68.8	3.7	1204	127	26.6	2.6	2485	178	54.9	3.8	898	118	19.8	2.5	174	77	3.8	1.7	33	24	0.7	0.5	457	103	10.1	2.2	273	84	6	1.8	1412	181	31.2	3.7	1255	165	27.7	3.5	728	119	16.1
0500000US21089	21089	Greenup County, Kentucky	14289	256	14289	(X)	10306	285	72.1	1.9	3719	238	26	1.5	7840	315	54.9	2	2667	227	18.7	1.5	861	157	6	1.1	419	117	2.9	0.8	1605	194	11.2	1.4	633	136	4.4	0.9	3983	299	27.9	1.9	3385	263	23.7	1.7	1768	187	12.4
0500000US21091	21091	Hancock County, Kentucky	3254	104	3254	(X)	2524	111	77.6	2.5	1051	86	32.3	2.4	1989	118	61.1	3.4	742	98	22.8	3	134	45	4.1	1.4	73	36	2.2	1.1	401	85	12.3	2.5	236	67	7.3	2	730	88	22.4	2.5	647	81	19.9	2.4	216	57	6.6
0500000US21093	21093	Hardin County, Kentucky	40422	682	40422	(X)	27424	697	67.8	1.6	12300	518	30.4	1.2	20482	751	50.7	1.7	8149	511	20.2	1.2	1893	310	4.7	0.8	1103	237	2.7	0.6	5049	453	12.5	1.1	3048	373	7.5	0.9	12998	716	32.2	1.6	10974	693	27.1	1.6	3655	328	9
0500000US21095	21095	Harlan County, Kentucky	11429	268	11429	(X)	7978	325	69.8	2.3	2946	242	25.8	1.9	5492	325	48.1	2.7	2090	217	18.3	1.8	765	154	6.7	1.3	146	65	1.3	0.6	1721	207	15.1	1.8	710	136	6.2	1.2	3451	279	30.2	2.3	3109	265	27.2	2.2	1540	195	13.5
0500000US21097	21097	Harrison County, Kentucky	7135	255	7135	(X)	4882	270	68.4	3.3	1933	226	27.1	3	3649	269	51.1	3.6	1204	188	16.9	2.6	325	112	4.6	1.6	182	89	2.6	1.2	908	157	12.7	2.1	547	131	7.7	1.8	2253	257	31.6	3.3	2021	258	28.3	3.4	914	155	12.8
0500000US21099	21099	Hart County, Kentucky	7387	188	7387	(X)	5216	233	70.6	2.9	2221	165	30.1	2	4083	242	55.3	3.3	1636	168	22.1	2.2	284	91	3.8	1.2	152	73	2.1	1	849	117	11.5	1.5	433	97	5.9	1.3	2171	235	29.4	2.9	1881	216	25.5	2.7	870	119	11.8
0500000US21101	21101	Henderson County, Kentucky	18914	377	18914	(X)	12504	463	66.1	2.3	5113	351	27	1.7	8824	407	46.7	2.2	2986	261	15.8	1.3	1187	227	6.3	1.2	642	161	3.4	0.9	2493	288	13.2	1.5	1485	265	7.9	1.4	6410	473	33.9	2.3	5584	459	29.5	2.3	2128	263	11.3
0500000US21103	21103	Henry County, Kentucky	5996	148	5996	(X)	4266	173	71.1	2.8	1556	140	26	2.3	3162	191	52.7	3.2	1030	133	17.2	2.2	357	97	6	1.6	175	71	2.9	1.2	747	134	12.5	2.2	351	103	5.9	1.7	1730	182	28.9	2.8	1483	163	24.7	2.5	702	101	11.7
0500000US21105	21105	Hickman County, Kentucky	1856	148	1856	(X)	1162	137	62.6	6	335	63	18	3.1	851	133	45.9	7	212	59	11.4	3.1	90	70	4.8	3.7	16	19	0.9	1	221	65	11.9	3.2	107	45	5.8	2.3	694	130	37.4	6	585	119	31.5	5.9	342	94	18.4
0500000US21107	21107	Hopkins County, Kentucky	18394	395	18394	(X)	12584	376	68.4	2	5010	325	27.2	1.6	9463	387	51.4	2.3	3259	289	17.7	1.6	593	161	3.2	0.9	254	118	1.4	0.6	2528	309	13.7	1.6	1497	237	8.1	1.2	5810	428	31.6	2	5069	379	27.6	1.8	2219	231	12.1
0500000US21109	21109	Jackson County, Kentucky	5546	212	5546	(X)	3978	303	71.7	4.7	1525	245	27.5	4.1	2962	280	53.4	4.8	1074	221	19.4	3.9	249	110	4.5	2	107	76	1.9	1.4	767	168	13.8	3	344	116	6.2	2	1568	264	28.3	4.7	1383	254	24.9	4.5	523	136	9.4
0500000US21111	21111	Jefferson County, Kentucky	310355	1600	310355	(X)	185805	1639	59.9	0.5	78819	1324	25.4	0.4	125574	1689	40.5	0.5	46613	1223	15	0.4	15241	826	4.9	0.3	7060	555	2.3	0.2	44990	1099	14.5	0.4	25146	863	8.1	0.3	124550	1902	40.1	0.5	103459	1656	33.3	0.5	34016	818	11
0500000US21113	21113	Jessamine County, Kentucky	18401	296	18401	(X)	13985	410	76	2.2	6191	344	33.6	1.9	10256	423	55.7	2.3	3933	336	21.4	1.8	931	207	5.1	1.1	513	163	2.8	0.9	2798	284	15.2	1.5	1745	242	9.5	1.3	4416	434	24	2.2	3467	373	18.8	2	1214	209	6.6
0500000US21115	21115	Johnson County, Kentucky	8820	271	8820	(X)	6148	325	69.7	3	2256	242	25.6	2.6	4759	306	54	3.1	1689	199	19.1	2.1	477	188	5.4	2.1	224	124	2.5	1.4	912	208	10.3	2.4	343	117	3.9	1.3	2672	276	30.3	3	2362	262	26.8	2.9	935	205	10.6
0500000US21117	21117	Kenton County, Kentucky	62746	650	62746	(X)	40510	769	64.6	1.1	17635	633	28.1	1	28838	803	46	1.2	11134	573	17.7	0.9	3177	381	5.1	0.6	1758	337	2.8	0.5	8495	607	13.5	1	4743	453	7.6	0.7	22236	749	35.4	1.1	17947	676	28.6	1	6051	413	9.6
0500000US21119	21119	Knott County, Kentucky	6064	238	6064	(X)	4200	282	69.3	3.4	1534	192	25.3	2.7	3020	215	49.8	3.2	1000	142	16.5	2.2	276	76	4.6	1.2	76	47	1.3	0.8	904	158	14.9	2.4	458	126	7.6	2	1864	209	30.7	3.4	1614	200	26.6	3.2	561	104	9.3
0500000US21121	21121	Knox County, Kentucky	12333	344	12333	(X)	8297	495	67.3	3.5	3379	382	27.4	2.8	5591	380	45.3	3	1959	280	15.9	2.1	785	216	6.4	1.7	376	163	3	1.3	1921	309	15.6	2.4	1044	248	8.5	2	4036	444	32.7	3.5	3522	401	28.6	3.1	1538	232	12.5
0500000US21123	21123	Larue County, Kentucky	5485	204	5485	(X)	3964	220	72.3	3.5	1545	181	28.2	3.2	2955	259	53.9	4.1	914	173	16.7	3	261	91	4.8	1.6	154	81	2.8	1.5	748	190	13.6	3.6	477	152	8.7	2.9	1521	208	27.7	3.5	1201	189	21.9	3.2	582	135	10.6
0500000US21125	21125	Laurel County, Kentucky	23029	388	23029	(X)	15831	556	68.7	2.1	6470	384	28.1	1.5	11615	508	50.4	2	4333	369	18.8	1.5	1190	236	5.2	1	459	183	2	0.8	3026	336	13.1	1.4	1678	301	7.3	1.3	7198	496	31.3	2.1	6239	474	27.1	2	2449	301	10.6
0500000US21127	21127	Lawrence County, Kentucky	6142	182	6142	(X)	4341	246	70.7	3.5	1615	166	26.3	2.4	3479	217	56.6	3.2	1294	128	21.1	1.9	288	90	4.7	1.4	105	56	1.7	0.9	574	129	9.3	2.1	216	84	3.5	1.3	1801	224	29.3	3.5	1665	214	27.1	3.4	786	143	12.8
0500000US21129	21129	Lee County, Kentucky	2821	149	2821	(X)	1646	175	58.3	5.8	494	116	17.5	3.9	1136	145	40.3	4.9	287	96	10.2	3.3	146	81	5.2	2.8	20	24	0.7	0.9	364	103	12.9	3.7	187	81	6.6	2.9	1175	180	41.7	5.8	1058	181	37.5	5.9	379	71	13.4
0500000US21131	21131	Leslie County, Kentucky	4074	269	4074	(X)	2832	293	69.5	5.3	946	170	23.2	3.6	1983	269	48.7	5.8	716	155	17.6	3.3	270	108	6.6	2.5	86	71	2.1	1.7	579	158	14.2	3.8	144	83	3.5	2.1	1242	225	30.5	5.3	1139	229	28	5.4	536	152	13.2
0500000US21133	21133	Letcher County, Kentucky	10017	281	10017	(X)	7177	373	71.6	3.4	2461	269	24.6	2.5	5168	348	51.6	3.4	1534	232	15.3	2.2	446	159	4.5	1.6	163	87	1.6	0.9	1563	239	15.6	2.3	764	151	7.6	1.5	2840	366	28.4	3.4	2549	342	25.4	3.2	1219	212	12.2
0500000US21135	21135	Lewis County, Kentucky	5431	178	5431	(X)	3872	193	71.3	3.3	1429	141	26.3	2.5	3006	203	55.3	3.5	1053	122	19.4	2.1	296	89	5.5	1.6	150	68	2.8	1.3	570	121	10.5	2.3	226	69	4.2	1.3	1559	198	28.7	3.3	1398	188	25.7	3.1	529	111	9.7
0500000US21137	21137	Lincoln County, Kentucky	9721	271	9721	(X)	6681	365	68.7	3.1	2705	259	27.8	2.5	4651	330	47.8	3.3	1690	230	17.4	2.4	604	170	6.2	1.7	305	130	3.1	1.3	1426	223	14.7	2.2	710	163	7.3	1.6	3040	306	31.3	3.1	2650	270	27.3	2.8	1323	174	13.6
0500000US21139	21139	Livingston County, Kentucky	3880	228	3880	(X)	2799	228	72.1	5.1	706	162	18.2	3.9	2317	226	59.7	5.6	512	126	13.2	3.2	66	47	1.7	1.2	37	35	1	0.9	416	124	10.7	3	157	80	4	2	1081	220	27.9	5.1	942	196	24.3	4.7	473	123	12.2
0500000US21141	21141	Logan County, Kentucky	10682	301	10682	(X)	6894	396	64.5	3.3	2587	266	24.2	2.2	5124	371	48	3.5	1630	213	15.3	1.9	576	158	5.4	1.4	316	126	3	1.1	1194	214	11.2	1.9	641	182	6	1.7	3788	377	35.5	3.3	3342	382	31.3	3.4	1413	200	13.2
0500000US21143	21143	Lyon County, Kentucky	3326	211	3326	(X)	2007	190	60.3	4.9	529	114	15.9	3.1	1673	193	50.3	5.3	362	92	10.9	2.6	85	44	2.6	1.4	45	39	1.4	1.2	249	102	7.5	3	122	59	3.7	1.7	1319	195	39.7	4.9	1119	193	33.6	5	394	95	11.8
0500000US21145	21145	McCracken County, Kentucky	27950	435	27950	(X)	16798	508	60.1	1.7	6857	425	24.5	1.5	12204	452	43.7	1.6	4027	295	14.4	1.1	915	234	3.3	0.8	517	188	1.8	0.7	3679	434	13.2	1.5	2313	381	8.3	1.3	11152	510	39.9	1.7	9816	478	35.1	1.6	3651	314	13.1
0500000US21147	21147	McCreary County, Kentucky	6252	254	6252	(X)	4494	304	71.9	3.7	1639	227	26.2	3.4	3137	279	50.2	3.9	1183	201	18.9	3	569	177	9.1	2.8	153	82	2.4	1.3	788	197	12.6	3	303	130	4.8	2.1	1758	240	28.1	3.7	1658	246	26.5	3.8	487	157	7.8
0500000US21149	21149	McLean County, Kentucky	3751	114	3751	(X)	2746	151	73.2	3.6	1002	109	26.7	2.7	2250	151	60	3.9	698	102	18.6	2.7	198	56	5.3	1.5	135	53	3.6	1.4	298	74	7.9	1.9	169	58	4.5	1.5	1005	144	26.8	3.6	906	141	24.2	3.6	445	96	11.9
0500000US21151	21151	Madison County, Kentucky	32409	485	32409	(X)	20152	527	62.2	1.6	8557	425	26.4	1.3	14965	497	46.2	1.5	5958	373	18.4	1.2	1490	268	4.6	0.8	723	193	2.2	0.6	3697	333	11.4	1	1876	226	5.8	0.7	12257	600	37.8	1.6	9245	519	28.5	1.5	2900	380	8.9
0500000US21153	21153	Magoffin County, Kentucky	5027	155	5027	(X)	3517	222	70	3.9	1375	190	27.4	3.6	2774	212	55.2	4.1	940	180	18.7	3.5	173	79	3.4	1.6	97	67	1.9	1.3	570	129	11.3	2.5	338	110	6.7	2.2	1510	205	30	3.9	1431	210	28.5	4.1	477	97	9.5
0500000US21155	21155	Marion County, Kentucky	7438	176	7438	(X)	4854	248	65.3	3.1	2107	190	28.3	2.4	3551	227	47.7	3	1312	181	17.6	2.4	352	93	4.7	1.3	153	60	2.1	0.8	951	182	12.8	2.4	642	162	8.6	2.1	2584	248	34.7	3.1	2235	235	30	3.1	855	137	11.5
0500000US21157	21157	Marshall County, Kentucky	12856	383	12856	(X)	9136	442	71.1	2.7	3131	289	24.4	1.9	7419	352	57.7	2.7	2333	212	18.1	1.5	541	173	4.2	1.3	318	134	2.5	1	1176	262	9.1	1.9	480	158	3.7	1.2	3720	363	28.9	2.7	3241	341	25.2	2.5	1423	245	11.1
0500000US21159	21159	Martin County, Kentucky	4295	259	4295	(X)	2943	267	68.5	4.9	1187	190	27.6	4.1	2323	261	54.1	5.3	996	178	23.2	3.8	130	73	3	1.7	55	50	1.3	1.2	490	140	11.4	3.2	136	76	3.2	1.8	1352	232	31.5	4.9	1195	219	27.8	4.7	484	131	11.3
0500000US21161	21161	Mason County, Kentucky	6804	247	6804	(X)	4535	234	66.7	2.8	1742	182	25.6	2.4	3328	235	48.9	3.1	1124	172	16.5	2.4	278	98	4.1	1.4	130	62	1.9	0.9	929	157	13.7	2.4	488	123	7.2	1.8	2269	221	33.3	2.8	2003	223	29.4	3	743	113	10.9
0500000US21163	21163	Meade County, Kentucky	10631	250	10631	(X)	7816	289	73.5	2.9	3418	256	32.2	2.3	6212	352	58.4	3.7	2515	252	23.7	2.4	608	185	5.7	1.7	295	132	2.8	1.2	996	177	9.4	1.6	608	148	5.7	1.4	2815	340	26.5	2.9	2292	282	21.6	2.4	1018	179	9.6
0500000US21165	21165	Menifee County, Kentucky	2521	119	2521	(X)	1734	108	68.8	4.4	641	103	25.4	4	1291	132	51.2	5.2	388	83	15.4	3.2	91	36	3.6	1.4	50	31	2	1.2	352	88	14	3.6	203	71	8.1	2.8	787	132	31.2	4.4	706	127	28	4.3	271	80	10.7
0500000US21167	21167	Mercer County, Kentucky	8813	233	8813	(X)	6140	289	69.7	2.9	2052	198	23.3	2.1	4691	276	53.2	2.8	1437	173	16.3	1.8	422	131	4.8	1.5	209	112	2.4	1.3	1027	192	11.7	2.2	406	118	4.6	1.3	2673	278	30.3	2.9	2224	238	25.2	2.5	883	151	10
0500000US21169	21169	Metcalfe County, Kentucky	3922	167	3922	(X)	2750	168	70.1	3.6	1126	155	28.7	3.6	2188	186	55.8	4.4	772	123	19.7	2.9	138	69	3.5	1.8	43	41	1.1	1.1	424	131	10.8	3.3	311	118	7.9	3	1172	158	29.9	3.6	963	146	24.6	3.4	470	98	12
0500000US21171	21171	Monroe County, Kentucky	4421	185	4421	(X)	2972	171	67.2	2.8	1195	126	27	2.6	2375	175	53.7	3.4	872	132	19.7	2.8	154	72	3.5	1.6	108	71	2.4	1.6	443	97	10	2.1	215	80	4.9	1.8	1449	144	32.8	2.8	1261	144	28.5	2.9	654	95	14.8
0500000US21173	21173	Montgomery County, Kentucky	10212	272	10212	(X)	7138	316	69.9	2.6	3183	267	31.2	2.5	5038	307	49.3	2.6	1945	256	19	2.4	476	155	4.7	1.5	317	145	3.1	1.4	1624	191	15.9	1.9	921	196	9	1.9	3074	279	30.1	2.6	2428	259	23.8	2.5	1034	180	10.1
0500000US21175	21175	Morgan County, Kentucky	4946	168	4946	(X)	3620	193	73.2	3.3	1362	132	27.5	2.4	2726	180	55.1	3.3	854	109	17.3	2.1	250	64	5.1	1.3	141	59	2.9	1.2	644	106	13	2.1	367	89	7.4	1.8	1326	171	26.8	3.3	1093	138	22.1	2.7	508	87	10.3
0500000US21177	21177	Muhlenberg County, Kentucky	11510	335	11510	(X)	8067	338	70.1	2.5	2722	252	23.6	2	6275	335	54.5	2.8	1823	222	15.8	1.8	442	141	3.8	1.2	162	85	1.4	0.7	1350	269	11.7	2.3	737	216	6.4	1.8	3443	315	29.9	2.5	3063	332	26.6	2.7	1294	170	11.2
0500000US21179	21179	Nelson County, Kentucky	17236	267	17236	(X)	12394	429	71.9	2.2	5556	321	32.2	1.8	9365	389	54.3	2.2	3801	302	22.1	1.8	822	250	4.8	1.4	477	169	2.8	1	2207	317	12.8	1.8	1278	276	7.4	1.6	4842	397	28.1	2.2	4064	381	23.6	2.2	1557	164	9
0500000US21181	21181	Nicholas County, Kentucky	2758	130	2758	(X)	1859	149	67.4	4.8	674	113	24.4	3.7	1461	145	53	5	437	76	15.8	2.7	101	53	3.7	1.9	70	45	2.5	1.6	297	97	10.8	3.4	167	80	6.1	2.8	899	145	32.6	4.8	739	137	26.8	4.6	308	86	11.2
0500000US21183	21183	Ohio County, Kentucky	8930	266	8930	(X)	6350	343	71.1	3.3	2421	260	27.1	2.7	5065	343	56.7	3.5	1677	224	18.8	2.3	418	119	4.7	1.3	244	103	2.7	1.1	867	170	9.7	1.9	500	123	5.6	1.4	2580	313	28.9	3.3	2192	285	24.5	3.1	1070	185	12
0500000US21185	21185	Oldham County, Kentucky	20148	271	20148	(X)	16313	329	81	1.6	8222	322	40.8	1.5	13630	310	67.6	1.5	6734	276	33.4	1.3	793	152	3.9	0.7	468	125	2.3	0.6	1890	213	9.4	1.1	1020	181	5.1	0.9	3835	334	19	1.6	3355	321	16.7	1.5	1244	184	6.2
0500000US21187	21187	Owen County, Kentucky	3946	244	3946	(X)	2740	221	69.4	4.3	1137	135	28.8	3.4	2095	237	53.1	5	777	131	19.7	3.1	257	90	6.5	2.3	121	56	3.1	1.4	388	97	9.8	2.5	239	84	6.1	2.2	1206	197	30.6	4.3	1077	183	27.3	4.1	455	132	11.5
0500000US21189	21189	Owsley County, Kentucky	1681	133	1681	(X)	1192	112	70.9	5.2	428	97	25.5	5.7	710	106	42.2	6.4	238	73	14.2	4.4	141	62	8.4	3.5	46	33	2.7	1.9	341	92	20.3	5.2	144	72	8.6	4.3	489	103	29.1	5.2	469	100	27.9	5.1	200	74	11.9
0500000US21191	21191	Pendleton County, Kentucky	5296	177	5296	(X)	3865	207	73	3.4	1425	186	26.9	3.3	3074	213	58	3.8	1074	166	20.3	3.1	318	108	6	2	119	62	2.2	1.2	473	133	8.9	2.5	232	91	4.4	1.7	1431	193	27	3.4	1201	187	22.7	3.4	434	111	8.2
0500000US21193	21193	Perry County, Kentucky	11073	364	11073	(X)	7551	395	68.2	3.2	3233	268	29.2	2.2	5307	346	47.9	3.1	2093	254	18.9	2.3	600	149	5.4	1.3	254	94	2.3	0.8	1644	247	14.8	2.1	886	203	8	1.8	3522	391	31.8	3.2	3071	366	27.7	3.1	1366	215	12.3
0500000US21195	21195	Pike County, Kentucky	25861	460	25861	(X)	17809	543	68.9	1.6	6972	346	27	1.2	13154	510	50.9	1.6	4793	340	18.5	1.2	1273	217	4.9	0.8	542	144	2.1	0.6	3382	311	13.1	1.2	1637	273	6.3	1	8052	420	31.1	1.6	7106	414	27.5	1.6	2880	259	11.1
0500000US21197	21197	Powell County, Kentucky	4794	223	4794	(X)	3171	235	66.1	4.2	1217	175	25.4	3.2	2087	251	43.5	4.9	799	155	16.7	3	289	122	6	2.5	67	50	1.4	1	795	158	16.6	3.3	351	119	7.3	2.4	1623	226	33.9	4.2	1402	232	29.2	4.6	508	127	10.6
0500000US21199	21199	Pulaski County, Kentucky	25567	555	25567	(X)	16950	607	66.3	2	6591	438	25.8	1.5	12144	534	47.5	2.1	4059	368	15.9	1.4	1115	238	4.4	0.9	481	160	1.9	0.6	3691	362	14.4	1.3	2051	299	8	1.1	8617	576	33.7	2	7231	533	28.3	1.9	2911	282	11.4
0500000US21201	21201	Robertson County, Kentucky	961	80	961	(X)	582	60	60.6	6.7	215	44	22.4	5.3	479	55	49.8	5.8	141	37	14.7	4.3	21	20	2.2	2.1	17	19	1.8	2	82	39	8.5	4.1	57	32	5.9	3.3	379	84	39.4	6.7	346	77	36	6.3	200	68	20.8
0500000US21203	21203	Rockcastle County, Kentucky	6488	204	6488	(X)	4732	228	72.9	2.9	1950	191	30.1	2.8	3598	229	55.5	3.3	1313	179	20.2	2.7	252	80	3.9	1.2	147	63	2.3	0.9	882	144	13.6	2.2	490	116	7.6	1.8	1756	203	27.1	2.9	1554	203	24	2.9	609	132	9.4
0500000US21205	21205	Rowan County, Kentucky	8473	374	8473	(X)	5084	384	60	4.1	2199	325	26	3.6	3591	322	42.4	3.4	1420	252	16.8	2.9	471	187	5.6	2.2	287	151	3.4	1.8	1022	245	12.1	2.9	492	176	5.8	2	3389	396	40	4.1	2678	347	31.6	3.8	935	194	11
0500000US21207	21207	Russell County, Kentucky	7081	223	7081	(X)	4586	237	64.8	3.1	1741	207	24.6	2.7	3349	226	47.3	3.2	1087	163	15.4	2.3	405	127	5.7	1.7	263	109	3.7	1.5	832	163	11.7	2.3	391	110	5.5	1.5	2495	245	35.2	3.1	2271	250	32.1	3.2	1042	167	14.7
0500000US21209	21209	Scott County, Kentucky	18913	287	18913	(X)	14073	359	74.4	1.8	6763	350	35.8	1.8	11152	447	59	2.4	4943	346	26.1	1.8	752	162	4	0.8	391	115	2.1	0.6	2169	312	11.5	1.6	1429	235	7.6	1.2	4840	358	25.6	1.8	3866	303	20.4	1.5	1374	176	7.3
0500000US21211	21211	Shelby County, Kentucky	16123	276	16123	(X)	11900	322	73.8	2.1	5285	351	32.8	2.1	9189	357	57	2.3	3724	330	23.1	2	716	169	4.4	1	414	131	2.6	0.8	1995	272	12.4	1.7	1147	223	7.1	1.4	4223	371	26.2	2.1	3578	344	22.2	1.9	1568	217	9.7
0500000US21213	21213	Simpson County, Kentucky	6958	181	6958	(X)	4628	271	66.5	3.7	1760	211	25.3	2.9	3450	240	49.6	3.5	1216	168	17.5	2.4	398	162	5.7	2.3	272	156	3.9	2.3	780	177	11.2	2.5	272	127	3.9	1.8	2330	269	33.5	3.7	1953	260	28.1	3.6	691	134	9.9
0500000US21215	21215	Spencer County, Kentucky	6448	175	6448	(X)	5274	231	81.8	2.5	2208	203	34.2	2.9	4329	237	67.1	3.1	1602	179	24.8	2.6	344	115	5.3	1.7	206	88	3.2	1.3	601	145	9.3	2.2	400	136	6.2	2.1	1174	163	18.2	2.5	855	173	13.3	2.7	270	88	4.2
0500000US21217	21217	Taylor County, Kentucky	9745	268	9745	(X)	6297	318	64.6	3.1	2698	266	27.7	2.7	4340	322	44.5	3.3	1458	217	15	2.2	461	140	4.7	1.4	257	113	2.6	1.2	1496	249	15.4	2.5	983	220	10.1	2.2	3448	337	35.4	3.1	3066	311	31.5	3	1428	215	14.7
0500000US21219	21219	Todd County, Kentucky	4534	167	4534	(X)	3263	191	72	3.8	1440	114	31.8	2.4	2484	179	54.8	3.8	1045	112	23	2.5	265	112	5.8	2.5	124	72	2.7	1.6	514	111	11.3	2.4	271	78	6	1.7	1271	186	28	3.8	1150	180	25.4	3.7	499	116	11
0500000US21221	21221	Trigg County, Kentucky	5977	204	5977	(X)	4207	273	70.4	3.8	1515	186	25.3	2.8	3193	276	53.4	4.3	929	157	15.5	2.6	301	105	5	1.8	123	74	2.1	1.2	713	186	11.9	3	463	149	7.7	2.4	1770	234	29.6	3.8	1437	220	24	3.6	789	151	13.2
0500000US21223	21223	Trimble County, Kentucky	3555	119	3555	(X)	2300	164	64.7	4.7	890	148	25	4.1	1895	209	53.3	6.1	568	136	16	3.9	118	82	3.3	2.3	105	74	3	2.1	287	115	8.1	3.2	217	104	6.1	2.9	1255	182	35.3	4.7	1083	174	30.5	4.6	411	112	11.6
0500000US21225	21225	Union County, Kentucky	5565	192	5565	(X)	3709	215	66.6	3.4	1478	176	26.6	2.9	2980	196	53.5	3.7	1046	124	18.8	2.2	214	160	3.8	2.8	159	156	2.9	2.8	515	134	9.3	2.4	273	95	4.9	1.7	1856	205	33.4	3.4	1665	201	29.9	3.4	640	115	11.5
0500000US21227	21227	Warren County, Kentucky	45974	541	45974	(X)	29709	813	64.6	1.6	13332	554	29	1.2	21786	701	47.4	1.5	8788	502	19.1	1.1	2309	363	5	0.8	1235	257	2.7	0.6	5614	538	12.2	1.1	3309	423	7.2	0.9	16265	771	35.4	1.6	12449	708	27.1	1.5	3897	373	8.5
0500000US21229	21229	Washington County, Kentucky	4490	131	4490	(X)	3055	160	68	3.6	1266	133	28.2	3	2271	174	50.6	3.9	893	133	19.9	3	186	88	4.1	2	125	80	2.8	1.8	598	121	13.3	2.7	248	93	5.5	2.1	1435	179	32	3.6	1206	150	26.9	3.1	635	125	14.1
0500000US21231	21231	Wayne County, Kentucky	7842	352	7842	(X)	5073	349	64.7	3.8	1918	250	24.5	3.1	3854	301	49.1	3.7	1338	184	17.1	2.4	456	152	5.8	1.9	180	88	2.3	1.1	763	211	9.7	2.6	400	174	5.1	2.2	2769	334	35.3	3.8	2565	324	32.7	3.6	1101	189	14
0500000US21233	21233	Webster County, Kentucky	5136	173	5136	(X)	3600	210	70.1	3.4	1427	158	27.8	2.6	2825	192	55	3.6	1014	123	19.7	2.2	318	90	6.2	1.7	163	65	3.2	1.2	457	112	8.9	2.1	250	100	4.9	1.9	1536	187	29.9	3.4	1373	172	26.7	3.2	592	96	11.5
0500000US21235	21235	Whitley County, Kentucky	12708	466	12708	(X)	9435	495	74.2	2.9	3604	367	28.4	2.4	6794	456	53.5	3.4	2586	363	20.3	2.7	854	254	6.7	1.9	180	102	1.4	0.8	1787	310	14.1	2.3	838	239	6.6	1.8	3273	398	25.8	2.9	2745	332	21.6	2.5	1239	206	9.7
0500000US21237	21237	Wolfe County, Kentucky	2899	168	2899	(X)	1912	186	66	5.2	720	144	24.8	4.8	1336	174	46.1	5.5	355	117	12.2	4.1	136	63	4.7	2.1	95	53	3.3	1.8	440	133	15.2	4.5	270	116	9.3	3.9	987	162	34	5.2	844	163	29.1	5.5	274	105	9.5
0500000US21239	21239	Woodford County, Kentucky	9976	197	9976	(X)	7020	232	70.4	2.4	3000	176	30.1	1.7	5500	289	55.1	3	2085	204	20.9	2	381	109	3.8	1.1	203	92	2	0.9	1139	191	11.4	1.9	712	158	7.1	1.6	2956	266	29.6	2.4	2417	281	24.2	2.7	859	158	8.6
0500000US39001	39001	Adams County, Ohio	10885	343	10885	(X)	7453	336	68.5	2.2	3121	254	28.7	1.9	5484	344	50.4	2.8	1982	240	18.2	2	570	160	5.2	1.4	272	118	2.5	1.1	1399	209	12.9	1.9	867	185	8	1.7	3432	267	31.5	2.2	2984	271	27.4	2.3	1287	166	11.8
0500000US39003	39003	Allen County, Ohio	40039	527	40039	(X)	26008	555	65	1.2	11058	410	27.6	0.9	18508	502	46.2	1.2	6666	374	16.6	0.9	1841	309	4.6	0.8	1112	245	2.8	0.6	5659	376	14.1	0.9	3280	328	8.2	0.8	14031	557	35	1.2	11674	493	29.2	1.1	4437	342	11.1
0500000US39005	39005	Ashland County, Ohio	20391	292	20391	(X)	13861	484	68	2.4	5760	360	28.2	1.7	10832	460	53.1	2.4	4066	296	19.9	1.5	896	176	4.4	0.9	503	130	2.5	0.6	2133	259	10.5	1.2	1191	231	5.8	1.1	6530	516	32	2.4	5413	453	26.5	2.1	2356	270	11.6
0500000US39007	39007	Ashtabula County, Ohio	38800	580	38800	(X)	24966	562	64.3	1.4	10086	473	26	1.1	18236	521	47	1.3	6211	386	16	0.9	1886	271	4.9	0.7	1138	219	2.9	0.6	4844	422	12.5	1.1	2737	336	7.1	0.9	13834	640	35.7	1.4	11542	600	29.7	1.4	4871	373	12.6
0500000US39009	39009	Athens County, Ohio	22328	407	22328	(X)	12121	427	54.3	1.9	4643	315	20.8	1.4	8765	399	39.3	1.7	2871	254	12.9	1.1	1188	210	5.3	0.9	628	156	2.8	0.7	2168	291	9.7	1.3	1144	247	5.1	1.1	10207	510	45.7	1.9	7446	448	33.3	1.9	1937	171	8.7
0500000US39011	39011	Auglaize County, Ohio	18231	265	18231	(X)	12462	335	68.4	1.7	5010	273	27.5	1.4	10193	318	55.9	1.8	3754	232	20.6	1.3	676	157	3.7	0.8	322	104	1.8	0.6	1593	220	8.7	1.2	934	187	5.1	1	5769	324	31.6	1.7	4812	287	26.4	1.5	2323	235	12.7
0500000US39013	39013	Belmont County, Ohio	27732	420	27732	(X)	17858	538	64.4	1.6	6553	349	23.6	1.1	13468	451	48.6	1.6	4359	290	15.7	1	1383	250	5	0.9	667	152	2.4	0.5	3007	262	10.8	0.9	1527	220	5.5	0.8	9874	451	35.6	1.6	8702	433	31.4	1.6	3979	275	14.3
0500000US39015	39015	Brown County, Ohio	17047	335	17047	(X)	12029	426	70.6	2.1	4393	326	25.8	1.7	8936	366	52.4	2.1	2743	235	16.1	1.4	961	207	5.6	1.2	520	155	3.1	0.9	2132	319	12.5	1.8	1130	228	6.6	1.3	5018	371	29.4	2.1	4165	320	24.4	1.9	1795	217	10.5
0500000US39017	39017	Butler County, Ohio	135100	1005	135100	(X)	93212	1105	69	0.7	41010	939	30.4	0.6	70587	1198	52.2	0.8	28179	882	20.9	0.6	6436	591	4.8	0.4	3196	494	2.4	0.4	16189	691	12	0.5	9635	575	7.1	0.4	41888	1025	31	0.7	33424	1001	24.7	0.7	12326	557	9.1
0500000US39019	39019	Carroll County, Ohio	10871	324	10871	(X)	7813	371	71.9	2.7	2689	235	24.7	1.8	6321	344	58.1	2.7	2047	227	18.8	1.8	544	126	5	1.1	213	77	2	0.7	948	194	8.7	1.8	429	144	3.9	1.3	3058	312	28.1	2.7	2531	285	23.3	2.5	1311	200	12.1
0500000US39021	39021	Champaign County, Ohio	15162	274	15162	(X)	10684	321	70.5	2.1	4105	256	27.1	1.5	8253	273	54.4	1.8	2676	234	17.6	1.4	645	147	4.3	1	408	121	2.7	0.8	1786	208	11.8	1.3	1021	178	6.7	1.2	4478	351	29.5	2.1	3636	322	24	2	1744	189	11.5
0500000US39023	39023	Clark County, Ohio	54681	589	54681	(X)	35609	593	65.1	1	14241	482	26	0.8	24859	592	45.5	1.1	8072	423	14.8	0.8	2829	339	5.2	0.6	1480	275	2.7	0.5	7921	431	14.5	0.7	4689	328	8.6	0.6	19072	633	34.9	1	15694	662	28.7	1.1	6919	459	12.7
0500000US39025	39025	Clermont County, Ohio	75236	704	75236	(X)	53431	787	71	0.9	22487	678	29.9	0.9	42204	908	56.1	1.2	16699	586	22.2	0.8	3311	404	4.4	0.5	1703	321	2.3	0.4	7916	619	10.5	0.8	4085	402	5.4	0.5	21805	721	29	0.9	17934	752	23.8	0.9	6922	421	9.2
0500000US39027	39027	Clinton County, Ohio	16077	378	16077	(X)	10919	329	67.9	1.8	4604	253	28.6	1.4	8298	307	51.6	1.9	2917	246	18.1	1.5	806	164	5	1	545	139	3.4	0.8	1815	234	11.3	1.4	1142	184	7.1	1.1	5158	346	32.1	1.8	4355	379	27.1	2	1895	248	11.8
0500000US39029	39029	Columbiana County, Ohio	41782	585	41782	(X)	28780	587	68.9	1.4	10933	423	26.2	0.9	21505	613	51.5	1.5	7173	506	17.2	1.2	1987	306	4.8	0.7	1013	214	2.4	0.5	5288	537	12.7	1.3	2747	367	6.6	0.9	13002	657	31.1	1.4	11073	576	26.5	1.2	5088	348	12.2
0500000US39031	39031	Coshocton County, Ohio	14397	282	14397	(X)	9840	334	68.3	2	3692	239	25.6	1.6	7892	329	54.8	2.1	2692	186	18.7	1.2	619	117	4.3	0.8	260	73	1.8	0.5	1329	208	9.2	1.4	740	171	5.1	1.2	4557	311	31.7	2	3950	309	27.4	2	1812	208	12.6
0500000US39033	39033	Crawford County, Ohio	17657	332	17657	(X)	11417	334	64.7	1.8	4215	246	23.9	1.2	8719	367	49.4	2.3	2612	207	14.8	1.2	814	194	4.6	1.1	455	153	2.6	0.9	1884	235	10.7	1.3	1148	211	6.5	1.2	6240	364	35.3	1.8	5411	380	30.6	1.9	2534	208	14.4
0500000US39035	39035	Cuyahoga County, Ohio	534559	2127	534559	(X)	304828	2203	57	0.4	128616	1685	24.1	0.3	196186	1928	36.7	0.3	71437	1347	13.4	0.2	23849	943	4.5	0.2	10637	666	2	0.1	84793	1388	15.9	0.3	46542	1155	8.7	0.2	229731	2376	43	0.4	199154	2285	37.3	0.4	71205	1353	13.3
0500000US39037	39037	Darke County, Ohio	20831	340	20831	(X)	14265	431	68.5	1.8	5762	276	27.7	1.2	11427	472	54.9	2	4036	296	19.4	1.3	903	155	4.3	0.8	538	119	2.6	0.6	1935	212	9.3	1	1188	173	5.7	0.8	6566	384	31.5	1.8	5645	342	27.1	1.6	2716	241	13
0500000US39039	39039	Defiance County, Ohio	15378	278	15378	(X)	10675	305	69.4	1.8	4100	227	26.7	1.4	8075	329	52.5	2.4	2700	207	17.6	1.4	809	177	5.3	1.1	437	139	2.8	0.9	1791	238	11.6	1.5	963	187	6.3	1.2	4703	307	30.6	1.8	3759	298	24.4	1.8	1511	162	9.8
0500000US39041	39041	Delaware County, Ohio	66544	442	66544	(X)	50644	674	76.1	0.9	26286	613	39.5	0.9	43742	644	65.7	1	21878	510	32.9	0.7	2041	256	3.1	0.4	1317	228	2	0.3	4861	521	7.3	0.8	3091	417	4.6	0.6	15900	645	23.9	0.9	13369	580	20.1	0.9	4985	343	7.5
0500000US39043	39043	Erie County, Ohio	31731	529	31731	(X)	20116	455	63.4	1.6	7213	406	22.7	1.2	14821	469	46.7	1.8	4285	303	13.5	1	1028	230	3.2	0.7	536	202	1.7	0.6	4267	342	13.4	1	2392	306	7.5	0.9	11615	628	36.6	1.6	9669	546	30.5	1.5	4327	328	13.6
0500000US39045	39045	Fairfield County, Ohio	55138	572	55138	(X)	40102	743	72.7	1.2	18224	703	33.1	1.1	31382	681	56.9	1.2	12795	514	23.2	0.9	2669	369	4.8	0.7	1619	276	2.9	0.5	6051	471	11	0.8	3810	459	6.9	0.8	15036	693	27.3	1.2	12655	689	23	1.2	5402	364	9.8
0500000US39047	39047	Fayette County, Ohio	11666	216	11666	(X)	7834	322	67.2	2.7	3345	242	28.7	2	5616	342	48.1	2.9	1936	234	16.6	2	598	128	5.1	1.1	377	110	3.2	0.9	1620	197	13.9	1.7	1032	160	8.8	1.4	3832	327	32.8	2.7	3201	285	27.4	2.3	1300	144	11.1
0500000US39049	39049	Franklin County, Ohio	489010	1881	489010	(X)	286706	2415	58.6	0.5	136658	1869	27.9	0.4	193946	2413	39.7	0.5	83410	1462	17.1	0.3	23467	894	4.8	0.2	11917	834	2.4	0.2	69293	1469	14.2	0.3	41331	1332	8.5	0.3	202304	2478	41.4	0.5	156826	2568	32.1	0.5	40902	1181	8.4
0500000US39051	39051	Fulton County, Ohio	16240	223	16240	(X)	11683	298	71.9	1.8	4801	277	29.6	1.6	9360	324	57.6	2.2	3354	247	20.7	1.5	827	149	5.1	0.9	518	125	3.2	0.8	1496	226	9.2	1.4	929	199	5.7	1.2	4557	316	28.1	1.8	3910	275	24.1	1.6	1510	173	9.3
0500000US39053	39053	Gallia County, Ohio	11495	342	11495	(X)	8009	321	69.7	2.2	3025	298	26.3	2.2	6142	301	53.4	2.8	2059	202	17.9	1.6	555	159	4.8	1.3	253	123	2.2	1.1	1312	220	11.4	1.8	713	195	6.2	1.6	3486	290	30.3	2.2	3053	280	26.6	2.1	1455	202	12.7
0500000US39055	39055	Geauga County, Ohio	34890	358	34890	(X)	26346	496	75.5	1.2	10000	348	28.7	1	22387	523	64.2	1.3	8248	355	23.6	1	1088	179	3.1	0.5	324	102	0.9	0.3	2871	286	8.2	0.8	1428	221	4.1	0.6	8544	438	24.5	1.2	7020	412	20.1	1.2	3098	264	8.9
0500000US39057	39057	Greene County, Ohio	64279	569	64279	(X)	42153	626	65.6	1	17288	471	26.9	0.8	33211	612	51.7	1	12391	487	19.3	0.8	2326	308	3.6	0.5	1152	205	1.8	0.3	6616	418	10.3	0.6	3745	342	5.8	0.5	22126	703	34.4	1	18325	677	28.5	1	6775	451	10.5
0500000US39059	39059	Guernsey County, Ohio	15863	351	15863	(X)	10363	380	65.3	1.9	4020	233	25.3	1.4	7696	392	48.5	2.3	2605	206	16.4	1.3	784	168	4.9	1	333	110	2.1	0.7	1883	199	11.9	1.2	1082	160	6.8	1	5500	334	34.7	1.9	4511	310	28.4	1.9	2009	198	12.7
0500000US39061	39061	Hamilton County, Ohio	335334	1474	335334	(X)	194795	1865	58.1	0.5	86723	1353	25.9	0.4	130479	1598	38.9	0.5	50172	1182	15	0.3	13730	846	4.1	0.3	6771	478	2	0.1	50586	1321	15.1	0.4	29780	1106	8.9	0.3	140539	1864	41.9	0.5	116537	1777	34.8	0.5	37280	926	11.1
0500000US39063	39063	Hancock County, Ohio	31549	380	31549	(X)	19929	530	63.2	1.6	8261	419	26.2	1.3	15690	581	49.7	1.8	5563	445	17.6	1.4	1289	271	4.1	0.8	847	238	2.7	0.7	2950	345	9.4	1.1	1851	286	5.9	0.9	11620	530	36.8	1.6	9294	505	29.5	1.5	3573	277	11.3
0500000US39065	39065	Hardin County, Ohio	11588	297	11588	(X)	7716	292	66.6	2.3	3222	221	27.8	1.7	6168	290	53.2	2.4	2417	231	20.9	1.9	460	139	4	1.2	209	96	1.8	0.8	1088	174	9.4	1.5	596	126	5.1	1.1	3872	302	33.4	2.3	3201	298	27.6	2.4	1444	175	12.5
0500000US39067	39067	Harrison County, Ohio	6242	189	6242	(X)	4340	187	69.5	2.8	1626	150	26	2.2	3466	195	55.5	3	1161	162	18.6	2.5	235	58	3.8	0.9	104	42	1.7	0.7	639	109	10.2	1.7	361	110	5.8	1.7	1902	194	30.5	2.8	1606	185	25.7	2.7	774	120	12.4
0500000US39069	39069	Henry County, Ohio	11035	193	11035	(X)	7870	272	71.3	2.4	3111	192	28.2	1.8	6225	247	56.4	2.3	2052	166	18.6	1.6	536	122	4.9	1.1	344	109	3.1	1	1109	164	10	1.5	715	134	6.5	1.2	3165	281	28.7	2.4	2708	256	24.5	2.2	1273	161	11.5
0500000US39071	39071	Highland County, Ohio	16635	326	16635	(X)	11131	351	66.9	2	4435	275	26.7	1.6	8153	331	49	1.9	2805	197	16.9	1.2	975	190	5.9	1.1	510	158	3.1	0.9	2003	253	12	1.5	1120	191	6.7	1.1	5504	381	33.1	2	4504	338	27.1	1.9	1920	222	11.5
0500000US39073	39073	Hocking County, Ohio	11326	262	11326	(X)	7970	287	70.4	2.2	3086	239	27.2	1.9	6143	261	54.2	2.4	1958	189	17.3	1.6	537	131	4.7	1.1	272	101	2.4	0.9	1290	183	11.4	1.6	856	149	7.6	1.3	3356	277	29.6	2.2	2855	265	25.2	2.2	1307	170	11.5
0500000US39075	39075	Holmes County, Ohio	12500	226	12500	(X)	10128	307	81	2	4969	245	39.8	1.8	8833	266	70.7	1.7	4439	216	35.5	1.6	420	116	3.4	0.9	150	68	1.2	0.5	875	151	7	1.2	380	103	3	0.8	2372	258	19	2	2048	256	16.4	2	948	162	7.6
0500000US39077	39077	Huron County, Ohio	22521	347	22521	(X)	15534	359	69	1.4	6462	310	28.7	1.3	11666	393	51.8	1.6	4371	277	19.4	1.1	1027	218	4.6	1	468	125	2.1	0.6	2841	246	12.6	1.1	1623	187	7.2	0.8	6987	356	31	1.4	5769	319	25.6	1.3	2566	249	11.4
0500000US39079	39079	Jackson County, Ohio	12814	350	12814	(X)	8558	428	66.8	2.9	3408	325	26.6	2.3	6077	394	47.4	3.1	2020	244	15.8	1.9	843	213	6.6	1.6	457	176	3.6	1.3	1638	311	12.8	2.4	931	241	7.3	1.9	4256	401	33.2	2.9	3743	385	29.2	2.9	1485	244	11.6
0500000US39081	39081	Jefferson County, Ohio	27776	420	27776	(X)	17844	501	64.2	1.7	6406	303	23.1	1	12798	385	46.1	1.3	3937	275	14.2	1	1537	220	5.5	0.8	589	139	2.1	0.5	3509	265	12.6	0.9	1880	201	6.8	0.7	9932	516	35.8	1.7	8453	438	30.4	1.4	4064	328	14.6
0500000US39083	39083	Knox County, Ohio	23029	323	23029	(X)	15223	456	66.1	1.9	6306	350	27.4	1.5	12022	450	52.2	2	4419	387	19.2	1.6	985	205	4.3	0.9	566	157	2.5	0.7	2216	297	9.6	1.3	1321	233	5.7	1	7806	467	33.9	1.9	6244	460	27.1	1.9	2796	344	12.1
0500000US39085	39085	Lake County, Ohio	95249	583	95249	(X)	62208	807	65.3	0.9	24284	565	25.5	0.6	47605	868	50	0.9	16807	557	17.6	0.6	4425	422	4.6	0.4	2183	268	2.3	0.3	10178	506	10.7	0.5	5294	448	5.6	0.5	33041	884	34.7	0.9	27838	782	29.2	0.8	11647	504	12.2
0500000US39087	39087	Lawrence County, Ohio	23243	405	23243	(X)	15497	517	66.7	1.9	5491	407	23.6	1.6	11495	516	49.5	2.1	3669	293	15.8	1.2	1066	236	4.6	1	514	184	2.2	0.8	2936	345	12.6	1.4	1308	274	5.6	1.2	7746	448	33.3	1.9	6650	441	28.6	1.9	3048	293	13.1
0500000US39089	39089	Licking County, Ohio	64034	597	64034	(X)	44806	678	70	1	18699	702	29.2	1.1	34692	737	54.2	1.1	12784	516	20	0.8	2405	328	3.8	0.5	1427	226	2.2	0.4	7709	532	12	0.8	4488	480	7	0.7	19228	719	30	1	15857	613	24.8	0.9	6580	382	10.3
0500000US39091	39091	Logan County, Ohio	18720	375	18720	(X)	12908	425	69	1.8	4924	311	26.3	1.6	9721	386	51.9	2.1	3220	261	17.2	1.4	937	204	5	1.1	474	148	2.5	0.8	2250	272	12	1.4	1230	226	6.6	1.2	5812	352	31	1.8	4643	345	24.8	1.8	1983	228	10.6
0500000US39093	39093	Lorain County, Ohio	117609	841	117609	(X)	79657	901	67.7	0.7	33053	887	28.1	0.7	57445	1063	48.8	0.8	20641	788	17.6	0.6	5821	540	4.9	0.5	2542	385	2.2	0.3	16391	745	13.9	0.6	9870	609	8.4	0.5	37952	864	32.3	0.7	32272	867	27.4	0.7	13450	570	11.4
0500000US39095	39095	Lucas County, Ohio	178477	961	178477	(X)	105877	1262	59.3	0.6	47603	1140	26.7	0.6	68744	1135	38.5	0.6	25585	897	14.3	0.5	9815	696	5.5	0.4	5282	607	3	0.3	27318	917	15.3	0.5	16736	769	9.4	0.4	72600	1186	40.7	0.6	60096	1238	33.7	0.7	20742	834	11.6
0500000US39097	39097	Madison County, Ohio	14809	201	14809	(X)	10290	272	69.5	1.9	4308	270	29.1	1.8	7701	301	52	2.1	2805	255	18.9	1.7	832	195	5.6	1.3	493	149	3.3	1	1757	221	11.9	1.5	1010	187	6.8	1.2	4519	300	30.5	1.9	3670	261	24.8	1.7	1755	182	11.9
0500000US39099	39099	Mahoning County, Ohio	97484	837	97484	(X)	60361	925	61.9	0.9	23227	615	23.8	0.6	41705	902	42.8	0.9	13450	569	13.8	0.6	4596	459	4.7	0.5	2155	321	2.2	0.3	14060	660	14.4	0.7	7622	503	7.8	0.5	37123	998	38.1	0.9	32494	992	33.3	0.9	13945	600	14.3
0500000US39101	39101	Marion County, Ohio	24418	443	24418	(X)	16430	449	67.3	1.8	6175	323	25.3	1.2	12070	530	49.4	2.2	3945	329	16.2	1.3	985	221	4	0.9	550	160	2.3	0.6	3375	385	13.8	1.6	1680	272	6.9	1.1	7988	493	32.7	1.8	6920	448	28.3	1.6	3067	264	12.6
0500000US39103	39103	Medina County, Ohio	66465	509	66465	(X)	47804	601	71.9	0.9	19738	545	29.7	0.8	39396	711	59.3	1	15330	569	23.1	0.8	2666	280	4	0.4	1320	228	2	0.3	5742	461	8.6	0.7	3088	392	4.6	0.6	18661	643	28.1	0.9	16098	650	24.2	0.9	7447	478	11.2
0500000US39105	39105	Meigs County, Ohio	9204	270	9204	(X)	6322	301	68.7	2.5	2390	172	26	1.5	4645	275	50.5	2.7	1527	158	16.6	1.6	617	147	6.7	1.6	367	121	4	1.3	1060	149	11.5	1.5	496	118	5.4	1.2	2882	240	31.3	2.5	2426	206	26.4	2.3	979	130	10.6
0500000US39107	39107	Mercer County, Ohio	16109	264	16109	(X)	11473	295	71.2	1.7	4719	255	29.3	1.5	9381	314	58.2	1.9	3548	235	22	1.4	922	182	5.7	1.1	506	157	3.1	1	1170	194	7.3	1.2	665	155	4.1	1	4636	303	28.8	1.7	4076	285	25.3	1.6	2107	216	13.1
0500000US39109	39109	Miami County, Ohio	41106	524	41106	(X)	27237	675	66.3	1.6	11003	455	26.8	1.1	21297	668	51.8	1.6	7377	360	17.9	0.9	2110	328	5.1	0.8	1316	303	3.2	0.7	3830	296	9.3	0.7	2310	254	5.6	0.6	13869	695	33.7	1.6	11363	606	27.6	1.4	5172	396	12.6
0500000US39111	39111	Monroe County, Ohio	5986	191	5986	(X)	4261	209	71.2	2.9	1448	133	24.2	2	3201	225	53.5	3.3	881	130	14.7	2	437	111	7.3	1.8	296	96	4.9	1.6	623	122	10.4	2.1	271	89	4.5	1.5	1725	191	28.8	2.9	1522	183	25.4	2.8	774	114	12.9
0500000US39113	39113	Montgomery County, Ohio	222677	1411	222677	(X)	133983	1548	60.2	0.6	57368	1255	25.8	0.5	89686	1437	40.3	0.6	32038	1055	14.4	0.5	10294	685	4.6	0.3	5455	522	2.4	0.2	34003	1066	15.3	0.5	19875	943	8.9	0.4	88694	1432	39.8	0.6	75585	1252	33.9	0.5	28471	860	12.8
0500000US39115	39115	Morgan County, Ohio	5932	246	5932	(X)	4115	223	69.4	2.9	1390	165	23.4	2.4	3224	184	54.3	3.2	886	140	14.9	2.2	297	93	5	1.5	162	71	2.7	1.2	594	130	10	2.1	342	104	5.8	1.7	1817	195	30.6	2.9	1558	179	26.3	2.8	759	137	12.8
0500000US39117	39117	Morrow County, Ohio	12606	321	12606	(X)	9365	397	74.3	2.5	3518	287	27.9	2	7540	415	59.8	3	2584	289	20.5	2.1	563	149	4.5	1.2	202	95	1.6	0.8	1262	257	10	2	732	208	5.8	1.6	3241	323	25.7	2.5	2703	287	21.4	2.2	1344	189	10.7
0500000US39119	39119	Muskingum County, Ohio	34178	431	34178	(X)	22686	516	66.4	1.6	9357	381	27.4	1.1	16510	565	48.3	1.7	5771	325	16.9	1	1766	269	5.2	0.8	966	218	2.8	0.6	4410	446	12.9	1.3	2620	311	7.7	0.9	11492	611	33.6	1.6	9672	604	28.3	1.6	4195	386	12.3
0500000US39121	39121	Noble County, Ohio	4863	199	4863	(X)	3214	209	66.1	3.5	627	88	12.9	1.6	2775	222	57.1	3.8	439	94	9	1.8	134	69	2.8	1.4	40	31	0.8	0.6	305	93	6.3	1.9	148	66	3	1.4	1649	188	33.9	3.5	1540	183	31.7	3.5	814	149	16.7
0500000US39123	39123	Ottawa County, Ohio	17384	388	17384	(X)	11737	341	67.5	1.6	4033	250	23.2	1.3	9294	311	53.5	1.7	2676	193	15.4	1	795	188	4.6	1.1	453	134	2.6	0.8	1648	184	9.5	1	904	171	5.2	1	5647	319	32.5	1.6	4814	272	27.7	1.4	2344	201	13.5
0500000US39125	39125	Paulding County, Ohio	7659	196	7659	(X)	5350	236	69.9	2.7	1998	181	26.1	2.2	4324	235	56.5	3	1480	155	19.3	2	367	90	4.8	1.2	244	83	3.2	1.1	659	128	8.6	1.6	274	92	3.6	1.2	2309	223	30.1	2.7	2063	212	26.9	2.7	939	115	12.3
0500000US39127	39127	Perry County, Ohio	13535	270	13535	(X)	10047	320	74.2	2	4019	314	29.7	2.1	7488	385	55.3	2.6	2697	312	19.9	2.2	854	185	6.3	1.4	421	126	3.1	0.9	1705	212	12.6	1.6	901	175	6.7	1.3	3488	292	25.8	2	2874	272	21.2	1.9	1237	177	9.1
0500000US39129	39129	Pickaway County, Ohio	19173	380	19173	(X)	14004	408	73	1.9	5838	328	30.4	1.6	11009	389	57.4	1.9	4193	293	21.9	1.5	899	231	4.7	1.2	552	192	2.9	1	2096	263	10.9	1.4	1093	208	5.7	1.1	5169	408	27	1.9	4279	375	22.3	1.8	1843	237	9.6
0500000US39131	39131	Pike County, Ohio	10908	302	10908	(X)	7376	349	67.6	3	3004	297	27.5	2.6	5021	362	46	3.3	1848	256	16.9	2.2	930	207	8.5	1.8	446	141	4.1	1.3	1425	218	13.1	2	710	190	6.5	1.7	3532	361	32.4	3	3075	347	28.2	3	1314	208	12
0500000US39133	39133	Portage County, Ohio	61585	735	61585	(X)	39693	772	64.5	1.2	15534	679	25.2	1.1	30103	771	48.9	1.3	10563	566	17.2	0.9	2793	381	4.5	0.6	1186	270	1.9	0.4	6797	540	11	0.9	3785	400	6.1	0.6	21892	865	35.5	1.2	16622	778	27	1.2	5750	387	9.3
0500000US39135	39135	Preble County, Ohio	16048	231	16048	(X)	11524	273	71.8	1.5	4462	186	27.8	1.2	9007	276	56.1	1.7	3071	157	19.1	1.1	761	154	4.7	1	472	121	2.9	0.7	1756	211	10.9	1.3	919	153	5.7	0.9	4524	261	28.2	1.5	3716	262	23.2	1.6	1760	157	11
0500000US39137	39137	Putnam County, Ohio	13092	165	13092	(X)	9628	244	73.5	1.8	4105	198	31.4	1.5	8345	268	63.7	2.1	3313	214	25.3	1.7	426	101	3.3	0.8	263	95	2	0.7	857	153	6.5	1.2	529	139	4	1.1	3464	252	26.5	1.8	2981	266	22.8	2	1529	154	11.7
0500000US39139	39139	Richland County, Ohio	47935	600	47935	(X)	30724	627	64.1	1.1	12016	499	25.1	0.9	22804	591	47.6	1.2	7321	449	15.3	0.9	1879	282	3.9	0.6	1045	213	2.2	0.4	6041	410	12.6	0.8	3650	313	7.6	0.6	17211	608	35.9	1.1	14841	666	31	1.3	6878	340	14.3
0500000US39141	39141	Ross County, Ohio	28308	397	28308	(X)	19672	537	69.5	1.8	8031	371	28.4	1.3	14364	507	50.7	1.8	5050	340	17.8	1.2	1173	211	4.1	0.7	515	135	1.8	0.5	4135	372	14.6	1.3	2466	366	8.7	1.3	8636	530	30.5	1.8	7213	492	25.5	1.7	3173	312	11.2
0500000US39143	39143	Sandusky County, Ohio	23666	298	23666	(X)	15980	414	67.5	1.5	6376	345	26.9	1.3	11844	393	50	1.6	3800	298	16.1	1.2	1421	224	6	0.9	859	196	3.6	0.8	2715	271	11.5	1.1	1717	255	7.3	1	7686	379	32.5	1.5	6348	338	26.8	1.4	2888	209	12.2
0500000US39145	39145	Scioto County, Ohio	29778	501	29778	(X)	18950	656	63.6	2.1	7448	430	25	1.4	13865	573	46.6	1.8	4613	399	15.5	1.3	1568	229	5.3	0.8	970	214	3.3	0.7	3517	396	11.8	1.3	1865	278	6.3	0.9	10828	691	36.4	2.1	8995	609	30.2	1.9	3827	328	12.9
0500000US39147	39147	Seneca County, Ohio	21349	338	21349	(X)	14374	342	67.3	1.3	5764	269	27	1.1	10784	354	50.5	1.5	3589	248	16.8	1.1	1068	179	5	0.8	586	130	2.7	0.6	2522	266	11.8	1.3	1589	200	7.4	0.9	6975	321	32.7	1.3	5801	324	27.2	1.4	2466	172	11.6
0500000US39149	39149	Shelby County, Ohio	18428	289	18428	(X)	13334	343	72.4	1.6	5674	297	30.8	1.5	10443	325	56.7	1.8	3876	286	21	1.6	919	222	5	1.2	545	195	3	1	1972	268	10.7	1.4	1253	213	6.8	1.2	5094	324	27.6	1.6	4237	270	23	1.4	1771	214	9.6
0500000US39151	39151	Stark County, Ohio	151101	1056	151101	(X)	99415	1399	65.8	0.8	40166	1031	26.6	0.6	73126	1223	48.4	0.8	25052	925	16.6	0.6	7830	673	5.2	0.4	4497	552	3	0.4	18459	789	12.2	0.5	10617	629	7	0.4	51686	1254	34.2	0.8	43165	1221	28.6	0.8	17749	725	11.7
0500000US39153	39153	Summit County, Ohio	221887	1049	221887	(X)	138243	1537	62.3	0.6	56665	946	25.5	0.4	99783	1445	45	0.6	36346	956	16.4	0.4	9479	750	4.3	0.3	4136	559	1.9	0.3	28981	1018	13.1	0.4	16183	832	7.3	0.4	83644	1491	37.7	0.6	70284	1595	31.7	0.7	26389	937	11.9
0500000US39155	39155	Trumbull County, Ohio	86508	648	86508	(X)	55179	795	63.8	0.9	20602	657	23.8	0.8	39417	748	45.6	0.8	12160	563	14.1	0.6	4344	406	5	0.5	2002	298	2.3	0.3	11418	512	13.2	0.6	6440	444	7.4	0.5	31329	829	36.2	0.9	27401	732	31.7	0.8	11679	534	13.5
0500000US39157	39157	Tuscarawas County, Ohio	36325	456	36325	(X)	24676	511	67.9	1.3	9598	436	26.4	1.1	19453	560	53.6	1.6	6757	371	18.6	1	1473	240	4.1	0.7	814	193	2.2	0.5	3750	384	10.3	1	2027	276	5.6	0.7	11649	538	32.1	1.3	9796	507	27	1.3	4549	347	12.5
0500000US39159	39159	Union County, Ohio	18798	290	18798	(X)	13876	347	73.8	1.6	6735	327	35.8	1.7	11376	385	60.5	1.8	5201	297	27.7	1.5	990	235	5.3	1.3	573	172	3	0.9	1510	228	8	1.2	961	200	5.1	1.1	4922	316	26.2	1.6	3876	318	20.6	1.6	1510	228	8
0500000US39161	39161	Van Wert County, Ohio	11427	207	11427	(X)	7912	255	69.2	2.1	3144	173	27.5	1.4	6193	286	54.2	2.4	2197	175	19.2	1.5	600	131	5.3	1.2	327	95	2.9	0.8	1119	156	9.8	1.4	620	107	5.4	0.9	3515	255	30.8	2.1	3026	223	26.5	1.8	1350	154	11.8
0500000US39163	39163	Vinton County, Ohio	4942	189	4942	(X)	3376	175	68.3	3.4	1421	120	28.8	2.3	2508	203	50.7	4	885	109	17.9	2.2	291	99	5.9	2	190	83	3.8	1.7	577	117	11.7	2.3	346	87	7	1.7	1566	195	31.7	3.4	1355	167	27.4	2.9	593	119	12
0500000US39165	39165	Warren County, Ohio	79466	670	79466	(X)	59436	1051	74.8	1.1	27740	725	34.9	0.8	50231	1036	63.2	1.2	22776	668	28.7	0.8	2922	446	3.7	0.6	1502	349	1.9	0.4	6283	524	7.9	0.7	3462	425	4.4	0.5	20030	870	25.2	1.1	16855	773	21.2	1	6642	475	8.4
0500000US39167	39167	Washington County, Ohio	25306	351	25306	(X)	16646	449	65.8	1.5	5907	341	23.3	1.3	12974	439	51.3	1.7	4032	301	15.9	1.2	1285	236	5.1	0.9	712	185	2.8	0.7	2387	286	9.4	1.1	1163	206	4.6	0.8	8660	401	34.2	1.5	7452	390	29.4	1.5	3062	317	12.1
0500000US39169	39169	Wayne County, Ohio	43037	415	43037	(X)	30431	587	70.7	1.2	12421	420	28.9	0.9	24447	629	56.8	1.3	9173	461	21.3	1	1891	294	4.4	0.7	833	192	1.9	0.4	4093	375	9.5	0.9	2415	287	5.6	0.7	12606	514	29.3	1.2	10954	470	25.5	1.1	4811	308	11.2
0500000US39171	39171	Williams County, Ohio	15077	313	15077	(X)	9696	338	64.3	1.9	3995	233	26.5	1.4	7454	325	49.4	2.1	2682	223	17.8	1.4	730	143	4.8	0.9	435	119	2.9	0.8	1512	175	10	1.1	878	167	5.8	1.1	5381	322	35.7	1.9	4622	325	30.7	2	1952	196	12.9
0500000US39173	39173	Wood County, Ohio	50025	481	50025	(X)	31025	599	62	1.1	13360	433	26.7	0.8	24996	580	50	1.1	9738	419	19.5	0.8	1997	277	4	0.6	1246	234	2.5	0.5	4032	399	8.1	0.8	2376	310	4.7	0.6	19000	615	38	1.1	14456	648	28.9	1.3	5016	313	10
0500000US39175	39175	Wyandot County, Ohio	9144	163	9144	(X)	6130	273	67	2.7	2374	173	26	1.7	4848	262	53	2.7	1628	155	17.8	1.6	400	109	4.4	1.2	202	83	2.2	0.9	882	144	9.6	1.6	544	111	5.9	1.2	3014	252	33	2.7	2369	222	25.9	2.4	1072	153	11.7
0500000US42001	42001	Adams County, Pennsylvania	38269	380	38269	(X)	27320	425	71.4	1.2	9992	290	26.1	0.7	22084	446	57.7	1.2	7335	300	19.2	0.8	1466	201	3.8	0.5	685	140	1.8	0.4	3770	289	9.9	0.8	1972	238	5.2	0.6	10949	499	28.6	1.2	9173	479	24	1.2	4332	351	11.3
0500000US42003	42003	Allegheny County, Pennsylvania	531075	2098	531075	(X)	303753	2085	57.2	0.4	121208	1726	22.8	0.3	224117	2062	42.2	0.4	82259	1486	15.5	0.3	19100	894	3.6	0.2	8164	589	1.5	0.1	60536	1535	11.4	0.3	30785	1002	5.8	0.2	227322	2342	42.8	0.4	188755	2109	35.5	0.4	72596	1440	13.7
0500000US42005	42005	Armstrong County, Pennsylvania	28250	334	28250	(X)	18908	362	66.9	1.2	6539	295	23.1	1	14668	400	51.9	1.4	4468	266	15.8	0.9	1408	155	5	0.6	640	133	2.3	0.5	2832	241	10	0.8	1431	147	5.1	0.5	9342	362	33.1	1.2	8147	343	28.8	1.1	4239	272	15
0500000US42007	42007	Beaver County, Pennsylvania	69921	628	69921	(X)	45872	600	65.6	0.8	15879	475	22.7	0.7	34731	662	49.7	0.9	10465	463	15	0.6	3012	358	4.3	0.5	1251	213	1.8	0.3	8129	513	11.6	0.7	4163	366	6	0.5	24049	669	34.4	0.8	20880	652	29.9	0.8	10096	452	14.4
0500000US42009	42009	Bedford County, Pennsylvania	19757	295	19757	(X)	13584	309	68.8	1.5	4595	177	23.3	0.8	10896	287	55.2	1.6	3276	170	16.6	0.9	1062	144	5.4	0.7	517	96	2.6	0.5	1626	171	8.2	0.8	802	129	4.1	0.6	6173	345	31.2	1.5	5197	330	26.3	1.5	2788	210	14.1
0500000US42011	42011	Berks County, Pennsylvania	152451	786	152451	(X)	105227	994	69	0.7	44649	868	29.3	0.5	77837	1185	51.1	0.8	28999	834	19	0.5	7916	590	5.2	0.4	3998	416	2.6	0.3	19474	816	12.8	0.5	11652	628	7.6	0.4	47224	1086	31	0.7	38306	1049	25.1	0.6	17313	645	11.4
0500000US42013	42013	Blair County, Pennsylvania	50954	438	50954	(X)	32372	543	63.5	1	12146	402	23.8	0.7	24528	635	48.1	1.3	8094	387	15.9	0.7	2246	259	4.4	0.5	999	185	2	0.4	5598	382	11	0.7	3053	287	6	0.6	18582	576	36.5	1	15960	591	31.3	1.1	7601	407	14.9
0500000US42015	42015	Bradford County, Pennsylvania	24483	329	24483	(X)	16667	407	68.1	1.6	5992	269	24.5	1	13072	415	53.4	1.7	4012	256	16.4	1	1347	156	5.5	0.6	753	133	3.1	0.5	2248	236	9.2	1	1227	178	5	0.7	7816	419	31.9	1.6	6461	382	26.4	1.5	3146	223	12.8
0500000US42017	42017	Bucks County, Pennsylvania	233517	1036	233517	(X)	166486	1475	71.3	0.6	66004	988	28.3	0.4	135764	1732	58.1	0.7	52587	1046	22.5	0.4	8846	613	3.8	0.3	3313	354	1.4	0.2	21876	837	9.4	0.4	10104	618	4.3	0.3	67031	1413	28.7	0.6	56348	1283	24.1	0.5	24780	844	10.6
0500000US42019	42019	Butler County, Pennsylvania	74762	515	74762	(X)	50894	592	68.1	0.9	20120	463	26.9	0.6	41747	683	55.8	0.9	15659	432	20.9	0.6	3220	324	4.3	0.4	1549	258	2.1	0.3	5927	369	7.9	0.5	2912	276	3.9	0.4	23868	738	31.9	0.9	19775	722	26.5	0.9	8516	374	11.4
0500000US42021	42021	Cambria County, Pennsylvania	57214	483	57214	(X)	36128	507	63.1	1	12880	374	22.5	0.6	26964	591	47.1	1.1	8252	355	14.4	0.6	2531	248	4.4	0.4	1200	171	2.1	0.3	6633	379	11.6	0.7	3428	299	6	0.5	21086	662	36.9	1	18413	616	32.2	0.9	8721	405	15.2
0500000US42023	42023	Cameron County, Pennsylvania	2187	124	2187	(X)	1292	98	59.1	3.5	455	66	20.8	2.6	936	78	42.8	3.4	197	47	9	2.1	133	43	6.1	1.9	88	36	4	1.6	223	54	10.2	2.3	170	49	7.8	2.2	895	96	40.9	3.5	795	86	36.4	3.3	385	59	17.6
0500000US42025	42025	Carbon County, Pennsylvania	25813	436	25813	(X)	16910	443	65.5	1.7	5913	325	22.9	1.2	13093	495	50.7	2.1	3913	280	15.2	1.1	1099	210	4.3	0.8	624	165	2.4	0.6	2718	356	10.5	1.4	1376	242	5.3	0.9	8903	519	34.5	1.7	6964	475	27	1.6	3391	328	13.1
0500000US42027	42027	Centre County, Pennsylvania	57037	780	57037	(X)	32853	675	57.6	1.1	12900	450	22.6	0.7	26904	712	47.2	1.2	10071	414	17.7	0.7	2082	366	3.7	0.6	743	165	1.3	0.3	3867	443	6.8	0.8	2086	350	3.7	0.6	24184	811	42.4	1.1	16052	766	28.1	1.3	4973	425	8.7
0500000US42029	42029	Chester County, Pennsylvania	186721	813	186721	(X)	131242	1241	70.3	0.6	58602	957	31.4	0.5	108210	1054	58	0.5	47273	788	25.3	0.4	6777	567	3.6	0.3	3344	420	1.8	0.2	16255	676	8.7	0.4	7985	534	4.3	0.3	55479	1062	29.7	0.6	43726	1009	23.4	0.5	17720	695	9.5
0500000US42031	42031	Clarion County, Pennsylvania	15848	264	15848	(X)	9948	276	62.8	1.7	3647	241	23	1.4	7968	228	50.3	1.4	2559	160	16.1	0.9	661	107	4.2	0.7	350	97	2.2	0.6	1319	149	8.3	0.9	738	138	4.7	0.9	5900	301	37.2	1.7	4431	291	28	1.7	1833	129	11.6
0500000US42033	42033	Clearfield County, Pennsylvania	31303	404	31303	(X)	20671	423	66	1.2	7244	334	23.1	1	16382	407	52.3	1.3	5081	309	16.2	1	1443	217	4.6	0.7	756	164	2.4	0.5	2846	264	9.1	0.8	1407	218	4.5	0.7	10632	434	34	1.2	9241	425	29.5	1.3	4424	332	14.1
0500000US42035	42035	Clinton County, Pennsylvania	14710	279	14710	(X)	9779	291	66.5	1.6	3612	221	24.6	1.3	7603	286	51.7	1.7	2408	159	16.4	1	709	111	4.8	0.8	410	95	2.8	0.6	1467	204	10	1.4	794	142	5.4	0.9	4931	251	33.5	1.6	3881	226	26.4	1.5	1768	148	12
0500000US42037	42037	Columbia County, Pennsylvania	26356	451	26356	(X)	16767	399	63.6	1.6	6201	286	23.5	1	13086	344	49.7	1.5	4184	209	15.9	0.8	1064	140	4	0.5	554	109	2.1	0.4	2617	284	9.9	1.1	1463	213	5.6	0.8	9589	512	36.4	1.6	7126	380	27	1.3	3242	258	12.3
0500000US42039	42039	Crawford County, Pennsylvania	34526	378	34526	(X)	23147	438	67	1.2	8859	328	25.7	0.8	17728	472	51.3	1.4	5814	296	16.8	0.9	1740	217	5	0.6	921	174	2.7	0.5	3679	354	10.7	1	2124	267	6.2	0.8	11379	470	33	1.2	9344	447	27.1	1.2	4397	249	12.7
0500000US42041	42041	Cumberland County, Pennsylvania	96501	626	96501	(X)	62004	898	64.3	0.8	24599	791	25.5	0.8	50299	862	52.1	0.8	17953	658	18.6	0.6	3312	403	3.4	0.4	1868	310	1.9	0.3	8393	616	8.7	0.6	4778	474	5	0.5	34497	843	35.7	0.8	28668	806	29.7	0.8	11568	540	12
0500000US42043	42043	Dauphin County, Pennsylvania	110211	786	110211	(X)	69660	1113	63.2	0.9	29167	795	26.5	0.7	49078	940	44.5	0.9	17912	575	16.3	0.5	5270	441	4.8	0.4	2751	322	2.5	0.3	15312	686	13.9	0.6	8504	573	7.7	0.5	40551	1064	36.8	0.9	33882	964	30.7	0.8	12185	530	11.1
0500000US42045	42045	Delaware County, Pennsylvania	203610	1156	203610	(X)	136213	1366	66.9	0.6	59380	1159	29.2	0.5	96938	1324	47.6	0.6	40159	1065	19.7	0.5	9538	602	4.7	0.3	4547	472	2.2	0.2	29737	897	14.6	0.5	14674	722	7.2	0.4	67397	1318	33.1	0.6	58422	1189	28.7	0.5	23941	755	11.8
0500000US42047	42047	Elk County, Pennsylvania	13362	271	13362	(X)	8538	310	63.9	2.1	2999	197	22.4	1.4	6695	294	50.1	2.2	2084	194	15.6	1.4	633	126	4.7	0.9	351	96	2.6	0.7	1210	210	9.1	1.5	564	115	4.2	0.8	4824	314	36.1	2.1	4356	298	32.6	2	1907	205	14.3
0500000US42049	42049	Erie County, Pennsylvania	110047	756	110047	(X)	69521	873	63.2	0.8	28822	702	26.2	0.6	50033	952	45.5	0.8	17260	683	15.7	0.6	5015	350	4.6	0.3	2722	293	2.5	0.3	14473	741	13.2	0.7	8840	651	8	0.6	40526	925	36.8	0.8	33055	866	30	0.8	12987	512	11.8
0500000US42051	42051	Fayette County, Pennsylvania	53654	560	53654	(X)	33477	651	62.4	1.1	11800	493	22	0.9	24529	615	45.7	1.1	7466	436	13.9	0.8	2391	298	4.5	0.6	1119	198	2.1	0.4	6557	410	12.2	0.8	3215	292	6	0.5	20177	684	37.6	1.1	17469	674	32.6	1.2	8027	494	15
0500000US42053	42053	Forest County, Pennsylvania	1816	692	1816	(X)	1061	382	58.4	3.6	80	227	4.4	9.6	933	282	51.4	5.1	45	149	2.5	6.5	24	31	1.3	1.2	2	29	0.1	1.4	104	83	5.7	2.5	33	54	1.8	2.1	755	323	41.6	3.6	678	214	37.3	4.4	433	61	23.8
0500000US42055	42055	Franklin County, Pennsylvania	59392	515	59392	(X)	41017	699	69.1	1.2	16757	603	28.2	1	32736	706	55.1	1.2	11754	487	19.8	0.8	2431	380	4.1	0.6	1328	253	2.2	0.4	5850	444	9.8	0.7	3675	407	6.2	0.7	18375	798	30.9	1.2	15565	735	26.2	1.2	6797	456	11.4
0500000US42057	42057	Fulton County, Pennsylvania	5989	121	5989	(X)	4161	136	69.5	2.1	1502	100	25.1	1.5	3317	120	55.4	2	1045	86	17.4	1.4	339	76	5.7	1.2	205	55	3.4	0.9	505	77	8.4	1.3	252	57	4.2	0.9	1828	139	30.5	2.1	1570	127	26.2	1.9	747	72	12.5
0500000US42059	42059	Greene County, Pennsylvania	14400	303	14400	(X)	9545	307	66.3	2	3399	210	23.6	1.4	7057	264	49	1.9	2133	153	14.8	1.1	720	157	5	1.1	374	111	2.6	0.8	1768	206	12.3	1.4	892	184	6.2	1.3	4855	321	33.7	2	4046	295	28.1	1.9	1807	183	12.5
0500000US42061	42061	Huntingdon County, Pennsylvania	16975	337	16975	(X)	11482	330	67.6	1.4	4415	221	26	1.1	9282	274	54.7	1.4	3219	169	19	0.9	787	115	4.6	0.7	437	84	2.6	0.5	1413	169	8.3	1	759	136	4.5	0.8	5493	252	32.4	1.4	4766	222	28.1	1.3	2367	142	13.9
0500000US42063	42063	Indiana County, Pennsylvania	34059	465	34059	(X)	21365	443	62.7	1.3	7463	319	21.9	0.9	17215	471	50.5	1.3	5667	301	16.6	0.8	1435	230	4.2	0.7	672	135	2	0.4	2715	254	8	0.8	1124	157	3.3	0.5	12694	509	37.3	1.3	9673	485	28.4	1.4	3942	273	11.6
0500000US42065	42065	Jefferson County, Pennsylvania	18360	288	18360	(X)	12346	240	67.2	1.3	4543	183	24.7	0.9	9774	251	53.2	1.5	3119	157	17	0.9	920	123	5	0.7	433	97	2.4	0.5	1652	159	9	0.8	991	134	5.4	0.7	6014	287	32.8	1.3	5246	294	28.6	1.4	2481	163	13.5
0500000US42067	42067	Juniata County, Pennsylvania	9326	171	9326	(X)	6430	226	68.9	2.3	2295	138	24.6	1.5	5228	217	56.1	2.2	1722	119	18.5	1.3	489	97	5.2	1.1	243	70	2.6	0.8	713	109	7.6	1.2	330	59	3.5	0.6	2896	229	31.1	2.3	2359	200	25.3	2.1	1138	158	12.2
0500000US42069	42069	Lackawanna County, Pennsylvania	85174	613	85174	(X)	51845	864	60.9	1	19705	669	23.1	0.7	37756	879	44.3	1	12589	595	14.8	0.7	3840	396	4.5	0.5	1808	276	2.1	0.3	10249	623	12	0.7	5308	451	6.2	0.5	33329	884	39.1	1	28095	869	33	1	12114	549	14.2
0500000US42071	42071	Lancaster County, Pennsylvania	196171	918	196171	(X)	138123	1194	70.4	0.6	56061	1027	28.6	0.5	111938	1463	57.1	0.7	41893	1105	21.4	0.5	7547	639	3.8	0.3	3780	481	1.9	0.2	18638	871	9.5	0.4	10388	676	5.3	0.3	58048	1152	29.6	0.6	46596	1163	23.8	0.6	20829	847	10.6
0500000US42073	42073	Lawrence County, Pennsylvania	36302	464	36302	(X)	24098	475	66.4	1.2	8476	300	23.3	0.8	17765	416	48.9	1.1	5330	228	14.7	0.6	1694	217	4.7	0.6	720	174	2	0.5	4639	287	12.8	0.8	2426	224	6.7	0.6	12204	513	33.6	1.2	10626	499	29.3	1.2	4933	272	13.6
0500000US42075	42075	Lebanon County, Pennsylvania	52247	434	52247	(X)	35822	640	68.6	1.2	14217	571	27.2	1.1	27350	605	52.3	1.2	9413	451	18	0.8	2652	318	5.1	0.6	1366	233	2.6	0.4	5820	437	11.1	0.8	3438	335	6.6	0.6	16425	651	31.4	1.2	14054	601	26.9	1.1	6229	375	11.9
0500000US42077	42077	Lehigh County, Pennsylvania	135363	775	135363	(X)	90319	1196	66.7	0.8	39370	935	29.1	0.6	65600	1156	48.5	0.8	25441	830	18.8	0.6	6468	545	4.8	0.4	3107	411	2.3	0.3	18251	726	13.5	0.5	10822	542	8	0.4	45044	1123	33.3	0.8	36707	1107	27.1	0.8	14787	665	10.9
0500000US42079	42079	Luzerne County, Pennsylvania	127514	915	127514	(X)	80743	901	63.3	0.7	31099	753	24.4	0.6	56854	944	44.6	0.7	18513	716	14.5	0.5	6844	529	5.4	0.4	2909	371	2.3	0.3	17045	655	13.4	0.5	9677	526	7.6	0.4	46771	984	36.7	0.7	40935	1037	32.1	0.7	19064	680	15
0500000US42081	42081	Lycoming County, Pennsylvania	45587	608	45587	(X)	29609	603	65	1.2	11638	449	25.5	0.9	22591	548	49.6	1.2	7723	376	16.9	0.8	2122	253	4.7	0.5	1184	192	2.6	0.4	4896	377	10.7	0.8	2731	327	6	0.7	15978	620	35	1.2	13311	568	29.2	1.2	5545	333	12.2
0500000US42083	42083	McKean County, Pennsylvania	17259	348	17259	(X)	11041	259	64	1.6	4224	202	24.5	1.2	7831	263	45.4	1.6	2344	189	13.6	1.1	1073	150	6.2	0.8	664	124	3.8	0.7	2137	223	12.4	1.3	1216	179	7	1.1	6218	346	36	1.6	5131	298	29.7	1.4	2132	193	12.4
0500000US42085	42085	Mercer County, Pennsylvania	45350	526	45350	(X)	30115	465	66.4	1	10942	371	24.1	0.7	22864	503	50.4	1.2	7353	339	16.2	0.7	1904	220	4.2	0.5	958	157	2.1	0.3	5347	380	11.8	0.8	2631	261	5.8	0.6	15235	570	33.6	1	13358	567	29.5	1.1	6390	363	14.1
0500000US42087	42087	Mifflin County, Pennsylvania	18695	318	18695	(X)	12525	333	67	1.6	4425	215	23.7	1	9500	324	50.8	1.8	2919	226	15.6	1.2	945	184	5.1	1	494	147	2.6	0.8	2080	241	11.1	1.2	1012	181	5.4	0.9	6170	344	33	1.6	4987	333	26.7	1.7	2594	267	13.9
0500000US42089	42089	Monroe County, Pennsylvania	57127	874	57127	(X)	40649	861	71.2	1.4	15564	675	27.2	1	31101	974	54.4	1.7	10802	641	18.9	1.1	2857	373	5	0.6	1334	290	2.3	0.5	6691	585	11.7	1	3428	409	6	0.7	16478	876	28.8	1.4	12831	761	22.5	1.2	5247	448	9.2
0500000US42091	42091	Montgomery County, Pennsylvania	309884	1043	309884	(X)	212317	1392	68.5	0.4	91889	1150	29.7	0.4	171919	1503	55.5	0.4	71973	1181	23.2	0.4	11336	605	3.7	0.2	5349	457	1.7	0.1	29062	913	9.4	0.3	14567	634	4.7	0.2	97567	1274	31.5	0.4	81163	1206	26.2	0.4	35715	918	11.5
0500000US42093	42093	Montour County, Pennsylvania	7361	170	7361	(X)	4558	192	61.9	2.6	1604	156	21.8	2	3570	177	48.5	2.4	1139	121	15.5	1.6	234	91	3.2	1.2	174	88	2.4	1.2	754	122	10.2	1.7	291	71	4	1	2803	213	38.1	2.6	2336	202	31.7	2.5	1034	146	14
0500000US42095	42095	Northampton County, Pennsylvania	112819	743	112819	(X)	78084	841	69.2	0.7	30705	781	27.2	0.7	60236	1068	53.4	0.9	21748	825	19.3	0.7	4974	471	4.4	0.4	2284	345	2	0.3	12874	586	11.4	0.5	6673	484	5.9	0.4	34735	852	30.8	0.7	28037	847	24.9	0.7	13097	606	11.6
0500000US42097	42097	Northumberland County, Pennsylvania	39192	432	39192	(X)	24877	562	63.5	1.2	9095	393	23.2	0.9	18650	484	47.6	1.1	5745	297	14.7	0.7	2036	260	5.2	0.6	1076	218	2.7	0.5	4191	380	10.7	1	2274	308	5.8	0.8	14315	459	36.5	1.2	12271	425	31.3	1.1	5521	283	14.1
0500000US42099	42099	Perry County, Pennsylvania	17883	221	17883	(X)	12651	264	70.7	1.4	4854	223	27.1	1.1	10294	287	57.6	1.6	3486	186	19.5	1	679	110	3.8	0.6	319	77	1.8	0.4	1678	204	9.4	1.1	1049	175	5.9	1	5232	275	29.3	1.4	4361	279	24.4	1.5	1916	153	10.7
0500000US42101	42101	Philadelphia County, Pennsylvania	582594	2684	582594	(X)	310729	2797	53.3	0.4	130856	2351	22.5	0.4	160700	2306	27.6	0.4	59057	1552	10.1	0.3	31390	1388	5.4	0.2	12350	931	2.1	0.2	118639	2058	20.4	0.3	59449	1548	10.2	0.3	271865	2613	46.7	0.4	225587	2590	38.7	0.4	67305	1404	11.6
0500000US42103	42103	Pike County, Pennsylvania	21135	655	21135	(X)	15231	609	72.1	1.9	5171	344	24.5	1.3	12150	563	57.5	2.1	3815	321	18.1	1.3	1192	241	5.6	1.1	490	112	2.3	0.5	1889	267	8.9	1.2	866	196	4.1	0.9	5904	456	27.9	1.9	4947	405	23.4	1.8	2489	297	11.8
0500000US42105	42105	Potter County, Pennsylvania	6623	153	6623	(X)	4271	154	64.5	1.7	1452	86	21.9	1.2	3399	143	51.3	1.9	1005	64	15.2	0.9	281	55	4.2	0.8	151	45	2.3	0.7	591	78	8.9	1.1	296	47	4.5	0.7	2352	125	35.5	1.7	2033	118	30.7	1.7	1061	89	16
0500000US42107	42107	Schuylkill County, Pennsylvania	58341	655	58341	(X)	37832	595	64.8	1	14210	477	24.4	0.8	28217	618	48.4	1.1	9520	417	16.3	0.7	3107	300	5.3	0.5	1377	222	2.4	0.4	6508	347	11.2	0.6	3313	286	5.7	0.5	20509	732	35.2	1	17701	654	30.3	1	8376	435	14.4
0500000US42109	42109	Snyder County, Pennsylvania	14528	256	14528	(X)	10522	280	72.4	1.7	4127	196	28.4	1.2	8455	269	58.2	1.9	2886	208	19.9	1.4	673	133	4.6	0.9	339	106	2.3	0.7	1394	158	9.6	1	902	140	6.2	0.9	4006	260	27.6	1.7	3387	260	23.3	1.7	1677	161	11.5
0500000US42111	42111	Somerset County, Pennsylvania	29630	325	29630	(X)	20406	375	68.9	1	7114	216	24	0.7	16680	389	56.3	1.3	5314	193	17.9	0.7	1244	216	4.2	0.7	622	132	2.1	0.4	2482	215	8.4	0.7	1178	161	4	0.5	9224	320	31.1	1	8165	321	27.6	1	4358	257	14.7
0500000US42113	42113	Sullivan County, Pennsylvania	2647	110	2647	(X)	1626	89	61.4	2.4	447	56	16.9	1.8	1333	76	50.4	2.3	316	46	11.9	1.5	135	38	5.1	1.4	63	25	2.4	0.9	158	35	6	1.3	68	19	2.6	0.7	1021	79	38.6	2.4	897	76	33.9	2.5	425	58	16.1
0500000US42115	42115	Susquehanna County, Pennsylvania	17368	227	17368	(X)	11719	238	67.5	1.2	3915	174	22.5	1	9269	270	53.4	1.4	2738	163	15.8	0.9	950	113	5.5	0.6	467	80	2.7	0.5	1500	125	8.6	0.7	710	97	4.1	0.6	5649	223	32.5	1.2	4613	200	26.6	1.1	2000	143	11.5
0500000US42117	42117	Tioga County, Pennsylvania	16340	268	16340	(X)	10998	243	67.3	1.5	3792	161	23.2	1	8709	242	53.3	1.6	2652	162	16.2	1	913	137	5.6	0.8	400	94	2.4	0.6	1376	129	8.4	0.8	740	100	4.5	0.6	5342	297	32.7	1.5	4361	249	26.7	1.4	2090	156	12.8
0500000US42119	42119	Union County, Pennsylvania	14649	440	14649	(X)	9912	362	67.7	2.3	3914	282	26.7	1.7	8034	379	54.8	2.6	2708	200	18.5	1.3	680	187	4.6	1.3	416	138	2.8	0.9	1198	284	8.2	1.9	790	250	5.4	1.7	4737	414	32.3	2.3	3885	368	26.5	2.2	1797	218	12.3
0500000US42121	42121	Venango County, Pennsylvania	21962	364	21962	(X)	14904	325	67.9	1.2	5291	243	24.1	1	11325	331	51.6	1.5	3406	227	15.5	1	1130	151	5.1	0.7	548	101	2.5	0.5	2449	240	11.2	1.1	1337	172	6.1	0.8	7058	316	32.1	1.2	6114	328	27.8	1.3	2832	182	12.9
0500000US42123	42123	Warren County, Pennsylvania	16904	329	16904	(X)	10839	288	64.1	1.4	3607	207	21.3	1.1	8755	276	51.8	1.6	2593	183	15.3	1	721	114	4.3	0.7	356	98	2.1	0.6	1363	191	8.1	1.1	658	120	3.9	0.7	6065	288	35.9	1.4	5287	282	31.3	1.5	2408	196	14.2
0500000US42125	42125	Washington County, Pennsylvania	83745	767	83745	(X)	55418	904	66.2	0.9	20377	598	24.3	0.7	43830	774	52.3	0.9	14840	501	17.7	0.6	3385	366	4	0.4	1624	237	1.9	0.3	8203	479	9.8	0.6	3913	317	4.7	0.4	28327	813	33.8	0.9	23878	717	28.5	0.8	10537	521	12.6
0500000US42127	42127	Wayne County, Pennsylvania	19173	491	19173	(X)	12938	375	67.5	1.4	4489	250	23.4	1.1	10268	367	53.6	1.7	3138	256	16.4	1.2	861	165	4.5	0.9	436	129	2.3	0.7	1809	231	9.4	1.2	915	185	4.8	1	6235	349	32.5	1.4	5201	326	27.1	1.5	2566	289	13.4
0500000US42129	42129	Westmoreland County, Pennsylvania	150697	922	150697	(X)	100335	1020	66.6	0.6	34885	703	23.1	0.5	79633	1031	52.8	0.7	24888	642	16.5	0.4	5751	428	3.8	0.3	2503	330	1.7	0.2	14951	704	9.9	0.5	7494	463	5	0.3	50362	1079	33.4	0.6	43538	1111	28.9	0.7	20819	689	13.8
0500000US42131	42131	Wyoming County, Pennsylvania	10801	183	10801	(X)	7282	256	67.4	2	2490	170	23.1	1.5	5642	236	52.2	2	1705	139	15.8	1.2	498	109	4.6	1	237	69	2.2	0.6	1142	124	10.6	1.1	548	96	5.1	0.9	3519	222	32.6	2	2835	205	26.2	1.8	1298	120	12
0500000US42133	42133	York County, Pennsylvania	168008	941	168008	(X)	116599	1189	69.4	0.7	47898	1024	28.5	0.6	89770	1078	53.4	0.6	32695	811	19.5	0.5	8243	536	4.9	0.3	4429	416	2.6	0.2	18586	709	11.1	0.4	10774	594	6.4	0.3	51409	1208	30.6	0.7	41375	1119	24.6	0.6	17416	667	10.4
0500000US51001	51001	Accomack County, Virginia	13819	537	13819	(X)	8935	527	64.7	2.9	3055	335	22.1	2.2	6539	414	47.3	2.7	1782	226	12.9	1.6	625	184	4.5	1.3	224	94	1.6	0.7	1771	271	12.8	1.8	1049	236	7.6	1.6	4884	442	35.3	2.9	4064	435	29.4	2.8	1864	293	13.5
0500000US51003	51003	Albemarle County, Virginia	39431	687	39431	(X)	25352	832	64.3	1.8	10822	519	27.4	1.3	20947	722	53.1	1.6	8426	386	21.4	1	837	179	2.1	0.5	475	137	1.2	0.3	3568	450	9	1.1	1921	382	4.9	1	14079	779	35.7	1.8	11153	654	28.3	1.6	4437	377	11.3
0500000US51005	51005	Alleghany County, Virginia	6845	221	6845	(X)	4342	197	63.4	2.8	1409	150	20.6	2	3436	192	50.2	3	1013	109	14.8	1.5	338	108	4.9	1.5	122	68	1.8	1	568	118	8.3	1.7	274	96	4	1.4	2503	230	36.6	2.8	2145	223	31.3	2.8	1265	138	18.5
0500000US51007	51007	Amelia County, Virginia	4540	247	4540	(X)	3457	267	76.1	4.4	1145	208	25.2	3.9	2752	255	60.6	5.1	768	203	16.9	4.2	70	57	1.5	1.2	52	56	1.1	1.2	635	142	14	3	325	124	7.2	2.6	1083	212	23.9	4.4	912	206	20.1	4.3	394	114	8.7
0500000US51009	51009	Amherst County, Virginia	12306	349	12306	(X)	8559	377	69.6	2.7	2777	253	22.6	1.9	6397	406	52	3	1844	211	15	1.6	439	117	3.6	0.9	232	84	1.9	0.7	1723	249	14	2.1	701	151	5.7	1.2	3747	360	30.4	2.7	3287	345	26.7	2.6	1584	244	12.9
0500000US51011	51011	Appomattox County, Virginia	5972	192	5972	(X)	4588	212	76.8	3.1	1751	182	29.3	3	3370	240	56.4	3.8	1200	166	20.1	2.8	333	116	5.6	2	153	84	2.6	1.4	885	131	14.8	2.1	398	112	6.7	1.9	1384	197	23.2	3.1	1228	188	20.6	3	668	151	11.2
0500000US51013	51013	Arlington County, Virginia	100707	913	100707	(X)	46952	858	46.6	0.8	21179	729	21	0.7	38140	995	37.9	0.9	16914	689	16.8	0.7	2841	460	2.8	0.5	1056	252	1	0.2	5971	540	5.9	0.5	3209	453	3.2	0.5	53755	1035	53.4	0.8	39365	954	39.1	0.9	7014	427	7
0500000US51015	51015	Augusta County, Virginia	28425	471	28425	(X)	20655	535	72.7	1.6	7015	383	24.7	1.3	16569	548	58.3	1.8	5204	360	18.3	1.2	1444	297	5.1	1	624	183	2.2	0.6	2642	339	9.3	1.2	1187	222	4.2	0.8	7770	495	27.3	1.6	6633	416	23.3	1.4	2759	294	9.7
0500000US51017	51017	Bath County, Virginia	2104	194	2104	(X)	1151	143	54.7	9	397	113	18.9	6.1	972	155	46.2	9.2	269	110	12.8	5.7	127	80	6	3.8	76	69	3.6	3.3	52	52	2.5	2.4	52	52	2.5	2.4	953	258	45.3	9	753	238	35.8	8.8	297	157	14.1
0500000US51019	51019	Bedford County, Virginia	30821	405	30821	(X)	21807	441	70.8	1.4	7493	359	24.3	1.1	18311	486	59.4	1.6	5912	330	19.2	1.1	983	190	3.2	0.6	354	116	1.1	0.4	2513	304	8.2	1	1227	244	4	0.8	9014	485	29.2	1.4	7771	472	25.2	1.4	3481	332	11.3
0500000US51021	51021	Bland County, Virginia	2561	243	2561	(X)	1811	200	70.7	4.7	629	113	24.6	3.4	1468	175	57.3	5.2	496	107	19.4	3.5	134	59	5.2	2.3	9	14	0.4	0.5	209	80	8.2	2.9	124	67	4.8	2.6	750	146	29.3	4.7	710	126	27.7	4.3	392	86	15.3
0500000US51023	51023	Botetourt County, Virginia	13305	264	13305	(X)	9712	342	73	2.4	3280	223	24.7	1.6	8304	320	62.4	2.4	2603	192	19.6	1.4	374	123	2.8	0.9	143	74	1.1	0.6	1034	188	7.8	1.4	534	132	4	1	3593	343	27	2.4	3013	329	22.6	2.4	1417	228	10.7
0500000US51025	51025	Brunswick County, Virginia	6148	254	6148	(X)	3987	234	64.9	3.6	1427	184	23.2	2.8	2510	219	40.8	3.6	734	139	11.9	2.2	259	114	4.2	1.8	150	77	2.4	1.2	1218	173	19.8	2.8	543	119	8.8	1.9	2161	259	35.1	3.6	1954	267	31.8	3.8	976	155	15.9
0500000US51027	51027	Buchanan County, Virginia	9124	296	9124	(X)	6287	353	68.9	3	2027	231	22.2	2.4	4737	354	51.9	3.4	1451	218	15.9	2.3	418	102	4.6	1.1	153	64	1.7	0.7	1132	205	12.4	2.2	423	124	4.6	1.3	2837	280	31.1	3	2453	249	26.9	2.7	1176	188	12.9
0500000US51029	51029	Buckingham County, Virginia	5689	243	5689	(X)	3886	236	68.3	3.4	1517	194	26.7	3.1	2721	195	47.8	3.6	908	138	16	2.3	386	144	6.8	2.5	228	126	4	2.2	779	141	13.7	2.3	381	107	6.7	1.8	1803	218	31.7	3.4	1566	211	27.5	3.4	634	118	11.1
0500000US51031	51031	Campbell County, Virginia	22294	447	22294	(X)	15330	496	68.8	1.7	5682	313	25.5	1.2	11778	395	52.8	1.7	3960	288	17.8	1.3	882	239	4	1.1	421	178	1.9	0.8	2670	280	12	1.2	1301	192	5.8	0.8	6964	415	31.2	1.7	6054	387	27.2	1.6	2555	258	11.5
0500000US51033	51033	Caroline County, Virginia	10965	490	10965	(X)	7911	453	72.1	2.8	2931	380	26.7	3.1	5354	353	48.8	3	1688	281	15.4	2.5	734	238	6.7	2.1	250	134	2.3	1.2	1823	254	16.6	2.2	993	223	9.1	1.9	3054	344	27.9	2.8	2373	268	21.6	2.4	1002	188	9.1
0500000US51035	51035	Carroll County, Virginia	12642	398	12642	(X)	8596	375	68	2.8	2900	275	22.9	2	6783	364	53.7	3	1883	247	14.9	1.9	496	165	3.9	1.3	269	144	2.1	1.1	1317	233	10.4	1.8	748	211	5.9	1.7	4046	403	32	2.8	3486	399	27.6	2.8	1671	249	13.2
0500000US51036	51036	Charles City County, Virginia	2854	81	2854	(X)	1856	84	65	2.8	497	56	17.4	1.9	1317	78	46.1	2.8	298	42	10.4	1.5	116	38	4.1	1.3	29	21	1	0.7	423	58	14.8	2	170	46	6	1.6	998	91	35	2.8	836	88	29.3	2.8	389	59	13.6
0500000US51037	51037	Charlotte County, Virginia	4594	245	4594	(X)	2988	263	65	4.1	870	157	18.9	2.9	2055	217	44.7	4	428	123	9.3	2.5	275	93	6	2	118	67	2.6	1.4	658	151	14.3	3.1	324	96	7.1	2	1606	194	35	4.1	1364	185	29.7	3.9	692	137	15.1
0500000US51041	51041	Chesterfield County, Virginia	118908	746	118908	(X)	85700	1020	72.1	0.8	37780	745	31.8	0.6	65736	1011	55.3	0.8	26960	835	22.7	0.7	5361	434	4.5	0.4	2697	331	2.3	0.3	14603	669	12.3	0.5	8123	550	6.8	0.5	33208	934	27.9	0.8	27615	892	23.2	0.7	10298	536	8.7
0500000US51043	51043	Clarke County, Virginia	5591	180	5591	(X)	3650	229	65.3	3.8	1300	174	23.3	3	2788	220	49.9	4	843	140	15.1	2.5	168	74	3	1.3	91	61	1.6	1.1	694	174	12.4	3	366	149	6.5	2.6	1941	226	34.7	3.8	1596	221	28.5	3.7	703	147	12.6
0500000US51045	51045	Craig County, Virginia	2314	171	2314	(X)	1323	174	57.2	7.9	471	121	20.4	4.9	1106	183	47.8	8.3	380	112	16.4	4.7	36	49	1.6	2.1	19	31	0.8	1.3	181	101	7.8	4.3	72	60	3.1	2.5	991	221	42.8	7.9	865	213	37.4	7.7	418	153	18.1
0500000US51047	51047	Culpeper County, Virginia	16904	287	16904	(X)	12575	393	74.4	2.1	5583	343	33	1.9	9727	373	57.5	2.3	3810	298	22.5	1.8	961	239	5.7	1.4	589	177	3.5	1	1887	287	11.2	1.6	1184	267	7	1.5	4329	376	25.6	2.1	3526	338	20.9	1.9	1626	222	9.6
0500000US51049	51049	Cumberland County, Virginia	4085	172	4085	(X)	2737	248	67	5.2	1088	194	26.6	4.4	1772	246	43.4	5.7	633	192	15.5	4.6	289	126	7.1	3	145	91	3.5	2.2	676	180	16.5	4.4	310	143	7.6	3.5	1348	216	33	5.2	1185	200	29	4.8	598	148	14.6
0500000US51051	51051	Dickenson County, Virginia	6055	232	6055	(X)	4171	282	68.9	3.9	1599	182	26.4	2.7	3180	229	52.5	3.4	1120	129	18.5	2	383	111	6.3	1.8	199	86	3.3	1.4	608	122	10	1.9	280	95	4.6	1.5	1884	244	31.1	3.9	1759	241	29.1	3.8	753	151	12.4
0500000US51053	51053	Dinwiddie County, Virginia	10344	287	10344	(X)	7317	401	70.7	3.4	2781	243	26.9	2.2	4980	341	48.1	3.1	1679	199	16.2	1.9	622	162	6	1.6	218	94	2.1	0.9	1715	261	16.6	2.5	884	215	8.5	2.1	3027	363	29.3	3.4	2617	338	25.3	3.2	1011	196	9.8
0500000US51057	51057	Essex County, Virginia	4447	213	4447	(X)	2784	216	62.6	3.8	893	182	20.1	3.7	1988	210	44.7	4.4	533	137	12	2.9	310	105	7	2.3	128	91	2.9	2	486	114	10.9	2.5	232	96	5.2	2.1	1663	186	37.4	3.8	1408	183	31.7	3.9	619	128	13.9
0500000US51059	51059	Fairfax County, Virginia	393358	1141	393358	(X)	280739	2022	71.4	0.4	135875	1649	34.5	0.4	228435	2307	58.1	0.5	110709	1683	28.1	0.4	15835	774	4	0.2	6835	554	1.7	0.1	36469	1208	9.3	0.3	18331	1017	4.7	0.3	112619	1705	28.6	0.4	88252	1737	22.4	0.4	27051	829	6.9
0500000US51061	51061	Fauquier County, Virginia	23890	374	23890	(X)	17262	417	72.3	1.7	7148	321	29.9	1.3	14589	485	61.1	2.1	5755	326	24.1	1.3	818	192	3.4	0.8	405	124	1.7	0.5	1855	268	7.8	1.1	988	204	4.1	0.9	6628	454	27.7	1.7	5343	397	22.4	1.5	2506	240	10.5
0500000US51063	51063	Floyd County, Virginia	6303	249	6303	(X)	4312	269	68.4	4.3	1570	239	24.9	3.5	3687	248	58.5	4.1	1224	206	19.4	3.1	105	61	1.7	1	61	42	1	0.7	520	168	8.3	2.7	285	138	4.5	2.2	1991	311	31.6	4.3	1693	285	26.9	4.1	870	184	13.8
0500000US51065	51065	Fluvanna County, Virginia	9829	224	9829	(X)	7317	302	74.4	3.2	2557	205	26	2.1	6041	280	61.5	3.2	1942	198	19.8	2	422	138	4.3	1.4	273	132	2.8	1.3	854	198	8.7	2	342	151	3.5	1.5	2512	340	25.6	3.2	2040	316	20.8	3	927	193	9.4
0500000US51067	51067	Franklin County, Virginia	22976	488	22976	(X)	16471	513	71.7	2	5395	376	23.5	1.5	13169	498	57.3	2.2	3742	301	16.3	1.3	828	259	3.6	1.1	359	173	1.6	0.8	2474	333	10.8	1.4	1294	267	5.6	1.1	6505	520	28.3	2	5696	495	24.8	1.9	2793	294	12.2
0500000US51069	51069	Frederick County, Virginia	29914	485	29914	(X)	22227	600	74.3	1.7	9500	433	31.8	1.4	17937	571	60	1.8	7324	378	24.5	1.3	1391	253	4.6	0.8	806	222	2.7	0.7	2899	346	9.7	1.1	1370	281	4.6	0.9	7687	539	25.7	1.7	6165	525	20.6	1.7	2766	280	9.2
0500000US51071	51071	Giles County, Virginia	7290	232	7290	(X)	4898	252	67.2	3.3	1908	209	26.2	2.7	3562	260	48.9	3.7	1226	190	16.8	2.6	469	136	6.4	1.9	282	111	3.9	1.5	867	179	11.9	2.4	400	133	5.5	1.8	2392	271	32.8	3.3	1934	269	26.5	3.4	880	138	12.1
0500000US51073	51073	Gloucester County, Virginia	14511	293	14511	(X)	10195	392	70.3	2.5	3781	297	26.1	2	8386	420	57.8	2.7	2942	322	20.3	2.2	521	152	3.6	1	291	113	2	0.8	1288	208	8.9	1.5	548	121	3.8	0.8	4316	388	29.7	2.5	3654	386	25.2	2.5	1597	247	11
0500000US51075	51075	Goochland County, Virginia	8177	240	8177	(X)	6310	266	77.2	3.1	1834	176	22.4	2	5525	274	67.6	3.2	1545	193	18.9	2.3	240	109	2.9	1.3	76	70	0.9	0.9	545	151	6.7	1.8	213	77	2.6	0.9	1867	274	22.8	3.1	1663	245	20.3	2.8	601	155	7.3
0500000US51077	51077	Grayson County, Virginia	6710	224	6710	(X)	4223	200	62.9	2.7	1335	156	19.9	2.1	3233	176	48.2	2.7	839	114	12.5	1.6	304	91	4.5	1.3	132	64	2	0.9	686	155	10.2	2.3	364	118	5.4	1.7	2487	216	37.1	2.7	2238	206	33.4	2.7	1064	122	15.9
0500000US51079	51079	Greene County, Virginia	7107	210	7107	(X)	5092	270	71.6	3.5	1999	220	28.1	3.1	4045	336	56.9	4.6	1527	212	21.5	3	295	126	4.2	1.8	120	78	1.7	1.1	752	189	10.6	2.6	352	145	5	2	2015	269	28.4	3.5	1518	220	21.4	2.9	403	133	5.7
0500000US51081	51081	Greensville County, Virginia	3705	157	3705	(X)	2555	203	69	4.3	940	169	25.4	4.2	1760	180	47.5	4.6	597	153	16.1	4	269	124	7.3	3.3	55	45	1.5	1.2	526	130	14.2	3.4	288	90	7.8	2.4	1150	161	31	4.3	1030	156	27.8	4.2	480	96	13
0500000US51083	51083	Halifax County, Virginia	14264	377	14264	(X)	9349	381	65.5	2.1	3288	280	23.1	1.7	6653	387	46.6	2.5	2141	246	15	1.6	715	158	5	1.1	273	115	1.9	0.8	1981	243	13.9	1.7	874	186	6.1	1.3	4915	327	34.5	2.1	4436	308	31.1	2	2439	232	17.1
0500000US51085	51085	Hanover County, Virginia	37724	412	37724	(X)	28398	508	75.3	1.2	11844	427	31.4	1.1	23415	542	62.1	1.4	9612	427	25.5	1.1	1314	224	3.5	0.6	554	153	1.5	0.4	3669	329	9.7	0.9	1678	251	4.4	0.7	9326	502	24.7	1.2	7508	421	19.9	1.1	3563	341	9.4
0500000US51087	51087	Henrico County, Virginia	125478	888	125478	(X)	79939	1127	63.7	0.9	36242	934	28.9	0.7	56305	1032	44.9	0.8	24192	710	19.3	0.6	5402	533	4.3	0.4	2405	412	1.9	0.3	18232	909	14.5	0.7	9645	790	7.7	0.6	45539	1162	36.3	0.9	37489	1083	29.9	0.8	13908	650	11.1
0500000US51089	51089	Henry County, Virginia	22136	369	22136	(X)	14630	485	66.1	2.1	5106	379	23.1	1.6	10450	497	47.2	2.3	2993	347	13.5	1.5	953	224	4.3	1	479	177	2.2	0.8	3227	333	14.6	1.5	1634	263	7.4	1.2	7506	497	33.9	2.1	6782	499	30.6	2.1	3209	289	14.5
0500000US51091	51091	Highland County, Virginia	1121	91	1121	(X)	699	68	62.4	7.4	121	37	10.8	3.5	588	73	52.5	7.9	86	26	7.7	2.6	27	16	2.4	1.5	7	8	0.6	0.7	84	39	7.5	3.4	28	28	2.5	2.5	422	108	37.6	7.4	368	106	32.8	7.7	229	66	20.4
0500000US51093	51093	Isle of Wight County, Virginia	13902	282	13902	(X)	10115	347	72.8	2.2	3798	271	27.3	1.9	8150	337	58.6	2.1	2798	211	20.1	1.5	600	141	4.3	1	269	105	1.9	0.8	1365	183	9.8	1.3	731	181	5.3	1.3	3787	317	27.2	2.2	3107	325	22.3	2.3	1438	187	10.3
0500000US51095	51095	James City County, Virginia	28352	517	28352	(X)	20103	523	70.9	1.8	6903	346	24.3	1.2	16405	512	57.9	1.8	5164	362	18.2	1.3	972	238	3.4	0.8	417	172	1.5	0.6	2726	363	9.6	1.3	1322	272	4.7	1	8249	574	29.1	1.8	6844	559	24.1	1.8	3430	382	12.1
0500000US51097	51097	King and Queen County, Virginia	2807	146	2807	(X)	1823	184	64.9	6	501	108	17.8	3.8	1399	172	49.8	5.9	365	107	13	3.8	122	62	4.3	2.2	0	17	0	1.1	302	98	10.8	3.4	136	66	4.8	2.4	984	184	35.1	6	820	178	29.2	5.9	432	110	15.4
0500000US51099	51099	King George County, Virginia	8669	240	8669	(X)	6369	277	73.5	3.1	2657	260	30.6	3	5125	317	59.1	3.6	2075	221	23.9	2.6	409	133	4.7	1.5	196	120	2.3	1.4	835	185	9.6	2.1	386	122	4.5	1.4	2300	294	26.5	3.1	1866	254	21.5	2.8	660	145	7.6
0500000US51101	51101	King William County, Virginia	6066	166	6066	(X)	4729	196	78	3.1	2099	154	34.6	2.6	3777	210	62.3	3.8	1642	177	27.1	3.1	209	92	3.4	1.5	171	84	2.8	1.4	743	166	12.2	2.7	286	113	4.7	1.8	1337	204	22	3.1	1158	181	19.1	2.8	457	108	7.5
0500000US51103	51103	Lancaster County, Virginia	5097	279	5097	(X)	3017	262	59.2	4	646	140	12.7	2.4	2380	232	46.7	3.9	425	117	8.3	2.1	190	96	3.7	1.9	99	68	1.9	1.3	447	93	8.8	1.8	122	57	2.4	1.1	2080	236	40.8	4	1877	229	36.8	4.3	1191	166	23.4
0500000US51105	51105	Lee County, Virginia	9282	358	9282	(X)	6251	401	67.3	3.2	2202	202	23.7	1.8	4775	357	51.4	3.1	1572	190	16.9	1.9	496	127	5.3	1.3	284	101	3.1	1.1	980	169	10.6	1.8	346	100	3.7	1	3031	305	32.7	3.2	2704	306	29.1	3.2	1478	220	15.9
0500000US51107	51107	Loudoun County, Virginia	117073	667	117073	(X)	91442	946	78.1	0.7	54126	945	46.2	0.8	76715	1117	65.5	0.9	46022	969	39.3	0.8	4390	427	3.7	0.4	2129	317	1.8	0.3	10337	688	8.8	0.6	5975	496	5.1	0.4	25631	891	21.9	0.7	20012	748	17.1	0.6	5680	361	4.9
0500000US51109	51109	Louisa County, Virginia	13146	415	13146	(X)	9459	404	72	2.6	3372	310	25.7	2.1	7546	455	57.4	3.1	2416	276	18.4	1.9	627	167	4.8	1.3	293	134	2.2	1	1286	232	9.8	1.7	663	171	5	1.3	3687	388	28	2.6	2964	374	22.5	2.6	1408	217	10.7
0500000US51111	51111	Lunenburg County, Virginia	4670	190	4670	(X)	3195	189	68.4	3.5	1023	143	21.9	2.7	2170	182	46.5	3.8	590	129	12.6	2.6	331	103	7.1	2.1	155	84	3.3	1.7	694	133	14.9	2.9	278	93	6	2	1475	183	31.6	3.5	1319	188	28.2	3.7	621	125	13.3
0500000US51113	51113	Madison County, Virginia	5042	211	5042	(X)	3553	225	70.5	4.3	1164	173	23.1	3.2	2718	244	53.9	4.7	813	170	16.1	3.2	192	85	3.8	1.7	78	51	1.5	1	643	152	12.8	3	273	99	5.4	2	1489	244	29.5	4.3	1265	239	25.1	4.3	543	153	10.8
0500000US51115	51115	Mathews County, Virginia	3837	266	3837	(X)	2710	271	70.6	5.5	724	139	18.9	3.2	2308	269	60.2	5.7	515	159	13.4	3.9	118	81	3.1	2.1	65	72	1.7	1.9	284	117	7.4	3	144	76	3.8	2	1127	233	29.4	5.5	971	237	25.3	5.7	618	185	16.1
0500000US51117	51117	Mecklenburg County, Virginia	12066	426	12066	(X)	7674	373	63.6	2.2	2314	268	19.2	2	5426	303	45	2.2	1402	195	11.6	1.5	497	119	4.1	1	114	61	0.9	0.5	1751	215	14.5	1.7	798	184	6.6	1.5	4392	315	36.4	2.2	3977	307	33	2.3	2068	221	17.1
0500000US51119	51119	Middlesex County, Virginia	4474	266	4474	(X)	3007	243	67.2	3.7	768	148	17.2	3.1	2334	239	52.2	4.6	540	138	12.1	3	249	130	5.6	2.8	82	79	1.8	1.8	424	115	9.5	2.6	146	70	3.3	1.6	1467	189	32.8	3.7	1287	175	28.8	3.6	790	124	17.7
0500000US51121	51121	Montgomery County, Virginia	35701	559	35701	(X)	19406	569	54.4	1.6	8215	445	23	1.2	15573	532	43.6	1.5	6034	376	16.9	1	1474	316	4.1	0.9	832	289	2.3	0.8	2359	338	6.6	1	1349	272	3.8	0.8	16295	676	45.6	1.6	9805	669	27.5	1.8	2625	280	7.4
0500000US51125	51125	Nelson County, Virginia	6378	318	6378	(X)	4084	280	64	4.4	1340	168	21	2.4	2833	290	44.4	4.9	633	132	9.9	2.1	295	101	4.6	1.6	118	65	1.9	1	956	231	15	3.5	589	170	9.2	2.6	2294	339	36	4.4	1795	312	28.1	4.3	943	221	14.8
0500000US51127	51127	New Kent County, Virginia	7537	159	7537	(X)	5754	307	76.3	4	2016	261	26.7	3.4	4764	288	63.2	3.8	1628	244	21.6	3.2	190	91	2.5	1.2	15	24	0.2	0.3	800	189	10.6	2.5	373	150	4.9	2	1783	306	23.7	4	1545	281	20.5	3.6	822	194	10.9
0500000US51131	51131	Northampton County, Virginia	5075	244	5075	(X)	3137	225	61.8	3.8	997	145	19.6	2.7	2056	209	40.5	4	512	111	10.1	2.1	163	63	3.2	1.3	73	47	1.4	0.9	918	166	18.1	3	412	102	8.1	1.9	1938	225	38.2	3.8	1636	205	32.2	3.7	847	125	16.7
0500000US51133	51133	Northumberland County, Virginia	5776	327	5776	(X)	3943	328	68.3	3.9	1011	248	17.5	3.8	3256	297	56.4	3.8	758	206	13.1	3.2	182	89	3.2	1.5	93	62	1.6	1.1	505	147	8.7	2.5	160	94	2.8	1.6	1833	245	31.7	3.9	1607	229	27.8	3.8	950	198	16.4
0500000US51135	51135	Nottoway County, Virginia	5676	263	5676	(X)	3654	308	64.4	4.6	1328	205	23.4	3.1	2327	307	41	4.8	774	196	13.6	3.2	281	111	5	2	127	79	2.2	1.4	1046	214	18.4	3.8	427	132	7.5	2.3	2022	278	35.6	4.6	1874	266	33	4.4	947	163	16.7
0500000US51137	51137	Orange County, Virginia	13245	298	13245	(X)	9570	383	72.3	2.7	3830	318	28.9	2.2	7249	456	54.7	3.3	2318	330	17.5	2.4	784	274	5.9	2.1	637	240	4.8	1.8	1537	264	11.6	2	875	203	6.6	1.5	3675	373	27.7	2.7	3258	345	24.6	2.4	1529	206	11.5
0500000US51139	51139	Page County, Virginia	9523	269	9523	(X)	6584	328	69.1	2.8	2267	240	23.8	2.3	4818	306	50.6	3.1	1369	180	14.4	1.8	621	210	6.5	2.2	390	144	4.1	1.5	1145	209	12	2.1	508	149	5.3	1.5	2939	281	30.9	2.8	2263	281	23.8	2.8	1108	178	11.6
0500000US51141	51141	Patrick County, Virginia	7805	324	7805	(X)	5150	319	66	3	1688	186	21.6	2.2	4153	316	53.2	3.5	1168	176	15	2.3	221	93	2.8	1.2	109	67	1.4	0.8	776	210	9.9	2.6	411	156	5.3	2	2655	261	34	3	2354	267	30.2	3.3	1245	191	16
0500000US51143	51143	Pittsylvania County, Virginia	26327	499	26327	(X)	18195	536	69.1	1.8	6472	387	24.6	1.3	13781	517	52.3	2	4326	325	16.4	1.2	848	158	3.2	0.6	399	101	1.5	0.4	3566	358	13.5	1.3	1747	256	6.6	0.9	8132	516	30.9	1.8	7400	507	28.1	1.8	3269	303	12.4
0500000US51145	51145	Powhatan County, Virginia	9866	228	9866	(X)	7770	253	78.8	2.5	2957	212	30	2.1	6485	266	65.7	2.8	2375	216	24.1	2.2	395	130	4	1.3	182	99	1.8	1	890	167	9	1.7	400	137	4.1	1.4	2096	269	21.2	2.5	1790	243	18.1	2.3	876	170	8.9
0500000US51147	51147	Prince Edward County, Virginia	7294	406	7294	(X)	4621	324	63.4	3.6	1704	278	23.4	3.3	3213	284	44	4.1	1009	201	13.8	2.6	414	154	5.7	2	189	119	2.6	1.6	994	199	13.6	2.5	506	193	6.9	2.6	2673	329	36.6	3.6	2131	267	29.2	3.6	1059	178	14.5
0500000US51149	51149	Prince George County, Virginia	11191	315	11191	(X)	8652	348	77.3	2.3	3668	308	32.8	2.4	6841	321	61.1	2.6	2634	266	23.5	2.2	567	206	5.1	1.8	379	193	3.4	1.7	1244	210	11.1	1.8	655	166	5.9	1.5	2539	272	22.7	2.3	2196	268	19.6	2.3	905	160	8.1
0500000US51153	51153	Prince William County, Virginia	138102	709	138102	(X)	106561	909	77.2	0.6	58062	965	42	0.7	83377	1177	60.4	0.8	45287	901	32.8	0.7	7378	684	5.3	0.5	3812	476	2.8	0.3	15806	767	11.4	0.6	8963	686	6.5	0.5	31541	804	22.8	0.6	25471	740	18.4	0.5	6472	420	4.7
0500000US51155	51155	Pulaski County, Virginia	14553	388	14553	(X)	9923	411	68.2	2.5	3088	282	21.2	1.9	7514	360	51.6	2.5	2026	203	13.9	1.4	713	195	4.9	1.3	256	108	1.8	0.7	1696	271	11.7	1.8	806	199	5.5	1.3	4630	408	31.8	2.5	3953	365	27.2	2.3	1769	239	12.2
0500000US51157	51157	Rappahannock County, Virginia	3247	154	3247	(X)	2255	141	69.4	3.4	661	101	20.4	2.9	1910	160	58.8	4.4	512	101	15.8	3.1	160	61	4.9	1.8	81	50	2.5	1.5	185	71	5.7	2.2	68	53	2.1	1.6	992	125	30.6	3.4	863	113	26.6	3.2	335	92	10.3
0500000US51159	51159	Richmond County, Virginia	3084	213	3084	(X)	2124	209	68.9	4.9	714	153	23.2	4.2	1574	180	51	5.3	513	119	16.6	3.4	87	51	2.8	1.6	36	47	1.2	1.5	463	138	15	4.1	165	102	5.4	3.2	960	164	31.1	4.9	784	160	25.4	5.2	440	113	14.3
0500000US51161	51161	Roanoke County, Virginia	38322	387	38322	(X)	25889	631	67.6	1.4	10089	496	26.3	1.2	20105	594	52.5	1.5	7278	400	19	1	1694	317	4.4	0.8	945	248	2.5	0.6	4090	385	10.7	1	1866	293	4.9	0.8	12433	520	32.4	1.4	10791	518	28.2	1.4	4865	424	12.7
0500000US51163	51163	Rockbridge County, Virginia	9277	270	9277	(X)	6166	361	66.5	3.7	1924	236	20.7	2.5	5036	376	54.3	3.9	1456	245	15.7	2.6	373	158	4	1.7	214	142	2.3	1.5	757	149	8.2	1.6	254	97	2.7	1	3111	368	33.5	3.7	2507	326	27	3.3	1320	191	14.2
0500000US51165	51165	Rockingham County, Virginia	29883	374	29883	(X)	21359	550	71.5	1.6	8099	370	27.1	1.2	17304	515	57.9	1.6	6297	287	21.1	0.9	1221	194	4.1	0.7	434	119	1.5	0.4	2834	279	9.5	0.9	1368	242	4.6	0.8	8524	486	28.5	1.6	6989	421	23.4	1.4	3351	278	11.2
0500000US51167	51167	Russell County, Virginia	10937	369	10937	(X)	7049	361	64.5	3	2067	205	18.9	1.8	5734	375	52.4	3.3	1517	196	13.9	1.8	359	120	3.3	1.1	132	65	1.2	0.6	956	192	8.7	1.8	418	131	3.8	1.2	3888	384	35.5	3	3585	375	32.8	3	1788	250	16.3
0500000US51169	51169	Scott County, Virginia	9104	265	9104	(X)	6343	255	69.7	2.2	1905	157	20.9	1.6	5066	268	55.6	2.6	1452	143	15.9	1.5	415	108	4.6	1.2	91	44	1	0.5	862	161	9.5	1.7	362	102	4	1.1	2761	223	30.3	2.2	2535	216	27.8	2.2	1268	173	13.9
0500000US51171	51171	Shenandoah County, Virginia	17222	389	17222	(X)	11680	401	67.8	2	4214	333	24.5	1.8	9317	394	54.1	2.1	2909	260	16.9	1.5	680	187	3.9	1.1	353	165	2	0.9	1683	229	9.8	1.3	952	207	5.5	1.2	5542	389	32.2	2	4832	388	28.1	2	2320	219	13.5
0500000US51173	51173	Smyth County, Virginia	12930	305	12930	(X)	8671	328	67.1	2.1	3177	192	24.6	1.3	6473	336	50.1	2.5	2102	183	16.3	1.4	692	148	5.4	1.1	325	107	2.5	0.8	1506	188	11.6	1.4	750	164	5.8	1.2	4259	299	32.9	2.1	3737	285	28.9	2	1533	185	11.9
0500000US51175	51175	Southampton County, Virginia	6727	186	6727	(X)	4940	211	73.4	2.9	2117	156	31.5	2.4	3620	218	53.8	3.2	1216	157	18.1	2.4	189	78	2.8	1.2	128	70	1.9	1	1131	171	16.8	2.5	773	165	11.5	2.4	1787	210	26.6	2.9	1546	195	23	2.7	641	126	9.5
0500000US51177	51177	Spotsylvania County, Virginia	43105	401	43105	(X)	33196	559	77	1.1	15092	468	35	1	26268	643	60.9	1.4	11464	465	26.6	1.1	1812	273	4.2	0.6	798	176	1.9	0.4	5116	404	11.9	0.9	2830	312	6.6	0.7	9909	505	23	1.1	7991	422	18.5	0.9	3169	267	7.4
0500000US51179	51179	Stafford County, Virginia	44311	498	44311	(X)	35967	590	81.2	1.1	18104	580	40.9	1.2	28966	651	65.4	1.4	13851	496	31.3	1	1829	331	4.1	0.7	1098	266	2.5	0.6	5172	441	11.7	1	3155	406	7.1	0.9	8344	534	18.8	1.1	6648	527	15	1.2	2065	281	4.7
0500000US51181	51181	Surry County, Virginia	2707	126	2707	(X)	2025	141	74.8	4.7	682	113	25.2	3.8	1493	125	55.2	4.5	450	102	16.6	3.8	111	56	4.1	2	58	43	2.1	1.6	421	110	15.6	4	174	69	6.4	2.4	682	137	25.2	4.7	541	126	20	4.4	207	79	7.6
0500000US51183	51183	Sussex County, Virginia	3793	576	3793	(X)	2429	402	64	4.8	919	276	24.2	4.2	1536	233	40.5	4	445	129	11.7	2.3	143	95	3.8	2.1	59	63	1.6	1.5	750	193	19.8	3.9	415	156	10.9	3.1	1364	290	36	4.8	1204	235	31.7	4.4	522	109	13.8
0500000US51185	51185	Tazewell County, Virginia	17595	390	17595	(X)	12004	474	68.2	2.3	4028	341	22.9	1.8	9364	487	53.2	2.5	3224	310	18.3	1.6	825	166	4.7	0.9	311	107	1.8	0.6	1815	300	10.3	1.7	493	135	2.8	0.8	5591	422	31.8	2.3	4975	393	28.3	2.1	2502	278	14.2
0500000US51187	51187	Warren County, Virginia	14174	283	14174	(X)	10239	353	72.2	2.1	4146	302	29.3	2.1	7501	367	52.9	2.4	2770	258	19.5	1.8	776	190	5.5	1.3	287	145	2	1	1962	268	13.8	1.9	1089	195	7.7	1.4	3935	311	27.8	2.1	3215	332	22.7	2.2	1288	189	9.1
0500000US51191	51191	Washington County, Virginia	22512	368	22512	(X)	14871	459	66.1	1.9	5196	296	23.1	1.3	11699	494	52	2.2	3837	286	17	1.2	774	153	3.4	0.7	238	85	1.1	0.4	2398	302	10.7	1.3	1121	225	5	1	7641	469	33.9	1.9	6800	453	30.2	1.9	2957	323	13.1
0500000US51193	51193	Westmoreland County, Virginia	7124	345	7124	(X)	4427	341	62.1	3.9	1248	188	17.5	2.5	3535	326	49.6	4.4	878	181	12.3	2.5	215	100	3	1.4	111	84	1.6	1.2	677	177	9.5	2.3	259	123	3.6	1.7	2697	312	37.9	3.9	2208	300	31	3.9	972	195	13.6
0500000US51195	51195	Wise County, Virginia	15225	339	15225	(X)	10265	381	67.4	2.2	3996	312	26.2	1.8	7397	381	48.6	2.4	2639	235	17.3	1.5	569	158	3.7	1	150	72	1	0.5	2299	290	15.1	1.9	1207	235	7.9	1.5	4960	359	32.6	2.2	4248	333	27.9	2.1	1930	217	12.7
0500000US51197	51197	Wythe County, Virginia	12039	364	12039	(X)	7951	388	66	2.5	2825	300	23.5	2.3	6447	375	53.6	2.7	1996	223	16.6	1.7	502	151	4.2	1.2	315	140	2.6	1.2	1002	213	8.3	1.7	514	179	4.3	1.5	4088	326	34	2.5	3591	324	29.8	2.6	1759	212	14.6
0500000US51199	51199	York County, Virginia	23872	411	23872	(X)	18721	462	78.4	1.7	8284	362	34.7	1.4	15362	476	64.4	1.9	6399	407	26.8	1.6	708	183	3	0.8	362	142	1.5	0.6	2651	306	11.1	1.3	1523	253	6.4	1.1	5151	431	21.6	1.7	4166	387	17.5	1.5	1850	207	7.7
0500000US51510	51510	Alexandria city, Virginia	68063	685	68063	(X)	33043	861	48.5	1.2	14591	605	21.4	0.8	24538	803	36.1	1.1	10292	495	15.1	0.7	2657	330	3.9	0.5	1062	211	1.6	0.3	5848	535	8.6	0.8	3237	419	4.8	0.6	35020	908	51.5	1.2	28288	952	41.6	1.3	5307	303	7.8
0500000US51520	51520	Bristol city, Virginia	7671	249	7671	(X)	4855	320	63.3	4	2070	281	27	3.6	3332	265	43.4	3.6	1085	181	14.1	2.4	279	109	3.6	1.4	157	76	2	1	1244	269	16.2	3.4	828	243	10.8	3.1	2816	334	36.7	4	2477	321	32.3	3.9	1332	196	17.4
0500000US51530	51530	Buena Vista city, Virginia	2709	126	2709	(X)	1779	188	65.7	6.7	854	161	31.5	5.7	1270	193	46.9	7	586	155	21.6	5.7	210	109	7.8	4	166	107	6.1	3.9	299	149	11	5.5	102	67	3.8	2.5	930	194	34.3	6.7	794	188	29.3	6.6	336	103	12.4
0500000US51540	51540	Charlottesville city, Virginia	17980	313	17980	(X)	8391	407	46.7	2.2	3982	299	22.1	1.7	5813	328	32.3	1.8	2490	214	13.8	1.2	633	217	3.5	1.2	359	159	2	0.9	1945	291	10.8	1.6	1133	231	6.3	1.3	9589	447	53.3	2.2	6186	428	34.4	2.3	1431	187	8
0500000US51550	51550	Chesapeake city, Virginia	82573	645	82573	(X)	61678	1073	74.7	1.2	26847	818	32.5	0.9	45114	1045	54.6	1.2	18266	732	22.1	0.9	4063	465	4.9	0.6	1844	377	2.2	0.5	12501	707	15.1	0.9	6737	565	8.2	0.7	20895	971	25.3	1.2	17451	905	21.1	1.1	6273	522	7.6
0500000US51570	51570	Colonial Heights city, Virginia	7206	186	7206	(X)	4583	267	63.6	3.3	1939	200	26.9	2.7	3130	233	43.4	3.2	1122	157	15.6	2.2	322	114	4.5	1.5	165	97	2.3	1.3	1131	165	15.7	2.3	652	147	9	2	2623	249	36.4	3.3	2259	242	31.3	3.3	1118	151	15.5
0500000US51580	51580	Covington city, Virginia	2472	149	2472	(X)	1452	162	58.7	5.7	624	121	25.2	4.3	980	131	39.6	5.5	387	98	15.7	3.9	114	67	4.6	2.6	44	38	1.8	1.5	358	133	14.5	5.2	193	101	7.8	3.9	1020	156	41.3	5.7	902	156	36.5	5.8	352	89	14.2
0500000US51590	51590	Danville city, Virginia	18653	402	18653	(X)	10824	352	58	1.8	4052	277	21.7	1.4	6223	385	33.4	2.1	1796	271	9.6	1.5	894	194	4.8	1	318	128	1.7	0.7	3707	271	19.9	1.4	1938	252	10.4	1.3	7829	427	42	1.8	6923	421	37.1	1.9	2876	230	15.4
0500000US51595	51595	Emporia city, Virginia	2210	156	2210	(X)	1448	114	65.5	5.6	687	123	31.1	5.2	712	112	32.2	5.3	246	90	11.1	4.3	124	74	5.6	3.4	10	17	0.5	0.8	612	103	27.7	4.2	431	119	19.5	4.9	762	157	34.5	5.6	715	150	32.4	5.4	348	86	15.7
0500000US51600	51600	Fairfax city, Virginia	8476	134	8476	(X)	5937	232	70	2.6	2337	191	27.6	2.2	4684	248	55.3	2.9	1889	185	22.3	2.2	407	102	4.8	1.2	176	81	2.1	1	846	186	10	2.2	272	99	3.2	1.2	2539	224	30	2.6	1680	215	19.8	2.5	674	125	8
0500000US51610	51610	Falls Church city, Virginia	5301	129	5301	(X)	3266	228	61.6	4.2	1598	134	30.1	2.5	2634	209	49.7	3.9	1262	126	23.8	2.4	113	57	2.1	1.1	27	28	0.5	0.5	519	196	9.8	3.7	309	108	5.8	2	2035	237	38.4	4.2	1758	236	33.2	4.3	557	170	10.5
0500000US51620	51620	Franklin city, Virginia	3424	154	3424	(X)	2202	241	64.3	6.5	863	209	25.2	5.6	1207	206	35.3	5.8	377	154	11	4.3	107	73	3.1	2.1	0	17	0	0.9	888	184	25.9	5.3	486	158	14.2	4.5	1222	234	35.7	6.5	1144	229	33.4	6.5	529	119	15.4
0500000US51630	51630	Fredericksburg city, Virginia	10271	359	10271	(X)	5491	369	53.5	3.2	2786	323	27.1	3.1	3342	352	32.5	3.2	1423	228	13.9	2.1	244	89	2.4	0.9	62	40	0.6	0.4	1905	349	18.5	3.4	1301	283	12.7	2.8	4780	385	46.5	3.2	3865	349	37.6	3.2	1038	180	10.1
0500000US51640	51640	Galax city, Virginia	2767	209	2767	(X)	1736	140	62.7	5.6	701	136	25.3	5.3	1085	137	39.2	4.5	399	95	14.4	3.5	228	99	8.2	3.7	127	84	4.6	3.2	423	120	15.3	4.5	175	104	6.3	3.8	1031	206	37.3	5.6	965	198	34.9	5.5	493	128	17.8
0500000US51650	51650	Hampton city, Virginia	53656	713	53656	(X)	32733	707	61	1.2	13507	594	25.2	1.1	20342	702	37.9	1.3	6854	504	12.8	0.9	2394	370	4.5	0.7	993	228	1.9	0.4	9997	624	18.6	1.2	5660	519	10.5	1	20923	783	39	1.2	16996	697	31.7	1.2	5670	428	10.6
0500000US51660	51660	Harrisonburg city, Virginia	16626	277	16626	(X)	8526	314	51.3	2	4447	271	26.7	1.6	5605	333	33.7	2.1	2458	279	14.8	1.7	947	240	5.7	1.4	723	207	4.3	1.2	1974	256	11.9	1.5	1266	230	7.6	1.4	8100	393	48.7	2	4807	374	28.9	2.1	1447	188	8.7
0500000US51670	51670	Hopewell city, Virginia	8866	285	8866	(X)	5490	297	61.9	3	2548	263	28.7	3	2894	283	32.6	3.3	1081	204	12.2	2.3	647	181	7.3	2	289	142	3.3	1.6	1949	288	22	3.2	1178	240	13.3	2.7	3376	301	38.1	3	2894	295	32.6	3.2	1215	179	13.7
0500000US51678	51678	Lexington city, Virginia	1856	232	1856	(X)	793	125	42.7	6.1	249	69	13.4	3.3	630	125	33.9	6.4	158	50	8.5	2.6	8	14	0.4	0.8	0	17	0	1.7	155	74	8.4	4	91	52	4.9	2.7	1063	201	57.3	6.1	913	191	49.2	7	509	132	27.4
0500000US51680	51680	Lynchburg city, Virginia	28282	520	28282	(X)	16290	539	57.6	2	7300	434	25.8	1.5	10536	415	37.3	1.6	4065	306	14.4	1.1	1121	264	4	0.9	495	195	1.8	0.7	4633	463	16.4	1.6	2740	347	9.7	1.2	11992	663	42.4	2	9328	541	33	1.7	3566	277	12.6
0500000US51683	51683	Manassas city, Virginia	12430	232	12430	(X)	9476	322	76.2	2.2	4548	298	36.6	2.3	7477	388	60.2	3	3412	279	27.4	2.2	528	164	4.2	1.3	212	100	1.7	0.8	1471	290	11.8	2.3	924	251	7.4	2	2954	284	23.8	2.2	2394	256	19.3	2	723	103	5.8
0500000US51685	51685	Manassas Park city, Virginia	4730	114	4730	(X)	3420	207	72.3	4.2	1921	211	40.6	4.3	2655	277	56.1	5.7	1433	233	30.3	4.8	204	84	4.3	1.8	103	48	2.2	1	561	165	11.9	3.5	385	125	8.1	2.7	1310	203	27.7	4.2	985	198	20.8	4.1	296	101	6.3
0500000US51690	51690	Martinsville city, Virginia	5787	220	5787	(X)	3336	235	57.6	3.7	1269	169	21.9	2.7	2055	208	35.5	3.3	570	129	9.8	2.1	146	66	2.5	1.1	77	46	1.3	0.8	1135	153	19.6	2.7	622	150	10.7	2.6	2451	244	42.4	3.7	2174	248	37.6	3.9	932	149	16.1
0500000US51700	51700	Newport News city, Virginia	69247	810	69247	(X)	42383	835	61.2	1.2	19077	671	27.5	1	26372	831	38.1	1.3	10197	559	14.7	0.8	3636	474	5.3	0.7	1615	305	2.3	0.4	12375	823	17.9	1.2	7265	674	10.5	1	26864	948	38.8	1.2	22409	842	32.4	1.1	6273	413	9.1
0500000US51710	51710	Norfolk city, Virginia	87367	988	87367	(X)	50685	889	58	0.9	24016	741	27.5	0.8	30479	786	34.9	0.8	12578	629	14.4	0.7	4428	459	5.1	0.5	2084	286	2.4	0.3	15778	532	18.1	0.6	9354	458	10.7	0.5	36682	893	42	0.9	28617	781	32.8	0.8	8146	412	9.3
0500000US51720	51720	Norton city, Virginia	1858	148	1858	(X)	940	101	50.6	6.5	435	107	23.4	6.1	564	121	30.4	6.5	236	82	12.7	4.4	144	70	7.8	3.9	56	59	3	3.2	232	102	12.5	5.6	143	86	7.7	4.7	918	171	49.4	6.5	803	190	43.2	7.6	339	129	18.2
0500000US51730	51730	Petersburg city, Virginia	13175	326	13175	(X)	7311	383	55.5	2.4	2816	319	21.4	2.3	3483	276	26.4	2	884	184	6.7	1.4	534	119	4.1	0.9	249	113	1.9	0.9	3294	310	25	2.2	1683	228	12.8	1.6	5864	335	44.5	2.4	4974	333	37.8	2.5	1719	155	13
0500000US51735	51735	Poquoson city, Virginia	4610	110	4610	(X)	3318	178	72	3.8	1352	153	29.3	3.2	2792	180	60.6	4	1051	129	22.8	2.8	93	52	2	1.1	43	33	0.9	0.7	433	142	9.4	3	258	121	5.6	2.6	1292	186	28	3.8	1073	175	23.3	3.7	495	113	10.7
0500000US51740	51740	Portsmouth city, Virginia	36840	537	36840	(X)	23009	681	62.5	1.7	9777	504	26.5	1.3	12841	620	34.9	1.6	4337	397	11.8	1.1	2167	353	5.9	1	949	219	2.6	0.6	8001	533	21.7	1.4	4491	455	12.2	1.2	13831	656	37.5	1.7	11636	601	31.6	1.5	4098	322	11.1
0500000US51750	51750	Radford city, Virginia	5604	328	5604	(X)	2449	237	43.7	3.9	1035	198	18.5	3.4	1692	229	30.2	3.7	627	203	11.2	3.5	155	95	2.8	1.7	73	69	1.3	1.2	602	181	10.7	3.3	335	142	6	2.6	3155	313	56.3	3.9	1830	248	32.7	4.7	584	124	10.4
0500000US51760	51760	Richmond city, Virginia	88958	800	88958	(X)	40638	801	45.7	0.9	17736	544	19.9	0.6	21175	730	23.8	0.8	7621	400	8.6	0.4	3575	410	4	0.5	1441	260	1.6	0.3	15888	680	17.9	0.7	8674	556	9.8	0.6	48320	926	54.3	0.9	37857	919	42.6	1	9916	534	11.1
0500000US51770	51770	Roanoke city, Virginia	42541	579	42541	(X)	23628	658	55.5	1.5	9939	564	23.4	1.3	14202	668	33.4	1.6	4754	486	11.2	1.1	2212	349	5.2	0.8	1004	257	2.4	0.6	7214	566	17	1.3	4181	473	9.8	1.1	18913	730	44.5	1.5	15655	721	36.8	1.6	5001	341	11.8
0500000US51775	51775	Salem city, Virginia	10060	239	10060	(X)	6244	270	62.1	2.6	2613	208	26	2	4474	270	44.5	2.9	1533	192	15.2	2	377	116	3.7	1.1	242	98	2.4	1	1393	209	13.8	2	838	163	8.3	1.6	3816	297	37.9	2.6	3263	317	32.4	3	1381	197	13.7
0500000US51790	51790	Staunton city, Virginia	10383	314	10383	(X)	5842	265	56.3	2.6	2211	239	21.3	2.2	4227	289	40.7	3	1262	194	12.2	1.9	388	135	3.7	1.3	216	118	2.1	1.1	1227	209	11.8	2	733	196	7.1	1.8	4541	346	43.7	2.6	3845	322	37	2.7	1726	208	16.6
0500000US51800	51800	Suffolk city, Virginia	31741	396	31741	(X)	23470	511	73.9	1.4	10491	409	33.1	1.2	16525	526	52.1	1.5	6793	377	21.4	1.1	1411	240	4.4	0.8	621	181	2	0.6	5534	407	17.4	1.3	3077	333	9.7	1.1	8271	461	26.1	1.4	6889	383	21.7	1.2	2657	229	8.4
0500000US51810	51810	Virginia Beach city, Virginia	167509	1094	167509	(X)	115381	1158	68.9	0.6	52523	1053	31.4	0.6	83975	1125	50.1	0.7	34929	866	20.9	0.5	7517	678	4.5	0.4	3974	542	2.4	0.3	23889	875	14.3	0.5	13620	672	8.1	0.4	52128	1129	31.1	0.6	41017	1218	24.5	0.7	14919	603	8.9
0500000US51820	51820	Waynesboro city, Virginia	9044	252	9044	(X)	5497	296	60.8	3.3	2392	287	26.4	3.2	3580	293	39.6	3.2	1170	223	12.9	2.5	582	193	6.4	2.2	373	163	4.1	1.8	1335	241	14.8	2.6	849	260	9.4	2.9	3547	338	39.2	3.3	3059	305	33.8	3.1	1412	200	15.6
0500000US51830	51830	Williamsburg city, Virginia	4627	205	4627	(X)	2161	163	46.7	3.5	778	123	16.8	2.7	1737	169	37.5	3.6	529	105	11.4	2.3	108	57	2.3	1.2	60	38	1.3	0.8	316	82	6.8	1.8	189	74	4.1	1.6	2466	220	53.3	3.5	1929	186	41.7	3.8	657	135	14.2
0500000US51840	51840	Winchester city, Virginia	10596	323	10596	(X)	6181	377	58.3	3	2803	272	26.5	2.4	4157	364	39.2	3.3	1729	250	16.3	2.3	603	170	5.7	1.6	351	161	3.3	1.5	1421	260	13.4	2.3	723	200	6.8	1.8	4415	332	41.7	3	3621	321	34.2	3	1364	190	12.9
0500000US54001	54001	Barbour County, West Virginia	6169	259	6169	(X)	4178	261	67.7	3.1	1471	168	23.8	2.3	3328	256	53.9	3.5	976	153	15.8	2.3	192	74	3.1	1.2	132	61	2.1	1	658	131	10.7	2	363	102	5.9	1.6	1991	210	32.3	3.1	1553	184	25.2	2.9	653	104	10.6
0500000US54003	54003	Berkeley County, West Virginia	41720	544	41720	(X)	29217	639	70	1.5	12504	601	30	1.5	21445	712	51.4	1.6	8030	540	19.2	1.3	2536	473	6.1	1.1	1422	348	3.4	0.8	5236	511	12.6	1.2	3052	434	7.3	1.1	12503	669	30	1.5	10215	612	24.5	1.4	3324	376	8
0500000US54005	54005	Boone County, West Virginia	9466	250	9466	(X)	6593	271	69.6	2.7	2444	241	25.8	2.3	4728	299	49.9	3.1	1663	208	17.6	2.1	575	161	6.1	1.7	264	104	2.8	1.1	1290	217	13.6	2.3	517	144	5.5	1.5	2873	279	30.4	2.7	2424	267	25.6	2.6	1028	145	10.9
0500000US54007	54007	Braxton County, West Virginia	5417	244	5417	(X)	3772	285	69.6	3.9	981	146	18.1	2.4	2989	249	55.2	4.1	728	137	13.4	2.4	292	142	5.4	2.5	71	61	1.3	1.1	491	145	9.1	2.6	182	81	3.4	1.5	1645	217	30.4	3.9	1438	197	26.5	3.7	763	154	14.1
0500000US54009	54009	Brooke County, West Virginia	9934	211	9934	(X)	6271	289	63.1	2.7	2073	214	20.9	2.1	4746	267	47.8	2.8	1344	192	13.5	2	508	128	5.1	1.3	203	91	2	0.9	1017	189	10.2	1.9	526	131	5.3	1.3	3663	287	36.9	2.7	3165	274	31.9	2.6	1445	205	14.5
0500000US54011	54011	Cabell County, West Virginia	39954	550	39954	(X)	22323	640	55.9	1.7	8871	478	22.2	1.2	15981	606	40	1.6	5433	417	13.6	1	1618	286	4	0.7	780	217	2	0.5	4724	385	11.8	1	2658	310	6.7	0.8	17631	820	44.1	1.7	14343	734	35.9	1.7	5299	366	13.3
0500000US54013	54013	Calhoun County, West Virginia	2913	187	2913	(X)	1972	188	67.7	4.9	641	126	22	3.9	1634	185	56.1	5.5	475	120	16.3	3.9	110	63	3.8	2.2	42	39	1.4	1.3	228	83	7.8	2.7	124	63	4.3	2.1	941	156	32.3	4.9	768	144	26.4	4.5	412	111	14.1
0500000US54015	54015	Clay County, West Virginia	3375	173	3375	(X)	2330	182	69	3.9	801	130	23.7	3.5	1903	191	56.4	5	621	120	18.4	3.4	117	63	3.5	1.9	39	36	1.2	1	310	91	9.2	2.6	141	66	4.2	1.9	1045	142	31	3.9	774	132	22.9	3.8	358	90	10.6
0500000US54017	54017	Doddridge County, West Virginia	2625	182	2625	(X)	1679	176	64	5	402	117	15.3	4.2	1409	175	53.7	5.4	321	94	12.2	3.3	79	35	3	1.3	31	30	1.2	1.1	191	73	7.3	2.8	50	39	1.9	1.5	946	145	36	5	816	134	31.1	4.8	338	76	12.9
0500000US54019	54019	Fayette County, West Virginia	17845	393	17845	(X)	12121	474	67.9	2.2	4008	359	22.5	1.9	9011	410	50.5	2.3	2446	304	13.7	1.7	882	199	4.9	1.1	410	132	2.3	0.7	2228	291	12.5	1.6	1152	227	6.5	1.2	5724	422	32.1	2.2	5106	416	28.6	2.2	2130	258	11.9
0500000US54021	54021	Gilmer County, West Virginia	2709	147	2709	(X)	1743	122	64.3	4.2	609	96	22.5	3.2	1446	135	53.4	4.6	451	95	16.6	3.2	109	52	4	1.9	42	30	1.6	1.1	188	60	6.9	2.2	116	49	4.3	1.8	966	138	35.7	4.2	741	119	27.4	4.2	298	72	11
0500000US54023	54023	Grant County, West Virginia	4158	198	4158	(X)	2802	210	67.4	4	852	138	20.5	3.4	2327	199	56	4.3	630	122	15.2	3.1	203	76	4.9	1.8	94	55	2.3	1.3	272	79	6.5	1.8	128	63	3.1	1.5	1356	178	32.6	4	1098	158	26.4	3.6	686	129	16.5
0500000US54025	54025	Greenbrier County, West Virginia	14944	380	14944	(X)	9586	409	64.1	2.5	3371	312	22.6	2	7156	394	47.9	2.4	2268	282	15.2	1.9	793	191	5.3	1.3	314	139	2.1	0.9	1637	218	11	1.5	789	173	5.3	1.2	5358	410	35.9	2.5	4609	398	30.8	2.4	1983	243	13.3
0500000US54027	54027	Hampshire County, West Virginia	9977	339	9977	(X)	5089	308	51	2.9	1599	210	16	2	3728	275	37.4	2.8	930	171	9.3	1.7	343	120	3.4	1.2	118	70	1.2	0.7	1018	200	10.2	2	551	171	5.5	1.7	4888	362	49	2.9	4613	347	46.2	2.9	1640	220	16.4
0500000US54029	54029	Hancock County, West Virginia	12844	301	12844	(X)	8116	356	63.2	2.2	2616	281	20.4	2	6026	355	46.9	2.5	1670	234	13	1.7	452	136	3.5	1.1	192	99	1.5	0.8	1638	256	12.8	1.9	754	182	5.9	1.4	4728	303	36.8	2.2	4171	309	32.5	2.3	1983	245	15.4
0500000US54031	54031	Hardy County, West Virginia	5350	251	5350	(X)	3753	267	70.1	3.5	1242	200	23.2	3.1	2854	243	53.3	4.1	737	138	13.8	2.4	378	130	7.1	2.4	201	96	3.8	1.7	521	126	9.7	2.2	304	112	5.7	2	1597	196	29.9	3.5	1425	184	26.6	3.4	611	133	11.4
0500000US54033	54033	Harrison County, West Virginia	27652	412	27652	(X)	17662	497	63.9	1.5	6854	347	24.8	1.1	13208	457	47.8	1.6	4595	298	16.6	1	1147	185	4.1	0.7	613	136	2.2	0.5	3307	347	12	1.2	1646	237	6	0.8	9990	455	36.1	1.5	8703	454	31.5	1.6	3753	295	13.6
0500000US54035	54035	Jackson County, West Virginia	11190	323	11190	(X)	7898	397	70.6	3.4	2570	318	23	2.7	6349	386	56.7	3.4	1941	306	17.3	2.6	401	146	3.6	1.3	154	94	1.4	0.8	1148	228	10.3	2.1	475	180	4.2	1.6	3292	415	29.4	3.4	2907	374	26	3.1	1424	267	12.7
0500000US54037	54037	Jefferson County, West Virginia	20634	329	20634	(X)	14516	309	70.3	1.5	6157	268	29.8	1.3	11365	387	55.1	1.8	4374	274	21.2	1.3	941	216	4.6	1.1	524	168	2.5	0.8	2210	261	10.7	1.3	1259	240	6.1	1.2	6118	352	29.7	1.5	4596	322	22.3	1.4	1711	207	8.3
0500000US54039	54039	Kanawha County, West Virginia	81708	797	81708	(X)	50159	941	61.4	1	18646	694	22.8	0.8	35746	917	43.7	1.1	11160	560	13.7	0.7	3762	401	4.6	0.5	2037	295	2.5	0.4	10651	629	13	0.7	5449	515	6.7	0.6	31549	876	38.6	1	27039	834	33.1	1	10284	449	12.6
0500000US54041	54041	Lewis County, West Virginia	6541	235	6541	(X)	4502	253	68.8	3.8	1632	175	25	2.6	3420	240	52.3	3.6	1066	169	16.3	2.5	329	101	5	1.5	184	82	2.8	1.3	753	143	11.5	2.2	382	111	5.8	1.7	2039	279	31.2	3.8	1641	256	25.1	3.6	786	152	12
0500000US54043	54043	Lincoln County, West Virginia	7965	280	7965	(X)	5370	332	67.4	3.7	1794	201	22.5	2.4	4073	322	51.1	3.8	1298	188	16.3	2.3	326	117	4.1	1.5	111	76	1.4	0.9	971	199	12.2	2.5	385	146	4.8	1.8	2595	319	32.6	3.7	2258	314	28.3	3.7	1035	180	13
0500000US54045	54045	Logan County, West Virginia	13976	360	13976	(X)	9683	412	69.3	2.6	3407	335	24.4	2.3	7183	389	51.4	2.7	2377	238	17	1.7	850	179	6.1	1.3	405	127	2.9	0.9	1650	215	11.8	1.5	625	173	4.5	1.2	4293	385	30.7	2.6	3694	347	26.4	2.3	1793	228	12.8
0500000US54047	54047	McDowell County, West Virginia	7963	288	7963	(X)	5373	338	67.5	2.9	1707	190	21.4	2.1	3556	266	44.7	2.8	1019	142	12.8	1.7	533	115	6.7	1.4	102	37	1.3	0.5	1284	187	16.1	2.2	586	146	7.4	1.7	2590	225	32.5	2.9	2188	228	27.5	2.9	860	150	10.8
0500000US54049	54049	Marion County, West Virginia	22427	471	22427	(X)	14792	471	66	1.7	5423	346	24.2	1.4	11200	400	49.9	1.7	3621	320	16.1	1.4	1065	182	4.7	0.8	609	151	2.7	0.7	2527	315	11.3	1.4	1193	193	5.3	0.8	7635	416	34	1.7	6364	397	28.4	1.7	2914	242	13
0500000US54051	54051	Marshall County, West Virginia	13306	342	13306	(X)	9029	387	67.9	2.5	3029	289	22.8	2	7208	413	54.2	2.8	2090	280	15.7	2	403	106	3	0.8	223	85	1.7	0.6	1418	250	10.7	1.9	716	201	5.4	1.5	4277	364	32.1	2.5	3591	330	27	2.3	1787	236	13.4
0500000US54053	54053	Mason County, West Virginia	10901	360	10901	(X)	7431	397	68.2	2.8	2776	239	25.5	2	5822	401	53.4	3.3	1937	225	17.8	2	380	133	3.5	1.2	170	87	1.6	0.8	1229	216	11.3	1.9	669	182	6.1	1.7	3470	323	31.8	2.8	3076	295	28.2	2.6	1644	227	15.1
0500000US54055	54055	Mercer County, West Virginia	25062	467	25062	(X)	16540	499	66	1.8	6176	432	24.6	1.6	12041	519	48	2.1	3653	388	14.6	1.5	1234	219	4.9	0.9	678	170	2.7	0.7	3265	296	13	1.1	1845	277	7.4	1.1	8522	514	34	1.8	7318	462	29.2	1.7	3280	363	13.1
0500000US54057	54057	Mineral County, West Virginia	11289	296	11289	(X)	6777	441	60	3.5	2305	300	20.4	2.5	5050	339	44.7	2.8	1360	209	12	1.8	496	146	4.4	1.3	143	103	1.3	0.9	1231	225	10.9	1.9	802	200	7.1	1.8	4512	402	40	3.5	4094	390	36.3	3.3	1472	194	13
0500000US54059	54059	Mingo County, West Virginia	10853	263	10853	(X)	7465	331	68.8	2.9	2929	256	27	2.2	5484	308	50.5	2.9	2127	236	19.6	2.1	458	118	4.2	1.1	153	59	1.4	0.5	1523	227	14	2	649	154	6	1.4	3388	343	31.2	2.9	3064	318	28.2	2.7	1412	209	13
0500000US54061	54061	Monongalia County, West Virginia	37820	587	37820	(X)	20027	582	53	1.6	8094	430	21.4	1.1	15407	596	40.7	1.6	5808	353	15.4	0.9	1508	264	4	0.7	621	168	1.6	0.4	3112	306	8.2	0.8	1665	246	4.4	0.7	17793	758	47	1.6	13348	765	35.3	1.8	3063	294	8.1
0500000US54063	54063	Monroe County, West Virginia	5932	231	5932	(X)	4169	246	70.3	3.4	1524	214	25.7	3.3	3190	293	53.8	4.5	1106	217	18.6	3.4	205	70	3.5	1.2	87	53	1.5	0.9	774	162	13	2.8	331	115	5.6	1.9	1763	218	29.7	3.4	1567	199	26.4	3.1	720	146	12.1
0500000US54065	54065	Morgan County, West Virginia	7207	293	7207	(X)	4292	273	59.6	3.8	1345	192	18.7	2.4	3539	284	49.1	4	1139	196	15.8	2.5	295	124	4.1	1.7	79	53	1.1	0.7	458	149	6.4	2.1	127	74	1.8	1	2915	333	40.4	3.8	2486	292	34.5	3.4	1179	199	16.4
0500000US54067	54067	Nicholas County, West Virginia	10752	275	10752	(X)	7612	386	70.8	3	2341	233	21.8	2.1	6081	379	56.6	3.2	1766	214	16.4	2	501	165	4.7	1.5	171	103	1.6	1	1030	247	9.6	2.3	404	153	3.8	1.4	3140	324	29.2	3	2645	282	24.6	2.6	1347	208	12.5
0500000US54069	54069	Ohio County, West Virginia	18519	273	18519	(X)	10785	381	58.2	2	4013	297	21.7	1.6	7886	356	42.6	1.9	2362	212	12.8	1.2	639	129	3.5	0.7	373	113	2	0.6	2260	254	12.2	1.4	1278	199	6.9	1.1	7734	401	41.8	2	6761	396	36.5	2	2935	277	15.8
0500000US54071	54071	Pendleton County, West Virginia	3133	141	3133	(X)	2035	147	65	4.2	623	84	19.9	2.6	1662	153	53	4.7	440	80	14	2.4	127	51	4.1	1.6	35	23	1.1	0.8	246	70	7.9	2.3	148	60	4.7	1.9	1098	147	35	4.2	999	144	31.9	4.2	558	95	17.8
0500000US54073	54073	Pleasants County, West Virginia	2863	120	2863	(X)	2132	105	74.5	3.6	772	92	27	3.1	1683	110	58.8	4.3	514	96	18	3.4	141	59	4.9	2	60	44	2.1	1.5	308	84	10.8	2.9	198	73	6.9	2.5	731	120	25.5	3.6	585	116	20.4	3.7	319	86	11.1
0500000US54075	54075	Pocahontas County, West Virginia	3646	180	3646	(X)	2286	159	62.7	4.1	672	118	18.4	2.9	1945	138	53.3	4	492	87	13.5	2.3	89	47	2.4	1.2	67	41	1.8	1.1	252	65	6.9	1.7	113	49	3.1	1.3	1360	179	37.3	4.1	1127	162	30.9	3.9	528	112	14.5
0500000US54077	54077	Preston County, West Virginia	12441	343	12441	(X)	8675	356	69.7	2.2	3009	272	24.2	1.9	6958	311	55.9	2.2	2171	223	17.5	1.7	572	126	4.6	1	258	92	2.1	0.7	1145	190	9.2	1.5	580	138	4.7	1.1	3766	290	30.3	2.2	3123	279	25.1	2.1	1539	176	12.4
0500000US54079	54079	Putnam County, West Virginia	21780	361	21780	(X)	15680	442	72	1.8	6664	364	30.6	1.6	12444	499	57.1	2.3	4836	349	22.2	1.6	821	252	3.8	1.2	480	184	2.2	0.8	2415	336	11.1	1.5	1348	257	6.2	1.2	6100	418	28	1.8	5295	395	24.3	1.7	2237	273	10.3
0500000US54081	54081	Raleigh County, West Virginia	30880	617	30880	(X)	20677	679	67	1.8	7772	479	25.2	1.4	15026	661	48.7	2	4868	388	15.8	1.2	1597	318	5.2	1	787	217	2.5	0.7	4054	476	13.1	1.6	2117	337	6.9	1.1	10203	606	33	1.8	8677	602	28.1	1.9	4128	408	13.4
0500000US54083	54083	Randolph County, West Virginia	11626	270	11626	(X)	7620	330	65.5	2.7	2490	214	21.4	1.7	6110	319	52.6	3	1747	167	15	1.4	485	115	4.2	1	237	91	2	0.8	1025	189	8.8	1.6	506	136	4.4	1.2	4006	348	34.5	2.7	3416	316	29.4	2.6	1546	205	13.3
0500000US54085	54085	Ritchie County, West Virginia	3967	209	3967	(X)	2536	191	63.9	3.9	881	124	22.2	2.6	1939	184	48.9	4.2	575	111	14.5	2.5	194	61	4.9	1.5	106	49	2.7	1.2	403	99	10.2	2.4	200	76	5	1.9	1431	179	36.1	3.9	1233	168	31.1	3.9	585	117	14.7
0500000US54087	54087	Roane County, West Virginia	5672	204	5672	(X)	3830	200	67.5	3.5	1267	143	22.3	2.3	3068	205	54.1	3.8	923	123	16.3	2.1	242	86	4.3	1.5	143	79	2.5	1.4	520	105	9.2	1.8	201	81	3.5	1.4	1842	232	32.5	3.5	1529	201	27	3.1	820	143	14.5
0500000US54089	54089	Summers County, West Virginia	5497	261	5497	(X)	3645	261	66.3	3.1	1298	179	23.6	2.9	2778	243	50.5	3.6	851	172	15.5	3	277	134	5	2.4	208	117	3.8	2.1	590	141	10.7	2.5	239	103	4.3	1.9	1852	180	33.7	3.1	1722	175	31.3	3	877	150	16
0500000US54091	54091	Taylor County, West Virginia	6732	228	6732	(X)	4446	294	66	3.9	1564	182	23.2	2.4	3347	286	49.7	4.2	1105	167	16.4	2.4	278	116	4.1	1.7	174	96	2.6	1.4	821	155	12.2	2.2	285	101	4.2	1.5	2286	275	34	3.9	1912	239	28.4	3.4	783	161	11.6
0500000US54093	54093	Tucker County, West Virginia	2924	161	2924	(X)	1975	151	67.5	3.6	771	88	26.4	2.6	1673	158	57.2	4.3	613	85	21	2.6	145	51	5	1.7	74	39	2.5	1.3	157	61	5.4	2.2	84	42	2.9	1.5	949	119	32.5	3.6	794	114	27.2	3.7	449	78	15.4
0500000US54095	54095	Tyler County, West Virginia	3518	161	3518	(X)	2280	132	64.8	3.7	665	91	18.9	2.4	1750	127	49.7	3.7	428	71	12.2	1.9	141	76	4	2.1	49	40	1.4	1.1	389	83	11.1	2.4	188	57	5.3	1.6	1238	161	35.2	3.7	1120	157	31.8	3.7	461	85	13.1
0500000US54097	54097	Upshur County, West Virginia	9105	226	9105	(X)	6301	271	69.2	2.6	2165	211	23.8	2.2	4909	263	53.9	2.8	1456	173	16	1.9	522	141	5.7	1.5	267	105	2.9	1.1	870	184	9.6	2	442	129	4.9	1.4	2804	249	30.8	2.6	2455	233	27	2.5	1093	158	12
0500000US54099	54099	Wayne County, West Virginia	16447	358	16447	(X)	10969	431	66.7	2.5	3973	316	24.2	1.9	7983	423	48.5	2.6	2575	239	15.7	1.5	908	218	5.5	1.3	477	174	2.9	1	2078	259	12.6	1.6	921	166	5.6	1	5478	443	33.3	2.5	5009	416	30.5	2.4	2347	236	14.3
0500000US54101	54101	Webster County, West Virginia	3952	196	3952	(X)	2682	213	67.9	4	865	126	21.9	2.7	1858	181	47	4.1	499	89	12.6	2.1	252	95	6.4	2.4	91	58	2.3	1.5	572	138	14.5	3.3	275	88	7	2.1	1270	164	32.1	4	1070	168	27.1	4.1	530	119	13.4
0500000US54103	54103	Wetzel County, West Virginia	6238	203	6238	(X)	3992	236	64	3	1204	152	19.3	2.2	3104	219	49.8	3	775	132	12.4	2	239	84	3.8	1.3	160	77	2.6	1.2	649	111	10.4	1.8	269	70	4.3	1.1	2246	196	36	3	1967	207	31.5	3.1	798	137	12.8
0500000US54105	54105	Wirt County, West Virginia	2432	138	2432	(X)	1499	144	61.6	5.7	496	102	20.4	4	1222	147	50.2	5.7	333	94	13.7	3.6	47	41	1.9	1.7	25	33	1	1.4	230	64	9.5	2.6	138	53	5.7	2.2	933	160	38.4	5.7	730	128	30	5	385	86	15.8
0500000US54107	54107	Wood County, West Virginia	36225	448	36225	(X)	23376	511	64.5	1.4	9055	410	25	1.1	17314	608	47.8	1.7	5704	424	15.7	1.1	1879	312	5.2	0.9	923	230	2.5	0.6	4183	379	11.5	1.1	2428	315	6.7	0.9	12849	560	35.5	1.4	11109	526	30.7	1.3	4716	391	13
0500000US54109	54109	Wyoming County, West Virginia	9222	210	9222	(X)	6570	313	71.2	2.9	2506	230	27.2	2.3	4998	324	54.2	3.3	1698	215	18.4	2.2	493	124	5.3	1.3	222	92	2.4	1	1079	204	11.7	2.2	586	148	6.4	1.6	2652	276	28.8	2.9	2401	261	26	2.8	1183	193	12.8
[truncated: 561 more columns]
