# Supplementary material for: Evaluation of Policy Effectiveness by Mathematical Modeling for the Opioid Crisis with Spatial Study and Trend Analysis
Source: Healthcare (Basel). 2021 May 14;9(5):585. doi: 10.3390/healthcare9050585 (PMC8155830; doi:10.3390/healthcare9050585)
Supplement: Supplementary file 1 [file healthcare-09-00585-s001.zip › Table S9.xlsx]

## Sheet: Table S9
GEO.id	Id
GEO.id2	Id2
GEO.display-label	Geography
HC01_VC03	Estimate; HOUSEHOLDS BY TYPE - Total households
HC02_VC03	Margin of Error; HOUSEHOLDS BY TYPE - Total households
HC03_VC03	Percent; HOUSEHOLDS BY TYPE - Total households
HC04_VC03	Percent Margin of Error; HOUSEHOLDS BY TYPE - Total households
HC01_VC04	Estimate; HOUSEHOLDS BY TYPE - Total households - Family households (families)
HC02_VC04	Margin of Error; HOUSEHOLDS BY TYPE - Total households - Family households (families)
HC03_VC04	Percent; HOUSEHOLDS BY TYPE - Total households - Family households (families)
HC04_VC04	Percent Margin of Error; HOUSEHOLDS BY TYPE - Total households - Family households (families)
HC01_VC05	Estimate; HOUSEHOLDS BY TYPE - Total households - Family households (families) - With own children of the householder under 18 years
HC02_VC05	Margin of Error; HOUSEHOLDS BY TYPE - Total households - Family households (families) - With own children of the householder under 18 years
HC03_VC05	Percent; HOUSEHOLDS BY TYPE - Total households - Family households (families) - With own children of the householder under 18 years
HC04_VC05	Percent Margin of Error; HOUSEHOLDS BY TYPE - Total households - Family households (families) - With own children of the householder under 18 years
HC01_VC06	Estimate; HOUSEHOLDS BY TYPE - Total households - Family households (families) - Married-couple family
HC02_VC06	Margin of Error; HOUSEHOLDS BY TYPE - Total households - Family households (families) - Married-couple family
HC03_VC06	Percent; HOUSEHOLDS BY TYPE - Total households - Family households (families) - Married-couple family
HC04_VC06	Percent Margin of Error; HOUSEHOLDS BY TYPE - Total households - Family households (families) - Married-couple family
HC01_VC07	Estimate; HOUSEHOLDS BY TYPE - Total households - Family households (families) - Married-couple family - With own children of the householder under 18 years
HC02_VC07	Margin of Error; HOUSEHOLDS BY TYPE - Total households - Family households (families) - Married-couple family - With own children of the householder under 18 years
HC03_VC07	Percent; HOUSEHOLDS BY TYPE - Total households - Family households (families) - Married-couple family - With own children of the householder under 18 years
HC04_VC07	Percent Margin of Error; HOUSEHOLDS BY TYPE - Total households - Family households (families) - Married-couple family - With own children of the householder under 18 years
HC01_VC08	Estimate; HOUSEHOLDS BY TYPE - Total households - Family households (families) - Male householder, no wife present, family
HC02_VC08	Margin of Error; HOUSEHOLDS BY TYPE - Total households - Family households (families) - Male householder, no wife present, family
HC03_VC08	Percent; HOUSEHOLDS BY TYPE - Total households - Family households (families) - Male householder, no wife present, family
HC04_VC08	Percent Margin of Error; HOUSEHOLDS BY TYPE - Total households - Family households (families) - Male householder, no wife present, family
HC01_VC09	Estimate; HOUSEHOLDS BY TYPE - Total households - Family households (families) - Male householder, no wife present, family - With own children of the householder under 18 years
HC02_VC09	Margin of Error; HOUSEHOLDS BY TYPE - Total households - Family households (families) - Male householder, no wife present, family - With own children of the householder under 18 years
HC03_VC09	Percent; HOUSEHOLDS BY TYPE - Total households - Family households (families) - Male householder, no wife present, family - With own children of the householder under 18 years
HC04_VC09	Percent Margin of Error; HOUSEHOLDS BY TYPE - Total households - Family households (families) - Male householder, no wife present, family - With own children of the householder under 18 years
HC01_VC10	Estimate; HOUSEHOLDS BY TYPE - Total households - Family households (families) - Female householder, no husband present, family
HC02_VC10	Margin of Error; HOUSEHOLDS BY TYPE - Total households - Family households (families) - Female householder, no husband present, family
HC03_VC10	Percent; HOUSEHOLDS BY TYPE - Total households - Family households (families) - Female householder, no husband present, family
HC04_VC10	Percent Margin of Error; HOUSEHOLDS BY TYPE - Total households - Family households (families) - Female householder, no husband present, family
HC01_VC11	Estimate; HOUSEHOLDS BY TYPE - Total households - Family households (families) - Female householder, no husband present, family - With own children of the householder under 18 years
HC02_VC11	Margin of Error; HOUSEHOLDS BY TYPE - Total households - Family households (families) - Female householder, no husband present, family - With own children of the householder under 18 years
HC03_VC11	Percent; HOUSEHOLDS BY TYPE - Total households - Family households (families) - Female householder, no husband present, family - With own children of the householder under 18 years
HC04_VC11	Percent Margin of Error; HOUSEHOLDS BY TYPE - Total households - Family households (families) - Female householder, no husband present, family - With own children of the householder under 18 years
HC01_VC12	Estimate; HOUSEHOLDS BY TYPE - Total households - Nonfamily households
HC02_VC12	Margin of Error; HOUSEHOLDS BY TYPE - Total households - Nonfamily households
HC03_VC12	Percent; HOUSEHOLDS BY TYPE - Total households - Nonfamily households
HC04_VC12	Percent Margin of Error; HOUSEHOLDS BY TYPE - Total households - Nonfamily households
HC01_VC13	Estimate; HOUSEHOLDS BY TYPE - Total households - Nonfamily households - Householder living alone
HC02_VC13	Margin of Error; HOUSEHOLDS BY TYPE - Total households - Nonfamily households - Householder living alone
HC03_VC13	Percent; HOUSEHOLDS BY TYPE - Total households - Nonfamily households - Householder living alone
HC04_VC13	Percent Margin of Error; HOUSEHOLDS BY TYPE - Total households - Nonfamily households - Householder living alone
HC01_VC14	Estimate; HOUSEHOLDS BY TYPE - Total households - Nonfamily households - Householder living alone - 65 years and over
HC02_VC14	Margin of Error; HOUSEHOLDS BY TYPE - Total households - Nonfamily households - Householder living alone - 65 years and over
HC03_VC14	Percent; HOUSEHOLDS BY TYPE - Total households - Nonfamily households - Householder living alone - 65 years and over
HC04_VC14	Percent Margin of Error; HOUSEHOLDS BY TYPE - Total households - Nonfamily households - Householder living alone - 65 years and over
HC01_VC17	Estimate; HOUSEHOLDS BY TYPE - Households with one or more people under 18 years
HC02_VC17	Margin of Error; HOUSEHOLDS BY TYPE - Households with one or more people under 18 years
HC03_VC17	Percent; HOUSEHOLDS BY TYPE - Households with one or more people under 18 years
HC04_VC17	Percent Margin of Error; HOUSEHOLDS BY TYPE - Households with one or more people under 18 years
HC01_VC18	Estimate; HOUSEHOLDS BY TYPE - Households with one or more people 65 years and over
HC02_VC18	Margin of Error; HOUSEHOLDS BY TYPE - Households with one or more people 65 years and over
HC03_VC18	Percent; HOUSEHOLDS BY TYPE - Households with one or more people 65 years and over
HC04_VC18	Percent Margin of Error; HOUSEHOLDS BY TYPE - Households with one or more people 65 years and over
HC01_VC21	Estimate; HOUSEHOLDS BY TYPE - Average household size
HC02_VC21	Margin of Error; HOUSEHOLDS BY TYPE - Average household size
HC03_VC21	Percent; HOUSEHOLDS BY TYPE - Average household size
HC04_VC21	Percent Margin of Error; HOUSEHOLDS BY TYPE - Average household size
HC01_VC22	Estimate; HOUSEHOLDS BY TYPE - Average family size
HC02_VC22	Margin of Error; HOUSEHOLDS BY TYPE - Average family size
HC03_VC22	Percent; HOUSEHOLDS BY TYPE - Average family size
HC04_VC22	Percent Margin of Error; HOUSEHOLDS BY TYPE - Average family size
HC01_VC26	Estimate; RELATIONSHIP - Population in households
HC02_VC26	Margin of Error; RELATIONSHIP - Population in households
HC03_VC26	Percent; RELATIONSHIP - Population in households
HC04_VC26	Percent Margin of Error; RELATIONSHIP - Population in households
HC01_VC27	Estimate; RELATIONSHIP - Population in households - Householder
HC02_VC27	Margin of Error; RELATIONSHIP - Population in households - Householder
HC03_VC27	Percent; RELATIONSHIP - Population in households - Householder
HC04_VC27	Percent Margin of Error; RELATIONSHIP - Population in households - Householder
HC01_VC28	Estimate; RELATIONSHIP - Population in households - Spouse
HC02_VC28	Margin of Error; RELATIONSHIP - Population in households - Spouse
HC03_VC28	Percent; RELATIONSHIP - Population in households - Spouse
HC04_VC28	Percent Margin of Error; RELATIONSHIP - Population in households - Spouse
HC01_VC29	Estimate; RELATIONSHIP - Population in households - Child
HC02_VC29	Margin of Error; RELATIONSHIP - Population in households - Child
HC03_VC29	Percent; RELATIONSHIP - Population in households - Child
HC04_VC29	Percent Margin of Error; RELATIONSHIP - Population in households - Child
HC01_VC30	Estimate; RELATIONSHIP - Population in households - Other relatives
HC02_VC30	Margin of Error; RELATIONSHIP - Population in households - Other relatives
HC03_VC30	Percent; RELATIONSHIP - Population in households - Other relatives
HC04_VC30	Percent Margin of Error; RELATIONSHIP - Population in households - Other relatives
HC01_VC31	Estimate; RELATIONSHIP - Population in households - Nonrelatives
HC02_VC31	Margin of Error; RELATIONSHIP - Population in households - Nonrelatives
HC03_VC31	Percent; RELATIONSHIP - Population in households - Nonrelatives
HC04_VC31	Percent Margin of Error; RELATIONSHIP - Population in households - Nonrelatives
HC01_VC32	Estimate; RELATIONSHIP - Population in households - Nonrelatives - Unmarried partner
HC02_VC32	Margin of Error; RELATIONSHIP - Population in households - Nonrelatives - Unmarried partner
HC03_VC32	Percent; RELATIONSHIP - Population in households - Nonrelatives - Unmarried partner
HC04_VC32	Percent Margin of Error; RELATIONSHIP - Population in households - Nonrelatives - Unmarried partner
HC01_VC36	Estimate; MARITAL STATUS - Males 15 years and over
HC02_VC36	Margin of Error; MARITAL STATUS - Males 15 years and over
HC03_VC36	Percent; MARITAL STATUS - Males 15 years and over
HC04_VC36	Percent Margin of Error; MARITAL STATUS - Males 15 years and over
HC01_VC37	Estimate; MARITAL STATUS - Males 15 years and over - Never married
HC02_VC37	Margin of Error; MARITAL STATUS - Males 15 years and over - Never married
HC03_VC37	Percent; MARITAL STATUS - Males 15 years and over - Never married
HC04_VC37	Percent Margin of Error; MARITAL STATUS - Males 15 years and over - Never married
HC01_VC38	Estimate; MARITAL STATUS - Males 15 years and over - Now married, except separated
HC02_VC38	Margin of Error; MARITAL STATUS - Males 15 years and over - Now married, except separated
HC03_VC38	Percent; MARITAL STATUS - Males 15 years and over - Now married, except separated
HC04_VC38	Percent Margin of Error; MARITAL STATUS - Males 15 years and over - Now married, except separated
HC01_VC39	Estimate; MARITAL STATUS - Males 15 years and over - Separated
HC02_VC39	Margin of Error; MARITAL STATUS - Males 15 years and over - Separated
HC03_VC39	Percent; MARITAL STATUS - Males 15 years and over - Separated
HC04_VC39	Percent Margin of Error; MARITAL STATUS - Males 15 years and over - Separated
HC01_VC40	Estimate; MARITAL STATUS - Males 15 years and over - Widowed
HC02_VC40	Margin of Error; MARITAL STATUS - Males 15 years and over - Widowed
HC03_VC40	Percent; MARITAL STATUS - Males 15 years and over - Widowed
HC04_VC40	Percent Margin of Error; MARITAL STATUS - Males 15 years and over - Widowed
HC01_VC41	Estimate; MARITAL STATUS - Males 15 years and over - Divorced
HC02_VC41	Margin of Error; MARITAL STATUS - Males 15 years and over - Divorced
HC03_VC41	Percent; MARITAL STATUS - Males 15 years and over - Divorced
HC04_VC41	Percent Margin of Error; MARITAL STATUS - Males 15 years and over - Divorced
HC01_VC43	Estimate; MARITAL STATUS - Females 15 years and over
HC02_VC43	Margin of Error; MARITAL STATUS - Females 15 years and over
HC03_VC43	Percent; MARITAL STATUS - Females 15 years and over
HC04_VC43	Percent Margin of Error; MARITAL STATUS - Females 15 years and over
HC01_VC44	Estimate; MARITAL STATUS - Females 15 years and over - Never married
HC02_VC44	Margin of Error; MARITAL STATUS - Females 15 years and over - Never married
HC03_VC44	Percent; MARITAL STATUS - Females 15 years and over - Never married
HC04_VC44	Percent Margin of Error; MARITAL STATUS - Females 15 years and over - Never married
HC01_VC45	Estimate; MARITAL STATUS - Females 15 years and over - Now married, except separated
HC02_VC45	Margin of Error; MARITAL STATUS - Females 15 years and over - Now married, except separated
HC03_VC45	Percent; MARITAL STATUS - Females 15 years and over - Now married, except separated
HC04_VC45	Percent Margin of Error; MARITAL STATUS - Females 15 years and over - Now married, except separated
HC01_VC46	Estimate; MARITAL STATUS - Females 15 years and over - Separated
HC02_VC46	Margin of Error; MARITAL STATUS - Females 15 years and over - Separated
HC03_VC46	Percent; MARITAL STATUS - Females 15 years and over - Separated
HC04_VC46	Percent Margin of Error; MARITAL STATUS - Females 15 years and over - Separated
HC01_VC47	Estimate; MARITAL STATUS - Females 15 years and over - Widowed
HC02_VC47	Margin of Error; MARITAL STATUS - Females 15 years and over - Widowed
HC03_VC47	Percent; MARITAL STATUS - Females 15 years and over - Widowed
HC04_VC47	Percent Margin of Error; MARITAL STATUS - Females 15 years and over - Widowed
HC01_VC48	Estimate; MARITAL STATUS - Females 15 years and over - Divorced
HC02_VC48	Margin of Error; MARITAL STATUS - Females 15 years and over - Divorced
HC03_VC48	Percent; MARITAL STATUS - Females 15 years and over - Divorced
HC04_VC48	Percent Margin of Error; MARITAL STATUS - Females 15 years and over - Divorced
HC01_VC52	Estimate; FERTILITY - Number of women 15 to 50 years old who had a birth in the past 12 months
HC02_VC52	Margin of Error; FERTILITY - Number of women 15 to 50 years old who had a birth in the past 12 months
HC03_VC52	Percent; FERTILITY - Number of women 15 to 50 years old who had a birth in the past 12 months
HC04_VC52	Percent Margin of Error; FERTILITY - Number of women 15 to 50 years old who had a birth in the past 12 months
HC01_VC53	Estimate; FERTILITY - Number of women 15 to 50 years old who had a birth in the past 12 months - Unmarried women (widowed, divorced, and never married)
HC02_VC53	Margin of Error; FERTILITY - Number of women 15 to 50 years old who had a birth in the past 12 months - Unmarried women (widowed, divorced, and never married)
HC03_VC53	Percent; FERTILITY - Number of women 15 to 50 years old who had a birth in the past 12 months - Unmarried women (widowed, divorced, and never married)
HC04_VC53	Percent Margin of Error; FERTILITY - Number of women 15 to 50 years old who had a birth in the past 12 months - Unmarried women (widowed, divorced, and never married)
HC01_VC54	Estimate; FERTILITY - Number of women 15 to 50 years old who had a birth in the past 12 months - Unmarried women (widowed, divorced, and never married) - Per 1,000 unmarried women
HC02_VC54	Margin of Error; FERTILITY - Number of women 15 to 50 years old who had a birth in the past 12 months - Unmarried women (widowed, divorced, and never married) - Per 1,000 unmarried women
HC03_VC54	Percent; FERTILITY - Number of women 15 to 50 years old who had a birth in the past 12 months - Unmarried women (widowed, divorced, and never married) - Per 1,000 unmarried women
HC04_VC54	Percent Margin of Error; FERTILITY - Number of women 15 to 50 years old who had a birth in the past 12 months - Unmarried women (widowed, divorced, and never married) - Per 1,000 unmarried women
HC01_VC55	Estimate; FERTILITY - Number of women 15 to 50 years old who had a birth in the past 12 months - Per 1,000 women 15 to 50 years old
HC02_VC55	Margin of Error; FERTILITY - Number of women 15 to 50 years old who had a birth in the past 12 months - Per 1,000 women 15 to 50 years old
HC03_VC55	Percent; FERTILITY - Number of women 15 to 50 years old who had a birth in the past 12 months - Per 1,000 women 15 to 50 years old
HC04_VC55	Percent Margin of Error; FERTILITY - Number of women 15 to 50 years old who had a birth in the past 12 months - Per 1,000 women 15 to 50 years old
HC01_VC56	Estimate; FERTILITY - Number of women 15 to 50 years old who had a birth in the past 12 months - Per 1,000 women 15 to 19 years old
HC02_VC56	Margin of Error; FERTILITY - Number of women 15 to 50 years old who had a birth in the past 12 months - Per 1,000 women 15 to 19 years old
HC03_VC56	Percent; FERTILITY - Number of women 15 to 50 years old who had a birth in the past 12 months - Per 1,000 women 15 to 19 years old
HC04_VC56	Percent Margin of Error; FERTILITY - Number of women 15 to 50 years old who had a birth in the past 12 months - Per 1,000 women 15 to 19 years old
HC01_VC57	Estimate; FERTILITY - Number of women 15 to 50 years old who had a birth in the past 12 months - Per 1,000 women 20 to 34 years old
HC02_VC57	Margin of Error; FERTILITY - Number of women 15 to 50 years old who had a birth in the past 12 months - Per 1,000 women 20 to 34 years old
HC03_VC57	Percent; FERTILITY - Number of women 15 to 50 years old who had a birth in the past 12 months - Per 1,000 women 20 to 34 years old
HC04_VC57	Percent Margin of Error; FERTILITY - Number of women 15 to 50 years old who had a birth in the past 12 months - Per 1,000 women 20 to 34 years old
HC01_VC58	Estimate; FERTILITY - Number of women 15 to 50 years old who had a birth in the past 12 months - Per 1,000 women 35 to 50 years old
HC02_VC58	Margin of Error; FERTILITY - Number of women 15 to 50 years old who had a birth in the past 12 months - Per 1,000 women 35 to 50 years old
HC03_VC58	Percent; FERTILITY - Number of women 15 to 50 years old who had a birth in the past 12 months - Per 1,000 women 35 to 50 years old
HC04_VC58	Percent Margin of Error; FERTILITY - Number of women 15 to 50 years old who had a birth in the past 12 months - Per 1,000 women 35 to 50 years old
HC01_VC62	Estimate; GRANDPARENTS - Number of grandparents living with own grandchildren under 18 years
HC02_VC62	Margin of Error; GRANDPARENTS - Number of grandparents living with own grandchildren under 18 years
HC03_VC62	Percent; GRANDPARENTS - Number of grandparents living with own grandchildren under 18 years
HC04_VC62	Percent Margin of Error; GRANDPARENTS - Number of grandparents living with own grandchildren under 18 years
HC01_VC63	Estimate; GRANDPARENTS - Number of grandparents living with own grandchildren under 18 years - Grandparents responsible for grandchildren
HC02_VC63	Margin of Error; GRANDPARENTS - Number of grandparents living with own grandchildren under 18 years - Grandparents responsible for grandchildren
HC03_VC63	Percent; GRANDPARENTS - Number of grandparents living with own grandchildren under 18 years - Grandparents responsible for grandchildren
HC04_VC63	Percent Margin of Error; GRANDPARENTS - Number of grandparents living with own grandchildren under 18 years - Grandparents responsible for grandchildren
HC01_VC65	Estimate; GRANDPARENTS - Number of grandparents living with own grandchildren under 18 years - Years responsible for grandchildren - Less than 1 year
HC02_VC65	Margin of Error; GRANDPARENTS - Number of grandparents living with own grandchildren under 18 years - Years responsible for grandchildren - Less than 1 year
HC03_VC65	Percent; GRANDPARENTS - Number of grandparents living with own grandchildren under 18 years - Years responsible for grandchildren - Less than 1 year
HC04_VC65	Percent Margin of Error; GRANDPARENTS - Number of grandparents living with own grandchildren under 18 years - Years responsible for grandchildren - Less than 1 year
HC01_VC66	Estimate; GRANDPARENTS - Number of grandparents living with own grandchildren under 18 years - Years responsible for grandchildren - 1 or 2 years
HC02_VC66	Margin of Error; GRANDPARENTS - Number of grandparents living with own grandchildren under 18 years - Years responsible for grandchildren - 1 or 2 years
HC03_VC66	Percent; GRANDPARENTS - Number of grandparents living with own grandchildren under 18 years - Years responsible for grandchildren - 1 or 2 years
HC04_VC66	Percent Margin of Error; GRANDPARENTS - Number of grandparents living with own grandchildren under 18 years - Years responsible for grandchildren - 1 or 2 years
HC01_VC67	Estimate; GRANDPARENTS - Number of grandparents living with own grandchildren under 18 years - Years responsible for grandchildren - 3 or 4 years
HC02_VC67	Margin of Error; GRANDPARENTS - Number of grandparents living with own grandchildren under 18 years - Years responsible for grandchildren - 3 or 4 years
HC03_VC67	Percent; GRANDPARENTS - Number of grandparents living with own grandchildren under 18 years - Years responsible for grandchildren - 3 or 4 years
HC04_VC67	Percent Margin of Error; GRANDPARENTS - Number of grandparents living with own grandchildren under 18 years - Years responsible for grandchildren - 3 or 4 years
HC01_VC68	Estimate; GRANDPARENTS - Number of grandparents living with own grandchildren under 18 years - Years responsible for grandchildren - 5 or more years
HC02_VC68	Margin of Error; GRANDPARENTS - Number of grandparents living with own grandchildren under 18 years - Years responsible for grandchildren - 5 or more years
HC03_VC68	Percent; GRANDPARENTS - Number of grandparents living with own grandchildren under 18 years - Years responsible for grandchildren - 5 or more years
HC04_VC68	Percent Margin of Error; GRANDPARENTS - Number of grandparents living with own grandchildren under 18 years - Years responsible for grandchildren - 5 or more years
HC01_VC70	Estimate; GRANDPARENTS - Number of grandparents responsible for own grandchildren under 18 years
HC02_VC70	Margin of Error; GRANDPARENTS - Number of grandparents responsible for own grandchildren under 18 years
HC03_VC70	Percent; GRANDPARENTS - Number of grandparents responsible for own grandchildren under 18 years
HC04_VC70	Percent Margin of Error; GRANDPARENTS - Number of grandparents responsible for own grandchildren under 18 years
HC01_VC71	Estimate; GRANDPARENTS - Number of grandparents responsible for own grandchildren under 18 years - Who are female
HC02_VC71	Margin of Error; GRANDPARENTS - Number of grandparents responsible for own grandchildren under 18 years - Who are female
HC03_VC71	Percent; GRANDPARENTS - Number of grandparents responsible for own grandchildren under 18 years - Who are female
HC04_VC71	Percent Margin of Error; GRANDPARENTS - Number of grandparents responsible for own grandchildren under 18 years - Who are female
HC01_VC72	Estimate; GRANDPARENTS - Number of grandparents responsible for own grandchildren under 18 years - Who are married
HC02_VC72	Margin of Error; GRANDPARENTS - Number of grandparents responsible for own grandchildren under 18 years - Who are married
HC03_VC72	Percent; GRANDPARENTS - Number of grandparents responsible for own grandchildren under 18 years - Who are married
HC04_VC72	Percent Margin of Error; GRANDPARENTS - Number of grandparents responsible for own grandchildren under 18 years - Who are married
HC01_VC76	Estimate; SCHOOL ENROLLMENT - Population 3 years and over enrolled in school
HC02_VC76	Margin of Error; SCHOOL ENROLLMENT - Population 3 years and over enrolled in school
HC03_VC76	Percent; SCHOOL ENROLLMENT - Population 3 years and over enrolled in school
HC04_VC76	Percent Margin of Error; SCHOOL ENROLLMENT - Population 3 years and over enrolled in school
HC01_VC77	Estimate; SCHOOL ENROLLMENT - Population 3 years and over enrolled in school - Nursery school, preschool
HC02_VC77	Margin of Error; SCHOOL ENROLLMENT - Population 3 years and over enrolled in school - Nursery school, preschool
HC03_VC77	Percent; SCHOOL ENROLLMENT - Population 3 years and over enrolled in school - Nursery school, preschool
HC04_VC77	Percent Margin of Error; SCHOOL ENROLLMENT - Population 3 years and over enrolled in school - Nursery school, preschool
HC01_VC78	Estimate; SCHOOL ENROLLMENT - Population 3 years and over enrolled in school - Kindergarten
HC02_VC78	Margin of Error; SCHOOL ENROLLMENT - Population 3 years and over enrolled in school - Kindergarten
HC03_VC78	Percent; SCHOOL ENROLLMENT - Population 3 years and over enrolled in school - Kindergarten
HC04_VC78	Percent Margin of Error; SCHOOL ENROLLMENT - Population 3 years and over enrolled in school - Kindergarten
HC01_VC79	Estimate; SCHOOL ENROLLMENT - Population 3 years and over enrolled in school - Elementary school (grades 1-8)
HC02_VC79	Margin of Error; SCHOOL ENROLLMENT - Population 3 years and over enrolled in school - Elementary school (grades 1-8)
HC03_VC79	Percent; SCHOOL ENROLLMENT - Population 3 years and over enrolled in school - Elementary school (grades 1-8)
HC04_VC79	Percent Margin of Error; SCHOOL ENROLLMENT - Population 3 years and over enrolled in school - Elementary school (grades 1-8)
HC01_VC80	Estimate; SCHOOL ENROLLMENT - Population 3 years and over enrolled in school - High school (grades 9-12)
HC02_VC80	Margin of Error; SCHOOL ENROLLMENT - Population 3 years and over enrolled in school - High school (grades 9-12)
HC03_VC80	Percent; SCHOOL ENROLLMENT - Population 3 years and over enrolled in school - High school (grades 9-12)
HC04_VC80	Percent Margin of Error; SCHOOL ENROLLMENT - Population 3 years and over enrolled in school - High school (grades 9-12)
HC01_VC81	Estimate; SCHOOL ENROLLMENT - Population 3 years and over enrolled in school - College or graduate school
HC02_VC81	Margin of Error; SCHOOL ENROLLMENT - Population 3 years and over enrolled in school - College or graduate school
HC03_VC81	Percent; SCHOOL ENROLLMENT - Population 3 years and over enrolled in school - College or graduate school
HC04_VC81	Percent Margin of Error; SCHOOL ENROLLMENT - Population 3 years and over enrolled in school - College or graduate school
HC01_VC85	Estimate; EDUCATIONAL ATTAINMENT - Population 25 years and over
HC02_VC85	Margin of Error; EDUCATIONAL ATTAINMENT - Population 25 years and over
HC03_VC85	Percent; EDUCATIONAL ATTAINMENT - Population 25 years and over
HC04_VC85	Percent Margin of Error; EDUCATIONAL ATTAINMENT - Population 25 years and over
HC01_VC86	Estimate; EDUCATIONAL ATTAINMENT - Population 25 years and over - Less than 9th grade
HC02_VC86	Margin of Error; EDUCATIONAL ATTAINMENT - Population 25 years and over - Less than 9th grade
HC03_VC86	Percent; EDUCATIONAL ATTAINMENT - Population 25 years and over - Less than 9th grade
HC04_VC86	Percent Margin of Error; EDUCATIONAL ATTAINMENT - Population 25 years and over - Less than 9th grade
HC01_VC87	Estimate; EDUCATIONAL ATTAINMENT - Population 25 years and over - 9th to 12th grade, no diploma
HC02_VC87	Margin of Error; EDUCATIONAL ATTAINMENT - Population 25 years and over - 9th to 12th grade, no diploma
HC03_VC87	Percent; EDUCATIONAL ATTAINMENT - Population 25 years and over - 9th to 12th grade, no diploma
HC04_VC87	Percent Margin of Error; EDUCATIONAL ATTAINMENT - Population 25 years and over - 9th to 12th grade, no diploma
HC01_VC88	Estimate; EDUCATIONAL ATTAINMENT - Population 25 years and over - High school graduate (includes equivalency)
HC02_VC88	Margin of Error; EDUCATIONAL ATTAINMENT - Population 25 years and over - High school graduate (includes equivalency)
HC03_VC88	Percent; EDUCATIONAL ATTAINMENT - Population 25 years and over - High school graduate (includes equivalency)
HC04_VC88	Percent Margin of Error; EDUCATIONAL ATTAINMENT - Population 25 years and over - High school graduate (includes equivalency)
HC01_VC89	Estimate; EDUCATIONAL ATTAINMENT - Population 25 years and over - Some college, no degree
HC02_VC89	Margin of Error; EDUCATIONAL ATTAINMENT - Population 25 years and over - Some college, no degree
HC03_VC89	Percent; EDUCATIONAL ATTAINMENT - Population 25 years and over - Some college, no degree
HC04_VC89	Percent Margin of Error; EDUCATIONAL ATTAINMENT - Population 25 years and over - Some college, no degree
HC01_VC90	Estimate; EDUCATIONAL ATTAINMENT - Population 25 years and over - Associate's degree
HC02_VC90	Margin of Error; EDUCATIONAL ATTAINMENT - Population 25 years and over - Associate's degree
HC03_VC90	Percent; EDUCATIONAL ATTAINMENT - Population 25 years and over - Associate's degree
HC04_VC90	Percent Margin of Error; EDUCATIONAL ATTAINMENT - Population 25 years and over - Associate's degree
HC01_VC91	Estimate; EDUCATIONAL ATTAINMENT - Population 25 years and over - Bachelor's degree
HC02_VC91	Margin of Error; EDUCATIONAL ATTAINMENT - Population 25 years and over - Bachelor's degree
HC03_VC91	Percent; EDUCATIONAL ATTAINMENT - Population 25 years and over - Bachelor's degree
HC04_VC91	Percent Margin of Error; EDUCATIONAL ATTAINMENT - Population 25 years and over - Bachelor's degree
HC01_VC92	Estimate; EDUCATIONAL ATTAINMENT - Population 25 years and over - Graduate or professional degree
HC02_VC92	Margin of Error; EDUCATIONAL ATTAINMENT - Population 25 years and over - Graduate or professional degree
HC03_VC92	Percent; EDUCATIONAL ATTAINMENT - Population 25 years and over - Graduate or professional degree
HC04_VC92	Percent Margin of Error; EDUCATIONAL ATTAINMENT - Population 25 years and over - Graduate or professional degree
HC01_VC95	Estimate; EDUCATIONAL ATTAINMENT - Percent high school graduate or higher
HC02_VC95	Margin of Error; EDUCATIONAL ATTAINMENT - Percent high school graduate or higher
HC03_VC95	Percent; EDUCATIONAL ATTAINMENT - Percent high school graduate or higher
HC04_VC95	Percent Margin of Error; EDUCATIONAL ATTAINMENT - Percent high school graduate or higher
HC01_VC96	Estimate; EDUCATIONAL ATTAINMENT - Percent bachelor's degree or higher
HC02_VC96	Margin of Error; EDUCATIONAL ATTAINMENT - Percent bachelor's degree or higher
HC03_VC96	Percent; EDUCATIONAL ATTAINMENT - Percent bachelor's degree or higher
HC04_VC96	Percent Margin of Error; EDUCATIONAL ATTAINMENT - Percent bachelor's degree or higher
HC01_VC100	Estimate; VETERAN STATUS - Civilian population 18 years and over
HC02_VC100	Margin of Error; VETERAN STATUS - Civilian population 18 years and over
HC03_VC100	Percent; VETERAN STATUS - Civilian population 18 years and over
HC04_VC100	Percent Margin of Error; VETERAN STATUS - Civilian population 18 years and over
HC01_VC101	Estimate; VETERAN STATUS - Civilian population 18 years and over - Civilian veterans
HC02_VC101	Margin of Error; VETERAN STATUS - Civilian population 18 years and over - Civilian veterans
HC03_VC101	Percent; VETERAN STATUS - Civilian population 18 years and over - Civilian veterans
HC04_VC101	Percent Margin of Error; VETERAN STATUS - Civilian population 18 years and over - Civilian veterans
HC01_VC105	Estimate; DISABILITY STATUS OF THE CIVILIAN NONINSTITUTIONALIZED POPULATION - Total Civilian Noninstitutionalized Population
HC02_VC105	Margin of Error; DISABILITY STATUS OF THE CIVILIAN NONINSTITUTIONALIZED POPULATION - Total Civilian Noninstitutionalized Population
HC03_VC105	Percent; DISABILITY STATUS OF THE CIVILIAN NONINSTITUTIONALIZED POPULATION - Total Civilian Noninstitutionalized Population
HC04_VC105	Percent Margin of Error; DISABILITY STATUS OF THE CIVILIAN NONINSTITUTIONALIZED POPULATION - Total Civilian Noninstitutionalized Population
HC01_VC106	Estimate; DISABILITY STATUS OF THE CIVILIAN NONINSTITUTIONALIZED POPULATION - Total Civilian Noninstitutionalized Population - With a disability
HC02_VC106	Margin of Error; DISABILITY STATUS OF THE CIVILIAN NONINSTITUTIONALIZED POPULATION - Total Civilian Noninstitutionalized Population - With a disability
HC03_VC106	Percent; DISABILITY STATUS OF THE CIVILIAN NONINSTITUTIONALIZED POPULATION - Total Civilian Noninstitutionalized Population - With a disability
HC04_VC106	Percent Margin of Error; DISABILITY STATUS OF THE CIVILIAN NONINSTITUTIONALIZED POPULATION - Total Civilian Noninstitutionalized Population - With a disability
HC01_VC108	Estimate; DISABILITY STATUS OF THE CIVILIAN NONINSTITUTIONALIZED POPULATION - Under 18 years
HC02_VC108	Margin of Error; DISABILITY STATUS OF THE CIVILIAN NONINSTITUTIONALIZED POPULATION - Under 18 years
HC03_VC108	Percent; DISABILITY STATUS OF THE CIVILIAN NONINSTITUTIONALIZED POPULATION - Under 18 years
HC04_VC108	Percent Margin of Error; DISABILITY STATUS OF THE CIVILIAN NONINSTITUTIONALIZED POPULATION - Under 18 years
HC01_VC109	Estimate; DISABILITY STATUS OF THE CIVILIAN NONINSTITUTIONALIZED POPULATION - Under 18 years - With a disability
HC02_VC109	Margin of Error; DISABILITY STATUS OF THE CIVILIAN NONINSTITUTIONALIZED POPULATION - Under 18 years - With a disability
HC03_VC109	Percent; DISABILITY STATUS OF THE CIVILIAN NONINSTITUTIONALIZED POPULATION - Under 18 years - With a disability
HC04_VC109	Percent Margin of Error; DISABILITY STATUS OF THE CIVILIAN NONINSTITUTIONALIZED POPULATION - Under 18 years - With a disability
HC01_VC111	Estimate; DISABILITY STATUS OF THE CIVILIAN NONINSTITUTIONALIZED POPULATION - 18 to 64 years
HC02_VC111	Margin of Error; DISABILITY STATUS OF THE CIVILIAN NONINSTITUTIONALIZED POPULATION - 18 to 64 years
HC03_VC111	Percent; DISABILITY STATUS OF THE CIVILIAN NONINSTITUTIONALIZED POPULATION - 18 to 64 years
HC04_VC111	Percent Margin of Error; DISABILITY STATUS OF THE CIVILIAN NONINSTITUTIONALIZED POPULATION - 18 to 64 years
HC01_VC112	Estimate; DISABILITY STATUS OF THE CIVILIAN NONINSTITUTIONALIZED POPULATION - 18 to 64 years - With a disability
HC02_VC112	Margin of Error; DISABILITY STATUS OF THE CIVILIAN NONINSTITUTIONALIZED POPULATION - 18 to 64 years - With a disability
HC03_VC112	Percent; DISABILITY STATUS OF THE CIVILIAN NONINSTITUTIONALIZED POPULATION - 18 to 64 years - With a disability
HC04_VC112	Percent Margin of Error; DISABILITY STATUS OF THE CIVILIAN NONINSTITUTIONALIZED POPULATION - 18 to 64 years - With a disability
HC01_VC114	Estimate; DISABILITY STATUS OF THE CIVILIAN NONINSTITUTIONALIZED POPULATION - 65 years and over
HC02_VC114	Margin of Error; DISABILITY STATUS OF THE CIVILIAN NONINSTITUTIONALIZED POPULATION - 65 years and over
HC03_VC114	Percent; DISABILITY STATUS OF THE CIVILIAN NONINSTITUTIONALIZED POPULATION - 65 years and over
HC04_VC114	Percent Margin of Error; DISABILITY STATUS OF THE CIVILIAN NONINSTITUTIONALIZED POPULATION - 65 years and over
HC01_VC115	Estimate; DISABILITY STATUS OF THE CIVILIAN NONINSTITUTIONALIZED POPULATION - 65 years and over - With a disability
HC02_VC115	Margin of Error; DISABILITY STATUS OF THE CIVILIAN NONINSTITUTIONALIZED POPULATION - 65 years and over - With a disability
HC03_VC115	Percent; DISABILITY STATUS OF THE CIVILIAN NONINSTITUTIONALIZED POPULATION - 65 years and over - With a disability
HC04_VC115	Percent Margin of Error; DISABILITY STATUS OF THE CIVILIAN NONINSTITUTIONALIZED POPULATION - 65 years and over - With a disability
HC01_VC119	Estimate; RESIDENCE 1 YEAR AGO - Population 1 year and over
HC02_VC119	Margin of Error; RESIDENCE 1 YEAR AGO - Population 1 year and over
HC03_VC119	Percent; RESIDENCE 1 YEAR AGO - Population 1 year and over
HC04_VC119	Percent Margin of Error; RESIDENCE 1 YEAR AGO - Population 1 year and over
HC01_VC120	Estimate; RESIDENCE 1 YEAR AGO - Population 1 year and over - Same house
HC02_VC120	Margin of Error; RESIDENCE 1 YEAR AGO - Population 1 year and over - Same house
HC03_VC120	Percent; RESIDENCE 1 YEAR AGO - Population 1 year and over - Same house
HC04_VC120	Percent Margin of Error; RESIDENCE 1 YEAR AGO - Population 1 year and over - Same house
HC01_VC121	Estimate; RESIDENCE 1 YEAR AGO - Population 1 year and over - Different house in the U.S.
HC02_VC121	Margin of Error; RESIDENCE 1 YEAR AGO - Population 1 year and over - Different house in the U.S.
HC03_VC121	Percent; RESIDENCE 1 YEAR AGO - Population 1 year and over - Different house in the U.S.
HC04_VC121	Percent Margin of Error; RESIDENCE 1 YEAR AGO - Population 1 year and over - Different house in the U.S.
HC01_VC122	Estimate; RESIDENCE 1 YEAR AGO - Population 1 year and over - Different house in the U.S. - Same county
HC02_VC122	Margin of Error; RESIDENCE 1 YEAR AGO - Population 1 year and over - Different house in the U.S. - Same county
HC03_VC122	Percent; RESIDENCE 1 YEAR AGO - Population 1 year and over - Different house in the U.S. - Same county
HC04_VC122	Percent Margin of Error; RESIDENCE 1 YEAR AGO - Population 1 year and over - Different house in the U.S. - Same county
HC01_VC123	Estimate; RESIDENCE 1 YEAR AGO - Population 1 year and over - Different house in the U.S. - Different county
HC02_VC123	Margin of Error; RESIDENCE 1 YEAR AGO - Population 1 year and over - Different house in the U.S. - Different county
HC03_VC123	Percent; RESIDENCE 1 YEAR AGO - Population 1 year and over - Different house in the U.S. - Different county
HC04_VC123	Percent Margin of Error; RESIDENCE 1 YEAR AGO - Population 1 year and over - Different house in the U.S. - Different county
HC01_VC124	Estimate; RESIDENCE 1 YEAR AGO - Population 1 year and over - Different house in the U.S. - Different county - Same state
HC02_VC124	Margin of Error; RESIDENCE 1 YEAR AGO - Population 1 year and over - Different house in the U.S. - Different county - Same state
HC03_VC124	Percent; RESIDENCE 1 YEAR AGO - Population 1 year and over - Different house in the U.S. - Different county - Same state
HC04_VC124	Percent Margin of Error; RESIDENCE 1 YEAR AGO - Population 1 year and over - Different house in the U.S. - Different county - Same state
HC01_VC125	Estimate; RESIDENCE 1 YEAR AGO - Population 1 year and over - Different house in the U.S. - Different county - Different state
HC02_VC125	Margin of Error; RESIDENCE 1 YEAR AGO - Population 1 year and over - Different house in the U.S. - Different county - Different state
HC03_VC125	Percent; RESIDENCE 1 YEAR AGO - Population 1 year and over - Different house in the U.S. - Different county - Different state
HC04_VC125	Percent Margin of Error; RESIDENCE 1 YEAR AGO - Population 1 year and over - Different house in the U.S. - Different county - Different state
HC01_VC126	Estimate; RESIDENCE 1 YEAR AGO - Population 1 year and over - Abroad
HC02_VC126	Margin of Error; RESIDENCE 1 YEAR AGO - Population 1 year and over - Abroad
HC03_VC126	Percent; RESIDENCE 1 YEAR AGO - Population 1 year and over - Abroad
HC04_VC126	Percent Margin of Error; RESIDENCE 1 YEAR AGO - Population 1 year and over - Abroad
HC01_VC130	Estimate; PLACE OF BIRTH - Total population
HC02_VC130	Margin of Error; PLACE OF BIRTH - Total population
HC03_VC130	Percent; PLACE OF BIRTH - Total population
HC04_VC130	Percent Margin of Error; PLACE OF BIRTH - Total population
HC01_VC131	Estimate; PLACE OF BIRTH - Total population - Native
HC02_VC131	Margin of Error; PLACE OF BIRTH - Total population - Native
HC03_VC131	Percent; PLACE OF BIRTH - Total population - Native
HC04_VC131	Percent Margin of Error; PLACE OF BIRTH - Total population - Native
HC01_VC132	Estimate; PLACE OF BIRTH - Total population - Native - Born in United States
HC02_VC132	Margin of Error; PLACE OF BIRTH - Total population - Native - Born in United States
HC03_VC132	Percent; PLACE OF BIRTH - Total population - Native - Born in United States
HC04_VC132	Percent Margin of Error; PLACE OF BIRTH - Total population - Native - Born in United States
HC01_VC133	Estimate; PLACE OF BIRTH - Total population - Native - Born in United States - State of residence
HC02_VC133	Margin of Error; PLACE OF BIRTH - Total population - Native - Born in United States - State of residence
HC03_VC133	Percent; PLACE OF BIRTH - Total population - Native - Born in United States - State of residence
HC04_VC133	Percent Margin of Error; PLACE OF BIRTH - Total population - Native - Born in United States - State of residence
HC01_VC134	Estimate; PLACE OF BIRTH - Total population - Native - Born in United States - Different state
HC02_VC134	Margin of Error; PLACE OF BIRTH - Total population - Native - Born in United States - Different state
HC03_VC134	Percent; PLACE OF BIRTH - Total population - Native - Born in United States - Different state
HC04_VC134	Percent Margin of Error; PLACE OF BIRTH - Total population - Native - Born in United States - Different state
HC01_VC135	Estimate; PLACE OF BIRTH - Total population - Native - Born in Puerto Rico, U.S. Island areas, or born abroad to American parent(s)
HC02_VC135	Margin of Error; PLACE OF BIRTH - Total population - Native - Born in Puerto Rico, U.S. Island areas, or born abroad to American parent(s)
HC03_VC135	Percent; PLACE OF BIRTH - Total population - Native - Born in Puerto Rico, U.S. Island areas, or born abroad to American parent(s)
HC04_VC135	Percent Margin of Error; PLACE OF BIRTH - Total population - Native - Born in Puerto Rico, U.S. Island areas, or born abroad to American parent(s)
HC01_VC136	Estimate; PLACE OF BIRTH - Total population - Foreign born
HC02_VC136	Margin of Error; PLACE OF BIRTH - Total population - Foreign born
HC03_VC136	Percent; PLACE OF BIRTH - Total population - Foreign born
HC04_VC136	Percent Margin of Error; PLACE OF BIRTH - Total population - Foreign born
HC01_VC140	Estimate; U.S. CITIZENSHIP STATUS - Foreign-born population
HC02_VC140	Margin of Error; U.S. CITIZENSHIP STATUS - Foreign-born population
HC03_VC140	Percent; U.S. CITIZENSHIP STATUS - Foreign-born population
HC04_VC140	Percent Margin of Error; U.S. CITIZENSHIP STATUS - Foreign-born population
HC01_VC141	Estimate; U.S. CITIZENSHIP STATUS - Foreign-born population - Naturalized U.S. citizen
HC02_VC141	Margin of Error; U.S. CITIZENSHIP STATUS - Foreign-born population - Naturalized U.S. citizen
HC03_VC141	Percent; U.S. CITIZENSHIP STATUS - Foreign-born population - Naturalized U.S. citizen
HC04_VC141	Percent Margin of Error; U.S. CITIZENSHIP STATUS - Foreign-born population - Naturalized U.S. citizen
HC01_VC142	Estimate; U.S. CITIZENSHIP STATUS - Foreign-born population - Not a U.S. citizen
HC02_VC142	Margin of Error; U.S. CITIZENSHIP STATUS - Foreign-born population - Not a U.S. citizen
HC03_VC142	Percent; U.S. CITIZENSHIP STATUS - Foreign-born population - Not a U.S. citizen
HC04_VC142	Percent Margin of Error; U.S. CITIZENSHIP STATUS - Foreign-born population - Not a U.S. citizen
HC01_VC146	Estimate; YEAR OF ENTRY - Population born outside the United States
HC02_VC146	Margin of Error; YEAR OF ENTRY - Population born outside the United States
HC03_VC146	Percent; YEAR OF ENTRY - Population born outside the United States
HC04_VC146	Percent Margin of Error; YEAR OF ENTRY - Population born outside the United States
HC01_VC149	Estimate; YEAR OF ENTRY - Native
HC02_VC149	Margin of Error; YEAR OF ENTRY - Native
HC03_VC149	Percent; YEAR OF ENTRY - Native
HC04_VC149	Percent Margin of Error; YEAR OF ENTRY - Native
HC01_VC150	Estimate; YEAR OF ENTRY - Native - Entered 2010 or later
HC02_VC150	Margin of Error; YEAR OF ENTRY - Native - Entered 2010 or later
HC03_VC150	Percent; YEAR OF ENTRY - Native - Entered 2010 or later
HC04_VC150	Percent Margin of Error; YEAR OF ENTRY - Native - Entered 2010 or later
HC01_VC151	Estimate; YEAR OF ENTRY - Native - Entered before 2010
HC02_VC151	Margin of Error; YEAR OF ENTRY - Native - Entered before 2010
HC03_VC151	Percent; YEAR OF ENTRY - Native - Entered before 2010
HC04_VC151	Percent Margin of Error; YEAR OF ENTRY - Native - Entered before 2010
HC01_VC154	Estimate; YEAR OF ENTRY - Foreign born
HC02_VC154	Margin of Error; YEAR OF ENTRY - Foreign born
HC03_VC154	Percent; YEAR OF ENTRY - Foreign born
HC04_VC154	Percent Margin of Error; YEAR OF ENTRY - Foreign born
HC01_VC155	Estimate; YEAR OF ENTRY - Foreign born - Entered 2010 or later
HC02_VC155	Margin of Error; YEAR OF ENTRY - Foreign born - Entered 2010 or later
HC03_VC155	Percent; YEAR OF ENTRY - Foreign born - Entered 2010 or later
HC04_VC155	Percent Margin of Error; YEAR OF ENTRY - Foreign born - Entered 2010 or later
HC01_VC156	Estimate; YEAR OF ENTRY - Foreign born - Entered before 2010
HC02_VC156	Margin of Error; YEAR OF ENTRY - Foreign born - Entered before 2010
HC03_VC156	Percent; YEAR OF ENTRY - Foreign born - Entered before 2010
HC04_VC156	Percent Margin of Error; YEAR OF ENTRY - Foreign born - Entered before 2010
HC01_VC160	Estimate; WORLD REGION OF BIRTH OF FOREIGN BORN - Foreign-born population, excluding population born at sea
HC02_VC160	Margin of Error; WORLD REGION OF BIRTH OF FOREIGN BORN - Foreign-born population, excluding population born at sea
HC03_VC160	Percent; WORLD REGION OF BIRTH OF FOREIGN BORN - Foreign-born population, excluding population born at sea
HC04_VC160	Percent Margin of Error; WORLD REGION OF BIRTH OF FOREIGN BORN - Foreign-born population, excluding population born at sea
HC01_VC161	Estimate; WORLD REGION OF BIRTH OF FOREIGN BORN - Foreign-born population, excluding population born at sea - Europe
HC02_VC161	Margin of Error; WORLD REGION OF BIRTH OF FOREIGN BORN - Foreign-born population, excluding population born at sea - Europe
HC03_VC161	Percent; WORLD REGION OF BIRTH OF FOREIGN BORN - Foreign-born population, excluding population born at sea - Europe
HC04_VC161	Percent Margin of Error; WORLD REGION OF BIRTH OF FOREIGN BORN - Foreign-born population, excluding population born at sea - Europe
HC01_VC162	Estimate; WORLD REGION OF BIRTH OF FOREIGN BORN - Foreign-born population, excluding population born at sea - Asia
HC02_VC162	Margin of Error; WORLD REGION OF BIRTH OF FOREIGN BORN - Foreign-born population, excluding population born at sea - Asia
HC03_VC162	Percent; WORLD REGION OF BIRTH OF FOREIGN BORN - Foreign-born population, excluding population born at sea - Asia
HC04_VC162	Percent Margin of Error; WORLD REGION OF BIRTH OF FOREIGN BORN - Foreign-born population, excluding population born at sea - Asia
HC01_VC163	Estimate; WORLD REGION OF BIRTH OF FOREIGN BORN - Foreign-born population, excluding population born at sea - Africa
HC02_VC163	Margin of Error; WORLD REGION OF BIRTH OF FOREIGN BORN - Foreign-born population, excluding population born at sea - Africa
HC03_VC163	Percent; WORLD REGION OF BIRTH OF FOREIGN BORN - Foreign-born population, excluding population born at sea - Africa
HC04_VC163	Percent Margin of Error; WORLD REGION OF BIRTH OF FOREIGN BORN - Foreign-born population, excluding population born at sea - Africa
HC01_VC164	Estimate; WORLD REGION OF BIRTH OF FOREIGN BORN - Foreign-born population, excluding population born at sea - Oceania
HC02_VC164	Margin of Error; WORLD REGION OF BIRTH OF FOREIGN BORN - Foreign-born population, excluding population born at sea - Oceania
HC03_VC164	Percent; WORLD REGION OF BIRTH OF FOREIGN BORN - Foreign-born population, excluding population born at sea - Oceania
HC04_VC164	Percent Margin of Error; WORLD REGION OF BIRTH OF FOREIGN BORN - Foreign-born population, excluding population born at sea - Oceania
HC01_VC165	Estimate; WORLD REGION OF BIRTH OF FOREIGN BORN - Foreign-born population, excluding population born at sea - Latin America
HC02_VC165	Margin of Error; WORLD REGION OF BIRTH OF FOREIGN BORN - Foreign-born population, excluding population born at sea - Latin America
HC03_VC165	Percent; WORLD REGION OF BIRTH OF FOREIGN BORN - Foreign-born population, excluding population born at sea - Latin America
HC04_VC165	Percent Margin of Error; WORLD REGION OF BIRTH OF FOREIGN BORN - Foreign-born population, excluding population born at sea - Latin America
HC01_VC166	Estimate; WORLD REGION OF BIRTH OF FOREIGN BORN - Foreign-born population, excluding population born at sea - Northern America
HC02_VC166	Margin of Error; WORLD REGION OF BIRTH OF FOREIGN BORN - Foreign-born population, excluding population born at sea - Northern America
HC03_VC166	Percent; WORLD REGION OF BIRTH OF FOREIGN BORN - Foreign-born population, excluding population born at sea - Northern America
HC04_VC166	Percent Margin of Error; WORLD REGION OF BIRTH OF FOREIGN BORN - Foreign-born population, excluding population born at sea - Northern America
HC01_VC170	Estimate; LANGUAGE SPOKEN AT HOME - Population 5 years and over
HC02_VC170	Margin of Error; LANGUAGE SPOKEN AT HOME - Population 5 years and over
HC03_VC170	Percent; LANGUAGE SPOKEN AT HOME - Population 5 years and over
HC04_VC170	Percent Margin of Error; LANGUAGE SPOKEN AT HOME - Population 5 years and over
HC01_VC171	Estimate; LANGUAGE SPOKEN AT HOME - Population 5 years and over - English only
HC02_VC171	Margin of Error; LANGUAGE SPOKEN AT HOME - Population 5 years and over - English only
HC03_VC171	Percent; LANGUAGE SPOKEN AT HOME - Population 5 years and over - English only
HC04_VC171	Percent Margin of Error; LANGUAGE SPOKEN AT HOME - Population 5 years and over - English only
HC01_VC172	Estimate; LANGUAGE SPOKEN AT HOME - Population 5 years and over - Language other than English
HC02_VC172	Margin of Error; LANGUAGE SPOKEN AT HOME - Population 5 years and over - Language other than English
HC03_VC172	Percent; LANGUAGE SPOKEN AT HOME - Population 5 years and over - Language other than English
HC04_VC172	Percent Margin of Error; LANGUAGE SPOKEN AT HOME - Population 5 years and over - Language other than English
HC01_VC173	Estimate; LANGUAGE SPOKEN AT HOME - Population 5 years and over - Language other than English - Speak English less than "very well"
HC02_VC173	Margin of Error; LANGUAGE SPOKEN AT HOME - Population 5 years and over - Language other than English - Speak English less than "very well"
HC03_VC173	Percent; LANGUAGE SPOKEN AT HOME - Population 5 years and over - Language other than English - Speak English less than "very well"
HC04_VC173	Percent Margin of Error; LANGUAGE SPOKEN AT HOME - Population 5 years and over - Language other than English - Speak English less than "very well"
HC01_VC174	Estimate; LANGUAGE SPOKEN AT HOME - Population 5 years and over - Spanish
HC02_VC174	Margin of Error; LANGUAGE SPOKEN AT HOME - Population 5 years and over - Spanish
HC03_VC174	Percent; LANGUAGE SPOKEN AT HOME - Population 5 years and over - Spanish
HC04_VC174	Percent Margin of Error; LANGUAGE SPOKEN AT HOME - Population 5 years and over - Spanish
HC01_VC175	Estimate; LANGUAGE SPOKEN AT HOME - Population 5 years and over - Spanish - Speak English less than "very well"
HC02_VC175	Margin of Error; LANGUAGE SPOKEN AT HOME - Population 5 years and over - Spanish - Speak English less than "very well"
HC03_VC175	Percent; LANGUAGE SPOKEN AT HOME - Population 5 years and over - Spanish - Speak English less than "very well"
HC04_VC175	Percent Margin of Error; LANGUAGE SPOKEN AT HOME - Population 5 years and over - Spanish - Speak English less than "very well"
HC01_VC176	Estimate; LANGUAGE SPOKEN AT HOME - Population 5 years and over - Other Indo-European languages
HC02_VC176	Margin of Error; LANGUAGE SPOKEN AT HOME - Population 5 years and over - Other Indo-European languages
HC03_VC176	Percent; LANGUAGE SPOKEN AT HOME - Population 5 years and over - Other Indo-European languages
HC04_VC176	Percent Margin of Error; LANGUAGE SPOKEN AT HOME - Population 5 years and over - Other Indo-European languages
HC01_VC177	Estimate; LANGUAGE SPOKEN AT HOME - Population 5 years and over - Other Indo-European languages - Speak English less than "very well"
HC02_VC177	Margin of Error; LANGUAGE SPOKEN AT HOME - Population 5 years and over - Other Indo-European languages - Speak English less than "very well"
HC03_VC177	Percent; LANGUAGE SPOKEN AT HOME - Population 5 years and over - Other Indo-European languages - Speak English less than "very well"
HC04_VC177	Percent Margin of Error; LANGUAGE SPOKEN AT HOME - Population 5 years and over - Other Indo-European languages - Speak English less than "very well"
HC01_VC178	Estimate; LANGUAGE SPOKEN AT HOME - Population 5 years and over - Asian and Pacific Islander languages
HC02_VC178	Margin of Error; LANGUAGE SPOKEN AT HOME - Population 5 years and over - Asian and Pacific Islander languages
HC03_VC178	Percent; LANGUAGE SPOKEN AT HOME - Population 5 years and over - Asian and Pacific Islander languages
HC04_VC178	Percent Margin of Error; LANGUAGE SPOKEN AT HOME - Population 5 years and over - Asian and Pacific Islander languages
HC01_VC179	Estimate; LANGUAGE SPOKEN AT HOME - Population 5 years and over - Asian and Pacific Islander languages - Speak English less than "very well"
HC02_VC179	Margin of Error; LANGUAGE SPOKEN AT HOME - Population 5 years and over - Asian and Pacific Islander languages - Speak English less than "very well"
HC03_VC179	Percent; LANGUAGE SPOKEN AT HOME - Population 5 years and over - Asian and Pacific Islander languages - Speak English less than "very well"
HC04_VC179	Percent Margin of Error; LANGUAGE SPOKEN AT HOME - Population 5 years and over - Asian and Pacific Islander languages - Speak English less than "very well"
HC01_VC180	Estimate; LANGUAGE SPOKEN AT HOME - Population 5 years and over - Other languages
HC02_VC180	Margin of Error; LANGUAGE SPOKEN AT HOME - Population 5 years and over - Other languages
HC03_VC180	Percent; LANGUAGE SPOKEN AT HOME - Population 5 years and over - Other languages
HC04_VC180	Percent Margin of Error; LANGUAGE SPOKEN AT HOME - Population 5 years and over - Other languages
HC01_VC181	Estimate; LANGUAGE SPOKEN AT HOME - Population 5 years and over - Other languages - Speak English less than "very well"
HC02_VC181	Margin of Error; LANGUAGE SPOKEN AT HOME - Population 5 years and over - Other languages - Speak English less than "very well"
HC03_VC181	Percent; LANGUAGE SPOKEN AT HOME - Population 5 years and over - Other languages - Speak English less than "very well"
HC04_VC181	Percent Margin of Error; LANGUAGE SPOKEN AT HOME - Population 5 years and over - Other languages - Speak English less than "very well"
HC01_VC185	Estimate; ANCESTRY - Total population
HC02_VC185	Margin of Error; ANCESTRY - Total population
HC03_VC185	Percent; ANCESTRY - Total population
HC04_VC185	Percent Margin of Error; ANCESTRY - Total population
HC01_VC186	Estimate; ANCESTRY - Total population - American
HC02_VC186	Margin of Error; ANCESTRY - Total population - American
HC03_VC186	Percent; ANCESTRY - Total population - American
HC04_VC186	Percent Margin of Error; ANCESTRY - Total population - American
HC01_VC187	Estimate; ANCESTRY - Total population - Arab
HC02_VC187	Margin of Error; ANCESTRY - Total population - Arab
HC03_VC187	Percent; ANCESTRY - Total population - Arab
HC04_VC187	Percent Margin of Error; ANCESTRY - Total population - Arab
HC01_VC188	Estimate; ANCESTRY - Total population - Czech
HC02_VC188	Margin of Error; ANCESTRY - Total population - Czech
HC03_VC188	Percent; ANCESTRY - Total population - Czech
HC04_VC188	Percent Margin of Error; ANCESTRY - Total population - Czech
HC01_VC189	Estimate; ANCESTRY - Total population - Danish
HC02_VC189	Margin of Error; ANCESTRY - Total population - Danish
HC03_VC189	Percent; ANCESTRY - Total population - Danish
HC04_VC189	Percent Margin of Error; ANCESTRY - Total population - Danish
HC01_VC190	Estimate; ANCESTRY - Total population - Dutch
HC02_VC190	Margin of Error; ANCESTRY - Total population - Dutch
HC03_VC190	Percent; ANCESTRY - Total population - Dutch
HC04_VC190	Percent Margin of Error; ANCESTRY - Total population - Dutch
HC01_VC191	Estimate; ANCESTRY - Total population - English
HC02_VC191	Margin of Error; ANCESTRY - Total population - English
HC03_VC191	Percent; ANCESTRY - Total population - English
HC04_VC191	Percent Margin of Error; ANCESTRY - Total population - English
HC01_VC192	Estimate; ANCESTRY - Total population - French (except Basque)
HC02_VC192	Margin of Error; ANCESTRY - Total population - French (except Basque)
HC03_VC192	Percent; ANCESTRY - Total population - French (except Basque)
HC04_VC192	Percent Margin of Error; ANCESTRY - Total population - French (except Basque)
HC01_VC193	Estimate; ANCESTRY - Total population - French Canadian
HC02_VC193	Margin of Error; ANCESTRY - Total population - French Canadian
HC03_VC193	Percent; ANCESTRY - Total population - French Canadian
HC04_VC193	Percent Margin of Error; ANCESTRY - Total population - French Canadian
HC01_VC194	Estimate; ANCESTRY - Total population - German
HC02_VC194	Margin of Error; ANCESTRY - Total population - German
HC03_VC194	Percent; ANCESTRY - Total population - German
HC04_VC194	Percent Margin of Error; ANCESTRY - Total population - German
HC01_VC195	Estimate; ANCESTRY - Total population - Greek
HC02_VC195	Margin of Error; ANCESTRY - Total population - Greek
HC03_VC195	Percent; ANCESTRY - Total population - Greek
HC04_VC195	Percent Margin of Error; ANCESTRY - Total population - Greek
HC01_VC196	Estimate; ANCESTRY - Total population - Hungarian
HC02_VC196	Margin of Error; ANCESTRY - Total population - Hungarian
HC03_VC196	Percent; ANCESTRY - Total population - Hungarian
HC04_VC196	Percent Margin of Error; ANCESTRY - Total population - Hungarian
HC01_VC197	Estimate; ANCESTRY - Total population - Irish
HC02_VC197	Margin of Error; ANCESTRY - Total population - Irish
HC03_VC197	Percent; ANCESTRY - Total population - Irish
HC04_VC197	Percent Margin of Error; ANCESTRY - Total population - Irish
HC01_VC198	Estimate; ANCESTRY - Total population - Italian
HC02_VC198	Margin of Error; ANCESTRY - Total population - Italian
HC03_VC198	Percent; ANCESTRY - Total population - Italian
HC04_VC198	Percent Margin of Error; ANCESTRY - Total population - Italian
HC01_VC199	Estimate; ANCESTRY - Total population - Lithuanian
HC02_VC199	Margin of Error; ANCESTRY - Total population - Lithuanian
HC03_VC199	Percent; ANCESTRY - Total population - Lithuanian
HC04_VC199	Percent Margin of Error; ANCESTRY - Total population - Lithuanian
HC01_VC200	Estimate; ANCESTRY - Total population - Norwegian
HC02_VC200	Margin of Error; ANCESTRY - Total population - Norwegian
HC03_VC200	Percent; ANCESTRY - Total population - Norwegian
HC04_VC200	Percent Margin of Error; ANCESTRY - Total population - Norwegian
HC01_VC201	Estimate; ANCESTRY - Total population - Polish
HC02_VC201	Margin of Error; ANCESTRY - Total population - Polish
HC03_VC201	Percent; ANCESTRY - Total population - Polish
HC04_VC201	Percent Margin of Error; ANCESTRY - Total population - Polish
HC01_VC202	Estimate; ANCESTRY - Total population - Portuguese
HC02_VC202	Margin of Error; ANCESTRY - Total population - Portuguese
HC03_VC202	Percent; ANCESTRY - Total population - Portuguese
HC04_VC202	Percent Margin of Error; ANCESTRY - Total population - Portuguese
HC01_VC203	Estimate; ANCESTRY - Total population - Russian
HC02_VC203	Margin of Error; ANCESTRY - Total population - Russian
HC03_VC203	Percent; ANCESTRY - Total population - Russian
HC04_VC203	Percent Margin of Error; ANCESTRY - Total population - Russian
HC01_VC204	Estimate; ANCESTRY - Total population - Scotch-Irish
HC02_VC204	Margin of Error; ANCESTRY - Total population - Scotch-Irish
HC03_VC204	Percent; ANCESTRY - Total population - Scotch-Irish
HC04_VC204	Percent Margin of Error; ANCESTRY - Total population - Scotch-Irish
HC01_VC205	Estimate; ANCESTRY - Total population - Scottish
HC02_VC205	Margin of Error; ANCESTRY - Total population - Scottish
HC03_VC205	Percent; ANCESTRY - Total population - Scottish
HC04_VC205	Percent Margin of Error; ANCESTRY - Total population - Scottish
HC01_VC206	Estimate; ANCESTRY - Total population - Slovak
HC02_VC206	Margin of Error; ANCESTRY - Total population - Slovak
HC03_VC206	Percent; ANCESTRY - Total population - Slovak
HC04_VC206	Percent Margin of Error; ANCESTRY - Total population - Slovak
HC01_VC207	Estimate; ANCESTRY - Total population - Subsaharan African
HC02_VC207	Margin of Error; ANCESTRY - Total population - Subsaharan African
HC03_VC207	Percent; ANCESTRY - Total population - Subsaharan African
HC04_VC207	Percent Margin of Error; ANCESTRY - Total population - Subsaharan African
HC01_VC208	Estimate; ANCESTRY - Total population - Swedish
HC02_VC208	Margin of Error; ANCESTRY - Total population - Swedish
HC03_VC208	Percent; ANCESTRY - Total population - Swedish
HC04_VC208	Percent Margin of Error; ANCESTRY - Total population - Swedish
HC01_VC209	Estimate; ANCESTRY - Total population - Swiss
HC02_VC209	Margin of Error; ANCESTRY - Total population - Swiss
HC03_VC209	Percent; ANCESTRY - Total population - Swiss
HC04_VC209	Percent Margin of Error; ANCESTRY - Total population - Swiss
HC01_VC210	Estimate; ANCESTRY - Total population - Ukrainian
HC02_VC210	Margin of Error; ANCESTRY - Total population - Ukrainian
HC03_VC210	Percent; ANCESTRY - Total population - Ukrainian
HC04_VC210	Percent Margin of Error; ANCESTRY - Total population - Ukrainian
HC01_VC211	Estimate; ANCESTRY - Total population - Welsh
HC02_VC211	Margin of Error; ANCESTRY - Total population - Welsh
HC03_VC211	Percent; ANCESTRY - Total population - Welsh
HC04_VC211	Percent Margin of Error; ANCESTRY - Total population - Welsh
HC01_VC212	Estimate; ANCESTRY - Total population - West Indian (excluding Hispanic origin groups)
HC02_VC212	Margin of Error; ANCESTRY - Total population - West Indian (excluding Hispanic origin groups)
HC03_VC212	Percent; ANCESTRY - Total population - West Indian (excluding Hispanic origin groups)
HC04_VC212	Percent Margin of Error; ANCESTRY - Total population - West Indian (excluding Hispanic origin groups)
HC01_VC216	Estimate; COMPUTERS AND INTERNET USE - Total households
HC02_VC216	Margin of Error; COMPUTERS AND INTERNET USE - Total households
HC03_VC216	Percent; COMPUTERS AND INTERNET USE - Total households
HC04_VC216	Percent Margin of Error; COMPUTERS AND INTERNET USE - Total households
HC01_VC217	Estimate; COMPUTERS AND INTERNET USE - Total households - With a computer
HC02_VC217	Margin of Error; COMPUTERS AND INTERNET USE - Total households - With a computer
HC03_VC217	Percent; COMPUTERS AND INTERNET USE - Total households - With a computer
HC04_VC217	Percent Margin of Error; COMPUTERS AND INTERNET USE - Total households - With a computer
HC01_VC218	Estimate; COMPUTERS AND INTERNET USE - Total households - With a broadband Internet subscription
HC02_VC218	Margin of Error; COMPUTERS AND INTERNET USE - Total households - With a broadband Internet subscription
HC03_VC218	Percent; COMPUTERS AND INTERNET USE - Total households - With a broadband Internet subscription
HC04_VC218	Percent Margin of Error; COMPUTERS AND INTERNET USE - Total households - With a broadband Internet subscription
